# Supplementary material for: Dynamics of a methanol-fed marine denitrifying biofilm: 2—impact of environmental changes on the microbial community
Source: PeerJ journal article supplement (doi:10.7717/peerj.7467), 2019-08-13

**Figure S2. Evolutionary relationships of OTUs derived from the OB and the IO biofilm cultures with the genera *Hyphomicrobium* and *Methylophaga***

An unrooted phylogenetic tree demonstrating the evolutionary relationship of 16S rRNA gene sequences (V6-V7-V8 regions) is illustrated. The evolutionary history was inferred using the Minimum Evolution method [1]. The percentage of replicate trees in which the associated taxa clustered together in the bootstrap test (1000 replicates) are shown next to the branches [2]. The tree is drawn to scale, with branch lengths in the same units as those of the evolutionary distances used to infer the phylogenetic tree. The evolutionary distances were computed using the Maximum Composite Likelihood method [3] and are in the units of the number of base substitutions per site. The rate variation among sites was modeled with a gamma distribution (shape parameter = 1.7). The ME tree was searched using the Close;Neighbor;Interchange (CNI) algorithm [4] at a search level of 1. The Neighbor;joining algorithm [5] was used to generate the initial tree. All positions with less than 95% site coverage were eliminated. That is, fewer than 5% alignment gaps, missing data, and ambiguous bases were allowed at any position. There were a total of 409 positions in the final dataset. Evolutionary analyses were conducted in MEGA6 [6]. Beside OTU names are the number of reads derived from the OB and the IO biofilm cultures, respectively, and the percentage of identity with *H. nitrativorans* NL23 16S sequence (Panel A) or with *M. nitratireducens* JAM1 16S sequence (Panel B). Beside the species names is the GenBank accession number.

Panel A: *Hyphomicrobium*

The optimal tree with the sum of branch length = 1.70056439 is shown. The analysis involved 46 nucleotide sequences.

Panel B: *Methylophaga*

The optimal tree with the sum of branch length = 1.56790826 is shown. The analysis involved 54 nucleotide sequences.

1. Rzhetsky A. and Nei M. (1992). A simple method for estimating and testing minimum evolution trees. *Molecular Biology and Evolution* **9**:945-967.
2. Felsenstein J. (1985). Confidence limits on phylogenies: An approach using the bootstrap. *Evolution* **39**:783-791.
3. Tamura K., Nei M., and Kumar S. (2004). Prospects for inferring very large phylogenies by using the neighbor-joining method. *Proceedings of the National Academy of Sciences (USA)* **101**:11030-11035.
4. Nei M. and Kumar S. (2000). *Molecular Evolution and Phylogenetics*. Oxford University Press, New York.
5. Saitou N. and Nei M. (1987). The neighbor-joining method: A new method for reconstructing phylogenetic trees. *Molecular Biology and Evolution* **4**:406-425.
6. Tamura K., Stecher G., Peterson D., Filipski A., and Kumar S. (2013). MEGA6: Molecular Evolutionary Genetics Analysis version 6.0. *Molecular Biology and Evolution* **30**: 2725-2729.

A

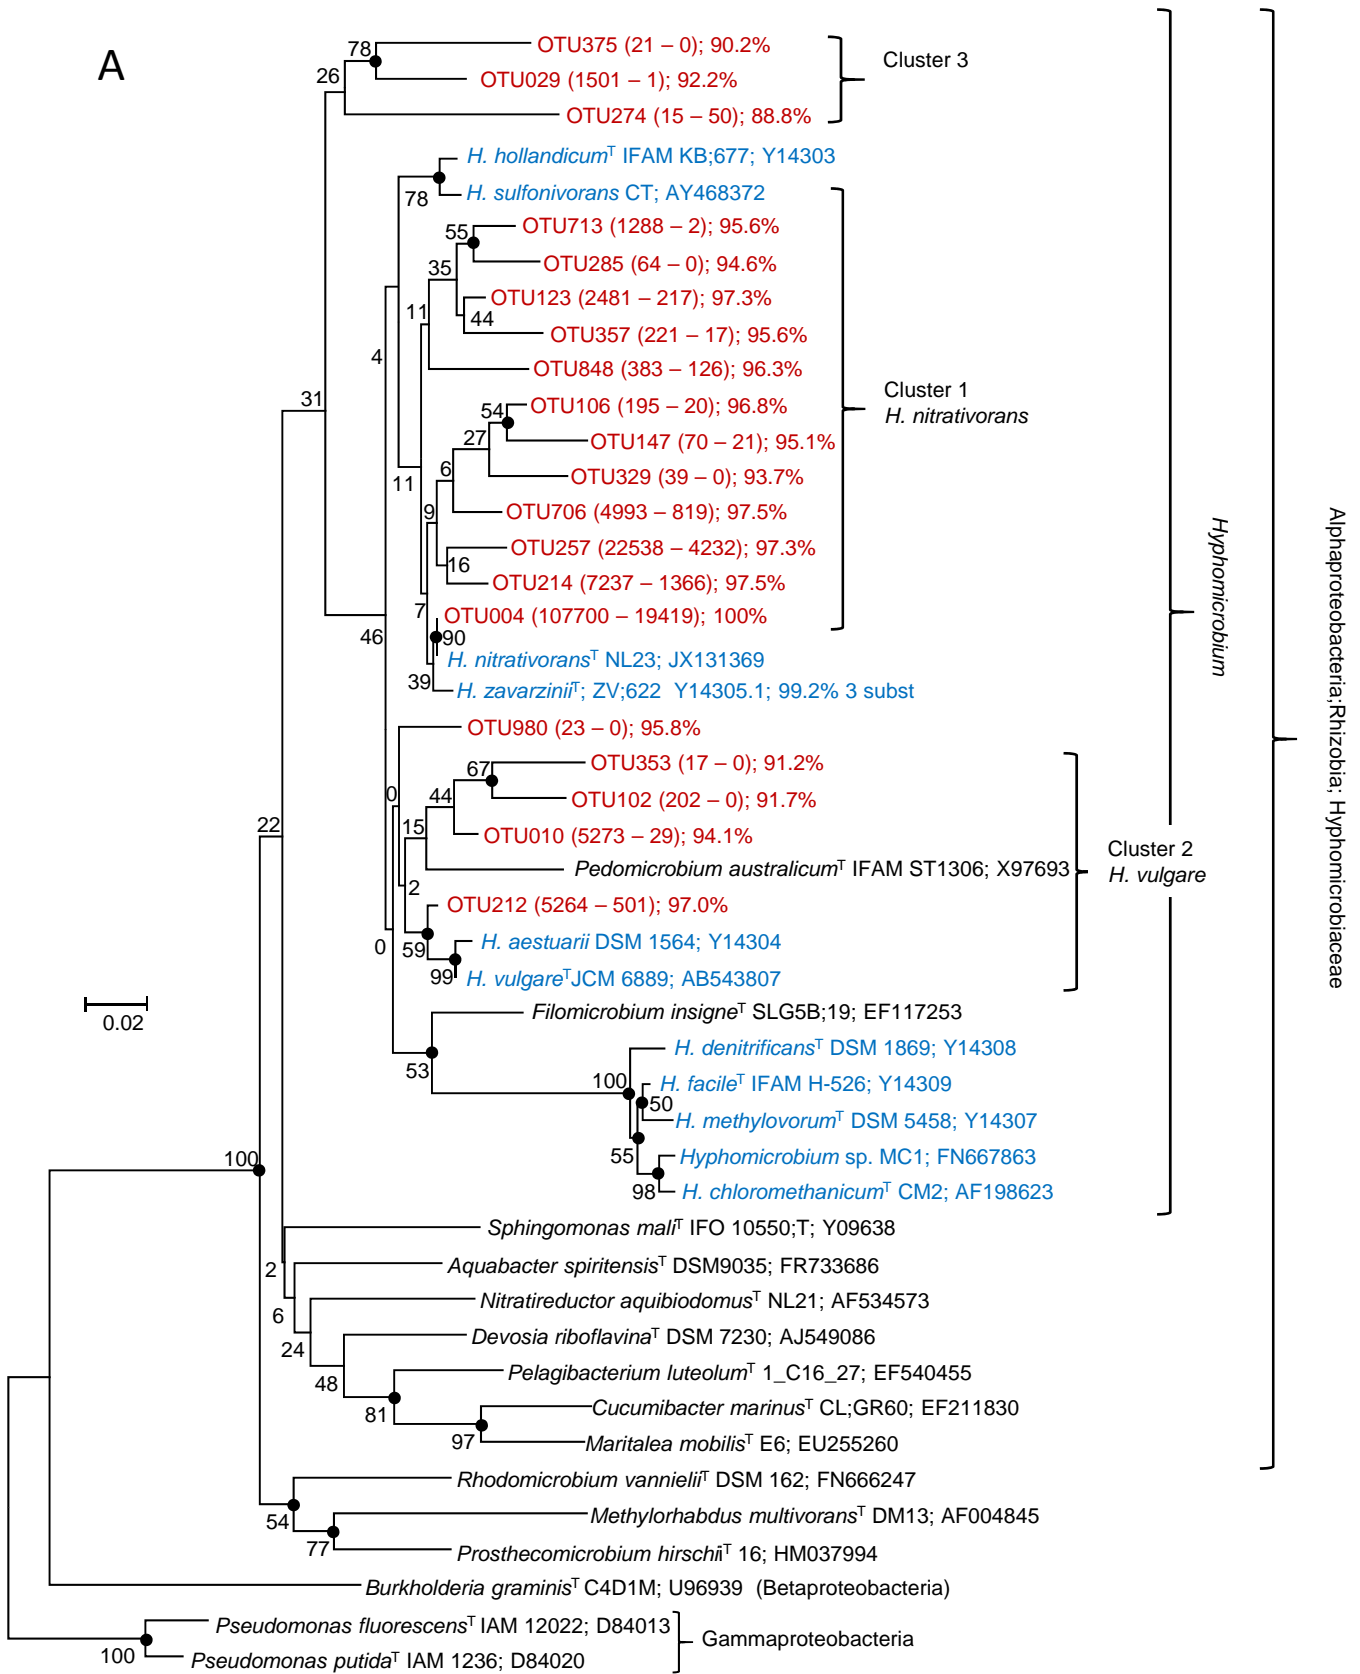

B

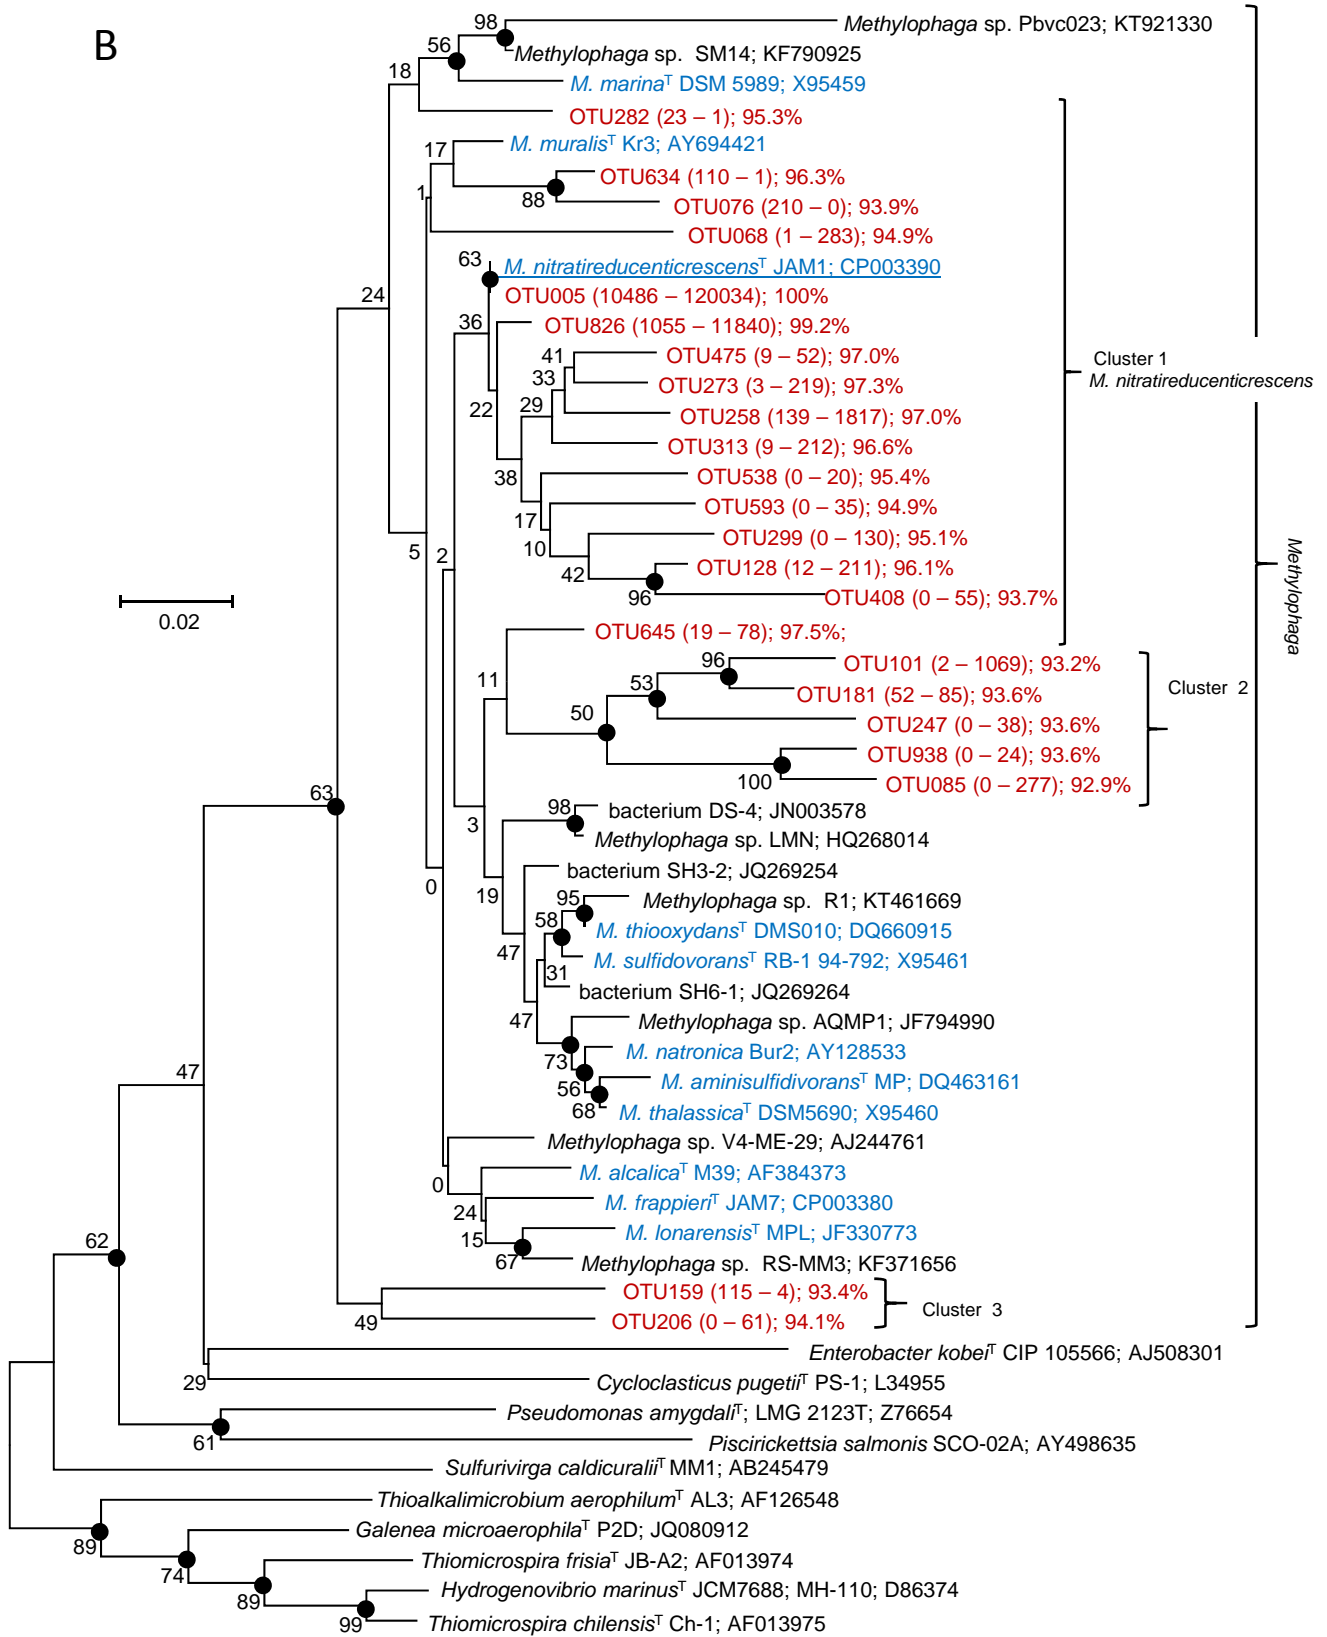

Supplement: Figure_S2.pdf [file Figure_S2.pdf]
