# Supplementary material for: Dynamics of a methanol-fed marine denitrifying biofilm: 2—impact of environmental changes on the microbial community
Source: PeerJ. 2019 Aug 13;7:e7467. doi: 10.7717/peerj.7467 (PMC6697039; doi:10.7717/peerj.7467)
Supplement: Document S4 — Affiliation of the associated genes found in the de novo assembled sequences Estimation of the proportions of the microbial taxa in the metatranscriptomes Denitrification genes found in selected bacterial taxa from the de novo assembly [file peerj-07-7467-s010.xlsx]

## Sheet: Affiliation
	Raw data for Table 6
	Affliation of the associalted genes found in the de novo assembled sequences
	In grey: Chosen bacterial taxa for further analyses (see supplemental documents 5, 6, 7)
	Nbr ORF are the numbers of genes found per affiliation
Ref300N-23C							900N-30C							0%NaCl
Transcripts with no identified gene					964		Transcripts with no identified gene					1649		Transcripts with no identified gene					894
Domain	phylum	class	order	genus	Nbr ORF		Domain	phylum	class	order	genus	Nbr ORF		Domain	phylum	class	order	genus	Nbr ORF
Archaea					25		Archaea					70		Archaea					57
Eukaryota					22		Eukaryota					60		Eukaryota					60
Unclassified					4509		Unclassified					6956		Unclassified					6059
Bacteria					50037		Bacteria					58588		Bacteria					51372
	Actinobacteria				775			Actinobacteria				320			Actinobacteria				562
		Actinobacteria			763				Actinobacteria			297				Actinobacteria			542
			Streptomycetales		696					Streptomycetales		115					Streptomycetales		275
				Streptomyces	692						Streptomyces	114						Streptomyces	272
	Bacteroidetes				8614			Bacteroidetes				15309			Bacteroidetes				9823
		Bacteroidia			1447				Bacteroidia			2281				Bacteroidia			4338
			Bacteroidales		915					Bacteroidales		1299					Bacteroidales		645
				Lentimicrobium	706						Lentimicrobium	916						Lentimicrobium	350
			Marinilabiliales		504					Marinilabiliales		865					Marinilabiliales		3675
				Sunxiuqinia	53						Sunxiuqinia	136						Sunxiuqinia	536
				Salinivirga	53						Salinivirga	110						Salinivirga	64
				Alkaliflexus	10						Alkaliflexus	16						Alkaliflexus	138
				Geofilum	18						Geofilum	37						Geofilum	2423
		Chitinophagia			47				Chitinophagia			100				Chitinophagia			116
		Cytophagia			388				Cytophagia			775				Cytophagia			766
			Cytophagales		384					Cytophagales		754					Cytophagales		762
		Flavobacteriia			6329				Flavobacteriia			11089				Flavobacteriia			3688
			Flavobacteriales		6327					Flavobacteriales		11086					Flavobacteriales		3688
				Aequorivita	3181						Aequorivita	5411						Aequorivita	254
				Flavobacterium	128						Flavobacterium	138						Flavobacterium	190
				Muricauda	54						Muricauda	230						Muricauda	18
				Winogradskyella	1543						Winogradskyella	1881						Winogradskyella	36
				Xanthomarina	32						Xanthomarina	1106						Xanthomarina	1804
		Saprospiria			32				Saprospiria			82				Saprospiria			114
		Sphingobacteriia	Sphingobacteriales		139				Sphingobacteriia	Sphingobacteriales		308				Sphingobacteriia	Sphingobacteriales		317
				Pedobacter	45						Pedobacter	103						Pedobacter	120
	Caldithrixae				39			Caldithrixae				116			Caldithrixae				12
	Cyanobacteria				71			Cyanobacteria				277			Cyanobacteria				138
			Synechococcales		24					Synechococcales		126					Synechococcales		32
	Firmicutes				156			Firmicutes				418			Firmicutes				556
		Bacilli			79				Bacilli			210				Bacilli			181
			Bacillales		62					Bacillales		172					Bacillales		160
		Clostridia			70				Clostridia			171				Clostridia			317
			Clostridiales		64					Clostridiales		137					Clostridiales		301
	Ignavibacteriae				1123			Ignavibacteriae				2370			Ignavibacteriae				31
		Ignavibacteria			1123				Ignavibacteria			2370				Ignavibacteria			31
			Ignavibacteriales		1123					Ignavibacteriales		2366					Ignavibacteriales		31
				Ignavibacterium	434						Ignavibacterium	772						Ignavibacterium	12
				Melioribacter	645						Melioribacter	1116						Melioribacter	19
	Proteobacteria				37304			Proteobacteria				35835			Proteobacteria				36657
		Alphaproteobacteria			20450				Alphaproteobacteria			19048				Alphaproteobacteria			21785
			Rhizobiales		1457					Rhizobiales		1709					Rhizobiales		7002
				Aminobacter	5						Aminobacter	102						Aminobacter	748
				Aquamicrobium	5						Aquamicrobium	112						Aquamicrobium	654
				Hoeflea	732						Hoeflea	15						Hoeflea	204
				Hyphomicrobium	0						Hyphomicrobium	418						Hyphomicrobium	1273
				Mesorhizobium	86						Mesorhizobium	266						Mesorhizobium	1468
				Nitratireductor	35						Nitratireductor	52						Nitratireductor	195
				Rhizobium	107						Rhizobium	91						Rhizobium	272
			Rhodobacterales		15395					Rhodobacterales		14830					Rhodobacterales		9710
				Aliiroseovarius	167						Aliiroseovarius	152						Aliiroseovarius	152
				Celeribacter	127						Celeribacter	134						Celeribacter	65
				Labrenzia	230						Labrenzia	435						Labrenzia	92
				Lentibacter	159						Lentibacter	78						Lentibacter	4
				Loktanella	133						Loktanella	99						Loktanella	76
				Lutimaribacter	273						Lutimaribacter	198						Lutimaribacter	42
				Maritimibacter	993						Maritimibacter	1060						Maritimibacter	1686
				Oceanicola	136						Oceanicola	95						Oceanicola	48
				Paracoccus	222						Paracoccus	290						Paracoccus	171
				Phaeobacter	103						Phaeobacter	71						Phaeobacter	14
				Pseudooceanicola	196						Pseudooceanicola	139						Pseudooceanicola	59
				Roseobacter	140						Roseobacter	111						Roseobacter	24
				Roseovarius	2170						Roseovarius	2935						Roseovarius	108
				Ruegeria	349						Ruegeria	274						Ruegeria	67
				Stappia	5277						Stappia	5356						Stappia	5106
				Sulfitobacter	339						Sulfitobacter	165						Sulfitobacter	72
				Thalassobius	238						Thalassobius	132						Thalassobius	40
				Thioclava	103						Thioclava	87						Thioclava	18
			Rhodospirillales		3253					Rhodospirillales		2168					Rhodospirillales		4452
				Oceanibaculum	3056						Oceanibaculum	1983						Oceanibaculum	4207
			Sphingomonadales		67					Sphingomonadales		102					Sphingomonadales		117
		Betaproteobacteria			339				Betaproteobacteria			462				Betaproteobacteria			1474
			Burkholderiales		218					Burkholderiales		261					Burkholderiales		291
			Rhodocyclales		33					Rhodocyclales		80					Rhodocyclales		1046
				Azoarcus	13						Azoarcus	36						Azoarcus	588
				Thauera	13						Thauera	29						Thauera	218
		Deltaproteobacteria			134				Deltaproteobacteria			3827				Deltaproteobacteria			3516
			Bradymonadales		11					Bradymonadales		2450					Bradymonadales		2477
				Bradymonas	11						Bradymonas	2449						Bradymonas	2477
			Desulfobacterales		45					Desulfobacterales		106					Desulfobacterales		46
			Myxococcales		20					Myxococcales		734					Myxococcales		730
		Gammaproteobacteria			15999				Gammaproteobacteria			11583				Gammaproteobacteria			9365
			Alteromonadales		4256					Alteromonadales		639					Alteromonadales		234
				Idiomarina	1171						Idiomarina	48						Idiomarina	57
				Marinobacter	2736						Marinobacter	324						Marinobacter	46
			Cellvibrionales		180					Cellvibrionales		323					Cellvibrionales		80
			Chromatiales		203					Chromatiales		981					Chromatiales		164
				Wenzhouxiangella	33						Wenzhouxiangella	764						Wenzhouxiangella	23
			Oceanospirillales		6182					Oceanospirillales		4074					Oceanospirillales		3284
				Marinicella	5693						Marinicella	3414						Marinicella	3046
				Halomonas	69						Halomonas	143						Halomonas	36
			Pseudomonadales		223					Pseudomonadales		339					Pseudomonadales		2865
				Pseudomonas	170						Pseudomonas	288						Pseudomonas	2841
			Thiotrichales		3817					Thiotrichales		3855					Thiotrichales		1978
				Methylophaga	3733						Methylophaga	3781						Methylophaga	1923
			Vibrionales		101					Vibrionales		83					Vibrionales		43
			Xanthomonadales		170					Xanthomonadales		134					Xanthomonadales		105
	Spirochaetes	Spirochaetia			18			Spirochaetes	Spirochaetia			33			Spirochaetes				419
			Spirochaetales		12					Spirochaetales		18				Spirochaetia	Spirochaetales		407
				Sphaerochaeta	0						Sphaerochaeta	0						Sphaerochaeta	323
	Tenericutes				1352			Tenericutes				1387			Tenericutes				2207
			Tenericutes bacterium MO-XQ/MZ-XQ		1345					Tenericutes bacterium MO-XQ/MZ-XQ		1382					Tenericutes bacterium MO-XQ/MZ-XQ		2158
	Autres (47)				410			Autres (55)				809			Autres (51)				567
Plasmid--related					177		Plasmid--related					257		Plasmid--related					218
Phage-related					134		Phage-related					193		Phage-related					150
Virus					78		Virus					89		Virus					69
	dsRNA viruses	unclassified dsRNA viruses	unclassified dsRNA viruses	Cystoviridae/Pseudomonas Cystovirus phi6	31			dsRNA viruses	unclassified dsRNA viruses	unclassified dsRNA viruses	Cystoviridae/Pseudomonas Cystovirus phi6	32			dsRNA viruses	unclassified dsRNA viruses	unclassified dsRNA viruses	Cystoviridae/Pseudomonas Cystovirus phi6	25
	ssDNA viruses	unclassified ssDNA viruses	unclassified ssDNA viruses	Microviridae/Enterobacteria phage phiX174	15			ssDNA viruses	unclassified ssDNA viruses	unclassified ssDNA viruses	Microviridae/Enterobacteria phage phiX174	15			ssDNA viruses	unclassified ssDNA viruses	unclassified ssDNA viruses	Microviridae/Enterobacteria phage phiX174	15

## Sheet: qPCR corrected
Estimation of the proportions of each bacterial taxa in the metatranscriptomes
	Ref300N-23C				900N-30C				0%NaCl
	Reads	Proportion	TPM		Reads	Proportion	TPM		Reads	Proportion	TPM
Number of reads aligned to the 3 reference genomes	66896651	0.9515	951524		63647952	0.904703	904703		56629480	0.927752	927752			Proportion was calculated from the Reads column
Number of reads aligned to the de novo assembled transcripts	3408084	0.0485	48476		6704375	0.0952971	95297.1		4410001	0.0722483	72248.3			TPM: The proportion transposed in transcripts per million
			1000000				1000000				1000000
	Ref300N-23C				900N-30C				0%NaCl
	Genes #	Genes ID	sTPM	sTPM norm	Genes	Ass	TPM	TPM norm	Genes	Ass	TPM	TPM norm
Aequorivita	3181	2692	18218	883.136	5411	4680	25569	2436.65	254	234	1398	101.003
Aminobacter	5	5	17.5	0.84833	101	92	438	41.7401	748	633	5385	389.057		Genes #: Number of genes in the de novo assembled transcripts associated to the taxa (see the affiliation sheet)
Aquamicrobium	5	4	23	1.11495	112	105	456	43.4555	654	570	22835	1649.79		Genes ID: Number of genes identified, after removing the doublons (from the supplemental documents 5, 6, 7)
Azoarcus	13	9	48	2.32685	32	28	120	11.4357	588	495	2854	206.197		sTPM: Calculated by the sum of all TPM of genes associated to the corresponding taxa (from the supplemental documents 5, 6, 7)
Bradymonas	11	10	73	3.53875	2449	1131	9652	919.808	2477	1610	11178	807.592		sTPM norm: sTPM normalized by the following calculation:
Geofilum	17	16	77	3.73265	37	31	109	10.3874	2423	2138	11870	857.588				(sTPM * de novo assembled transcripts TPM [line 11])/1000000
Hoeflea	732	648	3882	188.184	15	15	87	8.29085	204	190	1365	98.619				Example: Aequorivita in the Ref300N-23C biofilm cultures
Hyphomicrobium others	0	0	0	0	418	375	1679	160.004	1273	1174	30057	2171.57					(18218*48476)/1000000 = 883
Idiomarina	1171	957	5147	249.506	48	41	1027	97.8702	57	50	513	37.0634
Ignavibacteriales	1123	995	5513	267.248	2366	1217	14206	1353.79	31	30	171	12.3545
Lentimicrobium	706	571	3032	146.979	916	737	3370	321.151	350	322	1671	120.727
Marinicella	5693	4595	36554	1771.99	3414	2194	125466	11956.5	3046	2517	14924	1078.23
Marinobacter	2736	2245	14545	705.083	324	273	1122	106.923	46	43	264	19.0736
Maritimibacter	993	868	6363	308.453	1060	933	8360	796.684	1686	1302	10000	722.483
Mesorhizobium	85	70	411	19.9236	258	227	1050	100.062	1468	1192	12505	903.465
Methylophaga others	3733	3229	64802	3141.34	3781	3383	78566	7487.11	1923	1705	80482	5814.69
Oceanibaculum	3056	2406	18115	878.143	1983	1627	9071	864.44	4207	3006	25544	1845.51
Paracoccus	222	194	1427	69.1753	290	261	1219	116.167	171	152	1204	86.987
Pseudomonas	169	153	6175	299.339	286	246	1333	127.031	2841	2395	18198	1314.78
Roseovarius	2170	1915	12367	599.503	2935	2532	16479	1570.4	108	95	686	49.5624
Stappia	5277	3929	39926	1935.45	5356	4045	30885	2943.25	5106	3980	39745	2871.51
Streptomyces	692	604	6103	295.849	114	105	729	69.4716	272	252	2499	180.549
Sunxiuqinia	52	47	212	10.2769	136	110	504	48.0298	536	486	2639	190.663
Tenericutes	1345	1111	6367	308.647	1365	1124	5003	476.772	2160	1333	13409	968.778
Wenzhouxiangella	33	28	132	6.39883	764	666	2857	272.264	23	20	83	5.99661
Winogradskyella	1543	1373	8182	396.631	1881	1687	7917	754.467	36	33	169	12.21
Xanthomarina	32	31	190	9.21044	1106	1009	4555	434.078	1804	1602	9598	693.44
Total	34795	28705	257902	12502	36958	28874	351829	33528.3	34492	27559	321246	23209.5
Others	19798	16160	394432	19120.5	28717	22175	451434	43020.4	23056	18243	312867	22604.1
Total			651594	31586.7			798198	76066			634113	45813.6
Mobile Elements			99623	4829.32			5740	547.006			217095	15684.8
No genes			248782	12060			196062	18684.1			148792	10750
Total			1e+06	48476			1000000	95297.1			1000000	72248.3
	Ref300N-23C				900N-30C				0%NaCl
	qPCR cp/ng				qPCR cp/ng				qPCR cp/ng
Hyphomicrobium NL23 (napA)	178				132				28400					qPCR results from Table 2
Methylophaga JAM1 / GP59 (narG1)	233000				215000				47200
	Proportion			TPM norm	Proportion			TPM norm	Proportion			TPM norm		Proportion was calculated from qPCR results
Hyphomicrobium NL23	0.000763365			726.36	0.000613577			555.105	0.375661			348520		TPM norm: TPM normalized by the following calculation:
Methylophaga JAM1 / GP59	0.999237			950798	0.999386			904148	0.624339			579231				(Proportion * total TPM of the three strains [in line 10])/1000000
				951524				904703				927752				Example: Strain NL23 in the Ref300N-23C biofilm cultures
Total				1e+06				1e+06				1000000					(0.00076337*951524)/1000000 = 726

## Sheet: Denitrification
Denitrification genes found in selected bacterial taxa from the de novo assembly
	Denitrification genes
	Ref300N-23C	900N-30C	0%NaCl
Aequorivita	nirK, norB, nosZ;D	nirK, norB;C;D;Q, nosZ;DFY	nosZ
Aminobacter	-	-	napA,
Aquamicrobium	-	-	napA
Azoarcus	-	-	napA, nosZ
Bradymonas	-	-	-
Geofilum	-	-	nrfA
Hoeflea	narG;H;I nosZ;D	nirK	narG;H;J, nosZ;R
Hyphomicrobium	-	narH;I, norB;C;Q;D;E, nosZ;D;R	napA;C;F, nirK, norB;C;D;Q, nosZ;D;F;R,
Idiomarina	narG;H;J nirK, nirS, norB	nirS	-
Ignavibacteriales	nrfA, nrfH	napC;H, nrfA;H	-
Lentimicrobium	-	-	-
Marinicella	nirS, norDQBC	nirS, norB;C;Q;D	nirS, norB;C;Q
Marinobacter	narG;H;J;I, norB;C:Q, nirK, nirS, nosZ;F;D;R	norB;C;Q	nirS
Maritimibacter	narI	-	-
Mesorhizobium	-	-	napA;D;E, nirK, nosZ
Methylophaga	narG;H;J;I, norB;C;D;Q, nosR	narG;H;J;I, norB;C;D;Q;E, nosD;R	narG;H;J;I, norB;C;D;Q, nosD;R
Oceanibaculum	narG;H;J;I	narG;H;JI	narGHJI
Paracoccus	nirS, norC, nosR	nirS, NR, norQ;C;D, Amt, nosR	nirS
Pseudomonas	-	-	narG;H;J;I, nirK, nirS, norB;C;D;Q, nosZ;R,
Roseovarius	nirS, norB;C;D;Q, nosZ;R	nirS, nirK, norB;C;D;Q;E, nosZ;D	-
Stappia	napABC, napADFE-nnrS, nirK, norCBQD, nosRZDF	napABC, napADFE-nnrS, nirK, norCBQD, norE	napADFE, napABC, nirK, norB;C;D;Q, nosZ;D;F;R
Streptomyces	-	-	-
Sunxiuqinia	-	-	nrfA, norB
Tenericutes	-	-	-
Wenzhouxiangella	-	-	-
Winogradskyella	nirK, nosZ	nirK, norC, nosZ;L;D	-
Xanthomarina	-	nirK, norB;D;C;Q, nosZ;L;D	nirK
