# Supplementary material for: Dynamics of a methanol-fed marine denitrifying biofilm: 2—impact of environmental changes on the microbial community
Source: PeerJ. 2019 Aug 13;7:e7467. doi: 10.7717/peerj.7467 (PMC6697039; doi:10.7717/peerj.7467)
Supplement: Document S5 [file peerj-07-7467-s011.xlsx]

## Sheet: Summary
	Analysis of de novo assembled transcripts of the Ref300N-23C biofilm cultures
	Genes	Transcripts	TPM	Nitrogen	Sugar transporters
Aequorivita	3181	2692	18218	nirK, norB, nosZ, nosD	di/tricarboxylate transporter
Aminobacter	5	5	17.5	-	-
Aquamicrobium	5	4	23	-	-
Azoarcus	13	9	48	-	-
Bradymonas	11	10	73	-	-
Geofilum	17	16	77	-	-
Hoeflea	732	648	3882	narG, narI, narH, nosZ, nosD	Xylose, Glucose/mannose, ribose, simple sugar, multiple sugar, sorbitol/mannitol, carbohydrates, dicarboxylate
Hyphomicrobium	0	0	0	-	-
Idiomarina	1171	957	5147	narGH, narJ, nirK, nirK/nirS, norB	Acetate, dicarboxylate (e.g.succinate)
Ignavibacteriales	1123	995	5513	nrfA, nrfH	maltose/moltooligosaccharide
Lentimicrobium	706	571	3032	-	Fucose
Marinicella	5693	4595	36554	nirS, norDQBC, nirD (ass)	di/tricarboxylate
Marinobacter	2736	2245	14545	narG, narH, narJ, narI, norBC, norQ, nirK, nirS, nosZ, nosF, nosD, nosR	Acetate, di/tricarboxylate
Maritimibacter	993	868	6363	narI	Simple sugar, dicarboxylate
Mesorhizobium	85	70	411	-	Ribose, simple sugar, tricarboxylate
Methylophaga	3733	3229	64802	narXL, narG, narH, narJ, narI, nirB (ass), norB, norC, norD, norQ, nosR, Amt	Methanol, C4-dicarboxylate
Oceanibaculum	3056	2406	18115	narJI, narGH, Amt	trehalose/maltose, dicarboxylate
Paracoccus	222	194	1427	nirS, norC, nosR	Methanol, C4-dicarboxylate
Pseudomonas	169	153	6175	-	-
Roseovarius	2170	1915	12367	nirS, norBC, norDQ, nosZ, nosR, Amt	Simple sugar, dicarboxylate
Stappia	5277	3929	39926	napABC, napADFE-nnrS, nirK, norCBQD, nosRZDF, Amt	Acetate, dicarboxylate, xylose, fructose, multiple sugar, simple sugar
Streptomyces	692	604	6103	-	acetate
Sunxiuqinia	52	47	212	-	-
Tenericutes	1345	1111	6367	-	simple and multiple sugar
Wenzhouxiangella	33	28	132	-	-
Winogradskyella	1543	1373	8182	nirK, nosZ	maltose/moltooligosaccharide, dicarboxylate
Xanthomarina	32	31	190	-	-
Other bacteria	15242	12105	113200	many
Archaea	25	24	113
Eukarya	22	21	181
Unclassified	4509	4016	281015
No genes	964	964	248782
Mobile elements	389	137	996623

## Sheet: No genes
Transcripts with no genes found
	Number of Gene ID TrinityAssID Trinity (after removing doublon):					964
	TPM (sum of the Gene ID Trinity )					248782
Gene count					Isoform count
Gene ID Trinity	length	effective_length	expected_count	TPM	Trc ID Trinity	length	effective_length	expected_count	TPM	IsoPct
DN155_c1_g1	303	104	133522	102807	DN155_c1_g1_i1	303	104	133522	102807	100
DN23983_c0_g1	354	155	107887	55736.5	DN23983_c0_g1_i1	354	155	107887	55736.5	100
DN155_c0_g1	462	263	134648	40996.5	DN155_c0_g1_i1	462	263	134648	40996.5	100
DN11273_c0_g1	418	219	31971	11690	DN11273_c0_g1_i1	418	219	19629.5	7177.42	61.4
DN10848_c2_g2	322	123.5	9286	6020.3	DN10848_c2_g2_i3	330	131	7392.73	4518.94	75.06
DN7120_c0_g1	531	332	18499	4461.8	DN7120_c0_g1_i1	531	332	18499	4461.83	100
DN11456_c1_g5	355	156	6048	3104.5	DN11456_c1_g5_i1	355	156	6048	3104.49	100
DN12630_c0_g1	353	154	4436	2306.6	DN12630_c0_g1_i1	353	154	4436	2306.61	100
DN11456_c0_g1	402	203	5666	2235	DN11456_c0_g1_i1	402	203	5666	2235.03	100
DN10319_c0_g2	238	46.2	1191	2063.3	DN10319_c0_g2_i1	238	46.22	1191	2063.33	100
DN11273_c0_g2	474	274.7	6695	1951.5	DN11273_c0_g2_i2	470	271	5930.39	1752.33	89.8
DN2959_c0_g1	228	39.1	548	1121.1	DN2959_c0_g1_i1	228	39.14	548	1121.08	100
DN34497_c0_g1	258	62	803	1036.8	DN34497_c0_g1_i1	258	62.02	803	1036.76	100
DN6_c0_g1	453	254	2131	671.8	DN6_c0_g1_i1	453	254	2131	671.82	100
DN22061_c0_g1	317	118	804	545.6	DN22061_c0_g1_i1	317	118	804	545.6	100
DN39943_c0_g1	260	63.7	429	539.2	DN39943_c0_g1_i1	260	63.71	429	539.18	100
DN37476_c0_g1	354	155	793	409.7	DN37476_c0_g1_i1	354	155	793	409.68	100
DN3933_c0_g1	289	90.2	439	389.9	DN3933_c0_g1_i1	289	90.17	439	389.87	100
DN10212_c0_g1	351	152	736	387.7	DN10212_c0_g1_i1	351	152	736	387.74	100
DN15877_c0_g1	339	140	674	385.5	DN15877_c0_g1_i1	339	140	674	385.51	100
DN11475_c0_g2	206	25.7	116	361.8	DN11475_c0_g2_i1	206	25.67	116	361.8	100
DN27922_c0_g1	404	205	924	360.9	DN27922_c0_g1_i1	404	205	924	360.93	100
DN10848_c3_g1	480	281	1163	331.4	DN10848_c3_g1_i1	480	281	1163	331.42	100
DN11485_c5_g2	293	94.1	357	303.9	DN11485_c5_g2_i1	293	94.06	357	303.92	100
DN10413_c0_g1	206	25.7	88	274.5	DN10413_c0_g1_i1	206	25.67	88	274.47	100
DN30696_c0_g1	439	240	722	240.9	DN30696_c0_g1_i1	439	240	722	240.9	100
DN11273_c0_g3	374	174.7	479	219.6	DN11273_c0_g3_i2	374	175	311.48	142.53	64.9
DN9193_c0_g1	218	32.8	85	207.8	DN9193_c0_g1_i2	217	32.04	77.91	194.73	93.69
DN11251_c0_g1	230	41.6	89	171.5	DN11251_c0_g1_i3	248	53.86	52.95	78.72	45.9
DN7519_c0_g1	334	135	285	169.1	DN7519_c0_g1_i1	341	142	232	130.83	77.38
DN35263_c0_g1	644	445	917	165	DN35263_c0_g1_i1	644	445	917	165.01	100
DN18836_c0_g1	314	115	218	151.8	DN18836_c0_g1_i1	314	115	218	151.8	100
DN11492_c1_g1	233	42.6	73	137.2	DN11492_c1_g1_i1	233	42.61	73	137.19	100
DN1884_c0_g1	305	106	181	136.7	DN1884_c0_g1_i1	305	106	181	136.73	100
DN9569_c0_g1	201	23	34	118.2	DN9569_c0_g1_i1	201	23.03	34	118.21	100
DN34026_c0_g1	207	26.2	35	106.9	DN34026_c0_g1_i1	207	26.22	35	106.88	100
DN8944_c0_g1	265	67.9	90	106.2	DN8944_c0_g1_i1	268	70.66	74.6	84.53	79.64
DN3354_c0_g1	391	192.5	231	96.1	DN3354_c0_g1_i2	346	147	102.2	55.67	57.92
DN10677_c0_g1	292	93.1	110	94.6	DN10677_c0_g1_i4	292	93.08	48	41.29	43.64
DN11333_c0_g1	347	150.2	177	94.3	DN11333_c0_g1_i2	372	173	154.83	71.67	75.96
DN4330_c0_g1	376	177	176	79.6	DN4330_c0_g1_i1	376	177	176	79.62	100
DN49772_c0_g1	226	37.8	33	69.9	DN49772_c0_g1_i1	226	37.8	33	69.91	100
DN4525_c0_g1	205	25.3	17	53.8	DN4525_c0_g1_i2	201	23.03	9	31.29	58.17
DN9561_c0_g1	565	366	243	53.2	DN9561_c0_g1_i1	565	366	243	53.17	100
DN10662_c0_g1	376	177	117	52.9	DN10662_c0_g1_i2	376	177	117	52.93	100
DN11194_c0_g1	214	30.3	18	47.5	DN11194_c0_g1_i1	210	27.9	11	31.57	66.46
DN35838_c0_g1	206	25.7	15	46.8	DN35838_c0_g1_i1	206	25.67	15	46.78	100
DN10896_c0_g1	348	149	85	45.7	DN10896_c0_g1_i1	348	149	85	45.68	100
DN14453_c0_g1	354	155	84	43.4	DN14453_c0_g1_i1	354	155	84	43.4	100
DN9331_c0_g1	540	341	165	38.8	DN9331_c0_g1_i1	540	341	165	38.75	100
DN8042_c0_g1	266	68.9	32	37.2	DN8042_c0_g1_i1	266	68.9	32	37.19	100
DN7369_c0_g1	201	23	10	34.8	DN7369_c0_g1_i1	201	23.03	10	34.77	100
DN11315_c0_g1	222	37.1	16	34.6	DN11315_c0_g1_i9	203	24.07	5.68	18.9	54.68
DN21921_c0_g1	218	32.7	14	34.3	DN21921_c0_g1_i1	218	32.65	14	34.33	100
DN22841_c0_g1	212	29.1	12	33.1	DN22841_c0_g1_i1	212	29.05	12	33.08	100
DN32987_c0_g1	206	25.7	10	31.2	DN32987_c0_g1_i1	206	25.67	10	31.19	100
DN47825_c0_g1	363	164	61	29.8	DN47825_c0_g1_i1	363	164	61	29.78	100
DN9868_c0_g1	241	48.5	18	29.8	DN9868_c0_g1_i1	241	48.46	18	29.75	100
DN42528_c0_g1	209	27.3	10	29.3	DN42528_c0_g1_i1	209	27.33	10	29.29	100
DN8860_c0_g1	211	28.5	10	28.1	DN8860_c0_g1_i1	211	28.47	10	28.12	100
DN11252_c0_g1	226	40.2	14	27.9	DN11252_c0_g1_i4	205	25.13	5.2	16.57	59.37
DN3394_c0_g1	213	29.6	10	27	DN3394_c0_g1_i1	213	29.64	10	27.02	100
DN43821_c0_g1	213	29.6	10	27	DN43821_c0_g1_i1	213	29.64	10	27.02	100
DN11357_c0_g4	262	65.4	22	26.9	DN11357_c0_g4_i1	262	65.42	22	26.93	100
DN8036_c0_g1	286	87	29	26.7	DN8036_c0_g1_i3	287	88.24	21.65	19.65	73.59
DN48736_c0_g1	219	33.3	10	24.1	DN48736_c0_g1_i1	219	33.27	10	24.07	100
DN41530_c0_g1	214	30.2	9	23.8	DN41530_c0_g1_i1	214	30.23	9	23.84	100
DN11133_c0_g1	225	37.1	11	23.7	DN11133_c0_g1_i1	225	37.13	11	23.72	100
DN4659_c0_g1	301	102	30	23.6	DN4659_c0_g1_i1	301	102	30	23.55	100
DN39643_c0_g1	363	164	48	23.4	DN39643_c0_g1_i1	363	164	48	23.44	100
DN6152_c1_g1	236	44.8	13	23.3	DN6152_c1_g1_i1	236	44.76	13	23.26	100
DN16532_c0_g1	210	27.9	8	23	DN16532_c0_g1_i1	210	27.9	8	22.96	100
DN10607_c0_g1	570	371.2	104	22.4	DN10607_c0_g1_i2	578	379	66.8	14.11	62.91
DN25711_c0_g1	212	29.1	8	22.1	DN25711_c0_g1_i1	212	29.05	8	22.05	100
DN29606_c0_g1	212	29.1	8	22.1	DN29606_c0_g1_i1	212	29.05	8	22.05	100
DN8776_c0_g1	363	164	45	22	DN8776_c0_g1_i1	363	164	45	21.97	100
DN10832_c0_g1	235	47.3	13	22	DN10832_c0_g1_i6	201	23.03	2.63	9.13	41.45
DN7713_c0_g1	256	60.5	16	21.2	DN7713_c0_g1_i2	266	68.9	11	12.78	60.37
DN14439_c0_g1	215	30.8	8	20.8	DN14439_c0_g1_i1	215	30.82	8	20.78	100
DN597_c0_g1	224	36.5	9	19.7	DN597_c0_g1_i2	222	35.18	7.91	18.01	91.29
DN4639_c0_g1	491	292	71	19.5	DN4639_c0_g1_i1	491	292	71	19.47	100
DN41591_c0_g1	205	25.1	6	19.1	DN41591_c0_g1_i1	205	25.13	6	19.12	100
DN37233_c0_g1	281	97.3	23	18.9	DN37233_c0_g1_i2	201	23.03	4	13.91	73.47
DN22567_c0_g1	265	68	16	18.8	DN22567_c0_g1_i1	265	68.02	16	18.84	100
DN498_c0_g1	214	30.2	7	18.5	DN498_c0_g1_i1	214	30.23	7	18.54	100
DN12518_c0_g1	241	48.5	11	18.2	DN12518_c0_g1_i1	241	48.46	11	18.18	100
DN38439_c0_g1	223	35.8	8	17.9	DN38439_c0_g1_i1	223	35.82	8	17.88	100
DN35565_c0_g1	201	23	5	17.4	DN35565_c0_g1_i1	201	23.03	5	17.38	100
DN6670_c0_g1	210	27.7	6	17.4	DN6670_c0_g1_i1	211	28.47	3.97	11.16	64.26
DN2310_c0_g1	210	27.9	6	17.2	DN2310_c0_g1_i1	210	27.9	6	17.22	100
DN15613_c0_g1	203	24.1	5	16.6	DN15613_c0_g1_i1	203	24.07	5	16.63	100
DN18217_c0_g1	247	53.1	11	16.6	DN18217_c0_g1_i1	247	53.07	11	16.6	100
DN34863_c0_g1	212	29.1	6	16.5	DN34863_c0_g1_i1	212	29.05	6	16.54	100
DN29478_c0_g1	204	24.6	5	16.3	DN29478_c0_g1_i1	204	24.6	5	16.28	100
DN20252_c0_g1	221	34.5	7	16.2	DN20252_c0_g1_i1	221	34.54	7	16.23	100
DN10304_c1_g2	205	25.1	5	15.9	DN10304_c1_g2_i1	205	25.13	5	15.93	100
DN15232_c0_g1	214	30.2	6	15.9	DN15232_c0_g1_i1	214	30.23	6	15.89	100
DN36027_c0_g1	214	30.2	6	15.9	DN36027_c0_g1_i1	214	30.23	6	15.89	100
DN43832_c0_g1	215	30.8	6	15.6	DN43832_c0_g1_i1	215	30.82	6	15.59	100
DN2473_c2_g1	224	36.5	7	15.4	DN2473_c2_g1_i1	224	36.47	7	15.37	100
DN10262_c0_g1	214	31.7	6	15.2	DN10262_c0_g1_i1	202	23.55	3.53	12.02	79.27
DN9456_c0_g1	216	31.6	6	15.2	DN9456_c0_g1_i2	216	31.43	5	12.74	83.86
DN26847_c0_g1	289	90.2	17	15.1	DN26847_c0_g1_i1	289	90.17	17	15.1	100
DN3485_c0_g1	260	63.7	12	15.1	DN3485_c0_g1_i1	260	63.71	12	15.08	100
DN10943_c0_g2	232	42.3	8	15.1	DN10943_c0_g2_i2	228	39.14	3.36	6.86	45.35
DN36366_c0_g1	208	26.8	5	15	DN36366_c0_g1_i1	208	26.77	5	14.95	100
DN38178_c0_g1	217	32	6	15	DN38178_c0_g1_i1	217	32.04	6	15	100
DN11606_c1_g1	355	163	30	14.7	DN11606_c1_g1_i1	203	24.07	1.61	5.37	36.45
DN8753_c0_g1	279	83.6	15	14.4	DN8753_c0_g1_i2	239	46.96	4.03	6.87	47.75
DN29715_c0_g1	244	50.7	9	14.2	DN29715_c0_g1_i1	244	50.74	9	14.2	100
DN31994_c0_g1	220	33.9	6	14.2	DN31994_c0_g1_i1	220	33.9	6	14.17	100
DN9411_c0_g1	221	34.5	6	13.9	DN9411_c0_g1_i1	221	34.54	6	13.91	100
DN42735_c0_g1	212	29.1	5	13.8	DN42735_c0_g1_i1	212	29.05	5	13.78	100
DN24489_c0_g1	223	35.8	6	13.4	DN24489_c0_g1_i1	223	35.82	6	13.41	100
DN29367_c0_g1	203	24.1	4	13.3	DN29367_c0_g1_i1	203	24.07	4	13.31	100
DN35476_c0_g1	203	24.1	4	13.3	DN35476_c0_g1_i1	203	24.07	4	13.31	100
DN3751_c0_g1	375	176	29	13.2	DN3751_c0_g1_i1	375	176	29	13.19	100
DN13508_c0_g1	204	24.6	4	13	DN13508_c0_g1_i1	204	24.6	4	13.02	100
DN21787_c0_g1	204	24.6	4	13	DN21787_c0_g1_i1	204	24.6	4	13.02	100
DN29195_c0_g1	204	24.6	4	13	DN29195_c0_g1_i1	204	24.6	4	13.02	100
DN35297_c0_g1	204	24.6	4	13	DN35297_c0_g1_i1	204	24.6	4	13.02	100
DN43087_c0_g1	215	30.8	5	13	DN43087_c0_g1_i1	215	30.82	5	12.99	100
DN4071_c0_g1	249	55.8	9	12.9	DN4071_c0_g1_i1	258	62.02	8	10.33	79.9
DN18058_c0_g1	226	37.8	6	12.7	DN18058_c0_g1_i1	226	37.8	6	12.71	100
DN2232_c0_g1	388	189	30	12.7	DN2232_c0_g1_i1	388	189	30	12.71	100
DN37560_c0_g1	376	177	28	12.7	DN37560_c0_g1_i1	376	177	28	12.67	100
DN8707_c0_g1	205	25.1	4	12.7	DN8707_c0_g1_i1	205	25.13	4	12.74	100
DN19921_c0_g1	268	70.7	11	12.5	DN19921_c0_g1_i1	268	70.66	11	12.47	100
DN35881_c0_g1	217	32	5	12.5	DN35881_c0_g1_i1	217	32.04	5	12.5	100
DN49442_c0_g1	227	38.5	6	12.5	DN49442_c0_g1_i1	227	38.47	6	12.49	100
DN6462_c0_g1	206	25.7	4	12.5	DN6462_c0_g1_i1	206	25.67	4	12.48	100
DN22644_c0_g1	245	51.5	8	12.4	DN22644_c0_g1_i1	245	51.51	8	12.44	100
DN10147_c0_g1	228	39.1	6	12.3	DN10147_c0_g1_i1	228	39.14	6	12.27	100
DN45197_c0_g1	218	32.7	5	12.3	DN45197_c0_g1_i1	218	32.65	5	12.26	100
DN46807_c0_g1	228	39.1	6	12.3	DN46807_c0_g1_i1	228	39.14	6	12.27	100
DN20492_c0_g1	207	26.2	4	12.2	DN20492_c0_g1_i1	207	26.22	4	12.22	100
DN21552_c0_g1	343	144	22	12.2	DN21552_c0_g1_i1	343	144	22	12.23	100
DN32779_c0_g1	207	26.2	4	12.2	DN32779_c0_g1_i1	207	26.22	4	12.22	100
DN46266_c0_g1	207	26.2	4	12.2	DN46266_c0_g1_i1	207	26.22	4	12.22	100
DN49780_c0_g1	207	26.2	4	12.2	DN49780_c0_g1_i1	207	26.22	4	12.22	100
DN6615_c0_g1	207	26.2	4	12.2	DN6615_c0_g1_i1	207	26.22	4	12.22	100
DN8818_c0_g1	217	32.8	5	12.2	DN8818_c0_g1_i2	211	28.47	3.7	10.4	85.24
DN656_c0_g1	229	39.8	6	12.1	DN656_c0_g1_i1	229	39.82	6	12.06	100
DN10170_c0_g1	218	33.2	5	12.1	DN10170_c0_g1_i1	212	29.05	3.17	8.73	72.38
DN16304_c0_g1	219	33.3	5	12	DN16304_c0_g1_i1	219	33.27	5	12.03	100
DN14719_c0_g1	230	40.5	6	11.9	DN14719_c0_g1_i1	230	40.51	6	11.86	100
DN19644_c0_g1	230	40.5	6	11.9	DN19644_c0_g1_i1	230	40.51	6	11.86	100
DN37138_c0_g1	248	53.9	8	11.9	DN37138_c0_g1_i1	248	53.86	8	11.89	100
DN8599_c0_g1	292	94.5	14	11.9	DN8599_c0_g1_i1	254	58.7	4.67	6.37	53.69
DN1097_c0_g1	220	33.9	5	11.8	DN1097_c0_g1_i1	220	33.9	5	11.81	100
DN15171_c0_g1	231	41.2	6	11.7	DN15171_c0_g1_i1	231	41.21	6	11.66	100
DN17908_c0_g1	509	310	45	11.6	DN17908_c0_g1_i1	509	310	45	11.62	100
DN26428_c0_g1	303	104	15	11.6	DN26428_c0_g1_i1	303	104	15	11.55	100
DN5320_c0_g1	221	34.5	5	11.6	DN5320_c0_g1_i1	221	34.54	5	11.59	100
DN12337_c0_g1	210	27.9	4	11.5	DN12337_c0_g1_i1	210	27.9	4	11.48	100
DN9380_c0_g1	210	27.9	4	11.5	DN9380_c0_g1_i1	210	27.9	4	11.48	100
DN963_c0_g1	267	69.8	10	11.5	DN963_c0_g1_i1	267	69.78	10	11.48	100
DN13140_c0_g1	211	28.5	4	11.3	DN13140_c0_g1_i1	211	28.47	4	11.25	100
DN13736_c0_g1	211	28.5	4	11.3	DN13736_c0_g1_i1	211	28.47	4	11.25	100
DN14325_c0_g1	211	28.5	4	11.3	DN14325_c0_g1_i1	211	28.47	4	11.25	100
DN47977_c0_g1	211	28.5	4	11.3	DN47977_c0_g1_i1	211	28.47	4	11.25	100
DN25955_c0_g1	224	36.5	5	11	DN25955_c0_g1_i1	224	36.47	5	10.98	100
DN34467_c0_g1	271	73.3	10	10.9	DN34467_c0_g1_i1	271	73.34	10	10.92	100
DN42500_c0_g1	235	44	6	10.9	DN42500_c0_g1_i1	235	44.04	6	10.91	100
DN19272_c0_g1	369	170	23	10.8	DN19272_c0_g1_i1	369	170	23	10.83	100
DN22169_c0_g1	213	29.6	4	10.8	DN22169_c0_g1_i1	213	29.64	4	10.81	100
DN23909_c0_g1	225	37.1	5	10.8	DN23909_c0_g1_i1	225	37.13	5	10.78	100
DN24910_c0_g1	225	37.1	5	10.8	DN24910_c0_g1_i1	225	37.13	5	10.78	100
DN34895_c0_g1	213	29.6	4	10.8	DN34895_c0_g1_i1	213	29.64	4	10.81	100
DN14231_c0_g1	246	52.3	7	10.7	DN14231_c0_g1_i1	246	52.29	7	10.72	100
DN21601_c0_g1	246	52.3	7	10.7	DN21601_c0_g1_i1	246	52.29	7	10.72	100
DN34953_c0_g1	393	194	26	10.7	DN34953_c0_g1_i1	393	194	26	10.73	100
DN37860_c0_g1	214	30.2	4	10.6	DN37860_c0_g1_i1	214	30.23	4	10.6	100
DN42357_c0_g1	328	129	17	10.6	DN42357_c0_g1_i1	328	129	17	10.55	100
DN2601_c0_g1	246	52.7	7	10.6	DN2601_c0_g1_i1	243	49.97	4.9	7.85	73.82
DN4706_c0_g1	213	30.3	4	10.6	DN4706_c0_g1_i1	207	26.22	2.6	7.95	75.21
DN21174_c0_g1	266	68.9	9	10.5	DN21174_c0_g1_i1	266	68.9	9	10.46	100
DN10685_c0_g1	215	30.8	4	10.4	DN10685_c0_g1_i1	215	30.82	4	10.39	100
DN21493_c0_g1	227	38.5	5	10.4	DN21493_c0_g1_i1	227	38.47	5	10.41	100
DN40931_c0_g1	201	23	3	10.4	DN40931_c0_g1_i1	201	23.03	3	10.43	100
DN41163_c0_g1	201	23	3	10.4	DN41163_c0_g1_i1	201	23.03	3	10.43	100
DN29626_c0_g1	308	109	14	10.3	DN29626_c0_g1_i1	308	109	14	10.28	100
DN48385_c0_g1	370	171	22	10.3	DN48385_c0_g1_i1	370	171	22	10.3	100
DN34584_c0_g1	216	31.4	4	10.2	DN34584_c0_g1_i1	216	31.43	4	10.19	100
DN35968_c0_g1	202	23.6	3	10.2	DN35968_c0_g1_i1	202	23.55	3	10.2	100
DN39362_c0_g1	202	23.6	3	10.2	DN39362_c0_g1_i1	202	23.55	3	10.2	100
DN6301_c0_g1	301	102	13	10.2	DN6301_c0_g1_i1	301	102	13	10.21	100
DN26435_c0_g1	260	63.7	8	10.1	DN26435_c0_g1_i1	260	63.71	8	10.05	100
DN49307_c0_g1	229	39.8	5	10.1	DN49307_c0_g1_i1	229	39.82	5	10.05	100
DN10152_c1_g1	217	32	4	10	DN10152_c1_g1_i1	217	32.04	4	10	100
DN27030_c0_g1	203	24.1	3	10	DN27030_c0_g1_i1	203	24.07	3	9.98	100
DN29070_c0_g1	278	79.7	10	10	DN29070_c0_g1_i1	278	79.74	10	10.04	100
DN32712_c0_g1	217	32	4	10	DN32712_c0_g1_i1	217	32.04	4	10	100
DN42292_c0_g1	203	24.1	3	10	DN42292_c0_g1_i1	203	24.07	3	9.98	100
DN4806_c0_g1	230	40.5	5	9.9	DN4806_c0_g1_i1	230	40.51	5	9.88	100
DN7241_c0_g1	352	153	19	9.9	DN7241_c0_g1_i1	352	153	19	9.94	100
DN29837_c0_g1	218	32.7	4	9.8	DN29837_c0_g1_i1	218	32.65	4	9.81	100
DN33450_c0_g1	204	24.6	3	9.8	DN33450_c0_g1_i1	204	24.6	3	9.77	100
DN42416_c0_g1	204	24.6	3	9.8	DN42416_c0_g1_i1	204	24.6	3	9.77	100
DN24988_c0_g1	253	57.9	7	9.7	DN24988_c0_g1_i1	253	57.88	7	9.68	100
DN29244_c0_g1	231	41.2	5	9.7	DN29244_c0_g1_i1	231	41.21	5	9.72	100
DN1867_c0_g1	205	25.1	3	9.6	DN1867_c0_g1_i1	205	25.13	3	9.56	100
DN37395_c0_g1	205	25.1	3	9.6	DN37395_c0_g1_i1	205	25.13	3	9.56	100
DN4454_c0_g1	254	58.7	7	9.6	DN4454_c0_g1_i1	254	58.7	7	9.55	100
DN4612_c0_g1	219	33.3	4	9.6	DN4612_c0_g1_i1	219	33.27	4	9.63	100
DN6857_c0_g2	254	58.7	7	9.6	DN6857_c0_g2_i2	254	58.7	7	9.55	100
DN10568_c0_g2	220	33.9	4	9.5	DN10568_c0_g2_i1	220	33.9	4	9.45	100
DN23369_c0_g1	220	33.9	4	9.5	DN23369_c0_g1_i1	220	33.9	4	9.45	100
DN7649_c0_g1	220	33.9	4	9.5	DN7649_c0_g1_i1	215	30.82	2.76	7.16	75.7
DN42134_c0_g1	206	25.7	3	9.4	DN42134_c0_g1_i1	206	25.67	3	9.36	100
DN42508_c0_g1	206	25.7	3	9.4	DN42508_c0_g1_i1	206	25.67	3	9.36	100
DN9482_c0_g1	206	25.7	3	9.4	DN9482_c0_g1_i1	206	25.67	3	9.36	100
DN6398_c0_g1	230	42.6	5	9.4	DN6398_c0_g1_i1	213	29.64	2.45	6.61	70.32
DN47974_c0_g1	221	34.5	4	9.3	DN47974_c0_g1_i1	221	34.54	4	9.27	100
DN27054_c0_g1	234	43.3	5	9.2	DN27054_c0_g1_i1	234	43.32	5	9.24	100
DN41846_c0_g1	268	70.7	8	9.1	DN41846_c0_g1_i1	268	70.66	8	9.07	100
DN438_c0_g1	221	35.3	4	9.1	DN438_c0_g1_i2	214	30.23	2.76	7.31	80.53
DN8989_c0_g1	231	44.2	5	9.1	DN8989_c0_g1_i5	207	26.22	1	3.05	33.7
DN20429_c0_g1	208	26.8	3	9	DN20429_c0_g1_i1	208	26.77	3	8.97	100
DN25200_c0_g1	208	26.8	3	9	DN25200_c0_g1_i1	208	26.77	3	8.97	100
DN28600_c0_g1	208	26.8	3	9	DN28600_c0_g1_i1	208	26.77	3	8.97	100
DN31728_c0_g1	208	26.8	3	9	DN31728_c0_g1_i1	208	26.77	3	8.97	100
DN33522_c0_g1	208	26.8	3	9	DN33522_c0_g1_i1	208	26.77	3	8.97	100
DN12615_c0_g1	259	62.9	7	8.9	DN12615_c0_g1_i1	259	62.86	7	8.92	100
DN1958_c0_g1	316	117	13	8.9	DN1958_c0_g1_i1	316	117	13	8.9	100
DN1170_c0_g1	209	27.3	3	8.8	DN1170_c0_g1_i1	209	27.33	3	8.79	100
DN20716_c0_g1	224	36.5	4	8.8	DN20716_c0_g1_i1	224	36.47	4	8.78	100
DN23286_c0_g1	209	27.3	3	8.8	DN23286_c0_g1_i1	209	27.33	3	8.79	100
DN28276_c0_g1	209	27.3	3	8.8	DN28276_c0_g1_i1	209	27.33	3	8.79	100
DN4140_c0_g1	209	27.3	3	8.8	DN4140_c0_g1_i1	209	27.33	3	8.79	100
DN42118_c0_g1	209	27.3	3	8.8	DN42118_c0_g1_i1	209	27.33	3	8.79	100
DN6450_c0_g1	209	27.3	3	8.8	DN6450_c0_g1_i1	209	27.33	3	8.79	100
DN9483_c1_g1	224	36.5	4	8.8	DN9483_c1_g1_i1	224	36.47	4	8.78	100
DN27997_c0_g1	250	55.5	6	8.7	DN27997_c0_g1_i1	250	55.45	6	8.66	100
DN10995_c0_g1	210	27.9	3	8.6	DN10995_c0_g1_i1	210	27.9	3	8.61	100
DN12869_c0_g1	210	27.9	3	8.6	DN12869_c0_g1_i1	210	27.9	3	8.61	100
DN2291_c0_g1	210	27.9	3	8.6	DN2291_c0_g1_i1	210	27.9	3	8.61	100
DN7842_c0_g1	210	27.9	3	8.6	DN7842_c0_g1_i1	210	27.9	3	8.61	100
DN20424_c0_g1	226	37.8	4	8.5	DN20424_c0_g1_i1	226	37.8	4	8.47	100
DN36755_c0_g1	226	37.8	4	8.5	DN36755_c0_g1_i1	226	37.8	4	8.47	100
DN4621_c0_g1	239	47	5	8.5	DN4621_c0_g1_i1	239	46.96	5	8.53	100
DN48223_c0_g1	251	56.3	6	8.5	DN48223_c0_g1_i1	251	56.26	6	8.54	100
DN9680_c0_g1	226	37.8	4	8.5	DN9680_c0_g1_i1	226	37.8	4	8.47	100
DN16957_c0_g1	211	28.5	3	8.4	DN16957_c0_g1_i1	211	28.47	3	8.44	100
DN21316_c0_g1	211	28.5	3	8.4	DN21316_c0_g1_i1	211	28.47	3	8.44	100
DN26333_c0_g1	211	28.5	3	8.4	DN26333_c0_g1_i1	211	28.47	3	8.44	100
DN37811_c0_g1	294	95	10	8.4	DN37811_c0_g1_i1	294	95.04	10	8.43	100
DN40092_c0_g1	240	47.7	5	8.4	DN40092_c0_g1_i1	240	47.71	5	8.39	100
DN10364_c1_g1	263	66.9	7	8.4	DN10364_c1_g1_i1	272	74.24	4.6	4.96	59.18
DN21886_c0_g1	212	29.1	3	8.3	DN21886_c0_g1_i1	212	29.05	3	8.27	100
DN3224_c0_g1	212	29.1	3	8.3	DN3224_c0_g1_i1	212	29.05	3	8.27	100
DN3241_c0_g1	227	38.5	4	8.3	DN3241_c0_g1_i1	227	38.47	4	8.33	100
DN36035_c0_g1	241	48.5	5	8.3	DN36035_c0_g1_i1	241	48.46	5	8.26	100
DN43422_c0_g1	212	29.1	3	8.3	DN43422_c0_g1_i1	212	29.05	3	8.27	100
DN23875_c0_g1	228	39.1	4	8.2	DN23875_c0_g1_i1	228	39.14	4	8.18	100
DN45481_c0_g1	228	39.1	4	8.2	DN45481_c0_g1_i1	228	39.14	4	8.18	100
DN13555_c0_g1	266	68.9	7	8.1	DN13555_c0_g1_i1	266	68.9	7	8.14	100
DN23157_c0_g1	213	29.6	3	8.1	DN23157_c0_g1_i1	213	29.64	3	8.11	100
DN23590_c0_g1	213	29.6	3	8.1	DN23590_c0_g1_i1	213	29.64	3	8.11	100
DN34764_c0_g1	255	59.5	6	8.1	DN34764_c0_g1_i1	255	59.52	6	8.07	100
DN6256_c0_g1	213	29.6	3	8.1	DN6256_c0_g1_i1	213	29.64	3	8.11	100
DN9307_c0_g1	213	29.6	3	8.1	DN9307_c0_g1_i1	213	29.64	3	8.11	100
DN9317_c0_g1	213	29.6	3	8.1	DN9317_c0_g1_i1	213	29.64	3	8.11	100
DN11588_c1_g1	243	50	5	8	DN11588_c1_g1_i1	243	49.97	5	8.01	100
DN16737_c0_g1	214	30.2	3	8	DN16737_c0_g1_i1	214	30.23	3	7.95	100
DN20026_c0_g1	229	39.8	4	8	DN20026_c0_g1_i1	229	39.82	4	8.04	100
DN22383_c0_g1	243	50	5	8	DN22383_c0_g1_i1	243	49.97	5	8.01	100
DN28262_c0_g1	214	30.2	3	8	DN28262_c0_g1_i1	214	30.23	3	7.95	100
DN34448_c0_g1	214	30.2	3	8	DN34448_c0_g1_i1	214	30.23	3	7.95	100
DN5625_c0_g1	390	191	19	8	DN5625_c0_g1_i1	390	191	19	7.97	100
DN2268_c0_g1	230	40.5	4	7.9	DN2268_c0_g1_i1	230	40.51	4	7.91	100
DN33629_c0_g1	257	61.2	6	7.9	DN33629_c0_g1_i1	257	61.18	6	7.85	100
DN10577_c0_g1	242	50.8	5	7.9	DN10577_c0_g1_i2	234	43.32	4	7.39	93.81
DN16412_c0_g1	231	41.2	4	7.8	DN16412_c0_g1_i1	231	41.21	4	7.77	100
DN18163_c0_g1	215	30.8	3	7.8	DN18163_c0_g1_i1	215	30.82	3	7.79	100
DN21480_c0_g1	245	51.5	5	7.8	DN21480_c0_g1_i1	245	51.51	5	7.77	100
DN22805_c0_g1	245	51.5	5	7.8	DN22805_c0_g1_i1	245	51.51	5	7.77	100
DN2473_c0_g1	312	113	11	7.8	DN2473_c0_g1_i1	312	113	11	7.8	100
DN3333_c0_g1	215	30.8	3	7.8	DN3333_c0_g1_i1	215	30.82	3	7.79	100
DN9462_c0_g1	230	40.9	4	7.8	DN9462_c0_g1_i2	223	35.82	2	4.47	57.11
DN20993_c0_g1	270	72.4	7	7.7	DN20993_c0_g1_i1	270	72.44	7	7.74	100
DN10074_c0_g1	216	31.4	3	7.6	DN10074_c0_g1_i1	216	31.43	3	7.64	100
DN26361_c0_g1	216	31.4	3	7.6	DN26361_c0_g1_i1	216	31.43	3	7.64	100
DN33657_c0_g1	347	148	14	7.6	DN33657_c0_g1_i1	347	148	14	7.57	100
DN23803_c0_g1	217	32	3	7.5	DN23803_c0_g1_i1	217	32.04	3	7.5	100
DN28654_c0_g1	295	96	9	7.5	DN28654_c0_g1_i1	295	96.03	9	7.5	100
DN30999_c0_g1	217	32	3	7.5	DN30999_c0_g1_i1	217	32.04	3	7.5	100
DN34555_c0_g1	233	42.6	4	7.5	DN34555_c0_g1_i1	233	42.61	4	7.52	100
DN34714_c0_g1	217	32	3	7.5	DN34714_c0_g1_i1	217	32.04	3	7.5	100
DN47646_c0_g1	233	42.6	4	7.5	DN47646_c0_g1_i1	233	42.61	4	7.52	100
DN10980_c0_g1	306	107	10	7.5	DN10980_c0_g1_i4	311	112	9	6.43	85.94
DN10159_c0_g1	218	32.7	3	7.4	DN10159_c0_g1_i1	218	32.65	3	7.36	100
DN22749_c0_g1	218	32.7	3	7.4	DN22749_c0_g1_i1	218	32.65	3	7.36	100
DN33878_c0_g1	297	98	9	7.4	DN33878_c0_g1_i1	297	98.01	9	7.35	100
DN35600_c0_g1	218	32.7	3	7.4	DN35600_c0_g1_i1	218	32.65	3	7.36	100
DN49367_c0_g1	218	32.7	3	7.4	DN49367_c0_g1_i1	218	32.65	3	7.36	100
DN14137_c0_g1	235	44	4	7.3	DN14137_c0_g1_i1	235	44.04	4	7.27	100
DN14142_c0_g1	235	44	4	7.3	DN14142_c0_g1_i1	235	44.04	4	7.27	100
DN9492_c0_g2	331	132	12	7.3	DN9492_c0_g2_i1	331	132	12	7.28	100
DN34524_c0_g1	233	44.1	4	7.3	DN34524_c0_g1_i2	222	35.18	2.52	5.73	78.76
DN10227_c1_g1	219	33.3	3	7.2	DN10227_c1_g1_i1	219	33.27	3	7.22	100
DN11308_c1_g1	602	403	36	7.2	DN11308_c1_g1_i1	602	403	36	7.15	100
DN16104_c0_g1	219	33.3	3	7.2	DN16104_c0_g1_i1	219	33.27	3	7.22	100
DN6123_c0_g1	219	33.3	3	7.2	DN6123_c0_g1_i1	219	33.27	3	7.22	100
DN19249_c0_g1	289	90.2	8	7.1	DN19249_c0_g1_i1	289	90.17	8	7.1	100
DN28171_c0_g1	220	33.9	3	7.1	DN28171_c0_g1_i1	220	33.9	3	7.09	100
DN28980_c0_g1	251	56.3	5	7.1	DN28980_c0_g1_i1	251	56.26	5	7.12	100
DN2903_c0_g1	251	56.3	5	7.1	DN2903_c0_g1_i1	251	56.26	5	7.12	100
DN7500_c0_g1	218	34	3	7.1	DN7500_c0_g1_i2	207	26.22	1.75	5.34	75.48
DN9693_c0_g1	249	56.7	5	7.1	DN9693_c0_g1_i3	248	53.86	1.91	2.83	40.1
DN11336_c0_g1	290	91.1	8	7	DN11336_c0_g1_i1	290	91.14	8	7.03	100
DN22943_c0_g1	237	45.5	4	7	DN22943_c0_g1_i1	237	45.49	4	7.04	100
DN25748_c0_g1	237	45.5	4	7	DN25748_c0_g1_i1	237	45.49	4	7.04	100
DN28492_c0_g1	221	34.5	3	7	DN28492_c0_g1_i1	221	34.54	3	6.96	100
DN29129_c0_g1	266	68.9	6	7	DN29129_c0_g1_i1	266	68.9	6	6.97	100
DN41961_c0_g1	221	34.5	3	7	DN41961_c0_g1_i1	221	34.54	3	6.96	100
DN4236_c0_g1	201	23	2	7	DN4236_c0_g1_i1	201	23.03	2	6.95	100
DN44198_c0_g1	529	330	29	7	DN44198_c0_g1_i1	529	330	29	7.04	100
DN46642_c0_g1	221	34.5	3	7	DN46642_c0_g1_i1	221	34.54	3	6.96	100
DN5517_c0_g1	201	23	2	7	DN5517_c0_g1_i1	201	23.03	2	6.95	100
DN5692_c0_g1	201	23	2	7	DN5692_c0_g1_i1	201	23.03	2	6.95	100
DN7688_c0_g1	201	23	2	7	DN7688_c0_g1_i1	201	23.03	2	6.95	100
DN8051_c0_g1	201	23	2	7	DN8051_c0_g1_i1	201	23.03	2	6.95	100
DN845_c1_g1	201	23	2	7	DN845_c1_g1_i1	201	23.03	2	6.95	100
DN29020_c0_g1	238	46.2	4	6.9	DN29020_c0_g1_i1	238	46.22	4	6.93	100
DN38948_c0_g1	267	69.8	6	6.9	DN38948_c0_g1_i1	267	69.78	6	6.89	100
DN48431_c0_g1	238	46.2	4	6.9	DN48431_c0_g1_i1	238	46.22	4	6.93	100
DN10066_c1_g1	305	106	9	6.8	DN10066_c1_g1_i2	305	106	9	6.8	100
DN119_c0_g1	459	260	22	6.8	DN119_c0_g1_i1	459	260	22	6.78	100
DN1985_c0_g1	202	23.6	2	6.8	DN1985_c0_g1_i1	202	23.55	2	6.8	100
DN20880_c0_g1	222	35.2	3	6.8	DN20880_c0_g1_i1	222	35.18	3	6.83	100
DN23443_c0_g1	239	47	4	6.8	DN23443_c0_g1_i1	239	46.96	4	6.82	100
DN25998_c0_g1	202	23.6	2	6.8	DN25998_c0_g1_i1	202	23.55	2	6.8	100
DN3919_c0_g1	202	23.6	2	6.8	DN3919_c0_g1_i1	202	23.55	2	6.8	100
DN41095_c0_g1	202	23.6	2	6.8	DN41095_c0_g1_i1	202	23.55	2	6.8	100
DN738_c0_g1	202	23.6	2	6.8	DN738_c0_g1_i1	202	23.55	2	6.8	100
DN9974_c0_g1	202	23.6	2	6.8	DN9974_c0_g1_i1	202	23.55	2	6.8	100
DN6871_c0_g1	221	35.5	3	6.8	DN6871_c0_g1_i2	209	27.33	1.75	5.13	75.81
DN18647_c0_g1	367	168	14	6.7	DN18647_c0_g1_i1	367	168	14	6.67	100
DN23697_c0_g1	203	24.1	2	6.7	DN23697_c0_g1_i1	203	24.07	2	6.65	100
DN29265_c0_g1	223	35.8	3	6.7	DN29265_c0_g1_i1	223	35.82	3	6.71	100
DN33842_c0_g1	223	35.8	3	6.7	DN33842_c0_g1_i1	223	35.82	3	6.71	100
DN36009_c0_g1	223	35.8	3	6.7	DN36009_c0_g1_i1	223	35.82	3	6.71	100
DN4754_c0_g1	240	47.7	4	6.7	DN4754_c0_g1_i1	240	47.71	4	6.71	100
DN48846_c0_g1	223	35.8	3	6.7	DN48846_c0_g1_i1	223	35.82	3	6.71	100
DN5970_c0_g1	203	24.1	2	6.7	DN5970_c0_g1_i1	203	24.07	2	6.65	100
DN916_c0_g1	203	24.1	2	6.7	DN916_c0_g1_i1	203	24.07	2	6.65	100
DN41755_c0_g1	256	60.4	5	6.6	DN41755_c0_g1_i1	256	60.35	5	6.63	100
DN46320_c0_g1	241	48.5	4	6.6	DN46320_c0_g1_i1	241	48.46	4	6.61	100
DN47735_c0_g1	224	36.5	3	6.6	DN47735_c0_g1_i1	224	36.47	3	6.59	100
DN10257_c0_g1	203	24.3	2	6.6	DN10257_c0_g1_i1	202	23.55	1	3.4	51.63
DN10957_c0_g3	242	49.2	4	6.5	DN10957_c0_g3_i1	242	49.21	4	6.51	100
DN1121_c0_g1	204	24.6	2	6.5	DN1121_c0_g1_i1	204	24.6	2	6.51	100
DN14092_c0_g1	204	24.6	2	6.5	DN14092_c0_g1_i1	204	24.6	2	6.51	100
DN14509_c0_g1	242	49.2	4	6.5	DN14509_c0_g1_i1	242	49.21	4	6.51	100
DN34833_c0_g1	258	62	5	6.5	DN34833_c0_g1_i1	258	62.02	5	6.46	100
DN49971_c0_g1	225	37.1	3	6.5	DN49971_c0_g1_i1	225	37.13	3	6.47	100
DN1702_c0_g1	224	36.7	3	6.5	DN1702_c0_g1_i1	220	33.9	2	4.72	72.21
DN10568_c0_g3	226	37.8	3	6.4	DN10568_c0_g3_i1	226	37.8	3	6.36	100
DN20855_c0_g1	259	62.9	5	6.4	DN20855_c0_g1_i1	259	62.86	5	6.37	100
DN21204_c0_g1	362	163	13	6.4	DN21204_c0_g1_i1	362	163	13	6.39	100
DN21442_c0_g1	273	75.2	6	6.4	DN21442_c0_g1_i1	273	75.15	6	6.39	100
DN24327_c0_g1	205	25.1	2	6.4	DN24327_c0_g1_i1	205	25.13	2	6.37	100
DN2790_c0_g1	226	37.8	3	6.4	DN2790_c0_g1_i1	226	37.8	3	6.36	100
DN37084_c0_g1	259	62.9	5	6.4	DN37084_c0_g1_i1	259	62.86	5	6.37	100
DN38939_c0_g1	243	50	4	6.4	DN38939_c0_g1_i1	243	49.97	4	6.41	100
DN43403_c0_g1	243	50	4	6.4	DN43403_c0_g1_i1	243	49.97	4	6.41	100
DN47459_c0_g1	205	25.1	2	6.4	DN47459_c0_g1_i1	205	25.13	2	6.37	100
DN5047_c0_g1	205	25.1	2	6.4	DN5047_c0_g1_i1	205	25.13	2	6.37	100
DN10652_c0_g1	227	38.5	3	6.3	DN10652_c0_g1_i1	227	38.47	3	6.25	100
DN18957_c0_g1	260	63.7	5	6.3	DN18957_c0_g1_i1	260	63.71	5	6.28	100
DN20190_c0_g1	313	114	9	6.3	DN20190_c0_g1_i1	313	114	9	6.32	100
DN36558_c0_g1	244	50.7	4	6.3	DN36558_c0_g1_i1	244	50.74	4	6.31	100
DN45273_c0_g1	227	38.5	3	6.3	DN45273_c0_g1_i1	227	38.47	3	6.25	100
DN5931_c0_g1	391	192	15	6.3	DN5931_c0_g1_i1	391	192	15	6.26	100
DN15818_c0_g1	245	51.5	4	6.2	DN15818_c0_g1_i1	245	51.51	4	6.22	100
DN2567_c0_g1	206	25.7	2	6.2	DN2567_c0_g1_i1	206	25.67	2	6.24	100
DN423_c1_g1	206	25.7	2	6.2	DN423_c1_g1_i1	206	25.67	2	6.24	100
DN47179_c0_g1	206	25.7	2	6.2	DN47179_c0_g1_i1	206	25.67	2	6.24	100
DN7185_c0_g1	206	25.7	2	6.2	DN7185_c0_g1_i1	206	25.67	2	6.24	100
DN5068_c0_g1	206	25.7	2	6.2	DN5068_c0_g1_i2	205	25.13	1	3.19	51.06
DN14909_c0_g1	207	26.2	2	6.1	DN14909_c0_g1_i1	207	26.22	2	6.11	100
DN29252_c0_g1	228	39.1	3	6.1	DN29252_c0_g1_i1	228	39.14	3	6.14	100
DN33671_c0_g1	207	26.2	2	6.1	DN33671_c0_g1_i1	207	26.22	2	6.11	100
DN35694_c0_g1	246	52.3	4	6.1	DN35694_c0_g1_i1	246	52.29	4	6.13	100
DN36217_c0_g1	207	26.2	2	6.1	DN36217_c0_g1_i1	207	26.22	2	6.11	100
DN43013_c0_g1	207	26.2	2	6.1	DN43013_c0_g1_i1	207	26.22	2	6.11	100
DN43959_c0_g1	318	119	9	6.1	DN43959_c0_g1_i1	318	119	9	6.06	100
DN47593_c0_g1	435	236	18	6.1	DN47593_c0_g1_i1	435	236	18	6.11	100
DN48322_c0_g1	228	39.1	3	6.1	DN48322_c0_g1_i1	228	39.14	3	6.14	100
DN6953_c0_g1	207	26.2	2	6.1	DN6953_c0_g1_i1	207	26.22	2	6.11	100
DN2216_c0_g1	228	39.4	3	6.1	DN2216_c0_g1_i1	221	34.54	1.61	3.73	61.06
DN31970_c0_g1	207	26.2	2	6.1	DN31970_c0_g1_i1	207	26.22	1	3.05	50
DN16415_c0_g1	229	39.8	3	6	DN16415_c0_g1_i1	229	39.82	3	6.03	100
DN19474_c0_g1	292	93.1	7	6	DN19474_c0_g1_i1	292	93.08	7	6.02	100
DN22955_c0_g1	229	39.8	3	6	DN22955_c0_g1_i1	229	39.82	3	6.03	100
DN28652_c0_g1	247	53.1	4	6	DN28652_c0_g1_i1	247	53.07	4	6.04	100
DN31127_c0_g1	360	161	12	6	DN31127_c0_g1_i1	360	161	12	5.97	100
DN32564_c0_g1	208	26.8	2	6	DN32564_c0_g1_i1	208	26.77	2	5.98	100
DN36925_c0_g1	208	26.8	2	6	DN36925_c0_g1_i1	208	26.77	2	5.98	100
DN39708_c0_g1	229	39.8	3	6	DN39708_c0_g1_i1	229	39.82	3	6.03	100
DN43379_c0_g1	208	26.8	2	6	DN43379_c0_g1_i1	208	26.77	2	5.98	100
DN44497_c0_g1	208	26.8	2	6	DN44497_c0_g1_i1	208	26.77	2	5.98	100
DN46959_c0_g1	208	26.8	2	6	DN46959_c0_g1_i2	208	26.77	2	5.98	100
DN9253_c0_g1	208	26.8	2	6	DN9253_c0_g1_i1	208	26.77	2	5.98	100
DN948_c0_g1	208	26.8	2	6	DN948_c0_g1_i1	208	26.77	2	5.98	100
DN10454_c0_g1	209	27.3	2	5.9	DN10454_c0_g1_i1	209	27.33	2	5.86	100
DN11518_c0_g1	348	149	11	5.9	DN11518_c0_g1_i2	348	149	11	5.91	100
DN21131_c0_g1	265	68	5	5.9	DN21131_c0_g1_i1	265	68.02	5	5.89	100
DN21796_c0_g1	249	54.7	4	5.9	DN21796_c0_g1_i1	249	54.65	4	5.86	100
DN26104_c0_g1	209	27.3	2	5.9	DN26104_c0_g1_i1	209	27.33	2	5.86	100
DN29483_c0_g1	230	40.5	3	5.9	DN29483_c0_g1_i1	230	40.51	3	5.93	100
DN34436_c0_g1	209	27.3	2	5.9	DN34436_c0_g1_i1	209	27.33	2	5.86	100
DN6472_c0_g1	265	68	5	5.9	DN6472_c0_g1_i1	265	68.02	5	5.89	100
DN6735_c0_g1	230	40.5	3	5.9	DN6735_c0_g1_i2	230	40.51	3	5.93	100
DN8853_c0_g1	230	40.5	3	5.9	DN8853_c0_g1_i1	230	40.51	3	5.93	100
DN11025_c0_g1	247	54.6	4	5.9	DN11025_c0_g1_i1	230	40.51	2	3.95	67.33
DN29762_c0_g1	250	55.5	4	5.8	DN29762_c0_g1_i1	250	55.45	4	5.78	100
DN30437_c0_g1	281	82.5	6	5.8	DN30437_c0_g1_i1	281	82.54	6	5.82	100
DN33247_c0_g1	231	41.2	3	5.8	DN33247_c0_g1_i1	231	41.21	3	5.83	100
DN46774_c0_g1	266	68.9	5	5.8	DN46774_c0_g1_i1	266	68.9	5	5.81	100
DN48436_c0_g1	266	68.9	5	5.8	DN48436_c0_g1_i1	266	68.9	5	5.81	100
DN5852_c0_g1	226	41.7	3	5.8	DN5852_c0_g1_i2	213	29.64	2	5.4	93.72
DN20530_c0_g1	232	41.9	3	5.7	DN20530_c0_g1_i1	232	41.9	3	5.73	100
DN20868_c0_g1	268	70.7	5	5.7	DN20868_c0_g1_i1	268	70.66	5	5.67	100
DN2304_c0_g1	232	41.9	3	5.7	DN2304_c0_g1_i1	232	41.9	3	5.73	100
DN25507_c0_g1	210	27.9	2	5.7	DN25507_c0_g1_i1	210	27.9	2	5.74	100
DN30230_c0_g1	267	69.8	5	5.7	DN30230_c0_g1_i1	267	69.78	5	5.74	100
DN31120_c0_g1	251	56.3	4	5.7	DN31120_c0_g1_i1	251	56.26	4	5.69	100
DN36538_c0_g1	251	56.3	4	5.7	DN36538_c0_g1_i1	251	56.26	4	5.69	100
DN36587_c0_g1	210	27.9	2	5.7	DN36587_c0_g1_i1	210	27.9	2	5.74	100
DN39972_c0_g1	210	27.9	2	5.7	DN39972_c0_g1_i1	210	27.9	2	5.74	100
DN42992_c0_g1	210	27.9	2	5.7	DN42992_c0_g1_i1	210	27.9	2	5.74	100
DN44833_c0_g1	268	70.7	5	5.7	DN44833_c0_g1_i1	268	70.66	5	5.67	100
DN48261_c0_g1	232	41.9	3	5.7	DN48261_c0_g1_i1	232	41.9	3	5.73	100
DN21129_c0_g1	234	43.3	3	5.6	DN21129_c0_g1_i1	234	43.32	3	5.55	100
DN23213_c0_g1	211	28.5	2	5.6	DN23213_c0_g1_i1	211	28.47	2	5.62	100
DN2693_c0_g1	211	28.5	2	5.6	DN2693_c0_g1_i1	211	28.47	2	5.62	100
DN3620_c0_g1	211	28.5	2	5.6	DN3620_c0_g1_i1	211	28.47	2	5.62	100
DN40042_c0_g1	234	43.3	3	5.6	DN40042_c0_g1_i1	234	43.32	3	5.55	100
DN48388_c0_g1	252	57.1	4	5.6	DN48388_c0_g1_i1	252	57.06	4	5.61	100
DN49661_c0_g1	211	28.5	2	5.6	DN49661_c0_g1_i1	211	28.47	2	5.62	100
DN7992_c0_g1	211	28.5	2	5.6	DN7992_c0_g1_i1	211	28.47	2	5.62	100
DN9093_c0_g1	234	43.3	3	5.6	DN9093_c0_g1_i1	234	43.32	3	5.55	100
DN6487_c0_g1	232	42.8	3	5.6	DN6487_c0_g1_i1	222	35.18	2	4.55	81.03
DN8808_c0_g1	269	71.5	5	5.6	DN8808_c0_g1_i2	262	65.42	1.69	2.06	36.85
DN11790_c0_g1	271	73.3	5	5.5	DN11790_c0_g1_i1	271	73.34	5	5.46	100
DN42219_c0_g1	270	72.4	5	5.5	DN42219_c0_g1_i1	270	72.44	5	5.53	100
DN42748_c0_g1	254	58.7	4	5.5	DN42748_c0_g1_i1	254	58.7	4	5.46	100
DN50086_c0_g1	212	29.1	2	5.5	DN50086_c0_g1_i1	212	29.05	2	5.51	100
DN5868_c0_g1	235	44	3	5.5	DN5868_c0_g1_i1	235	44.04	3	5.46	100
DN7780_c0_g1	212	29.1	2	5.5	DN7780_c0_g1_i1	212	29.05	2	5.51	100
DN16097_c0_g2	236	44.8	3	5.4	DN16097_c0_g2_i1	236	44.76	3	5.37	100
DN45475_c0_g1	287	88.2	6	5.4	DN45475_c0_g1_i1	287	88.24	6	5.44	100
DN50059_c0_g1	213	29.6	2	5.4	DN50059_c0_g1_i1	213	29.64	2	5.4	100
DN15881_c0_g1	237	45.5	3	5.3	DN15881_c0_g1_i1	237	45.49	3	5.28	100
DN27943_c0_g1	237	45.5	3	5.3	DN27943_c0_g1_i1	237	45.49	3	5.28	100
DN29933_c0_g1	256	60.4	4	5.3	DN29933_c0_g1_i1	256	60.35	4	5.31	100
DN30625_c0_g1	214	30.2	2	5.3	DN30625_c0_g1_i1	214	30.23	2	5.3	100
DN34888_c0_g1	274	76.1	5	5.3	DN34888_c0_g1_i1	274	76.06	5	5.26	100
DN36531_c0_g1	214	30.2	2	5.3	DN36531_c0_g1_i1	214	30.23	2	5.3	100
DN36659_c0_g1	214	30.2	2	5.3	DN36659_c0_g1_i1	214	30.23	2	5.3	100
DN43134_c0_g1	214	30.2	2	5.3	DN43134_c0_g1_i1	214	30.23	2	5.3	100
DN49593_c0_g1	214	30.2	2	5.3	DN49593_c0_g1_i1	214	30.23	2	5.3	100
DN5395_c0_g1	237	45.8	3	5.3	DN5395_c0_g1_i1	235	44.04	1.53	2.78	52.93
DN13343_c0_g1	238	46.2	3	5.2	DN13343_c0_g1_i1	238	46.22	3	5.2	100
DN22039_c0_g1	215	30.8	2	5.2	DN22039_c0_g1_i1	215	30.82	2	5.2	100
DN36745_c0_g1	215	30.8	2	5.2	DN36745_c0_g1_i1	215	30.82	2	5.2	100
DN3755_c0_g1	215	30.8	2	5.2	DN3755_c0_g1_i1	215	30.82	2	5.2	100
DN43308_c0_g1	257	61.2	4	5.2	DN43308_c0_g1_i1	257	61.18	4	5.24	100
DN49476_c0_g1	238	46.2	3	5.2	DN49476_c0_g1_i1	238	46.22	3	5.2	100
DN49644_c0_g1	215	30.8	2	5.2	DN49644_c0_g1_i1	215	30.82	2	5.2	100
DN5696_c0_g1	258	62	4	5.2	DN5696_c0_g1_i1	258	62.02	4	5.16	100
DN15159_c0_g1	216	31.4	2	5.1	DN15159_c0_g1_i1	216	31.43	2	5.1	100
DN2630_c0_g1	216	31.4	2	5.1	DN2630_c0_g1_i1	216	31.43	2	5.1	100
DN28932_c0_g1	216	31.4	2	5.1	DN28932_c0_g1_i1	216	31.43	2	5.1	100
DN3631_c0_g1	216	31.4	2	5.1	DN3631_c0_g1_i1	216	31.43	2	5.1	100
DN40721_c0_g1	259	62.9	4	5.1	DN40721_c0_g1_i1	259	62.86	4	5.1	100
DN4301_c0_g1	325	126	8	5.1	DN4301_c0_g1_i1	325	126	8	5.08	100
DN4535_c0_g2	239	47	3	5.1	DN4535_c0_g2_i1	239	46.96	3	5.12	100
DN47070_c0_g1	216	31.4	2	5.1	DN47070_c0_g1_i1	216	31.43	2	5.1	100
DN48210_c0_g1	239	47	3	5.1	DN48210_c0_g1_i1	239	46.96	3	5.12	100
DN8895_c0_g1	216	31.4	2	5.1	DN8895_c0_g1_i1	216	31.43	2	5.1	100
DN11279_c1_g1	241	48.5	3	5	DN11279_c1_g1_i1	241	48.46	3	4.96	100
DN21565_c0_g1	217	32	2	5	DN21565_c0_g1_i1	217	32.04	2	5	100
DN2582_c0_g1	217	32	2	5	DN2582_c0_g1_i1	217	32.04	2	5	100
DN26599_c0_g1	240	47.7	3	5	DN26599_c0_g1_i1	240	47.71	3	5.04	100
DN28889_c0_g1	240	47.7	3	5	DN28889_c0_g1_i1	240	47.71	3	5.04	100
DN40599_c0_g1	217	32	2	5	DN40599_c0_g1_i1	217	32.04	2	5	100
DN43027_c0_g1	240	47.7	3	5	DN43027_c0_g1_i1	240	47.71	3	5.04	100
DN48251_c0_g1	217	32	2	5	DN48251_c0_g1_i1	217	32.04	2	5	100
DN13930_c0_g1	218	32.7	2	4.9	DN13930_c0_g1_i1	218	32.65	2	4.9	100
DN21369_c0_g1	218	32.7	2	4.9	DN21369_c0_g1_i1	218	32.65	2	4.9	100
DN39912_c0_g1	242	49.2	3	4.9	DN39912_c0_g1_i1	242	49.21	3	4.88	100
DN41085_c0_g1	363	164	10	4.9	DN41085_c0_g1_i1	363	164	10	4.88	100
DN45336_c0_g1	242	49.2	3	4.9	DN45336_c0_g1_i1	242	49.21	3	4.88	100
DN4744_c0_g1	218	32.7	2	4.9	DN4744_c0_g1_i1	218	32.65	2	4.9	100
DN49460_c0_g1	262	65.4	4	4.9	DN49460_c0_g1_i1	262	65.42	4	4.9	100
DN14603_c0_g1	243	50	3	4.8	DN14603_c0_g1_i1	243	49.97	3	4.81	100
DN33449_c0_g1	219	33.3	2	4.8	DN33449_c0_g1_i1	219	33.27	2	4.81	100
DN36916_c0_g1	243	50	3	4.8	DN36916_c0_g1_i1	243	49.97	3	4.81	100
DN47934_c0_g1	264	67.2	4	4.8	DN47934_c0_g1_i1	264	67.15	4	4.77	100
DN5466_c0_g1	219	33.3	2	4.8	DN5466_c0_g1_i1	219	33.27	2	4.81	100
DN10780_c1_g4	804	605	36	4.8	DN10780_c1_g4_i1	806	607	29.52	3.89	81.72
DN10584_c1_g1	354	155	9	4.7	DN10584_c1_g1_i1	354	155	9	4.65	100
DN18453_c0_g1	245	51.5	3	4.7	DN18453_c0_g1_i1	245	51.51	3	4.66	100
DN22508_c0_g1	245	51.5	3	4.7	DN22508_c0_g1_i1	245	51.51	3	4.66	100
DN30241_c0_g1	220	33.9	2	4.7	DN30241_c0_g1_i1	220	33.9	2	4.72	100
DN43014_c0_g1	220	33.9	2	4.7	DN43014_c0_g1_i1	220	33.9	2	4.72	100
DN45391_c0_g1	266	68.9	4	4.7	DN45391_c0_g1_i1	266	68.9	4	4.65	100
DN6747_c0_g1	220	33.9	2	4.7	DN6747_c0_g1_i1	220	33.9	2	4.72	100
DN6938_c0_g1	220	33.9	2	4.7	DN6938_c0_g1_i1	220	33.9	2	4.72	100
DN6966_c0_g1	245	51.5	3	4.7	DN6966_c0_g1_i1	245	51.51	3	4.66	100
DN7616_c0_g1	220	33.9	2	4.7	DN7616_c0_g1_i1	220	33.9	2	4.72	100
DN20232_c0_g1	242	51.7	3	4.7	DN20232_c0_g1_i2	228	39.14	2	4.09	88.04
DN10264_c0_g1	221	34.5	2	4.6	DN10264_c0_g1_i1	221	34.54	2	4.64	100
DN25516_c0_g1	339	140	8	4.6	DN25516_c0_g1_i1	339	140	8	4.58	100
DN26765_c0_g1	246	52.3	3	4.6	DN26765_c0_g1_i1	246	52.29	3	4.59	100
DN28529_c0_g1	222	35.2	2	4.6	DN28529_c0_g1_i1	222	35.18	2	4.55	100
DN50112_c0_g1	221	34.5	2	4.6	DN50112_c0_g1_i1	221	34.54	2	4.64	100
DN5439_c1_g1	222	35.2	2	4.6	DN5439_c1_g1_i1	222	35.18	2	4.55	100
DN5719_c0_g1	222	35.2	2	4.6	DN5719_c0_g1_i1	222	35.18	2	4.55	100
DN7525_c0_g1	221	34.5	2	4.6	DN7525_c0_g1_i1	221	34.54	2	4.64	100
DN977_c0_g2	222	35.2	2	4.6	DN977_c0_g2_i1	222	35.18	2	4.55	100
DN23206_c0_g1	223	35.8	2	4.5	DN23206_c0_g1_i1	223	35.82	2	4.47	100
DN24841_c0_g1	269	71.6	4	4.5	DN24841_c0_g1_i1	269	71.55	4	4.48	100
DN27818_c0_g1	324	125	7	4.5	DN27818_c0_g1_i1	324	125	7	4.48	100
DN28105_c0_g1	248	53.9	3	4.5	DN28105_c0_g1_i1	248	53.86	3	4.46	100
DN32523_c0_g1	268	70.7	4	4.5	DN32523_c0_g1_i1	268	70.66	4	4.53	100
DN34473_c0_g1	288	89.2	5	4.5	DN34473_c0_g1_i1	288	89.2	5	4.49	100
DN36879_c0_g1	223	35.8	2	4.5	DN36879_c0_g1_i1	223	35.82	2	4.47	100
DN42864_c0_g1	247	53.1	3	4.5	DN42864_c0_g1_i1	247	53.07	3	4.53	100
DN7857_c0_g1	248	53.9	3	4.5	DN7857_c0_g1_i1	248	53.86	3	4.46	100
DN17307_c0_g1	243	52.9	3	4.5	DN17307_c0_g1_i2	215	30.82	1	2.6	57.24
DN26594_c0_g1	249	54.7	3	4.4	DN26594_c0_g1_i1	249	54.65	3	4.4	100
DN33447_c0_g1	327	128	7	4.4	DN33447_c0_g1_i1	327	128	7	4.38	100
DN35302_c0_g1	224	36.5	2	4.4	DN35302_c0_g1_i1	224	36.47	2	4.39	100
DN3893_c0_g1	399	200	11	4.4	DN3893_c0_g1_i1	399	200	11	4.4	100
DN40793_c0_g1	249	54.7	3	4.4	DN40793_c0_g1_i1	249	54.65	3	4.4	100
DN8349_c1_g1	271	73.3	4	4.4	DN8349_c1_g1_i1	271	73.34	4	4.37	100
DN15980_c0_g1	292	93.1	5	4.3	DN15980_c0_g1_i1	292	93.08	5	4.3	100
DN19547_c0_g1	331	132	7	4.3	DN19547_c0_g1_i1	331	132	7	4.25	100
DN23757_c0_g1	225	37.1	2	4.3	DN23757_c0_g1_i1	225	37.13	2	4.31	100
DN26079_c0_g1	348	149	8	4.3	DN26079_c0_g1_i1	348	149	8	4.3	100
DN30243_c0_g1	225	37.1	2	4.3	DN30243_c0_g1_i1	225	37.13	2	4.31	100
DN32458_c0_g1	310	111	6	4.3	DN32458_c0_g1_i1	310	111	6	4.33	100
DN32596_c0_g1	250	55.5	3	4.3	DN32596_c0_g1_i1	250	55.45	3	4.33	100
DN34867_c0_g1	250	55.5	3	4.3	DN34867_c0_g1_i1	250	55.45	3	4.33	100
DN3489_c0_g1	225	37.1	2	4.3	DN3489_c0_g1_i1	225	37.13	2	4.31	100
DN36233_c0_g1	312	113	6	4.3	DN36233_c0_g1_i1	312	113	6	4.25	100
DN39778_c0_g1	272	74.2	4	4.3	DN39778_c0_g1_i1	272	74.24	4	4.31	100
DN40831_c0_g1	225	37.1	2	4.3	DN40831_c0_g1_i1	225	37.13	2	4.31	100
DN41984_c0_g1	225	37.1	2	4.3	DN41984_c0_g1_i1	225	37.13	2	4.31	100
DN45533_c0_g1	311	112	6	4.3	DN45533_c0_g1_i1	311	112	6	4.29	100
DN47467_c0_g1	250	55.5	3	4.3	DN47467_c0_g1_i1	250	55.45	3	4.33	100
DN630_c0_g1	251	56.3	3	4.3	DN630_c0_g1_i1	251	56.26	3	4.27	100
DN9447_c0_g1	251	56.3	3	4.3	DN9447_c0_g1_i1	251	56.26	3	4.27	100
DN10533_c0_g1	224	37	2	4.3	DN10533_c0_g1_i3	212	29.05	1	2.76	63.59
DN11420_c1_g1	274	76.1	4	4.2	DN11420_c1_g1_i1	274	76.06	4	4.21	100
DN20892_c0_g1	253	57.9	3	4.2	DN20892_c0_g1_i1	253	57.88	3	4.15	100
DN27677_c0_g1	227	38.5	2	4.2	DN27677_c0_g1_i1	227	38.47	2	4.16	100
DN35529_c0_g1	227	38.5	2	4.2	DN35529_c0_g1_i1	227	38.47	2	4.16	100
DN40362_c0_g1	227	38.5	2	4.2	DN40362_c0_g1_i1	227	38.47	2	4.16	100
DN4996_c0_g1	390	191	10	4.2	DN4996_c0_g1_i1	390	191	10	4.19	100
DN50213_c0_g1	226	37.8	2	4.2	DN50213_c0_g1_i1	226	37.8	2	4.24	100
DN16373_c0_g1	228	39.1	2	4.1	DN16373_c0_g1_i1	228	39.14	2	4.09	100
DN999_c0_g1	228	39.1	2	4.1	DN999_c0_g1_i1	228	39.14	2	4.09	100
DN4516_c0_g1	253	58.5	3	4.1	DN4516_c0_g1_i1	246	52.29	1.57	2.4	58.38
DN1094_c0_g1	230	40.5	2	4	DN1094_c0_g1_i1	230	40.51	2	3.95	100
DN2437_c0_g1	230	40.5	2	4	DN2437_c0_g1_i1	230	40.51	2	3.95	100
DN27502_c0_g1	279	80.7	4	4	DN27502_c0_g1_i1	279	80.67	4	3.97	100
DN3803_c0_g1	229	39.8	2	4	DN3803_c0_g1_i1	229	39.82	2	4.02	100
DN49321_c0_g1	230	40.5	2	4	DN49321_c0_g1_i1	230	40.51	2	3.95	100
DN834_c0_g1	229	39.8	2	4	DN834_c0_g1_i1	229	39.82	2	4.02	100
DN8405_c0_g1	229	39.8	2	4	DN8405_c0_g1_i1	229	39.82	2	4.02	100
DN9009_c0_g1	279	80.7	4	4	DN9009_c0_g1_i1	279	80.67	4	3.97	100
DN9201_c0_g1	230	40.5	2	4	DN9201_c0_g1_i1	230	40.51	2	3.95	100
DN9381_c0_g1	254	60.7	3	4	DN9381_c0_g1_i2	229	39.82	1	2.01	50.76
DN12821_c0_g1	365	166	8	3.9	DN12821_c0_g1_i1	365	166	8	3.86	100
DN1458_c0_g1	231	41.2	2	3.9	DN1458_c0_g1_i1	231	41.21	2	3.89	100
DN19657_c0_g1	231	41.2	2	3.9	DN19657_c0_g1_i1	231	41.21	2	3.89	100
DN35462_c0_g1	257	61.2	3	3.9	DN35462_c0_g1_i1	257	61.18	3	3.93	100
DN38712_c0_g1	231	41.2	2	3.9	DN38712_c0_g1_i1	231	41.21	2	3.89	100
DN7632_c1_g1	231	41.2	2	3.9	DN7632_c1_g1_i1	231	41.21	2	3.89	100
DN9596_c0_g1	256	61.3	3	3.9	DN9596_c0_g1_i1	238	46.22	1.41	2.44	62.33
DN10452_c1_g1	232	41.9	2	3.8	DN10452_c1_g1_i1	232	41.9	2	3.82	100
DN1320_c0_g1	232	41.9	2	3.8	DN1320_c0_g1_i1	232	41.9	2	3.82	100
DN18224_c0_g1	305	106	5	3.8	DN18224_c0_g1_i1	305	106	5	3.78	100
DN21995_c0_g1	389	190	9	3.8	DN21995_c0_g1_i1	389	190	9	3.79	100
DN23368_c0_g1	232	41.9	2	3.8	DN23368_c0_g1_i1	232	41.9	2	3.82	100
DN23383_c0_g1	232	41.9	2	3.8	DN23383_c0_g1_i1	232	41.9	2	3.82	100
DN23664_c0_g1	233	42.6	2	3.8	DN23664_c0_g1_i1	233	42.61	2	3.76	100
DN2777_c0_g1	283	84.4	4	3.8	DN2777_c0_g1_i1	283	84.42	4	3.79	100
DN31402_c0_g1	233	42.6	2	3.8	DN31402_c0_g1_i1	233	42.61	2	3.76	100
DN47215_c0_g1	283	84.4	4	3.8	DN47215_c0_g1_i1	283	84.42	4	3.79	100
DN551_c0_g1	232	41.9	2	3.8	DN551_c0_g1_i1	232	41.9	2	3.82	100
DN6078_c0_g1	259	62.9	3	3.8	DN6078_c0_g1_i1	259	62.86	3	3.82	100
DN11195_c1_g1	229	42.3	2	3.8	DN11195_c1_g1_i2	212	29.05	1	2.76	72.83
DN18857_c0_g1	234	43.3	2	3.7	DN18857_c0_g1_i1	234	43.32	2	3.7	100
DN25846_c0_g1	395	196	9	3.7	DN25846_c0_g1_i1	395	196	9	3.68	100
DN30155_c0_g1	234	43.3	2	3.7	DN30155_c0_g1_i1	234	43.32	2	3.7	100
DN42876_c0_g1	234	43.3	2	3.7	DN42876_c0_g1_i1	234	43.32	2	3.7	100
DN44193_c0_g1	285	86.3	4	3.7	DN44193_c0_g1_i1	285	86.32	4	3.71	100
DN48475_c0_g1	261	64.6	3	3.7	DN48475_c0_g1_i1	261	64.57	3	3.72	100
DN9559_c0_g2	351	152	7	3.7	DN9559_c0_g2_i1	351	152	7	3.69	100
DN11536_c0_g1	236	44.8	2	3.6	DN11536_c0_g1_i1	236	44.76	2	3.58	100
DN16890_c0_g1	235	44	2	3.6	DN16890_c0_g1_i1	235	44.04	2	3.64	100
DN28229_c0_g1	264	67.2	3	3.6	DN28229_c0_g1_i1	264	67.15	3	3.58	100
DN28870_c0_g1	309	110	5	3.6	DN28870_c0_g1_i1	309	110	5	3.64	100
DN29502_c0_g1	235	44	2	3.6	DN29502_c0_g1_i1	235	44.04	2	3.64	100
DN46863_c0_g1	235	44	2	3.6	DN46863_c0_g1_i1	235	44.04	2	3.64	100
DN5173_c0_g1	235	44	2	3.6	DN5173_c0_g1_i1	235	44.04	2	3.64	100
DN7375_c0_g1	235	44	2	3.6	DN7375_c0_g1_i1	235	44.04	2	3.64	100
DN10227_c2_g1	238	46.2	2	3.5	DN10227_c2_g1_i1	238	46.22	2	3.46	100
DN16477_c0_g1	265	68	3	3.5	DN16477_c0_g1_i1	265	68.02	3	3.53	100
DN2318_c0_g1	238	46.2	2	3.5	DN2318_c0_g1_i1	238	46.22	2	3.46	100
DN25699_c0_g1	265	68	3	3.5	DN25699_c0_g1_i1	265	68.02	3	3.53	100
DN2657_c0_g1	238	46.2	2	3.5	DN2657_c0_g1_i1	238	46.22	2	3.46	100
DN29963_c0_g1	237	45.5	2	3.5	DN29963_c0_g1_i1	237	45.49	2	3.52	100
DN34861_c0_g1	237	45.5	2	3.5	DN34861_c0_g1_i1	237	45.49	2	3.52	100
DN35993_c0_g1	201	23	1	3.5	DN35993_c0_g1_i1	201	23.03	1	3.48	100
DN39613_c0_g1	237	45.5	2	3.5	DN39613_c0_g1_i1	237	45.49	2	3.52	100
DN42929_c0_g1	201	23	1	3.5	DN42929_c0_g1_i1	201	23.03	1	3.48	100
DN48341_c0_g1	201	23	1	3.5	DN48341_c0_g1_i1	201	23.03	1	3.48	100
DN6099_c0_g2	201	23	1	3.5	DN6099_c0_g2_i1	201	23.03	1	3.48	100
DN11568_c1_g1	202	23.6	1	3.4	DN11568_c1_g1_i1	202	23.55	1	3.4	100
DN12210_c1_g1	202	23.6	1	3.4	DN12210_c1_g1_i1	202	23.55	1	3.4	100
DN13452_c0_g1	294	95	4	3.4	DN13452_c0_g1_i1	294	95.04	4	3.37	100
DN16391_c0_g1	202	23.6	1	3.4	DN16391_c0_g1_i1	202	23.55	1	3.4	100
DN20207_c0_g1	202	23.6	1	3.4	DN20207_c0_g1_i1	202	23.55	1	3.4	100
DN20557_c0_g1	318	119	5	3.4	DN20557_c0_g1_i1	318	119	5	3.36	100
DN21691_c0_g1	294	95	4	3.4	DN21691_c0_g1_i1	294	95.04	4	3.37	100
DN2258_c0_g1	202	23.6	1	3.4	DN2258_c0_g1_i1	202	23.55	1	3.4	100
DN2395_c0_g1	240	47.7	2	3.4	DN2395_c0_g1_i1	240	47.71	2	3.36	100
DN245_c0_g1	240	47.7	2	3.4	DN245_c0_g1_i1	240	47.71	2	3.36	100
DN27754_c0_g1	202	23.6	1	3.4	DN27754_c0_g1_i1	202	23.55	1	3.4	100
DN29564_c0_g1	202	23.6	1	3.4	DN29564_c0_g1_i1	202	23.55	1	3.4	100
DN29755_c0_g1	202	23.6	1	3.4	DN29755_c0_g1_i1	202	23.55	1	3.4	100
DN30222_c0_g1	240	47.7	2	3.4	DN30222_c0_g1_i1	240	47.71	2	3.36	100
DN39809_c0_g1	202	23.6	1	3.4	DN39809_c0_g1_i1	202	23.55	1	3.4	100
DN42669_c0_g1	268	70.7	3	3.4	DN42669_c0_g1_i1	268	70.66	3	3.4	100
DN44364_c0_g1	268	70.7	3	3.4	DN44364_c0_g1_i1	268	70.66	3	3.4	100
DN47288_c0_g1	202	23.6	1	3.4	DN47288_c0_g1_i1	202	23.55	1	3.4	100
DN5214_c0_g1	202	23.6	1	3.4	DN5214_c0_g1_i1	202	23.55	1	3.4	100
DN8363_c0_g2	268	70.7	3	3.4	DN8363_c0_g2_i1	268	70.66	3	3.4	100
DN8389_c0_g1	294	95	4	3.4	DN8389_c0_g1_i2	294	95.04	4	3.37	100
DN11185_c0_g1	203	24.1	1	3.3	DN11185_c0_g1_i1	203	24.07	1	3.33	100
DN11266_c0_g2	203	24.1	1	3.3	DN11266_c0_g2_i1	203	24.07	1	3.33	100
DN12210_c2_g1	242	49.2	2	3.3	DN12210_c2_g1_i1	242	49.21	2	3.25	100
DN19279_c0_g1	392	193	8	3.3	DN19279_c0_g1_i1	392	193	8	3.32	100
DN24275_c0_g1	241	48.5	2	3.3	DN24275_c0_g1_i1	241	48.46	2	3.31	100
DN28144_c0_g1	322	123	5	3.3	DN28144_c0_g1_i1	322	123	5	3.26	100
DN2876_c0_g1	242	49.2	2	3.3	DN2876_c0_g1_i1	242	49.21	2	3.25	100
DN28915_c0_g1	242	49.2	2	3.3	DN28915_c0_g1_i1	242	49.21	2	3.25	100
DN29508_c0_g1	242	49.2	2	3.3	DN29508_c0_g1_i1	242	49.21	2	3.25	100
DN32862_c0_g1	344	145	6	3.3	DN32862_c0_g1_i1	344	145	6	3.31	100
DN4115_c0_g1	203	24.1	1	3.3	DN4115_c0_g1_i1	203	24.07	1	3.33	100
DN48167_c0_g1	297	98	4	3.3	DN48167_c0_g1_i1	297	98.01	4	3.27	100
DN4924_c0_g1	203	24.1	1	3.3	DN4924_c0_g1_i1	203	24.07	1	3.33	100
DN838_c0_g1	204	24.6	1	3.3	DN838_c0_g1_i1	204	24.6	1	3.26	100
DN11245_c1_g1	244	50.7	2	3.2	DN11245_c1_g1_i1	244	50.74	2	3.16	100
DN16060_c0_g1	324	125	5	3.2	DN16060_c0_g1_i1	324	125	5	3.2	100
DN16139_c0_g1	243	50	2	3.2	DN16139_c0_g1_i1	243	49.97	2	3.2	100
DN23602_c0_g1	205	25.1	1	3.2	DN23602_c0_g1_i1	205	25.13	1	3.19	100
DN340_c0_g1	243	50	2	3.2	DN340_c0_g1_i1	243	49.97	2	3.2	100
DN34993_c0_g1	244	50.7	2	3.2	DN34993_c0_g1_i1	244	50.74	2	3.16	100
DN36383_c0_g1	205	25.1	1	3.2	DN36383_c0_g1_i1	205	25.13	1	3.19	100
DN38247_c0_g1	273	75.2	3	3.2	DN38247_c0_g1_i1	273	75.15	3	3.2	100
DN41028_c0_g1	205	25.1	1	3.2	DN41028_c0_g1_i1	205	25.13	1	3.19	100
DN45065_c0_g1	272	74.2	3	3.2	DN45065_c0_g1_i1	272	74.24	3	3.24	100
DN6175_c0_g1	205	25.1	1	3.2	DN6175_c0_g1_i1	205	25.13	1	3.19	100
DN6520_c0_g1	205	25.1	1	3.2	DN6520_c0_g1_i1	205	25.13	1	3.19	100
DN8937_c0_g1	348	148.9	6	3.2	DN8937_c0_g1_i2	338	139	1.89	1.09	33.71
DN11548_c0_g3	206	25.7	1	3.1	DN11548_c0_g3_i1	206	25.67	1	3.12	100
DN11598_c2_g1	207	26.2	1	3.1	DN11598_c2_g1_i1	207	26.22	1	3.05	100
DN15668_c0_g1	246	52.3	2	3.1	DN15668_c0_g1_i1	246	52.29	2	3.06	100
DN1583_c0_g1	207	26.2	1	3.1	DN1583_c0_g1_i1	207	26.22	1	3.05	100
DN2373_c0_g1	431	232	9	3.1	DN2373_c0_g1_i1	431	232	9	3.11	100
DN31577_c0_g1	207	26.2	1	3.1	DN31577_c0_g1_i1	207	26.22	1	3.05	100
DN31980_c0_g1	246	52.3	2	3.1	DN31980_c0_g1_i1	246	52.29	2	3.06	100
DN32453_c0_g1	304	105	4	3.1	DN32453_c0_g1_i1	304	105	4	3.05	100
DN34064_c0_g1	207	26.2	1	3.1	DN34064_c0_g1_i1	207	26.22	1	3.05	100
DN34342_c0_g1	206	25.7	1	3.1	DN34342_c0_g1_i1	206	25.67	1	3.12	100
DN34574_c0_g1	207	26.2	1	3.1	DN34574_c0_g1_i1	207	26.22	1	3.05	100
DN36373_c0_g1	275	77	3	3.1	DN36373_c0_g1_i1	275	76.97	3	3.12	100
DN49338_c0_g1	304	105	4	3.1	DN49338_c0_g1_i1	304	105	4	3.05	100
DN49368_c0_g1	207	26.2	1	3.1	DN49368_c0_g1_i1	207	26.22	1	3.05	100
DN5081_c0_g1	207	26.2	1	3.1	DN5081_c0_g1_i1	207	26.22	1	3.05	100
DN5521_c0_g1	207	26.2	1	3.1	DN5521_c0_g1_i1	207	26.22	1	3.05	100
DN6079_c0_g1	207	26.2	1	3.1	DN6079_c0_g1_i1	207	26.22	1	3.05	100
DN7292_c1_g1	207	26.2	1	3.1	DN7292_c1_g1_i1	207	26.22	1	3.05	100
DN7628_c0_g1	206	25.7	1	3.1	DN7628_c0_g1_i1	206	25.67	1	3.12	100
DN9835_c0_g1	207	26.2	1	3.1	DN9835_c0_g1_i1	207	26.22	1	3.05	100
DN10533_c1_g1	208	26.8	1	3	DN10533_c1_g1_i1	208	26.77	1	2.99	100
DN10957_c0_g4	208	26.8	1	3	DN10957_c0_g4_i1	208	26.77	1	2.99	100
DN16751_c0_g1	279	80.7	3	3	DN16751_c0_g1_i1	279	80.67	3	2.98	100
DN18996_c0_g1	359	160	6	3	DN18996_c0_g1_i1	359	160	6	3	100
DN26507_c0_g1	208	26.8	1	3	DN26507_c0_g1_i1	208	26.77	1	2.99	100
DN42295_c0_g1	248	53.9	2	3	DN42295_c0_g1_i1	248	53.86	2	2.97	100
DN44097_c0_g1	208	26.8	1	3	DN44097_c0_g1_i1	208	26.77	1	2.99	100
DN4731_c0_g1	208	26.8	1	3	DN4731_c0_g1_i1	208	26.77	1	2.99	100
DN7968_c0_g1	247	53.1	2	3	DN7968_c0_g1_i1	247	53.07	2	3.02	100
DN9826_c0_g3	208	26.8	1	3	DN9826_c0_g3_i1	208	26.77	1	2.99	100
DN10416_c0_g1	331	132.1	5	3	DN10416_c0_g1_i1	314	115	3.56	2.48	81.82
DN14512_c0_g1	283	84.4	3	2.9	DN14512_c0_g1_i1	283	84.42	3	2.85	100
DN16279_c0_g1	283	84.4	3	2.9	DN16279_c0_g1_i1	283	84.42	3	2.85	100
DN16624_c0_g1	249	54.7	2	2.9	DN16624_c0_g1_i1	249	54.65	2	2.93	100
DN17039_c0_g1	210	27.9	1	2.9	DN17039_c0_g1_i1	210	27.9	1	2.87	100
DN33860_c0_g1	249	54.7	2	2.9	DN33860_c0_g1_i1	249	54.65	2	2.93	100
DN35097_c0_g1	209	27.3	1	2.9	DN35097_c0_g1_i1	209	27.33	1	2.93	100
DN38008_c0_g1	210	27.9	1	2.9	DN38008_c0_g1_i1	210	27.9	1	2.87	100
DN3807_c0_g1	249	54.7	2	2.9	DN3807_c0_g1_i1	249	54.65	2	2.93	100
DN42127_c0_g1	250	55.5	2	2.9	DN42127_c0_g1_i1	250	55.45	2	2.89	100
DN4467_c1_g1	210	27.9	1	2.9	DN4467_c1_g1_i1	210	27.9	1	2.87	100
DN44703_c0_g1	210	27.9	1	2.9	DN44703_c0_g1_i1	210	27.9	1	2.87	100
DN46198_c0_g1	251	56.3	2	2.9	DN46198_c0_g1_i1	251	56.26	2	2.85	100
DN48590_c0_g1	250	55.5	2	2.9	DN48590_c0_g1_i1	250	55.45	2	2.89	100
DN48693_c0_g1	336	137	5	2.9	DN48693_c0_g1_i1	336	137	5	2.92	100
DN49985_c0_g1	249	54.7	2	2.9	DN49985_c0_g1_i1	249	54.65	2	2.93	100
DN50208_c0_g1	210	27.9	1	2.9	DN50208_c0_g1_i1	210	27.9	1	2.87	100
DN50256_c0_g1	209	27.3	1	2.9	DN50256_c0_g1_i1	209	27.33	1	2.93	100
DN9340_c0_g1	209	27.3	1	2.9	DN9340_c0_g1_i1	209	27.33	1	2.93	100
DN10869_c1_g1	212	29.1	1	2.8	DN10869_c1_g1_i1	212	29.05	1	2.76	100
DN1446_c0_g1	253	57.9	2	2.8	DN1446_c0_g1_i1	253	57.88	2	2.77	100
DN1743_c0_g1	253	57.9	2	2.8	DN1743_c0_g1_i1	253	57.88	2	2.77	100
DN1843_c0_g1	212	29.1	1	2.8	DN1843_c0_g1_i1	212	29.05	1	2.76	100
DN28188_c0_g1	212	29.1	1	2.8	DN28188_c0_g1_i1	212	29.05	1	2.76	100
DN29826_c0_g1	253	57.9	2	2.8	DN29826_c0_g1_i1	253	57.88	2	2.77	100
DN35865_c0_g1	212	29.1	1	2.8	DN35865_c0_g1_i1	212	29.05	1	2.76	100
DN45559_c0_g1	211	28.5	1	2.8	DN45559_c0_g1_i1	211	28.47	1	2.81	100
DN7433_c0_g1	212	29.1	1	2.8	DN7433_c0_g1_i1	212	29.05	1	2.76	100
DN10015_c3_g1	213	29.6	1	2.7	DN10015_c3_g1_i1	213	29.64	1	2.7	100
DN15433_c0_g1	288	89.2	3	2.7	DN15433_c0_g1_i1	288	89.2	3	2.69	100
DN1754_c0_g1	256	60.4	2	2.7	DN1754_c0_g1_i2	256	60.35	2	2.65	100
DN18249_c0_g1	213	29.6	1	2.7	DN18249_c0_g1_i1	213	29.64	1	2.7	100
DN18584_c0_g1	214	30.2	1	2.7	DN18584_c0_g1_i1	214	30.23	1	2.65	100
DN21938_c0_g1	213	29.6	1	2.7	DN21938_c0_g1_i1	213	29.64	1	2.7	100
DN23751_c0_g1	254	58.7	2	2.7	DN23751_c0_g1_i1	254	58.7	2	2.73	100
DN24742_c0_g2	214	30.2	1	2.7	DN24742_c0_g2_i1	214	30.23	1	2.65	100
DN2872_c0_g1	254	58.7	2	2.7	DN2872_c0_g1_i1	254	58.7	2	2.73	100
DN30126_c0_g1	214	30.2	1	2.7	DN30126_c0_g1_i1	214	30.23	1	2.65	100
DN32753_c0_g1	213	29.6	1	2.7	DN32753_c0_g1_i1	213	29.64	1	2.7	100
DN32762_c0_g1	213	29.6	1	2.7	DN32762_c0_g1_i1	213	29.64	1	2.7	100
DN35808_c0_g1	255	59.5	2	2.7	DN35808_c0_g1_i1	255	59.52	2	2.69	100
DN38736_c0_g1	213	29.6	1	2.7	DN38736_c0_g1_i1	213	29.64	1	2.7	100
DN39746_c0_g1	319	120	4	2.7	DN39746_c0_g1_i1	319	120	4	2.67	100
DN41979_c0_g1	255	59.5	2	2.7	DN41979_c0_g1_i1	255	59.52	2	2.69	100
DN42960_c0_g1	213	29.6	1	2.7	DN42960_c0_g1_i1	213	29.64	1	2.7	100
DN43553_c0_g1	255	59.5	2	2.7	DN43553_c0_g1_i1	255	59.52	2	2.69	100
DN48952_c0_g1	254	58.7	2	2.7	DN48952_c0_g1_i1	254	58.7	2	2.73	100
DN6012_c0_g1	213	29.6	1	2.7	DN6012_c0_g1_i1	213	29.64	1	2.7	100
DN7836_c0_g1	256	60.4	2	2.7	DN7836_c0_g1_i1	256	60.35	2	2.65	100
DN8360_c0_g1	213	29.6	1	2.7	DN8360_c0_g1_i1	213	29.64	1	2.7	100
DN9848_c0_g1	213	29.6	1	2.7	DN9848_c0_g1_i1	213	29.64	1	2.7	100
DN0_c0_g1	257	61.2	2	2.6	DN0_c0_g1_i1	257	61.18	2	2.62	100
DN11163_c0_g2	354	155	5	2.6	DN11163_c0_g2_i2	354	155	5	2.58	100
DN12_c0_g1	215	30.8	1	2.6	DN12_c0_g1_i1	215	30.82	1	2.6	100
DN21443_c0_g1	322	123	4	2.6	DN21443_c0_g1_i1	322	123	4	2.6	100
DN3470_c0_g1	216	31.4	1	2.6	DN3470_c0_g1_i1	216	31.43	1	2.55	100
DN35865_c1_g1	216	31.4	1	2.6	DN35865_c1_g1_i1	216	31.43	1	2.55	100
DN42468_c0_g1	215	30.8	1	2.6	DN42468_c0_g1_i1	215	30.82	1	2.6	100
DN43269_c0_g1	216	31.4	1	2.6	DN43269_c0_g1_i1	216	31.43	1	2.55	100
DN50136_c0_g1	259	62.9	2	2.6	DN50136_c0_g1_i1	259	62.86	2	2.55	100
DN7167_c0_g1	215	30.8	1	2.6	DN7167_c0_g1_i1	215	30.82	1	2.6	100
DN7477_c0_g1	259	62.9	2	2.6	DN7477_c0_g1_i1	259	62.86	2	2.55	100
DN9540_c0_g2	216	31.4	1	2.6	DN9540_c0_g2_i1	216	31.43	1	2.55	100
DN14665_c0_g1	395	196	6	2.5	DN14665_c0_g1_i1	395	196	6	2.45	100
DN2038_c0_g1	330	131	4	2.5	DN2038_c0_g1_i1	330	131	4	2.45	100
DN23468_c0_g1	262	65.4	2	2.5	DN23468_c0_g1_i1	262	65.42	2	2.45	100
DN30361_c0_g1	217	32	1	2.5	DN30361_c0_g1_i1	217	32.04	1	2.5	100
DN32713_c0_g1	217	32	1	2.5	DN32713_c0_g1_i1	217	32.04	1	2.5	100
DN35330_c0_g1	218	32.7	1	2.5	DN35330_c0_g1_i1	218	32.65	1	2.45	100
DN39480_c0_g1	262	65.4	2	2.5	DN39480_c0_g1_i1	262	65.42	2	2.45	100
DN4324_c0_g1	218	32.7	1	2.5	DN4324_c0_g1_i1	218	32.65	1	2.45	100
DN49060_c0_g1	294	95	3	2.5	DN49060_c0_g1_i1	294	95.04	3	2.53	100
DN49889_c0_g1	261	64.6	2	2.5	DN49889_c0_g1_i1	261	64.57	2	2.48	100
DN5942_c0_g1	262	65.4	2	2.5	DN5942_c0_g1_i1	262	65.42	2	2.45	100
DN7918_c0_g1	218	32.7	1	2.5	DN7918_c0_g1_i1	218	32.65	1	2.45	100
DN1180_c0_g1	219	33.3	1	2.4	DN1180_c0_g1_i1	219	33.27	1	2.41	100
DN28788_c0_g1	219	33.3	1	2.4	DN28788_c0_g1_i1	219	33.27	1	2.41	100
DN37614_c0_g1	263	66.3	2	2.4	DN37614_c0_g1_i1	263	66.28	2	2.42	100
DN45831_c0_g1	220	33.9	1	2.4	DN45831_c0_g1_i1	220	33.9	1	2.36	100
DN31368_c0_g1	338	139	4	2.3	DN31368_c0_g1_i1	338	139	4	2.3	100
DN35100_c0_g1	266	68.9	2	2.3	DN35100_c0_g1_i1	266	68.9	2	2.32	100
DN36344_c0_g1	221	34.5	1	2.3	DN36344_c0_g1_i1	221	34.54	1	2.32	100
DN41486_c0_g1	268	70.7	2	2.3	DN41486_c0_g1_i1	268	70.66	2	2.27	100
DN42214_c0_g1	222	35.2	1	2.3	DN42214_c0_g1_i1	222	35.18	1	2.28	100
DN42832_c0_g1	222	35.2	1	2.3	DN42832_c0_g1_i1	222	35.18	1	2.28	100
DN43384_c0_g1	221	34.5	1	2.3	DN43384_c0_g1_i1	221	34.54	1	2.32	100
DN4594_c0_g1	222	35.2	1	2.3	DN4594_c0_g1_i1	222	35.18	1	2.28	100
DN48095_c0_g1	305	106	3	2.3	DN48095_c0_g1_i1	305	106	3	2.27	100
DN5174_c0_g1	222	35.2	1	2.3	DN5174_c0_g1_i1	222	35.18	1	2.28	100
DN6086_c0_g1	221	34.5	1	2.3	DN6086_c0_g1_i2	221	34.54	1	2.32	100
DN8810_c0_g1	268	70.7	2	2.3	DN8810_c0_g1_i1	268	70.66	2	2.27	100
DN11643_c4_g1	224	36.5	1	2.2	DN11643_c4_g1_i1	224	36.47	1	2.2	100
DN1214_c0_g1	223	35.8	1	2.2	DN1214_c0_g1_i1	223	35.82	1	2.24	100
DN14533_c0_g1	224	36.5	1	2.2	DN14533_c0_g1_i1	224	36.47	1	2.2	100
DN16911_c0_g1	272	74.2	2	2.2	DN16911_c0_g1_i1	272	74.24	2	2.16	100
DN3381_c0_g1	270	72.4	2	2.2	DN3381_c0_g1_i1	270	72.44	2	2.21	100
DN36762_c0_g1	223	35.8	1	2.2	DN36762_c0_g1_i1	223	35.82	1	2.24	100
DN37669_c0_g1	224	36.5	1	2.2	DN37669_c0_g1_i1	224	36.47	1	2.2	100
DN39843_c0_g1	224	36.5	1	2.2	DN39843_c0_g1_i1	224	36.47	1	2.2	100
DN4284_c0_g1	223	35.8	1	2.2	DN4284_c0_g1_i1	223	35.82	1	2.24	100
DN4644_c0_g1	224	36.5	1	2.2	DN4644_c0_g1_i1	224	36.47	1	2.2	100
DN48419_c0_g1	269	71.6	2	2.2	DN48419_c0_g1_i1	269	71.55	2	2.24	100
DN49402_c0_g1	224	36.5	1	2.2	DN49402_c0_g1_i1	224	36.47	1	2.2	100
DN10015_c2_g1	227	38.5	1	2.1	DN10015_c2_g1_i1	227	38.47	1	2.08	100
DN10372_c0_g1	228	39.1	1	2.1	DN10372_c0_g1_i1	228	39.14	1	2.05	100
DN11616_c3_g2	228	39.1	1	2.1	DN11616_c3_g2_i1	228	39.14	1	2.05	100
DN23145_c0_g1	226	37.8	1	2.1	DN23145_c0_g1_i1	226	37.8	1	2.12	100
DN26695_c0_g1	275	77	2	2.1	DN26695_c0_g1_i1	275	76.97	2	2.08	100
DN29307_c0_g1	276	77.9	2	2.1	DN29307_c0_g1_i1	276	77.89	2	2.06	100
DN33767_c0_g1	226	37.8	1	2.1	DN33767_c0_g1_i1	226	37.8	1	2.12	100
DN40315_c0_g1	471	272	7	2.1	DN40315_c0_g1_i1	471	272	7	2.06	100
DN50156_c0_g1	228	39.1	1	2.1	DN50156_c0_g1_i1	228	39.14	1	2.05	100
DN5566_c0_g2	228	39.1	1	2.1	DN5566_c0_g2_i1	228	39.14	1	2.05	100
DN14760_c0_g1	400	201	5	2	DN14760_c0_g1_i1	400	201	5	1.99	100
DN23435_c0_g1	229	39.8	1	2	DN23435_c0_g1_i1	229	39.82	1	2.01	100
DN30122_c0_g1	230	40.5	1	2	DN30122_c0_g1_i1	230	40.51	1	1.98	100
DN35004_c0_g1	229	39.8	1	2	DN35004_c0_g1_i1	229	39.82	1	2.01	100
DN37675_c0_g1	730	531	13	2	DN37675_c0_g1_i1	730	531	13	1.96	100
DN46625_c0_g1	229	39.8	1	2	DN46625_c0_g1_i1	229	39.82	1	2.01	100
DN46821_c0_g1	277	78.8	2	2	DN46821_c0_g1_i1	277	78.81	2	2.03	100
DN1003_c0_g1	284	85.4	2	1.9	DN1003_c0_g1_i1	284	85.37	2	1.88	100
DN14685_c0_g1	329	130	3	1.9	DN14685_c0_g1_i1	329	130	3	1.85	100
DN19656_c0_g1	231	41.2	1	1.9	DN19656_c0_g1_i1	231	41.21	1	1.94	100
DN2155_c0_g1	234	43.3	1	1.9	DN2155_c0_g1_i1	234	43.32	1	1.85	100
DN22565_c0_g1	283	84.4	2	1.9	DN22565_c0_g1_i1	283	84.42	2	1.9	100
DN28750_c0_g1	234	43.3	1	1.9	DN28750_c0_g1_i1	234	43.32	1	1.85	100
DN30082_c0_g1	232	41.9	1	1.9	DN30082_c0_g1_i1	232	41.9	1	1.91	100
DN41263_c0_g1	281	82.5	2	1.9	DN41263_c0_g1_i1	281	82.54	2	1.94	100
DN45921_c0_g1	327	128	3	1.9	DN45921_c0_g1_i1	327	128	3	1.88	100
DN49401_c0_g1	281	82.5	2	1.9	DN49401_c0_g1_i1	281	82.54	2	1.94	100
DN50261_c0_g1	233	42.6	1	1.9	DN50261_c0_g1_i1	233	42.61	1	1.88	100
DN6490_c0_g1	283	84.4	2	1.9	DN6490_c0_g1_i1	283	84.42	2	1.9	100
DN8321_c1_g1	231	41.2	1	1.9	DN8321_c1_g1_i1	231	41.21	1	1.94	100
DN8564_c0_g1	231	41.2	1	1.9	DN8564_c0_g1_i1	231	41.21	1	1.94	100
DN1500_c0_g1	289	90.2	2	1.8	DN1500_c0_g1_i1	289	90.17	2	1.78	100
DN2204_c0_g1	286	87.3	2	1.8	DN2204_c0_g1_i1	286	87.28	2	1.83	100
DN34950_c0_g1	237	45.5	1	1.8	DN34950_c0_g1_i1	237	45.49	1	1.76	100
DN36188_c0_g1	236	44.8	1	1.8	DN36188_c0_g1_i1	236	44.76	1	1.79	100
DN36441_c0_g1	237	45.5	1	1.8	DN36441_c0_g1_i1	237	45.49	1	1.76	100
DN8178_c0_g1	236	44.8	1	1.8	DN8178_c0_g1_i1	236	44.76	1	1.79	100
DN17003_c0_g1	240	47.7	1	1.7	DN17003_c0_g1_i1	240	47.71	1	1.68	100
DN22816_c0_g1	241	48.5	1	1.7	DN22816_c0_g1_i1	241	48.46	1	1.65	100
DN29903_c0_g1	239	47	1	1.7	DN29903_c0_g1_i1	239	46.96	1	1.71	100
DN35504_c0_g1	293	94.1	2	1.7	DN35504_c0_g1_i1	293	94.06	2	1.7	100
DN37007_c0_g1	296	97	2	1.7	DN37007_c0_g1_i1	296	97.02	2	1.65	100
DN43220_c0_g1	388	189	4	1.7	DN43220_c0_g1_i1	388	189	4	1.69	100
DN43585_c0_g1	240	47.7	1	1.7	DN43585_c0_g1_i1	240	47.71	1	1.68	100
DN4770_c0_g1	294	95	2	1.7	DN4770_c0_g1_i1	294	95.04	2	1.69	100
DN49581_c0_g1	241	48.5	1	1.7	DN49581_c0_g1_i1	241	48.46	1	1.65	100
DN5112_c0_g1	239	47	1	1.7	DN5112_c0_g1_i1	239	46.96	1	1.71	100
DN8295_c0_g1	239	47	1	1.7	DN8295_c0_g1_i1	239	46.96	1	1.71	100
DN17028_c0_g1	243	50	1	1.6	DN17028_c0_g1_i1	243	49.97	1	1.6	100
DN23302_c0_g1	242	49.2	1	1.6	DN23302_c0_g1_i1	242	49.21	1	1.63	100
DN25871_c1_g1	243	50	1	1.6	DN25871_c1_g1_i1	243	49.97	1	1.6	100
DN30227_c0_g1	244	50.7	1	1.6	DN30227_c0_g1_i1	244	50.74	1	1.58	100
DN47327_c0_g1	297	98	2	1.6	DN47327_c0_g1_i1	297	98.01	2	1.63	100
DN5549_c0_g1	299	100	2	1.6	DN5549_c0_g1_i1	299	100	2	1.6	100
DN556_c0_g1	243	50	1	1.6	DN556_c0_g1_i1	243	49.97	1	1.6	100
DN6048_c0_g1	245	51.5	1	1.6	DN6048_c0_g1_i1	245	51.51	1	1.55	100
DN11438_c1_g1	248	53.9	1	1.5	DN11438_c1_g1_i1	248	53.86	1	1.49	100
DN1396_c0_g1	246	52.3	1	1.5	DN1396_c0_g1_i1	246	52.29	1	1.53	100
DN22608_c0_g1	248	53.9	1	1.5	DN22608_c0_g1_i1	248	53.86	1	1.49	100
DN2032_c0_g1	255	59.5	1	1.4	DN2032_c0_g1_i1	255	59.52	1	1.35	100
DN22756_c0_g1	252	57.1	1	1.4	DN22756_c0_g1_i1	252	57.06	1	1.4	100
DN4654_c0_g1	251	56.3	1	1.4	DN4654_c0_g1_i1	251	56.26	1	1.42	100
DN48758_c0_g1	251	56.3	1	1.4	DN48758_c0_g1_i1	251	56.26	1	1.42	100
DN8400_c0_g1	254	58.7	1	1.4	DN8400_c0_g1_i1	254	58.7	1	1.36	100
DN8848_c1_g1	250	55.5	1	1.4	DN8848_c1_g1_i1	250	55.45	1	1.44	100
DN2845_c0_g1	313	113.7	2	1.4	DN2845_c0_g1_i1	286	87.28	1	0.92	65.13
DN18529_c0_g1	259	62.9	1	1.3	DN18529_c0_g1_i1	259	62.86	1	1.27	100
DN50202_c0_g1	260	63.7	1	1.3	DN50202_c0_g1_i1	260	63.71	1	1.26	100
DN5613_c0_g1	256	60.4	1	1.3	DN5613_c0_g1_i1	256	60.35	1	1.33	100
DN6509_c1_g1	320	121	2	1.3	DN6509_c1_g1_i1	320	121	2	1.32	100
DN42623_c0_g1	264	67.2	1	1.2	DN42623_c0_g1_i1	264	67.15	1	1.19	100
DN43306_c0_g1	262	65.4	1	1.2	DN43306_c0_g1_i1	262	65.42	1	1.22	100
DN46524_c0_g1	263	66.3	1	1.2	DN46524_c0_g1_i1	263	66.28	1	1.21	100
DN50157_c0_g1	265	68	1	1.2	DN50157_c0_g1_i1	265	68.02	1	1.18	100
DN16577_c0_g1	269	71.6	1	1.1	DN16577_c0_g1_i1	269	71.55	1	1.12	100
DN1807_c0_g1	270	72.4	1	1.1	DN1807_c0_g1_i2	270	72.44	1	1.11	100
DN22851_c0_g1	351	152	2	1.1	DN22851_c0_g1_i1	351	152	2	1.05	100
DN23589_c0_g1	351	152	2	1.1	DN23589_c0_g1_i1	351	152	2	1.05	100
DN32622_c0_g1	347	148	2	1.1	DN32622_c0_g1_i1	347	148	2	1.08	100
DN9526_c0_g1	273	75.2	1	1.1	DN9526_c0_g1_i1	273	75.15	1	1.07	100
DN1996_c0_g1	282	83.5	1	1	DN1996_c0_g1_i1	282	83.48	1	0.96	100
DN2009_c0_g1	278	79.7	1	1	DN2009_c0_g1_i2	278	79.74	1	1	100
DN28740_c0_g1	368	169	2	1	DN28740_c0_g1_i1	368	169	2	0.95	100
DN41741_c0_g1	280	81.6	1	1	DN41741_c0_g1_i1	280	81.6	1	0.98	100
DN41807_c0_g1	365	166	2	1	DN41807_c0_g1_i1	365	166	2	0.96	100
DN4845_c0_g1	360	161	2	1	DN4845_c0_g1_i1	360	161	2	0.99	100
DN29855_c0_g1	287	88.2	1	0.9	DN29855_c0_g1_i1	287	88.24	1	0.91	100
DN30209_c0_g1	286	87.3	1	0.9	DN30209_c0_g1_i1	286	87.28	1	0.92	100
DN3288_c0_g1	284	85.4	1	0.9	DN3288_c0_g1_i1	284	85.37	1	0.94	100
DN29375_c0_g1	301	102	1	0.8	DN29375_c0_g1_i1	301	102	1	0.79	100
DN22857_c0_g1	328	129	1	0.6	DN22857_c0_g1_i1	328	129	1	0.62	100
DN817_c0_g1	336	137	1	0.6	DN817_c0_g1_i1	336	137	1	0.58	100
DN444_c0_g1	349	150	1	0.5	DN444_c0_g1_i1	349	150	1	0.53	100
DN10301_c1_g1	205	25.1	0	0	DN10301_c1_g1_i1	205	25.13	0	0	0
DN11560_c2_g1	249	54.7	0	0	DN11560_c2_g1_i1	249	54.65	0	0	0
DN11578_c0_g1	259	62.9	0	0	DN11578_c0_g1_i2	259	62.86	0	0	0
DN11578_c1_g2	239	47	0	0	DN11578_c1_g2_i1	239	46.96	0	0	0
DN11643_c3_g1	204	24.6	0	0	DN11643_c3_g1_i1	204	24.6	0	0	0
DN12193_c0_g1	212	29.1	0	0	DN12193_c0_g1_i1	212	29.05	0	0	0
DN12210_c0_g1	222	35.2	0	0	DN12210_c0_g1_i1	222	35.18	0	0	0
DN14654_c0_g1	240	47.7	0	0	DN14654_c0_g1_i1	240	47.71	0	0	0
DN16680_c0_g1	204	24.6	0	0	DN16680_c0_g1_i1	204	24.6	0	0	0
DN16810_c0_g1	205	25.1	0	0	DN16810_c0_g1_i1	205	25.13	0	0	0
DN16948_c0_g1	224	36.5	0	0	DN16948_c0_g1_i1	224	36.47	0	0	0
DN16981_c0_g1	214	30.2	0	0	DN16981_c0_g1_i1	214	30.23	0	0	0
DN17833_c0_g1	211	28.5	0	0	DN17833_c0_g1_i1	211	28.47	0	0	0
DN1913_c0_g1	202	23.6	0	0	DN1913_c0_g1_i1	202	23.55	0	0	0
DN20809_c0_g1	219	33.3	0	0	DN20809_c0_g1_i1	219	33.27	0	0	0
DN2091_c0_g1	201	23	0	0	DN2091_c0_g1_i1	201	23.03	0	0	0
DN21435_c0_g1	208	26.8	0	0	DN21435_c0_g1_i1	208	26.77	0	0	0
DN22338_c0_g1	264	67.2	0	0	DN22338_c0_g1_i1	264	67.15	0	0	0
DN22905_c0_g1	209	27.3	0	0	DN22905_c0_g1_i1	209	27.33	0	0	0
DN23082_c1_g1	292	93.1	0	0	DN23082_c1_g1_i1	292	93.08	0	0	0
DN23275_c0_g1	203	24.1	0	0	DN23275_c0_g1_i1	203	24.07	0	0	0
DN23411_c0_g1	211	28.5	0	0	DN23411_c0_g1_i1	211	28.47	0	0	0
DN23788_c0_g1	249	54.7	0	0	DN23788_c0_g1_i1	249	54.65	0	0	0
DN23797_c0_g1	205	25.1	0	0	DN23797_c0_g1_i1	205	25.13	0	0	0
DN24131_c0_g1	211	28.5	0	0	DN24131_c0_g1_i1	211	28.47	0	0	0
DN24131_c1_g1	282	83.5	0	0	DN24131_c1_g1_i1	282	83.48	0	0	0
DN261_c0_g1	208	26.8	0	0	DN261_c0_g1_i1	208	26.77	0	0	0
DN27982_c0_g1	213	29.6	0	0	DN27982_c0_g1_i1	213	29.64	0	0	0
DN28592_c0_g1	216	31.4	0	0	DN28592_c0_g1_i1	216	31.43	0	0	0
DN2868_c0_g1	224	36.5	0	0	DN2868_c0_g1_i1	224	36.47	0	0	0
DN29805_c0_g1	212	29.1	0	0	DN29805_c0_g1_i1	212	29.05	0	0	0
DN30189_c0_g1	219	33.3	0	0	DN30189_c0_g1_i1	219	33.27	0	0	0
DN34335_c0_g1	323	124	0	0	DN34335_c0_g1_i1	323	124	0	0	0
DN3455_c0_g1	205	25.1	0	0	DN3455_c0_g1_i1	205	25.13	0	0	0
DN36333_c0_g1	220	33.9	0	0	DN36333_c0_g1_i1	220	33.9	0	0	0
DN36615_c0_g1	205	25.1	0	0	DN36615_c0_g1_i1	205	25.13	0	0	0
DN36801_c0_g1	238	46.2	0	0	DN36801_c0_g1_i1	238	46.22	0	0	0
DN36962_c0_g1	249	54.7	0	0	DN36962_c0_g1_i1	249	54.65	0	0	0
DN36984_c0_g1	215	30.8	0	0	DN36984_c0_g1_i1	215	30.82	0	0	0
DN37013_c0_g1	258	62	0	0	DN37013_c0_g1_i1	258	62.02	0	0	0
DN3747_c0_g1	240	47.7	0	0	DN3747_c0_g1_i1	240	47.71	0	0	0
DN48412_c0_g1	255	59.5	0	0	DN48412_c0_g1_i1	255	59.52	0	0	0
DN48949_c0_g1	276	77.9	0	0	DN48949_c0_g1_i1	276	77.89	0	0	0
DN49231_c0_g1	206	25.7	0	0	DN49231_c0_g1_i1	206	25.67	0	0	0
DN49283_c0_g1	248	53.9	0	0	DN49283_c0_g1_i1	248	53.86	0	0	0
DN49418_c0_g1	205	25.1	0	0	DN49418_c0_g1_i1	205	25.13	0	0	0
DN50248_c0_g1	209	27.3	0	0	DN50248_c0_g1_i2	209	27.33	0	0	0
DN5062_c0_g1	210	27.9	0	0	DN5062_c0_g1_i1	210	27.9	0	0	0
DN5679_c0_g1	236	44.8	0	0	DN5679_c0_g1_i1	236	44.76	0	0	0
DN5907_c0_g1	207	26.2	0	0	DN5907_c0_g1_i1	207	26.22	0	0	0
DN5970_c1_g1	203	24.1	0	0	DN5970_c1_g1_i1	203	24.07	0	0	0
DN6848_c0_g1	241	48.5	0	0	DN6848_c0_g1_i1	241	48.46	0	0	0
DN7330_c0_g1	260	63.7	0	0	DN7330_c0_g1_i1	260	63.71	0	0	0
DN7735_c0_g1	227	38.5	0	0	DN7735_c0_g1_i1	227	38.47	0	0	0
DN7965_c1_g1	223	35.8	0	0	DN7965_c1_g1_i1	223	35.82	0	0	0
DN8251_c1_g1	205	25.1	0	0	DN8251_c1_g1_i1	205	25.13	0	0	0
DN8288_c0_g1	206	25.7	0	0	DN8288_c0_g1_i1	206	25.67	0	0	0
DN8363_c0_g1	204	24.6	0	0	DN8363_c0_g1_i1	204	24.6	0	0	0
DN8725_c1_g1	217	32	0	0	DN8725_c1_g1_i1	217	32.04	0	0	0
DN8796_c1_g1	207	26.2	0	0	DN8796_c1_g1_i1	207	26.22	0	0	0
DN8920_c0_g1	251	56.3	0	0	DN8920_c0_g1_i1	251	56.26	0	0	0
DN9181_c0_g1	233	42.6	0	0	DN9181_c0_g1_i1	233	42.61	0	0	0
DN9537_c0_g1	241	48.5	0	0	DN9537_c0_g1_i1	241	48.46	0	0	0
DN9769_c3_g1	258	62	0	0	DN9769_c3_g1_i1	258	62.02	0	0	0
DN7965_c0_g1	312	113	0	0	DN7965_c0_g1_i1	323	124	0	0	0

## Sheet: Mobile elements
Mobile elements, plasmids, viruses
	Number of Gene ID TrinityAssID Trinity (after removing doublon):							137
	TPM (sum of the Gene ID Trinity )							99623
Gene count					Isoform count									Fonction						Affiliation
Gene ID Trinity	length	effective_length	expected_count	TPM	Transcript ID Trinity	Trc ID-JGI	ORF ID JGI		length	effective_length	expected_count	TPM	IsoPct	type	ORF length	%Ident	strand	Product name	source	lineage - domain	phylum	class	order	family	genus	species
DN11319_c0_g1	8401	8202	1281	12.5	DN11319_c0_g1_i1	G151306	G1513061	1	8401	8202	1281	12.51	100	CDS	300	#N/A	1	HP	HPrule	Phage						#N/A
DN11319_c0_g1	8401	8202	1281	12.5	DN11319_c0_g1_i1	G151306	G1513062	2	8401	8202	1281	12.51	100	CDS	255	#N/A	1	HP	HPrule	Phage						#N/A
DN11319_c0_g1	8401	8202	1281	12.5	DN11319_c0_g1_i1	G151306	G1513063	3	8401	8202	1281	12.51	100	CDS	591	43.78	1	HP	HPrule	Phage						Acetobacteraceae bacterium AT-5844
DN11319_c0_g1	8401	8202	1281	12.5	DN11319_c0_g1_i1	G151306	G1513064	4	8401	8202	1281	12.51	100	CDS	513	34.71	1	phage terminase Nu1 subunit (DNA packaging protein)	COG4220	Phage						Paraburkholderia sediminicola
DN11319_c0_g1	8401	8202	1281	12.5	DN11319_c0_g1_i1	G151306	G1513065	5	8401	8202	1281	12.51	100	CDS	1953	57.34	1	phage terminase large subunit GpA-like protein	COG5525	Phage						Marinobacter pelagius
DN11319_c0_g1	8401	8202	1281	12.5	DN11319_c0_g1_i1	G151306	G1513066	6	8401	8202	1281	12.51	100	CDS	558	43.48	1	HP	HPrule	Phage						Rickettsia hoogstraalii
DN11319_c0_g1	8401	8202	1281	12.5	DN11319_c0_g1_i1	G151306	G1513067	7	8401	8202	1281	12.51	100	CDS	1473	43.27	1	capsid protein	COG5511	Phage						Rickettsia hoogstraalii
DN11319_c0_g1	8401	8202	1281	12.5	DN11319_c0_g1_i1	G151306	G1513068	8	8401	8202	1281	12.51	100	CDS	1917	52.61	1	phage head maturation protease	COG3740	Phage						Thioalkalivibrio sp. ALgr3
DN11319_c0_g1	8401	8202	1281	12.5	DN11319_c0_g1_i1	G151306	G1513069	9	8401	8202	1281	12.51	100	CDS	321	#N/A	1	HP	HPrule	Phage						#N/A
DN11319_c0_g1	8401	8202	1281	12.5	DN11319_c0_g1_i1	G151306	G15130610	10	8401	8202	1281	12.51	100	CDS	165	#N/A	1	HP	HPrule	Phage						#N/A
DN11117_c0_g1	6128	5928.8	2841	38.4	DN11117_c0_g1_i1	G151155	G1511551	1	4375	4176	1455.74	27.91	72.75	CDS	870	34.95	-1	HP	HPrule	Phage	Proteobacteria					Methyloglobulus morosus
DN11117_c0_g1	6128	5928.8	2841	38.4	DN11117_c0_g1_i1	G151155	G1511552	2	4375	4176	1455.74	27.91	72.75	CDS	765	47.04	-1	HP	HPrule	Phage	Proteobacteria					Methyloglobulus morosus
DN11117_c0_g1	6128	5928.8	2841	38.4	DN11117_c0_g1_i1	G151155	G1511553	3	4375	4176	1455.74	27.91	72.75	CDS	513	55.84	-1	helix-turn-helix protein	pfam01381	Phage	Proteobacteria					Salmonella enterica
DN11117_c0_g1	6128	5928.8	2841	38.4	DN11117_c0_g1_i1	G151155	G1511554	4	4375	4176	1455.74	27.91	72.75	CDS	195	#N/A	1	Cro protein	pfam09048	Phage	Proteobacteria					#N/A
DN11117_c0_g1	6128	5928.8	2841	38.4	DN11117_c0_g1_i1	G151155	G15115510	10	4375	4176	1455.74	27.91	72.75	CDS	264	64.2	1	HP	HPrule	Phage	Proteobacteria					Halomonas jeotgali
DN11117_c0_g1	6128	5928.8	2841	38.4	DN11117_c0_g1_i2	G151323	G1513232	2	10807	10608	1385.26	10.46	27.25	CDS	1296	50.24	1	integrase	COG0582	Phage	Proteobacteria					Burkholderia pseudomallei
DN11117_c0_g1	6128	5928.8	2841	38.4	DN11117_c0_g1_i2	G151323	G1513233	3	10807	10608	1385.26	10.46	27.25	CDS	192	46.67	-1	prophage regulatory protein	KO:K07733	Phage	Proteobacteria					Dyella japonica
DN11117_c0_g1	6128	5928.8	2841	38.4	DN11117_c0_g1_i2	G151323	G1513236	6	10807	10608	1385.26	10.46	27.25	CDS	915	73.36	-1	DNA (cytosine-5)-methyltransferase 1	KO:K00558	Phage	Proteobacteria					Cobetia marina
DN11117_c0_g1	6128	5928.8	2841	38.4	DN11117_c0_g1_i2	G151323	G1513238	8	10807	10608	1385.26	10.46	27.25	CDS	306	46.97	-1	HP	HPrule	Phage	Proteobacteria					Acidovorax sp. KKS102
DN11117_c0_g1	6128	5928.8	2841	38.4	DN11117_c0_g1_i2	G151323	G15132312	12	10807	10608	1385.26	10.46	27.25	CDS	462	41.51	-1	HP	HPrule	Phage	Proteobacteria					Duganella sp. OV458
DN636_c0_g1	4498	4299	395	7.4	DN636_c0_g1_i1	G151172	G1511721	1	4498	4299	395	7.36	100	CDS	555	35.47	1	phage terminase small subunit	KO:K07474	Phage	Proteobacteria	Betaproteobacteria	Burkholderiales	Oxalobacteraceae	Herminiimonas	Herminiimonas sp. CN
DN636_c0_g1	4498	4299	395	7.4	DN636_c0_g1_i1	G151172	G1511722	2	4498	4299	395	7.36	100	CDS	2130	51.75	1	HP/phage terminase large subunit-like protein	COG5410,COG5362	Phage	Proteobacteria	Betaproteobacteria	Burkholderiales	Oxalobacteraceae	Herminiimonas	Herminiimonas sp. CN
DN636_c0_g1	4498	4299	395	7.4	DN636_c0_g1_i1	G151172	G1511723	3	4498	4299	395	7.36	100	CDS	1809	64.4	1	HP	HPrule	Phage	Proteobacteria	Betaproteobacteria	Burkholderiales	Oxalobacteraceae	Herminiimonas	Acidovorax sp. T1
DN10600_c0_g1	4258	4059	308	6.1	DN10600_c0_g1_i1	G151147	G1511471	1	4258	4059	308	6.08	100	CDS	246	#N/A	1	DNA-binding Xre family transcriptional regulator	COG3655	Phage	Proteobacteria					#N/A
DN10600_c0_g1	4258	4059	308	6.1	DN10600_c0_g1_i1	G151147	G1511472	2	4258	4059	308	6.08	100	CDS	2334	44.02	1	phage/plasmid-associated DNA primase	COG3378	Phage	Proteobacteria					Acidovorax sp. T1
DN10600_c0_g1	4258	4059	308	6.1	DN10600_c0_g1_i1	G151147	G1511473	3	4258	4059	308	6.08	100	CDS	264	#N/A	1	HP	HPrule	Phage	Proteobacteria					#N/A
DN10600_c0_g1	4258	4059	308	6.1	DN10600_c0_g1_i1	G151147	G1511474	4	4258	4059	308	6.08	100	CDS	240	#N/A	1	HP	HPrule	Phage	Proteobacteria					#N/A
DN10600_c0_g1	4258	4059	308	6.1	DN10600_c0_g1_i1	G151147	G1511475	5	4258	4059	308	6.08	100	CDS	264	#N/A	1	HP	HPrule	Phage	Proteobacteria					#N/A
DN10600_c0_g1	4258	4059	308	6.1	DN10600_c0_g1_i1	G151147	G1511476	6	4258	4059	308	6.08	100	CDS	243	#N/A	1	HP	HPrule	Phage	Proteobacteria					#N/A
DN10600_c0_g1	4258	4059	308	6.1	DN10600_c0_g1_i1	G151147	G1511477	7	4258	4059	308	6.08	100	CDS	225	#N/A	1	HP	HPrule	Phage	Proteobacteria					#N/A
DN10600_c0_g1	4258	4059	308	6.1	DN10600_c0_g1_i1	G151147	G1511478	8	4258	4059	308	6.08	100	CDS	210	#N/A	1	HP	HPrule	Phage	Proteobacteria					#N/A
DN10600_c0_g1	4258	4059	308	6.1	DN10600_c0_g1_i1	G151147	G1511479	9	4258	4059	308	6.08	100	CDS	114	#N/A	1	HP	HPrule	Phage	Proteobacteria					#N/A
DN8561_c0_g1	3285	3086	846	22	DN8561_c0_g1_i1	G151033	G1510331	1	3285	3086	846	21.95	100	CDS	1017	99.11	-1	predicted phage-related endonuclease	COG5377	Phage	Proteobacteria	Gammaproteobacteria				Escherichia coli
DN8561_c0_g1	3285	3086	846	22	DN8561_c0_g1_i1	G151033	G1510332	2	3285	3086	846	21.95	100	CDS	144	100	-1	HP	HPrule	Phage	Proteobacteria	Gammaproteobacteria				Proteus mirabilis
DN8561_c0_g1	3285	3086	846	22	DN8561_c0_g1_i1	G151033	G1510333	3	3285	3086	846	21.95	100	CDS	819	100	-1	RecT family protein	pfam03837	Phage	Proteobacteria	Gammaproteobacteria				Vibrio cholerae
DN8561_c0_g1	3285	3086	846	22	DN8561_c0_g1_i1	G151033	G1510334	4	3285	3086	846	21.95	100	CDS	420	99.28	-1	single-strand DNA-binding protein	KO:K03111	Phage	Proteobacteria	Gammaproteobacteria				Aliiglaciecola lipolytica
DN8561_c0_g1	3285	3086	846	22	DN8561_c0_g1_i1	G151033	G1510335	5	3285	3086	846	21.95	100	CDS	327	97.22	-1	HP	HPrule	Phage	Proteobacteria	Gammaproteobacteria				Idiomarinaceae bacterium HL-53
DN11144_c0_g1	3251	3052.2	1079	28.3	DN11144_c0_g1_i2	G151020	G1510201	1	3238	3039	791.1	20.85	73.64	CDS	90	96.67	-1	HP	HPrule	Phage	Proteobacteria	Alphaproteobacteria				Stappia indica
DN11144_c0_g1	3251	3052.2	1079	28.3	DN11144_c0_g1_i2	G151020	G1510202	2	3238	3039	791.1	20.85	73.64	CDS	387	91.41	-1	transposase	COG3293	Phage	Proteobacteria	Alphaproteobacteria				Sphingobium ummariense
DN11144_c0_g1	3251	3052.2	1079	28.3	DN11144_c0_g1_i2	G151020	G1510203	3	3238	3039	791.1	20.85	73.64	CDS	348	91.3	-1	transposase	COG3293	Phage	Proteobacteria	Alphaproteobacteria				Pseudoxanthobacter soli
DN11144_c0_g1	3251	3052.2	1079	28.3	DN11144_c0_g1_i2	G151020	G1510204	4	3238	3039	791.1	20.85	73.64	CDS	453	90.67	-1	putative acetyltransferase	KO:K03827	Phage	Proteobacteria	Alphaproteobacteria				Stappia sp. ARW1T
DN11144_c0_g1	3251	3052.2	1079	28.3	DN11144_c0_g1_i2	G151020	G1510205	5	3238	3039	791.1	20.85	73.64	CDS	237	69.05	1	HP	HPrule	Phage	Proteobacteria	Alphaproteobacteria				Azospirillum brasilense
DN11144_c0_g1	3251	3052.2	1079	28.3	DN11144_c0_g1_i2	G151020	G1510206	6	3238	3039	791.1	20.85	73.64	CDS	849	93.26	-1	pyridoxine kinase	KO:K00868	Phage	Proteobacteria	Alphaproteobacteria				Stappia sp. ARW1T
DN11144_c0_g1	3251	3052.2	1079	28.3	DN11144_c0_g1_i2	G151020	G1510207	7	3238	3039	791.1	20.85	73.64	CDS	699	86.64	-1	GMP synthase (glutamine-hydrolysing)	KO:K01951	Phage	Proteobacteria	Alphaproteobacteria				Stappia sp. ARW1T
DN11144_c0_g1	3251	3052.2	1079	28.3	DN11144_c0_g1_i1	G151141	G1511411	1	4180	3981	267.54	5.38	19.01	CDS	306	90.91	1	phage-related protein	COG4679	Phage	Proteobacteria	Alphaproteobacteria				Hoeflea phototrophica
DN11144_c0_g1	3251	3052.2	1079	28.3	DN11144_c0_g1_i1	G151141	G1511412	2	4180	3981	267.54	5.38	19.01	CDS	288	86.17	1	transcriptional regulator with XRE-family HTH domain	COG1396	Phage	Proteobacteria	Alphaproteobacteria				Hoeflea phototrophica
DN11544_c0_g2	2900	2701	952.2	28.2	DN11544_c0_g2_i1	G150921	G1509211	1	2900	2701	952.16	28.23	100	CDS	93	#N/A	-1	HP	HPrule	Phage						#N/A
DN11544_c0_g2	2900	2701	952.2	28.2	DN11544_c0_g2_i1	G150921	G1509212	2	2900	2701	952.16	28.23	100	CDS	261	#N/A	-1	HP	HPrule	Phage						#N/A
DN11544_c0_g2	2900	2701	952.2	28.2	DN11544_c0_g2_i1	G150921	G1509213	3	2900	2701	952.16	28.23	100	CDS	207	#N/A	-1	HP	HPrule	Phage						#N/A
DN11544_c0_g2	2900	2701	952.2	28.2	DN11544_c0_g2_i1	G150921	G1509214	4	2900	2701	952.16	28.23	100	CDS	729	#N/A	-1	membrane-bound lytic murein transglycosylase MltF	COG4623	Phage						#N/A
DN11544_c0_g2	2900	2701	952.2	28.2	DN11544_c0_g2_i1	G150921	G1509215	5	2900	2701	952.16	28.23	100	CDS	234	#N/A	-1	HP	HPrule	Phage						#N/A
DN11544_c0_g2	2900	2701	952.2	28.2	DN11544_c0_g2_i1	G150921	G1509216	6	2900	2701	952.16	28.23	100	CDS	459	#N/A	-1	HP	HPrule	Phage						#N/A
DN11544_c0_g2	2900	2701	952.2	28.2	DN11544_c0_g2_i1	G150921	G1509217	7	2900	2701	952.16	28.23	100	CDS	459	#N/A	-1	HP	HPrule	Phage						#N/A
DN11544_c0_g2	2900	2701	952.2	28.2	DN11544_c0_g2_i1	G150921	G1509218	8	2900	2701	952.16	28.23	100	CDS	84	#N/A	-1	HP	HPrule	Phage						#N/A
DN4872_c1_g2	2617	2418	586888	19435.8	DN4872_c1_g2_i1	G150825	G1508251	1	2617	2418	586888	19435.8	100	CDS	456	#N/A	1	HP	HPrule	Phage						#N/A
DN4872_c1_g2	2617	2418	586888	19435.8	DN4872_c1_g2_i1	G150825	G1508252	2	2617	2418	586888	19435.8	100	CDS	459	#N/A	1	HP	HPrule	Phage						#N/A
DN4872_c1_g2	2617	2418	586888	19435.8	DN4872_c1_g2_i1	G150825	G1508253	3	2617	2418	586888	19435.8	100	CDS	234	#N/A	1	HP	HPrule	Phage						#N/A
DN4872_c1_g2	2617	2418	586888	19435.8	DN4872_c1_g2_i1	G150825	G1508254	4	2617	2418	586888	19435.8	100	CDS	726	35.65	1	soluble lytic murein transglycosylase-like protein	COG0741	Phage						Clostridium colicanis
DN4872_c1_g2	2617	2418	586888	19435.8	DN4872_c1_g2_i1	G150825	G1508255	5	2617	2418	586888	19435.8	100	CDS	252	#N/A	1	HP	HPrule	Phage						#N/A
DN4872_c1_g2	2617	2418	586888	19435.8	DN4872_c1_g2_i1	G150825	G1508256	6	2617	2418	586888	19435.8	100	CDS	306	#N/A	1	HP	HPrule	Phage						#N/A
DN4872_c1_g2	2617	2418	586888	19435.8	DN4872_c1_g2_i1	G150825	G1508257	7	2617	2418	586888	19435.8	100	CDS	111	#N/A	1	HP	HPrule	Phage						#N/A
DN8512_c0_g1	1785	1585.7	199	10.1	DN8512_c0_g1_i1	G150204	G1502041	1	1799	1600	140.78	7.05	70.11	CDS	330	64.15	1	phage-related protein	COG4679	Phage	Proteobacteria	Alphaproteobacteria	Caulobacterales	Caulobacteraceae	Caulobacter	Caulobacter sp. K31
DN8512_c0_g1	1785	1585.7	199	10.1	DN8512_c0_g1_i1	G150204	G1502042	2	1799	1600	140.78	7.05	70.11	CDS	282	46.74	1	transcriptional regulator with XRE-family HTH domain	COG1396	Phage	Proteobacteria	Alphaproteobacteria	Caulobacterales	Caulobacteraceae	Caulobacter	Caulobacter sp. K31
DN8512_c0_g1	1785	1585.7	199	10.1	DN8512_c0_g1_i1	G150204	G1502043	3	1799	1600	140.78	7.05	70.11	CDS	363	#N/A	-1	HP	HPrule	Phage	Proteobacteria	Alphaproteobacteria	Caulobacterales	Caulobacteraceae	Caulobacter	#N/A
DN11193_c1_g1	1345	1145.7	152	10.6	DN11193_c1_g1_i1	G149299	G1492991	1	1345	1146	109.84	7.68	72.25	CDS	327	75	1	phage-related protein	COG4679	Phage						Planctomicrobium piriforme
DN11193_c1_g1	1345	1145.7	152	10.6	DN11193_c1_g1_i1	G149299	G1492992	2	1345	1146	109.84	7.68	72.25	CDS	324	65.05	1	transcriptional regulator with XRE-family HTH domain	COG1396	Phage						Microcoleus sp. PCC 7113
DN11193_c1_g1	1345	1145.7	152	10.6	DN11193_c1_g1_i1	G149299	G1492993	3	1345	1146	109.84	7.68	72.25	CDS	222	82.19	1	ParD-like antitoxin of type II ParDE toxin-antitoxin system	pfam11903	Phage						Halomonas halocynthiae
DN11193_c1_g1	1345	1145.7	152	10.6	DN11193_c1_g1_i1	G149299	G1492994	4	1345	1146	109.84	7.68	72.25	CDS	297	84.38	1	mRNA-degrading endonuclease RelE of RelBE toxin-antitoxin system	COG2026	Phage						Halomonas sp.
DN7902_c0_g1	1034	835	65	6.2	DN7902_c0_g1_i1	G148030	G1480301	1	1034	835	65	6.23	100	CDS	201	76.92	1	uncharacterized membrane protein YqaE (UPF0057 family)	COG0401	Phage	Proteobacteria	Gammaproteobacteria	Oceanospirillales	Oceanospirillaceae	Marinomonas	Marinomonas ushuaiensis
DN7902_c0_g1	1034	835	65	6.2	DN7902_c0_g1_i1	G148030	G1480302	2	1034	835	65	6.23	100	CDS	291	#N/A	-1	predicted XRE-type DNA-binding protein	COG5606	Phage	Proteobacteria	Gammaproteobacteria	Oceanospirillales	Oceanospirillaceae	Marinomonas	#N/A
DN7902_c0_g1	1034	835	65	6.2	DN7902_c0_g1_i1	G148030	G1480303	3	1034	835	65	6.23	100	CDS	315	#N/A	-1	phage-related protein	COG4679	Phage	Proteobacteria	Gammaproteobacteria	Oceanospirillales	Oceanospirillaceae	Marinomonas	#N/A
DN11091_c0_g1	905	706	40	4.5	DN11091_c0_g1_i1	G147173	G1471731	1	905	706	40	4.54	100	CDS	309	56.38	1	predicted XRE-type DNA-binding protein	COG5606	Phage	Proteobacteria	Gammaproteobacteria				Glaciecola pallidula
DN11091_c0_g1	905	706	40	4.5	DN11091_c0_g1_i1	G147173	G1471732	2	905	706	40	4.54	100	CDS	345	57.41	-1	phage-related protein	COG4679	Phage	Proteobacteria	Gammaproteobacteria				Methylobacter tundripaludum
DN37080_c0_g1	703	504	25	4	DN37080_c0_g1_i1	G144917	G1449171	1	703	504	25	3.97	100	CDS	333	98.11	1	phage-related protein	COG4679	Phage	Proteobacteria	Gammaproteobacteria	Alteromonadales	Alteromonadaceae	Marinobacter	Marinobacter sp. LV10MA510-1
DN37080_c0_g1	703	504	25	4	DN37080_c0_g1_i1	G144917	G1449172	2	703	504	25	3.97	100	CDS	291	93.75	1	transcriptional regulator with XRE-family HTH domain	COG1396	Phage	Proteobacteria	Gammaproteobacteria	Alteromonadales	Alteromonadaceae	Marinobacter	Marinobacter sp. ELB17
DN32312_c0_g1	681	482	15	2.5	DN32312_c0_g1_i1	G144544	G1445441	1	681	482	15	2.49	100	CDS	129	#N/A	-1	HP	HPrule	Phage	Bacteroidetes					#N/A
DN32312_c0_g1	681	482	15	2.5	DN32312_c0_g1_i1	G144544	G1445442	2	681	482	15	2.49	100	CDS	285	91.4	-1	DNA-binding phage protein	COG3636	Phage	Bacteroidetes					Algoriphagus aquimarinus
DN32312_c0_g1	681	482	15	2.5	DN32312_c0_g1_i1	G144544	G1445443	3	681	482	15	2.49	100	CDS	162	80.77	-1	putative component of toxin-antitoxin plasmid stabilization module	COG3657	Phage	Bacteroidetes					Prolixibacter denitrificans
DN47057_c0_g1	675	476	19	3.2	DN47057_c0_g1_i1	G144452	G1444521		675	476	19	3.2	100	CDS	648	88.37	-1	phage repressor protein C with HTH and peptisase S24 domain	COG2932	Phage	Bacteroidetes	Flavobacteriia	Flavobacteriales	Flavobacteriaceae	Winogradskyella	Winogradskyella epiphytica
DN33770_c0_g1	662	463	17	2.9	DN33770_c0_g1_i1	G144201	G1442011	1	662	463	17	2.94	100	CDS	159	60.42	1	putative component of toxin-antitoxin plasmid stabilization module	COG3657	Phage						uncultured Achromatium sp.
DN33770_c0_g1	662	463	17	2.9	DN33770_c0_g1_i1	G144201	G1442012	2	662	463	17	2.94	100	CDS	291	49.45	1	DNA-binding phage protein	COG3636	Phage						Eggerthella sp. YY7918
DN39079_c0_g1	649	450	23	4.1	DN39079_c0_g1_i1	G143984	G1439841	1	649	450	23	4.09	100	CDS	246	48.68	1	HP	HPrule	Phage	Bacteroidetes	Flavobacteriia	Flavobacteriales	Flavobacteriaceae	Maribacter	Maribacter sp. Hel_I_7
DN39079_c0_g1	649	450	23	4.1	DN39079_c0_g1_i1	G143984	G1439842	2	649	450	23	4.09	100	CDS	174	#N/A	-1	phage gpG-like protein	COG5005	Phage	Bacteroidetes	Flavobacteriia	Flavobacteriales	Flavobacteriaceae	Maribacter	#N/A
DN47653_c0_g1	592	393	22	4.5	DN47653_c0_g1_i1	G142726	G1427261	1	592	393	22	4.48	100	CDS	327	81.48	1	phage-related protein	COG4679	Phage	Bacteroidetes	Flavobacteriia	Flavobacteriales	Flavobacteriaceae		Tenacibaculum dicentrarchi
DN47653_c0_g1	592	393	22	4.5	DN47653_c0_g1_i1	G142726	G1427262	2	592	393	22	4.48	100	CDS	261	90.8	1	transcriptional regulator with XRE-family HTH domain	COG1396	Phage	Bacteroidetes	Flavobacteriia	Flavobacteriales	Flavobacteriaceae		Nonlabens sediminis
DN9898_c0_g1	546	347	19904	4593.2	DN9898_c0_g1_i1	G141401	G1414011	1	546	347	19904	4593.18	100	CDS	261	94.94	1	HP	KO:K09794	Phage	Proteobacteria	Alphaproteobacteria	Rhodobacterales	Rhodobacteraceae	Stappia	Stappia indica
DN9898_c0_g1	546	347	19904	4593.2	DN9898_c0_g1_i1	G141401	G1414012	2	546	347	19904	4593.18	100	CDS	222	95.89	-1	phage-related minor tail protein	COG5281	Phage	Proteobacteria	Alphaproteobacteria	Rhodobacterales	Rhodobacteraceae	Stappia	Stappia indica
DN34525_c0_g1	506	307	17	4.4	DN34525_c0_g1_i1	G140036	G1400361		506	307	17	4.43	100	CDS	462	94.12	1	phage repressor protein C with HTH and peptisase S24 domain	COG2932	Phage	Bacteroidetes	Flavobacteriia	Flavobacteriales	Flavobacteriaceae	Aequorivita	Aequorivita viscosa
DN34386_c0_g1	497	298	12	3.2	DN34386_c0_g1_i1	G139672	G1396721	1	497	298	12	3.22	100	CDS	138	55.88	-1	prophage regulatory protein	KO:K07733	Phage	Proteobacteria	Gammaproteobacteria	Pasteurellales	Pasteurellaceae	Muribacter	Muribacter muris
DN34386_c0_g1	497	298	12	3.2	DN34386_c0_g1_i1	G139672	G1396722	2	497	298	12	3.22	100	CDS	201	#N/A	-1	predicted DNA-binding transcriptional regulator AlpA	COG3311	Phage	Proteobacteria	Gammaproteobacteria	Pasteurellales	Pasteurellaceae	Muribacter	#N/A
DN47983_c0_g1	446	247	8	2.6	DN47983_c0_g1_i1	G137225	G1372251	1	446	247	8	2.59	100	CDS	219	86.3	-1	transcriptional regulator with XRE-family HTH domain	COG1396	Phage	Bacteroidetes	Cytophagia	Cytophagales	Cytophagaceae	Cytophaga	Cytophaga xylanolytica
DN47983_c0_g1	446	247	8	2.6	DN47983_c0_g1_i1	G137225	G1372252	2	446	247	8	2.59	100	CDS	225	74.32	-1	phage-related protein	COG4679	Phage	Bacteroidetes	Cytophagia	Cytophagales	Cytophagaceae	Cytophaga	Cytophaga xylanolytica
DN32374_c0_g1	445	246	13	4.2	DN32374_c0_g1_i1	G137155	G1371551	1	445	246	13	4.23	100	CDS	168	43.4	-1	DNA-binding phage protein	COG3636	Phage	Proteobacteria	Gammaproteobacteria				Sulfuricaulis limicola
DN32374_c0_g1	445	246	13	4.2	DN32374_c0_g1_i1	G137155	G1371552	2	445	246	13	4.23	100	CDS	300	59.34	-1	putative component of toxin-antitoxin plasmid stabilization module	COG3657	Phage	Proteobacteria	Gammaproteobacteria				Thioalkalivibrio thiocyanodenitrificans
DN47671_c0_g1	395	196	14	5.7	DN47671_c0_g1_i1	G133882	G1338821		395	196	14	5.72	100	CDS	390	69.53	1	uncharacterized phage-associated protein	COG3600	Phage	Proteobacteria	Alphaproteobacteria	Rhodospirillales	Rhodospirillaceae	Azospirillum	Azospirillum lipoferum
DN18461_c0_g1	390	191	8	3.4	DN18461_c0_g1_i1	G133451	G1334511		390	191	8	3.35	100	CDS	204	75.44	1	prophage regulatory protein	KO:K07733	Phage	Proteobacteria	Alphaproteobacteria	Rhodobacterales	Rhodobacteraceae	Roseovarius	Roseovarius pacificus
DN44759_c0_g1	385	186	4	1.7	DN44759_c0_g1_i1	G133098	G1330981		385	186	4	1.72	100	CDS	327	80.56	-1	bacteriophage replication gene A protein	pfam05840	Phage	Proteobacteria	Gammaproteobacteria	Thiotrichales	Piscirickettsiaceae	Methylophaga	Methylophaga sp. SM14
DN31173_c0_g1	380	181	9	4	DN31173_c0_g1_i1	G132646	G1326461	1	380	181	9	3.98	100	CDS	129	100	1	phage-related protein	COG4679	Phage	Bacteroidetes	Flavobacteriia	Flavobacteriales	Flavobacteriaceae		Jejuia pallidilutea
DN31173_c0_g1	380	181	9	4	DN31173_c0_g1_i1	G132646	G1326462	2	380	181	9	3.98	100	CDS	261	100	1	transcriptional regulator with XRE-family HTH domain	COG1396	Phage	Bacteroidetes	Flavobacteriia	Flavobacteriales	Flavobacteriaceae		Nonlabens sediminis
DN39231_c0_g1	342	143	6	3.4	DN39231_c0_g1_i1	G129028	G1290281		342	143	6	3.36	100	CDS	342	65.56	-1	prophage antirepressor-like protein	COG3617	Phage	Proteobacteria	Deltaproteobacteria	Desulfobacterales	Desulfobulbaceae	Desulfobulbus	Desulfobulbus elongatus
DN21227_c0_g1	340	141	4	2.3	DN21227_c0_g1_i1	G128750	G1287501		340	141	4	2.27	100	CDS	294	84.21	-1	phage-related protein	COG4679	Phage	Bacteroidetes	Flavobacteriia	Flavobacteriales	Flavobacteriaceae	Joostella	Joostella marina
DN22902_c0_g1	312	113	7	5	DN22902_c0_g1_i1	G125162	G1251621		312	113	7	4.96	100	CDS	312	64.08	-1	phage derived Gp49-like protein DUF891	pfam05973	Phage	Bacteroidetes	Bacteroidia	Marinilabiliales	Marinilabiliaceae	Marinilabilia	Marinilabilia salmonicolor
DN15260_c0_g1	310	111	5	3.6	DN15260_c0_g1_i1	G124854	G1248541		310	111	5	3.61	100	CDS	309	77.67	1	bacteriophage replication gene A protein	pfam05840	Phage	Proteobacteria	Gammaproteobacteria	Thiotrichales	Piscirickettsiaceae	Methylophaga	Methylophaga sp. SM14
DN47725_c0_g1	308	109	2	1.5	DN47725_c0_g1_i1	G124639	G1246391	1	308	109	2	1.47	100	CDS	219	60	1	uncharacterized phage protein gp47/JayE	COG3299	Phage	Proteobacteria	Gammaproteobacteria	Thiotrichales	Piscirickettsiaceae	Methylophaga	Methylophaga thiooxydans
DN47725_c0_g1	308	109	2	1.5	DN47725_c0_g1_i1	G124639	G1246392	2	308	109	2	1.47	100	CDS	84	#N/A	1	HP	HPrule	Phage	Proteobacteria	Gammaproteobacteria	Thiotrichales	Piscirickettsiaceae	Methylophaga	#N/A
DN6995_c0_g1	307	108	3	2.2	DN6995_c0_g1_i2	G124522	G1245221		307	108	3	2.22	100	CDS	306	52	-1	phage gp29-like protein	COG4383	Phage	Proteobacteria	Gammaproteobacteria	Thiotrichales	Piscirickettsiaceae	Methylophaga	Methylophaga sp. SM14
DN17710_c0_g1	294	95	7	5.9	DN17710_c0_g1_i1	G122343	G1223431	1	294	95.04	7	5.9	100	CDS	153	93.33	1	putative component of toxin-antitoxin plasmid stabilization module	COG3657	Phage	Proteobacteria	Alphaproteobacteria	Rhodospirillales	Rhodospirillaceae	Oceanibaculum	Oceanibaculum indicum
DN17710_c0_g1	294	95	7	5.9	DN17710_c0_g1_i1	G122343	G1223432	2	294	95.04	7	5.9	100	CDS	123	97.56	1	DNA-binding phage protein	COG3636	Phage	Proteobacteria	Alphaproteobacteria	Rhodospirillales	Rhodospirillaceae	Oceanibaculum	Oceanibaculum indicum
DN5319_c0_g1	283	84.4	6	5.7	DN5319_c0_g1_i1	G120532	G1205321		283	84.42	6	5.69	100	CDS	264	68.83	1	DNA-binding phage protein	COG3636	Phage	Proteobacteria	Gammaproteobacteria	Cellvibrionales	Spongiibacteraceae	Oceanicoccus	Oceanicoccus sagamiensis
DN40941_c0_g1	269	71.6	7	7.8	DN40941_c0_g1_i1	G117749	G1177491	1	269	71.55	7	7.83	100	CDS	99	86.67	1	prophage regulatory protein	KO:K07733	Phage	Proteobacteria	Gammaproteobacteria	Thiotrichales	Piscirickettsiaceae	Methylophaga	Methylophaga sp. SM14
DN40941_c0_g1	269	71.6	7	7.8	DN40941_c0_g1_i1	G117749	G1177492	2	269	71.55	7	7.83	100	CDS	171	#N/A	1	HP	HPrule	Phage	Proteobacteria	Gammaproteobacteria	Thiotrichales	Piscirickettsiaceae	Methylophaga	#N/A
DN27497_c0_g1	265	68	3	3.5	DN27497_c0_g1_i1	G116869	G1168691		265	68.02	3	3.53	100	CDS	264	100	1	phage-related protein	COG4679	Phage	Proteobacteria	Alphaproteobacteria	Rhizobiales	Phyllobacteriaceae	Nitratireductor	Nitratireductor aquibiodomus
DN13381_c0_g1	256	60.4	4	5.3	DN13381_c0_g1_i1	G114823	G1148231		256	60.35	4	5.31	100	CDS	255	70.93	-1	phage repressor protein C with HTH and peptisase S24 domain	COG2932	Phage	Proteobacteria	Gammaproteobacteria	Oceanospirillales	Oceanospirillaceae	Marinobacterium	Marinobacterium stanieri
DN1610_c0_g1	254	58.7	2	2.7	DN1610_c0_g1_i1	G114370	G1143701		254	58.7	2	2.73	100	CDS	252	#N/A	-1	phage I-like protein	COG4388	Phage	#N/A	#N/A	#N/A	#N/A	#N/A	#N/A
DN27239_c0_g1	249	54.7	3	4.4	DN27239_c0_g1_i1	G113265	G1132651		249	54.65	3	4.4	100	CDS	246	73.17	-1	uncharacterized phage-associated protein	COG3600	Phage	Proteobacteria	Alphaproteobacteria	Rhodobacterales	Rhodobacteraceae	Ruegeria	Ruegeria halocynthiae
DN17666_c0_g1	247	53.1	1	1.5	DN17666_c0_g1_i2	G112688	G1126881	1	247	53.07	1	1.51	100	CDS	246	61.4	-1	phage gp46-like protein	COG4381	Phage	Proteobacteria	Gammaproteobacteria				Salmonella enterica
DN17666_c0_g1	247	53.1	1	1.5	DN17666_c0_g1_i1	G121647	G1216471	1	290	91.14	0	0	0	CDS	237	61.4	-1	phage gp46-like protein	COG4381	Phage	Proteobacteria	Gammaproteobacteria	Enterobacterales	Enterobacteriaceae	Salmonella	Salmonella enterica
DN35740_c0_g1	244	50.7	8	12.6	DN35740_c0_g1_i1	G111995	G1119951		244	50.74	8	12.63	100	CDS	240	98.75	-1	phage derived Gp49-like protein DUF891	pfam05973	Phage	Bacteroidetes	Flavobacteriia	Flavobacteriales	Flavobacteriaceae	Bizionia	Bizionia echini
DN47801_c0_g1	239	47	13	22.2	DN47801_c0_g1_i1	G110691	G1106911		239	46.96	13	22.17	100	CDS	216	#N/A	1	virion coat protein B	pfam10389	Phage	#N/A	#N/A	#N/A	#N/A	#N/A	#N/A
DN41241_c0_g1	237	45.5	4	7	DN41241_c0_g1_i1	G110123	G1101231		237	45.49	4	7.04	100	CDS	237	97.47	-1	phage repressor protein C with HTH and peptisase S24 domain	COG2932	Phage	Bacteroidetes	Flavobacteriia	Flavobacteriales	Flavobacteriaceae	Aequorivita	Vitellibacter aquimaris
DN33517_c0_g1	235	44	2	3.6	DN33517_c0_g1_i1	G109531	G1095311		235	44.04	2	3.64	100	CDS	102	94.12	1	prophage regulatory protein	KO:K07733	Phage	Proteobacteria	Gammaproteobacteria	Thiotrichales	Piscirickettsiaceae	Methylophaga	Methylophaga sp. SM14
DN7678_c0_g1	228	39.1	1	2.1	DN7678_c0_g1_i1	G107810	G1078101		228	39.14	1	2.05	100	CDS	180	62.96	-1	phage gp36-like protein	COG4387	Phage	Proteobacteria	Gammaproteobacteria	Thiotrichales	Piscirickettsiaceae	Methylophaga	Methylophaga sp. SM14
DN15396_c0_g1	221	34.5	4	9.3	DN15396_c0_g1_i1	G105664	G1056641		221	34.54	4	9.27	100	CDS	219	60.27	1	predicted phage gp36 major capsid-like protein	COG4653	Phage	Proteobacteria	Alphaproteobacteria	Rhodospirillales	Rhodospirillaceae	Oceanibaculum	Oceanibaculum indicum
DN8780_c0_g1	216	31.4	3	7.7	DN8780_c0_g1_i1	G102787	G1027871	1	210	27.9	1.6	4.58	59.79	CDS	207	66.1	-1	phage gp29-like protein	COG4383	Phage	Proteobacteria	Gammaproteobacteria	Thiotrichales	Piscirickettsiaceae	Methylophaga	Methylophaga thiooxydans
DN12614_c0_g1	215	30.8	3	7.8	DN12614_c0_g1_i1	G103986	G1039861		215	30.82	3	7.79	100	CDS	180	100	1	phage repressor protein C with HTH and peptisase S24 domain	COG2932	Phage	Proteobacteria	Alphaproteobacteria	Rhodobacterales	Rhodobacteraceae	Stappia	Stappia indica
DN983_c0_g1	215	30.8	1	2.6	DN983_c0_g1_i1	G104227	G1042271		215	30.82	1	2.6	100	CDS	213	64.18	-1	bacteriophage Mu transposase	pfam02914	Phage	Proteobacteria	Gammaproteobacteria	Thiotrichales	Piscirickettsiaceae	Methylophaga	Methylophaga sp. SM14
DN9765_c0_g1	214	30.3	8	21.1	DN9765_c0_g1_i6	G101069	G1010691	1	204	24.6	2	6.51	30.82	CDS	201	55.17	-1	uncharacterized phage protein gp47/JayE	COG3299	Phage						Methylophaga sp. SM14
DN9765_c0_g1	214	30.3	8	21.1	DN9765_c0_g1_i3	G108072	G1080721	1	229	39.82	1.66	3.33	15.76	CDS	189	61.9	-1	baseplate J-like protein	pfam04865	Phage						Achromobacter sp. 2789STDY5663443
DN19702_c0_g1	213	29.6	5	13.5	DN19702_c0_g1_i1	G103425	G1034251		213	29.64	5	13.51	100	CDS	210	77.94	-1	phage derived Gp49-like protein DUF891	pfam05973	Phage	Bacteroidetes	Bacteroidia	Marinilabiliales	Prolixibacteraceae	Tangfeifania	Tangfeifania diversioriginum
DN6389_c0_g2	204	24.6	1	3.3	DN6389_c0_g2_i1	G101052	G1010521		204	24.6	1	3.26	100	CDS	204	83.64	1	phage FluMu gp28-like protein	COG4373	Phage	Proteobacteria	Gammaproteobacteria	Thiotrichales	Piscirickettsiaceae	Thiomicrospira	unclassified Thiomicrospira
DN838_c1_g1	204	24.6	2	6.5	DN838_c1_g1_i1	G101059	G1010591		204	24.6	2	6.51	100	CDS	189	#N/A	1	phage tail sheath gpL-like	COG4386	Phage	#N/A	#N/A	#N/A	#N/A	#N/A	#N/A
DN838_c2_g1	204	24.6	0	0	DN838_c2_g1_i1	G101060	G1010601		204	24.6	0	0	0	CDS	204	76.67	-1	phage tail sheath gpL-like	COG4386	Phage	Proteobacteria	Gammaproteobacteria	Thiotrichales	Piscirickettsiaceae	Methylophaga	Methylophaga thiooxydans
DN6389_c0_g1	203	24.1	2	6.7	DN6389_c0_g1_i1	G100799	G1007991		203	24.07	2	6.65	100	CDS	186	84.21	-1	phage FluMu gp28-like protein	COG4373	Phage	Proteobacteria	Gammaproteobacteria	Thiotrichales	Piscirickettsiaceae	Methylophaga	Methylophaga sp. SM14
DN9037_c0_g1	203	24.1	3	10	DN9037_c0_g1_i1	G100815	G1008151		203	24.07	3	9.98	100	CDS	195	86.36	1	phage FluMu gp28-like protein	COG4373	Phage	Proteobacteria	Gammaproteobacteria	Thiotrichales	Piscirickettsiaceae	Methylophaga	Methylophaga thiooxydans
DN11515_c2_g1	20711	20511.7	10511	41	DN11515_c2_g1_i3	G151346	G1513461	1	22725	22526	10285.4	36.56	89.1	CDS	498	65.03	1	HP	HPrule	Plasmid	Proteobacteria	Gammaproteobacteria				Edwardsiella tarda
DN11515_c2_g1	20711	20511.7	10511	41	DN11515_c2_g1_i3	G151346	G1513462	2	22725	22526	10285.4	36.56	89.1	CDS	522	70.35	1	mobilization protein MobC	pfam05713	Plasmid	Proteobacteria	Gammaproteobacteria				Edwardsiella tarda
DN11515_c2_g1	20711	20511.7	10511	41	DN11515_c2_g1_i3	G151346	G1513463	3	22725	22526	10285.4	36.56	89.1	CDS	999	83.48	1	type IV secretory pathway VirD2 relaxase	COG3843	Plasmid	Proteobacteria	Gammaproteobacteria				Edwardsiella tarda
DN11515_c2_g1	20711	20511.7	10511	41	DN11515_c2_g1_i3	G151346	G1513464	4	22725	22526	10285.4	36.56	89.1	CDS	543	51.65	1	HP	HPrule	Plasmid	Proteobacteria	Gammaproteobacteria				Vibrio parahaemolyticus
DN11515_c2_g1	20711	20511.7	10511	41	DN11515_c2_g1_i3	G151346	G1513465	5	22725	22526	10285.4	36.56	89.1	CDS	204	#N/A	-1	HP	HPrule	Plasmid	Proteobacteria	Gammaproteobacteria				#N/A
DN11515_c2_g1	20711	20511.7	10511	41	DN11515_c2_g1_i3	G151346	G1513467	7	22725	22526	10285.4	36.56	89.1	CDS	1524	78.63	-1	antirestriction protein ArdC	COG4227	Plasmid	Proteobacteria	Gammaproteobacteria				Edwardsiella tarda
DN11515_c2_g1	20711	20511.7	10511	41	DN11515_c2_g1_i3	G151346	G1513468	8	22725	22526	10285.4	36.56	89.1	CDS	156	86.05	-1	HP	HPrule	Plasmid	Proteobacteria	Gammaproteobacteria				Edwardsiella tarda
DN11515_c2_g1	20711	20511.7	10511	41	DN11515_c2_g1_i3	G151346	G1513469	9	22725	22526	10285.4	36.56	89.1	CDS	2724	59.21	-1	phage/plasmid primase-like uncharacterized protein	COG4643	Plasmid	Proteobacteria	Gammaproteobacteria				Vibrio parahaemolyticus
DN11515_c2_g1	20711	20511.7	10511	41	DN11515_c2_g1_i3	G151346	G15134610	10	22725	22526	10285.4	36.56	89.1	CDS	1914	83.72	-1	type IV secretion system protein VirD4	KO:K03205	Plasmid	Proteobacteria	Gammaproteobacteria				Edwardsiella tarda
DN11515_c2_g1	20711	20511.7	10511	41	DN11515_c2_g1_i3	G151346	G15134611	11	22725	22526	10285.4	36.56	89.1	CDS	1032	90.96	-1	type IV secretion system protein VirB11	KO:K03196	Plasmid	Proteobacteria	Gammaproteobacteria				Edwardsiella tarda
DN11515_c2_g1	20711	20511.7	10511	41	DN11515_c2_g1_i3	G151346	G15134612	12	22725	22526	10285.4	36.56	89.1	CDS	1188	76.72	-1	type IV secretion system protein VirB10	KO:K03195	Plasmid	Proteobacteria	Gammaproteobacteria				Edwardsiella tarda
DN11515_c2_g1	20711	20511.7	10511	41	DN11515_c2_g1_i3	G151346	G15134613	13	22725	22526	10285.4	36.56	89.1	CDS	834	86.28	-1	type IV secretion system protein VirB9	KO:K03204	Plasmid	Proteobacteria	Gammaproteobacteria				Piscirickettsia salmonis
DN11515_c2_g1	20711	20511.7	10511	41	DN11515_c2_g1_i3	G151346	G15134614	14	22725	22526	10285.4	36.56	89.1	CDS	741	82.11	-1	type IV secretion system protein VirB8	KO:K03203	Plasmid	Proteobacteria	Gammaproteobacteria				Edwardsiella tarda
DN11515_c2_g1	20711	20511.7	10511	41	DN11515_c2_g1_i3	G151346	G15134615	15	22725	22526	10285.4	36.56	89.1	CDS	216	74.55	-1	HP	HPrule	Plasmid	Proteobacteria	Gammaproteobacteria				Piscirickettsia salmonis
DN11515_c2_g1	20711	20511.7	10511	41	DN11515_c2_g1_i3	G151346	G15134616	16	22725	22526	10285.4	36.56	89.1	CDS	1005	62.99	-1	type IV secretion system protein VirB6	KO:K03201	Plasmid	Proteobacteria	Gammaproteobacteria				Edwardsiella tarda
DN11515_c2_g1	20711	20511.7	10511	41	DN11515_c2_g1_i3	G151346	G15134617	17	22725	22526	10285.4	36.56	89.1	CDS	246	54.43	-1	HP	HPrule	Plasmid	Proteobacteria	Gammaproteobacteria				Providencia alcalifaciens
DN11515_c2_g1	20711	20511.7	10511	41	DN11515_c2_g1_i3	G151346	G15134618	18	22725	22526	10285.4	36.56	89.1	CDS	621	76.1	-1	type IV secretion system protein VirB5	KO:K03200	Plasmid	Proteobacteria	Gammaproteobacteria				Edwardsiella tarda
DN11515_c2_g1	20711	20511.7	10511	41	DN11515_c2_g1_i3	G151346	G15134619	19	22725	22526	10285.4	36.56	89.1	CDS	2460	85.91	-1	type IV secretion system protein VirB4	KO:K03199	Plasmid	Proteobacteria	Gammaproteobacteria				Edwardsiella tarda
DN11515_c2_g1	20711	20511.7	10511	41	DN11515_c2_g1_i3	G151346	G15134620	20	22725	22526	10285.4	36.56	89.1	CDS	315	80	-1	type IV secretion system protein VirB3	KO:K03198	Plasmid	Proteobacteria	Gammaproteobacteria				Piscirickettsia salmonis
DN11515_c2_g1	20711	20511.7	10511	41	DN11515_c2_g1_i3	G151346	G15134621	21	22725	22526	10285.4	36.56	89.1	CDS	336	81.08	-1	type IV secretion system protein VirB2	KO:K03197	Plasmid	Proteobacteria	Gammaproteobacteria				Piscirickettsia salmonis
DN11515_c2_g1	20711	20511.7	10511	41	DN11515_c2_g1_i3	G151346	G15134622	22	22725	22526	10285.4	36.56	89.1	CDS	375	79.51	-1	HP	HPrule	Plasmid	Proteobacteria	Gammaproteobacteria				Edwardsiella tarda
DN11515_c2_g1	20711	20511.7	10511	41	DN11515_c2_g1_i3	G151346	G15134623	23	22725	22526	10285.4	36.56	89.1	CDS	1974	89.04	-1	DNA topoisomerase-1	KO:K03168	Plasmid	Proteobacteria	Gammaproteobacteria				Edwardsiella tarda
DN11515_c2_g1	20711	20511.7	10511	41	DN11515_c2_g1_i3	G151346	G15134624	24	22725	22526	10285.4	36.56	89.1	CDS	738	79.18	-1	spore germination cell wall hydrolase CwlJ-like protein	COG3773	Plasmid	Proteobacteria	Gammaproteobacteria				Edwardsiella tarda
DN11515_c2_g1	20711	20511.7	10511	41	DN11515_c2_g1_i3	G151346	G15134625	25	22725	22526	10285.4	36.56	89.1	CDS	477	54.04	-1	HP	HPrule	Plasmid	Proteobacteria	Gammaproteobacteria				Edwardsiella tarda
DN11383_c0_g1	18485	18286.5	5533	24.2	DN11383_c0_g1_i2	G151344	G1513441	1	19378	19179	4885.38	20.4	84.19	CDS	204	#N/A	-1	HP	HPrule	Plasmid	Proteobacteria					#N/A
DN11383_c0_g1	18485	18286.5	5533	24.2	DN11383_c0_g1_i2	G151344	G1513442	2	19378	19179	4885.38	20.4	84.19	CDS	1890	56.21	-1	putative DNA primase/helicase	KO:K06919	Plasmid	Proteobacteria					Burkholderia pseudomallei
DN11383_c0_g1	18485	18286.5	5533	24.2	DN11383_c0_g1_i2	G151344	G1513443	3	19378	19179	4885.38	20.4	84.19	CDS	702	53.68	-1	HP	HPrule	Plasmid	Proteobacteria					Thiomonas intermedia
DN11383_c0_g1	18485	18286.5	5533	24.2	DN11383_c0_g1_i2	G151344	G1513444	4	19378	19179	4885.38	20.4	84.19	CDS	2517	65.61	-1	type IV secretion system protein VirD4	KO:K03205	Plasmid	Proteobacteria					Burkholderia pseudomallei
DN11383_c0_g1	18485	18286.5	5533	24.2	DN11383_c0_g1_i2	G151344	G1513446	6	19378	19179	4885.38	20.4	84.19	CDS	1083	83.84	-1	type IV secretion system protein VirB11	KO:K03196	Plasmid	Proteobacteria					Pseudomonas aeruginosa
DN11383_c0_g1	18485	18286.5	5533	24.2	DN11383_c0_g1_i2	G151344	G1513447	7	19378	19179	4885.38	20.4	84.19	CDS	1155	58.66	-1	type IV secretion system protein VirB10	KO:K03195	Plasmid	Proteobacteria					Thiomonas intermedia
DN11383_c0_g1	18485	18286.5	5533	24.2	DN11383_c0_g1_i2	G151344	G1513448	8	19378	19179	4885.38	20.4	84.19	CDS	879	72.57	-1	type IV secretion system protein VirB9	KO:K03204	Plasmid	Proteobacteria					Thiomonas intermedia
DN11383_c0_g1	18485	18286.5	5533	24.2	DN11383_c0_g1_i2	G151344	G1513449	9	19378	19179	4885.38	20.4	84.19	CDS	726	61.57	-1	type IV secretion system protein VirB8	KO:K03203	Plasmid	Proteobacteria					Burkholderia pseudomallei
DN11383_c0_g1	18485	18286.5	5533	24.2	DN11383_c0_g1_i2	G151344	G15134411	11	19378	19179	4885.38	20.4	84.19	CDS	1077	61.04	-1	type IV secretion system protein VirB6	KO:K03201	Plasmid	Proteobacteria					unclassified Sulfuriferula
DN11383_c0_g1	18485	18286.5	5533	24.2	DN11383_c0_g1_i2	G151344	G15134412	12	19378	19179	4885.38	20.4	84.19	CDS	243	67.09	-1	HP	HPrule	Plasmid	Proteobacteria					unclassified Sulfuriferula
DN11383_c0_g1	18485	18286.5	5533	24.2	DN11383_c0_g1_i2	G151344	G15134413	13	19378	19179	4885.38	20.4	84.19	CDS	714	67.39	-1	type IV secretion system protein VirB5	KO:K03200	Plasmid	Proteobacteria					Comamonas aquatica
DN11383_c0_g1	18485	18286.5	5533	24.2	DN11383_c0_g1_i2	G151344	G15134414	14	19378	19179	4885.38	20.4	84.19	CDS	2523	76.19	-1	type IV secretion system protein VirB4/type IV secretion system protein PtlC	KO:K03199,KO:K12080	Plasmid	Proteobacteria					Pseudomonas aeruginosa
DN11383_c0_g1	18485	18286.5	5533	24.2	DN11383_c0_g1_i2	G151344	G15134415	15	19378	19179	4885.38	20.4	84.19	CDS	318	77.57	-1	type IV secretion system protein VirB3	KO:K03198	Plasmid	Proteobacteria					Burkholderia pseudomallei
DN11383_c0_g1	18485	18286.5	5533	24.2	DN11383_c0_g1_i2	G151344	G15134416	16	19378	19179	4885.38	20.4	84.19	CDS	315	66.02	-1	type IV secretion system protein VirB2/type IV secretion system protein PtlA	KO:K03197,KO:K12078	Plasmid	Proteobacteria					Burkholderia pseudomallei
DN11383_c0_g1	18485	18286.5	5533	24.2	DN11383_c0_g1_i2	G151344	G15134417	17	19378	19179	4885.38	20.4	84.19	CDS	2316	70.43	-1	DNA topoisomerase-1	KO:K03168	Plasmid	Proteobacteria					Burkholderia pseudomallei
DN11383_c0_g1	18485	18286.5	5533	24.2	DN11383_c0_g1_i2	G151344	G15134418	18	19378	19179	4885.38	20.4	84.19	CDS	744	62.3	-1	type IV secretion system protein VirB1	KO:K03194	Plasmid	Proteobacteria					Burkholderia pseudomallei
DN11383_c0_g1	18485	18286.5	5533	24.2	DN11383_c0_g1_i2	G151344	G15134419	19	19378	19179	4885.38	20.4	84.19	CDS	372	58.68	-1	HP	HPrule	Plasmid	Proteobacteria					Thiomonas intermedia
DN11219_c0_g1	17961	17762	3090	13.9	DN11219_c0_g1_i1	G151343	G1513431	1	17961	17762	3090	13.93	100	CDS	213	100	1	HP	HPrule	Plasmid	Proteobacteria	Gammaproteobacteria	Vibrionales	Vibrionaceae		Vibrio cholerae
DN11219_c0_g1	17961	17762	3090	13.9	DN11219_c0_g1_i1	G151343	G1513432	2	17961	17762	3090	13.93	100	CDS	1308	97.47	-1	DNA polymerase V	KO:K03502	Plasmid	Proteobacteria	Gammaproteobacteria	Vibrionales	Vibrionaceae		Vibrio mytili
DN11219_c0_g1	17961	17762	3090	13.9	DN11219_c0_g1_i1	G151343	G1513433	3	17961	17762	3090	13.93	100	CDS	450	100	-1	DNA polymerase V	KO:K03503	Plasmid	Proteobacteria	Gammaproteobacteria	Vibrionales	Vibrionaceae		Rheinheimera sp. KL1
DN11219_c0_g1	17961	17762	3090	13.9	DN11219_c0_g1_i1	G151343	G1513434	4	17961	17762	3090	13.93	100	CDS	258	92.94	1	HP	HPrule	Plasmid	Proteobacteria	Gammaproteobacteria	Vibrionales	Vibrionaceae		Vibrio cholerae
DN11219_c0_g1	17961	17762	3090	13.9	DN11219_c0_g1_i1	G151343	G1513435	5	17961	17762	3090	13.93	100	CDS	906	99	1	DNA polymerase-3 subunit epsilon	KO:K02342	Plasmid	Proteobacteria	Gammaproteobacteria	Vibrionales	Vibrionaceae		Vibrio alginolyticus
DN11219_c0_g1	17961	17762	3090	13.9	DN11219_c0_g1_i1	G151343	G1513436	6	17961	17762	3090	13.93	100	CDS	300	97.98	1	HP	HPrule	Plasmid	Proteobacteria	Gammaproteobacteria	Vibrionales	Vibrionaceae		Methylophaga frappieri
DN11219_c0_g1	17961	17762	3090	13.9	DN11219_c0_g1_i1	G151343	G1513437	7	17961	17762	3090	13.93	100	CDS	954	97.16	1	predicted DNA-binding transcriptional regulator YafY	COG2378	Plasmid	Proteobacteria	Gammaproteobacteria	Vibrionales	Vibrionaceae		Vibrio nigripulchritudo
DN11219_c0_g1	17961	17762	3090	13.9	DN11219_c0_g1_i1	G151343	G1513438	8	17961	17762	3090	13.93	100	CDS	1836	91.65	1	adenine-specific DNA-methyltransferase	KO:K07316	Plasmid	Proteobacteria	Gammaproteobacteria	Vibrionales	Vibrionaceae		Pantoea agglomerans
DN11219_c0_g1	17961	17762	3090	13.9	DN11219_c0_g1_i1	G151343	G1513439	9	17961	17762	3090	13.93	100	CDS	2652	99.09	1	type III restriction enzyme	KO:K01156	Plasmid	Proteobacteria	Gammaproteobacteria	Vibrionales	Vibrionaceae		Vibrio hepatarius
DN11219_c0_g1	17961	17762	3090	13.9	DN11219_c0_g1_i1	G151343	G15134310	10	17961	17762	3090	13.93	100	CDS	3882	98.53	1	HP	HPrule	Plasmid	Proteobacteria	Gammaproteobacteria	Vibrionales	Vibrionaceae		Vibrio nigripulchritudo
DN11219_c0_g1	17961	17762	3090	13.9	DN11219_c0_g1_i1	G151343	G15134311	11	17961	17762	3090	13.93	100	CDS	2427	100	1	HP	HPrule	Plasmid	Proteobacteria	Gammaproteobacteria	Vibrionales	Vibrionaceae		Vibrio nigripulchritudo
DN11219_c0_g1	17961	17762	3090	13.9	DN11219_c0_g1_i1	G151343	G15134312	12	17961	17762	3090	13.93	100	CDS	1182	99.75	1	RecB family endonuclease NucS	COG1637	Plasmid	Proteobacteria	Gammaproteobacteria	Vibrionales	Vibrionaceae		Vibrio nigripulchritudo
DN11219_c0_g1	17961	17762	3090	13.9	DN11219_c0_g1_i1	G151343	G15134313	13	17961	17762	3090	13.93	100	CDS	411	100	1	conjugal transfer pilus assembly protein TraI	KO:K12070	Plasmid	Proteobacteria	Gammaproteobacteria	Vibrionales	Vibrionaceae		Vibrio nigripulchritudo
DN11504_c0_g2	5728	5529.3	12314	178.3	DN11504_c0_g2_i1	G151237	G1512371	1	5720	5521	11782.9	170.9	95.83	CDS	666	84.93	-1	HP	HPrule	Plasmid	Proteobacteria	Gammaproteobacteria				Edwardsiella tarda
DN11504_c0_g2	5728	5529.3	12314	178.3	DN11504_c0_g2_i1	G151237	G1512372	2	5720	5521	11782.9	170.9	95.83	CDS	312	86.41	-1	plasmid maintenance system antidote protein VapI	COG3093	Plasmid	Proteobacteria	Gammaproteobacteria				Edwardsiella tarda
DN11504_c0_g2	5728	5529.3	12314	178.3	DN11504_c0_g2_i1	G151237	G1512373	3	5720	5521	11782.9	170.9	95.83	CDS	213	#N/A	1	HP	HPrule	Plasmid	Proteobacteria	Gammaproteobacteria				#N/A
DN11504_c0_g2	5728	5529.3	12314	178.3	DN11504_c0_g2_i1	G151237	G1512374	4	5720	5521	11782.9	170.9	95.83	CDS	183	82.76	1	carbon storage regulator	KO:K03563	Plasmid	Proteobacteria	Gammaproteobacteria				Ectothiorhodospira magna
DN11504_c0_g2	5728	5529.3	12314	178.3	DN11504_c0_g2_i1	G151237	G1512376	6	5720	5521	11782.9	170.9	95.83	CDS	237	47.44	1	HP	HPrule	Plasmid	Proteobacteria	Gammaproteobacteria				Thioalkalivibrio sp. ALgr3
DN11504_c0_g2	5728	5529.3	12314	178.3	DN11504_c0_g2_i1	G151237	G1512377	7	5720	5521	11782.9	170.9	95.83	CDS	843	62.86	1	DNA polymerase III epsilon subunit-like protein	COG0847	Plasmid	Proteobacteria	Gammaproteobacteria				Oblitimonas alkaliphila
DN11504_c0_g2	5728	5529.3	12314	178.3	DN11504_c0_g2_i1	G151237	G1512379	9	5720	5521	11782.9	170.9	95.83	CDS	633	82.38	1	DNA invertase Pin-like site-specific DNA recombinase	COG1961	Plasmid	Proteobacteria	Gammaproteobacteria				Edwardsiella tarda
DN11504_c0_g2	5728	5529.3	12314	178.3	DN11504_c0_g2_i1	G151237	G15123710	10	5720	5521	11782.9	170.9	95.83	CDS	1059	83.43	-1	adenine/guanine phosphoribosyltransferase-like PRPP-binding protein	COG0503	Plasmid	Proteobacteria	Gammaproteobacteria				Edwardsiella tarda
DN11504_c0_g2	5728	5529.3	12314	178.3	DN11504_c0_g2_i1	G151237	G15123711	11	5720	5521	11782.9	170.9	95.83	CDS	372	83.18	-1	HP	HPrule	Plasmid	Proteobacteria	Gammaproteobacteria				Piscirickettsia salmonis
DN10843_c0_g1	5229	5030.1	821	13.1	DN10843_c0_g1_i2	G150897	G1508971	1	2812	2613	209	6.4	49.01	CDS	147	100	1	conjugal transfer pilus assembly protein TraB	KO:K12065	Plasmid	Proteobacteria	Gammaproteobacteria				Vibrio nigripulchritudo
DN10843_c0_g1	5229	5030.1	821	13.1	DN10843_c0_g1_i2	G150897	G1508972	2	2812	2613	209	6.4	49.01	CDS	573	100	1	conjugal transfer pilus assembly protein TraV	KO:K12064	Plasmid	Proteobacteria	Gammaproteobacteria				Proteus mirabilis
DN10843_c0_g1	5229	5030.1	821	13.1	DN10843_c0_g1_i2	G150897	G1508973	3	2812	2613	209	6.4	49.01	CDS	387	99.22	1	conjugal transfer pilus assembly protein TraA	KO:K12069	Plasmid	Proteobacteria	Gammaproteobacteria				Vibrio cholerae
DN10843_c0_g1	5229	5030.1	821	13.1	DN10843_c0_g1_i2	G150897	G1508974	4	2812	2613	209	6.4	49.01	CDS	822	100	1	transcriptional regulator with AbiEi antitoxin domain of type IV toxin-antitoxin system/transcriptional regulator with AbiEi antitoxin domain of type IV toxin-antitoxin system	pfam11459,pfam17194	Plasmid	Proteobacteria	Gammaproteobacteria				Vibrio nigripulchritudo
DN10843_c0_g1	5229	5030.1	821	13.1	DN10843_c0_g1_i2	G150897	G1508975	5	2812	2613	209	6.4	49.01	CDS	627	100	1	predicted nucleotidyltransferase component of viral defense system	COG2253	Plasmid	Proteobacteria	Gammaproteobacteria				Vibrio nigripulchritudo
DN10843_c0_g1	5229	5030.1	821	13.1	DN10843_c0_g1_i1	G151293	G1512931	1	7552	7353	612	6.66	50.99	CDS	2490	99.88	1	superfamily I DNA and/or RNA helicase/superfamily I DNA and/or RNA helicase	COG1112,COG1112	Plasmid	Proteobacteria	Gammaproteobacteria				Alteromonas sp. Mex14
DN10843_c0_g1	5229	5030.1	821	13.1	DN10843_c0_g1_i1	G151293	G1512932	2	7552	7353	612	6.66	50.99	CDS	1110	100	1	HP	HPrule	Plasmid	Proteobacteria	Gammaproteobacteria				Vibrio nigripulchritudo
DN10843_c0_g1	5229	5030.1	821	13.1	DN10843_c0_g1_i1	G151293	G1512933	3	7552	7353	612	6.66	50.99	CDS	1533	100	1	phosphatidylserine/phosphatidylglycerophosphate/cardiolipin synthase-like enzyme/phosphatidylserine/phosphatidylglycerophosphate/cardiolipin synthase-like enzyme	COG1502,COG1502	Plasmid	Proteobacteria	Gammaproteobacteria				Vibrio nigripulchritudo
DN10843_c0_g1	5229	5030.1	821	13.1	DN10843_c0_g1_i1	G151293	G1512934	4	7552	7353	612	6.66	50.99	CDS	1446	100	1	transcriptional regulator with AAA-type ATPase domain	COG1221	Plasmid	Proteobacteria	Gammaproteobacteria				Alteromonas sp. Mex14
DN10843_c0_g1	5229	5030.1	821	13.1	DN10843_c0_g1_i1	G151293	G1512935	5	7552	7353	612	6.66	50.99	CDS	369	100	1	HP	HPrule	Plasmid	Proteobacteria	Gammaproteobacteria				Vibrio fluvialis
DN10689_c0_g1	4702	4502.8	2261	40.2	DN10689_c0_g1_i2	G151183	G1511831	1	4674	4475	2130.87	38.13	94.83	CDS	153	100	-1	conjugal transfer pilus assembly protein TraB	KO:K12065	Plasmid	Proteobacteria	Gammaproteobacteria				Vibrio metoecus
DN10689_c0_g1	4702	4502.8	2261	40.2	DN10689_c0_g1_i2	G151183	G1511832	2	4674	4475	2130.87	38.13	94.83	CDS	897	98.66	-1	conjugal transfer pilus assembly protein TraK	KO:K12066	Plasmid	Proteobacteria	Gammaproteobacteria				Psychromonas arctica
DN10689_c0_g1	4702	4502.8	2261	40.2	DN10689_c0_g1_i2	G151183	G1511833	3	4674	4475	2130.87	38.13	94.83	CDS	627	100	-1	conjugal transfer pilus assembly protein TraE	KO:K12067	Plasmid	Proteobacteria	Gammaproteobacteria				Psychromonas arctica
DN10689_c0_g1	4702	4502.8	2261	40.2	DN10689_c0_g1_i2	G151183	G1511834	4	4674	4475	2130.87	38.13	94.83	CDS	282	100	-1	conjugal transfer pilus assembly protein TraL	KO:K12068	Plasmid	Proteobacteria	Gammaproteobacteria				Proteus mirabilis
DN10689_c0_g1	4702	4502.8	2261	40.2	DN10689_c0_g1_i2	G151183	G1511835	5	4674	4475	2130.87	38.13	94.83	CDS	1107	100	-1	Zn-dependent peptidase ImmA (M78 family)/transcriptional regulator with XRE-family HTH domain	COG2856,COG1396	Plasmid	Proteobacteria	Gammaproteobacteria				Vibrio parahaemolyticus
DN10689_c0_g1	4702	4502.8	2261	40.2	DN10689_c0_g1_i2	G151183	G1511836	6	4674	4475	2130.87	38.13	94.83	CDS	639	100	-1	HP	HPrule	Plasmid	Proteobacteria	Gammaproteobacteria				Vibrio nigripulchritudo
DN10689_c0_g1	4702	4502.8	2261	40.2	DN10689_c0_g1_i2	G151183	G1511837	7	4674	4475	2130.87	38.13	94.83	CDS	636	100	-1	uncharacterized protein DUF4400	pfam14348	Plasmid	Proteobacteria	Gammaproteobacteria				Shewanella decolorationis
DN10689_c0_g1	4702	4502.8	2261	40.2	DN10689_c0_g1_i2	G151183	G1511838	8	4674	4475	2130.87	38.13	94.83	CDS	138	100	-1	HP	HPrule	Plasmid	Proteobacteria	Gammaproteobacteria				Vibrio cholerae
DN94_c0_g1	2544	2345	203	6.9	DN94_c0_g1_i1	G150784	G1507841	1	2544	2345	203	6.93	100	CDS	507	100	1	uncharacterized protein YbjQ (UPF0145 family)	COG0393	Plasmid	Bacteroidetes	Flavobacteriia	Flavobacteriales	Flavobacteriaceae	Aequorivita	Aequorivita viscosa
DN94_c0_g1	2544	2345	203	6.9	DN94_c0_g1_i1	G150784	G1507842	2	2544	2345	203	6.93	100	CDS	1092	82.09	-1	plasmid maintenance system antidote protein VapI/Zn-dependent peptidase ImmA (M78 family)	COG3093,COG2856	Plasmid	Bacteroidetes	Flavobacteriia	Flavobacteriales	Flavobacteriaceae	Aequorivita	Aequorivita viscosa
DN94_c0_g1	2544	2345	203	6.9	DN94_c0_g1_i1	G150784	G1507843	3	2544	2345	203	6.93	100	CDS	333	81.82	-1	proteic killer suppression protein	KO:K07334	Plasmid	Bacteroidetes	Flavobacteriia	Flavobacteriales	Flavobacteriaceae	Aequorivita	Aequorivita viscosa
DN5874_c0_g1	2297	2098	284	10.8	DN5874_c0_g1_i1	G150656	G1506561	1	2297	2098	284	10.84	100	CDS	1284	98.59	-1	O-acetylhomoserine (thiol)-lyase	KO:K01740	Plasmid	Proteobacteria	Alphaproteobacteria				Stappia sp. ARW1T
DN5874_c0_g1	2297	2098	284	10.8	DN5874_c0_g1_i1	G150656	G1506562	2	2297	2098	284	10.84	100	CDS	288	61.29	-1	plasmid maintenance system antidote protein VapI	COG3093	Plasmid	Proteobacteria	Alphaproteobacteria				Rhodopseudomonas palustris
DN5874_c0_g1	2297	2098	284	10.8	DN5874_c0_g1_i1	G150656	G1506563	3	2297	2098	284	10.84	100	CDS	279	67.74	-1	proteic killer suppression protein	KO:K07334	Plasmid	Proteobacteria	Alphaproteobacteria				Devosia sp. DBB001
DN5874_c0_g1	2297	2098	284	10.8	DN5874_c0_g1_i1	G150656	G1506564	4	2297	2098	284	10.84	100	CDS	132	100	-1	HP	KO:K06929	Plasmid	Proteobacteria	Alphaproteobacteria				Stappia sp. ARW1T
DN43934_c0_g1	1705	1506	680	36.2	DN43934_c0_g1_i1	G150070	G1500701	1	1705	1506	680	36.16	100	CDS	231	#N/A	-1	HP	HPrule	Plasmid	Proteobacteria	Gammaproteobacteria				#N/A
DN43934_c0_g1	1705	1506	680	36.2	DN43934_c0_g1_i1	G150070	G1500702	2	1705	1506	680	36.16	100	CDS	921	57.63	-1	plasmid replication initiation protein	COG5527	Plasmid	Proteobacteria	Gammaproteobacteria				Bathymodiolus platifrons methanotrophic gill symbiont
DN40543_c0_g1	1438	1239	81	5.2	DN40543_c0_g1_i1	G149575	G1495751	1	1438	1239	81	5.23	100	CDS	897	63.64	1	HP	HPrule	Plasmid	Proteobacteria	Gammaproteobacteria	Methylococcales	Methylococcaceae	Methylomicrobium	Methylomicrobium album
DN40543_c0_g1	1438	1239	81	5.2	DN40543_c0_g1_i1	G149575	G1495752	2	1438	1239	81	5.23	100	CDS	372	58.7	-1	plasmid stabilization system protein ParE	COG3668	Plasmid	Proteobacteria	Alphaproteobacteria	Rhodobacterales	Rhodobacteraceae	Labrenzia	Labrenzia suaedae
DN40543_c0_g1	1438	1239	81	5.2	DN40543_c0_g1_i1	G149575	G1495753	3	1438	1239	81	5.23	100	CDS	246	69.14	-1	antitoxin ParD1/3/4	KO:K07746	Plasmid	Proteobacteria	Alphaproteobacteria	Rhodospirillales	Acetobacteraceae	Roseomonas	Roseomonas stagni
DN5455_c0_g1	1149	950	32	2.7	DN5455_c0_g1_i1	G148611	G1486111	1	1149	950	32	2.7	100	CDS	738	#N/A	-1	protein involved in plasmid replication-relaxation	pfam13814	Plasmid	#N/A	#N/A	#N/A	#N/A	#N/A	#N/A
DN5455_c0_g1	1149	950	32	2.7	DN5455_c0_g1_i1	G148611	G1486112	2	1149	950	32	2.7	100	CDS	324	#N/A	-1	HP	HPrule	Plasmid	#N/A	#N/A	#N/A	#N/A	#N/A	#N/A
DN6846_c0_g1	1123	924	4110	356.2	DN6846_c0_g1_i1	G148498	G1484981	1	1123	924	4110	356.18	100	CDS	381	#N/A	-1	HP	HPrule	Plasmid	Proteobacteria	Gammaproteobacteria	Enterobacterales	Hafniaceae	Edwardsiella	#N/A
DN6846_c0_g1	1123	924	4110	356.2	DN6846_c0_g1_i1	G148498	G1484982	2	1123	924	4110	356.18	100	CDS	648	81.94	1	plasmid replication DNA-binding protein KfrA	pfam11740	Plasmid	Proteobacteria	Gammaproteobacteria	Enterobacterales	Hafniaceae	Edwardsiella	Edwardsiella tarda
DN3548_c0_g1	1057	858	56	5.2	DN3548_c0_g1_i1	G148163	G1481631	1	1057	858	56	5.23	100	CDS	138	#N/A	1	HP	HPrule	Plasmid	Proteobacteria					#N/A
DN3548_c0_g1	1057	858	56	5.2	DN3548_c0_g1_i1	G148163	G1481632	2	1057	858	56	5.23	100	CDS	336	44.34	-1	plasmid stabilization system protein ParE	COG3668	Plasmid	Proteobacteria					Congregibacter litoralis
DN3548_c0_g1	1057	858	56	5.2	DN3548_c0_g1_i1	G148163	G1481633	3	1057	858	56	5.23	100	CDS	336	44.83	-1	antitoxin ParD1/3/4	KO:K07746	Plasmid	Proteobacteria					Celeribacter marinus
DN10027_c0_g1	974	775	31.6	3.3	DN10027_c0_g1_i1	G147652	G1476521	1	974	775	31.6	3.27	100	CDS	279	80.46	1	proteic killer suppression protein	KO:K07334	Plasmid	Proteobacteria	Gammaproteobacteria				Marinobacter sp.
DN10027_c0_g1	974	775	31.6	3.3	DN10027_c0_g1_i1	G147652	G1476522	2	974	775	31.6	3.27	100	CDS	288	82.11	1	plasmid maintenance system antidote protein VapI	COG3093	Plasmid	Proteobacteria	Gammaproteobacteria				Thioalkalivibrio sulfidiphilus
DN10027_c0_g1	974	775	31.6	3.3	DN10027_c0_g1_i1	G147652	G1476523	3	974	775	31.6	3.27	100	CDS	225	80.82	-1	adenosine kinase	KO:K00856	Plasmid	Proteobacteria	Gammaproteobacteria				Marinicella litoralis
DN38613_c0_g1	970	771	27	2.8	DN38613_c0_g1_i1	G147635	G1476351	1	970	771	27	2.8	100	CDS	213	64.29	1	putative addiction module component	pfam09720	Plasmid						Gracilimonas tropica
DN38613_c0_g1	970	771	27	2.8	DN38613_c0_g1_i1	G147635	G1476352	2	970	771	27	2.8	100	CDS	300	45.92	1	plasmid stabilization system protein ParE	COG3668	Plasmid						Candidatus Tenderia electrophaga
DN37970_c0_g1	905	706	34	3.9	DN37970_c0_g1_i1	G147178	G1471781	1	905	706	34	3.86	100	CDS	447	93.92	1	HP	HPrule	Plasmid	Proteobacteria	Alphaproteobacteria	Rhizobiales	Bradyrhizobiaceae	Afipia	Afipia felis
DN37970_c0_g1	905	706	34	3.9	DN37970_c0_g1_i1	G147178	G1471782	2	905	706	34	3.86	100	CDS	303	93	1	plasmid stabilization system protein ParE	COG3668	Plasmid	Proteobacteria	Alphaproteobacteria	Rhizobiales	Bradyrhizobiaceae	Afipia	Afipia felis
DN37970_c0_g1	905	706	34	3.9	DN37970_c0_g1_i1	G147178	G1471783	3	905	706	34	3.86	100	CDS	102	#N/A	-1	HP	HPrule	Plasmid	Proteobacteria	Alphaproteobacteria	Rhizobiales	Bradyrhizobiaceae	Afipia	#N/A
DN2040_c0_g1	896	697	29	3.3	DN2040_c0_g1_i1	G147097	G1470971	1	896	697	29	3.33	100	CDS	258	80	1	proteic killer suppression protein	KO:K07334	Plasmid	Proteobacteria	Gammaproteobacteria				Marinobacter sp.
DN2040_c0_g1	896	697	29	3.3	DN2040_c0_g1_i1	G147097	G1470972	2	896	697	29	3.33	100	CDS	318	77.32	1	plasmid maintenance system antidote protein VapI	COG3093	Plasmid	Proteobacteria	Gammaproteobacteria				Halospina denitrificans
DN2040_c0_g1	896	697	29	3.3	DN2040_c0_g1_i1	G147097	G1470973	3	896	697	29	3.33	100	CDS	180	#N/A	1	HP	HPrule	Plasmid	Proteobacteria	Gammaproteobacteria				#N/A
DN24656_c0_g1	842	643	21	2.6	DN24656_c0_g1_i1	G146617	G1466171	1	842	643	21	2.62	100	CDS	285	93.62	1	catechol 2,3-dioxygenase-like lactoylglutathione lyase family enzyme	COG0346	Plasmid	Proteobacteria	Alphaproteobacteria	Rhizobiales	Bradyrhizobiaceae		Oceanibaculum indicum
DN24656_c0_g1	842	643	21	2.6	DN24656_c0_g1_i1	G146617	G1466172	2	842	643	21	2.62	100	CDS	231	82.89	1	plasmid stability protein	COG4691	Plasmid	Proteobacteria	Alphaproteobacteria	Rhizobiales	Bradyrhizobiaceae		Rhodopseudomonas pentothenatexigens
DN24656_c0_g1	842	643	21	2.6	DN24656_c0_g1_i1	G146617	G1466173	3	842	643	21	2.62	100	CDS	276	80.22	1	predicted nucleic acid-binding protein	COG4113	Plasmid	Proteobacteria	Alphaproteobacteria	Rhizobiales	Bradyrhizobiaceae		Bradyrhizobium erythrophlei
DN3536_c0_g1	809	610	20	2.6	DN3536_c0_g1_i1	G146270	G1462701	1	809	610	20	2.63	100	CDS	378	73.49	1	plasmid stabilization system protein ParE	COG3668	Plasmid	Planctomycetes	Planctomycetia	Candidatus Brocadiales	Candidatus Brocadiaceae	Candidatus Jettenia	Candidatus Jettenia caeni
DN3536_c0_g1	809	610	20	2.6	DN3536_c0_g1_i1	G146270	G1462702	2	809	610	20	2.63	100	CDS	237	#N/A	1	HP	HPrule	Plasmid	Planctomycetes	Planctomycetia	Candidatus Brocadiales	Candidatus Brocadiaceae	Candidatus Jettenia	#N/A
DN3536_c0_g1	809	610	20	2.6	DN3536_c0_g1_i1	G146270	G1462703	3	809	610	20	2.63	100	CDS	78	#N/A	-1	HP	HPrule	Plasmid	Planctomycetes	Planctomycetia	Candidatus Brocadiales	Candidatus Brocadiaceae	Candidatus Jettenia	#N/A
DN11257_c0_g1	796	597.3	4017	538.5	DN11257_c0_g1_i2	G150411	G1504112	2	1987	1788	1884.57	84.4	15.67	CDS	1002	87.31	1	plasmid segregation protein ParM	KO:K18640	Plasmid	Proteobacteria	Gammaproteobacteria	Thiotrichales	Piscirickettsiaceae	Methylophaga	Methylophaga aminisulfidivorans
DN11257_c0_g1	796	597.3	4017	538.5	DN11257_c0_g1_i2	G150411	G1504113	3	1987	1788	1884.57	84.4	15.67	CDS	258	65.91	1	HP	HPrule	Plasmid	Proteobacteria	Gammaproteobacteria	Thiotrichales	Piscirickettsiaceae	Methylophaga	Methylophaga aminisulfidivorans
DN9798_c0_g1	708	509	31	4.9	DN9798_c0_g1_i1	G145003	G1450031	1	708	509	31	4.88	100	CDS	180	#N/A	-1	plasmid stabilization system protein ParE	COG3668	Plasmid	Proteobacteria	Gammaproteobacteria				#N/A
DN9798_c0_g1	708	509	31	4.9	DN9798_c0_g1_i1	G145003	G1450032	2	708	509	31	4.88	100	CDS	264	51.25	-1	PHD/YefM family antitoxin component YafN of YafNO toxin-antitoxin module	COG2161	Plasmid	Proteobacteria	Gammaproteobacteria				Idiomarina maritima
DN9798_c0_g1	708	509	31	4.9	DN9798_c0_g1_i1	G145003	G1450033	3	708	509	31	4.88	100	CDS	153	66	-1	primosomal protein N' (replication factor Y)	KO:K04066	Plasmid	Proteobacteria	Gammaproteobacteria				Marinicella litoralis
DN4139_c0_g1	687	488	18	3	DN4139_c0_g1_i1	G144666	G1446661		687	488	18	2.95	100	CDS	687	44.86	1	plasmid replication initiation protein	COG5527	Plasmid	Proteobacteria	Gammaproteobacteria	Pseudomonadales	Pseudomonadaceae	Pseudomonas	Pseudomonas putida
DN11707_c0_g1	598	399	20	4	DN11707_c0_g1_i1	G142855	G1428551	1	598	399	20	4.01	100	CDS	324	88.66	-1	plasmid stabilization system protein ParE	COG3668	Plasmid	Proteobacteria	Alphaproteobacteria	Rhodobacterales	Rhodobacteraceae		Aliiroseovarius crassostreae
DN11707_c0_g1	598	399	20	4	DN11707_c0_g1_i1	G142855	G1428552	2	598	399	20	4.01	100	CDS	255	96.43	-1	Arc/MetJ-type ribon-helix-helix transcriptional regulator	COG3609	Plasmid	Proteobacteria	Alphaproteobacteria	Rhodobacterales	Rhodobacteraceae		Loktanella fryxellensis
DN3197_c0_g1	559	360	12	2.7	DN3197_c0_g1_i1	G141772	G1417721		559	360	12	2.67	100	CDS	297	60	-1	plasmid maintenance system antidote protein VapI	COG3093	Plasmid	Cyanobacteria	unclassified Cyanobacteria	Synechococcales	Synechococcaceae	Synechococcus	Synechococcus sp. PCC 7336
DN26881_c0_g1	542	343	19	4.4	DN26881_c0_g1_i1	G141271	G1412711		542	343	19	4.44	100	CDS	411	88.33	-1	plasmid replication initiation protein	COG5534	Plasmid	Proteobacteria	Alphaproteobacteria	Rhodobacterales	Rhodobacteraceae	Pseudooceanicola	Pseudooceanicola nanhaiensis
DN383_c0_g1	536	337	18	4.3	DN383_c0_g1_i1	G141077	G1410771	1	536	337	18	4.28	100	CDS	318	93.81	1	proteic killer suppression protein	KO:K07334	Plasmid	Proteobacteria	Gammaproteobacteria				Halomonas meridiana
DN383_c0_g1	536	337	18	4.3	DN383_c0_g1_i1	G141077	G1410772	2	536	337	18	4.28	100	CDS	201	93.94	1	plasmid maintenance system antidote protein VapI	COG3093	Plasmid	Proteobacteria	Gammaproteobacteria				Marinobacter persicus
DN14258_c0_g1	529	330	18	4.4	DN14258_c0_g1_i1	G140871	G1408711	1	529	330	18	4.37	100	CDS	285	76.4	-1	plasmid stabilization system protein ParE	COG3668	Plasmid	Bacteroidetes	Bacteroidia	Marinilabiliales	Prolixibacteraceae	Sunxiuqinia	Sunxiuqinia dokdonensis
DN14258_c0_g1	529	330	18	4.4	DN14258_c0_g1_i1	G140871	G1408712	2	529	330	18	4.37	100	CDS	177	50	-1	HP	HPrule	Plasmid	Bacteroidetes	Bacteroidia	Marinilabiliales	Prolixibacteraceae	Sunxiuqinia	Sunxiuqinia dokdonensis
DN18505_c0_g1	529	330	12	2.9	DN18505_c0_g1_i1	G140874	G1408741	1	529	330	12	2.91	100	CDS	225	51.35	-1	plasmid stabilization system protein ParE	COG3668	Plasmid	Bacteroidetes	Cytophagia	Cytophagales			Roseivirga ehrenbergii
DN18505_c0_g1	529	330	12	2.9	DN18505_c0_g1_i1	G140874	G1408742	2	529	330	12	2.91	100	CDS	210	63.77	-1	HP	HPrule	Plasmid	Bacteroidetes	Cytophagia	Cytophagales			Cyclobacterium qasimii
DN19222_c0_g1	517	318	15	3.8	DN19222_c0_g1_i1	G140452	G1404521	1	517	318	15	3.78	100	CDS	237	87.34	-1	plasmid maintenance system antidote protein VapI	COG3093	Plasmid	Proteobacteria					Nitrincola sp. A-D6
DN19222_c0_g1	517	318	15	3.8	DN19222_c0_g1_i1	G140452	G1404522	2	517	318	15	3.78	100	CDS	261	84.71	-1	proteic killer suppression protein	KO:K07334	Plasmid	Proteobacteria					Desulfonatronovibrio hydrogenovorans
DN44111_c0_g1	501	302	15	4	DN44111_c0_g1_i1	G139837	G1398371		501	302	15	3.98	100	CDS	498	32.93	1	plasmid recombination enzyme	pfam01076	Plasmid	Proteobacteria	Gammaproteobacteria	Enterobacterales	Enterobacteriaceae	Escherichia	Escherichia coli
DN88_c0_g1	501	302	40	10.6	DN88_c0_g1_i1	G139846	G1398461	1	501	302	40	10.61	100	CDS	237	47.44	-1	predicted nucleic acid-binding protein	COG4113	Plasmid	Proteobacteria	Alphaproteobacteria	Rhodospirillales			unclassified Rhodopila
DN88_c0_g1	501	302	40	10.6	DN88_c0_g1_i1	G139846	G1398462	2	501	302	40	10.61	100	CDS	234	44.16	-1	plasmid stability protein	COG4691	Plasmid	Proteobacteria	Alphaproteobacteria	Rhodospirillales			Niveispirillum irakense
DN2525_c0_g1	475	276.5	12	3.5	DN2525_c0_g1_i1	G141482	G1414821	1	549	350	7.74	1.77	50.97	CDS	189	79.03	1	HP	HPrule	Plasmid	Proteobacteria	Gammaproteobacteria				Thioalkalivibrio paradoxus
DN2525_c0_g1	475	276.5	12	3.5	DN2525_c0_g1_i1	G141482	G1414822	2	549	350	7.74	1.77	50.97	CDS	207	68.66	1	plasmid stabilization system protein ParE	COG3668	Plasmid	Proteobacteria	Gammaproteobacteria				Marinomonas rhizomae
DN20057_c0_g1	452	253	16	5.1	DN20057_c0_g1_i1	G137529	G1375291		452	253	16	5.06	100	CDS	405	99.26	1	plasmid replication initiation protein	COG5534	Plasmid	Proteobacteria	Alphaproteobacteria	Rhodobacterales	Rhodobacteraceae	Phaeobacter	Phaeobacter sp. S60
DN39_c0_g1	452	253	20	6.3	DN39_c0_g1_i1	G137548	G1375481	1	452	253	20	6.33	100	CDS	111	#N/A	1	HP	HPrule	Plasmid	Proteobacteria	Gammaproteobacteria	Thiotrichales	Piscirickettsiaceae	Methylophaga	#N/A
DN39_c0_g1	452	253	20	6.3	DN39_c0_g1_i1	G137548	G1375482	2	452	253	20	6.33	100	CDS	285	80	1	plasmid maintenance system antidote protein VapI	COG3093	Plasmid	Proteobacteria	Gammaproteobacteria	Thiotrichales	Piscirickettsiaceae	Methylophaga	Methylophaga lonarensis
DN32710_c0_g1	437	238	7	2.4	DN32710_c0_g1_i1	G136726	G1367261	1	437	238	7	2.36	100	CDS	225	#N/A	1	plasmid stabilization system protein ParE	COG3668	Plasmid	Proteobacteria	Gammaproteobacteria	Oceanospirillales	Oceanospirillaceae	Nitrincola	#N/A
DN32710_c0_g1	437	238	7	2.4	DN32710_c0_g1_i1	G136726	G1367262	2	437	238	7	2.36	100	CDS	132	79.07	-1	plasmid maintenance system antidote protein VapI	COG3093	Plasmid	Proteobacteria	Gammaproteobacteria	Oceanospirillales	Oceanospirillaceae	Nitrincola	Nitrincola sp. A-D6
DN13448_c0_g1	431	232	15	5.2	DN13448_c0_g1_i1	G136314	G1363141	1	431	232	15	5.18	100	CDS	162	98.15	-1	plasmid stabilization system protein ParE	COG3668	Plasmid	Proteobacteria	Alphaproteobacteria	Rhodobacterales	Rhodobacteraceae	Roseovarius	Roseovarius litoreus
DN13448_c0_g1	431	232	15	5.2	DN13448_c0_g1_i1	G136314	G1363142	2	431	232	15	5.18	100	CDS	267	97.73	-1	Arc/MetJ-type ribon-helix-helix transcriptional regulator	COG3609	Plasmid	Proteobacteria	Alphaproteobacteria	Rhodobacterales	Rhodobacteraceae	Roseobacter	Roseobacter sp. MED193
DN1568_c0_g1	430	231	36	12.5	DN1568_c0_g1_i1	G136250	G1362501		430	231	36	12.48	100	CDS	414	74.26	-1	plasmid replication DNA-binding protein KfrA	pfam11740	Plasmid	Proteobacteria	Gammaproteobacteria	Alteromonadales	Alteromonadaceae	Marinobacter	Marinobacter hydrocarbonoclasticus
DN39014_c0_g1	424	225	8	2.9	DN39014_c0_g1_i1	G135894	G1358941	1	424	225	8	2.85	100	CDS	267	89.53	1	HP	KO:K09790	Plasmid	Proteobacteria	Alphaproteobacteria				Oceanibaculum indicum
DN39014_c0_g1	424	225	8	2.9	DN39014_c0_g1_i1	G135894	G1358942	2	424	225	8	2.85	100	CDS	159	80.77	-1	plasmid maintenance system antidote protein VapI	COG3093	Plasmid	Proteobacteria	Alphaproteobacteria				Rhizobium sp. 2MFCol3.1
DN13295_c0_g1	418	219	16	5.9	DN13295_c0_g1_i1	G135455	G1354551	1	418	219	16	5.85	100	CDS	120	90	-1	plasmid maintenance system antidote protein VapI	COG3093	Plasmid	Proteobacteria	Alphaproteobacteria	Rhodospirillales	Rhodospirillaceae	Oceanibaculum	Oceanibaculum indicum
DN13295_c0_g1	418	219	16	5.9	DN13295_c0_g1_i1	G135455	G1354552	2	418	219	16	5.85	100	CDS	267	87.36	-1	proteic killer suppression protein	KO:K07334	Plasmid	Proteobacteria	Alphaproteobacteria	Rhodospirillales	Rhodospirillaceae	Oceanibaculum	Oceanibaculum indicum
DN9577_c0_g1	397	198	13	5.3	DN9577_c0_g1_i1	G134042	G1340421	1	397	198	13	5.26	100	CDS	177	68.97	1	HP	HPrule	Plasmid						Candidatus Jettenia caeni
DN9577_c0_g1	397	198	13	5.3	DN9577_c0_g1_i1	G134042	G1340422	2	397	198	13	5.26	100	CDS	231	76.62	1	plasmid stabilization system protein ParE	COG3668	Plasmid						Methylohalobius crimeensis
DN46869_c0_g1	389	190	10	4.2	DN46869_c0_g1_i1	G133426	G1334261	1	389	190	10	4.21	100	CDS	132	67.44	1	plasmid maintenance system antidote protein VapI	COG3093	Plasmid	Proteobacteria					Marinobacter sp. EN3
DN46869_c0_g1	389	190	10	4.2	DN46869_c0_g1_i1	G133426	G1334262	2	389	190	10	4.21	100	CDS	123	100	1	HP	HPrule	Plasmid	Proteobacteria					Oceanibaculum indicum
DN957_c0_g1	387	188.4	10	4.3	DN957_c0_g1_i1	G126422	G1264221	1	321	122	3.49	2.29	53.88	CDS	249	80.49	1	plasmid maintenance system antidote protein VapI	COG3093	Plasmid	Proteobacteria	Gammaproteobacteria				Marinobacter daqiaonensis
DN957_c0_g1	387	188.4	10	4.3	DN957_c0_g1_i2	G138266	G1382661	1	465	266	6.51	1.96	46.12	CDS	96	79.31	1	proteic killer suppression protein	KO:K07334	Plasmid	Proteobacteria	Gammaproteobacteria				Halomonas sp. PBN3
DN18729_c0_g1	363	164	4	2	DN18729_c0_g1_i1	G131071	G1310711	1	363	164	4	1.95	100	CDS	138	82.61	-1	plasmid stabilization system protein ParE	COG3668	Plasmid	Proteobacteria	Alphaproteobacteria	Rhodobacterales	Rhodobacteraceae		Oceanicola sp. MCTG156(1a)
DN18729_c0_g1	363	164	4	2	DN18729_c0_g1_i1	G131071	G1310712	2	363	164	4	1.95	100	CDS	225	87.84	-1	antitoxin ParD1/3/4	KO:K07746	Plasmid	Proteobacteria	Alphaproteobacteria	Rhodobacterales	Rhodobacteraceae		Roseovarius sp. 217
DN32148_c0_g1	340	141	9	5.1	DN32148_c0_g1_i1	G128781	G1287811		340	141	9	5.11	100	CDS	324	72.82	1	putative component of toxin-antitoxin plasmid stabilization module	COG3657	Plasmid	Proteobacteria	Gammaproteobacteria	Cellvibrionales	Spongiibacteraceae	Oceanicoccus	Oceanicoccus sagamiensis
DN30259_c0_g1	314	115	5	3.5	DN30259_c0_g1_i1	G125456	G1254561		314	115	5	3.48	100	CDS	240	98.75	-1	plasmid maintenance system antidote protein VapI	COG3093	Plasmid	Proteobacteria	Gammaproteobacteria	Chromatiales	Chromatiaceae	Nitrosococcus	Nitrosococcus watsonii
DN48963_c0_g1	311	112	6	4.3	DN48963_c0_g1_i1	G125100	G1251001		311	112	6	4.29	100	CDS	309	34.02	1	plasmid replication initiation protein	COG5527	Plasmid	Proteobacteria	Gammaproteobacteria	Alteromonadales	Alteromonadaceae	Alteromonas	Alteromonas macleodii
DN993_c0_g1	308	109	2	1.5	DN993_c0_g1_i1	G124662	G1246621		308	109	2	1.47	100	CDS	222	93.06	1	plasmid stabilization system protein ParE	COG3668	Plasmid	Proteobacteria	Gammaproteobacteria	Thiotrichales	Piscirickettsiaceae	Methylophaga	Methylophaga nitratireducenticrescens
DN36155_c0_g1	301	102	7	5.5	DN36155_c0_g1_i1	G123574	G1235741		301	102	7	5.5	100	CDS	300	100	1	plasmid segregation protein ParM	KO:K18640	Plasmid	Proteobacteria	Gammaproteobacteria	Vibrionales	Vibrionaceae	Vibrio	Vibrio alginolyticus
DN42213_c0_g1	291	92.1	7	6.1	DN42213_c0_g1_i1	G121902	G1219021		291	92.11	7	6.09	100	CDS	207	62.5	1	plasmid maintenance system antidote protein VapI	COG3093	Plasmid	Proteobacteria	Betaproteobacteria	Nitrosomonadales	Nitrosomonadaceae	Nitrosomonas	Nitrosomonas marina
DN37605_c0_g1	256	60.4	3	4	DN37605_c0_g1_i1	G114924	G1149241		256	60.35	3	3.98	100	CDS	255	87.06	1	putative component of toxin-antitoxin plasmid stabilization module	COG3657	Plasmid	Proteobacteria	Gammaproteobacteria	Chromatiales	Ectothiorhodospiraceae	Ectothiorhodosinus	Ectothiorhodosinus mongolicus
DN31606_c0_g1	255	59.5	4	5.4	DN31606_c0_g1_i1	G114673	G1146731		255	59.52	4	5.38	100	CDS	153	86.27	1	plasmid maintenance system antidote protein VapI	COG3093	Plasmid	Proteobacteria	Gammaproteobacteria	Oceanospirillales	Oceanospirillaceae	Marinomonas	Marinomonas sp. GOBB3-320
DN49764_c0_g1	251	56.3	4	5.7	DN49764_c0_g1_i1	G113883	G1138831	1	251	56.26	4	5.69	100	CDS	135	97.73	1	putative component of toxin-antitoxin plasmid stabilization module	COG3657	Plasmid	Proteobacteria	Alphaproteobacteria	Rhodobacterales	Rhodobacteraceae		Antarctobacter heliothermus
DN49764_c0_g1	251	56.3	4	5.7	DN49764_c0_g1_i1	G113883	G1138832	2	251	56.26	4	5.69	100	CDS	114	100	1	HP	HPrule	Plasmid	Proteobacteria	Alphaproteobacteria	Rhodobacterales	Rhodobacteraceae		Planktotalea frisia
DN29961_c0_g1	247	53.1	3	4.5	DN29961_c0_g1_i1	G112758	G1127581	1	247	53.07	3	4.53	100	CDS	135	93.33	-1	HP	HPrule	Plasmid	Proteobacteria	Gammaproteobacteria	Thiotrichales	Piscirickettsiaceae	Methylophaga	Methylophaga aminisulfidivorans
DN29961_c0_g1	247	53.1	3	4.5	DN29961_c0_g1_i1	G112758	G1127582	2	247	53.07	3	4.53	100	CDS	111	80.56	-1	plasmid segregation protein ParM	KO:K18640	Plasmid	Proteobacteria	Gammaproteobacteria	Thiotrichales	Piscirickettsiaceae	Methylophaga	Methylophaga aminisulfidivorans
DN45773_c0_g1	240	47.7	3	5	DN45773_c0_g1_i1	G110936	G1109361		240	47.71	3	5.04	100	CDS	240	50.85	1	plasmid stabilization system protein ParE	COG3668	Plasmid	Proteobacteria	Gammaproteobacteria	Oceanospirillales	Oleiphilaceae	Oleiphilus	Oleiphilus sp. HI0125
DN17290_c0_g1	213	29.6	3	8.1	DN17290_c0_g1_i1	G103415	G1034151		213	29.64	3	8.11	100	CDS	210	83.33	-1	plasmid maintenance system antidote protein VapI	COG3093	Plasmid	Cyanobacteria	unclassified Cyanobacteria	Nostocales	Scytonemataceae	Scytonema	Scytonema millei
DN14406_c0_g1	210	27.9	6	17.2	DN14406_c0_g1_i1	G102555	G1025551		210	27.9	6	17.22	100	CDS	210	70	-1	plasmid recombination enzyme	pfam01076	Plasmid	Proteobacteria	Betaproteobacteria	Neisseriales	Chromobacteriaceae	Gulbenkiania	Gulbenkiania indica
DN34024_c0_g1	206	25.7	3	9.4	DN34024_c0_g1_i1	G101523	G1015231		206	25.67	3	9.36	100	CDS	204	71.64	1	plasmid maintenance system antidote protein VapI	COG3093	Plasmid	Bacteroidetes	Flavobacteriia	Flavobacteriales	Flavobacteriaceae	Formosa	Formosa sp. Hel1_33_131
DN14890_c0_g1	204	24.6	2	6.5	DN14890_c0_g1_i1	G100869	G1008691		204	24.6	2	6.51	100	CDS	204	98.53	1	putative component of toxin-antitoxin plasmid stabilization module	COG3657	Plasmid	Proteobacteria	Alphaproteobacteria	Rhodobacterales	Rhodobacteraceae	Antarctobacter	Antarctobacter heliothermus
DN2148_c0_g1	10771	10572	192917	1461.2	DN2148_c0_g1_i1	G151322	G1513221	1	10771	10572	192917	1461.22	100	CDS	279	100	-1	HP	HPrule	Phix174microvirus				Microviridae		Enterobacteria phage phiX174 sensu lato
DN2148_c0_g1	10771	10572	192917	1461.2	DN2148_c0_g1_i1	G151322	G1513222	2	10771	10572	192917	1461.22	100	CDS	261	100	-1	phage protein C	pfam12025	Phix174microvirus				Microviridae		Enterobacteria phage phiX174 sensu lato
DN2148_c0_g1	10771	10572	192917	1461.2	DN2148_c0_g1_i1	G151322	G1513223	3	10771	10572	192917	1461.22	100	CDS	1542	100	-1	bacteriophage replication gene A protein	pfam05840	Phix174microvirus				Microviridae		Escherichia coli
DN2148_c0_g1	10771	10572	192917	1461.2	DN2148_c0_g1_i1	G151322	G1513224	4	10771	10572	192917	1461.22	100	CDS	987	100	-1	pilot protein H	pfam04687	Phix174microvirus				Microviridae		Escherichia coli
DN2148_c0_g1	10771	10572	192917	1461.2	DN2148_c0_g1_i1	G151322	G1513225	5	10771	10572	192917	1461.22	100	CDS	528	100	-1	major spike protein (G protein)	pfam02306	Phix174microvirus				Microviridae		Escherichia coli
DN2148_c0_g1	10771	10572	192917	1461.2	DN2148_c0_g1_i1	G151322	G1513226	6	10771	10572	192917	1461.22	100	CDS	1284	100	-1	capsid protein (F protein)/capsid protein (F protein)	pfam02305,pfam02305	Phix174microvirus				Microviridae		Enterobacteria phage phiX174 sensu lato
DN2148_c0_g1	10771	10572	192917	1461.2	DN2148_c0_g1_i1	G151322	G1513227	7	10771	10572	192917	1461.22	100	CDS	117	100	-1	viral J protein	pfam04726	Phix174microvirus				Microviridae		Leptospira interrogans
DN2148_c0_g1	10771	10572	192917	1461.2	DN2148_c0_g1_i1	G151322	G1513228	8	10771	10572	192917	1461.22	100	CDS	459	100	-1	bacteriophage scaffolding protein D	pfam02925	Phix174microvirus				Microviridae		Enterobacteria phage phiX174 sensu lato
DN2148_c0_g1	10771	10572	192917	1461.2	DN2148_c0_g1_i1	G151322	G1513229	9	10771	10572	192917	1461.22	100	CDS	261	100	-1	phage protein C	pfam12025	Phix174microvirus				Microviridae		Enterobacteria phage phiX174 sensu lato
DN2148_c0_g1	10771	10572	192917	1461.2	DN2148_c0_g1_i1	G151322	G15132210	10	10771	10572	192917	1461.22	100	CDS	1542	100	-1	bacteriophage replication gene A protein	pfam05840	Phix174microvirus				Microviridae		Escherichia coli
DN2148_c0_g1	10771	10572	192917	1461.2	DN2148_c0_g1_i1	G151322	G15132211	11	10771	10572	192917	1461.22	100	CDS	987	100	-1	pilot protein H	pfam04687	Phix174microvirus				Microviridae		Escherichia coli
DN2148_c0_g1	10771	10572	192917	1461.2	DN2148_c0_g1_i1	G151322	G15132212	12	10771	10572	192917	1461.22	100	CDS	528	100	-1	major spike protein (G protein)	pfam02306	Phix174microvirus				Microviridae		Escherichia coli
DN2148_c0_g1	10771	10572	192917	1461.2	DN2148_c0_g1_i1	G151322	G15132213	13	10771	10572	192917	1461.22	100	CDS	1284	100	-1	capsid protein (F protein)/capsid protein (F protein)	pfam02305,pfam02305	Phix174microvirus				Microviridae		Enterobacteria phage phiX174 sensu lato
DN2148_c0_g1	10771	10572	192917	1461.2	DN2148_c0_g1_i1	G151322	G15132214	14	10771	10572	192917	1461.22	100	CDS	117	100	-1	viral J protein	pfam04726	Phix174microvirus				Microviridae		Leptospira interrogans
DN2148_c0_g1	10771	10572	192917	1461.2	DN2148_c0_g1_i1	G151322	G15132215	15	10771	10572	192917	1461.22	100	CDS	177	100	-1	HP	HPrule	Phix174microvirus	ssDNA viruses	unclassified ssDNA viruses	unclassified ssDNA viruses	Microviridae	Phix174microvirus	Enterobacteria phage phiX174 sensu lato
DN11404_c0_g1	3849	3650.3	4207	92.3	DN11404_c0_g1_i2	G151233	G1512331	1	5596	5397	3963.06	58.8	63.71	CDS	492	40.79	-1	HP	HPrule	Virus	Proteobacteria					Pandoraea norimbergensis
DN11404_c0_g1	3849	3650.3	4207	92.3	DN11404_c0_g1_i2	G151233	G1512332	2	5596	5397	3963.06	58.8	63.71	CDS	885	36.32	1	HP	HPrule	Virus	Proteobacteria					Cupriavidus sp. HMR-1
DN11404_c0_g1	3849	3650.3	4207	92.3	DN11404_c0_g1_i2	G151233	G1512334	4	5596	5397	3963.06	58.8	63.71	CDS	216	#N/A	1	virion coat protein B	pfam10389	Virus	Proteobacteria					#N/A
DN11404_c0_g1	3849	3650.3	4207	92.3	DN11404_c0_g1_i2	G151233	G1512336	6	5596	5397	3963.06	58.8	63.71	CDS	1149	28.67	1	HP	HPrule	Virus	Proteobacteria					Thiobacillus denitrificans
DN11404_c0_g1	3849	3650.3	4207	92.3	DN11404_c0_g1_i2	G151233	G1512337	7	5596	5397	3963.06	58.8	63.71	CDS	276	35.56	1	uncharacterized protein DUF2523	pfam10734	Virus	Proteobacteria					Methylobacter tundripaludum
DN11404_c0_g1	3849	3650.3	4207	92.3	DN11404_c0_g1_i2	G151233	G1512338	8	5596	5397	3963.06	58.8	63.71	CDS	1050	49.04	1	zona occludens toxin	KO:K10954	Virus	Proteobacteria					Methylovulum psychrotolerans
DN11138_c0_g1	1358	1158.9	45315	3131.2	DN11138_c0_g1_i3	G149260	G1492601	1	1331	1132	43196.9	3055.69	97.59	CDS	453	39.86	1	phage replication initiation protein	KO:K07467	Virus						Acinetobacter baumannii
DN11138_c0_g1	1358	1158.9	45315	3131.2	DN11138_c0_g1_i3	G149260	G1492604	4	1331	1132	43196.9	3055.69	97.59	CDS	129	#N/A	1	virion coat protein B	pfam10389	Virus						#N/A
DN11607_c0_g1	6943	6744	2458	29.2	DN11607_c0_g1_i1	G151284	G1512841	1	6943	6744	2458	29.19	100	CDS	2373	32.09	-1	HP	HPrule	Viruses	dsRNA viruses	unclassified dsRNA viruses	unclassified dsRNA viruses	Cystoviridae	Cystovirus	Pseudomonas virus phi6
DN11607_c0_g1	6943	6744	2458	29.2	DN11607_c0_g1_i1	G151284	G1512842	2	6943	6744	2458	29.19	100	CDS	357	#N/A	-1	HP	HPrule	Viruses	dsRNA viruses	unclassified dsRNA viruses	unclassified dsRNA viruses	Cystoviridae	Cystovirus	#N/A
DN11607_c0_g1	6943	6744	2458	29.2	DN11607_c0_g1_i1	G151284	G1512843	3	6943	6744	2458	29.19	100	CDS	1008	#N/A	-1	ATPase P4-like protein	pfam11602	Viruses	dsRNA viruses	unclassified dsRNA viruses	unclassified dsRNA viruses	Cystoviridae	Cystovirus	#N/A
DN11607_c0_g1	6943	6744	2458	29.2	DN11607_c0_g1_i1	G151284	G1512844	4	6943	6744	2458	29.19	100	CDS	1983	45.15	-1	RNA dependent RNA polymerase	pfam00680	Viruses	dsRNA viruses	unclassified dsRNA viruses	unclassified dsRNA viruses	Cystoviridae	Cystovirus	Pseudomonas virus phi6
DN11607_c0_g1	6943	6744	2458	29.2	DN11607_c0_g1_i1	G151284	G1512845	5	6943	6744	2458	29.19	100	CDS	486	#N/A	-1	HP	HPrule	Viruses	dsRNA viruses	unclassified dsRNA viruses	unclassified dsRNA viruses	Cystoviridae	Cystovirus	#N/A
DN11607_c0_g1	6943	6744	2458	29.2	DN11607_c0_g1_i1	G151284	G1512846	6	6943	6744	2458	29.19	100	CDS	468	#N/A	-1	HP	HPrule	Viruses	dsRNA viruses	unclassified dsRNA viruses	unclassified dsRNA viruses	Cystoviridae	Cystovirus	#N/A
DN10904_c0_g1	6884	6685	2525025	30245.9	DN10904_c0_g1_i1	G151283	G1512831	1	6884	6685	2525025	30245.9	100	CDS	489	#N/A	1	HP	HPrule	Viruses	dsRNA viruses	unclassified dsRNA viruses	unclassified dsRNA viruses	Cystoviridae	Cystovirus	#N/A
DN10904_c0_g1	6884	6685	2525025	30245.9	DN10904_c0_g1_i1	G151283	G1512832	2	6884	6685	2525025	30245.9	100	CDS	1986	45.77	1	RNA dependent RNA polymerase	pfam00680	Viruses	dsRNA viruses	unclassified dsRNA viruses	unclassified dsRNA viruses	Cystoviridae	Cystovirus	Pseudomonas virus phi6
DN10904_c0_g1	6884	6685	2525025	30245.9	DN10904_c0_g1_i1	G151283	G1512833	3	6884	6685	2525025	30245.9	100	CDS	993	#N/A	1	ATPase P4-like protein	pfam11602	Viruses	dsRNA viruses	unclassified dsRNA viruses	unclassified dsRNA viruses	Cystoviridae	Cystovirus	#N/A
DN10904_c0_g1	6884	6685	2525025	30245.9	DN10904_c0_g1_i1	G151283	G1512834	4	6884	6685	2525025	30245.9	100	CDS	348	#N/A	1	HP	HPrule	Viruses	dsRNA viruses	unclassified dsRNA viruses	unclassified dsRNA viruses	Cystoviridae	Cystovirus	#N/A
DN10904_c0_g1	6884	6685	2525025	30245.9	DN10904_c0_g1_i1	G151283	G1512835	5	6884	6685	2525025	30245.9	100	CDS	2403	31.54	1	HP	HPrule	Viruses	dsRNA viruses	unclassified dsRNA viruses	unclassified dsRNA viruses	Cystoviridae	Cystovirus	Pseudomonas virus phi6
DN10904_c0_g1	6884	6685	2525025	30245.9	DN10904_c0_g1_i1	G151283	G1512836	6	6884	6685	2525025	30245.9	100	CDS	156	#N/A	1	HP	HPrule	Viruses	dsRNA viruses	unclassified dsRNA viruses	unclassified dsRNA viruses	Cystoviridae	Cystovirus	#N/A
DN10904_c0_g1	6884	6685	2525025	30245.9	DN10904_c0_g1_i1	G151283	G1512837	7	6884	6685	2525025	30245.9	100	CDS	114	#N/A	1	HP	HPrule	Viruses	dsRNA viruses	unclassified dsRNA viruses	unclassified dsRNA viruses	Cystoviridae	Cystovirus	#N/A
DN11544_c0_g1	3478	3279	47274.8	1154.5	DN11544_c0_g1_i1	G151060	G1510601	1	3478	3279	47274.8	1154.49	100	CDS	1842	#N/A	-1	HP	HPrule	Viruses	dsRNA viruses	unclassified dsRNA viruses	unclassified dsRNA viruses	Cystoviridae	Cystovirus	#N/A
DN11544_c0_g1	3478	3279	47274.8	1154.5	DN11544_c0_g1_i1	G151060	G1510602	2	3478	3279	47274.8	1154.49	100	CDS	537	47.83	-1	HP	HPrule	Viruses	dsRNA viruses	unclassified dsRNA viruses	unclassified dsRNA viruses	Cystoviridae	Cystovirus	Pseudomonas virus phi6
DN11544_c0_g1	3478	3279	47274.8	1154.5	DN11544_c0_g1_i1	G151060	G1510603	3	3478	3279	47274.8	1154.49	100	CDS	288	#N/A	-1	HP	HPrule	Viruses	dsRNA viruses	unclassified dsRNA viruses	unclassified dsRNA viruses	Cystoviridae	Cystovirus	#N/A
DN11544_c0_g1	3478	3279	47274.8	1154.5	DN11544_c0_g1_i1	G151060	G1510604	4	3478	3279	47274.8	1154.49	100	CDS	165	#N/A	-1	HP	HPrule	Viruses	dsRNA viruses	unclassified dsRNA viruses	unclassified dsRNA viruses	Cystoviridae	Cystovirus	#N/A
DN10988_c0_g1	3147	2948	2318	63	DN10988_c0_g1_i1	G150999	G1509991	1	3147	2948	2318	62.96	100	CDS	1842	#N/A	-1	HP	HPrule	Viruses	dsRNA viruses	unclassified dsRNA viruses	unclassified dsRNA viruses	Cystoviridae	Cystovirus	#N/A
DN10988_c0_g1	3147	2948	2318	63	DN10988_c0_g1_i1	G150999	G1509992	2	3147	2948	2318	62.96	100	CDS	531	46.88	-1	HP	HPrule	Viruses	dsRNA viruses	unclassified dsRNA viruses	unclassified dsRNA viruses	Cystoviridae	Cystovirus	Pseudomonas virus phi6
DN10988_c0_g1	3147	2948	2318	63	DN10988_c0_g1_i1	G150999	G1509993	3	3147	2948	2318	62.96	100	CDS	180	#N/A	-1	HP	HPrule	Viruses	dsRNA viruses	unclassified dsRNA viruses	unclassified dsRNA viruses	Cystoviridae	Cystovirus	#N/A
DN10988_c0_g1	3147	2948	2318	63	DN10988_c0_g1_i1	G150999	G1509994	4	3147	2948	2318	62.96	100	CDS	156	#N/A	-1	HP	HPrule	Viruses	dsRNA viruses	unclassified dsRNA viruses	unclassified dsRNA viruses	Cystoviridae	Cystovirus	#N/A
DN8578_c0_g1	2777	2578	369	11.5	DN8578_c0_g1_i1	G150883	G1508831	1	2777	2578	369	11.46	100	CDS	165	#N/A	-1	HP	HPrule	Viruses	dsRNA viruses	unclassified dsRNA viruses	unclassified dsRNA viruses	Cystoviridae	Cystovirus	#N/A
DN8578_c0_g1	2777	2578	369	11.5	DN8578_c0_g1_i1	G150883	G1508832	2	2777	2578	369	11.46	100	CDS	1851	#N/A	-1	HP	HPrule	Viruses	dsRNA viruses	unclassified dsRNA viruses	unclassified dsRNA viruses	Cystoviridae	Cystovirus	#N/A
DN8578_c0_g1	2777	2578	369	11.5	DN8578_c0_g1_i1	G150883	G1508833	3	2777	2578	369	11.46	100	CDS	519	40.48	-1	HP	HPrule	Viruses	dsRNA viruses	unclassified dsRNA viruses	unclassified dsRNA viruses	Cystoviridae	Cystovirus	Pseudomonas virus phi6
DN8578_c0_g1	2777	2578	369	11.5	DN8578_c0_g1_i1	G150883	G1508834	4	2777	2578	369	11.46	100	CDS	195	#N/A	-1	HP	HPrule	Viruses	dsRNA viruses	unclassified dsRNA viruses	unclassified dsRNA viruses	Cystoviridae	Cystovirus	#N/A
DN10993_c0_g1	1854	1655.4	292420	14145.2	DN10993_c0_g1_i1	G150788	G1507881	1	2552	2353	275097	9361.95	66.18	CDS	1380	#N/A	1	HP	HPrule	Viruses	dsRNA viruses	unclassified dsRNA viruses	unclassified dsRNA viruses	Cystoviridae	Cystovirus	#N/A
DN10993_c0_g1	1854	1655.4	292420	14145.2	DN10993_c0_g1_i1	G150788	G1507883	3	2552	2353	275097	9361.95	66.18	CDS	399	43	1	HP	HPrule	Viruses	dsRNA viruses	unclassified dsRNA viruses	unclassified dsRNA viruses	Cystoviridae	Cystovirus	Pseudomonas virus phi6
DN3946_c0_g1	1080	881	248350	22573	DN3946_c0_g1_i1	G148283	G1482831	1	1080	881	248349	22573	100	CDS	267	53.41	-1	HP	HPrule	Viruses	dsRNA viruses	unclassified dsRNA viruses	unclassified dsRNA viruses	Cystoviridae	Cystovirus	Pseudomonas virus phi6
DN3946_c0_g1	1080	881	248350	22573	DN3946_c0_g1_i1	G148283	G1482832	2	1080	881	248349	22573	100	CDS	237	#N/A	-1	HP	HPrule	Viruses	dsRNA viruses	unclassified dsRNA viruses	unclassified dsRNA viruses	Cystoviridae	Cystovirus	#N/A
DN3946_c0_g1	1080	881	248350	22573	DN3946_c0_g1_i1	G148283	G1482833	3	1080	881	248349	22573	100	CDS	165	#N/A	-1	HP	HPrule	Viruses	dsRNA viruses	unclassified dsRNA viruses	unclassified dsRNA viruses	Cystoviridae	Cystovirus	#N/A
DN2770_c0_g1	302	103	14	10.9	DN2770_c0_g1_i1	G123722	G1237221		302	103	14	10.88	100	CDS	156	58.82	-1	HP	HPrule	Viruses	dsRNA viruses	unclassified dsRNA viruses	unclassified dsRNA viruses	Cystoviridae	Cystovirus	Pseudomonas virus phi6
DN2185_c0_g1	6076	5877	417	5.7	DN2185_c0_g1_i1	G151256	G1512561	1	6076	5877	417	5.68	100	CDS	207	#N/A	1	HP	HPrule	Viruses	dsDNA viruses, no RNA stage	unclassified dsDNA viruses, no RNA stage	Caudovirales	Myoviridae	Wphvirus	#N/A
DN2185_c0_g1	6076	5877	417	5.7	DN2185_c0_g1_i1	G151256	G1512562	2	6076	5877	417	5.68	100	CDS	1962	38.38	1	HP	HPrule	Viruses	dsDNA viruses, no RNA stage	unclassified dsDNA viruses, no RNA stage	Caudovirales	Myoviridae	Wphvirus	Thauera sp. 27
DN2185_c0_g1	6076	5877	417	5.7	DN2185_c0_g1_i1	G151256	G1512563	3	6076	5877	417	5.68	100	CDS	987	51.84	1	HP	HPrule	Viruses	dsDNA viruses, no RNA stage	unclassified dsDNA viruses, no RNA stage	Caudovirales	Myoviridae	Wphvirus	Thauera sp. 27
DN2185_c0_g1	6076	5877	417	5.7	DN2185_c0_g1_i1	G151256	G1512564	4	6076	5877	417	5.68	100	CDS	2160	34.13	1	HP	HPrule	Viruses	dsDNA viruses, no RNA stage	unclassified dsDNA viruses, no RNA stage	Caudovirales	Myoviridae	Wphvirus	Bacillus virus BPS13
DN2185_c0_g1	6076	5877	417	5.7	DN2185_c0_g1_i1	G151256	G1512565	5	6076	5877	417	5.68	100	CDS	738	#N/A	1	HP	HPrule	Viruses	dsDNA viruses, no RNA stage	unclassified dsDNA viruses, no RNA stage	Caudovirales	Myoviridae	Wphvirus	#N/A
DN11611_c0_g1	3743	3544	23049	520.8	DN11611_c0_g1_i1	G151098	G1510981	1	3743	3544	23049	520.79	100	CDS	1335	#N/A	1	HP	HPrule	Viruses	ssRNA (+) viruses	unclassified ssRNA (+) viruses	unclassified ssRNA (+) viruses	unclassified ssRNA (+) viruses	unclassified ssRNA (+) viruses	#N/A
DN11611_c0_g1	3743	3544	23049	520.8	DN11611_c0_g1_i1	G151098	G1510982	2	3743	3544	23049	520.79	100	CDS	369	#N/A	1	HP	HPrule	Viruses	ssRNA (+) viruses	unclassified ssRNA (+) viruses	unclassified ssRNA (+) viruses	unclassified ssRNA (+) viruses	unclassified ssRNA (+) viruses	#N/A
DN11611_c0_g1	3743	3544	23049	520.8	DN11611_c0_g1_i1	G151098	G1510983	3	3743	3544	23049	520.79	100	CDS	1791	43.48	1	HP	HPrule	Viruses	ssRNA (+) viruses	unclassified ssRNA (+) viruses	unclassified ssRNA (+) viruses	unclassified ssRNA (+) viruses	unclassified ssRNA (+) viruses	Beihai levi-like virus 17
DN11609_c0_g1	3683	3484	3874	89	DN11609_c0_g1_i1	G151088	G1510881	1	3683	3484	3874	89.04	100	CDS	1227	28.62	1	HP	HPrule	Viruses	ssRNA (+) viruses	unclassified ssRNA (+) viruses	unclassified ssRNA (+) viruses	unclassified ssRNA (+) viruses	unclassified ssRNA (+) viruses	Hubei levi-like virus 7
DN11609_c0_g1	3683	3484	3874	89	DN11609_c0_g1_i1	G151088	G1510882	2	3683	3484	3874	89.04	100	CDS	381	#N/A	1	HP	HPrule	Viruses	ssRNA (+) viruses	unclassified ssRNA (+) viruses	unclassified ssRNA (+) viruses	unclassified ssRNA (+) viruses	unclassified ssRNA (+) viruses	#N/A
DN11609_c0_g1	3683	3484	3874	89	DN11609_c0_g1_i1	G151088	G1510883	3	3683	3484	3874	89.04	100	CDS	1689	39.63	1	HP	HPrule	Viruses	ssRNA (+) viruses	unclassified ssRNA (+) viruses	unclassified ssRNA (+) viruses	unclassified ssRNA (+) viruses	unclassified ssRNA (+) viruses	Hubei levi-like virus 8
DN11584_c0_g2	1970	1771.1	1263	57.1	DN11584_c0_g2_i4	G150043	G1500433	3	1686	1487	170.68	9.19	16.1	CDS	537	42.31	1	HP	HPrule	Viruses	ssRNA (+) viruses	unclassified ssRNA (+) viruses	unclassified ssRNA (+) viruses	unclassified ssRNA (+) viruses	unclassified ssRNA (+) viruses	Beihai levi-like virus 24
DN11584_c0_g2	1970	1771.1	1263	57.1	DN11584_c0_g2_i4	G150043	G1500434	4	1686	1487	170.68	9.19	16.1	CDS	768	66.54	1	HP	HPrule	Viruses	ssRNA (+) viruses	unclassified ssRNA (+) viruses	unclassified ssRNA (+) viruses	unclassified ssRNA (+) viruses	unclassified ssRNA (+) viruses	Beihai levi-like virus 23
DN11584_c0_g2	1970	1771.1	1263	57.1	DN11584_c0_g2_i5	G150523	G1505231	1	2103	1904	453.21	19.06	33.38	CDS	159	#N/A	1	HP	HPrule	Viruses	ssRNA (+) viruses	unclassified ssRNA (+) viruses	unclassified ssRNA (+) viruses	unclassified ssRNA (+) viruses	unclassified ssRNA (+) viruses	#N/A
DN11584_c0_g2	1970	1771.1	1263	57.1	DN11584_c0_g2_i5	G150523	G1505233	3	2103	1904	453.21	19.06	33.38	CDS	1635	59.21	1	HP	HPrule	Viruses	ssRNA (+) viruses	unclassified ssRNA (+) viruses	unclassified ssRNA (+) viruses	unclassified ssRNA (+) viruses	unclassified ssRNA (+) viruses	Beihai levi-like virus 22
DN11584_c0_g1	1581	1382	717	41.5	DN11584_c0_g1_i2	G149877	G1498771	1	1581	1382	432.63	25.07	60.34	CDS	1146	34.18	1	HP	HPrule	Viruses	ssRNA (+) viruses	unclassified ssRNA (+) viruses	unclassified ssRNA (+) viruses	unclassified ssRNA (+) viruses	unclassified ssRNA (+) viruses	Beihai levi-like virus 23
DN11584_c0_g1	1581	1382	717	41.5	DN11584_c0_g1_i2	G149877	G1498772	2	1581	1382	432.63	25.07	60.34	CDS	330	#N/A	1	HP	HPrule	Viruses	ssRNA (+) viruses	unclassified ssRNA (+) viruses	unclassified ssRNA (+) viruses	unclassified ssRNA (+) viruses	unclassified ssRNA (+) viruses	#N/A
DN20484_c0_g1	421	222	6	2.2	DN20484_c0_g1_i1	G135657	G1356571		421	222	6	2.16	100	CDS	372	60.98	-1	uncharacterized protein DUF4043	pfam13252	Viruses	dsDNA viruses, no RNA stage	unclassified dsDNA viruses, no RNA stage	Caudovirales	Podoviridae	Bcep22virus	Burkholderia virus DC1
DN21007_c0_g1	291	92.1	4	3.5	DN21007_c0_g1_i1	G121827	G1218271	1	291	92.11	4	3.48	100	CDS	105	80	-1	HP	HPrule	Viruses	unclassified Viruses	unclassified Viruses	Caudovirales	Siphoviridae	unclassified Siphoviridae	Paracoccus phage vB_PmaS_IMEP1
DN21007_c0_g1	291	92.1	4	3.5	DN21007_c0_g1_i1	G121827	G1218272	2	291	92.11	4	3.48	100	CDS	168	76.36	-1	HP	HPrule	Viruses	unclassified Viruses	unclassified Viruses	Caudovirales	Siphoviridae	unclassified Siphoviridae	Paracoccus phage vB_PmaS_IMEP1
DN36272_c0_g1	226	37.8	4	8.5	DN36272_c0_g1_i1	G107154	G1071541		226	37.8	4	8.47	100	CDS	180	81.25	1	HP	HPrule	Viruses	dsDNA viruses, no RNA stage	unclassified dsDNA viruses, no RNA stage	Caudovirales	Myoviridae	unclassified Myoviridae	Ralstonia phage RSP15
DN36692_c0_g1	212	29.1	4	11	DN36692_c0_g1_i1	G103244	G1032441		212	29.05	4	11.03	100	CDS	210	80.88	1	HP	HPrule	Viruses	unclassified Viruses	unclassified Viruses	Caudovirales	Siphoviridae	unclassified Siphoviridae	Paracoccus phage vB_PmaS_IMEP1
DN34916_c0_g1	204	24.6	6	19.5	DN34916_c0_g1_i1	G100971	G1009711		204	24.6	6	19.53	100	CDS	204	63.64	-1	HP	HPrule	Viruses	unclassified Viruses	unclassified Viruses	Caudovirales	Siphoviridae	unclassified Siphoviridae	Paracoccus phage vB_PmaS_IMEP1
DN14486_c0_g1	201	23	3	10.4	DN14486_c0_g1_i1	G100051	G1000511		201	23.03	3	10.43	100	CDS	198	53.23	1	uncharacterized protein DUF4043	pfam13252	Viruses	dsDNA viruses, no RNA stage	unclassified dsDNA viruses, no RNA stage	Caudovirales	Podoviridae	unclassified Podoviridae	Erwinia phage PEp14

## Sheet: Others
Biofilm 300N-23C: others genera
					Number of Gene ID TrinityAssID Trinity (after removing doublon):							16160
					TPM (sum of the Gene ID Trinity )							394433
Gene count					Isoform count									Fonction						Affiliation finale
Gene ID Trinity	length	effective_length	expected_count	TPM	Transcript ID Trinity	Trc ID-JGI	ORF ID JGI		length	effective_length	expected_count	TPM	IsoPct	type	ORF length	%Ident	strand	Product name	source	lineage - domain	phylum	class	order	family	genus
DN24282_c0_g1	481	282	11	3.1	DN24282_c0_g1_i1	G138975	G1389751		481	282	11	3.12	100	CDS	459	43.94	-1	HP	HPrule	Archaea	Euryarchaeota	Halobacteria	Halobacteriales	Halococcaceae	Halococcus
DN48255_c0_g1	276	77.9	5	5.1	DN48255_c0_g1_i1	G119149	G1191491		276	77.89	5	5.14	100	CDS	273	58.24	1	HP	KO:K07124	Archaea	Euryarchaeota	Halobacteria	Haloferacales	Haloferacaceae	Halogranum
DN47081_c0_g1	330	131	3	1.8	DN47081_c0_g1_i1	G127624	G1276241	1	330	131	3	1.83	100	CDS	111	#N/A	-1	HP	HPrule	Archaea	Euryarchaeota	Halobacteria	Haloferacales	Haloferacaceae	Haloquadratum
DN47081_c0_g1	330	131	3	1.8	DN47081_c0_g1_i1	G127624	G1276242	2	330	131	3	1.83	100	CDS	252	53.95	-1	1,4-dihydroxy-2-naphthoate octaprenyltransferase	KO:K02548	Archaea	Euryarchaeota	Halobacteria	Haloferacales	Haloferacaceae	Haloquadratum
DN41216_c0_g1	327	128	5	3.1	DN41216_c0_g1_i1	G127191	G1271911		327	128	5	3.13	100	CDS	306	46.27	-1	5-methylcytosine-specific restriction endonuclease McrA	COG1403	Archaea	Euryarchaeota	Halobacteria	Haloferacales	Halorubraceae	Halorubrum
DN914_c0_g1	253	57.9	4	5.5	DN914_c0_g1_i1	G114326	G1143261		253	57.88	4	5.53	100	CDS	129	79.31	-1	succinate-semialdehyde dehydrogenase/glutarate-semialdehyde dehydrogenase	KO:K00135	Archaea	Euryarchaeota	Halobacteria	Haloferacales	Halorubraceae	Halorubrum
DN31770_c0_g1	447	248	13	4.2	DN31770_c0_g1_i1	G137256	G1372561		447	248	13	4.2	100	CDS	447	33.59	-1	ribonuclease E	KO:K08300	Archaea	Euryarchaeota	Halobacteria	Natrialbales	Natrialbaceae	Haloterrigena
DN48003_c0_g1	460	261	6	1.8	DN48003_c0_g1_i1	G137989	G1379891		460	261	6	1.84	100	CDS	402	30.21	1	asparagine synthase (glutamine-hydrolysing)	KO:K01953	Archaea	Euryarchaeota	Halobacteria	Natrialbales	Natrialbaceae	Natronorubrum
DN47764_c0_g1	217	32	3	7.5	DN47764_c0_g1_i1	G104704	G1047041		217	32.04	3	7.5	100	CDS	129	82.5	-1	putative transcriptional regulator	KO:K07729	Archaea	Euryarchaeota	Methanobacteria	Methanobacteriales	Methanobacteriaceae	Methanobacterium
DN19341_c0_g1	211	28.5	4	11.3	DN19341_c0_g1_i1	G102871	G1028711		211	28.47	4	11.25	100	CDS	210	47.83	1	HP	HPrule	Archaea	Euryarchaeota	Methanomicrobia	Methanocellales	Methanocellaceae	Methanocella
DN20507_c0_g1	388	189	4	1.7	DN20507_c0_g1_i1	G133315	G1333151		388	189	4	1.69	100	CDS	387	39.23	-1	HP	HPrule	Archaea	Euryarchaeota	Methanomicrobia	Methanomicrobiales	Methanomicrobiaceae	Methanolacinia
DN18146_c0_g1	223	35.8	3	6.7	DN18146_c0_g1_i1	G106252	G1062521		223	35.82	3	6.71	100	CDS	198	69.23	1	predicted RNase H-like HicB family nuclease	COG1598	Archaea	Euryarchaeota	Methanomicrobia	Methanosarcinales	Candidatus Methanoperedenaceae	Candidatus Methanoperedens
DN44540_c0_g1	262	65.4	6	7.3	DN44540_c0_g1_i1	G116276	G1162761		262	65.42	6	7.34	100	CDS	258	54.05	1	HP	HPrule	Archaea	Euryarchaeota	Methanomicrobia	Methanosarcinales	Candidatus Methanoperedenaceae	Candidatus Methanoperedens
DN19485_c0_g1	356	157	5	2.6	DN19485_c0_g1_i1	G130408	G1304081		356	157	5	2.55	100	CDS	354	36.11	1	cobalamin biosynthesis Mg chelatase CobN	COG1429	Archaea	Euryarchaeota	Methanomicrobia	Methanosarcinales	Methanosarcinaceae	Methanolobus
DN20785_c0_g1	427	228	10	3.5	DN20785_c0_g1_i1	G136071	G1360711		427	228	10	3.51	100	CDS	426	52.48	-1	type I restriction enzyme S subunit	KO:K01154	Archaea	Euryarchaeota	Methanomicrobia	Methanosarcinales	Methanosarcinaceae	Methanosarcina
DN26291_c0_g1	298	99	3	2.4	DN26291_c0_g1_i1	G123052	G1230521		298	99	3	2.43	100	CDS	225	48.98	-1	HP	HPrule	Archaea	Euryarchaeota	Methanomicrobia	Methanosarcinales	Methanosarcinaceae	Methanosarcina
DN33248_c0_g1	240	47.7	3	5	DN33248_c0_g1_i1	G110875	G1108751		240	47.71	3	5.04	100	CDS	195	43.75	1	HP	HPrule	Archaea	Euryarchaeota	Methanomicrobia	Methanosarcinales	Methanosarcinaceae	Methanosarcina
DN34597_c0_g1	211	28.5	2	5.6	DN34597_c0_g1_i1	G102948	G1029481		211	28.47	2	5.62	100	CDS	210	62.12	-1	demethylmenaquinone methyltransferase/2-methoxy-6-polyprenyl-1,4-benzoquinol methylase	KO:K03183	Archaea	Euryarchaeota	Methanomicrobia	Methanosarcinales	Methanosarcinaceae	Methanosarcina
DN43395_c0_g1	336	137	5	2.9	DN43395_c0_g1_i1	G128345	G1283451		336	137	5	2.92	100	CDS	333	48.62	1	ribonuclease R	KO:K12573	Archaea	Euryarchaeota	Methanomicrobia	Methanosarcinales	Methanosarcinaceae	Methanosarcina
DN30544_c0_g1	715	516	15	2.3	DN30544_c0_g1_i1	G145101	G1451011		715	516	15	2.33	100	CDS	714	39.57	1	HP	HPrule	Archaea	Euryarchaeota	Methanomicrobia	Methanosarcinales
DN35395_c0_g1	224	36.5	4	8.8	DN35395_c0_g1_i1	G106621	G1066211		224	36.47	4	8.78	100	CDS	222	65.57	-1	type I restriction enzyme R subunit	KO:K01153	Archaea	Euryarchaeota	Methanomicrobia	Methanosarcinales
DN23200_c0_g1	253	57.9	5	6.9	DN23200_c0_g1_i1	G114183	G1141831		253	57.88	5	6.92	100	CDS	252	50	-1	ornithine cyclodeaminase/alanine dehydrogenase	KO:K01750,KO:K19244	Archaea	Euryarchaeota	Thermococci	Thermococcales	Thermococcaceae	Thermococcus
DN16932_c0_g1	212	29.1	3	8.3	DN16932_c0_g1_i1	G103132	G1031321		212	29.05	3	8.27	100	CDS	210	41.67	-1	diacylglycerol kinase family enzyme	COG1597	Archaea	Euryarchaeota	Thermoplasmata	Thermoplasmatales
DN32637_c0_g1	395	196	6	2.5	DN32637_c0_g1_i1	G133852	G1338521		395	196	6	2.45	100	CDS	393	53.23	1	uncharacterized protein DUF5011	pfam16403	Archaea	Thaumarchaeota	unclassified Thaumarchaeota	Nitrosopumilales	Nitrosopumilaceae	Nitrosopumilus
DN22732_c0_g1	450	251	8	2.6	DN22732_c0_g1_i1	G137416	G1374161		450	251	8	2.55	100	CDS	450	27.78	-1	HP	HPrule	Archaea	Thaumarchaeota	unclassified Thaumarchaeota	unclassified Thaumarchaeota	unclassified Thaumarchaeota	Candidatus Nitrosotalea
DN32131_c0_g1	292	93.1	8	6.9	DN32131_c0_g1_i1	G122052	G1220521		292	93.08	8	6.88	100	CDS	282	43.37	1	ATP-dependent Lon protease/HP	KO:K01338,KO:K07157	Bacteria	Acidobacteria	Acidobacteriia	Acidobacteriales	Acidobacteriaceae	Acidobacterium
DN8463_c0_g1	421	222	4	1.4	DN8463_c0_g1_i1	G135710	G1357101		421	222	4	1.44	100	CDS	393	46.43	-1	ECF sigma factor	pfam07638	Bacteria	Acidobacteria	Acidobacteriia	Acidobacteriales	Acidobacteriaceae	Candidatus Koribacter
DN1727_c0_g1	297	98	5	4.1	DN1727_c0_g1_i1	G122860	G1228601		297	98.01	5	4.09	100	CDS	294	40.23	-1	DNA-binding winged helix-turn-helix (wHTH) protein	COG3710	Bacteria	Acidobacteria	Acidobacteriia	Acidobacteriales	Acidobacteriaceae	Terracidiphilus
DN39587_c0_g1	304	105	5	3.8	DN39587_c0_g1_i1	G124074	G1240741		304	105	5	3.81	100	CDS	303	53.12	-1	HP	HPrule	Bacteria	Acidobacteria	Acidobacteriia	Acidobacteriales	Acidobacteriaceae	Terriglobus
DN7184_c0_g1	375	176	25	11.4	DN7184_c0_g1_i2	G132235	G1322351	1	375	176	13.1	5.96	52.38	CDS	345	34.94	-1	HP	HPrule	Bacteria	Acidobacteria	Acidobacteriia	Acidobacteriales	Acidobacteriaceae
DN469_c0_g1	218	32.7	5	12.3	DN469_c0_g1_i1	G104993	G1049931		218	32.65	5	12.26	100	CDS	216	58.67	1	HP	HPrule	Bacteria	Acidobacteria	Blastocatellia	unclassified Blastocatellia	unclassified Blastocatellia	Chloracidobacterium
DN4001_c0_g1	237	45.5	6	10.6	DN4001_c0_g1_i1	G110110	G1101101		237	45.49	6	10.56	100	CDS	237	81.01	-1	cytochrome c oxidase subunit 1	KO:K02274	Bacteria	Acidobacteria	Holophagae	Holophagales	Holophagaceae	Holophaga
DN15775_c0_g1	427	228	6	2.1	DN15775_c0_g1_i1	G136061	G1360611		427	228	6	2.11	100	CDS	375	37.38	-1	quercetin dioxygenase-like cupin family protein	COG1917	Bacteria	Acidobacteria	Solibacteres	Solibacterales	Bryobacteraceae	Bryobacter
DN47952_c0_g1	202	23.6	3	10.2	DN47952_c0_g1_i1	G100511	G1005111		202	23.55	3	10.2	100	CDS	198	45.76	-1	ECF sigma factor	pfam07638	Bacteria	Acidobacteria	Solibacteres	Solibacterales	Bryobacteraceae	Bryobacter
DN46756_c0_g1	403	204	6	2.4	DN46756_c0_g1_i1	G134461	G1344611		403	204	6	2.36	100	CDS	339	38.39	1	DNA-binding IscR family transcriptional regulator	COG1959	Bacteria	Acidobacteria	unclassified Acidobacteria	unclassified Acidobacteria	unclassified Acidobacteria	Luteitalea
DN11344_c2_g3	371	172	11	5.1	DN11344_c2_g3_i1	G131813	G1318131		371	172	11	5.12	100	CDS	369	87.8	1	Fe-S cluster assembly protein SufB	KO:K09014	Bacteria	Actinobacteria	Acidimicrobiia	Acidimicrobiales	Acidimicrobiaceae	Ilumatobacter
DN35767_c0_g1	256	60.4	3	4	DN35767_c0_g1_i1	G114918	G1149181		256	60.35	3	3.98	100	CDS	255	45.88	-1	2-oxoglutarate dehydrogenase E2 component (dihydrolipoamide succinyltransferase)	KO:K00658	Bacteria	Actinobacteria	Acidimicrobiia	Acidimicrobiales	Acidimicrobiaceae	Ilumatobacter
DN4232_c0_g1	391	192	1	0.4	DN4232_c0_g1_i1	G133561	G1335611	1	391	192	1	0.42	100	CDS	213	48.39	-1	chromosome partitioning protein	KO:K03496	Bacteria	Actinobacteria	Actinobacteria	Candidatus Nanopelagicales	unclassified Candidatus Nanopelagicales	Candidatus Nanopelagicus
DN4232_c0_g1	391	192	1	0.4	DN4232_c0_g1_i1	G133561	G1335612	2	391	192	1	0.42	100	CDS	228	46.27	-1	chromosome partitioning protein	KO:K03496	Bacteria	Actinobacteria	Actinobacteria	Candidatus Nanopelagicales	unclassified Candidatus Nanopelagicales	Candidatus Nanopelagicus
DN14773_c0_g1	270	72.4	4	4.4	DN14773_c0_g1_i1	G117859	G1178591		270	72.44	4	4.42	100	CDS	267	67.82	1	HP	KO:K07045	Bacteria	Actinobacteria	Actinobacteria	Candidatus Nanopelagicales	unclassified Candidatus Nanopelagicales	Candidatus Planktophila
DN28887_c0_g1	259	62.9	4	5.1	DN28887_c0_g1_i1	G115565	G1155651		259	62.86	4	5.1	100	CDS	258	56.25	1	HP	KO:K07071	Bacteria	Actinobacteria	Actinobacteria	Candidatus Nanopelagicales	unclassified Candidatus Nanopelagicales	Candidatus Planktophila
DN37570_c0_g1	281	82.5	4	3.9	DN37570_c0_g1_i1	G120082	G1200821		281	82.54	4	3.88	100	CDS	186	70.91	-1	pyruvate dehydrogenase E1 component alpha subunit	KO:K00161	Bacteria	Actinobacteria	Actinobacteria	Corynebacteriales	Corynebacteriaceae	Corynebacterium
DN21591_c0_g1	211	28.5	3	8.4	DN21591_c0_g1_i1	G102883	G1028831		211	28.47	3	8.44	100	CDS	210	81.43	1	xylulose-5-phosphate/fructose-6-phosphate phosphoketolase	KO:K01621	Bacteria	Actinobacteria	Actinobacteria	Corynebacteriales	Mycobacteriaceae	Mycobacterium
DN27857_c0_g1	404	205	11	4.3	DN27857_c0_g1_i1	G134502	G1345021		404	205	11	4.3	100	CDS	402	72.28	-1	proteasome accessory factor A	KO:K13571	Bacteria	Actinobacteria	Actinobacteria	Corynebacteriales	Mycobacteriaceae	Mycobacterium
DN29682_c0_g1	317	118	6	4.1	DN29682_c0_g1_i1	G125869	G1258691		317	118	6	4.07	100	CDS	249	53.09	1	DNA-binding protein HU-beta	KO:K03530	Bacteria	Actinobacteria	Actinobacteria	Corynebacteriales	Mycobacteriaceae	Mycobacterium
DN47876_c0_g1	294	95	5	4.2	DN47876_c0_g1_i1	G122464	G1224641		294	95.04	5	4.21	100	CDS	291	36.73	-1	HP	HPrule	Bacteria	Actinobacteria	Actinobacteria	Corynebacteriales	Mycobacteriaceae	Mycobacterium
DN16462_c0_g1	295	96	8	6.7	DN16462_c0_g1_i1	G122536	G1225361		295	96.03	8	6.67	100	CDS	294	51.09	1	histidinol-phosphate aminotransferase	KO:K00817	Bacteria	Actinobacteria	Actinobacteria	Corynebacteriales	Nocardiaceae	Nocardia
DN21628_c0_g1	253	57.9	719	994.8	DN21628_c0_g1_i1	G114173	G1141731		253	57.88	719	994.76	100	CDS	147	100	-1	HP	HPrule	Bacteria	Actinobacteria	Actinobacteria	Corynebacteriales	Nocardiaceae	Nocardia
DN35916_c0_g1	311	112	6	4.3	DN35916_c0_g1_i1	G125057	G1250571	1	311	112	6	4.29	100	CDS	180	58.33	-1	aldehyde dehydrogenase (NAD+)	KO:K00128	Bacteria	Actinobacteria	Actinobacteria	Corynebacteriales	Nocardiaceae	Nocardia
DN35916_c0_g1	311	112	6	4.3	DN35916_c0_g1_i1	G125057	G1250572	2	311	112	6	4.29	100	CDS	99	#N/A	-1	HP	HPrule	Bacteria	Actinobacteria	Actinobacteria	Corynebacteriales	Nocardiaceae	Nocardia
DN41740_c0_g1	247	53.1	3	4.5	DN41740_c0_g1_i1	G112817	G1128171		247	53.07	3	4.53	100	CDS	243	38.27	1	polyketide synthase-like dehydratase family protein	pfam14765	Bacteria	Actinobacteria	Actinobacteria	Corynebacteriales	Nocardiaceae	Nocardia
DN48605_c0_g1	250	55.5	4	5.8	DN48605_c0_g1_i1	G113634	G1136341		250	55.45	4	5.78	100	CDS	249	47.46	-1	uncharacterized protein DUF4339	pfam14237	Bacteria	Actinobacteria	Actinobacteria	Corynebacteriales	Nocardiaceae	Nocardia
DN32667_c0_g1	246	52.3	4	6.1	DN32667_c0_g1_i1	G112517	G1125171		246	52.29	4	6.13	100	CDS	243	54.67	-1	fatty-acyl-CoA synthase	KO:K00666	Bacteria	Actinobacteria	Actinobacteria	Corynebacteriales	Tsukamurellaceae	Tsukamurella
DN35162_c0_g1	234	43.3	3	5.6	DN35162_c0_g1_i1	G109268	G1092681	1	234	43.32	3	5.55	100	CDS	117	68.42	1	HP	HPrule	Bacteria	Actinobacteria	Actinobacteria	Frankiales	Frankiaceae	Frankia
DN35162_c0_g1	234	43.3	3	5.6	DN35162_c0_g1_i1	G109268	G1092682	2	234	43.32	3	5.55	100	CDS	99	#N/A	1	HP	HPrule	Bacteria	Actinobacteria	Actinobacteria	Frankiales	Frankiaceae	Frankia
DN7317_c0_g1	391	192	7	2.9	DN7317_c0_g1_i1	G133579	G1335791	1	391	192	7	2.92	100	CDS	294	44.9	-1	HP	HPrule	Bacteria	Actinobacteria	Actinobacteria	Frankiales
DN7317_c0_g1	391	192	7	2.9	DN7317_c0_g1_i1	G133579	G1335792	2	391	192	7	2.92	100	CDS	99	#N/A	-1	HP	HPrule	Bacteria	Actinobacteria	Actinobacteria	Frankiales
DN33703_c0_g1	654	455	16	2.8	DN33703_c0_g1_i1	G144069	G1440691		654	455	16	2.82	100	CDS	651	40.83	-1	HP	HPrule	Bacteria	Actinobacteria	Actinobacteria	Geodermatophilales	Geodermatophilaceae	Geodermatophilus
DN26082_c0_g1	314	115	3	2.1	DN26082_c0_g1_i1	G125437	G1254371		314	115	3	2.09	100	CDS	312	47.62	1	HP	HPrule	Bacteria	Actinobacteria	Actinobacteria	Glycomycetales	Glycomycetaceae	Stackebrandtia
DN37316_c0_g1	514	315	20	5.1	DN37316_c0_g1_i1	G140353	G1403531		514	315	20	5.08	100	CDS	513	61.45	-1	HP	HPrule	Bacteria	Actinobacteria	Actinobacteria	Glycomycetales	Glycomycetaceae	Stackebrandtia
DN32745_c0_g1	307	108	8	5.9	DN32745_c0_g1_i1	G124470	G1244701		307	108	8	5.93	100	CDS	303	54	1	recombination protein RecR	KO:K06187	Bacteria	Actinobacteria	Actinobacteria	Micrococcales	Brevibacteriaceae	Brevibacterium
DN32859_c0_g1	379	180	5	2.2	DN32859_c0_g1_i1	G132560	G1325601		379	180	5	2.22	100	CDS	378	41.67	1	AcrR family transcriptional regulator	COG1309	Bacteria	Actinobacteria	Actinobacteria	Micrococcales	Brevibacteriaceae	Brevibacterium
DN33696_c0_g1	267	69.8	4	4.6	DN33696_c0_g1_i1	G117320	G1173201		267	69.78	4	4.59	100	CDS	183	72.97	-1	cobalt-zinc-cadmium efflux system protein	KO:K16264	Bacteria	Actinobacteria	Actinobacteria	Micrococcales	Brevibacteriaceae	Brevibacterium
DN38501_c0_g1	242	49.2	3	4.9	DN38501_c0_g1_i1	G111458	G1114581		242	49.21	3	4.88	100	CDS	240	58.33	1	propionyl-CoA carboxylase beta chain	KO:K01966	Bacteria	Actinobacteria	Actinobacteria	Micrococcales	Intrasporangiaceae	Knoellia
DN40938_c0_g1	395	196	7	2.9	DN40938_c0_g1_i1	G133871	G1338711		395	196	7	2.86	100	CDS	393	44.7	-1	HP	HPrule	Bacteria	Actinobacteria	Actinobacteria	Micrococcales	Intrasporangiaceae	Terrabacter
DN1100_c0_g1	310	111	7	5.1	DN1100_c0_g1_i1	G124825	G1248251		310	111	7	5.05	100	CDS	210	78.26	-1	DUF2945 family protein	pfam11160	Bacteria	Actinobacteria	Actinobacteria	Micrococcales	Microbacteriaceae	Microbacterium
DN37298_c0_g1	270	72.4	8	8.8	DN37298_c0_g1_i1	G117948	G1179481		270	72.44	8	8.84	100	CDS	267	42.11	1	HP	HPrule	Bacteria	Actinobacteria	Actinobacteria	Micrococcales	Microbacteriaceae	Plantibacter
DN44065_c0_g1	247	53.1	5	7.5	DN44065_c0_g1_i1	G112832	G1128321		247	53.07	5	7.54	100	CDS	246	61.73	1	peptide/nickel transport system substrate-binding protein	KO:K02035	Bacteria	Actinobacteria	Actinobacteria	Micrococcales	Microbacteriaceae	Salinibacterium
DN15198_c0_g1	203	24.1	3	10	DN15198_c0_g1_i1	G100598	G1005981		203	24.07	3	9.98	100	CDS	201	74.24	-1	dihydropyrimidinase/dihydroorotase	KO:K01464,KO:K01465	Bacteria	Actinobacteria	Actinobacteria	Micrococcales	Micrococcaceae	Arthrobacter
DN22487_c0_g1	224	36.5	6	13.2	DN22487_c0_g1_i1	G106543	G1065431		224	36.47	6	13.17	100	CDS	183	49.18	1	3-methylcrotonyl-CoA carboxylase beta subunit	KO:K01969	Bacteria	Actinobacteria	Actinobacteria	Micrococcales	Micrococcaceae	Arthrobacter
DN37365_c0_g1	1085	886	61	5.5	DN37365_c0_g1_i1	G148312	G1483121		1085	886	61	5.51	100	CDS	1029	26.26	-1	Flp pilus assembly CpaF family ATPase	COG4962	Bacteria	Actinobacteria	Actinobacteria	Micrococcales	Micrococcaceae	Arthrobacter
DN41354_c0_g1	236	44.8	6	10.7	DN41354_c0_g1_i1	G109869	G1098691		236	44.76	6	10.73	100	CDS	234	87.18	1	3-methylcrotonyl-CoA carboxylase beta subunit	KO:K01969	Bacteria	Actinobacteria	Actinobacteria	Micrococcales	Micrococcaceae	Kocuria
DN47104_c0_g1	266	68.9	4	4.7	DN47104_c0_g1_i1	G117166	G1171661		266	68.9	4	4.65	100	CDS	264	50.67	-1	2-dehydropantoate 2-reductase	KO:K00077	Bacteria	Actinobacteria	Actinobacteria	Micromonosporales	Micromonosporaceae	Actinoplanes
DN12793_c0_g1	257	61.2	8	10.5	DN12793_c0_g1_i1	G115039	G1150391		257	61.18	8	10.47	100	CDS	255	47.14	1	D-arabinonate dehydratase/D-galactarolactone cycloisomerase	KO:K01683,KO:K18983	Bacteria	Actinobacteria	Actinobacteria	Micromonosporales	Micromonosporaceae	Catelliglobosispora
DN18749_c0_g1	221	34.5	3	7	DN18749_c0_g1_i1	G105682	G1056821		221	34.54	3	6.96	100	CDS	219	86.3	1	Xaa-Pro aminopeptidase	COG0006	Bacteria	Actinobacteria	Actinobacteria	Micromonosporales	Micromonosporaceae	Micromonospora
DN36345_c0_g1	350	151	4	2.1	DN36345_c0_g1_i1	G129832	G1298321		350	151	4	2.12	100	CDS	249	53.85	1	HP	HPrule	Bacteria	Actinobacteria	Actinobacteria	Micromonosporales	Micromonosporaceae	Micromonospora
DN47402_c0_g1	371	172	5	2.3	DN47402_c0_g1_i1	G131873	G1318731		371	172	5	2.33	100	CDS	369	43.9	1	HP	HPrule	Bacteria	Actinobacteria	Actinobacteria	Micromonosporales	Micromonosporaceae	Micromonospora
DN41797_c0_g1	249	54.7	6	8.8	DN41797_c0_g1_i1	G113355	G1133551		249	54.65	6	8.79	100	CDS	246	50.62	-1	HP	HPrule	Bacteria	Actinobacteria	Actinobacteria	Nakamurellales	Nakamurellaceae	Nakamurella
DN22324_c0_g1	261	64.6	3	3.7	DN22324_c0_g1_i1	G115982	G1159821		261	64.57	3	3.72	100	CDS	258	64.58	1	uncharacterized protein YbjT (DUF2867 family)	COG0702	Bacteria	Actinobacteria	Actinobacteria	Propionibacteriales	Nocardioidaceae	Friedmanniella
DN18595_c0_g1	261	64.6	6	7.4	DN18595_c0_g1_i1	G115966	G1159661		261	64.57	6	7.44	100	CDS	261	72.41	-1	HP	HPrule	Bacteria	Actinobacteria	Actinobacteria	Propionibacteriales	Nocardioidaceae	Nocardioides
DN31063_c0_g1	360	161	9	4.5	DN31063_c0_g1_i1	G130830	G1308301		360	161	9	4.48	100	CDS	357	56.64	-1	HP	HPrule	Bacteria	Actinobacteria	Actinobacteria	Propionibacteriales	Nocardioidaceae	Nocardioides
DN37807_c0_g1	1071	872	39	3.6	DN37807_c0_g1_i1	G148238	G1482381	1	1071	872	39	3.58	100	CDS	906	42.45	1	HP	HPrule	Bacteria	Actinobacteria	Actinobacteria	Propionibacteriales	Nocardioidaceae	Nocardioides
DN37807_c0_g1	1071	872	39	3.6	DN37807_c0_g1_i1	G148238	G1482382	2	1071	872	39	3.58	100	CDS	78	#N/A	-1	HP	HPrule	Bacteria	Actinobacteria	Actinobacteria	Propionibacteriales	Nocardioidaceae	Nocardioides
DN41661_c0_g1	255	59.5	9	12.1	DN41661_c0_g1_i1	G114733	G1147331		255	59.52	9	12.11	100	CDS	252	50	-1	HP	HPrule	Bacteria	Actinobacteria	Actinobacteria	Propionibacteriales	Nocardioidaceae	Nocardioides
DN42563_c0_g1	235	44	5	9.1	DN42563_c0_g1_i1	G109594	G1095941		235	44.04	5	9.09	100	CDS	234	40.51	-1	HP	HPrule	Bacteria	Actinobacteria	Actinobacteria	Propionibacteriales	Nocardioidaceae	Nocardioides
DN47641_c0_g1	228	39.1	7	14.3	DN47641_c0_g1_i1	G107786	G1077861		228	39.14	7	14.32	100	CDS	225	50	-1	HP	HPrule	Bacteria	Actinobacteria	Actinobacteria	Propionibacteriales	Nocardioidaceae	Nocardioides
DN9659_c0_g1	923	723.8	54	6	DN9659_c0_g1_i2	G148279	G1482791	1	1079	880	29.29	2.67	44.61	CDS	1077	45.62	-1	HP	HPrule	Bacteria	Actinobacteria	Actinobacteria	Propionibacteriales	Propionibacteriaceae	Microlunatus
DN266_c0_g1	212	29.1	3	8.3	DN266_c0_g1_i1	G103184	G1031841		212	29.05	3	8.27	100	CDS	210	55.71	-1	thiol peroxidase	KO:K11065	Bacteria	Actinobacteria	Actinobacteria	Propionibacteriales	Propionibacteriaceae	Tessaracoccus
DN7850_c0_g1	206	25.7	4	12.5	DN7850_c0_g1_i1	G101643	G1016431		206	25.67	4	12.48	100	CDS	204	57.35	-1	thiol peroxidase	KO:K11065	Bacteria	Actinobacteria	Actinobacteria	Propionibacteriales	Propionibacteriaceae	Tessaracoccus
DN12093_c0_g1	610	411	16	3.1	DN12093_c0_g1_i1	G143123	G1431231	1	610	411	16	3.12	100	CDS	186	#N/A	1	HP	HPrule	Bacteria	Actinobacteria	Actinobacteria	Pseudonocardiales	Pseudonocardiaceae	Amycolatopsis
DN12093_c0_g1	610	411	16	3.1	DN12093_c0_g1_i1	G143123	G1431232	2	610	411	16	3.12	100	CDS	267	#N/A	-1	HP	HPrule	Bacteria	Actinobacteria	Actinobacteria	Pseudonocardiales	Pseudonocardiaceae	Amycolatopsis
DN12093_c0_g1	610	411	16	3.1	DN12093_c0_g1_i1	G143123	G1431233	3	610	411	16	3.12	100	CDS	183	52.73	1	HP	HPrule	Bacteria	Actinobacteria	Actinobacteria	Pseudonocardiales	Pseudonocardiaceae	Amycolatopsis
DN28264_c0_g1	431	232	13	4.5	DN28264_c0_g1_i1	G136335	G1363351		431	232	13	4.49	100	CDS	429	75.35	-1	peptide-methionine (S)-S-oxide reductase	KO:K07304	Bacteria	Actinobacteria	Actinobacteria	Pseudonocardiales	Pseudonocardiaceae	Amycolatopsis
DN31024_c0_g1	337	138	8	4.6	DN31024_c0_g1_i1	G128439	G1284391		337	138	8	4.64	100	CDS	207	49.21	1	HP	HPrule	Bacteria	Actinobacteria	Actinobacteria	Pseudonocardiales	Pseudonocardiaceae	Lentzea
DN36282_c0_g1	209	27.3	4	11.7	DN36282_c0_g1_i1	G102406	G1024061		209	27.33	4	11.72	100	CDS	207	53.62	1	AcrR family transcriptional regulator	COG1309	Bacteria	Actinobacteria	Actinobacteria	Pseudonocardiales	Pseudonocardiaceae	Pseudonocardia
DN11749_c0_g1	340	141	4	2.3	DN11749_c0_g1_i1	G128730	G1287301		340	141	4	2.27	100	CDS	336	45.1	-1	predicted transcriptional regulator	COG1497	Bacteria	Actinobacteria	Actinobacteria	Pseudonocardiales	Pseudonocardiaceae	Saccharopolyspora
DN29668_c0_g1	305	106	5	3.8	DN29668_c0_g1_i1	G124197	G1241971		305	106	5	3.78	100	CDS	303	69.7	-1	subtilase family protein	pfam00082	Bacteria	Actinobacteria	Actinobacteria	Pseudonocardiales	Pseudonocardiaceae	Saccharothrix
DN32997_c0_g1	236	44.8	5	9	DN32997_c0_g1_i1	G109814	G1098141		236	44.76	5	8.95	100	CDS	234	40	1	IclR family acetate operon transcriptional repressor	KO:K13641	Bacteria	Actinobacteria	Actinobacteria	Pseudonocardiales	Pseudonocardiaceae	Sciscionella
DN26049_c0_g1	637	438	13	2.4	DN26049_c0_g1_i1	G143731	G1437311	1	637	438	13	2.38	100	CDS	264	#N/A	-1	HP	HPrule	Bacteria	Actinobacteria	Actinobacteria	Streptomycetales	Streptomycetaceae	Kitasatospora
DN26049_c0_g1	637	438	13	2.4	DN26049_c0_g1_i1	G143731	G1437312	2	637	438	13	2.38	100	CDS	348	59.42	-1	HP	HPrule	Bacteria	Actinobacteria	Actinobacteria	Streptomycetales	Streptomycetaceae	Kitasatospora
DN4819_c0_g1	749	550	24	3.5	DN4819_c0_g1_i1	G145596	G1455961	1	749	550	24	3.49	100	CDS	141	100	1	small subunit ribosomal protein S11	KO:K02948	Bacteria	Actinobacteria	Actinobacteria	Streptomycetales	Streptomycetaceae
DN4819_c0_g1	749	550	24	3.5	DN4819_c0_g1_i1	G145596	G1455962	2	749	550	24	3.49	100	CDS	465	100	1	DNA-directed RNA polymerase subunit alpha	KO:K03040	Bacteria	Actinobacteria	Actinobacteria	Streptomycetales	Streptomycetaceae
DN5746_c0_g1	295	96	10	8.3	DN5746_c0_g1_i1	G122653	G1226531		295	96.03	10	8.34	100	CDS	291	34.57	-1	HP	HPrule	Bacteria	Actinobacteria	Actinobacteria	Streptosporangiales	Nocardiopsaceae	Nocardiopsis
DN22467_c0_g1	302	103	6	4.7	DN22467_c0_g1_i1	G123704	G1237041		302	103	6	4.66	100	CDS	300	67.53	-1	NAD+ synthase (glutamine-hydrolysing)	KO:K01950	Bacteria	Actinobacteria	Actinobacteria	Streptosporangiales	Streptosporangiaceae	Microbispora
DN36733_c0_g1	275	77	6	6.2	DN36733_c0_g1_i1	G118922	G1189221		275	76.97	6	6.24	100	CDS	273	80.22	-1	peptide-methionine (S)-S-oxide reductase	KO:K07304	Bacteria	Actinobacteria	Actinobacteria	Streptosporangiales	Streptosporangiaceae	Nonomuraea
DN18036_c0_g1	349	150	5	2.7	DN18036_c0_g1_i1	G129687	G1296871		349	150	5	2.67	100	CDS	306	68.37	1	adenosylmethionine-8-amino-7-oxononanoate aminotransferase	KO:K00833	Bacteria	Actinobacteria	Actinobacteria	Streptosporangiales	Thermomonosporaceae	Actinomadura
DN48588_c0_g1	284	85.4	2	1.9	DN48588_c0_g1_i1	G120711	G1207111		284	85.37	2	1.88	100	CDS	282	54.44	1	fatty-acyl-CoA synthase	KO:K00666	Bacteria	Actinobacteria	Actinobacteria	Streptosporangiales	Thermomonosporaceae	Actinomadura
DN35521_c0_g1	296	97	4	3.3	DN35521_c0_g1_i1	G122766	G1227661		296	97.02	4	3.3	100	CDS	294	98.92	1	lipoic acid synthetase	KO:K03644	Bacteria	Actinobacteria	Actinobacteria
DN5813_c0_g1	878	679	67	7.9	DN5813_c0_g1_i1	G146954	G1469541	1	878	679	67	7.9	100	CDS	285	#N/A	1	HP	HPrule	Bacteria	Actinobacteria	Coriobacteriia	Coriobacteriales	Coriobacteriaceae	Collinsella
DN5813_c0_g1	878	679	67	7.9	DN5813_c0_g1_i1	G146954	G1469542	2	878	679	67	7.9	100	CDS	237	#N/A	1	HP	HPrule	Bacteria	Actinobacteria	Coriobacteriia	Coriobacteriales	Coriobacteriaceae	Collinsella
DN5813_c0_g1	878	679	67	7.9	DN5813_c0_g1_i1	G146954	G1469543	3	878	679	67	7.9	100	CDS	195	55	1	DNA-binding transcriptional regulator YiaG	COG2944	Bacteria	Actinobacteria	Coriobacteriia	Coriobacteriales	Coriobacteriaceae	Collinsella
DN5813_c0_g1	878	679	67	7.9	DN5813_c0_g1_i1	G146954	G1469544	4	878	679	67	7.9	100	CDS	84	#N/A	1	HP	HPrule	Bacteria	Actinobacteria	Coriobacteriia	Coriobacteriales	Coriobacteriaceae	Collinsella
DN26016_c0_g1	230	40.5	4	7.9	DN26016_c0_g1_i1	G108188	G1081881		230	40.51	4	7.91	100	CDS	228	46.67	1	ATP-binding cassette subfamily B protein	KO:K06147	Bacteria	Actinobacteria	Coriobacteriia	Coriobacteriales	Coriobacteriaceae	Enorma
DN1427_c0_g1	261	64.6	4	5	DN1427_c0_g1_i1	G115941	G1159411		261	64.57	4	4.96	100	CDS	231	51.52	-1	HP	HPrule	Bacteria	Actinobacteria	Rubrobacteria	Rubrobacterales	Rubrobacteraceae	Rubrobacter
DN47240_c0_g1	226	37.8	3	6.4	DN47240_c0_g1_i1	G107202	G1072021		226	37.8	3	6.36	100	CDS	225	69.12	-1	two-component system sensor histidine kinase/response regulator	KO:K11527	Bacteria	Actinobacteria	Rubrobacteria	Rubrobacterales	Rubrobacteraceae	Rubrobacter
DN39513_c0_g1	648	449	35	6.2	DN39513_c0_g1_i1	G143956	G1439561	1	648	449	35	6.24	100	CDS	138	#N/A	1	HP	HPrule	Bacteria	Actinobacteria	Thermoleophilia	Solirubrobacterales	Patulibacteraceae	Patulibacter
DN39513_c0_g1	648	449	35	6.2	DN39513_c0_g1_i1	G143956	G1439562	2	648	449	35	6.24	100	CDS	534	27.91	-1	parvulin-like peptidyl-prolyl isomerase	COG0760	Bacteria	Actinobacteria	Thermoleophilia	Solirubrobacterales	Patulibacteraceae	Patulibacter
DN11625_c0_g1	4385	4186	1124	21.5	DN11625_c0_g1_i1	G150900	G1509001	1	2828	2629	447.67	13.64	63.42	CDS	444	46.81	-1	branched-chain amino acid transport system permease protein	KO:K01998	Bacteria	Actinobacteria
DN44231_c0_g1	208	26.8	4	12	DN44231_c0_g1_i1	G102172	G1021721		208	26.77	4	11.96	100	CDS	207	46.03	1	two-component system phosphate regulon sensor histidine kinase PhoR	KO:K07636	Bacteria	Aerophobetes	unclassified Aerophobetes	unclassified Aerophobetes	unclassified Aerophobetes	Candidatus Aerophobus
DN19050_c0_g1	222	35.2	4	9.1	DN19050_c0_g1_i1	G105966	G1059661		222	35.18	4	9.11	100	CDS	222	73.61	-1	HP	KO:K09803	Bacteria	Aerophobetes
DN14225_c0_g1	235	44	4	7.3	DN14225_c0_g1_i1	G109427	G1094271		235	44.04	4	7.27	100	CDS	231	43.84	-1	HP	HPrule	Bacteria	Aminicenantes
DN19451_c0_g1	608	409	12	2.4	DN19451_c0_g1_i1	G143076	G1430761		608	409	12	2.35	100	CDS	606	58.91	1	peptidyl-dipeptidase Dcp	KO:K01284	Bacteria	Aminicenantes
DN25917_c0_g1	238	46.2	3	5.2	DN25917_c0_g1_i1	G110300	G1103001		238	46.22	3	5.2	100	CDS	234	76.92	-1	uncharacterized Zn-binding protein involved in type VI secretion	COG4104	Bacteria	Aminicenantes
DN28534_c0_g1	628	429	10	1.9	DN28534_c0_g1_i1	G143544	G1435441		628	429	10	1.87	100	CDS	627	65.87	1	oligopeptidase B	KO:K01354	Bacteria	Aminicenantes
DN29642_c0_g1	269	71.6	4	4.5	DN29642_c0_g1_i1	G117706	G1177061		269	71.55	4	4.48	100	CDS	267	69.66	-1	dipeptidyl aminopeptidase/acylaminoacyl peptidase	COG1506	Bacteria	Aminicenantes
DN2973_c0_g1	679	480	66	11	DN2973_c0_g1_i1	G144506	G1445061		679	480	66	11.01	100	CDS	480	72.78	-1	DUF2911 family protein	pfam11138	Bacteria	Aminicenantes
DN31239_c0_g1	398	199	4	1.6	DN31239_c0_g1_i1	G134077	G1340771		398	199	4	1.61	100	CDS	396	34.35	-1	serine/threonine protein kinase	COG0515	Bacteria	Aminicenantes
DN37287_c0_g1	460	261	7	2.2	DN37287_c0_g1_i1	G137975	G1379751		460	261	7	2.15	100	CDS	456	71.52	-1	peptidyl-dipeptidase Dcp	KO:K01284	Bacteria	Aminicenantes
DN38717_c0_g1	330	131	7	4.3	DN38717_c0_g1_i1	G127602	G1276021		330	131	7	4.28	100	CDS	255	49.33	-1	lysine 2,3-aminomutase	KO:K01843	Bacteria	Aminicenantes
DN38785_c0_g1	351	152	5	2.6	DN38785_c0_g1_i1	G129954	G1299541		351	152	5	2.63	100	CDS	333	64.42	1	6-phosphofructokinase 1	KO:K00850	Bacteria	Aminicenantes
DN41864_c0_g1	270	72.4	5	5.5	DN41864_c0_g1_i1	G117967	G1179671		270	72.44	5	5.53	100	CDS	270	60	1	peptidyl-dipeptidase Dcp	KO:K01284	Bacteria	Aminicenantes
DN43888_c0_g1	526	327	9	2.2	DN43888_c0_g1_i1	G140774	G1407741		526	327	9	2.2	100	CDS	525	58.96	-1	oligopeptidase B	KO:K01354	Bacteria	Aminicenantes
DN47004_c0_g1	319	120	4	2.7	DN47004_c0_g1_i1	G126165	G1261651		319	120	4	2.67	100	CDS	267	61.36	1	lysine 2,3-aminomutase	KO:K01843	Bacteria	Aminicenantes
DN9849_c1_g1	1033	834	53	5.1	DN9849_c1_g1_i1	G148025	G1480251		1033	834	53	5.09	100	CDS	1029	40.2	-1	serine/threonine-protein kinase	KO:K08884	Bacteria	Aminicenantes
DN33636_c0_g1	469	270	9	2.7	DN33636_c0_g1_i1	G138437	G1384371		469	270	9	2.67	100	CDS	465	58.54	1	cytochrome c peroxidase	KO:K00428	Bacteria	Aquificae	Aquificae	Aquificales	Aquificaceae	Hydrogenivirga
DN23150_c0_g1	226	37.8	7	14.8	DN23150_c0_g1_i1	G107091	G1070911		226	37.8	7	14.83	100	CDS	198	63.08	1	carbon-monoxide dehydrogenase medium subunit	KO:K03519	Bacteria	Aquificae	Aquificae	Aquificales	Aquificaceae	Hydrogenobacter
DN23944_c0_g1	300	101	4	3.2	DN23944_c0_g1_i1	G123368	G1233681		300	101	4	3.17	100	CDS	297	30.21	-1	DNA repair protein RecN (Recombination protein N)	KO:K03631	Bacteria	Aquificae	Aquificae	Aquificales	Hydrogenothermaceae	Persephonella
DN4533_c0_g1	257	64	10	12.5	DN4533_c0_g1_i2	G124504	G1245041	1	307	108	5.63	4.18	33.37	CDS	177	68.29	1	peptidyl-prolyl cis-trans isomerase A (cyclophilin A)/peptidyl-prolyl cis-trans isomerase B (cyclophilin B)	KO:K03767,KO:K03768	Bacteria	Aquificae	Aquificae	Aquificales	Hydrogenothermaceae	Persephonella
DN6869_c0_g1	427	227.6	9	3.2	DN6869_c0_g1_i2	G135777	G1357771	1	422	223	5.47	1.97	62.05	CDS	258	46.75	1	HP	HPrule	Bacteria	Armatimonadetes
DN19438_c0_g1	1012	813	21	2.1	DN19438_c0_g1_i1	G147900	G1479001	1	1012	813	21	2.07	100	CDS	291	#N/A	1	HP	HPrule	Bacteria	Atribacteria
DN19438_c0_g1	1012	813	21	2.1	DN19438_c0_g1_i1	G147900	G1479002	2	1012	813	21	2.07	100	CDS	723	29.51	1	ankyrin repeat protein	COG0666	Bacteria	Atribacteria
DN29843_c0_g1	231	41.2	2	3.9	DN29843_c0_g1_i1	G108496	G1084961		231	41.21	2	3.89	100	CDS	228	67.11	1	HP	HPrule	Bacteria	Atribacteria
DN46759_c0_g1	381	182	5	2.2	DN46759_c0_g1_i1	G132738	G1327381		381	182	5	2.2	100	CDS	378	54	1	HP	KO:K00936	Bacteria	Atribacteria
DN15143_c0_g1	222	35.2	4	9.1	DN15143_c0_g1_i1	G105949	G1059491		222	35.18	4	9.11	100	CDS	195	52.63	1	protein-tyrosine phosphatase	KO:K01104	Bacteria	Bacteroidetes	Bacteroidia	Bacteroidales	Bacteroidaceae	Bacteroides
DN16543_c0_g1	220	33.9	3	7.1	DN16543_c0_g1_i1	G105412	G1054121		220	33.9	3	7.09	100	CDS	219	72.6	-1	uncharacterized ion transporter superfamily protein YfcC	COG1288	Bacteria	Bacteroidetes	Bacteroidia	Bacteroidales	Bacteroidaceae	Bacteroides
DN17380_c0_g1	428	229	4	1.4	DN17380_c0_g1_i1	G136131	G1361311		428	229	4	1.4	100	CDS	408	58.96	-1	16S rRNA (uracil1498-N3)-methyltransferase	KO:K09761	Bacteria	Bacteroidetes	Bacteroidia	Bacteroidales	Bacteroidaceae	Bacteroides
DN18500_c0_g1	228	39.1	10	20.5	DN18500_c0_g1_i1	G107609	G1076091		228	39.14	10	20.46	100	CDS	225	66.67	1	adenylosuccinate lyase	KO:K01756	Bacteria	Bacteroidetes	Bacteroidia	Bacteroidales	Bacteroidaceae	Bacteroides
DN21045_c0_g1	432	233	6565	2256.2	DN21045_c0_g1_i1	G136392	G1363921	1	432	233	6565	2256.22	100	CDS	168	#N/A	1	HP	HPrule	Bacteria	Bacteroidetes	Bacteroidia	Bacteroidales	Bacteroidaceae	Bacteroides
DN21045_c0_g1	432	233	6565	2256.2	DN21045_c0_g1_i1	G136392	G1363922	2	432	233	6565	2256.22	100	CDS	267	66.67	-1	HP	HPrule	Bacteria	Bacteroidetes	Bacteroidia	Bacteroidales	Bacteroidaceae	Bacteroides
DN22047_c0_g1	545	346	15	3.5	DN22047_c0_g1_i1	G141341	G1413411		545	346	15	3.47	100	CDS	543	59.36	1	HP	COG3943	Bacteria	Bacteroidetes	Bacteroidia	Bacteroidales	Bacteroidaceae	Bacteroides
DN22729_c0_g1	243	50	4	6.4	DN22729_c0_g1_i1	G111654	G1116541		243	49.97	4	6.41	100	CDS	240	47.44	1	HP	HPrule	Bacteria	Bacteroidetes	Bacteroidia	Bacteroidales	Bacteroidaceae	Bacteroides
DN25155_c0_g1	1001	802	35	3.5	DN25155_c0_g1_i1	G147833	G1478331		1001	802	35	3.49	100	CDS	999	75.83	-1	translation initiation factor IF-2	KO:K02519	Bacteria	Bacteroidetes	Bacteroidia	Bacteroidales	Bacteroidaceae	Bacteroides
DN25559_c0_g1	589	390	12	2.5	DN25559_c0_g1_i1	G142632	G1426321		589	390	12	2.46	100	CDS	588	40	-1	HP	HPrule	Bacteria	Bacteroidetes	Bacteroidia	Bacteroidales	Bacteroidaceae	Bacteroides
DN25878_c0_g1	237	45.5	4	7	DN25878_c0_g1_i1	G110039	G1100391		237	45.49	4	7.04	100	CDS	237	78.48	1	glutamate dehydrogenase (NADP+)	KO:K00262	Bacteria	Bacteroidetes	Bacteroidia	Bacteroidales	Bacteroidaceae	Bacteroides
DN26416_c0_g1	232	41.9	5	9.6	DN26416_c0_g1_i1	G108725	G1087251		232	41.9	5	9.55	100	CDS	228	77.63	-1	aminomethyltransferase	KO:K00605	Bacteria	Bacteroidetes	Bacteroidia	Bacteroidales	Bacteroidaceae	Bacteroides
DN33259_c0_g1	265	68	6	7.1	DN33259_c0_g1_i1	G116899	G1168991		265	68.02	6	7.06	100	CDS	264	69.32	-1	dipeptidase D	KO:K01270	Bacteria	Bacteroidetes	Bacteroidia	Bacteroidales	Bacteroidaceae	Bacteroides
DN35804_c0_g1	237	45.5	3	5.3	DN35804_c0_g1_i1	G110090	G1100901		237	45.49	3	5.28	100	CDS	165	58.18	1	HP	HPrule	Bacteria	Bacteroidetes	Bacteroidia	Bacteroidales	Bacteroidaceae	Bacteroides
DN37805_c0_g1	607	408	17	3.3	DN37805_c0_g1_i1	G143064	G1430641		607	408	17	3.34	100	CDS	567	86.77	-1	sulfate adenylyltransferase subunit 2	KO:K00957	Bacteria	Bacteroidetes	Bacteroidia	Bacteroidales	Bacteroidaceae	Bacteroides
DN37998_c0_g1	716	517	11	1.7	DN37998_c0_g1_i1	G145113	G1451131		716	517	11	1.7	100	CDS	714	81.09	1	ATPase subunit of ABC transporter with duplicated ATPase domains	COG0488	Bacteria	Bacteroidetes	Bacteroidia	Bacteroidales	Bacteroidaceae	Bacteroides
DN40825_c0_g1	281	82.5	9	8.7	DN40825_c0_g1_i1	G120091	G1200911		281	82.54	9	8.73	100	CDS	279	59.14	1	putative Holliday junction resolvase	KO:K07447	Bacteria	Bacteroidetes	Bacteroidia	Bacteroidales	Bacteroidaceae	Bacteroides
DN44152_c0_g1	228	39.1	5	10.2	DN44152_c0_g1_i1	G107766	G1077661		228	39.14	5	10.23	100	CDS	228	48	1	ATP-binding cassette subfamily F protein 3	KO:K06158	Bacteria	Bacteroidetes	Bacteroidia	Bacteroidales	Bacteroidaceae	Bacteroides
DN45412_c0_g1	225	37.1	5	10.8	DN45412_c0_g1_i1	G106942	G1069421		225	37.13	5	10.78	100	CDS	150	44.68	-1	uncharacterized protein DUF721	pfam05258	Bacteria	Bacteroidetes	Bacteroidia	Bacteroidales	Bacteroidaceae	Bacteroides
DN45958_c0_g1	286	87.3	5	4.6	DN45958_c0_g1_i1	G121052	G1210521		286	87.28	5	4.59	100	CDS	282	52.69	1	membrane fusion protein (multidrug efflux system)	KO:K03585	Bacteria	Bacteroidetes	Bacteroidia	Bacteroidales	Bacteroidaceae	Bacteroides
DN47316_c0_g1	212	29.1	4	11	DN47316_c0_g1_i1	G103302	G1033021		212	29.05	4	11.03	100	CDS	210	54.05	1	HP	HPrule	Bacteria	Bacteroidetes	Bacteroidia	Bacteroidales	Bacteroidaceae	Bacteroides
DN48955_c0_g1	243	50	5	8	DN48955_c0_g1_i1	G111790	G1117901		243	49.97	5	8.01	100	CDS	156	56.1	-1	uncharacterized protein DUF4842	pfam16130	Bacteria	Bacteroidetes	Bacteroidia	Bacteroidales	Bacteroidaceae	Bacteroides
DN49553_c0_g1	292	93.1	6	5.2	DN49553_c0_g1_i1	G122120	G1221201		292	93.08	6	5.16	100	CDS	291	56.98	1	HP	HPrule	Bacteria	Bacteroidetes	Bacteroidia	Bacteroidales	Bacteroidaceae	Bacteroides
DN5018_c0_g1	552	353	22	5	DN5018_c0_g1_i1	G141585	G1415851		552	353	22	4.99	100	CDS	549	39.84	1	HP	HPrule	Bacteria	Bacteroidetes	Bacteroidia	Bacteroidales	Bacteroidaceae	Bacteroides
DN17301_c0_g1	220	33.9	3	7.1	DN17301_c0_g1_i1	G105416	G1054161		220	33.9	3	7.09	100	CDS	219	61.97	1	transcription elongation factor GreB	KO:K04760	Bacteria	Bacteroidetes	Bacteroidia	Bacteroidales	Balneicellaceae	Balneicella
DN24253_c0_g1	874	675	46	5.5	DN24253_c0_g1_i1	G146920	G1469201		874	675	46	5.46	100	CDS	684	76.32	-1	2-oxoisovalerate dehydrogenase E1 component	KO:K11381	Bacteria	Bacteroidetes	Bacteroidia	Bacteroidales	Balneicellaceae	Balneicella
DN27118_c0_g1	246	52.3	3	4.6	DN27118_c0_g1_i1	G112483	G1124831		246	52.29	3	4.59	100	CDS	228	77.63	1	2,3-bisphosphoglycerate-dependent phosphoglycerate mutase	KO:K01834	Bacteria	Bacteroidetes	Bacteroidia	Bacteroidales	Balneicellaceae	Balneicella
DN36262_c0_g1	271	73.3	4	4.4	DN36262_c0_g1_i1	G118146	G1181461		271	73.34	4	4.37	100	CDS	270	61.36	-1	HP	HPrule	Bacteria	Bacteroidetes	Bacteroidia	Bacteroidales	Balneicellaceae	Balneicella
DN43217_c0_g1	273	75.2	5	5.3	DN43217_c0_g1_i1	G118543	G1185431		273	75.15	5	5.33	100	CDS	270	66.67	1	N6-L-threonylcarbamoyladenine synthase	KO:K01409	Bacteria	Bacteroidetes	Bacteroidia	Bacteroidales	Balneicellaceae	Balneicella
DN46074_c0_g1	209	27.3	3	8.8	DN46074_c0_g1_i1	G102460	G1024601		209	27.33	3	8.79	100	CDS	207	65.67	1	outer membrane receptor for ferrienterochelin and colicins	KO:K16089	Bacteria	Bacteroidetes	Bacteroidia	Bacteroidales	Balneicellaceae	Balneicella
DN19150_c0_g1	290	91.1	10	8.8	DN19150_c0_g1_i1	G121652	G1216521		290	91.14	10	8.79	100	CDS	288	84.04	-1	L-serine dehydratase	KO:K01752	Bacteria	Bacteroidetes	Bacteroidia	Bacteroidales	Dysgonamonadaceae	Dysgonomonas
DN20046_c0_g1	221	34.5	4	9.3	DN20046_c0_g1_i1	G105686	G1056861		221	34.54	4	9.27	100	CDS	219	61.64	1	primosomal protein N' (replication factor Y)	KO:K04066	Bacteria	Bacteroidetes	Bacteroidia	Bacteroidales	Dysgonamonadaceae	Dysgonomonas
DN29123_c0_g1	226	37.8	2	4.2	DN29123_c0_g1_i1	G107117	G1071171		226	37.8	2	4.24	100	CDS	225	53.42	-1	uncharacterized protein DUF1858	pfam08984	Bacteria	Bacteroidetes	Bacteroidia	Bacteroidales	Dysgonamonadaceae	Dysgonomonas
DN31132_c0_g1	442	243	5	1.7	DN31132_c0_g1_i1	G137001	G1370011		442	243	5	1.65	100	CDS	396	68.46	-1	HP	HPrule	Bacteria	Bacteroidetes	Bacteroidia	Bacteroidales	Dysgonamonadaceae	Dysgonomonas
DN32313_c0_g1	374	175	9	4.1	DN32313_c0_g1_i1	G132111	G1321111		374	175	9	4.12	100	CDS	372	32.31	1	YidC/Oxa1 family membrane protein insertase	KO:K03217	Bacteria	Bacteroidetes	Bacteroidia	Bacteroidales	Dysgonamonadaceae	Dysgonomonas
DN36044_c0_g1	285	86.3	9	8.4	DN36044_c0_g1_i1	G120844	G1208441		285	86.32	9	8.35	100	CDS	282	46.43	1	ligand-binding sensor domain-containing protein	COG3292	Bacteria	Bacteroidetes	Bacteroidia	Bacteroidales	Dysgonamonadaceae	Dysgonomonas
DN40003_c0_g1	417	218	11	4	DN40003_c0_g1_i1	G135428	G1354281		417	218	11	4.04	100	CDS	387	84.03	-1	peptide methionine sulfoxide reductase msrA/msrB	KO:K12267	Bacteria	Bacteroidetes	Bacteroidia	Bacteroidales	Dysgonamonadaceae	Dysgonomonas
DN40614_c0_g1	214	30.2	2	5.3	DN40614_c0_g1_i1	G103841	G1038411		214	30.23	2	5.3	100	CDS	213	60.29	-1	HP	HPrule	Bacteria	Bacteroidetes	Bacteroidia	Bacteroidales	Dysgonamonadaceae	Dysgonomonas
DN43110_c0_g1	233	42.6	4	7.5	DN43110_c0_g1_i1	G109053	G1090531		233	42.61	4	7.52	100	CDS	231	54.67	1	XTP/dITP diphosphohydrolase	KO:K02428	Bacteria	Bacteroidetes	Bacteroidia	Bacteroidales	Dysgonamonadaceae	Dysgonomonas
DN44247_c0_g1	331	132	6	3.6	DN44247_c0_g1_i1	G127748	G1277481		331	132	6	3.64	100	CDS	330	77.27	-1	dipeptidyl aminopeptidase/acylaminoacyl peptidase	COG1506	Bacteria	Bacteroidetes	Bacteroidia	Bacteroidales	Dysgonamonadaceae	Dysgonomonas
DN47200_c0_g1	320	121	13	8.6	DN47200_c0_g1_i1	G126286	G1262861		320	121	13	8.6	100	CDS	297	79.12	1	phosphoglycerate kinase	KO:K00927	Bacteria	Bacteroidetes	Bacteroidia	Bacteroidales	Dysgonamonadaceae	Dysgonomonas
DN47994_c0_g1	217	32	5	12.5	DN47994_c0_g1_i1	G104706	G1047061		217	32.04	5	12.5	100	CDS	213	78.87	-1	HP	HPrule	Bacteria	Bacteroidetes	Bacteroidia	Bacteroidales	Dysgonamonadaceae	Dysgonomonas
DN30884_c0_g1	254	58.7	18	24.6	DN30884_c0_g1_i1	G114443	G1144431		254	58.7	18	24.56	100	CDS	147	91.67	1	large subunit ribosomal protein L34	KO:K02914	Bacteria	Bacteroidetes	Bacteroidia	Bacteroidales	Dysgonamonadaceae	Proteiniphilum
DN44213_c0_g1	737	538	23	3.4	DN44213_c0_g1_i1	G145434	G1454342	2	737	538	23	3.42	100	CDS	534	60.92	-1	HP	HPrule	Bacteria	Bacteroidetes	Bacteroidia	Bacteroidales	Lentimicrobiaceae
DN16318_c0_g1	647	448	18	3.2	DN16318_c0_g1_i1	G143922	G1439221		647	448	18	3.22	100	CDS	366	42.68	1	heat shock protein HslJ	COG3187	Bacteria	Bacteroidetes	Bacteroidia	Bacteroidales	Odoribacteraceae	Butyricimonas
DN19523_c0_g1	511	312	11	2.8	DN19523_c0_g1_i1	G140232	G1402321		511	312	11	2.82	100	CDS	507	66.27	-1	dipeptidase D	KO:K01270	Bacteria	Bacteroidetes	Bacteroidia	Bacteroidales	Odoribacteraceae	Butyricimonas
DN24292_c0_g1	240	47.7	5	8.4	DN24292_c0_g1_i1	G110829	G1108291		240	47.71	5	8.39	100	CDS	240	37.33	-1	HP	HPrule	Bacteria	Bacteroidetes	Bacteroidia	Bacteroidales	Odoribacteraceae	Butyricimonas
DN26059_c0_g1	386	187	4	1.7	DN26059_c0_g1_i1	G133149	G1331491		386	187	4	1.71	100	CDS	384	50	1	aspartate/methionine/tyrosine aminotransferase	COG0436	Bacteria	Bacteroidetes	Bacteroidia	Bacteroidales	Odoribacteraceae	Butyricimonas
DN30583_c0_g1	315	116	8	5.5	DN30583_c0_g1_i1	G125609	G1256091		315	116	8	5.52	100	CDS	315	44.9	-1	oxygen tolerance protein BatD	pfam13584	Bacteria	Bacteroidetes	Bacteroidia	Bacteroidales	Odoribacteraceae	Butyricimonas
DN33773_c0_g1	326	127	5	3.2	DN33773_c0_g1_i1	G127035	G1270351		326	127	5	3.15	100	CDS	324	83.02	1	signal recognition particle subunit SRP54	KO:K03106	Bacteria	Bacteroidetes	Bacteroidia	Bacteroidales	Odoribacteraceae	Butyricimonas
DN34052_c0_g1	396	197	8	3.3	DN34052_c0_g1_i1	G133930	G1339301	1	396	197	8	3.25	100	CDS	312	34.69	-1	HP	HPrule	Bacteria	Bacteroidetes	Bacteroidia	Bacteroidales	Odoribacteraceae	Butyricimonas
DN34052_c0_g1	396	197	8	3.3	DN34052_c0_g1_i1	G133930	G1339302	2	396	197	8	3.25	100	CDS	78	#N/A	-1	HP	HPrule	Bacteria	Bacteroidetes	Bacteroidia	Bacteroidales	Odoribacteraceae	Butyricimonas
DN36251_c0_g1	362	163	7	3.4	DN36251_c0_g1_i1	G131020	G1310201		362	163	7	3.44	100	CDS	360	60.68	1	IgA peptidase M64	pfam09471	Bacteria	Bacteroidetes	Bacteroidia	Bacteroidales	Odoribacteraceae	Butyricimonas
DN3884_c0_g1	335	136	5	2.9	DN3884_c0_g1_i1	G128218	G1282181		335	136	5	2.94	100	CDS	333	68.47	1	glutaminyl-tRNA synthetase	KO:K01886	Bacteria	Bacteroidetes	Bacteroidia	Bacteroidales	Odoribacteraceae	Butyricimonas
DN41773_c0_g1	338	139	5	2.9	DN41773_c0_g1_i1	G128567	G1285671		338	139	5	2.88	100	CDS	336	46.6	-1	membrane-bound ClpP family serine protease	COG1030	Bacteria	Bacteroidetes	Bacteroidia	Bacteroidales	Odoribacteraceae	Butyricimonas
DN43870_c0_g1	434	235	7	2.4	DN43870_c0_g1_i1	G136545	G1365451		434	235	7	2.39	100	CDS	426	70.15	1	leucyl-tRNA synthetase	KO:K01869	Bacteria	Bacteroidetes	Bacteroidia	Bacteroidales	Odoribacteraceae	Butyricimonas
DN48312_c0_g1	500	301	10	2.7	DN48312_c0_g1_i1	G139805	G1398051		500	301	10	2.66	100	CDS	498	47.1	1	predicted short-subunit dehydrogenase-like oxidoreductase (DUF2520 family)	COG5495	Bacteria	Bacteroidetes	Bacteroidia	Bacteroidales	Odoribacteraceae	Butyricimonas
DN12223_c0_g1	347	148	9	4.9	DN12223_c0_g1_i1	G129489	G1294891		347	148	9	4.87	100	CDS	345	62.83	1	ribose 5-phosphate isomerase B	KO:K01808	Bacteria	Bacteroidetes	Bacteroidia	Bacteroidales	Odoribacteraceae	Odoribacter
DN16847_c0_g1	249	54.7	3	4.4	DN16847_c0_g1_i1	G113210	G1132101		249	54.65	3	4.4	100	CDS	246	65.43	-1	alpha-amylase	KO:K07405	Bacteria	Bacteroidetes	Bacteroidia	Bacteroidales	Odoribacteraceae	Odoribacter
DN20501_c0_g1	213	29.6	4	10.8	DN20501_c0_g1_i1	G103432	G1034321		213	29.64	4	10.81	100	CDS	213	88.73	-1	acetyl-CoA carboxylase carboxyltransferase component	COG4799	Bacteria	Bacteroidetes	Bacteroidia	Bacteroidales	Odoribacteraceae	Odoribacter
DN21939_c0_g1	242	49.2	4	6.5	DN21939_c0_g1_i1	G111352	G1113521		242	49.21	4	6.51	100	CDS	240	43.59	-1	phospholipid/cholesterol/gamma-HCH transport system substrate-binding protein	KO:K02067	Bacteria	Bacteroidetes	Bacteroidia	Bacteroidales	Odoribacteraceae	Odoribacter
DN25059_c0_g1	225	37.1	3	6.5	DN25059_c0_g1_i1	G106829	G1068291		225	37.13	3	6.47	100	CDS	150	89.8	-1	GTP-binding protein HflX	KO:K03665	Bacteria	Bacteroidetes	Bacteroidia	Bacteroidales	Odoribacteraceae	Odoribacter
DN27578_c0_g1	382	183	10	4.4	DN27578_c0_g1_i1	G132797	G1327971		382	183	10	4.38	100	CDS	378	55.56	-1	peptidyl-dipeptidase Dcp	KO:K01284	Bacteria	Bacteroidetes	Bacteroidia	Bacteroidales	Odoribacteraceae	Odoribacter
DN33022_c0_g1	584	385	12	2.5	DN33022_c0_g1_i1	G142495	G1424951	1	584	385	12	2.5	100	CDS	342	46	1	pyruvate carboxylase	KO:K01958	Bacteria	Bacteroidetes	Bacteroidia	Bacteroidales	Odoribacteraceae	Odoribacter
DN33022_c0_g1	584	385	12	2.5	DN33022_c0_g1_i1	G142495	G1424952	2	584	385	12	2.5	100	CDS	168	#N/A	-1	HP	HPrule	Bacteria	Bacteroidetes	Bacteroidia	Bacteroidales	Odoribacteraceae	Odoribacter
DN37732_c0_g1	248	53.9	4	6	DN37732_c0_g1_i1	G113057	G1130571		248	53.86	4	5.95	100	CDS	129	60	1	HP	KO:K07027	Bacteria	Bacteroidetes	Bacteroidia	Bacteroidales	Odoribacteraceae	Odoribacter
DN41420_c0_g1	307	108	9	6.7	DN41420_c0_g1_i1	G124495	G1244951		307	108	9	6.67	100	CDS	303	69.31	1	GTP-binding protein Era	KO:K03595	Bacteria	Bacteroidetes	Bacteroidia	Bacteroidales	Odoribacteraceae	Odoribacter
DN47393_c0_g1	594	395	10	2	DN47393_c0_g1_i1	G142777	G1427771		594	395	10	2.03	100	CDS	480	85.81	1	3-keto-5-aminohexanoate cleavage enzyme	KO:K18013	Bacteria	Bacteroidetes	Bacteroidia	Bacteroidales	Odoribacteraceae	Odoribacter
DN23272_c0_g1	237	45.5	4	7	DN23272_c0_g1_i1	G110025	G1100251		237	45.49	4	7.04	100	CDS	234	40.26	-1	uncharacterized protein DUF349	pfam03993	Bacteria	Bacteroidetes	Bacteroidia	Bacteroidales	Paludibacteraceae	Paludibacter
DN23996_c0_g1	575	376	13	2.8	DN23996_c0_g1_i1	G142254	G1422541	1	575	376	13	2.77	100	CDS	204	#N/A	1	HP	HPrule	Bacteria	Bacteroidetes	Bacteroidia	Bacteroidales	Paludibacteraceae	Paludibacter
DN23996_c0_g1	575	376	13	2.8	DN23996_c0_g1_i1	G142254	G1422542	2	575	376	13	2.77	100	CDS	372	25.41	1	uncharacterized protein DUF3308	pfam11751	Bacteria	Bacteroidetes	Bacteroidia	Bacteroidales	Paludibacteraceae	Paludibacter
DN37667_c0_g1	251	56.3	5	7.1	DN37667_c0_g1_i1	G113823	G1138231		251	56.26	5	7.12	100	CDS	249	59.76	1	sugar/nucleoside kinase (ribokinase family)	COG0524	Bacteria	Bacteroidetes	Bacteroidia	Bacteroidales	Paludibacteraceae	Paludibacter
DN20127_c0_g1	217	32	3	7.5	DN20127_c0_g1_i1	G104567	G1045671		217	32.04	3	7.5	100	CDS	216	71.83	1	topoisomerase-4 subunit A	KO:K02621	Bacteria	Bacteroidetes	Bacteroidia	Bacteroidales	Porphyromonadaceae	Fermentimonas
DN3677_c0_g1	391	192	8	3.3	DN3677_c0_g1_i1	G133549	G1335491		391	192	8	3.34	100	CDS	369	51.52	1	HP	HPrule	Bacteria	Bacteroidetes	Bacteroidia	Bacteroidales	Porphyromonadaceae	Fermentimonas
DN39623_c0_g1	219	33.3	4	9.6	DN39623_c0_g1_i1	G105246	G1052461		219	33.27	4	9.63	100	CDS	216	66.2	-1	peptidyl-dipeptidase Dcp	KO:K01284	Bacteria	Bacteroidetes	Bacteroidia	Bacteroidales	Porphyromonadaceae	Fermentimonas
DN49630_c0_g1	337	138	5	2.9	DN49630_c0_g1_i1	G128477	G1284771		337	138	5	2.9	100	CDS	303	67.68	1	magnesium transporter	KO:K06213	Bacteria	Bacteroidetes	Bacteroidia	Bacteroidales	Porphyromonadaceae	Fermentimonas
DN38790_c0_g1	229	39.8	5	10.1	DN38790_c0_g1_i1	G107987	G1079871		229	39.82	5	10.05	100	CDS	228	66.67	-1	4-hydroxythreonine-4-phosphate dehydrogenase	KO:K00097	Bacteria	Bacteroidetes	Bacteroidia	Bacteroidales	Porphyromonadaceae	Petrimonas
DN17894_c0_g1	284	85.4	6	5.6	DN17894_c0_g1_i1	G120590	G1205901		284	85.37	6	5.63	100	CDS	282	53.93	-1	uncharacterized protein DUF4301	pfam14134	Bacteria	Bacteroidetes	Bacteroidia	Bacteroidales	Porphyromonadaceae	Porphyromonas
DN19113_c0_g1	511	312	11	2.8	DN19113_c0_g1_i1	G140231	G1402311	1	511	312	11	2.82	100	CDS	375	85.12	1	3-aminobutyryl-CoA ammonia-lyase	KO:K18014	Bacteria	Bacteroidetes	Bacteroidia	Bacteroidales	Porphyromonadaceae	Porphyromonas
DN19113_c0_g1	511	312	11	2.8	DN19113_c0_g1_i1	G140231	G1402312	2	511	312	11	2.82	100	CDS	81	92.59	1	3-keto-5-aminohexanoate cleavage enzyme	KO:K18013	Bacteria	Bacteroidetes	Bacteroidia	Bacteroidales	Porphyromonadaceae	Porphyromonas
DN19241_c0_g1	277	78.8	3	3.1	DN19241_c0_g1_i1	G119216	G1192161		277	78.81	3	3.05	100	CDS	276	53.33	-1	HP	HPrule	Bacteria	Bacteroidetes	Bacteroidia	Bacteroidales	Porphyromonadaceae	Porphyromonas
DN25652_c0_g1	507	308	6	1.6	DN25652_c0_g1_i1	G140069	G1400691		507	308	6	1.56	100	CDS	504	68.67	1	ribulose-phosphate 3-epimerase	KO:K01783	Bacteria	Bacteroidetes	Bacteroidia	Bacteroidales	Porphyromonadaceae	Porphyromonas
DN28195_c0_g1	395	196	7	2.9	DN28195_c0_g1_i1	G133847	G1338471		395	196	7	2.86	100	CDS	393	90.84	1	L-erythro-3,5-diaminohexanoate dehydrogenase	KO:K18012	Bacteria	Bacteroidetes	Bacteroidia	Bacteroidales	Porphyromonadaceae	Porphyromonas
DN29531_c0_g1	218	32.7	4	9.8	DN29531_c0_g1_i1	G104899	G1048991		218	32.65	4	9.81	100	CDS	216	76.39	-1	acylaminoacyl-peptidase	KO:K01303	Bacteria	Bacteroidetes	Bacteroidia	Bacteroidales	Porphyromonadaceae	Porphyromonas
DN30062_c0_g1	244	50.7	3	4.7	DN30062_c0_g1_i1	G111957	G1119571		244	50.74	3	4.73	100	CDS	240	67.5	-1	phosphoglucomutase	KO:K01835	Bacteria	Bacteroidetes	Bacteroidia	Bacteroidales	Porphyromonadaceae	Porphyromonas
DN32274_c0_g1	306	107	8	6	DN32274_c0_g1_i1	G124338	G1243381	1	306	107	8	5.99	100	CDS	201	#N/A	-1	HP	HPrule	Bacteria	Bacteroidetes	Bacteroidia	Bacteroidales	Porphyromonadaceae	Porphyromonas
DN32274_c0_g1	306	107	8	6	DN32274_c0_g1_i1	G124338	G1243382	2	306	107	8	5.99	100	CDS	162	76.92	-1	seryl-tRNA synthetase	KO:K01875	Bacteria	Bacteroidetes	Bacteroidia	Bacteroidales	Porphyromonadaceae	Porphyromonas
DN38849_c0_g1	457	258	13	4	DN38849_c0_g1_i1	G137809	G1378091		457	258	13	4.03	100	CDS	453	77.48	1	cysteinyl-tRNA synthetase	KO:K01883	Bacteria	Bacteroidetes	Bacteroidia	Bacteroidales	Porphyromonadaceae	Porphyromonas
DN40800_c0_g1	349	150	8	4.3	DN40800_c0_g1_i1	G129726	G1297261		349	150	8	4.27	100	CDS	348	45.69	-1	HP	HPrule	Bacteria	Bacteroidetes	Bacteroidia	Bacteroidales	Porphyromonadaceae	Porphyromonas
DN40878_c0_g1	395	196	8	3.3	DN40878_c0_g1_i1	G133870	G1338701		395	196	8	3.27	100	CDS	393	78.63	-1	lysine 2,3-aminomutase	KO:K01843	Bacteria	Bacteroidetes	Bacteroidia	Bacteroidales	Porphyromonadaceae	Porphyromonas
DN42057_c0_g1	226	37.8	3	6.4	DN42057_c0_g1_i1	G107181	G1071811		226	37.8	3	6.36	100	CDS	225	84.51	1	putative ABC transport system ATP-binding protein	KO:K02003	Bacteria	Bacteroidetes	Bacteroidia	Bacteroidales	Porphyromonadaceae	Porphyromonas
DN44341_c0_g1	236	44.8	4	7.2	DN44341_c0_g1_i1	G109885	G1098851		236	44.76	4	7.16	100	CDS	234	61.04	-1	HP	HPrule	Bacteria	Bacteroidetes	Bacteroidia	Bacteroidales	Porphyromonadaceae	Porphyromonas
DN45679_c0_g1	290	91.1	5	4.4	DN45679_c0_g1_i1	G121743	G1217431		290	91.14	5	4.39	100	CDS	288	65.06	-1	quercetin dioxygenase-like cupin family protein	COG1917	Bacteria	Bacteroidetes	Bacteroidia	Bacteroidales	Porphyromonadaceae	Porphyromonas
DN20962_c0_g1	411	212	8	3	DN20962_c0_g1_i1	G134994	G1349941		411	212	8	3.02	100	CDS	408	65.44	-1	exodeoxyribonuclease-3	KO:K01142	Bacteria	Bacteroidetes	Bacteroidia	Bacteroidales	Porphyromonadaceae	Sanguibacteroides
DN23058_c0_g1	208	26.8	11	32.9	DN23058_c0_g1_i1	G102044	G1020441		208	26.77	11	32.9	100	CDS	207	86.67	-1	prolyl-tRNA synthetase	KO:K01881	Bacteria	Bacteroidetes	Bacteroidia	Bacteroidales	Porphyromonadaceae	Sanguibacteroides
DN42643_c0_g1	261	64.6	3	3.7	DN42643_c0_g1_i1	G116064	G1160641		261	64.57	3	3.72	100	CDS	261	68.97	-1	HP	KO:K07003	Bacteria	Bacteroidetes	Bacteroidia	Bacteroidales	Porphyromonadaceae	Sanguibacteroides
DN14246_c0_g1	382	183	9	3.9	DN14246_c0_g1_i1	G132767	G1327671		382	183	9	3.94	100	CDS	378	48.41	-1	glucose-6-phosphate isomerase	KO:K01810	Bacteria	Bacteroidetes	Bacteroidia	Bacteroidales	Porphyromonadaceae
DN15323_c0_g1	211	28.5	3	8.4	DN15323_c0_g1_i1	G102852	G1028521		211	28.47	3	8.44	100	CDS	210	84.29	1	alanyl-tRNA synthetase	KO:K01872	Bacteria	Bacteroidetes	Bacteroidia	Bacteroidales	Porphyromonadaceae
DN18956_c0_g1	223	35.8	4	8.9	DN18956_c0_g1_i1	G106258	G1062581		223	35.82	4	8.94	100	CDS	222	68.49	1	methionyl-tRNA synthetase	KO:K01874	Bacteria	Bacteroidetes	Bacteroidia	Bacteroidales	Porphyromonadaceae
DN28419_c0_g1	256	60.4	4	5.3	DN28419_c0_g1_i1	G114893	G1148931		256	60.35	4	5.31	100	CDS	252	63.89	-1	peptidyl-dipeptidase Dcp	KO:K01284	Bacteria	Bacteroidetes	Bacteroidia	Bacteroidales	Porphyromonadaceae
DN33182_c0_g1	499	300	9	2.4	DN33182_c0_g1_i1	G139742	G1397421		499	300	9	2.4	100	CDS	498	57.14	1	dihydrofolate synthase/folylpolyglutamate synthase	KO:K11754	Bacteria	Bacteroidetes	Bacteroidia	Bacteroidales	Porphyromonadaceae
DN37893_c0_g1	368	169	5	2.4	DN37893_c0_g1_i1	G131584	G1315841		368	169	5	2.37	100	CDS	366	66.39	-1	iron complex outermembrane receptor protein	KO:K02014	Bacteria	Bacteroidetes	Bacteroidia	Bacteroidales	Porphyromonadaceae
DN42624_c0_g1	267	69.8	6	6.9	DN42624_c0_g1_i1	G117361	G1173611		267	69.78	6	6.89	100	CDS	264	77.27	1	dipeptidyl aminopeptidase/acylaminoacyl peptidase	COG1506	Bacteria	Bacteroidetes	Bacteroidia	Bacteroidales	Porphyromonadaceae
DN45914_c0_g1	561	362	17	3.8	DN45914_c0_g1_i1	G141840	G1418401		561	362	17	3.76	100	CDS	444	74.83	-1	2,3-bisphosphoglycerate-dependent phosphoglycerate mutase	KO:K01834	Bacteria	Bacteroidetes	Bacteroidia	Bacteroidales	Porphyromonadaceae
DN49606_c0_g1	491	292	17	4.7	DN49606_c0_g1_i1	G139428	G1394281		491	292	17	4.66	100	CDS	396	60.63	1	23S rRNA-intervening sequence protein	pfam05635	Bacteria	Bacteroidetes	Bacteroidia	Bacteroidales	Porphyromonadaceae
DN5222_c0_g1	458	259.3	17	5.3	DN5222_c0_g1_i1	G135551	G1355511	1	419	220	8.81	3.21	61.08	CDS	417	35.2	-1	ketosteroid isomerase-like protein	COG4319	Bacteria	Bacteroidetes	Bacteroidia	Bacteroidales	Porphyromonadaceae
DN14182_c0_g1	479	280	9	2.6	DN14182_c0_g1_i1	G138892	G1388921		479	280	9	2.57	100	CDS	477	62.66	-1	glycosidase	COG0366	Bacteria	Bacteroidetes	Bacteroidia	Bacteroidales	Prevotellaceae	Prevotella
DN14568_c0_g1	220	33.9	2	4.7	DN14568_c0_g1_i1	G105399	G1053991		220	33.9	2	4.72	100	CDS	219	75.34	-1	phosphoribosylformylglycinamidine synthase	KO:K01952	Bacteria	Bacteroidetes	Bacteroidia	Bacteroidales	Prevotellaceae	Prevotella
DN17474_c0_g1	510	311	11	2.8	DN17474_c0_g1_i1	G140184	G1401841	1	510	311	11	2.83	100	CDS	78	#N/A	1	HP	HPrule	Bacteria	Bacteroidetes	Bacteroidia	Bacteroidales	Prevotellaceae	Prevotella
DN17474_c0_g1	510	311	11	2.8	DN17474_c0_g1_i1	G140184	G1401842	2	510	311	11	2.83	100	CDS	444	37.59	1	HP	HPrule	Bacteria	Bacteroidetes	Bacteroidia	Bacteroidales	Prevotellaceae	Prevotella
DN17996_c0_g1	761	562	56	8	DN17996_c0_g1_i1	G145729	G1457291		761	562	56	7.98	100	CDS	759	37.96	-1	HP	HPrule	Bacteria	Bacteroidetes	Bacteroidia	Bacteroidales	Prevotellaceae	Prevotella
DN21468_c0_g1	257	61.2	4	5.2	DN21468_c0_g1_i1	G115083	G1150831		257	61.18	4	5.24	100	CDS	255	32.91	1	HP	HPrule	Bacteria	Bacteroidetes	Bacteroidia	Bacteroidales	Prevotellaceae	Prevotella
DN22933_c0_g1	231	41.2	2	3.9	DN22933_c0_g1_i1	G108450	G1084501		231	41.21	2	3.89	100	CDS	228	86.84	-1	adenine-specific methyltransferase EcoRI-like protein	pfam13651	Bacteria	Bacteroidetes	Bacteroidia	Bacteroidales	Prevotellaceae	Prevotella
DN26986_c0_g1	214	30.2	7	18.5	DN26986_c0_g1_i1	G103754	G1037541		214	30.23	7	18.54	100	CDS	213	60.87	1	outer membrane receptor for ferrienterochelin and colicins	KO:K16089	Bacteria	Bacteroidetes	Bacteroidia	Bacteroidales	Prevotellaceae	Prevotella
DN29517_c0_g1	286	87.3	5	4.6	DN29517_c0_g1_i1	G120988	G1209881		286	87.28	5	4.59	100	CDS	282	67.9	1	phospholipid/cholesterol/gamma-HCH transport system ATP-binding protein	KO:K02065	Bacteria	Bacteroidetes	Bacteroidia	Bacteroidales	Prevotellaceae	Prevotella
DN30920_c0_g1	557	358	8	1.8	DN30920_c0_g1_i1	G141722	G1417221		557	358	8	1.79	100	CDS	555	48.86	-1	3-phosphoshikimate 1-carboxyvinyltransferase	KO:K00800	Bacteria	Bacteroidetes	Bacteroidia	Bacteroidales	Prevotellaceae	Prevotella
DN31432_c0_g1	412	213	21	7.9	DN31432_c0_g1_i1	G135078	G1350781		412	213	21	7.89	100	CDS	387	53.12	-1	hypoxanthine phosphoribosyltransferase	KO:K00760	Bacteria	Bacteroidetes	Bacteroidia	Bacteroidales	Prevotellaceae	Prevotella
DN33874_c0_g1	247	53.1	3	4.5	DN33874_c0_g1_i1	G112774	G1127741		247	53.07	3	4.53	100	CDS	171	59.62	-1	WbqC-like protein	pfam08889	Bacteria	Bacteroidetes	Bacteroidia	Bacteroidales	Prevotellaceae	Prevotella
DN34674_c0_g1	295	96	4	3.3	DN34674_c0_g1_i1	G122599	G1225991		295	96.03	4	3.34	100	CDS	291	76.47	-1	uncharacterized oligopeptide transporter (OPT) family protein	COG1297	Bacteria	Bacteroidetes	Bacteroidia	Bacteroidales	Prevotellaceae	Prevotella
DN35171_c0_g1	438	239	7	2.4	DN35171_c0_g1_i1	G136795	G1367951		438	239	7	2.35	100	CDS	420	36.69	-1	HP	HPrule	Bacteria	Bacteroidetes	Bacteroidia	Bacteroidales	Prevotellaceae	Prevotella
DN37247_c0_g1	225	37.1	4	8.6	DN37247_c0_g1_i1	G106897	G1068971		225	37.13	4	8.63	100	CDS	222	47.69	-1	imidazolonepropionase	KO:K01468	Bacteria	Bacteroidetes	Bacteroidia	Bacteroidales	Prevotellaceae	Prevotella
DN44053_c0_g1	512	313	12	3.1	DN44053_c0_g1_i1	G140288	G1402881		512	313	12	3.07	100	CDS	510	33.74	-1	long-subunit fatty acid transport protein	COG2067	Bacteria	Bacteroidetes	Bacteroidia	Bacteroidales	Prevotellaceae	Prevotella
DN45599_c0_g1	357	158	6	3	DN45599_c0_g1_i1	G130556	G1305561		357	158	6	3.04	100	CDS	321	47	-1	3-phosphoshikimate 1-carboxyvinyltransferase	KO:K00800	Bacteria	Bacteroidetes	Bacteroidia	Bacteroidales	Prevotellaceae	Prevotella
DN48870_c0_g1	344	145	8	4.4	DN48870_c0_g1_i1	G129279	G1292791		344	145	8	4.42	100	CDS	147	74.47	1	HP	HPrule	Bacteria	Bacteroidetes	Bacteroidia	Bacteroidales	Prevotellaceae	Prevotella
DN16372_c0_g1	694	495	23	3.7	DN16372_c0_g1_i1	G144766	G1447661	1	694	495	23	3.72	100	CDS	90	#N/A	1	HP	HPrule	Bacteria	Bacteroidetes	Bacteroidia	Bacteroidales	Prolixibacteraceae	Prolixibacter
DN16372_c0_g1	694	495	23	3.7	DN16372_c0_g1_i1	G144766	G1447662	2	694	495	23	3.72	100	CDS	417	64.71	-1	putative redox protein	KO:K07397	Bacteria	Bacteroidetes	Bacteroidia	Bacteroidales	Prolixibacteraceae	Prolixibacter
DN16372_c0_g1	694	495	23	3.7	DN16372_c0_g1_i1	G144766	G1447663	3	694	495	23	3.72	100	CDS	159	#N/A	-1	HP	HPrule	Bacteria	Bacteroidetes	Bacteroidia	Bacteroidales	Prolixibacteraceae	Prolixibacter
DN16693_c0_g1	299	100	3	2.4	DN16693_c0_g1_i1	G123173	G1231731		299	100	3	2.4	100	CDS	297	60.61	1	oxygen-independent coproporphyrinogen-3 oxidase	KO:K02495	Bacteria	Bacteroidetes	Bacteroidia	Bacteroidales	Prolixibacteraceae	Prolixibacter
DN20171_c0_g1	369	170	10	4.7	DN20171_c0_g1_i1	G131650	G1316501		369	170	10	4.71	100	CDS	366	67.5	-1	2-polyprenyl-3-methyl-5-hydroxy-6-metoxy-1,4-benzoquinol methylase	COG2227	Bacteria	Bacteroidetes	Bacteroidia	Bacteroidales	Prolixibacteraceae	Prolixibacter
DN2128_c0_g1	500	301	7	1.9	DN2128_c0_g1_i1	G139780	G1397801		500	301	7	1.86	100	CDS	498	44.44	1	HP	HPrule	Bacteria	Bacteroidetes	Bacteroidia	Bacteroidales	Prolixibacteraceae	Prolixibacter
DN21706_c0_g1	210	27.9	7	20.1	DN21706_c0_g1_i1	G102607	G1026071		210	27.9	7	20.09	100	CDS	210	74.24	1	glycosidase	COG0366	Bacteria	Bacteroidetes	Bacteroidia	Bacteroidales	Prolixibacteraceae	Prolixibacter
DN24720_c0_g1	426	227	8	2.8	DN24720_c0_g1_i1	G135996	G1359961		426	227	8	2.82	100	CDS	423	60.29	-1	uncharacterized protein DUF4199	pfam13858	Bacteria	Bacteroidetes	Bacteroidia	Bacteroidales	Prolixibacteraceae	Prolixibacter
DN28221_c0_g1	249	54.7	3	4.4	DN28221_c0_g1_i1	G113269	G1132691		249	54.65	3	4.4	100	CDS	246	52.44	1	two-component system LytT family response regulator	KO:K02477	Bacteria	Bacteroidetes	Bacteroidia	Bacteroidales	Prolixibacteraceae	Prolixibacter
DN29623_c0_g1	254	58.7	3	4.1	DN29623_c0_g1_i1	G114440	G1144401		254	58.7	3	4.09	100	CDS	207	82.61	1	FHS family L-fucose permease-like MFS transporter	KO:K02429	Bacteria	Bacteroidetes	Bacteroidia	Bacteroidales	Prolixibacteraceae	Prolixibacter
DN32897_c0_g1	1034	835	29	2.8	DN32897_c0_g1_i1	G148027	G1480271		1034	835	29	2.78	100	CDS	1032	78.49	-1	threonyl-tRNA synthetase	KO:K01868	Bacteria	Bacteroidetes	Bacteroidia	Bacteroidales	Prolixibacteraceae	Prolixibacter
DN40449_c0_g1	276	77.9	9	9.3	DN40449_c0_g1_i1	G119117	G1191171		276	77.89	9	9.25	100	CDS	273	71.43	-1	enoyl-[acyl-carrier protein] reductase II	KO:K02371	Bacteria	Bacteroidetes	Bacteroidia	Bacteroidales	Prolixibacteraceae	Prolixibacter
DN42866_c0_g1	221	34.5	2	4.6	DN42866_c0_g1_i1	G105821	G1058211		221	34.54	2	4.64	100	CDS	219	67.12	-1	small conductance mechanosensitive channel	KO:K03442	Bacteria	Bacteroidetes	Bacteroidia	Bacteroidales	Prolixibacteraceae	Prolixibacter
DN47453_c0_g1	530	331	15	3.6	DN47453_c0_g1_i1	G140923	G1409231		530	331	15	3.63	100	CDS	528	56.65	-1	glycosidase	COG0366	Bacteria	Bacteroidetes	Bacteroidia	Bacteroidales	Prolixibacteraceae	Prolixibacter
DN10381_c0_g1	286	87.9	310	282.4	DN10381_c0_g1_i2	G144257	G1442571	1	665	466	34.72	5.97	2.11	CDS	300	63.92	-1	uncharacterized OsmC-like protein	COG1765	Bacteria	Bacteroidetes	Bacteroidia	Bacteroidales	Rikenellaceae	Acetobacteroides
DN12325_c0_g1	422	223	5	1.8	DN12325_c0_g1_i1	G135719	G1357191		422	223	5	1.8	100	CDS	420	55.4	-1	lipopolysaccharide/colanic/teichoic acid biosynthesis glycosyltransferase	COG2148	Bacteria	Bacteroidetes	Bacteroidia	Bacteroidales	Rikenellaceae	Acetobacteroides
DN13751_c0_g1	225	37.1	3	6.5	DN13751_c0_g1_i1	G106770	G1067701		225	37.13	3	6.47	100	CDS	222	66.22	1	DNA primase	KO:K02316	Bacteria	Bacteroidetes	Bacteroidia	Bacteroidales	Rikenellaceae	Acetobacteroides
DN14262_c0_g1	503	304	10	2.6	DN14262_c0_g1_i1	G139892	G1398921		503	304	10	2.63	100	CDS	402	89.39	1	CTP synthase	KO:K01937	Bacteria	Bacteroidetes	Bacteroidia	Bacteroidales	Rikenellaceae	Acetobacteroides
DN15555_c0_g1	273	75.2	4	4.3	DN15555_c0_g1_i1	G118434	G1184341	1	273	75.15	4	4.26	100	CDS	120	92.31	1	L-erythro-3,5-diaminohexanoate dehydrogenase	KO:K18012	Bacteria	Bacteroidetes	Bacteroidia	Bacteroidales	Rikenellaceae	Acetobacteroides
DN15555_c0_g1	273	75.2	4	4.3	DN15555_c0_g1_i1	G118434	G1184342	2	273	75.15	4	4.26	100	CDS	96	#N/A	1	HP	HPrule	Bacteria	Bacteroidetes	Bacteroidia	Bacteroidales	Rikenellaceae	Acetobacteroides
DN15726_c0_g1	226	37.8	5	10.6	DN15726_c0_g1_i1	G107049	G1070491		226	37.8	5	10.59	100	CDS	207	54.55	1	cysteate synthase	KO:K15527	Bacteria	Bacteroidetes	Bacteroidia	Bacteroidales	Rikenellaceae	Acetobacteroides
DN19040_c0_g1	568	369	8	1.7	DN19040_c0_g1_i1	G142043	G1420431		568	369	8	1.74	100	CDS	567	54.05	1	protease-4	KO:K04773	Bacteria	Bacteroidetes	Bacteroidia	Bacteroidales	Rikenellaceae	Acetobacteroides
DN24788_c0_g1	295	96	4	3.3	DN24788_c0_g1_i1	G122567	G1225671		295	96.03	4	3.34	100	CDS	291	78.65	1	tricorn protease	KO:K08676	Bacteria	Bacteroidetes	Bacteroidia	Bacteroidales	Rikenellaceae	Acetobacteroides
DN25764_c0_g1	308	109	7	5.1	DN25764_c0_g1_i1	G124577	G1245771	1	308	109	7	5.14	100	CDS	135	68.18	1	16S rRNA (cytosine1402-N4)-methyltransferase	KO:K03438	Bacteria	Bacteroidetes	Bacteroidia	Bacteroidales	Rikenellaceae	Acetobacteroides
DN25764_c0_g1	308	109	7	5.1	DN25764_c0_g1_i1	G124577	G1245772	2	308	109	7	5.14	100	CDS	171	#N/A	1	HP	HPrule	Bacteria	Bacteroidetes	Bacteroidia	Bacteroidales	Rikenellaceae	Acetobacteroides
DN26875_c0_g1	235	44	3	5.5	DN26875_c0_g1_i1	G109497	G1094971		235	44.04	3	5.46	100	CDS	189	73.33	1	queuine tRNA-ribosyltransferase	KO:K00773	Bacteria	Bacteroidetes	Bacteroidia	Bacteroidales	Rikenellaceae	Acetobacteroides
DN33714_c0_g1	211	28.5	2	5.6	DN33714_c0_g1_i1	G102944	G1029441		211	28.47	2	5.62	100	CDS	210	64.29	1	6-phosphofructokinase 1	KO:K00850	Bacteria	Bacteroidetes	Bacteroidia	Bacteroidales	Rikenellaceae	Acetobacteroides
DN33723_c0_g1	396	197	5	2	DN33723_c0_g1_i1	G133928	G1339281		396	197	5	2.03	100	CDS	396	86.36	-1	GTP-binding protein LepA	KO:K03596	Bacteria	Bacteroidetes	Bacteroidia	Bacteroidales	Rikenellaceae	Acetobacteroides
DN35337_c0_g1	316	117	9	6.2	DN35337_c0_g1_i1	G125755	G1257551		316	117	9	6.16	100	CDS	315	55.24	1	outer membrane cobalamin receptor	COG4206	Bacteria	Bacteroidetes	Bacteroidia	Bacteroidales	Rikenellaceae	Acetobacteroides
DN38196_c0_g1	286	87.3	4	3.7	DN38196_c0_g1_i1	G121021	G1210211		286	87.28	4	3.67	100	CDS	285	72.63	1	indolepyruvate ferredoxin oxidoreductase alpha subunit	KO:K00179	Bacteria	Bacteroidetes	Bacteroidia	Bacteroidales	Rikenellaceae	Acetobacteroides
DN45938_c0_g1	218	32.7	5	12.3	DN45938_c0_g1_i1	G104990	G1049901		218	32.65	5	12.26	100	CDS	216	58.57	-1	sugar/nucleoside kinase (ribokinase family)	COG0524	Bacteria	Bacteroidetes	Bacteroidia	Bacteroidales	Rikenellaceae	Acetobacteroides
DN49112_c0_g1	208	26.8	4	12	DN49112_c0_g1_i1	G102196	G1021961		208	26.77	4	11.96	100	CDS	204	91.18	1	predicted GTPase	COG2403	Bacteria	Bacteroidetes	Bacteroidia	Bacteroidales	Rikenellaceae	Acetobacteroides
DN6655_c0_g2	370	171	7	3.3	DN6655_c0_g2_i1	G131803	G1318031		370	171	7	3.28	100	CDS	249	63.29	-1	two-component system LytT family response regulator	KO:K02477	Bacteria	Bacteroidetes	Bacteroidia	Bacteroidales	Rikenellaceae	Acetobacteroides
DN28463_c0_g1	203	24.1	3	10	DN28463_c0_g1_i1	G100678	G1006781		203	24.07	3	9.98	100	CDS	201	77.61	1	cysteate synthase	KO:K15527	Bacteria	Bacteroidetes	Bacteroidia	Bacteroidales	Rikenellaceae	Alistipes
DN31302_c0_g1	243	50	4	6.4	DN31302_c0_g1_i1	G111709	G1117091		243	49.97	4	6.41	100	CDS	240	56.25	1	HP	HPrule	Bacteria	Bacteroidetes	Bacteroidia	Bacteroidales	Rikenellaceae	Alistipes
DN33441_c0_g1	244	50.7	3	4.7	DN33441_c0_g1_i1	G111973	G1119731		244	50.74	3	4.73	100	CDS	240	55.13	1	1,4-alpha-glucan branching enzyme	KO:K00700	Bacteria	Bacteroidetes	Bacteroidia	Bacteroidales	Rikenellaceae	Alistipes
DN36052_c0_g1	215	30.8	4	10.4	DN36052_c0_g1_i1	G104110	G1041101	1	215	30.82	4	10.39	100	CDS	111	78.38	-1	phosphatidate cytidylyltransferase	KO:K00981	Bacteria	Bacteroidetes	Bacteroidia	Bacteroidales	Rikenellaceae	Alistipes
DN36052_c0_g1	215	30.8	4	10.4	DN36052_c0_g1_i1	G104110	G1041102	2	215	30.82	4	10.39	100	CDS	96	#N/A	1	HP	HPrule	Bacteria	Bacteroidetes	Bacteroidia	Bacteroidales	Rikenellaceae	Alistipes
DN39015_c0_g1	294	95	5	4.2	DN39015_c0_g1_i1	G122433	G1224331	1	294	95.04	5	4.21	100	CDS	165	75	-1	6-pyruvoyltetrahydropterin/6-carboxytetrahydropterin synthase	KO:K01737	Bacteria	Bacteroidetes	Bacteroidia	Bacteroidales	Rikenellaceae	Alistipes
DN39015_c0_g1	294	95	5	4.2	DN39015_c0_g1_i1	G122433	G1224332	2	294	95.04	5	4.21	100	CDS	114	#N/A	-1	HP	HPrule	Bacteria	Bacteroidetes	Bacteroidia	Bacteroidales	Rikenellaceae	Alistipes
DN39180_c0_g1	223	35.8	3	6.7	DN39180_c0_g1_i1	G106377	G1063771		223	35.82	3	6.71	100	CDS	219	86.3	1	tRNA uridine 5-carboxymethylaminomethyl modification enzyme	KO:K03495	Bacteria	Bacteroidetes	Bacteroidia	Bacteroidales	Rikenellaceae	Alistipes
DN40049_c0_g1	285	86.3	6	5.6	DN40049_c0_g1_i1	G120851	G1208511		285	86.32	6	5.57	100	CDS	246	54.43	1	UDP-N-acetylglucosamine--N-acetylmuramyl-(pentapeptide) pyrophosphoryl-undecaprenol N-acetylglucosamine transferase	KO:K02563	Bacteria	Bacteroidetes	Bacteroidia	Bacteroidales	Rikenellaceae	Alistipes
DN5806_c0_g1	251	56.3	7	10	DN5806_c0_g1_i1	G113887	G1138871		251	56.26	7	9.96	100	CDS	249	66.27	-1	DNA topoisomerase-1	KO:K03168	Bacteria	Bacteroidetes	Bacteroidia	Bacteroidales	Rikenellaceae	Alistipes
DN12056_c0_g1	265	68	4	4.7	DN12056_c0_g1_i1	G116803	G1168031		265	68.02	4	4.71	100	CDS	264	56.47	-1	NhaP-type Na+/H+ or K+/H+ antiporter	COG0025	Bacteria	Bacteroidetes	Bacteroidia	Bacteroidales	Rikenellaceae	Mucinivorans
DN34459_c0_g1	229	39.8	3	6	DN34459_c0_g1_i1	G107956	G1079561		229	39.82	3	6.03	100	CDS	228	71.05	1	S-adenosylmethionine synthetase	KO:K00789	Bacteria	Bacteroidetes	Bacteroidia	Bacteroidales	Rikenellaceae	Rikenella
DN18360_c0_g1	309	110	9	6.6	DN18360_c0_g1_i1	G124700	G1247001		309	110	9	6.55	100	CDS	300	67.02	1	prolyl-tRNA synthetase	KO:K01881	Bacteria	Bacteroidetes	Bacteroidia	Bacteroidales	Tannerellaceae	Parabacteroides
DN19707_c0_g1	286	87.3	4	3.7	DN19707_c0_g1_i1	G120955	G1209551		286	87.28	4	3.67	100	CDS	285	55.32	1	HP	HPrule	Bacteria	Bacteroidetes	Bacteroidia	Bacteroidales	Tannerellaceae	Parabacteroides
DN21820_c0_g1	325	126	7	4.5	DN21820_c0_g1_i1	G126868	G1268681		325	126	7	4.45	100	CDS	321	56.19	1	HP	HPrule	Bacteria	Bacteroidetes	Bacteroidia	Bacteroidales	Tannerellaceae	Parabacteroides
DN36074_c0_g1	426	227	6	2.1	DN36074_c0_g1_i1	G136022	G1360221		426	227	6	2.12	100	CDS	381	46.15	1	signal transduction histidine kinase	COG0642	Bacteria	Bacteroidetes	Bacteroidia	Bacteroidales	Tannerellaceae	Parabacteroides
DN46298_c0_g1	270	72.4	6	6.6	DN46298_c0_g1_i1	G117982	G1179821		270	72.44	6	6.63	100	CDS	267	59.55	-1	HP	HPrule	Bacteria	Bacteroidetes	Bacteroidia	Bacteroidales	Tannerellaceae	Parabacteroides
DN46604_c0_g1	208	26.8	3	9	DN46604_c0_g1_i1	G102180	G1021801		208	26.77	3	8.97	100	CDS	207	81.16	1	indolepyruvate ferredoxin oxidoreductase beta subunit	KO:K00180	Bacteria	Bacteroidetes	Bacteroidia	Bacteroidales	Tannerellaceae	Parabacteroides
DN47378_c0_g1	300	101	6	4.8	DN47378_c0_g1_i1	G123455	G1234551		300	101	6	4.76	100	CDS	297	73.74	-1	HP	HPrule	Bacteria	Bacteroidetes	Bacteroidia	Bacteroidales	Tannerellaceae	Parabacteroides
DN11933_c0_g1	326	127	7	4.4	DN11933_c0_g1_i1	G126978	G1269781	1	326	127	7	4.41	100	CDS	222	60.87	1	23S rRNA (adenine2503-C2)-methyltransferase	KO:K06941	Bacteria	Bacteroidetes	Bacteroidia	Bacteroidales
DN11933_c0_g1	326	127	7	4.4	DN11933_c0_g1_i1	G126978	G1269782	2	326	127	7	4.41	100	CDS	141	81.82	1	23S rRNA (adenine2503-C2)-methyltransferase	KO:K06941	Bacteria	Bacteroidetes	Bacteroidia	Bacteroidales
DN13772_c0_g1	236	44.8	3	5.4	DN13772_c0_g1_i1	G109728	G1097281		236	44.76	3	5.37	100	CDS	192	41.94	1	HP	HPrule	Bacteria	Bacteroidetes	Bacteroidia	Bacteroidales
DN14475_c0_g1	679	480	26	4.3	DN14475_c0_g1_i1	G144503	G1445031		679	480	26	4.34	100	CDS	675	76.23	-1	HP	HPrule	Bacteria	Bacteroidetes	Bacteroidia	Bacteroidales
DN19917_c0_g1	264	67.2	4	4.8	DN19917_c0_g1_i1	G116616	G1166161		264	67.15	4	4.77	100	CDS	261	51.76	1	phosphomannomutase	KO:K01840	Bacteria	Bacteroidetes	Bacteroidia	Bacteroidales
DN21350_c0_g1	441	242	9	3	DN21350_c0_g1_i1	G136936	G1369361		441	242	9	2.98	100	CDS	441	54.86	-1	S1-C subfamily serine protease	COG0265	Bacteria	Bacteroidetes	Bacteroidia	Bacteroidales
DN21555_c0_g1	257	61.2	4	5.2	DN21555_c0_g1_i1	G115084	G1150841		257	61.18	4	5.24	100	CDS	255	83.53	1	cytochrome d ubiquinol oxidase subunit I	KO:K00425	Bacteria	Bacteroidetes	Bacteroidia	Bacteroidales
DN2297_c0_g1	2702	2503	215	6.9	DN2297_c0_g1_i1	G150855	G1508551		2702	2503	215	6.88	100	CDS	2700	51.49	1	subtilase family protein	pfam00082	Bacteria	Bacteroidetes	Bacteroidia	Bacteroidales
DN25102_c0_g1	1209	1010	198	15.7	DN25102_c0_g1_i1	G148835	G1488351	1	1209	1010	198	15.7	100	CDS	564	54.27	1	outer membrane protein	KO:K06142	Bacteria	Bacteroidetes	Bacteroidia	Bacteroidales
DN25102_c0_g1	1209	1010	198	15.7	DN25102_c0_g1_i1	G148835	G1488352	2	1209	1010	198	15.7	100	CDS	516	44.19	1	outer membrane protein	KO:K06142	Bacteria	Bacteroidetes	Bacteroidia	Bacteroidales
DN26462_c0_g1	426	227	14	4.9	DN26462_c0_g1_i1	G136001	G1360011		426	227	14	4.94	100	CDS	408	55.04	-1	HP	HPrule	Bacteria	Bacteroidetes	Bacteroidia	Bacteroidales
DN29458_c0_g1	235	44	6	10.9	DN29458_c0_g1_i1	G109512	G1095121		235	44.04	6	10.91	100	CDS	234	68.42	-1	tricorn protease	KO:K08676	Bacteria	Bacteroidetes	Bacteroidia	Bacteroidales
DN29568_c0_g1	210	27.9	4	11.5	DN29568_c0_g1_i1	G102655	G1026551		210	27.9	4	11.48	100	CDS	144	59.57	-1	HP	HPrule	Bacteria	Bacteroidetes	Bacteroidia	Bacteroidales
DN31036_c0_g1	497	298	22	5.9	DN31036_c0_g1_i1	G139668	G1396681		497	298	22	5.91	100	CDS	495	56.71	-1	AcrR family transcriptional regulator	COG1309	Bacteria	Bacteroidetes	Bacteroidia	Bacteroidales
DN34750_c0_g1	241	48.5	5	8.3	DN34750_c0_g1_i1	G111136	G1111361		241	48.46	5	8.26	100	CDS	240	88.75	1	acetyl-CoA synthetase	KO:K01895	Bacteria	Bacteroidetes	Bacteroidia	Bacteroidales
DN37242_c0_g1	365	166	6	2.9	DN37242_c0_g1_i1	G131318	G1313181		365	166	6	2.89	100	CDS	363	68.91	1	two-component system alkaline phosphatase synthesis response regulator PhoP	KO:K07658	Bacteria	Bacteroidetes	Bacteroidia	Bacteroidales
DN38089_c0_g1	1594	1395	72	4.1	DN38089_c0_g1_i1	G149910	G1499101	1	1594	1395	72	4.13	100	CDS	639	70.39	1	uridine kinase	KO:K00876	Bacteria	Bacteroidetes	Bacteroidia	Bacteroidales
DN38089_c0_g1	1594	1395	72	4.1	DN38089_c0_g1_i1	G149910	G1499102	2	1594	1395	72	4.13	100	CDS	816	58.91	1	L-serine dehydratase	KO:K01752	Bacteria	Bacteroidetes	Bacteroidia	Bacteroidales
DN39041_c0_g1	335	136	8	4.7	DN39041_c0_g1_i1	G128219	G1282191		335	136	8	4.71	100	CDS	333	45.05	1	CRP/FNR family transcriptional regulator	KO:K01420	Bacteria	Bacteroidetes	Bacteroidia	Bacteroidales
DN41014_c0_g1	324	125	6	3.8	DN41014_c0_g1_i1	G126778	G1267781	1	324	125	6	3.84	100	CDS	189	71.19	1	glutaredoxin	COG0695	Bacteria	Bacteroidetes	Bacteroidia	Bacteroidales
DN41014_c0_g1	324	125	6	3.8	DN41014_c0_g1_i1	G126778	G1267782	2	324	125	6	3.84	100	CDS	114	76.32	1	chaperonin GroES	KO:K04078	Bacteria	Bacteroidetes	Bacteroidia	Bacteroidales
DN41411_c0_g1	218	32.7	3	7.4	DN41411_c0_g1_i1	G104961	G1049611		218	32.65	3	7.36	100	CDS	216	93.06	-1	ATPase subunit of ABC transporter with duplicated ATPase domains	COG0488	Bacteria	Bacteroidetes	Bacteroidia	Bacteroidales
DN43065_c0_g1	420	221	6	2.2	DN43065_c0_g1_i1	G135610	G1356101		420	221	6	2.17	100	CDS	420	80	-1	acetyl-CoA synthetase	KO:K01895	Bacteria	Bacteroidetes	Bacteroidia	Bacteroidales
DN44466_c0_g1	707	508	11	1.7	DN44466_c0_g1_i1	G144976	G1449761		707	508	11	1.73	100	CDS	705	82.13	1	dTDP-glucose 4,6-dehydratase	KO:K01710	Bacteria	Bacteroidetes	Bacteroidia	Bacteroidales
DN46558_c0_g1	228	39.1	4	8.2	DN46558_c0_g1_i1	G107777	G1077771		228	39.14	4	8.18	100	CDS	225	65.33	1	acetyl-CoA synthetase	KO:K01895	Bacteria	Bacteroidetes	Bacteroidia	Bacteroidales
DN47262_c0_g1	296	97	3	2.5	DN47262_c0_g1_i1	G122801	G1228011		296	97.02	3	2.48	100	CDS	294	55.67	1	HP	KO:K07047	Bacteria	Bacteroidetes	Bacteroidia	Bacteroidales
DN49540_c0_g1	224	36.5	3	6.6	DN49540_c0_g1_i1	G106705	G1067051		224	36.47	3	6.59	100	CDS	108	72.22	-1	LysR family hydrogen peroxide-inducible transcriptional activator	KO:K04761	Bacteria	Bacteroidetes	Bacteroidia	Bacteroidales
DN570_c0_g1	596	397	51	10.3	DN570_c0_g1_i1	G142821	G1428211	1	596	397	51	10.29	100	CDS	165	79.25	-1	fused signal recognition particle receptor	KO:K03110	Bacteria	Bacteroidetes	Bacteroidia	Bacteroidales
DN570_c0_g1	596	397	51	10.3	DN570_c0_g1_i1	G142821	G1428212	2	596	397	51	10.29	100	CDS	156	72	-1	uncharacterized protein DUF4295	pfam14128	Bacteria	Bacteroidetes	Bacteroidia	Bacteroidales
DN570_c0_g1	596	397	51	10.3	DN570_c0_g1_i1	G142821	G1428213	3	596	397	51	10.29	100	CDS	198	93.55	-1	large subunit ribosomal protein L33	KO:K02913	Bacteria	Bacteroidetes	Bacteroidia	Bacteroidales
DN570_c1_g1	829	630	21	2.7	DN570_c1_g1_i1	G146492	G1464921		829	630	21	2.67	100	CDS	828	81.88	-1	fused signal recognition particle receptor	KO:K03110	Bacteria	Bacteroidetes	Bacteroidia	Bacteroidales
DN6449_c0_g1	1757	1558	113	5.8	DN6449_c0_g1_i1	G150161	G1501611	1	1757	1558	113	5.81	100	CDS	459	55.48	1	uncharacterized protein DUF1573	pfam07610	Bacteria	Bacteroidetes	Bacteroidia	Bacteroidales
DN6449_c0_g1	1757	1558	113	5.8	DN6449_c0_g1_i1	G150161	G1501612	2	1757	1558	113	5.81	100	CDS	1200	69.42	1	aspartate aminotransferase	KO:K00812	Bacteria	Bacteroidetes	Bacteroidia	Bacteroidales
DN10361_c0_g1	4597	4398	805	14.7	DN10361_c0_g1_i1	G151176	G1511761	1	4597	4398	805	14.66	100	CDS	1224	49.88	1	ABC-type Fe3+ transport system substrate-binding protein	COG1840	Bacteria	Bacteroidetes	Bacteroidia	Marinilabiliales	Marinifilaceae	Labilibaculum
DN10361_c0_g1	4597	4398	805	14.7	DN10361_c0_g1_i1	G151176	G1511762	2	4597	4398	805	14.66	100	CDS	699	81.82	1	Ni2+-binding GTPase involved in maturation of urease and hydrogenase	COG0378	Bacteria	Bacteroidetes	Bacteroidia	Marinilabiliales	Marinifilaceae	Labilibaculum
DN10361_c0_g1	4597	4398	805	14.7	DN10361_c0_g1_i1	G151176	G1511763	3	4597	4398	805	14.66	100	CDS	1005	63.58	1	ABC-type lipoprotein export system ATPase subunit	COG1136	Bacteria	Bacteroidetes	Bacteroidia	Marinilabiliales	Marinifilaceae	Labilibaculum
DN10361_c0_g1	4597	4398	805	14.7	DN10361_c0_g1_i1	G151176	G1511764	4	4597	4398	805	14.66	100	CDS	249	69.62	1	HP	HPrule	Bacteria	Bacteroidetes	Bacteroidia	Marinilabiliales	Marinifilaceae	Labilibaculum
DN10361_c0_g1	4597	4398	805	14.7	DN10361_c0_g1_i1	G151176	G1511765	5	4597	4398	805	14.66	100	CDS	1230	47.87	1	HP	KO:K09155	Bacteria	Bacteroidetes	Bacteroidia	Marinilabiliales	Marinifilaceae	Labilibaculum
DN10361_c0_g1	4597	4398	805	14.7	DN10361_c0_g1_i1	G151176	G1511766	6	4597	4398	805	14.66	100	CDS	93	#N/A	1	HP	COG3295	Bacteria	Bacteroidetes	Bacteroidia	Marinilabiliales	Marinifilaceae	Labilibaculum
DN12452_c0_g1	1064	865	103	9.5	DN12452_c0_g1_i1	G148199	G1481991		1064	865	103	9.54	100	CDS	1020	67.36	-1	branched-chain amino acid aminotransferase	KO:K00826	Bacteria	Bacteroidetes	Bacteroidia	Marinilabiliales	Marinifilaceae	Labilibaculum
DN12557_c0_g1	244	50.7	3	4.7	DN12557_c0_g1_i1	G111859	G1118591		244	50.74	3	4.73	100	CDS	219	80.82	1	POT family proton-dependent oligopeptide transporter	KO:K03305	Bacteria	Bacteroidetes	Bacteroidia	Marinilabiliales	Marinifilaceae	Labilibaculum
DN12807_c0_g1	372	173	5	2.3	DN12807_c0_g1_i1	G131900	G1319001		372	173	5	2.31	100	CDS	147	87.23	1	peptide chain release factor 2	KO:K02836	Bacteria	Bacteroidetes	Bacteroidia	Marinilabiliales	Marinifilaceae	Labilibaculum
DN13100_c0_g1	267	69.8	6	6.9	DN13100_c0_g1_i1	G117237	G1172371		267	69.78	6	6.89	100	CDS	264	59.04	-1	methylmalonyl-CoA mutase	KO:K01847	Bacteria	Bacteroidetes	Bacteroidia	Marinilabiliales	Marinifilaceae	Labilibaculum
DN14179_c0_g1	901	702	25	2.9	DN14179_c0_g1_i1	G147139	G1471391	1	901	702	25	2.85	100	CDS	288	84.21	1	predicted transcriptional regulator	COG1777	Bacteria	Bacteroidetes	Bacteroidia	Marinilabiliales	Marinifilaceae	Labilibaculum
DN14179_c0_g1	901	702	25	2.9	DN14179_c0_g1_i1	G147139	G1471392	2	901	702	25	2.85	100	CDS	234	80.52	1	predicted thioredoxin/glutaredoxin	COG5494	Bacteria	Bacteroidetes	Bacteroidia	Marinilabiliales	Marinifilaceae	Labilibaculum
DN14179_c0_g1	901	702	25	2.9	DN14179_c0_g1_i1	G147139	G1471393	3	901	702	25	2.85	100	CDS	276	62.64	1	HP	HPrule	Bacteria	Bacteroidetes	Bacteroidia	Marinilabiliales	Marinifilaceae	Labilibaculum
DN14287_c0_g1	632	433	18	3.3	DN14287_c0_g1_i1	G143611	G1436111		632	433	18	3.33	100	CDS	630	59.71	1	2-oxoglutarate ferredoxin oxidoreductase subunit alpha	KO:K00174	Bacteria	Bacteroidetes	Bacteroidia	Marinilabiliales	Marinifilaceae	Labilibaculum
DN14402_c0_g1	251	56.3	6	8.5	DN14402_c0_g1_i1	G113698	G1136981	1	251	56.26	6	8.54	100	CDS	81	#N/A	-1	HP	HPrule	Bacteria	Bacteroidetes	Bacteroidia	Marinilabiliales	Marinifilaceae	Labilibaculum
DN14402_c0_g1	251	56.3	6	8.5	DN14402_c0_g1_i1	G113698	G1136982	2	251	56.26	6	8.54	100	CDS	111	82.76	-1	protein-tyrosine phosphatase	KO:K01104	Bacteria	Bacteroidetes	Bacteroidia	Marinilabiliales	Marinifilaceae	Labilibaculum
DN17273_c0_g1	329	130	9	5.5	DN17273_c0_g1_i1	G127410	G1274101		329	130	9	5.54	100	CDS	327	81.65	-1	imidazolonepropionase	KO:K01468	Bacteria	Bacteroidetes	Bacteroidia	Marinilabiliales	Marinifilaceae	Labilibaculum
DN17496_c0_g1	256	60.4	5	6.6	DN17496_c0_g1_i1	G114847	G1148471		256	60.35	5	6.63	100	CDS	252	37.5	1	3-methylcrotonyl-CoA carboxylase alpha subunit	KO:K01968	Bacteria	Bacteroidetes	Bacteroidia	Marinilabiliales	Marinifilaceae	Labilibaculum
DN17550_c0_g1	254	58.7	5	6.8	DN17550_c0_g1_i1	G114380	G1143801		254	58.7	5	6.82	100	CDS	252	79.76	-1	tRNA-2-methylthio-N6-dimethylallyladenosine synthase	KO:K06168	Bacteria	Bacteroidetes	Bacteroidia	Marinilabiliales	Marinifilaceae	Labilibaculum
DN18866_c0_g1	218	32.7	4	9.8	DN18866_c0_g1_i1	G104833	G1048331		218	32.65	4	9.81	100	CDS	216	41.67	-1	gingipain R	KO:K08589	Bacteria	Bacteroidetes	Bacteroidia	Marinilabiliales	Marinifilaceae	Labilibaculum
DN24286_c0_g1	919	720	26	2.9	DN24286_c0_g1_i1	G147279	G1472791		919	720	26	2.89	100	CDS	912	72.13	1	POT family proton-dependent oligopeptide transporter	KO:K03305	Bacteria	Bacteroidetes	Bacteroidia	Marinilabiliales	Marinifilaceae	Labilibaculum
DN26808_c0_g1	208	26.8	3	9	DN26808_c0_g1_i1	G102069	G1020691		208	26.77	3	8.97	100	CDS	207	37.68	-1	ABC-2 type transport system ATP-binding protein	KO:K01990	Bacteria	Bacteroidetes	Bacteroidia	Marinilabiliales	Marinifilaceae	Labilibaculum
DN27511_c0_g1	426	227	14	4.9	DN27511_c0_g1_i1	G136004	G1360041		426	227	14	4.94	100	CDS	426	51.45	1	HP	HPrule	Bacteria	Bacteroidetes	Bacteroidia	Marinilabiliales	Marinifilaceae	Labilibaculum
DN28077_c0_g1	376	177	9	4.1	DN28077_c0_g1_i1	G132283	G1322831		376	177	9	4.07	100	CDS	375	100	1	HP	HPrule	Bacteria	Bacteroidetes	Bacteroidia	Marinilabiliales	Marinifilaceae	Labilibaculum
DN29258_c0_g1	203	24.1	4	13.3	DN29258_c0_g1_i1	G100682	G1006821		203	24.07	4	13.31	100	CDS	201	74.07	-1	HP	HPrule	Bacteria	Bacteroidetes	Bacteroidia	Marinilabiliales	Marinifilaceae	Labilibaculum
DN30731_c0_g1	998	799	24	2.4	DN30731_c0_g1_i1	G147813	G1478131	1	998	799	24	2.41	100	CDS	819	72.83	1	quinolinate synthase	KO:K03517	Bacteria	Bacteroidetes	Bacteroidia	Marinilabiliales	Marinifilaceae	Labilibaculum
DN30731_c0_g1	998	799	24	2.4	DN30731_c0_g1_i1	G147813	G1478132	2	998	799	24	2.41	100	CDS	168	#N/A	1	HP	HPrule	Bacteria	Bacteroidetes	Bacteroidia	Marinilabiliales	Marinifilaceae	Labilibaculum
DN31626_c0_g1	457	258	8	2.5	DN31626_c0_g1_i1	G137798	G1377981		457	258	8	2.48	100	CDS	456	55.56	-1	alpha amylase catalytic subunit	pfam00128	Bacteria	Bacteroidetes	Bacteroidia	Marinilabiliales	Marinifilaceae	Labilibaculum
DN32075_c0_g1	318	119	4	2.7	DN32075_c0_g1_i1	G125996	G1259961		318	119	4	2.69	100	CDS	195	47.62	1	adenylate kinase	KO:K00939	Bacteria	Bacteroidetes	Bacteroidia	Marinilabiliales	Marinifilaceae	Labilibaculum
DN33141_c0_g1	476	277	9	2.6	DN33141_c0_g1_i1	G138767	G1387671		476	277	9	2.6	100	CDS	474	83.97	1	predicted GTPase	COG2403	Bacteria	Bacteroidetes	Bacteroidia	Marinilabiliales	Marinifilaceae	Labilibaculum
DN33400_c0_g1	296	97	7	5.8	DN33400_c0_g1_i1	G122758	G1227581	1	296	97.02	7	5.78	100	CDS	162	74	1	HP	HPrule	Bacteria	Bacteroidetes	Bacteroidia	Marinilabiliales	Marinifilaceae	Labilibaculum
DN33400_c0_g1	296	97	7	5.8	DN33400_c0_g1_i1	G122758	G1227582	2	296	97.02	7	5.78	100	CDS	129	95.35	1	HP	HPrule	Bacteria	Bacteroidetes	Bacteroidia	Marinilabiliales	Marinifilaceae	Labilibaculum
DN33408_c0_g1	266	68.9	3	3.5	DN33408_c0_g1_i1	G117110	G1171101		266	68.9	3	3.49	100	CDS	264	64.77	1	transcriptional regulator with XRE-family HTH domain	COG1396	Bacteria	Bacteroidetes	Bacteroidia	Marinilabiliales	Marinifilaceae	Labilibaculum
DN33472_c0_g1	374	175	7	3.2	DN33472_c0_g1_i1	G132114	G1321141		374	175	7	3.2	100	CDS	372	62.1	1	cytochrome c oxidase subunit 3	KO:K02276	Bacteria	Bacteroidetes	Bacteroidia	Marinilabiliales	Marinifilaceae	Labilibaculum
DN35168_c0_g1	331	132	5	3	DN35168_c0_g1_i1	G127729	G1277291		331	132	5	3.03	100	CDS	240	77.92	-1	1,4-alpha-glucan branching enzyme	COG0296	Bacteria	Bacteroidetes	Bacteroidia	Marinilabiliales	Marinifilaceae	Labilibaculum
DN36266_c0_g1	298	99	3	2.4	DN36266_c0_g1_i1	G123089	G1230891		298	99	3	2.43	100	CDS	177	51.79	1	HP	HPrule	Bacteria	Bacteroidetes	Bacteroidia	Marinilabiliales	Marinifilaceae	Labilibaculum
DN3783_c0_g1	703	504	66	10.5	DN3783_c0_g1_i1	G144918	G1449181		703	504	66	10.49	100	CDS	690	48.91	1	TolA-binding protein	COG1729	Bacteria	Bacteroidetes	Bacteroidia	Marinilabiliales	Marinifilaceae	Labilibaculum
DN37889_c0_g1	277	78.8	3	3.1	DN37889_c0_g1_i1	G119299	G1192991		277	78.81	3	3.05	100	CDS	273	73.33	-1	CubicO group peptidase (beta-lactamase class C family)	COG1680	Bacteria	Bacteroidetes	Bacteroidia	Marinilabiliales	Marinifilaceae	Labilibaculum
DN38080_c0_g1	317	118	6	4.1	DN38080_c0_g1_i1	G125890	G1258901		317	118	6	4.07	100	CDS	315	75	1	phosphate butyryltransferase	KO:K00634	Bacteria	Bacteroidetes	Bacteroidia	Marinilabiliales	Marinifilaceae	Labilibaculum
DN38419_c0_g1	418	219	10	3.7	DN38419_c0_g1_i1	G135483	G1354831		418	219	10	3.66	100	CDS	414	40	-1	CRP-like cAMP-binding protein	COG0664	Bacteria	Bacteroidetes	Bacteroidia	Marinilabiliales	Marinifilaceae	Labilibaculum
DN40045_c0_g1	335	136	8	4.7	DN40045_c0_g1_i1	G128223	G1282231		335	136	8	4.71	100	CDS	285	66.3	1	electron transfer flavoprotein beta subunit	KO:K03521	Bacteria	Bacteroidetes	Bacteroidia	Marinilabiliales	Marinifilaceae	Labilibaculum
DN43354_c0_g1	201	23	4	13.9	DN43354_c0_g1_i1	G100219	G1002191		201	23.03	4	13.91	100	CDS	198	61.54	1	acetylornithine/succinyldiaminopimelate/putrescine aminotransferase	COG4992	Bacteria	Bacteroidetes	Bacteroidia	Marinilabiliales	Marinifilaceae	Labilibaculum
DN44035_c0_g1	400	201	7	2.8	DN44035_c0_g1_i1	G134249	G1342491		400	201	7	2.79	100	CDS	396	76.34	-1	tryptophanase	KO:K01667	Bacteria	Bacteroidetes	Bacteroidia	Marinilabiliales	Marinifilaceae	Labilibaculum
DN48937_c0_g1	331	132	50	30.3	DN48937_c0_g1_i1	G127764	G1277641		331	132	50	30.33	100	CDS	273	78.89	-1	DNA-binding protein HU-beta	KO:K03530	Bacteria	Bacteroidetes	Bacteroidia	Marinilabiliales	Marinifilaceae	Labilibaculum
DN49992_c0_g1	243	50	4	6.4	DN49992_c0_g1_i1	G111804	G1118041		243	49.97	4	6.41	100	CDS	240	72.5	1	16S rRNA (cytidine1402-2'-O)-methyltransferase	KO:K07056	Bacteria	Bacteroidetes	Bacteroidia	Marinilabiliales	Marinifilaceae	Labilibaculum
DN5129_c0_g1	347	148	6	3.3	DN5129_c0_g1_i1	G129561	G1295611		347	148	6	3.25	100	CDS	345	92.17	-1	oligopeptidase B	KO:K01354	Bacteria	Bacteroidetes	Bacteroidia	Marinilabiliales	Marinifilaceae	Labilibaculum
DN9416_c0_g1	1905	1706	185	8.7	DN9416_c0_g1_i1	G150308	G1503081	1	1905	1706	185	8.68	100	CDS	660	96.33	1	HP	HPrule	Bacteria	Bacteroidetes	Bacteroidia	Marinilabiliales	Marinifilaceae	Labilibaculum
DN9416_c0_g1	1905	1706	185	8.7	DN9416_c0_g1_i1	G150308	G1503082	2	1905	1706	185	8.68	100	CDS	363	#N/A	-1	HP	HPrule	Bacteria	Bacteroidetes	Bacteroidia	Marinilabiliales	Marinifilaceae	Labilibaculum
DN11930_c0_g1	223	35.8	3	6.7	DN11930_c0_g1_i1	G106220	G1062201		223	35.82	3	6.71	100	CDS	222	61.97	-1	Xaa-Pro aminopeptidase	KO:K01262	Bacteria	Bacteroidetes	Bacteroidia	Marinilabiliales	Marinifilaceae	Marinifilum
DN18276_c0_g1	773	574	13	1.8	DN18276_c0_g1_i1	G145869	G1458691		773	574	13	1.81	100	CDS	630	49.51	1	HP	HPrule	Bacteria	Bacteroidetes	Bacteroidia	Marinilabiliales	Marinifilaceae	Marinifilum
DN20791_c0_g1	444	245	8	2.6	DN20791_c0_g1_i1	G137093	G1370931		444	245	8	2.61	100	CDS	441	53.42	1	ferrous iron transport protein B	KO:K04759	Bacteria	Bacteroidetes	Bacteroidia	Marinilabiliales	Marinifilaceae	Marinifilum
DN22607_c0_g1	900	701	34	3.9	DN22607_c0_g1_i1	G147131	G1471311		900	701	34	3.88	100	CDS	813	42.49	-1	peptidase C25-like protein	pfam01364	Bacteria	Bacteroidetes	Bacteroidia	Marinilabiliales	Marinifilaceae	Marinifilum
DN22963_c0_g1	250	55.5	3	4.3	DN22963_c0_g1_i1	G113519	G1135191		250	55.45	3	4.33	100	CDS	249	56.63	1	uridine kinase	KO:K00876	Bacteria	Bacteroidetes	Bacteroidia	Marinilabiliales	Marinifilaceae	Marinifilum
DN23520_c0_g1	389	190	4	1.7	DN23520_c0_g1_i1	G133391	G1333911		389	190	4	1.69	100	CDS	387	69.67	1	HP	KO:K00540	Bacteria	Bacteroidetes	Bacteroidia	Marinilabiliales	Marinifilaceae	Marinifilum
DN25542_c0_g1	1301	1102	50	3.6	DN25542_c0_g1_i1	G149167	G1491671		1301	1102	50	3.63	100	CDS	885	75.78	1	[acyl-carrier-protein] S-malonyltransferase	KO:K00645	Bacteria	Bacteroidetes	Bacteroidia	Marinilabiliales	Marinifilaceae	Marinifilum
DN26006_c0_g1	378	179	4	1.8	DN26006_c0_g1_i1	G132462	G1324621		378	179	4	1.79	100	CDS	375	56.35	1	bleomycin hydrolase	KO:K01372	Bacteria	Bacteroidetes	Bacteroidia	Marinilabiliales	Marinifilaceae	Marinifilum
DN26439_c0_g1	250	55.5	5	7.2	DN26439_c0_g1_i1	G113535	G1135351		250	55.45	5	7.22	100	CDS	246	69.51	1	HP	HPrule	Bacteria	Bacteroidetes	Bacteroidia	Marinilabiliales	Marinifilaceae	Marinifilum
DN27116_c0_g1	399	200	7	2.8	DN27116_c0_g1_i1	G134153	G1341531		399	200	7	2.8	100	CDS	399	67.67	-1	peptide chain release factor 3	KO:K02837	Bacteria	Bacteroidetes	Bacteroidia	Marinilabiliales	Marinifilaceae	Marinifilum
DN27839_c0_g1	422	223	11	4	DN27839_c0_g1_i1	G135745	G1357451		422	223	11	3.95	100	CDS	420	77.14	-1	methionyl-tRNA synthetase	KO:K01874	Bacteria	Bacteroidetes	Bacteroidia	Marinilabiliales	Marinifilaceae	Marinifilum
DN28187_c0_g1	236	44.8	4	7.2	DN28187_c0_g1_i1	G109794	G1097941		236	44.76	4	7.16	100	CDS	234	52.56	-1	prolipoprotein diacylglyceryltransferase	COG0682	Bacteria	Bacteroidetes	Bacteroidia	Marinilabiliales	Marinifilaceae	Marinifilum
DN30193_c0_g1	276	77.9	3	3.1	DN30193_c0_g1_i1	G119075	G1190751		276	77.89	3	3.08	100	CDS	273	48.31	-1	curli production assembly/transport component CsgG	KO:K06214	Bacteria	Bacteroidetes	Bacteroidia	Marinilabiliales	Marinifilaceae	Marinifilum
DN32086_c0_g1	486	287	13	3.6	DN32086_c0_g1_i1	G139230	G1392301		486	287	13	3.63	100	CDS	486	79.01	1	3-methyl-2-oxobutanoate hydroxymethyltransferase	KO:K00606	Bacteria	Bacteroidetes	Bacteroidia	Marinilabiliales	Marinifilaceae	Marinifilum
DN32817_c0_g1	255	59.5	6	8.1	DN32817_c0_g1_i1	G114683	G1146831		255	59.52	6	8.07	100	CDS	255	71.43	1	AhpC/TSA family protein	pfam00578	Bacteria	Bacteroidetes	Bacteroidia	Marinilabiliales	Marinifilaceae	Marinifilum
DN32933_c0_g1	776	577	18	2.5	DN32933_c0_g1_i1	G145906	G1459061		776	577	18	2.5	100	CDS	774	45.45	1	uncharacterized iron-regulated membrane protein	COG3182	Bacteria	Bacteroidetes	Bacteroidia	Marinilabiliales	Marinifilaceae	Marinifilum
DN34208_c0_g1	635	436	27	5	DN34208_c0_g1_i1	G143683	G1436831		635	436	27	4.96	100	CDS	606	84.08	1	citrate synthase	KO:K01647	Bacteria	Bacteroidetes	Bacteroidia	Marinilabiliales	Marinifilaceae	Marinifilum
DN34540_c0_g1	610	411	11	2.1	DN34540_c0_g1_i1	G143131	G1431311		610	411	11	2.14	100	CDS	609	50.53	1	protein SCO1/2	KO:K07152	Bacteria	Bacteroidetes	Bacteroidia	Marinilabiliales	Marinifilaceae	Marinifilum
DN35279_c0_g1	948	749	28	3	DN35279_c0_g1_i1	G147498	G1474981		948	749	28	2.99	100	CDS	945	48.73	-1	cytochrome c biogenesis protein ResB	COG1333	Bacteria	Bacteroidetes	Bacteroidia	Marinilabiliales	Marinifilaceae	Marinifilum
DN36316_c0_g1	384	185	5	2.2	DN36316_c0_g1_i1	G132990	G1329901		384	185	5	2.16	100	CDS	384	68.75	1	HP	HPrule	Bacteria	Bacteroidetes	Bacteroidia	Marinilabiliales	Marinifilaceae	Marinifilum
DN37831_c0_g1	428	229	11	3.9	DN37831_c0_g1_i1	G136157	G1361571		428	229	11	3.85	100	CDS	369	50.82	-1	bleomycin hydrolase	KO:K01372	Bacteria	Bacteroidetes	Bacteroidia	Marinilabiliales	Marinifilaceae	Marinifilum
DN38106_c0_g1	604	405	16	3.2	DN38106_c0_g1_i1	G143009	G1430091		604	405	16	3.16	100	CDS	603	72.64	1	TPP-dependent pyruvate/acetoin dehydrogenase alpha subunit	COG1071	Bacteria	Bacteroidetes	Bacteroidia	Marinilabiliales	Marinifilaceae	Marinifilum
DN38788_c0_g1	477	278	13	3.7	DN38788_c0_g1_i1	G138818	G1388181	1	477	278	13	3.74	100	CDS	126	#N/A	1	HP	HPrule	Bacteria	Bacteroidetes	Bacteroidia	Marinilabiliales	Marinifilaceae	Marinifilum
DN38788_c0_g1	477	278	13	3.7	DN38788_c0_g1_i1	G138818	G1388182	2	477	278	13	3.74	100	CDS	345	60.53	1	cytochrome c oxidase subunit 2	KO:K02275	Bacteria	Bacteroidetes	Bacteroidia	Marinilabiliales	Marinifilaceae	Marinifilum
DN39582_c0_g1	351	152	6	3.2	DN39582_c0_g1_i1	G129956	G1299561		351	152	6	3.16	100	CDS	348	64.66	-1	LacI family transcriptional regulator	KO:K02529	Bacteria	Bacteroidetes	Bacteroidia	Marinilabiliales	Marinifilaceae	Marinifilum
DN41396_c0_g1	287	88.2	4	3.6	DN41396_c0_g1_i1	G121204	G1212041		287	88.24	4	3.63	100	CDS	285	72.63	1	proline dehydrogenase	KO:K00318	Bacteria	Bacteroidetes	Bacteroidia	Marinilabiliales	Marinifilaceae	Marinifilum
DN42230_c0_g1	213	29.6	3	8.1	DN42230_c0_g1_i1	G103557	G1035571		213	29.64	3	8.11	100	CDS	150	51.92	-1	HP	HPrule	Bacteria	Bacteroidetes	Bacteroidia	Marinilabiliales	Marinifilaceae	Marinifilum
DN4298_c0_g1	630	431	15	2.8	DN4298_c0_g1_i1	G143583	G1435831		630	431	15	2.79	100	CDS	630	73.81	1	ATP-dependent Lon protease	KO:K01338	Bacteria	Bacteroidetes	Bacteroidia	Marinilabiliales	Marinifilaceae	Marinifilum
DN43995_c0_g1	1723	1524	76	4	DN43995_c0_g1_i1	G150107	G1501071		1723	1524	76	3.99	100	CDS	1716	61.34	-1	dipeptidase	COG4690	Bacteria	Bacteroidetes	Bacteroidia	Marinilabiliales	Marinifilaceae	Marinifilum
DN44799_c0_g1	593	394	8	1.6	DN44799_c0_g1_i1	G142746	G1427461		593	394	8	1.63	100	CDS	564	60.96	1	dTDP-4-dehydrorhamnose reductase	KO:K00067	Bacteria	Bacteroidetes	Bacteroidia	Marinilabiliales	Marinifilaceae	Marinifilum
DN44975_c0_g1	1149	950	48	4.1	DN44975_c0_g1_i1	G148610	G1486101		1149	950	48	4.05	100	CDS	1092	56.78	1	ABC-type transport system involved in cytochrome c biogenesis permease subunit	COG0755	Bacteria	Bacteroidetes	Bacteroidia	Marinilabiliales	Marinifilaceae	Marinifilum
DN47493_c0_g1	271	73.3	4	4.4	DN47493_c0_g1_i1	G118192	G1181921		271	73.34	4	4.37	100	CDS	270	65.17	1	peptidase C69-like protein	pfam03577	Bacteria	Bacteroidetes	Bacteroidia	Marinilabiliales	Marinifilaceae	Marinifilum
DN4783_c0_g1	402	203	14	5.5	DN4783_c0_g1_i1	G134382	G1343821		402	203	14	5.52	100	CDS	402	59.52	-1	ResB-like family protein	pfam05140	Bacteria	Bacteroidetes	Bacteroidia	Marinilabiliales	Marinifilaceae	Marinifilum
DN123_c0_g1	758	559	15	2.2	DN123_c0_g1_i1	G145702	G1457021		758	559	15	2.15	100	CDS	756	28.67	1	tetratricopeptide (TPR) repeat protein	COG0457	Bacteria	Bacteroidetes	Bacteroidia	Marinilabiliales	Marinifilaceae
DN12932_c0_g1	344	145	7	3.9	DN12932_c0_g1_i1	G129190	G1291901		344	145	7	3.87	100	CDS	342	82.46	-1	PAT family beta-lactamase induction signal transducer AmpG	KO:K08218	Bacteria	Bacteroidetes	Bacteroidia	Marinilabiliales	Marinifilaceae
DN1347_c0_g1	760	561	21	3	DN1347_c0_g1_i1	G145717	G1457171		760	561	21	3	100	CDS	630	69.05	-1	selenocysteine lyase/cysteine desulfurase	COG0520	Bacteria	Bacteroidetes	Bacteroidia	Marinilabiliales	Marinifilaceae
DN14879_c0_g1	202	23.6	4	13.6	DN14879_c0_g1_i1	G100346	G1003461		202	23.55	4	13.6	100	CDS	201	53.73	-1	DUF3098 family protein	pfam11297	Bacteria	Bacteroidetes	Bacteroidia	Marinilabiliales	Marinifilaceae
DN19899_c0_g1	341	142	8	4.5	DN19899_c0_g1_i1	G128871	G1288711		341	142	8	4.51	100	CDS	339	63.48	-1	electron transfer flavoprotein beta subunit	KO:K03521	Bacteria	Bacteroidetes	Bacteroidia	Marinilabiliales	Marinifilaceae
DN22302_c0_g1	358	159	9	4.5	DN22302_c0_g1_i1	G130610	G1306101		358	159	9	4.53	100	CDS	291	36.46	1	molecular chaperone GrpE	KO:K03687	Bacteria	Bacteroidetes	Bacteroidia	Marinilabiliales	Marinifilaceae
DN22359_c0_g1	240	47.7	4	6.7	DN22359_c0_g1_i1	G110820	G1108201		240	47.71	4	6.71	100	CDS	237	59.49	-1	CIC family chloride channel protein	KO:K03281	Bacteria	Bacteroidetes	Bacteroidia	Marinilabiliales	Marinifilaceae
DN23137_c0_g1	415	216	5	1.9	DN23137_c0_g1_i1	G135260	G1352601		415	216	5	1.85	100	CDS	411	50.79	1	signal transduction histidine kinase	COG0642	Bacteria	Bacteroidetes	Bacteroidia	Marinilabiliales	Marinifilaceae
DN23413_c0_g1	218	32.7	5	12.3	DN23413_c0_g1_i1	G104866	G1048661		218	32.65	5	12.26	100	CDS	216	73.61	1	ABC-2 type transport system ATP-binding protein	KO:K01990	Bacteria	Bacteroidetes	Bacteroidia	Marinilabiliales	Marinifilaceae
DN26617_c0_g1	417	218	6	2.2	DN26617_c0_g1_i1	G135404	G1354041		417	218	6	2.2	100	CDS	333	69.52	1	undecaprenyl-diphosphatase	KO:K06153	Bacteria	Bacteroidetes	Bacteroidia	Marinilabiliales	Marinifilaceae
DN26838_c0_g1	335	136	7	4.1	DN26838_c0_g1_i1	G128190	G1281901		335	136	7	4.12	100	CDS	288	67.37	-1	UDP-3-O-[3-hydroxymyristoyl] glucosamine N-acyltransferase	KO:K02536	Bacteria	Bacteroidetes	Bacteroidia	Marinilabiliales	Marinifilaceae
DN26868_c0_g1	325	126	6	3.8	DN26868_c0_g1_i1	G126880	G1268801		325	126	6	3.81	100	CDS	324	29.63	1	HP	HPrule	Bacteria	Bacteroidetes	Bacteroidia	Marinilabiliales	Marinifilaceae
DN30454_c0_g1	496	297	8	2.2	DN30454_c0_g1_i1	G139623	G1396231	1	496	297	8	2.16	100	CDS	384	58.54	1	RNA polymerase sigma-70 factor (ECF subfamily)	KO:K03088	Bacteria	Bacteroidetes	Bacteroidia	Marinilabiliales	Marinifilaceae
DN30454_c0_g1	496	297	8	2.2	DN30454_c0_g1_i1	G139623	G1396232	2	496	297	8	2.16	100	CDS	111	#N/A	1	HP	HPrule	Bacteria	Bacteroidetes	Bacteroidia	Marinilabiliales	Marinifilaceae
DN32171_c0_g1	1278	1079	69	5.1	DN32171_c0_g1_i1	G149102	G1491021		1278	1079	69	5.12	100	CDS	1263	38.52	-1	HP	HPrule	Bacteria	Bacteroidetes	Bacteroidia	Marinilabiliales	Marinifilaceae
DN33326_c0_g1	221	34.5	4	9.3	DN33326_c0_g1_i1	G105762	G1057621		221	34.54	4	9.27	100	CDS	219	76.39	1	enhancing lycopene biosynthesis protein 2	COG3155	Bacteria	Bacteroidetes	Bacteroidia	Marinilabiliales	Marinifilaceae
DN33524_c0_g1	236	44.8	9	16.1	DN33524_c0_g1_i1	G109817	G1098171		236	44.76	9	16.1	100	CDS	234	62.82	-1	enhancing lycopene biosynthesis protein 2	COG3155	Bacteria	Bacteroidetes	Bacteroidia	Marinilabiliales	Marinifilaceae
DN33677_c0_g1	298	99	3	2.4	DN33677_c0_g1_i1	G123076	G1230761	1	298	99	3	2.43	100	CDS	225	72.58	-1	cytochrome c nitrite reductase small subunit	KO:K15876	Bacteria	Bacteroidetes	Bacteroidia	Marinilabiliales	Marinifilaceae
DN33677_c0_g1	298	99	3	2.4	DN33677_c0_g1_i1	G123076	G1230762	2	298	99	3	2.43	100	CDS	90	#N/A	-1	HP	HPrule	Bacteria	Bacteroidetes	Bacteroidia	Marinilabiliales	Marinifilaceae
DN3649_c0_g1	355	156	8	4.1	DN3649_c0_g1_i1	G130349	G1303491		355	156	8	4.11	100	CDS	351	56.9	1	acetyl-CoA C-acetyltransferase/acetyl-CoA acyltransferase	KO:K00626,KO:K00632	Bacteria	Bacteroidetes	Bacteroidia	Marinilabiliales	Marinifilaceae
DN4015_c0_g1	337	138	8	4.6	DN4015_c0_g1_i1	G128453	G1284531		337	138	8	4.64	100	CDS	294	90.12	-1	propionyl-CoA carboxylase beta chain	KO:K01966	Bacteria	Bacteroidetes	Bacteroidia	Marinilabiliales	Marinifilaceae
DN40452_c0_g1	326	127	7	4.4	DN40452_c0_g1_i1	G127062	G1270621		326	127	7	4.41	100	CDS	294	68.37	-1	cytochrome c nitrite reductase small subunit	KO:K15876	Bacteria	Bacteroidetes	Bacteroidia	Marinilabiliales	Marinifilaceae
DN41590_c0_g1	412	213	10	3.8	DN41590_c0_g1_i1	G135093	G1350931		412	213	10	3.76	100	CDS	408	62.5	-1	GH3 auxin-responsive promoter	pfam03321	Bacteria	Bacteroidetes	Bacteroidia	Marinilabiliales	Marinifilaceae
DN43643_c0_g1	249	54.7	5	7.3	DN43643_c0_g1_i1	G113366	G1133661		249	54.65	5	7.33	100	CDS	246	37.04	1	HP	HPrule	Bacteria	Bacteroidetes	Bacteroidia	Marinilabiliales	Marinifilaceae
DN44827_c0_g1	419	220	7	2.6	DN44827_c0_g1_i1	G135541	G1355411		419	220	7	2.55	100	CDS	282	81.72	-1	HP	HPrule	Bacteria	Bacteroidetes	Bacteroidia	Marinilabiliales	Marinifilaceae
DN47614_c0_g1	428	229	10	3.5	DN47614_c0_g1_i1	G136172	G1361721		428	229	10	3.5	100	CDS	426	50	1	CRP/FNR family transcriptional regulator	KO:K01420	Bacteria	Bacteroidetes	Bacteroidia	Marinilabiliales	Marinifilaceae
DN17871_c0_g1	239	47	2	3.4	DN17871_c0_g1_i1	G110519	G1105191	1	239	46.96	2	3.41	100	CDS	141	82.61	1	HP	HPrule	Bacteria	Bacteroidetes	Bacteroidia	Marinilabiliales	Marinilabiliaceae	Alkaliflexus
DN17871_c0_g1	239	47	2	3.4	DN17871_c0_g1_i1	G110519	G1105192	2	239	46.96	2	3.41	100	CDS	99	#N/A	1	HP	HPrule	Bacteria	Bacteroidetes	Bacteroidia	Marinilabiliales	Marinilabiliaceae	Alkaliflexus
DN21232_c0_g1	315	116	4	2.8	DN21232_c0_g1_i1	G125566	G1255661		315	116	4	2.76	100	CDS	312	76	1	aminobenzoyl-glutamate transport protein	KO:K12942	Bacteria	Bacteroidetes	Bacteroidia	Marinilabiliales	Marinilabiliaceae	Alkaliflexus
DN30421_c0_g1	446	247	6	2	DN30421_c0_g1_i1	G137204	G1372041		446	247	6	1.95	100	CDS	444	64.14	1	transglycosylase-like protein with SLT domain	pfam01464	Bacteria	Bacteroidetes	Bacteroidia	Marinilabiliales	Marinilabiliaceae	Alkaliflexus
DN32415_c0_g1	458	259	8	2.5	DN32415_c0_g1_i1	G137863	G1378631		458	259	8	2.47	100	CDS	456	48	-1	uncharacterized membrane protein	COG5505	Bacteria	Bacteroidetes	Bacteroidia	Marinilabiliales	Marinilabiliaceae	Alkaliflexus
DN37648_c0_g1	1417	1218	49	3.2	DN37648_c0_g1_i1	G149520	G1495201		1417	1218	49	3.22	100	CDS	1416	74.79	-1	asparaginyl-tRNA synthetase	KO:K01893	Bacteria	Bacteroidetes	Bacteroidia	Marinilabiliales	Marinilabiliaceae	Alkaliflexus
DN38925_c0_g1	421	222	9	3.3	DN38925_c0_g1_i1	G135679	G1356791		421	222	9	3.25	100	CDS	420	58.7	-1	alpha amylase catalytic subunit	pfam00128	Bacteria	Bacteroidetes	Bacteroidia	Marinilabiliales	Marinilabiliaceae	Alkaliflexus
DN43440_c0_g1	293	94.1	3	2.6	DN43440_c0_g1_i1	G122270	G1222701		293	94.06	3	2.55	100	CDS	291	50	-1	regulator of cell morphogenesis and NO signaling	KO:K07322	Bacteria	Bacteroidetes	Bacteroidia	Marinilabiliales	Marinilabiliaceae	Alkaliflexus
DN48581_c0_g1	232	41.9	3	5.7	DN48581_c0_g1_i1	G108831	G1088311		232	41.9	3	5.73	100	CDS	231	72	1	methionyl aminopeptidase	KO:K01265	Bacteria	Bacteroidetes	Bacteroidia	Marinilabiliales	Marinilabiliaceae	Alkaliflexus
DN49687_c0_g1	221	34.5	3	7	DN49687_c0_g1_i1	G105859	G1058591		221	34.54	3	6.96	100	CDS	219	61.64	1	HP	HPrule	Bacteria	Bacteroidetes	Bacteroidia	Marinilabiliales	Marinilabiliaceae	Alkaliflexus
DN12266_c0_g1	253	57.9	6	8.3	DN12266_c0_g1_i1	G114130	G1141301		253	57.88	6	8.3	100	CDS	252	78.57	1	signal recognition particle subunit SRP54	KO:K03106	Bacteria	Bacteroidetes	Bacteroidia	Marinilabiliales	Marinilabiliaceae	Alkalitalea
DN15545_c0_g1	206	25.7	1	3.1	DN15545_c0_g1_i1	G101438	G1014381		206	25.67	1	3.12	100	CDS	204	53.73	1	HP	HPrule	Bacteria	Bacteroidetes	Bacteroidia	Marinilabiliales	Marinilabiliaceae	Alkalitalea
DN16355_c0_g1	257	61.2	3	3.9	DN16355_c0_g1_i1	G115061	G1150611		257	61.18	3	3.93	100	CDS	255	55.29	-1	NAD+ synthase (glutamine-hydrolysing)	KO:K01950	Bacteria	Bacteroidetes	Bacteroidia	Marinilabiliales	Marinilabiliaceae	Alkalitalea
DN17481_c0_g1	259	62.9	3	3.8	DN17481_c0_g1_i1	G115513	G1155131		259	62.86	3	3.82	100	CDS	222	72.6	-1	peptide chain release factor 3	KO:K02837	Bacteria	Bacteroidetes	Bacteroidia	Marinilabiliales	Marinilabiliaceae	Alkalitalea
DN17863_c0_g1	201	23	4	13.9	DN17863_c0_g1_i1	G100070	G1000701		201	23.03	4	13.91	100	CDS	201	63.24	-1	signal transduction histidine kinase	COG0642	Bacteria	Bacteroidetes	Bacteroidia	Marinilabiliales	Marinilabiliaceae	Alkalitalea
DN19353_c0_g1	590	391	11	2.3	DN19353_c0_g1_i1	G142656	G1426561		590	391	11	2.25	100	CDS	588	62.94	1	tRNA-2-methylthio-N6-dimethylallyladenosine synthase	KO:K06168	Bacteria	Bacteroidetes	Bacteroidia	Marinilabiliales	Marinilabiliaceae	Alkalitalea
DN20142_c0_g1	202	23.6	4	13.6	DN20142_c0_g1_i1	G100375	G1003751		202	23.55	4	13.6	100	CDS	201	64.18	1	HP	HPrule	Bacteria	Bacteroidetes	Bacteroidia	Marinilabiliales	Marinilabiliaceae	Alkalitalea
DN21224_c0_g1	351	152	5	2.6	DN21224_c0_g1_i1	G129901	G1299011		351	152	5	2.63	100	CDS	348	68.1	1	uncharacterized membrane protein	COG3762	Bacteria	Bacteroidetes	Bacteroidia	Marinilabiliales	Marinilabiliaceae	Alkalitalea
DN25719_c0_g1	667	468	15	2.6	DN25719_c0_g1_i1	G144307	G1443071	1	667	468	15	2.57	100	CDS	93	#N/A	-1	HP	HPrule	Bacteria	Bacteroidetes	Bacteroidia	Marinilabiliales	Marinilabiliaceae	Alkalitalea
DN25719_c0_g1	667	468	15	2.6	DN25719_c0_g1_i1	G144307	G1443072	2	667	468	15	2.57	100	CDS	528	93.75	1	Fic family protein	COG3177	Bacteria	Bacteroidetes	Bacteroidia	Marinilabiliales	Marinilabiliaceae	Alkalitalea
DN26992_c0_g1	208	26.8	4	12	DN26992_c0_g1_i1	G102072	G1020721		208	26.77	4	11.96	100	CDS	207	74.14	-1	HP	HPrule	Bacteria	Bacteroidetes	Bacteroidia	Marinilabiliales	Marinilabiliaceae	Alkalitalea
DN27868_c0_g1	247	53.1	3	4.5	DN27868_c0_g1_i1	G112739	G1127391		247	53.07	3	4.53	100	CDS	246	36.59	1	HP	HPrule	Bacteria	Bacteroidetes	Bacteroidia	Marinilabiliales	Marinilabiliaceae	Alkalitalea
DN31484_c0_g1	549	350	8	1.8	DN31484_c0_g1_i1	G141486	G1414861		549	350	8	1.83	100	CDS	546	51.65	1	HP	HPrule	Bacteria	Bacteroidetes	Bacteroidia	Marinilabiliales	Marinilabiliaceae	Alkalitalea
DN4280_c0_g1	504	305	25	6.6	DN4280_c0_g1_i1	G139973	G1399731		504	305	25	6.56	100	CDS	390	54.55	-1	uncharacterized protein DUF3276	pfam11680	Bacteria	Bacteroidetes	Bacteroidia	Marinilabiliales	Marinilabiliaceae	Alkalitalea
DN43337_c0_g1	245	51.5	3	4.7	DN43337_c0_g1_i1	G112338	G1123381		245	51.51	3	4.66	100	CDS	243	65	1	peptidyl-dipeptidase Dcp	KO:K01284	Bacteria	Bacteroidetes	Bacteroidia	Marinilabiliales	Marinilabiliaceae	Alkalitalea
DN44788_c0_g1	212	29.1	3	8.3	DN44788_c0_g1_i1	G103294	G1032941		212	29.05	3	8.27	100	CDS	210	47.3	1	HP	HPrule	Bacteria	Bacteroidetes	Bacteroidia	Marinilabiliales	Marinilabiliaceae	Alkalitalea
DN46020_c0_g1	872	673	20	2.4	DN46020_c0_g1_i1	G146900	G1469001		872	673	20	2.38	100	CDS	870	32.4	1	tetratricopeptide (TPR) repeat protein	COG0457	Bacteria	Bacteroidetes	Bacteroidia	Marinilabiliales	Marinilabiliaceae	Alkalitalea
DN47404_c0_g1	375	176	13	5.9	DN47404_c0_g1_i1	G132224	G1322241		375	176	13	5.91	100	CDS	375	47.75	1	butyrate kinase	KO:K00929	Bacteria	Bacteroidetes	Bacteroidia	Marinilabiliales	Marinilabiliaceae	Alkalitalea
DN49454_c0_g1	212	29.1	4	11	DN49454_c0_g1_i1	G103320	G1033201		212	29.05	4	11.03	100	CDS	210	59.46	-1	HP	HPrule	Bacteria	Bacteroidetes	Bacteroidia	Marinilabiliales	Marinilabiliaceae	Alkalitalea
DN19973_c0_g1	252	57.1	5	7	DN19973_c0_g1_i1	G113967	G1139671		252	57.06	5	7.02	100	CDS	207	50	1	DNA polymerase-3 subunit delta	KO:K02340	Bacteria	Bacteroidetes	Bacteroidia	Marinilabiliales	Marinilabiliaceae	Anaerophaga
DN21164_c0_g1	453	254	8	2.5	DN21164_c0_g1_i1	G137588	G1375881		453	254	8	2.52	100	CDS	378	72.22	1	adenylosuccinate synthase	KO:K01939	Bacteria	Bacteroidetes	Bacteroidia	Marinilabiliales	Marinilabiliaceae	Anaerophaga
DN22416_c0_g1	344	145	6	3.3	DN22416_c0_g1_i1	G129207	G1292071		344	145	6	3.31	100	CDS	342	66.67	-1	RNA polymerase sigma-70 factor (ECF subfamily)	KO:K03088	Bacteria	Bacteroidetes	Bacteroidia	Marinilabiliales	Marinilabiliaceae	Anaerophaga
DN22594_c0_g1	210	27.9	4	11.5	DN22594_c0_g1_i1	G102613	G1026131		210	27.9	4	11.48	100	CDS	177	86.44	1	type I restriction enzyme R subunit	KO:K01153	Bacteria	Bacteroidetes	Bacteroidia	Marinilabiliales	Marinilabiliaceae	Anaerophaga
DN23191_c0_g1	224	36.5	6	13.2	DN23191_c0_g1_i1	G106552	G1065521		224	36.47	6	13.17	100	CDS	222	70.42	-1	phosphoenolpyruvate carboxykinase (ATP)	KO:K01610	Bacteria	Bacteroidetes	Bacteroidia	Marinilabiliales	Marinilabiliaceae	Anaerophaga
DN25276_c0_g1	1118	919	19	1.7	DN25276_c0_g1_i1	G148478	G1484781		1118	919	19	1.66	100	CDS	1116	83.87	1	phosphoenolpyruvate carboxykinase (ATP)	KO:K01610	Bacteria	Bacteroidetes	Bacteroidia	Marinilabiliales	Marinilabiliaceae	Anaerophaga
DN29814_c0_g1	217	32	3	7.5	DN29814_c0_g1_i1	G104609	G1046091		217	32.04	3	7.5	100	CDS	213	78.87	-1	NSS family neurotransmitter:Na+ symporter	KO:K03308	Bacteria	Bacteroidetes	Bacteroidia	Marinilabiliales	Marinilabiliaceae	Anaerophaga
DN30487_c0_g1	456	257	14	4.4	DN30487_c0_g1_i1	G137729	G1377291		456	257	14	4.36	100	CDS	375	62.9	-1	F-type H+-transporting ATPase subunit alpha	KO:K02111	Bacteria	Bacteroidetes	Bacteroidia	Marinilabiliales	Marinilabiliaceae	Anaerophaga
DN30577_c0_g1	299	100	6	4.8	DN30577_c0_g1_i1	G123219	G1232191		299	100	6	4.8	100	CDS	297	56.67	1	uncharacterized protein	KO:K06872	Bacteria	Bacteroidetes	Bacteroidia	Marinilabiliales	Marinilabiliaceae	Anaerophaga
DN33808_c0_g1	769	570	48	6.7	DN33808_c0_g1_i1	G145835	G1458351		769	570	48	6.74	100	CDS	690	63.13	1	Fe-Mn family superoxide dismutase	KO:K04564	Bacteria	Bacteroidetes	Bacteroidia	Marinilabiliales	Marinilabiliaceae	Anaerophaga
DN36198_c0_g1	287	88.2	8	7.3	DN36198_c0_g1_i1	G121189	G1211891		287	88.24	8	7.26	100	CDS	159	100	1	type I restriction enzyme R subunit	KO:K01153	Bacteria	Bacteroidetes	Bacteroidia	Marinilabiliales	Marinilabiliaceae	Anaerophaga
DN36485_c0_g1	232	41.9	3	5.7	DN36485_c0_g1_i1	G108777	G1087771		232	41.9	3	5.73	100	CDS	231	42.42	1	HP	HPrule	Bacteria	Bacteroidetes	Bacteroidia	Marinilabiliales	Marinilabiliaceae	Anaerophaga
DN37870_c0_g1	357	158	5	2.5	DN37870_c0_g1_i1	G130537	G1305371		357	158	5	2.53	100	CDS	354	56.03	1	HP	KO:K07027	Bacteria	Bacteroidetes	Bacteroidia	Marinilabiliales	Marinilabiliaceae	Anaerophaga
DN38628_c0_g1	223	35.8	4	8.9	DN38628_c0_g1_i1	G106374	G1063741		223	35.82	4	8.94	100	CDS	222	74.32	1	aminobenzoyl-glutamate transport protein	KO:K12942	Bacteria	Bacteroidetes	Bacteroidia	Marinilabiliales	Marinilabiliaceae	Anaerophaga
DN38867_c0_g1	438	239	14	4.7	DN38867_c0_g1_i1	G136802	G1368021		438	239	14	4.69	100	CDS	438	57.14	1	nicotinate-nucleotide pyrophosphorylase (carboxylating)	KO:K00767	Bacteria	Bacteroidetes	Bacteroidia	Marinilabiliales	Marinilabiliaceae	Anaerophaga
DN39488_c0_g1	958	759	19	2	DN39488_c0_g1_i1	G147558	G1475581		958	759	19	2	100	CDS	954	67.29	-1	dipeptidyl aminopeptidase/acylaminoacyl peptidase	COG1506	Bacteria	Bacteroidetes	Bacteroidia	Marinilabiliales	Marinilabiliaceae	Anaerophaga
DN40046_c0_g1	298	99	6	4.9	DN40046_c0_g1_i1	G123092	G1230921		298	99	6	4.85	100	CDS	213	77.46	-1	HP	KO:K09700	Bacteria	Bacteroidetes	Bacteroidia	Marinilabiliales	Marinilabiliaceae	Anaerophaga
DN41217_c0_g1	351	152	5	2.6	DN41217_c0_g1_i1	G129958	G1299581		351	152	5	2.63	100	CDS	351	94.02	1	type I restriction enzyme M protein	KO:K03427	Bacteria	Bacteroidetes	Bacteroidia	Marinilabiliales	Marinilabiliaceae	Anaerophaga
DN43170_c0_g1	339	140	4	2.3	DN43170_c0_g1_i1	G128689	G1286891		339	140	4	2.29	100	CDS	336	98.21	1	type I restriction enzyme R subunit	KO:K01153	Bacteria	Bacteroidetes	Bacteroidia	Marinilabiliales	Marinilabiliaceae	Anaerophaga
DN43239_c0_g1	225	37.1	3	6.5	DN43239_c0_g1_i1	G106931	G1069311		225	37.13	3	6.47	100	CDS	159	82.69	-1	ABC-2 type transport system permease protein	KO:K01992	Bacteria	Bacteroidetes	Bacteroidia	Marinilabiliales	Marinilabiliaceae	Anaerophaga
DN46518_c0_g1	272	74.2	5	5.4	DN46518_c0_g1_i1	G118370	G1183701		272	74.24	5	5.39	100	CDS	243	88.31	1	oxaloacetate decarboxylase beta subunit	KO:K01572	Bacteria	Bacteroidetes	Bacteroidia	Marinilabiliales	Marinilabiliaceae	Anaerophaga
DN36326_c0_g1	310	111	5	3.6	DN36326_c0_g1_i1	G124913	G1249131		310	111	5	3.61	100	CDS	306	70.53	1	nitrite reductase (cytochrome c-552)	KO:K03385	Bacteria	Bacteroidetes	Bacteroidia	Marinilabiliales	Marinilabiliaceae	Geofilum
DN12033_c0_g1	579	380	10	2.1	DN12033_c0_g1_i1	G142358	G1423581		579	380	10	2.11	100	CDS	576	60.42	1	long-chain acyl-CoA synthetase	KO:K01897	Bacteria	Bacteroidetes	Bacteroidia	Marinilabiliales	Marinilabiliaceae	Marinilabilia
DN12287_c0_g1	784	585	32	4.4	DN12287_c0_g1_i1	G145987	G1459871		784	585	32	4.38	100	CDS	783	33.21	1	translation initiation factor IF-2	KO:K02519	Bacteria	Bacteroidetes	Bacteroidia	Marinilabiliales	Marinilabiliaceae	Marinilabilia
DN13996_c0_g1	231	41.2	4	7.8	DN13996_c0_g1_i1	G108393	G1083931		231	41.21	4	7.77	100	CDS	144	56.52	-1	HP	KO:K00936	Bacteria	Bacteroidetes	Bacteroidia	Marinilabiliales	Marinilabiliaceae	Marinilabilia
DN14651_c0_g1	262	65.4	4	4.9	DN14651_c0_g1_i1	G116149	G1161491		262	65.42	4	4.9	100	CDS	261	60	-1	N-acetylmuramoyl-L-alanine amidase	KO:K01448	Bacteria	Bacteroidetes	Bacteroidia	Marinilabiliales	Marinilabiliaceae	Marinilabilia
DN14966_c0_g1	270	72.4	6	6.6	DN14966_c0_g1_i1	G117862	G1178621		270	72.44	6	6.63	100	CDS	231	63.64	-1	PD-(D/E)XK nuclease superfamily protein	pfam13366	Bacteria	Bacteroidetes	Bacteroidia	Marinilabiliales	Marinilabiliaceae	Marinilabilia
DN16582_c0_g1	328	129	6	3.7	DN16582_c0_g1_i1	G127254	G1272541		328	129	6	3.72	100	CDS	324	75	-1	type III restriction enzyme	KO:K01156	Bacteria	Bacteroidetes	Bacteroidia	Marinilabiliales	Marinilabiliaceae	Marinilabilia
DN16784_c0_g1	272	74.2	3	3.2	DN16784_c0_g1_i1	G118265	G1182651		272	74.24	3	3.24	100	CDS	270	39.13	1	HP	HPrule	Bacteria	Bacteroidetes	Bacteroidia	Marinilabiliales	Marinilabiliaceae	Marinilabilia
DN18326_c0_g1	297	98	3	2.5	DN18326_c0_g1_i1	G122863	G1228631		297	98.01	3	2.45	100	CDS	294	78.26	1	type III restriction enzyme	KO:K01156	Bacteria	Bacteroidetes	Bacteroidia	Marinilabiliales	Marinilabiliaceae	Marinilabilia
DN18986_c0_g1	380	181	17	7.5	DN18986_c0_g1_i1	G132628	G1326281		380	181	17	7.52	100	CDS	369	66.93	-1	glycosidase	COG0366	Bacteria	Bacteroidetes	Bacteroidia	Marinilabiliales	Marinilabiliaceae	Marinilabilia
DN20050_c0_g1	320	121	8	5.3	DN20050_c0_g1_i1	G126214	G1262141		320	121	8	5.29	100	CDS	318	83.02	1	ornithine--oxo-acid transaminase	KO:K00819	Bacteria	Bacteroidetes	Bacteroidia	Marinilabiliales	Marinilabiliaceae	Marinilabilia
DN20801_c0_g1	291	92.1	5	4.4	DN20801_c0_g1_i1	G121826	G1218261		291	92.11	5	4.35	100	CDS	288	67.02	1	aminobenzoyl-glutamate transport protein	KO:K12942	Bacteria	Bacteroidetes	Bacteroidia	Marinilabiliales	Marinilabiliaceae	Marinilabilia
DN21663_c0_g1	380	181	11	4.9	DN21663_c0_g1_i1	G132632	G1326321		380	181	11	4.87	100	CDS	378	70.63	1	cysteate synthase	KO:K15527	Bacteria	Bacteroidetes	Bacteroidia	Marinilabiliales	Marinilabiliaceae	Marinilabilia
DN23626_c0_g1	203	24.1	3	10	DN23626_c0_g1_i1	G100649	G1006491		203	24.07	3	9.98	100	CDS	201	56.72	-1	HP	HPrule	Bacteria	Bacteroidetes	Bacteroidia	Marinilabiliales	Marinilabiliaceae	Marinilabilia
DN28426_c0_g1	265	68	4	4.7	DN28426_c0_g1_i1	G116876	G1168761		265	68.02	4	4.71	100	CDS	216	67.16	-1	uncharacterized protein DUF3800	pfam12686	Bacteria	Bacteroidetes	Bacteroidia	Marinilabiliales	Marinilabiliaceae	Marinilabilia
DN29580_c0_g1	275	77	4	4.2	DN29580_c0_g1_i1	G118886	G1188861		275	76.97	4	4.16	100	CDS	273	50.72	-1	HP	HPrule	Bacteria	Bacteroidetes	Bacteroidia	Marinilabiliales	Marinilabiliaceae	Marinilabilia
DN29662_c0_g1	270	72.4	3	3.3	DN29662_c0_g1_i1	G117916	G1179161		270	72.44	3	3.32	100	CDS	216	78.26	1	DNA repair protein RadC	KO:K03630	Bacteria	Bacteroidetes	Bacteroidia	Marinilabiliales	Marinilabiliaceae	Marinilabilia
DN30797_c0_g1	681	482	18	3	DN30797_c0_g1_i1	G144543	G1445431		681	482	18	2.99	100	CDS	576	62.3	-1	HP	HPrule	Bacteria	Bacteroidetes	Bacteroidia	Marinilabiliales	Marinilabiliaceae	Marinilabilia
DN33654_c0_g1	253	57.9	4	5.5	DN33654_c0_g1_i1	G114239	G1142391		253	57.88	4	5.53	100	CDS	201	54.69	1	HP	HPrule	Bacteria	Bacteroidetes	Bacteroidia	Marinilabiliales	Marinilabiliaceae	Marinilabilia
DN33959_c0_g1	220	33.9	3	7.1	DN33959_c0_g1_i1	G105507	G1055071		220	33.9	3	7.09	100	CDS	219	47.76	-1	HP	HPrule	Bacteria	Bacteroidetes	Bacteroidia	Marinilabiliales	Marinilabiliaceae	Marinilabilia
DN34032_c0_g1	232	41.9	6	11.5	DN34032_c0_g1_i1	G108766	G1087661		232	41.9	6	11.47	100	CDS	228	44.44	1	HP	HPrule	Bacteria	Bacteroidetes	Bacteroidia	Marinilabiliales	Marinilabiliaceae	Marinilabilia
DN34312_c0_g1	277	78.8	3	3.1	DN34312_c0_g1_i1	G119287	G1192871		277	78.81	3	3.05	100	CDS	204	70.59	1	aspartate carbamoyltransferase catalytic subunit	KO:K00609	Bacteria	Bacteroidetes	Bacteroidia	Marinilabiliales	Marinilabiliaceae	Marinilabilia
DN34569_c0_g1	441	242	7	2.3	DN34569_c0_g1_i1	G136950	G1369501		441	242	7	2.32	100	CDS	363	61.98	-1	HP	HPrule	Bacteria	Bacteroidetes	Bacteroidia	Marinilabiliales	Marinilabiliaceae	Marinilabilia
DN34799_c0_g1	247	53.1	7	10.6	DN34799_c0_g1_i1	G112780	G1127801		247	53.07	7	10.56	100	CDS	246	46.15	-1	mevalonate kinase	COG1577	Bacteria	Bacteroidetes	Bacteroidia	Marinilabiliales	Marinilabiliaceae	Marinilabilia
DN34839_c0_g1	288	89.2	4	3.6	DN34839_c0_g1_i1	G121350	G1213501		288	89.2	4	3.59	100	CDS	285	52.33	1	multidrug efflux pump subunit AcrB	COG0841	Bacteria	Bacteroidetes	Bacteroidia	Marinilabiliales	Marinilabiliaceae	Marinilabilia
DN35809_c0_g1	353	154	6	3.1	DN35809_c0_g1_i1	G130137	G1301371		353	154	6	3.12	100	CDS	270	62.82	-1	RNA polymerase sigma-70 factor (ECF subfamily)	KO:K03088	Bacteria	Bacteroidetes	Bacteroidia	Marinilabiliales	Marinilabiliaceae	Marinilabilia
DN37042_c0_g1	1180	981	55	4.5	DN37042_c0_g1_i1	G148712	G1487121		1180	981	55	4.49	100	CDS	1122	57.07	-1	cysteine desulfurase/selenocysteine lyase	KO:K11717	Bacteria	Bacteroidetes	Bacteroidia	Marinilabiliales	Marinilabiliaceae	Marinilabilia
DN37137_c0_g1	454	255	10	3.1	DN37137_c0_g1_i1	G137639	G1376391	1	454	255	10	3.14	100	CDS	102	#N/A	-1	HP	HPrule	Bacteria	Bacteroidetes	Bacteroidia	Marinilabiliales	Marinilabiliaceae	Marinilabilia
DN37137_c0_g1	454	255	10	3.1	DN37137_c0_g1_i1	G137639	G1376392	2	454	255	10	3.14	100	CDS	342	56.25	1	HP	HPrule	Bacteria	Bacteroidetes	Bacteroidia	Marinilabiliales	Marinilabiliaceae	Marinilabilia
DN37244_c0_g1	3165	2966	156	4.2	DN37244_c0_g1_i1	G151004	G1510041		3165	2966	156	4.21	100	CDS	3162	56.02	1	outer membrane receptor for ferrienterochelin and colicin	COG4771	Bacteria	Bacteroidetes	Bacteroidia	Marinilabiliales	Marinilabiliaceae	Marinilabilia
DN39457_c0_g1	374	175	5	2.3	DN39457_c0_g1_i1	G132128	G1321281		374	175	5	2.29	100	CDS	372	78.05	-1	pyruvate-ferredoxin/flavodoxin oxidoreductase	KO:K03737	Bacteria	Bacteroidetes	Bacteroidia	Marinilabiliales	Marinilabiliaceae	Marinilabilia
DN40043_c0_g1	284	85.4	3	2.8	DN40043_c0_g1_i1	G120672	G1206721		284	85.37	3	2.81	100	CDS	282	53.76	1	UPF0755 protein	KO:K07082	Bacteria	Bacteroidetes	Bacteroidia	Marinilabiliales	Marinilabiliaceae	Marinilabilia
DN40784_c0_g1	321	122	5	3.3	DN40784_c0_g1_i1	G126386	G1263861		321	122	5	3.28	100	CDS	318	72.38	1	L-aspartate oxidase	KO:K00278	Bacteria	Bacteroidetes	Bacteroidia	Marinilabiliales	Marinilabiliaceae	Marinilabilia
DN41010_c0_g1	361	162	10	4.9	DN41010_c0_g1_i1	G130943	G1309431		361	162	10	4.94	100	CDS	351	74.56	1	aminobenzoyl-glutamate transport protein	KO:K12942	Bacteria	Bacteroidetes	Bacteroidia	Marinilabiliales	Marinilabiliaceae	Marinilabilia
DN41919_c0_g1	264	67.2	4	4.8	DN41919_c0_g1_i1	G116705	G1167051		264	67.15	4	4.77	100	CDS	249	94.81	1	Fic family protein	COG3177	Bacteria	Bacteroidetes	Bacteroidia	Marinilabiliales	Marinilabiliaceae	Marinilabilia
DN46123_c0_g1	508	309	10	2.6	DN46123_c0_g1_i1	G140125	G1401251		508	309	10	2.59	100	CDS	489	76.4	1	dipeptidyl aminopeptidase/acylaminoacyl peptidase	COG1506	Bacteria	Bacteroidetes	Bacteroidia	Marinilabiliales	Marinilabiliaceae	Marinilabilia
DN47470_c0_g1	270	72.4	5	5.5	DN47470_c0_g1_i1	G117988	G1179881		270	72.44	5	5.53	100	CDS	240	52.38	-1	membrane-bound lytic murein transglycosylase D	KO:K08307	Bacteria	Bacteroidetes	Bacteroidia	Marinilabiliales	Marinilabiliaceae	Marinilabilia
DN5721_c0_g1	738	539	33	4.9	DN5721_c0_g1_i2	G145445	G1454451		738	539	33	4.9	100	CDS	735	77.46	1	succinate dehydrogenase / fumarate reductase flavoprotein subunit	KO:K00239	Bacteria	Bacteroidetes	Bacteroidia	Marinilabiliales	Marinilabiliaceae	Marinilabilia
DN10164_c0_g1	936	737	54	5.9	DN10164_c0_g1_i1	G147396	G1473961		936	737	54	5.87	100	CDS	891	76.77	1	HP	HPrule	Bacteria	Bacteroidetes	Bacteroidia	Marinilabiliales	Marinilabiliaceae	Saccharicrinis
DN10164_c1_g1	323	124	8	5.2	DN10164_c1_g1_i1	G126551	G1265511		323	124	8	5.17	100	CDS	315	80.77	-1	HP	HPrule	Bacteria	Bacteroidetes	Bacteroidia	Marinilabiliales	Marinilabiliaceae	Saccharicrinis
DN13921_c0_g1	244	50.7	4	6.3	DN13921_c0_g1_i1	G111864	G1118641		244	50.74	4	6.31	100	CDS	243	87.65	1	starvation-inducible DNA-binding protein	KO:K04047	Bacteria	Bacteroidetes	Bacteroidia	Marinilabiliales	Marinilabiliaceae	Saccharicrinis
DN17360_c0_g1	884	685	46	5.4	DN17360_c0_g1_i1	G147004	G1470041		884	685	46	5.38	100	CDS	846	79.78	-1	enoyl-[acyl-carrier protein] reductase I	KO:K00208	Bacteria	Bacteroidetes	Bacteroidia	Marinilabiliales	Marinilabiliaceae	Saccharicrinis
DN18676_c0_g1	270	72.4	4	4.4	DN18676_c0_g1_i1	G117877	G1178771		270	72.44	4	4.42	100	CDS	267	79.78	-1	LemA protein	KO:K03744	Bacteria	Bacteroidetes	Bacteroidia	Marinilabiliales	Marinilabiliaceae	Saccharicrinis
DN18680_c0_g1	313	114	7	4.9	DN18680_c0_g1_i1	G125280	G1252801		313	114	7	4.92	100	CDS	279	64.52	-1	dipeptidase	COG4690	Bacteria	Bacteroidetes	Bacteroidia	Marinilabiliales	Marinilabiliaceae	Saccharicrinis
DN21093_c0_g1	315	116	4	2.8	DN21093_c0_g1_i1	G125565	G1255651		315	116	4	2.76	100	CDS	315	60.95	-1	multidrug efflux pump subunit AcrA (membrane-fusion protein)	COG0845	Bacteria	Bacteroidetes	Bacteroidia	Marinilabiliales	Marinilabiliaceae	Saccharicrinis
DN24096_c0_g1	367	168	7	3.3	DN24096_c0_g1_i1	G131466	G1314661		367	168	7	3.34	100	CDS	306	41.84	-1	thioredoxin-like protein	pfam13905	Bacteria	Bacteroidetes	Bacteroidia	Marinilabiliales	Marinilabiliaceae	Saccharicrinis
DN25372_c0_g1	319	120	5	3.3	DN25372_c0_g1_i1	G126104	G1261041		319	120	5	3.34	100	CDS	315	61.05	-1	HP	HPrule	Bacteria	Bacteroidetes	Bacteroidia	Marinilabiliales	Marinilabiliaceae	Saccharicrinis
DN29765_c0_g1	275	77	4	4.2	DN29765_c0_g1_i1	G118889	G1188891		275	76.97	4	4.16	100	CDS	273	87.91	1	HP	KO:K07075	Bacteria	Bacteroidetes	Bacteroidia	Marinilabiliales	Marinilabiliaceae	Saccharicrinis
DN29831_c0_g1	202	23.6	5	17	DN29831_c0_g1_i1	G100425	G1004251		202	23.55	5	17	100	CDS	201	70.77	-1	HP	HPrule	Bacteria	Bacteroidetes	Bacteroidia	Marinilabiliales	Marinilabiliaceae	Saccharicrinis
DN30256_c0_g1	207	26.2	3	9.2	DN30256_c0_g1_i1	G101806	G1018061		207	26.22	3	9.16	100	CDS	204	85.07	1	HP	KO:K07075	Bacteria	Bacteroidetes	Bacteroidia	Marinilabiliales	Marinilabiliaceae	Saccharicrinis
DN31447_c0_g1	349	150	12	6.4	DN31447_c0_g1_i1	G129710	G1297101		349	150	12	6.41	100	CDS	348	40.38	1	nitrite reductase (NADH) large subunit	KO:K00362	Bacteria	Bacteroidetes	Bacteroidia	Marinilabiliales	Marinilabiliaceae	Saccharicrinis
DN31553_c0_g1	383	184	5	2.2	DN31553_c0_g1_i1	G132893	G1328931		383	184	5	2.18	100	CDS	381	91.34	1	starvation-inducible DNA-binding protein	KO:K04047	Bacteria	Bacteroidetes	Bacteroidia	Marinilabiliales	Marinilabiliaceae	Saccharicrinis
DN34275_c0_g1	217	32	3	7.5	DN34275_c0_g1_i1	G104630	G1046301		217	32.04	3	7.5	100	CDS	216	60.29	1	nitrite reductase (NADH) large subunit	KO:K00362	Bacteria	Bacteroidetes	Bacteroidia	Marinilabiliales	Marinilabiliaceae	Saccharicrinis
DN35940_c0_g1	228	39.1	5	10.2	DN35940_c0_g1_i1	G107718	G1077181		228	39.14	5	10.23	100	CDS	222	77.78	1	HP	KO:K07112	Bacteria	Bacteroidetes	Bacteroidia	Marinilabiliales	Marinilabiliaceae	Saccharicrinis
DN37078_c0_g1	1196	997	34	2.7	DN37078_c0_g1_i1	G148779	G1487791		1196	997	34	2.73	100	CDS	1194	67.09	1	HP	HPrule	Bacteria	Bacteroidetes	Bacteroidia	Marinilabiliales	Marinilabiliaceae	Saccharicrinis
DN3997_c0_g1	319	120	21	14	DN3997_c0_g1_i1	G126144	G1261441		319	120	21	14.01	100	CDS	318	71.15	-1	thioredoxin 1	KO:K03671	Bacteria	Bacteroidetes	Bacteroidia	Marinilabiliales	Marinilabiliaceae	Saccharicrinis
DN41380_c0_g1	210	27.9	3	8.6	DN41380_c0_g1_i1	G102713	G1027131		210	27.9	3	8.61	100	CDS	189	78.95	-1	aspartyl-tRNA synthetase	KO:K01876	Bacteria	Bacteroidetes	Bacteroidia	Marinilabiliales	Marinilabiliaceae	Saccharicrinis
DN41634_c0_g1	310	111	8	5.8	DN41634_c0_g1_i1	G124936	G1249361		310	111	8	5.77	100	CDS	309	55.56	1	NAD(P)H-flavin reductase	COG0543	Bacteria	Bacteroidetes	Bacteroidia	Marinilabiliales	Marinilabiliaceae	Saccharicrinis
DN48622_c0_g1	283	84.4	4	3.8	DN48622_c0_g1_i1	G120526	G1205261		283	84.42	4	3.79	100	CDS	282	32.05	-1	HP	HPrule	Bacteria	Bacteroidetes	Bacteroidia	Marinilabiliales	Marinilabiliaceae	Saccharicrinis
DN49081_c0_g1	274	76.1	3	3.2	DN49081_c0_g1_i1	G118770	G1187701		274	76.06	3	3.16	100	CDS	273	52.75	-1	diacylglycerol kinase family enzyme	COG1597	Bacteria	Bacteroidetes	Bacteroidia	Marinilabiliales	Marinilabiliaceae	Saccharicrinis
DN12094_c0_g1	1417	1218	32	2.1	DN12094_c0_g1_i1	G149518	G1495181		1417	1218	32	2.1	100	CDS	1416	74.1	1	lysyl-tRNA synthetase class 2	KO:K04567	Bacteria	Bacteroidetes	Bacteroidia	Marinilabiliales	Marinilabiliaceae	Thermophagus
DN13022_c0_g1	218	32.7	5	12.3	DN13022_c0_g1_i1	G104805	G1048051		218	32.65	5	12.26	100	CDS	216	36.76	-1	outer membrane protein	KO:K12340	Bacteria	Bacteroidetes	Bacteroidia	Marinilabiliales	Marinilabiliaceae	Thermophagus
DN17294_c0_g1	756	557	24	3.5	DN17294_c0_g1_i1	G145674	G1456741		756	557	24	3.45	100	CDS	723	56.25	-1	peptidase S46-like protein	pfam10459	Bacteria	Bacteroidetes	Bacteroidia	Marinilabiliales	Marinilabiliaceae	Thermophagus
DN19302_c0_g1	258	62	4	5.2	DN19302_c0_g1_i1	G115287	G1152871		258	62.02	4	5.16	100	CDS	255	76.47	1	NAD+ synthase (glutamine-hydrolysing)	KO:K01950	Bacteria	Bacteroidetes	Bacteroidia	Marinilabiliales	Marinilabiliaceae	Thermophagus
DN22779_c0_g1	231	41.2	5	9.7	DN22779_c0_g1_i1	G108449	G1084491		231	41.21	5	9.72	100	CDS	231	81.82	-1	topoisomerase-4 subunit B	KO:K02622	Bacteria	Bacteroidetes	Bacteroidia	Marinilabiliales	Marinilabiliaceae	Thermophagus
DN29512_c0_g1	208	26.8	2	6	DN29512_c0_g1_i1	G102099	G1020991		208	26.77	2	5.98	100	CDS	204	74.63	-1	phosphoribosylaminoimidazolecarboxamide formyltransferase/IMP cyclohydrolase	KO:K00602	Bacteria	Bacteroidetes	Bacteroidia	Marinilabiliales	Marinilabiliaceae	Thermophagus
DN13446_c0_g1	309	110	5	3.6	DN13446_c0_g1_i1	G124683	G1246831		309	110	5	3.64	100	CDS	306	73.27	-1	magnesium chelatase family protein	KO:K07391	Bacteria	Bacteroidetes	Bacteroidia	Marinilabiliales	Prolixibacteraceae	Draconibacterium
DN13521_c0_g1	300	101	5	4	DN13521_c0_g1_i1	G123327	G1233271		300	101	5	3.96	100	CDS	297	45.83	1	HP	HPrule	Bacteria	Bacteroidetes	Bacteroidia	Marinilabiliales	Prolixibacteraceae	Draconibacterium
DN13547_c0_g1	208	26.8	7	20.9	DN13547_c0_g1_i1	G101994	G1019941		208	26.77	7	20.94	100	CDS	207	51.56	1	ferredoxin--NADP+ reductase/benzoate/toluate 1,2-dioxygenase reductase subunit	KO:K00528,KO:K05784	Bacteria	Bacteroidetes	Bacteroidia	Marinilabiliales	Prolixibacteraceae	Draconibacterium
DN15968_c0_g1	223	35.8	2	4.5	DN15968_c0_g1_i1	G106242	G1062421		223	35.82	2	4.47	100	CDS	219	68.66	1	HP	KO:K00936	Bacteria	Bacteroidetes	Bacteroidia	Marinilabiliales	Prolixibacteraceae	Draconibacterium
DN162_c0_g1	1471	1272	215	13.5	DN162_c0_g1_i1	G149654	G1496541		1471	1272	215	13.53	100	CDS	1365	78.41	1	acetylornithine deacetylase/succinyl-diaminopimelate desuccinylase-like protein	COG0624	Bacteria	Bacteroidetes	Bacteroidia	Marinilabiliales	Prolixibacteraceae	Draconibacterium
DN1872_c0_g1	457	258	47	14.6	DN1872_c0_g1_i1	G137781	G1377811		457	258	47	14.59	100	CDS	192	76.19	-1	CspA family cold shock protein	KO:K03704	Bacteria	Bacteroidetes	Bacteroidia	Marinilabiliales	Prolixibacteraceae	Draconibacterium
DN20509_c0_g1	249	54.7	3	4.4	DN20509_c0_g1_i1	G113227	G1132271		249	54.65	3	4.4	100	CDS	246	72.84	1	3-oxoadipate CoA-transferase alpha subunit	KO:K01031	Bacteria	Bacteroidetes	Bacteroidia	Marinilabiliales	Prolixibacteraceae	Draconibacterium
DN21825_c0_g1	207	26.2	3	9.2	DN21825_c0_g1_i1	G101759	G1017591		207	26.22	3	9.16	100	CDS	204	62.12	1	PAT family beta-lactamase induction signal transducer AmpG	KO:K08218	Bacteria	Bacteroidetes	Bacteroidia	Marinilabiliales	Prolixibacteraceae	Draconibacterium
DN22997_c0_g1	227	38.5	3	6.3	DN22997_c0_g1_i1	G107353	G1073531		227	38.47	3	6.25	100	CDS	195	70.59	1	putative alpha-1,2-mannosidase	COG3537	Bacteria	Bacteroidetes	Bacteroidia	Marinilabiliales	Prolixibacteraceae	Draconibacterium
DN24932_c0_g1	721	522	15	2.3	DN24932_c0_g1_i1	G145179	G1451791		721	522	15	2.3	100	CDS	720	50.42	1	HP	KO:K07112	Bacteria	Bacteroidetes	Bacteroidia	Marinilabiliales	Prolixibacteraceae	Draconibacterium
DN25645_c0_g1	382	183	4	1.8	DN25645_c0_g1_i1	G132792	G1327921		382	183	4	1.75	100	CDS	321	48	-1	putative transcriptional regulator	KO:K07735	Bacteria	Bacteroidetes	Bacteroidia	Marinilabiliales	Prolixibacteraceae	Draconibacterium
DN25759_c0_g1	420	221	8	2.9	DN25759_c0_g1_i1	G135588	G1355881		420	221	8	2.9	100	CDS	417	37.41	1	membrane-bound lytic murein transglycosylase F	KO:K18691	Bacteria	Bacteroidetes	Bacteroidia	Marinilabiliales	Prolixibacteraceae	Draconibacterium
DN25791_c0_g1	264	67.2	6	7.2	DN25791_c0_g1_i1	G116634	G1166341		264	67.15	6	7.15	100	CDS	261	47.13	-1	dihydroorotate dehydrogenase (fumarate)	KO:K00226	Bacteria	Bacteroidetes	Bacteroidia	Marinilabiliales	Prolixibacteraceae	Draconibacterium
DN27085_c0_g1	529	330	12	2.9	DN27085_c0_g1_i1	G140882	G1408821		529	330	12	2.91	100	CDS	525	65.71	-1	signal transduction histidine kinase	COG0642	Bacteria	Bacteroidetes	Bacteroidia	Marinilabiliales	Prolixibacteraceae	Draconibacterium
DN28211_c0_g1	406	207	5	1.9	DN28211_c0_g1_i1	G134645	G1346451	1	406	207	5	1.93	100	CDS	105	#N/A	1	HP	HPrule	Bacteria	Bacteroidetes	Bacteroidia	Marinilabiliales	Prolixibacteraceae	Draconibacterium
DN28211_c0_g1	406	207	5	1.9	DN28211_c0_g1_i1	G134645	G1346452	2	406	207	5	1.93	100	CDS	279	60.22	1	HP	HPrule	Bacteria	Bacteroidetes	Bacteroidia	Marinilabiliales	Prolixibacteraceae	Draconibacterium
DN28893_c0_g1	439	240	8	2.7	DN28893_c0_g1_i1	G136843	G1368431		439	240	8	2.67	100	CDS	387	66.67	1	CheY-like chemotaxis protein	COG0784	Bacteria	Bacteroidetes	Bacteroidia	Marinilabiliales	Prolixibacteraceae	Draconibacterium
DN29566_c0_g1	273	75.2	3	3.2	DN29566_c0_g1_i1	G118502	G1185021		273	75.15	3	3.2	100	CDS	270	92.22	-1	methylmalonyl-CoA mutase	KO:K01847	Bacteria	Bacteroidetes	Bacteroidia	Marinilabiliales	Prolixibacteraceae	Draconibacterium
DN30025_c0_g1	203	24.1	6	20	DN30025_c0_g1_i1	G100688	G1006881		203	24.07	6	19.96	100	CDS	201	49.23	1	PA domain-containing protein	pfam02225	Bacteria	Bacteroidetes	Bacteroidia	Marinilabiliales	Prolixibacteraceae	Draconibacterium
DN32602_c0_g1	512	313	8	2.1	DN32602_c0_g1_i1	G140276	G1402761		512	313	8	2.05	100	CDS	510	53.49	-1	CheY-like chemotaxis protein	COG0784	Bacteria	Bacteroidetes	Bacteroidia	Marinilabiliales	Prolixibacteraceae	Draconibacterium
DN35430_c0_g1	254	58.7	3	4.1	DN35430_c0_g1_i1	G114461	G1144611		254	58.7	3	4.09	100	CDS	156	72	-1	KilA domain-containing protein	pfam04383	Bacteria	Bacteroidetes	Bacteroidia	Marinilabiliales	Prolixibacteraceae	Draconibacterium
DN35959_c0_g1	308	109	4	2.9	DN35959_c0_g1_i1	G124609	G1246091		308	109	4	2.94	100	CDS	306	34.74	-1	HP	HPrule	Bacteria	Bacteroidetes	Bacteroidia	Marinilabiliales	Prolixibacteraceae	Draconibacterium
DN37099_c0_g1	352	153	6	3.1	DN37099_c0_g1_i1	G130039	G1300391		352	153	6	3.14	100	CDS	348	45.69	1	S1-C subfamily serine protease	COG0265	Bacteria	Bacteroidetes	Bacteroidia	Marinilabiliales	Prolixibacteraceae	Draconibacterium
DN38237_c0_g1	452	253	9	2.9	DN38237_c0_g1_i1	G137543	G1375431		452	253	9	2.85	100	CDS	450	83.89	-1	pyruvate-ferredoxin/flavodoxin oxidoreductase	KO:K03737	Bacteria	Bacteroidetes	Bacteroidia	Marinilabiliales	Prolixibacteraceae	Draconibacterium
DN39053_c0_g1	254	58.7	5	6.8	DN39053_c0_g1_i1	G114476	G1144761		254	58.7	5	6.82	100	CDS	252	56.25	-1	putative ABC transport system permease protein	KO:K02004	Bacteria	Bacteroidetes	Bacteroidia	Marinilabiliales	Prolixibacteraceae	Draconibacterium
DN40547_c0_g1	526	327	16	3.9	DN40547_c0_g1_i1	G140772	G1407721		526	327	16	3.92	100	CDS	525	40.7	1	HP	HPrule	Bacteria	Bacteroidetes	Bacteroidia	Marinilabiliales	Prolixibacteraceae	Draconibacterium
DN41191_c0_g1	666	467	19	3.3	DN41191_c0_g1_i1	G144286	G1442861		666	467	19	3.26	100	CDS	663	78.73	-1	propionyl-CoA carboxylase beta chain	KO:K01966	Bacteria	Bacteroidetes	Bacteroidia	Marinilabiliales	Prolixibacteraceae	Draconibacterium
DN41322_c0_g1	265	68	5	5.9	DN41322_c0_g1_i1	G116933	G1169331		265	68.02	5	5.89	100	CDS	207	89.71	1	HP	HPrule	Bacteria	Bacteroidetes	Bacteroidia	Marinilabiliales	Prolixibacteraceae	Draconibacterium
DN41471_c0_g1	302	103	6	4.7	DN41471_c0_g1_i1	G123764	G1237641		302	103	6	4.66	100	CDS	300	81.63	1	two-component system response regulator HydG	KO:K07713	Bacteria	Bacteroidetes	Bacteroidia	Marinilabiliales	Prolixibacteraceae	Draconibacterium
DN41729_c0_g1	272	74.2	5	5.4	DN41729_c0_g1_i1	G118346	G1183461		272	74.24	5	5.39	100	CDS	270	35.56	1	signal transduction histidine kinase	COG0642	Bacteria	Bacteroidetes	Bacteroidia	Marinilabiliales	Prolixibacteraceae	Draconibacterium
DN42365_c0_g1	327	128	7	4.4	DN42365_c0_g1_i1	G127195	G1271951		327	128	7	4.38	100	CDS	327	58.72	1	HP	HPrule	Bacteria	Bacteroidetes	Bacteroidia	Marinilabiliales	Prolixibacteraceae	Draconibacterium
DN4239_c0_g1	485	286	24	6.7	DN4239_c0_g1_i1	G139186	G1391861		485	286	24	6.72	100	CDS	285	43.68	1	HP	HPrule	Bacteria	Bacteroidetes	Bacteroidia	Marinilabiliales	Prolixibacteraceae	Draconibacterium
DN44259_c0_g1	391	192	5	2.1	DN44259_c0_g1_i1	G133564	G1335641		391	192	5	2.09	100	CDS	390	57.14	-1	uridine phosphorylase	KO:K00757	Bacteria	Bacteroidetes	Bacteroidia	Marinilabiliales	Prolixibacteraceae	Draconibacterium
DN45272_c0_g1	535	336	12	2.9	DN45272_c0_g1_i1	G141049	G1410491		535	336	12	2.86	100	CDS	531	53.53	-1	outer membrane receptor protein involved in Fe transport	COG1629	Bacteria	Bacteroidetes	Bacteroidia	Marinilabiliales	Prolixibacteraceae	Draconibacterium
DN46951_c0_g1	642	443	34	6.2	DN46951_c0_g1_i1	G143848	G1438481	1	642	443	34	6.15	100	CDS	372	61.67	1	DNA-binding response OmpR family regulator	COG0745	Bacteria	Bacteroidetes	Bacteroidia	Marinilabiliales	Prolixibacteraceae	Draconibacterium
DN46951_c0_g1	642	443	34	6.2	DN46951_c0_g1_i1	G143848	G1438482	2	642	443	34	6.15	100	CDS	171	#N/A	1	HP	HPrule	Bacteria	Bacteroidetes	Bacteroidia	Marinilabiliales	Prolixibacteraceae	Draconibacterium
DN50160_c0_g1	236	44.8	4	7.2	DN50160_c0_g1_i1	G109912	G1099121		236	44.76	4	7.16	100	CDS	234	88.46	1	aldehyde dehydrogenase (NAD+)	KO:K00128	Bacteria	Bacteroidetes	Bacteroidia	Marinilabiliales	Prolixibacteraceae	Draconibacterium
DN11770_c0_g1	417	218	6	2.2	DN11770_c0_g1_i1	G135381	G1353811		417	218	6	2.2	100	CDS	414	55.47	-1	aminoglycoside/choline kinase family phosphotransferase	COG3178	Bacteria	Bacteroidetes	Bacteroidia	Marinilabiliales	Prolixibacteraceae	Mangrovibacterium
DN12887_c0_g1	303	104	4	3.1	DN12887_c0_g1_i1	G123827	G1238271		303	104	4	3.08	100	CDS	300	44.44	1	multidrug efflux system outer membrane protein	KO:K18139	Bacteria	Bacteroidetes	Bacteroidia	Marinilabiliales	Prolixibacteraceae	Mangrovibacterium
DN13057_c0_g1	608	409	30	5.9	DN13057_c0_g1_i1	G143073	G1430731		608	409	30	5.87	100	CDS	606	80.2	-1	dihydrolipoamide dehydrogenase	KO:K00382	Bacteria	Bacteroidetes	Bacteroidia	Marinilabiliales	Prolixibacteraceae	Mangrovibacterium
DN17192_c0_g1	494	295	10	2.7	DN17192_c0_g1_i1	G139527	G1395271		494	295	10	2.71	100	CDS	492	43.29	1	tetratricopeptide (TPR) repeat protein	COG0457	Bacteria	Bacteroidetes	Bacteroidia	Marinilabiliales	Prolixibacteraceae	Mangrovibacterium
DN17907_c0_g1	232	41.9	3	5.7	DN17907_c0_g1_i1	G108684	G1086841		232	41.9	3	5.73	100	CDS	201	67.69	-1	HP	HPrule	Bacteria	Bacteroidetes	Bacteroidia	Marinilabiliales	Prolixibacteraceae	Mangrovibacterium
DN20036_c0_g1	348	149	5	2.7	DN20036_c0_g1_i1	G129594	G1295941		348	149	5	2.69	100	CDS	345	49.56	1	putative ABC transport system permease protein	KO:K02004	Bacteria	Bacteroidetes	Bacteroidia	Marinilabiliales	Prolixibacteraceae	Mangrovibacterium
DN21954_c0_g1	239	47	5	8.5	DN21954_c0_g1_i1	G110534	G1105341		239	46.96	5	8.53	100	CDS	237	75.32	1	GH3 auxin-responsive promoter	pfam03321	Bacteria	Bacteroidetes	Bacteroidia	Marinilabiliales	Prolixibacteraceae	Mangrovibacterium
DN22201_c0_g1	346	147	5	2.7	DN22201_c0_g1_i1	G129415	G1294151		346	147	5	2.72	100	CDS	345	52.17	1	cobalt-zinc-cadmium efflux system protein	KO:K16264	Bacteria	Bacteroidetes	Bacteroidia	Marinilabiliales	Prolixibacteraceae	Mangrovibacterium
DN26054_c0_g1	398	199	14	5.6	DN26054_c0_g1_i1	G134067	G1340671		398	199	14	5.63	100	CDS	396	42.19	-1	HP	HPrule	Bacteria	Bacteroidetes	Bacteroidia	Marinilabiliales	Prolixibacteraceae	Mangrovibacterium
DN27075_c0_g1	518	319	7	1.8	DN27075_c0_g1_i1	G140506	G1405061		518	319	7	1.76	100	CDS	516	33.06	1	HP	HPrule	Bacteria	Bacteroidetes	Bacteroidia	Marinilabiliales	Prolixibacteraceae	Mangrovibacterium
DN2823_c0_g1	261	64.6	20	24.8	DN2823_c0_g1_i1	G116009	G1160091		261	64.57	20	24.8	100	CDS	102	72.73	1	HP	HPrule	Bacteria	Bacteroidetes	Bacteroidia	Marinilabiliales	Prolixibacteraceae	Mangrovibacterium
DN30849_c0_g1	226	37.8	4	8.5	DN30849_c0_g1_i1	G107127	G1071271		226	37.8	4	8.47	100	CDS	225	57.75	1	short-subunit dehydrogenase	COG0300	Bacteria	Bacteroidetes	Bacteroidia	Marinilabiliales	Prolixibacteraceae	Mangrovibacterium
DN32262_c0_g1	277	78.8	5	5.1	DN32262_c0_g1_i1	G119280	G1192801		277	78.81	5	5.08	100	CDS	210	69.57	1	HP	HPrule	Bacteria	Bacteroidetes	Bacteroidia	Marinilabiliales	Prolixibacteraceae	Mangrovibacterium
DN3238_c0_g1	265	68	6	7.1	DN3238_c0_g1_i1	G116893	G1168931		265	68.02	6	7.06	100	CDS	261	62.79	1	two-component system response regulator HydG	KO:K07713	Bacteria	Bacteroidetes	Bacteroidia	Marinilabiliales	Prolixibacteraceae	Mangrovibacterium
DN32483_c0_g1	366	167	5	2.4	DN32483_c0_g1_i1	G131396	G1313961		366	167	5	2.4	100	CDS	363	61.98	1	DnaJ like chaperone protein	KO:K05801	Bacteria	Bacteroidetes	Bacteroidia	Marinilabiliales	Prolixibacteraceae	Mangrovibacterium
DN33371_c0_g1	398	199	6	2.4	DN33371_c0_g1_i1	G134087	G1340871		398	199	6	2.41	100	CDS	396	58.33	1	alkaline phosphatase D	KO:K01113	Bacteria	Bacteroidetes	Bacteroidia	Marinilabiliales	Prolixibacteraceae	Mangrovibacterium
DN34239_c0_g1	288	89.2	3	2.7	DN34239_c0_g1_i1	G121346	G1213461		288	89.2	3	2.69	100	CDS	288	64.04	1	HAE1 family hydrophobic/amphiphilic exporter-1	KO:K03296	Bacteria	Bacteroidetes	Bacteroidia	Marinilabiliales	Prolixibacteraceae	Mangrovibacterium
DN34626_c0_g1	263	66.3	3	3.6	DN34626_c0_g1_i1	G116463	G1164631		263	66.28	3	3.62	100	CDS	261	67.44	1	Na+/H+-dicarboxylate symporter	COG1301	Bacteria	Bacteroidetes	Bacteroidia	Marinilabiliales	Prolixibacteraceae	Mangrovibacterium
DN35864_c0_g1	510	311	10	2.6	DN35864_c0_g1_i1	G140199	G1401991		510	311	10	2.57	100	CDS	510	62.35	1	threonine aldolase	KO:K01620	Bacteria	Bacteroidetes	Bacteroidia	Marinilabiliales	Prolixibacteraceae	Mangrovibacterium
DN37162_c0_g1	347	148	9	4.9	DN37162_c0_g1_i1	G129537	G1295371		347	148	9	4.87	100	CDS	345	75.7	1	phenylalanyl-tRNA synthetase beta chain	KO:K01890	Bacteria	Bacteroidetes	Bacteroidia	Marinilabiliales	Prolixibacteraceae	Mangrovibacterium
DN38686_c0_g1	322	123	4	2.6	DN38686_c0_g1_i1	G126504	G1265041		322	123	4	2.6	100	CDS	321	55.14	1	penicillin-binding protein 2	KO:K05515	Bacteria	Bacteroidetes	Bacteroidia	Marinilabiliales	Prolixibacteraceae	Mangrovibacterium
DN40558_c0_g1	288	89.2	4	3.6	DN40558_c0_g1_i1	G121373	G1213731		288	89.2	4	3.59	100	CDS	213	91.18	1	transcriptional regulator with XRE-family HTH domain	COG1396	Bacteria	Bacteroidetes	Bacteroidia	Marinilabiliales	Prolixibacteraceae	Mangrovibacterium
DN41426_c0_g1	366	167	5	2.4	DN41426_c0_g1_i1	G131408	G1314081		366	167	5	2.4	100	CDS	366	57.38	1	HP	HPrule	Bacteria	Bacteroidetes	Bacteroidia	Marinilabiliales	Prolixibacteraceae	Mangrovibacterium
DN41498_c0_g1	213	29.6	4	10.8	DN41498_c0_g1_i1	G103551	G1035511		213	29.64	4	10.81	100	CDS	210	40.58	1	uncharacterized lipoprotein YddW (UPF0748 family)	COG1649	Bacteria	Bacteroidetes	Bacteroidia	Marinilabiliales	Prolixibacteraceae	Mangrovibacterium
DN42851_c0_g1	217	32	4	10	DN42851_c0_g1_i1	G104687	G1046871		217	32.04	4	10	100	CDS	216	64.79	-1	proline dehydrogenase	KO:K00318	Bacteria	Bacteroidetes	Bacteroidia	Marinilabiliales	Prolixibacteraceae	Mangrovibacterium
DN4293_c0_g1	1267	1068	44	3.3	DN4293_c0_g1_i1	G149063	G1490631	1	1267	1068	44	3.3	100	CDS	228	#N/A	-1	HP	HPrule	Bacteria	Bacteroidetes	Bacteroidia	Marinilabiliales	Prolixibacteraceae	Mangrovibacterium
DN4293_c0_g1	1267	1068	44	3.3	DN4293_c0_g1_i1	G149063	G1490632	2	1267	1068	44	3.3	100	CDS	984	64.04	-1	cytochrome c oxidase cbb3-type subunit I/II	KO:K15862	Bacteria	Bacteroidetes	Bacteroidia	Marinilabiliales	Prolixibacteraceae	Mangrovibacterium
DN43851_c0_g1	1295	1096	67	4.9	DN43851_c0_g1_i1	G149149	G1491491		1295	1096	67	4.9	100	CDS	1293	57.54	-1	ferrous iron transport protein B	KO:K04759	Bacteria	Bacteroidetes	Bacteroidia	Marinilabiliales	Prolixibacteraceae	Mangrovibacterium
DN44623_c0_g1	970	771	24	2.5	DN44623_c0_g1_i1	G147636	G1476361		970	771	24	2.49	100	CDS	969	48.9	-1	iron complex outermembrane receptor protein	KO:K02014	Bacteria	Bacteroidetes	Bacteroidia	Marinilabiliales	Prolixibacteraceae	Mangrovibacterium
DN45511_c0_g1	266	68.9	3	3.5	DN45511_c0_g1_i1	G117155	G1171551		266	68.9	3	3.49	100	CDS	264	75.28	-1	histidyl-tRNA synthetase	KO:K01892	Bacteria	Bacteroidetes	Bacteroidia	Marinilabiliales	Prolixibacteraceae	Mangrovibacterium
DN45959_c0_g1	263	66.3	4	4.8	DN45959_c0_g1_i1	G116515	G1165151		263	66.28	4	4.83	100	CDS	246	58.75	1	cystathionine beta-lyase	KO:K14155	Bacteria	Bacteroidetes	Bacteroidia	Marinilabiliales	Prolixibacteraceae	Mangrovibacterium
DN46081_c0_g1	554	355	27	6.1	DN46081_c0_g1_i1	G141636	G1416361		554	355	27	6.09	100	CDS	342	45.79	1	HP	HPrule	Bacteria	Bacteroidetes	Bacteroidia	Marinilabiliales	Prolixibacteraceae	Mangrovibacterium
DN9236_c0_g1	804	605	1084	143.5	DN9236_c0_g1_i1	G146229	G1462291	1	804	605	1084	143.48	100	CDS	318	53.85	1	4-alpha-glucanotransferase	KO:K00705	Bacteria	Bacteroidetes	Bacteroidia	Marinilabiliales	Prolixibacteraceae	Mangrovibacterium
DN9236_c0_g1	804	605	1084	143.5	DN9236_c0_g1_i1	G146229	G1462292	2	804	605	1084	143.48	100	CDS	186	#N/A	-1	HP	HPrule	Bacteria	Bacteroidetes	Bacteroidia	Marinilabiliales	Prolixibacteraceae	Mangrovibacterium
DN12710_c0_g1	298	99	6	4.9	DN12710_c0_g1_i1	G123007	G1230071		298	99	6	4.85	100	CDS	297	60.64	-1	cytidine deaminase	KO:K01489	Bacteria	Bacteroidetes	Bacteroidia	Marinilabiliales	Prolixibacteraceae	Mariniphaga
DN13539_c0_g1	238	46.2	40	69.3	DN13539_c0_g1_i1	G110242	G1102421		238	46.22	40	69.3	100	CDS	147	95.74	1	large subunit ribosomal protein L34	KO:K02914	Bacteria	Bacteroidetes	Bacteroidia	Marinilabiliales	Prolixibacteraceae	Mariniphaga
DN13672_c0_g1	431	232	10	3.5	DN13672_c0_g1_i1	G136315	G1363151		431	232	10	3.45	100	CDS	429	61.54	-1	ATP-dependent Lon protease	KO:K01338	Bacteria	Bacteroidetes	Bacteroidia	Marinilabiliales	Prolixibacteraceae	Mariniphaga
DN13845_c0_g1	489	290	10	2.8	DN13845_c0_g1_i1	G139329	G1393291		489	290	10	2.76	100	CDS	489	27.78	-1	tetratricopeptide (TPR) repeat protein	COG0457	Bacteria	Bacteroidetes	Bacteroidia	Marinilabiliales	Prolixibacteraceae	Mariniphaga
DN15343_c0_g1	276	77.9	5	5.1	DN15343_c0_g1_i1	G119028	G1190281		276	77.89	5	5.14	100	CDS	252	71.08	1	peptidase C69-like protein	pfam03577	Bacteria	Bacteroidetes	Bacteroidia	Marinilabiliales	Prolixibacteraceae	Mariniphaga
DN15598_c0_g1	452	253	6	1.9	DN15598_c0_g1_i1	G137519	G1375191	1	452	253	6	1.9	100	CDS	153	#N/A	-1	HP	HPrule	Bacteria	Bacteroidetes	Bacteroidia	Marinilabiliales	Prolixibacteraceae	Mariniphaga
DN15598_c0_g1	452	253	6	1.9	DN15598_c0_g1_i1	G137519	G1375192	2	452	253	6	1.9	100	CDS	240	48.61	-1	outer membrane receptor for ferrienterochelin and colicins	KO:K16089	Bacteria	Bacteroidetes	Bacteroidia	Marinilabiliales	Prolixibacteraceae	Mariniphaga
DN17118_c0_g1	430	231	7	2.4	DN17118_c0_g1_i1	G136252	G1362521		430	231	7	2.43	100	CDS	429	39.86	1	zinc protease	KO:K07263	Bacteria	Bacteroidetes	Bacteroidia	Marinilabiliales	Prolixibacteraceae	Mariniphaga
DN17971_c0_g1	919	720	29	3.2	DN17971_c0_g1_i1	G147277	G1472771		919	720	29	3.23	100	CDS	756	71.97	1	GTP cyclohydrolase I	KO:K01495	Bacteria	Bacteroidetes	Bacteroidia	Marinilabiliales	Prolixibacteraceae	Mariniphaga
DN20010_c0_g1	944	745	38	4.1	DN20010_c0_g1_i1	G147462	G1474621		944	745	38	4.08	100	CDS	942	54.78	1	dihydroorotate dehydrogenase (fumarate)	KO:K00226	Bacteria	Bacteroidetes	Bacteroidia	Marinilabiliales	Prolixibacteraceae	Mariniphaga
DN21400_c0_g1	220	33.9	4	9.5	DN21400_c0_g1_i1	G105434	G1054341		220	33.9	4	9.45	100	CDS	219	68.49	1	selenocysteine lyase/cysteine desulfurase	COG0520	Bacteria	Bacteroidetes	Bacteroidia	Marinilabiliales	Prolixibacteraceae	Mariniphaga
DN26555_c0_g1	209	27.3	4	11.7	DN26555_c0_g1_i1	G102356	G1023561		209	27.33	4	11.72	100	CDS	207	56.52	-1	HP	HPrule	Bacteria	Bacteroidetes	Bacteroidia	Marinilabiliales	Prolixibacteraceae	Mariniphaga
DN27192_c0_g1	279	80.7	5	5	DN27192_c0_g1_i1	G119645	G1196451		279	80.67	5	4.96	100	CDS	276	80.43	-1	dipeptidase	COG4690	Bacteria	Bacteroidetes	Bacteroidia	Marinilabiliales	Prolixibacteraceae	Mariniphaga
DN27771_c0_g1	470	271	12	3.6	DN27771_c0_g1_i1	G138487	G1384871		470	271	12	3.55	100	CDS	468	39.74	1	HP	KO:K07052	Bacteria	Bacteroidetes	Bacteroidia	Marinilabiliales	Prolixibacteraceae	Mariniphaga
DN28049_c0_g1	277	78.8	4	4.1	DN28049_c0_g1_i1	G119262	G1192621		277	78.81	4	4.06	100	CDS	276	71.74	-1	HP	HPrule	Bacteria	Bacteroidetes	Bacteroidia	Marinilabiliales	Prolixibacteraceae	Mariniphaga
DN28559_c0_g1	562	363	9	2	DN28559_c0_g1_i1	G141861	G1418611		562	363	9	1.99	100	CDS	561	58.82	1	Tol biopolymer transport system component	COG0823	Bacteria	Bacteroidetes	Bacteroidia	Marinilabiliales	Prolixibacteraceae	Mariniphaga
DN30448_c0_g1	267	69.8	4	4.6	DN30448_c0_g1_i1	G117306	G1173061		267	69.78	4	4.59	100	CDS	267	60	-1	HP	KO:K00936	Bacteria	Bacteroidetes	Bacteroidia	Marinilabiliales	Prolixibacteraceae	Mariniphaga
DN31849_c0_g1	392	193	9	3.7	DN31849_c0_g1_i1	G133622	G1336221		392	193	9	3.73	100	CDS	390	42.75	-1	uncharacterized protein involved in exopolysaccharide biosynthesis	COG3206	Bacteria	Bacteroidetes	Bacteroidia	Marinilabiliales	Prolixibacteraceae	Mariniphaga
DN33071_c0_g1	311	112	6	4.3	DN33071_c0_g1_i1	G125050	G1250501		311	112	6	4.29	100	CDS	309	79.21	1	dipeptidase	COG4690	Bacteria	Bacteroidetes	Bacteroidia	Marinilabiliales	Prolixibacteraceae	Mariniphaga
DN33778_c0_g1	423	224	7	2.5	DN33778_c0_g1_i1	G135826	G1358261		423	224	7	2.5	100	CDS	417	64.29	-1	HP	HPrule	Bacteria	Bacteroidetes	Bacteroidia	Marinilabiliales	Prolixibacteraceae	Mariniphaga
DN35602_c0_g1	386	187	6	2.6	DN35602_c0_g1_i1	G133165	G1331651		386	187	6	2.57	100	CDS	384	66.41	-1	putative protease	KO:K08303	Bacteria	Bacteroidetes	Bacteroidia	Marinilabiliales	Prolixibacteraceae	Mariniphaga
DN40242_c0_g1	366	167	5	2.4	DN40242_c0_g1_i1	G131406	G1314061		366	167	5	2.4	100	CDS	366	63.96	-1	PIF1-like helicase	pfam05970	Bacteria	Bacteroidetes	Bacteroidia	Marinilabiliales	Prolixibacteraceae	Mariniphaga
DN41169_c0_g1	411	212	10	3.8	DN41169_c0_g1_i1	G135011	G1350111		411	212	10	3.78	100	CDS	411	79.56	-1	cytochrome c	pfam11783	Bacteria	Bacteroidetes	Bacteroidia	Marinilabiliales	Prolixibacteraceae	Mariniphaga
DN42169_c0_g1	245	51.5	3	4.7	DN42169_c0_g1_i1	G112332	G1123321		245	51.51	3	4.66	100	CDS	243	57.69	1	HP	HPrule	Bacteria	Bacteroidetes	Bacteroidia	Marinilabiliales	Prolixibacteraceae	Mariniphaga
DN43448_c0_g1	268	70.7	3	3.4	DN43448_c0_g1_i1	G117562	G1175621		268	70.66	3	3.4	100	CDS	243	69.62	1	HP	HPrule	Bacteria	Bacteroidetes	Bacteroidia	Marinilabiliales	Prolixibacteraceae	Mariniphaga
DN11951_c0_g1	531	332	10	2.4	DN11951_c0_g1_i1	G140927	G1409271		531	332	10	2.41	100	CDS	504	57.14	1	peptidase S46-like protein	pfam10459	Bacteria	Bacteroidetes	Bacteroidia	Marinilabiliales	Prolixibacteraceae	Prolixibacter
DN12184_c0_g1	491	292	10	2.7	DN12184_c0_g1_i1	G139400	G1394001		491	292	10	2.74	100	CDS	489	36.52	-1	LysM repeat protein/LysM repeat protein	COG1388,COG1388	Bacteria	Bacteroidetes	Bacteroidia	Marinilabiliales	Prolixibacteraceae	Prolixibacter
DN13257_c0_g1	547	348	14	3.2	DN13257_c0_g1_i1	G141409	G1414091		547	348	14	3.22	100	CDS	546	75.96	-1	pyruvate-ferredoxin/flavodoxin oxidoreductase	KO:K03737	Bacteria	Bacteroidetes	Bacteroidia	Marinilabiliales	Prolixibacteraceae	Prolixibacter
DN14637_c0_g1	515	316	12	3	DN14637_c0_g1_i1	G140375	G1403751		515	316	12	3.04	100	CDS	513	46.38	-1	POT family proton-dependent oligopeptide transporter	KO:K03305	Bacteria	Bacteroidetes	Bacteroidia	Marinilabiliales	Prolixibacteraceae	Prolixibacter
DN14670_c0_g1	340	141	4	2.3	DN14670_c0_g1_i1	G128738	G1287381		340	141	4	2.27	100	CDS	339	57.14	1	HP	KO:K07098	Bacteria	Bacteroidetes	Bacteroidia	Marinilabiliales	Prolixibacteraceae	Prolixibacter
DN16075_c0_g1	233	42.6	4	7.5	DN16075_c0_g1_i1	G108920	G1089201		233	42.61	4	7.52	100	CDS	231	74.03	1	aconitate hydratase	KO:K01681	Bacteria	Bacteroidetes	Bacteroidia	Marinilabiliales	Prolixibacteraceae	Prolixibacter
DN18792_c0_g1	324	125	5	3.2	DN18792_c0_g1_i1	G126734	G1267341		324	125	5	3.2	100	CDS	324	93.52	-1	HP	HPrule	Bacteria	Bacteroidetes	Bacteroidia	Marinilabiliales	Prolixibacteraceae	Prolixibacter
DN21748_c0_g1	219	33.3	3	7.2	DN21748_c0_g1_i1	G105149	G1051491		219	33.27	3	7.22	100	CDS	219	49.23	-1	phospholipid/cholesterol/gamma-HCH transport system permease protein	KO:K02066	Bacteria	Bacteroidetes	Bacteroidia	Marinilabiliales	Prolixibacteraceae	Prolixibacter
DN22624_c0_g1	202	23.6	3	10.2	DN22624_c0_g1_i1	G100386	G1003861		202	23.55	3	10.2	100	CDS	201	62.69	1	signal transduction histidine kinase	COG0642	Bacteria	Bacteroidetes	Bacteroidia	Marinilabiliales	Prolixibacteraceae	Prolixibacter
DN23892_c0_g1	1580	1381	53	3.1	DN23892_c0_g1_i1	G149874	G1498741		1580	1381	53	3.07	100	CDS	1449	49.48	-1	iron complex outermembrane receptor protein	KO:K02014	Bacteria	Bacteroidetes	Bacteroidia	Marinilabiliales	Prolixibacteraceae	Prolixibacter
DN26278_c0_g1	753	554	50	7.2	DN26278_c0_g1_i1	G145638	G1456381		753	554	50	7.23	100	CDS	666	45.54	-1	FKBP-type peptidyl-prolyl cis-trans isomerase SlyD	KO:K03775	Bacteria	Bacteroidetes	Bacteroidia	Marinilabiliales	Prolixibacteraceae	Prolixibacter
DN26998_c0_g1	374	175	7	3.2	DN26998_c0_g1_i1	G132103	G1321031		374	175	7	3.2	100	CDS	372	73.98	1	transposase	COG3547	Bacteria	Bacteroidetes	Bacteroidia	Marinilabiliales	Prolixibacteraceae	Prolixibacter
DN32732_c0_g1	266	68.9	4	4.7	DN32732_c0_g1_i1	G117108	G1171081		266	68.9	4	4.65	100	CDS	264	54.55	-1	4-hydroxythreonine-4-phosphate dehydrogenase	KO:K00097	Bacteria	Bacteroidetes	Bacteroidia	Marinilabiliales	Prolixibacteraceae	Prolixibacter
DN32883_c0_g1	304	105	5	3.8	DN32883_c0_g1_i1	G124052	G1240521		304	105	5	3.81	100	CDS	303	60.61	-1	HP	HPrule	Bacteria	Bacteroidetes	Bacteroidia	Marinilabiliales	Prolixibacteraceae	Prolixibacter
DN33160_c0_g1	553	354	11	2.5	DN33160_c0_g1_i1	G141605	G1416051		553	354	11	2.49	100	CDS	549	71.27	1	aldehyde dehydrogenase (NAD+)	KO:K00128	Bacteria	Bacteroidetes	Bacteroidia	Marinilabiliales	Prolixibacteraceae	Prolixibacter
DN34063_c0_g1	228	39.1	3	6.1	DN34063_c0_g1_i1	G107707	G1077071		228	39.14	3	6.14	100	CDS	225	69.33	1	HP	HPrule	Bacteria	Bacteroidetes	Bacteroidia	Marinilabiliales	Prolixibacteraceae	Prolixibacter
DN34742_c0_g1	261	64.6	5	6.2	DN34742_c0_g1_i1	G116031	G1160311		261	64.57	5	6.2	100	CDS	258	58.82	-1	undecaprenyl-diphosphatase	KO:K19302	Bacteria	Bacteroidetes	Bacteroidia	Marinilabiliales	Prolixibacteraceae	Prolixibacter
DN35414_c0_g1	363	164	4	2	DN35414_c0_g1_i1	G131114	G1311141		363	164	4	1.95	100	CDS	360	65.83	1	acetolactate synthase-1/2/3 large subunit	KO:K01652	Bacteria	Bacteroidetes	Bacteroidia	Marinilabiliales	Prolixibacteraceae	Prolixibacter
DN38486_c0_g1	645	446	22	4	DN38486_c0_g1_i1	G143894	G1438941		645	446	22	3.95	100	CDS	642	52.34	-1	ATP-binding protein involved in chromosome partitioning	KO:K03593	Bacteria	Bacteroidetes	Bacteroidia	Marinilabiliales	Prolixibacteraceae	Prolixibacter
DN43972_c0_g1	229	39.8	5	10.1	DN43972_c0_g1_i1	G108014	G1080141		229	39.82	5	10.05	100	CDS	228	78.95	-1	aldehyde dehydrogenase (NAD+)	KO:K00128	Bacteria	Bacteroidetes	Bacteroidia	Marinilabiliales	Prolixibacteraceae	Prolixibacter
DN47466_c0_g1	529	330	9	2.2	DN47466_c0_g1_i1	G140895	G1408951		529	330	9	2.18	100	CDS	528	31.78	-1	HP	HPrule	Bacteria	Bacteroidetes	Bacteroidia	Marinilabiliales	Prolixibacteraceae	Prolixibacter
DN49392_c0_g1	318	119	5	3.4	DN49392_c0_g1_i1	G126040	G1260401		318	119	5	3.36	100	CDS	285	53.09	-1	murein DD-endopeptidase MepM/ murein hydrolase activator NlpD	COG0739	Bacteria	Bacteroidetes	Bacteroidia	Marinilabiliales	Prolixibacteraceae	Prolixibacter
DN9249_c0_g1	1495	1296	108	6.7	DN9249_c0_g1_i1	G149711	G1497111	1	1495	1296	108	6.67	100	CDS	732	27.09	-1	tetratricopeptide (TPR) repeat protein	COG0457	Bacteria	Bacteroidetes	Bacteroidia	Marinilabiliales	Prolixibacteraceae	Prolixibacter
DN9249_c0_g1	1495	1296	108	6.7	DN9249_c0_g1_i1	G149711	G1497112	2	1495	1296	108	6.67	100	CDS	600	#N/A	-1	DNA-directed RNA polymerase specialized sigma24 family protein	COG1595	Bacteria	Bacteroidetes	Bacteroidia	Marinilabiliales	Prolixibacteraceae	Prolixibacter
DN15848_c0_g1	227	38.5	4	8.3	DN15848_c0_g1_i1	G107315	G1073151		227	38.47	4	8.33	100	CDS	225	69.01	1	nitrite reductase (cytochrome c-552)	KO:K03385	Bacteria	Bacteroidetes	Bacteroidia	Marinilabiliales	Prolixibacteraceae	Sunxiuqinia
DN13918_c0_g1	524	325	40	9.9	DN13918_c0_g1_i1	G140693	G1406931		524	325	40	9.86	100	CDS	486	77.5	-1	bacterioferritin	KO:K03594	Bacteria	Bacteroidetes	Bacteroidia	Marinilabiliales	Prolixibacteraceae	Tangfeifania
DN14256_c0_g1	298	99	10	8.1	DN14256_c0_g1_i1	G123013	G1230131		298	99	10	8.09	100	CDS	297	53.16	-1	RNA polymerase sigma-70 factor (ECF subfamily)	KO:K03088	Bacteria	Bacteroidetes	Bacteroidia	Marinilabiliales	Prolixibacteraceae	Tangfeifania
DN17270_c0_g1	498	299	16	4.3	DN17270_c0_g1_i1	G139697	G1396971		498	299	16	4.29	100	CDS	498	37.41	1	uncharacterized protein DUF11	pfam01345	Bacteria	Bacteroidetes	Bacteroidia	Marinilabiliales	Prolixibacteraceae	Tangfeifania
DN18557_c0_g1	614	415	25	4.8	DN18557_c0_g1_i1	G143224	G1432241		614	415	25	4.82	100	CDS	531	35.98	1	uncharacterized protein DUF4252	pfam14060	Bacteria	Bacteroidetes	Bacteroidia	Marinilabiliales	Prolixibacteraceae	Tangfeifania
DN22898_c0_g1	201	23	3	10.4	DN22898_c0_g1_i1	G100100	G1001001		201	23.03	3	10.43	100	CDS	198	44.44	1	subfamily B ATP-binding cassette protein MsbA	KO:K11085	Bacteria	Bacteroidetes	Bacteroidia	Marinilabiliales	Prolixibacteraceae	Tangfeifania
DN22921_c0_g1	244	50.7	6	9.5	DN22921_c0_g1_i1	G111913	G1119131		244	50.74	6	9.47	100	CDS	222	89.19	-1	GTP-binding protein	KO:K06207	Bacteria	Bacteroidetes	Bacteroidia	Marinilabiliales	Prolixibacteraceae	Tangfeifania
DN25324_c0_g1	416	217	11	4.1	DN25324_c0_g1_i1	G135338	G1353381		416	217	11	4.06	100	CDS	414	43.7	-1	HP	HPrule	Bacteria	Bacteroidetes	Bacteroidia	Marinilabiliales	Prolixibacteraceae	Tangfeifania
DN25531_c0_g1	217	32	4	10	DN25531_c0_g1_i1	G104590	G1045901		217	32.04	4	10	100	CDS	216	71.43	1	UDP-glucose 4-epimerase	KO:K01784	Bacteria	Bacteroidetes	Bacteroidia	Marinilabiliales	Prolixibacteraceae	Tangfeifania
DN25683_c0_g1	325	126	8	5.1	DN25683_c0_g1_i1	G126879	G1268791		325	126	8	5.08	100	CDS	324	86.11	1	malate dehydrogenase (oxaloacetate-decarboxylating)(NADP+)	KO:K00029	Bacteria	Bacteroidetes	Bacteroidia	Marinilabiliales	Prolixibacteraceae	Tangfeifania
DN35820_c0_g1	204	24.6	4	13	DN35820_c0_g1_i1	G100981	G1009811		204	24.6	4	13.02	100	CDS	201	88.06	-1	UDP-glucuronate decarboxylase	KO:K08678	Bacteria	Bacteroidetes	Bacteroidia	Marinilabiliales	Prolixibacteraceae	Tangfeifania
DN36933_c0_g1	213	29.6	2	5.4	DN36933_c0_g1_i1	G103518	G1035181		213	29.64	2	5.4	100	CDS	210	56.14	1	HP	HPrule	Bacteria	Bacteroidetes	Bacteroidia	Marinilabiliales	Prolixibacteraceae	Tangfeifania
DN37562_c0_g1	492	293	9	2.5	DN37562_c0_g1_i1	G139468	G1394681		492	293	9	2.46	100	CDS	489	83.95	1	preprotein translocase subunit SecA	KO:K03070	Bacteria	Bacteroidetes	Bacteroidia	Marinilabiliales	Prolixibacteraceae	Tangfeifania
DN38633_c0_g1	272	74.2	5	5.4	DN38633_c0_g1_i1	G118330	G1183301		272	74.24	5	5.39	100	CDS	270	36.25	-1	HP	HPrule	Bacteria	Bacteroidetes	Bacteroidia	Marinilabiliales	Prolixibacteraceae	Tangfeifania
DN49779_c0_g1	212	29.1	3	8.3	DN49779_c0_g1_i1	G103327	G1033271		212	29.05	3	8.27	100	CDS	210	97.14	1	HP	KO:K07089	Bacteria	Bacteroidetes	Bacteroidia	Marinilabiliales	Prolixibacteraceae	Tangfeifania
DN11919_c0_g1	1021	822	36	3.5	DN11919_c0_g1_i1	G147956	G1479561	1	1021	822	36	3.51	100	CDS	696	74.57	-1	cytochrome c	pfam11783	Bacteria	Bacteroidetes	Bacteroidia	Marinilabiliales	Prolixibacteraceae
DN11919_c0_g1	1021	822	36	3.5	DN11919_c0_g1_i1	G147956	G1479562	2	1021	822	36	3.51	100	CDS	333	61.32	-1	HP	HPrule	Bacteria	Bacteroidetes	Bacteroidia	Marinilabiliales	Prolixibacteraceae
DN1994_c0_g1	567	368	9	2	DN1994_c0_g1_i1	G142023	G1420231	1	567	368	9	1.96	100	CDS	153	69.57	1	cytochrome c oxidase subunit 2	KO:K02275	Bacteria	Bacteroidetes	Bacteroidia	Marinilabiliales	Prolixibacteraceae
DN1994_c0_g1	567	368	9	2	DN1994_c0_g1_i1	G142023	G1420232	2	567	368	9	1.96	100	CDS	423	47.62	1	cytochrome c oxidase subunit 2	KO:K02275	Bacteria	Bacteroidetes	Bacteroidia	Marinilabiliales	Prolixibacteraceae
DN24746_c0_g1	650	451	19	3.4	DN24746_c0_g1_i1	G143996	G1439961	1	650	451	19	3.37	100	CDS	504	77.11	1	uncharacterized protein (DUF1015 family)	COG4198	Bacteria	Bacteroidetes	Bacteroidia	Marinilabiliales	Prolixibacteraceae
DN24746_c0_g1	650	451	19	3.4	DN24746_c0_g1_i1	G143996	G1439962	2	650	451	19	3.37	100	CDS	132	70.45	1	HP	HPrule	Bacteria	Bacteroidetes	Bacteroidia	Marinilabiliales	Prolixibacteraceae
DN11864_c0_g1	370	171	6	2.8	DN11864_c0_g1_i1	G131735	G1317351		370	171	6	2.81	100	CDS	369	63.49	-1	HP	KO:K07004	Bacteria	Bacteroidetes	Bacteroidia	Marinilabiliales	Salinivirgaceae	Salinivirga
DN13656_c0_g1	304	105	6	4.6	DN13656_c0_g1_i1	G123986	G1239861		304	105	6	4.58	100	CDS	300	67.37	-1	acetylglutamate kinase	KO:K00930	Bacteria	Bacteroidetes	Bacteroidia	Marinilabiliales	Salinivirgaceae	Salinivirga
DN13690_c0_g1	247	53.1	4	6	DN13690_c0_g1_i1	G112667	G1126671		247	53.07	4	6.04	100	CDS	246	65.88	1	HP	HPrule	Bacteria	Bacteroidetes	Bacteroidia	Marinilabiliales	Salinivirgaceae	Salinivirga
DN14722_c0_g1	636	437	26	4.8	DN14722_c0_g1_i1	G143704	G1437041		636	437	26	4.76	100	CDS	615	82.72	-1	6-phosphofructokinase 1	KO:K00850	Bacteria	Bacteroidetes	Bacteroidia	Marinilabiliales	Salinivirgaceae	Salinivirga
DN15995_c0_g1	202	23.6	2	6.8	DN15995_c0_g1_i1	G100357	G1003571		202	23.55	2	6.8	100	CDS	198	53.12	1	HP	HPrule	Bacteria	Bacteroidetes	Bacteroidia	Marinilabiliales	Salinivirgaceae	Salinivirga
DN16469_c0_g1	290	91.1	4	3.5	DN16469_c0_g1_i1	G121641	G1216411		290	91.14	4	3.51	100	CDS	288	85.42	1	transcription termination factor Rho	KO:K03628	Bacteria	Bacteroidetes	Bacteroidia	Marinilabiliales	Salinivirgaceae	Salinivirga
DN16891_c0_g1	407	208	6	2.3	DN16891_c0_g1_i1	G134699	G1346991		407	208	6	2.31	100	CDS	405	75.19	1	urocanate hydratase	KO:K01712	Bacteria	Bacteroidetes	Bacteroidia	Marinilabiliales	Salinivirgaceae	Salinivirga
DN18243_c0_g1	219	33.3	4	9.6	DN18243_c0_g1_i1	G105121	G1051211		219	33.27	4	9.63	100	CDS	216	51.43	1	HP	HPrule	Bacteria	Bacteroidetes	Bacteroidia	Marinilabiliales	Salinivirgaceae	Salinivirga
DN19532_c0_g1	220	33.9	3	7.1	DN19532_c0_g1_i1	G105425	G1054251		220	33.9	3	7.09	100	CDS	219	73.97	1	glutamyl-tRNA(Gln) amidotransferase subunit E	KO:K03330	Bacteria	Bacteroidetes	Bacteroidia	Marinilabiliales	Salinivirgaceae	Salinivirga
DN19537_c0_g1	636	437	11	2	DN19537_c0_g1_i1	G143708	G1437081		636	437	11	2.02	100	CDS	624	54.03	1	cleaved adhesin domain-containing protein	pfam07675	Bacteria	Bacteroidetes	Bacteroidia	Marinilabiliales	Salinivirgaceae	Salinivirga
DN20071_c0_g1	744	545	14	2.1	DN20071_c0_g1_i1	G145524	G1455241		744	545	14	2.06	100	CDS	744	51.76	1	sortilin (neurotensin receptor 3)	pfam15902	Bacteria	Bacteroidetes	Bacteroidia	Marinilabiliales	Salinivirgaceae	Salinivirga
DN20359_c0_g1	344	145	3	1.7	DN20359_c0_g1_i1	G129205	G1292051		344	145	3	1.66	100	CDS	276	62.07	-1	acetyl-CoA C-acetyltransferase/acetyl-CoA acyltransferase	KO:K00626,KO:K00632	Bacteria	Bacteroidetes	Bacteroidia	Marinilabiliales	Salinivirgaceae	Salinivirga
DN2097_c0_g1	302	103	7	5.4	DN2097_c0_g1_i1	G123699	G1236991		302	103	7	5.44	100	CDS	300	47	1	HP	HPrule	Bacteria	Bacteroidetes	Bacteroidia	Marinilabiliales	Salinivirgaceae	Salinivirga
DN22437_c0_g1	275	77	4	4.2	DN22437_c0_g1_i1	G118854	G1188541		275	76.97	4	4.16	100	CDS	273	51.9	1	HP	HPrule	Bacteria	Bacteroidetes	Bacteroidia	Marinilabiliales	Salinivirgaceae	Salinivirga
DN22440_c0_g1	292	93.1	8	6.9	DN22440_c0_g1_i1	G122022	G1220221		292	93.08	8	6.88	100	CDS	288	61.46	-1	HP	HPrule	Bacteria	Bacteroidetes	Bacteroidia	Marinilabiliales	Salinivirgaceae	Salinivirga
DN22474_c0_g1	260	63.7	4	5	DN22474_c0_g1_i1	G115760	G1157601		260	63.71	4	5.03	100	CDS	192	57.14	1	HP	HPrule	Bacteria	Bacteroidetes	Bacteroidia	Marinilabiliales	Salinivirgaceae	Salinivirga
DN24388_c0_g1	342	143	8	4.5	DN24388_c0_g1_i1	G128991	G1289911		342	143	8	4.48	100	CDS	339	39.05	-1	lipopolysaccharide export system permease protein	KO:K07091	Bacteria	Bacteroidetes	Bacteroidia	Marinilabiliales	Salinivirgaceae	Salinivirga
DN26078_c0_g1	410	211	7	2.7	DN26078_c0_g1_i1	G134937	G1349371		410	211	7	2.66	100	CDS	408	62.5	-1	nitrate/nitrite transporter NarK	COG2223	Bacteria	Bacteroidetes	Bacteroidia	Marinilabiliales	Salinivirgaceae	Salinivirga
DN28200_c0_g1	553	354	8	1.8	DN28200_c0_g1_i1	G141603	G1416031		553	354	8	1.81	100	CDS	549	82.51	1	tyrosyl-tRNA synthetase	KO:K01866	Bacteria	Bacteroidetes	Bacteroidia	Marinilabiliales	Salinivirgaceae	Salinivirga
DN28729_c0_g1	307	108	9	6.7	DN28729_c0_g1_i1	G124462	G1244621		307	108	9	6.67	100	CDS	258	43.75	1	HP	HPrule	Bacteria	Bacteroidetes	Bacteroidia	Marinilabiliales	Salinivirgaceae	Salinivirga
DN28794_c0_g1	270	72.4	5	5.5	DN28794_c0_g1_i1	G117914	G1179141		270	72.44	5	5.53	100	CDS	270	50	-1	HP	HPrule	Bacteria	Bacteroidetes	Bacteroidia	Marinilabiliales	Salinivirgaceae	Salinivirga
DN29054_c0_g1	208	26.8	5	15	DN29054_c0_g1_i1	G102091	G1020911		208	26.77	5	14.95	100	CDS	180	77.97	1	HP	HPrule	Bacteria	Bacteroidetes	Bacteroidia	Marinilabiliales	Salinivirgaceae	Salinivirga
DN30266_c0_g1	267	69.8	3	3.4	DN30266_c0_g1_i1	G117305	G1173051		267	69.78	3	3.44	100	CDS	264	62.5	-1	outer membrane protein TolC	COG1538	Bacteria	Bacteroidetes	Bacteroidia	Marinilabiliales	Salinivirgaceae	Salinivirga
DN31416_c0_g1	357	158	6	3	DN31416_c0_g1_i1	G130525	G1305251		357	158	6	3.04	100	CDS	354	57.14	1	uncharacterized protein DUF5017	pfam16409	Bacteria	Bacteroidetes	Bacteroidia	Marinilabiliales	Salinivirgaceae	Salinivirga
DN31446_c0_g1	620	421	12	2.3	DN31446_c0_g1_i1	G143375	G1433751		620	421	12	2.28	100	CDS	618	52.2	1	HP	HPrule	Bacteria	Bacteroidetes	Bacteroidia	Marinilabiliales	Salinivirgaceae	Salinivirga
DN31847_c0_g1	1384	1185	47	3.2	DN31847_c0_g1_i1	G149423	G1494231		1384	1185	47	3.18	100	CDS	1380	42.86	1	HP	HPrule	Bacteria	Bacteroidetes	Bacteroidia	Marinilabiliales	Salinivirgaceae	Salinivirga
DN32531_c0_g1	307	108	10	7.4	DN32531_c0_g1_i1	G124469	G1244691		307	108	10	7.41	100	CDS	279	63.74	1	pimeloyl-ACP methyl ester carboxylesterase	COG0596	Bacteria	Bacteroidetes	Bacteroidia	Marinilabiliales	Salinivirgaceae	Salinivirga
DN32711_c0_g1	255	59.5	6	8.1	DN32711_c0_g1_i1	G114682	G1146821		255	59.52	6	8.07	100	CDS	252	50	1	uridine kinase	KO:K00876	Bacteria	Bacteroidetes	Bacteroidia	Marinilabiliales	Salinivirgaceae	Salinivirga
DN33568_c0_g1	376	177	13	5.9	DN33568_c0_g1_i1	G132290	G1322901		376	177	13	5.88	100	CDS	372	69.35	-1	regulator of protease activity HflC (stomatin/prohibitin superfamily)	COG0330	Bacteria	Bacteroidetes	Bacteroidia	Marinilabiliales	Salinivirgaceae	Salinivirga
DN33811_c0_g1	286	87.3	6	5.5	DN33811_c0_g1_i1	G121002	G1210021		286	87.28	6	5.5	100	CDS	285	46.32	1	YXYXY domain-containing protein	pfam07495	Bacteria	Bacteroidetes	Bacteroidia	Marinilabiliales	Salinivirgaceae	Salinivirga
DN34958_c0_g1	212	29.1	3	8.3	DN34958_c0_g1_i1	G103233	G1032331		212	29.05	3	8.27	100	CDS	210	59.42	-1	HP	HPrule	Bacteria	Bacteroidetes	Bacteroidia	Marinilabiliales	Salinivirgaceae	Salinivirga
DN35937_c0_g1	223	35.8	5	11.2	DN35937_c0_g1_i1	G106355	G1063551		223	35.82	5	11.18	100	CDS	222	56.94	1	copper chaperone CopZ	COG2608	Bacteria	Bacteroidetes	Bacteroidia	Marinilabiliales	Salinivirgaceae	Salinivirga
DN36141_c0_g1	292	93.1	4	3.4	DN36141_c0_g1_i1	G122069	G1220691		292	93.08	4	3.44	100	CDS	246	45.78	-1	HP	HPrule	Bacteria	Bacteroidetes	Bacteroidia	Marinilabiliales	Salinivirgaceae	Salinivirga
DN37824_c0_g1	547	348	10	2.3	DN37824_c0_g1_i1	G141424	G1414241		547	348	10	2.3	100	CDS	543	64.8	1	HP	HPrule	Bacteria	Bacteroidetes	Bacteroidia	Marinilabiliales	Salinivirgaceae	Salinivirga
DN38319_c0_g1	314	115	5	3.5	DN38319_c0_g1_i1	G125478	G1254781		314	115	5	3.48	100	CDS	312	68.33	1	membrane-bound serine protease (ClpP class)	KO:K07403	Bacteria	Bacteroidetes	Bacteroidia	Marinilabiliales	Salinivirgaceae	Salinivirga
DN38812_c0_g1	225	37.1	3	6.5	DN38812_c0_g1_i1	G106902	G1069021		225	37.13	3	6.47	100	CDS	222	79.31	1	DNA (cytosine-5)-methyltransferase 1	KO:K00558	Bacteria	Bacteroidetes	Bacteroidia	Marinilabiliales	Salinivirgaceae	Salinivirga
DN39862_c0_g1	289	90.2	6	5.3	DN39862_c0_g1_i1	G121541	G1215411	1	289	90.17	6	5.33	100	CDS	159	86	1	HP	HPrule	Bacteria	Bacteroidetes	Bacteroidia	Marinilabiliales	Salinivirgaceae	Salinivirga
DN39862_c0_g1	289	90.2	6	5.3	DN39862_c0_g1_i1	G121541	G1215412	2	289	90.17	6	5.33	100	CDS	108	83.33	1	HP	HPrule	Bacteria	Bacteroidetes	Bacteroidia	Marinilabiliales	Salinivirgaceae	Salinivirga
DN40485_c0_g1	234	43.3	3	5.6	DN40485_c0_g1_i1	G109300	G1093001		234	43.32	3	5.55	100	CDS	231	68.42	1	peptidase-like protein	pfam07687	Bacteria	Bacteroidetes	Bacteroidia	Marinilabiliales	Salinivirgaceae	Salinivirga
DN40782_c0_g1	251	56.3	4	5.7	DN40782_c0_g1_i1	G113836	G1138361		251	56.26	4	5.69	100	CDS	249	43.1	-1	PAS domain-containing protein	COG2202	Bacteria	Bacteroidetes	Bacteroidia	Marinilabiliales	Salinivirgaceae	Salinivirga
DN42051_c0_g1	253	57.9	5	6.9	DN42051_c0_g1_i1	G114287	G1142871		253	57.88	5	6.92	100	CDS	249	55.7	1	DNA-binding transcriptional regulator GbsR (MarR family)	COG1510	Bacteria	Bacteroidetes	Bacteroidia	Marinilabiliales	Salinivirgaceae	Salinivirga
DN42714_c0_g1	252	57.1	4	5.6	DN42714_c0_g1_i1	G114058	G1140581		252	57.06	4	5.61	100	CDS	249	60.76	-1	HP	HPrule	Bacteria	Bacteroidetes	Bacteroidia	Marinilabiliales	Salinivirgaceae	Salinivirga
DN42938_c0_g1	421	222	8	2.9	DN42938_c0_g1_i1	G135686	G1356861		421	222	8	2.89	100	CDS	417	45.26	1	HP	HPrule	Bacteria	Bacteroidetes	Bacteroidia	Marinilabiliales	Salinivirgaceae	Salinivirga
DN44801_c0_g1	206	25.7	4	12.5	DN44801_c0_g1_i1	G101584	G1015841		206	25.67	4	12.48	100	CDS	204	74.24	1	HP	HPrule	Bacteria	Bacteroidetes	Bacteroidia	Marinilabiliales	Salinivirgaceae	Salinivirga
DN45943_c0_g1	482	283	12	3.4	DN45943_c0_g1_i1	G139035	G1390351		482	283	12	3.4	100	CDS	480	58.82	-1	endonuclease I	COG2356	Bacteria	Bacteroidetes	Bacteroidia	Marinilabiliales	Salinivirgaceae	Salinivirga
DN46411_c0_g1	225	37.1	3	6.5	DN46411_c0_g1_i1	G106946	G1069461		225	37.13	3	6.47	100	CDS	222	63.38	-1	adenylate kinase	KO:K00939	Bacteria	Bacteroidetes	Bacteroidia	Marinilabiliales	Salinivirgaceae	Salinivirga
DN49259_c0_g1	309	110	6	4.4	DN49259_c0_g1_i1	G124804	G1248041		309	110	6	4.37	100	CDS	309	40	-1	HP	HPrule	Bacteria	Bacteroidetes	Bacteroidia	Marinilabiliales	Salinivirgaceae	Salinivirga
DN49699_c0_g1	317	118	5	3.4	DN49699_c0_g1_i1	G125929	G1259291		317	118	5	3.39	100	CDS	87	88.89	1	HP	HPrule	Bacteria	Bacteroidetes	Bacteroidia	Marinilabiliales	Salinivirgaceae	Salinivirga
DN5638_c0_g1	270	72.4	3	3.3	DN5638_c0_g1_i1	G117997	G1179971		270	72.44	3	3.32	100	CDS	270	34.44	1	tetratricopeptide (TPR) repeat protein	COG0457	Bacteria	Bacteroidetes	Bacteroidia	Marinilabiliales	Salinivirgaceae	Salinivirga
DN5919_c0_g1	935	736	42	4.6	DN5919_c0_g1_i1	G147392	G1473921		935	736	42	4.57	100	CDS	933	61.04	1	electron transfer flavoprotein alpha subunit	KO:K03522	Bacteria	Bacteroidetes	Bacteroidia	Marinilabiliales	Salinivirgaceae	Salinivirga
DN6483_c0_g1	1569	1370	93	5.4	DN6483_c0_g1_i1	G149860	G1498601		1569	1370	93	5.44	100	CDS	1458	63.77	1	dipeptidase D	KO:K01270	Bacteria	Bacteroidetes	Bacteroidia	Marinilabiliales	Salinivirgaceae	Salinivirga
DN7548_c0_g1	1112	913	21	1.8	DN7548_c0_g1_i1	G148450	G1484501		1112	913	21	1.84	100	CDS	1110	71.54	-1	ATP-dependent helicase YprA (DUF1998 family)	COG1205	Bacteria	Bacteroidetes	Bacteroidia	Marinilabiliales	Salinivirgaceae	Salinivirga
DN9110_c0_g1	2527	2328	206	7.1	DN9110_c0_g1_i1	G150781	G1507811		2527	2328	206	7.09	100	CDS	2448	42.17	-1	HP	HPrule	Bacteria	Bacteroidetes	Bacteroidia	Marinilabiliales	Salinivirgaceae	Salinivirga
DN12876_c0_g1	1006	807	62	6.2	DN12876_c0_g1_i1	G147863	G1478631	1	1006	807	62	6.15	100	CDS	93	#N/A	-1	HP	HPrule	Bacteria	Bacteroidetes	Bacteroidia	Marinilabiliales
DN12876_c0_g1	1006	807	62	6.2	DN12876_c0_g1_i1	G147863	G1478632	2	1006	807	62	6.15	100	CDS	618	53.96	-1	thiosulfate reductase cytochrome b subunit	KO:K08354	Bacteria	Bacteroidetes	Bacteroidia	Marinilabiliales
DN12876_c0_g1	1006	807	62	6.2	DN12876_c0_g1_i1	G147863	G1478633	3	1006	807	62	6.15	100	CDS	294	55.1	-1	HP	HPrule	Bacteria	Bacteroidetes	Bacteroidia	Marinilabiliales
DN1501_c0_g1	2162	1963	96	3.9	DN1501_c0_g1_i1	G150568	G1505681	1	2162	1963	96	3.92	100	CDS	1095	72.96	1	phosphoserine aminotransferase	KO:K00831	Bacteria	Bacteroidetes	Bacteroidia	Marinilabiliales
DN1501_c0_g1	2162	1963	96	3.9	DN1501_c0_g1_i1	G150568	G1505682	2	2162	1963	96	3.92	100	CDS	918	64.71	1	D-3-phosphoglycerate dehydrogenase	KO:K00058	Bacteria	Bacteroidetes	Bacteroidia	Marinilabiliales
DN17525_c0_g1	1488	1289	220	13.7	DN17525_c0_g1_i1	G149701	G1497011	1	1488	1289	220	13.67	100	CDS	375	#N/A	-1	HP	HPrule	Bacteria	Bacteroidetes	Bacteroidia	Marinilabiliales
DN17525_c0_g1	1488	1289	220	13.7	DN17525_c0_g1_i1	G149701	G1497012	2	1488	1289	220	13.67	100	CDS	453	65.56	-1	cold shock CspA family protein	COG1278	Bacteria	Bacteroidetes	Bacteroidia	Marinilabiliales
DN17525_c0_g1	1488	1289	220	13.7	DN17525_c0_g1_i1	G149701	G1497013	3	1488	1289	220	13.67	100	CDS	267	68.29	-1	RNA recognition motif-containing protein	COG0724	Bacteria	Bacteroidetes	Bacteroidia	Marinilabiliales
DN17525_c0_g1	1488	1289	220	13.7	DN17525_c0_g1_i1	G149701	G1497014	4	1488	1289	220	13.67	100	CDS	153	#N/A	1	HP	HPrule	Bacteria	Bacteroidetes	Bacteroidia	Marinilabiliales
DN18743_c0_g1	1039	840	32	3.1	DN18743_c0_g1_i1	G148060	G1480601	1	1039	840	32	3.05	100	CDS	405	52.17	-1	HP	KO:K09939	Bacteria	Bacteroidetes	Bacteroidia	Marinilabiliales
DN18743_c0_g1	1039	840	32	3.1	DN18743_c0_g1_i1	G148060	G1480602	2	1039	840	32	3.05	100	CDS	570	32.49	-1	HP	HPrule	Bacteria	Bacteroidetes	Bacteroidia	Marinilabiliales
DN6790_c0_g1	1253	1054	56	4.3	DN6790_c0_g1_i1	G149012	G1490121	1	1253	1054	56	4.25	100	CDS	720	72.08	-1	citrate synthase	KO:K01647	Bacteria	Bacteroidetes	Bacteroidia	Marinilabiliales
DN6790_c0_g1	1253	1054	56	4.3	DN6790_c0_g1_i1	G149012	G1490122	2	1253	1054	56	4.25	100	CDS	519	83.43	-1	isocitrate dehydrogenase	KO:K00031	Bacteria	Bacteroidetes	Bacteroidia	Marinilabiliales
DN9197_c0_g1	3698	3499	600	13.7	DN9197_c0_g1_i1	G151089	G1510891	1	3698	3499	600	13.73	100	CDS	681	52.08	-1	cytochrome c3-like protein	pfam14537	Bacteria	Bacteroidetes	Bacteroidia	Marinilabiliales
DN9197_c0_g1	3698	3499	600	13.7	DN9197_c0_g1_i1	G151089	G1510892	2	3698	3499	600	13.73	100	CDS	420	60.58	-1	mono/diheme cytochrome c family protein	COG2010	Bacteria	Bacteroidetes	Bacteroidia	Marinilabiliales
DN9197_c0_g1	3698	3499	600	13.7	DN9197_c0_g1_i1	G151089	G1510893	3	3698	3499	600	13.73	100	CDS	870	58.28	-1	HP	HPrule	Bacteria	Bacteroidetes	Bacteroidia	Marinilabiliales
DN9197_c0_g1	3698	3499	600	13.7	DN9197_c0_g1_i1	G151089	G1510894	4	3698	3499	600	13.73	100	CDS	393	48.06	-1	HP	HPrule	Bacteria	Bacteroidetes	Bacteroidia	Marinilabiliales
DN9197_c0_g1	3698	3499	600	13.7	DN9197_c0_g1_i1	G151089	G1510895	5	3698	3499	600	13.73	100	CDS	1041	40.57	-1	HP	HPrule	Bacteria	Bacteroidetes	Bacteroidia	Marinilabiliales
DN11773_c0_g1	389	190	10	4.2	DN11773_c0_g1_i1	G133371	G1333711	1	389	190	10	4.21	100	CDS	159	76.47	-1	alpha-amylase	KO:K07405	Bacteria	Bacteroidetes	Bacteroidia
DN11773_c0_g1	389	190	10	4.2	DN11773_c0_g1_i1	G133371	G1333712	2	389	190	10	4.21	100	CDS	216	59.38	-1	HP	HPrule	Bacteria	Bacteroidetes	Bacteroidia
DN12198_c0_g1	1003	804	37	3.7	DN12198_c0_g1_i1	G147843	G1478431	1	1003	804	37	3.69	100	CDS	228	56	1	HP	HPrule	Bacteria	Bacteroidetes	Bacteroidia
DN12198_c0_g1	1003	804	37	3.7	DN12198_c0_g1_i1	G147843	G1478432	2	1003	804	37	3.69	100	CDS	771	41.15	-1	SH3 domain-containing protein/SH3 domain-containing protein	pfam13457,pfam13457	Bacteria	Bacteroidetes	Bacteroidia
DN13474_c0_g1	545	346	13	3	DN13474_c0_g1_i1	G141336	G1413361	1	545	346	13	3.01	100	CDS	144	67.39	1	hypoxanthine phosphoribosyltransferase	KO:K00760	Bacteria	Bacteroidetes	Bacteroidia
DN13474_c0_g1	545	346	13	3	DN13474_c0_g1_i1	G141336	G1413362	2	545	346	13	3.01	100	CDS	381	75.59	1	adenylate kinase	KO:K00939	Bacteria	Bacteroidetes	Bacteroidia
DN18838_c0_g1	1651	1452	116	6.4	DN18838_c0_g1_i1	G149987	G1499871	1	1651	1452	116	6.4	100	CDS	483	55.66	1	F-type H+-transporting ATPase subunit a	KO:K02108	Bacteria	Bacteroidetes	Bacteroidia
DN18838_c0_g1	1651	1452	116	6.4	DN18838_c0_g1_i1	G149987	G1499872	2	1651	1452	116	6.4	100	CDS	642	71.83	1	F-type H+-transporting ATPase subunit a	KO:K02108	Bacteria	Bacteroidetes	Bacteroidia
DN18838_c0_g1	1651	1452	116	6.4	DN18838_c0_g1_i1	G149987	G1499873	3	1651	1452	116	6.4	100	CDS	261	75.58	1	F-type H+-transporting ATPase subunit c	KO:K02110	Bacteria	Bacteroidetes	Bacteroidia
DN18838_c0_g1	1651	1452	116	6.4	DN18838_c0_g1_i1	G149987	G1499874	4	1651	1452	116	6.4	100	CDS	135	64.44	1	F-type H+-transporting ATPase subunit b	KO:K02109	Bacteria	Bacteroidetes	Bacteroidia
DN23936_c0_g1	762	563	21	3	DN23936_c0_g1_i1	G145742	G1457421	1	762	563	21	2.99	100	CDS	492	66.67	-1	phosphate butyryltransferase	KO:K00634	Bacteria	Bacteroidetes	Bacteroidia
DN23936_c0_g1	762	563	21	3	DN23936_c0_g1_i1	G145742	G1457422	2	762	563	21	2.99	100	CDS	171	62	-1	IgA peptidase M64	pfam09471	Bacteria	Bacteroidetes	Bacteroidia
DN25280_c0_g1	1008	809	40	4	DN25280_c0_g1_i1	G147874	G1478741	1	1008	809	40	3.96	100	CDS	249	89.16	-1	succinate dehydrogenase / fumarate reductase flavoprotein subunit	KO:K00239	Bacteria	Bacteroidetes	Bacteroidia
DN25280_c0_g1	1008	809	40	4	DN25280_c0_g1_i1	G147874	G1478742	2	1008	809	40	3.96	100	CDS	675	60.73	-1	succinate dehydrogenase / fumarate reductase cytochrome b subunit	KO:K00241	Bacteria	Bacteroidetes	Bacteroidia
DN37065_c0_g1	1408	1209	68	4.5	DN37065_c0_g1_i1	G149492	G1494921	1	1408	1209	68	4.5	100	CDS	873	83.79	1	ribonuclease Y	KO:K18682	Bacteria	Bacteroidetes	Bacteroidia
DN37065_c0_g1	1408	1209	68	4.5	DN37065_c0_g1_i1	G149492	G1494922	2	1408	1209	68	4.5	100	CDS	501	60.24	1	HP	HPrule	Bacteria	Bacteroidetes	Bacteroidia
DN38528_c0_g1	1036	837	29	2.8	DN38528_c0_g1_i1	G148040	G1480401	1	1036	837	29	2.77	100	CDS	486	53.09	-1	HP	HPrule	Bacteria	Bacteroidetes	Bacteroidia
DN38528_c0_g1	1036	837	29	2.8	DN38528_c0_g1_i1	G148040	G1480402	2	1036	837	29	2.77	100	CDS	540	65.36	-1	HP	HPrule	Bacteria	Bacteroidetes	Bacteroidia
DN43869_c0_g1	2772	2573	165	5.1	DN43869_c0_g1_i1	G150881	G1508811	1	2772	2573	165	5.14	100	CDS	267	78.82	-1	uncharacterized protein DUF3467	pfam11950	Bacteria	Bacteroidetes	Bacteroidia
DN43869_c0_g1	2772	2573	165	5.1	DN43869_c0_g1_i1	G150881	G1508812	2	2772	2573	165	5.14	100	CDS	2427	81.01	-1	DNA-directed RNA polymerase subunit beta'	KO:K03046	Bacteria	Bacteroidetes	Bacteroidia
DN44720_c0_g1	1868	1669	77	3.7	DN44720_c0_g1_i1	G150271	G1502711	1	1868	1669	77	3.69	100	CDS	567	86.7	1	Na+-transporting NADH:ubiquinone oxidoreductase subunit E	KO:K00350	Bacteria	Bacteroidetes	Bacteroidia
DN44720_c0_g1	1868	1669	77	3.7	DN44720_c0_g1_i1	G150271	G1502712	2	1868	1669	77	3.69	100	CDS	1263	78.5	1	Na+-transporting NADH:ubiquinone oxidoreductase subunit F	KO:K00351	Bacteria	Bacteroidetes	Bacteroidia
DN45219_c0_g1	403	204	7	2.8	DN45219_c0_g1_i1	G134457	G1344571	1	403	204	7	2.75	100	CDS	165	64.81	1	2-oxoglutarate ferredoxin oxidoreductase subunit alpha	KO:K00174	Bacteria	Bacteroidetes	Bacteroidia
DN45219_c0_g1	403	204	7	2.8	DN45219_c0_g1_i1	G134457	G1344572	2	403	204	7	2.75	100	CDS	234	73.97	1	2-oxoglutarate ferredoxin oxidoreductase subunit beta	KO:K00175	Bacteria	Bacteroidetes	Bacteroidia
DN46356_c0_g1	547	348	9	2.1	DN46356_c0_g1_i1	G141431	G1414311	1	547	348	9	2.07	100	CDS	219	63.64	1	D-glycero-D-manno-heptose 1,7-bisphosphate phosphatase	KO:K03273	Bacteria	Bacteroidetes	Bacteroidia
DN46356_c0_g1	547	348	9	2.1	DN46356_c0_g1_i1	G141431	G1414312	2	547	348	9	2.07	100	CDS	195	64.62	1	Na+/proline symporter	COG0591	Bacteria	Bacteroidetes	Bacteroidia
DN5615_c0_g1	1718	1519	77	4.1	DN5615_c0_g1_i1	G150093	G1500931	1	1718	1519	77	4.06	100	CDS	756	70.97	1	Fe-S cluster assembly ATP-binding protein	KO:K09013	Bacteria	Bacteroidetes	Bacteroidia
DN5615_c0_g1	1718	1519	77	4.1	DN5615_c0_g1_i1	G150093	G1500932	2	1718	1519	77	4.06	100	CDS	867	38.06	1	Fe-S cluster assembly protein SufD	KO:K09015	Bacteria	Bacteroidetes	Bacteroidia
DN30845_c0_g1	417	218	12	4.4	DN30845_c0_g1_i1	G135411	G1354111		417	218	12	4.41	100	CDS	405	68.89	1	DDE family transposase	pfam01609	Bacteria	Bacteroidetes	Chitinophagia	Chitinophagales	Chitinophagaceae	Arachidicoccus
DN10884_c1_g1	210	27.9	4	11.5	DN10884_c1_g1_i1	G102521	G1025211		210	27.9	4	11.48	100	CDS	156	79.59	-1	uncharacterized protein DUF1569	pfam07606	Bacteria	Bacteroidetes	Chitinophagia	Chitinophagales	Chitinophagaceae	Chitinophaga
DN13805_c0_g1	239	47	3	5.1	DN13805_c0_g1_i1	G110494	G1104941		239	46.96	3	5.12	100	CDS	237	40	-1	HP	HPrule	Bacteria	Bacteroidetes	Chitinophagia	Chitinophagales	Chitinophagaceae	Chitinophaga
DN15272_c0_g1	298	99	5	4	DN15272_c0_g1_i1	G123018	G1230181		298	99	5	4.04	100	CDS	294	79.59	-1	HP	HPrule	Bacteria	Bacteroidetes	Chitinophagia	Chitinophagales	Chitinophagaceae	Chitinophaga
DN16504_c0_g1	290	91.1	4	3.5	DN16504_c0_g1_i1	G121642	G1216421		290	91.14	4	3.51	100	CDS	288	56.18	1	glycogen debranching enzyme	COG3408	Bacteria	Bacteroidetes	Chitinophagia	Chitinophagales	Chitinophagaceae	Chitinophaga
DN26753_c0_g1	320	121	6	4	DN26753_c0_g1_i1	G126226	G1262261		320	121	6	3.97	100	CDS	318	65	-1	ATP-binding cassette subfamily B protein	KO:K06147	Bacteria	Bacteroidetes	Chitinophagia	Chitinophagales	Chitinophagaceae	Chitinophaga
DN27840_c0_g1	266	68.9	4	4.7	DN27840_c0_g1_i1	G117091	G1170911		266	68.9	4	4.65	100	CDS	264	77.27	1	ABC-2 type transport system ATP-binding protein	KO:K01990	Bacteria	Bacteroidetes	Chitinophagia	Chitinophagales	Chitinophagaceae	Chitinophaga
DN29445_c0_g1	202	23.6	3	10.2	DN29445_c0_g1_i1	G100420	G1004201		202	23.55	3	10.2	100	CDS	201	74.63	1	magnesium chelatase subunit I	KO:K03405	Bacteria	Bacteroidetes	Chitinophagia	Chitinophagales	Chitinophagaceae	Chitinophaga
DN31587_c0_g1	228	39.1	6	12.3	DN31587_c0_g1_i1	G107700	G1077001		228	39.14	6	12.27	100	CDS	114	55.56	-1	HP	HPrule	Bacteria	Bacteroidetes	Chitinophagia	Chitinophagales	Chitinophagaceae	Chitinophaga
DN34027_c0_g1	230	40.5	6	11.9	DN34027_c0_g1_i1	G108229	G1082291		230	40.51	6	11.86	100	CDS	228	72.37	1	adenine deaminase	KO:K01486	Bacteria	Bacteroidetes	Chitinophagia	Chitinophagales	Chitinophagaceae	Chitinophaga
DN34381_c0_g1	230	40.5	5	9.9	DN34381_c0_g1_i1	G108231	G1082311		230	40.51	5	9.88	100	CDS	228	49.35	-1	HlyD family secretion protein	KO:K02005	Bacteria	Bacteroidetes	Chitinophagia	Chitinophagales	Chitinophagaceae	Chitinophaga
DN39196_c0_g1	220	33.9	3	7.1	DN39196_c0_g1_i1	G105527	G1055271		220	33.9	3	7.09	100	CDS	216	65.71	1	HP	HPrule	Bacteria	Bacteroidetes	Chitinophagia	Chitinophagales	Chitinophagaceae	Chitinophaga
DN43209_c0_g1	211	28.5	6	16.9	DN43209_c0_g1_i1	G103004	G1030041		211	28.47	6	16.87	100	CDS	198	57.81	1	UPF0176 protein	KO:K07146	Bacteria	Bacteroidetes	Chitinophagia	Chitinophagales	Chitinophagaceae	Chitinophaga
DN43960_c0_g1	466	267	7	2.1	DN43960_c0_g1_i1	G138296	G1382961		466	267	7	2.1	100	CDS	465	25	1	CheY-like chemotaxis protein	COG0784	Bacteria	Bacteroidetes	Chitinophagia	Chitinophagales	Chitinophagaceae	Chitinophaga
DN47260_c0_g1	286	87.3	4	3.7	DN47260_c0_g1_i1	G121059	G1210591		286	87.28	4	3.67	100	CDS	285	71.58	-1	uncharacterized protein DUF2723	pfam11028	Bacteria	Bacteroidetes	Chitinophagia	Chitinophagales	Chitinophagaceae	Chitinophaga
DN46955_c0_g1	333	134	9	5.4	DN46955_c0_g1_i1	G128006	G1280061		333	134	9	5.38	100	CDS	330	54.13	-1	UDP-N-acetylglucosamine 2-epimerase (non-hydrolysing)	KO:K01791	Bacteria	Bacteroidetes	Chitinophagia	Chitinophagales	Chitinophagaceae	Crenotalea
DN48105_c0_g1	391	192	8	3.3	DN48105_c0_g1_i1	G133572	G1335721		391	192	8	3.34	100	CDS	387	72.87	-1	ADP-L-glycero-D-manno-heptose 6-epimerase	KO:K03274	Bacteria	Bacteroidetes	Chitinophagia	Chitinophagales	Chitinophagaceae	Filimonas
DN20561_c0_g1	304	105	5	3.8	DN20561_c0_g1_i1	G124009	G1240091		304	105	5	3.81	100	CDS	303	73.27	1	DNA recombination protein RmuC	KO:K09760	Bacteria	Bacteroidetes	Chitinophagia	Chitinophagales	Chitinophagaceae	Flavihumibacter
DN29555_c0_g1	222	35.2	4	9.1	DN29555_c0_g1_i1	G106027	G1060271		222	35.18	4	9.11	100	CDS	219	63.01	1	cell division protein FtsW	KO:K03588	Bacteria	Bacteroidetes	Chitinophagia	Chitinophagales	Chitinophagaceae	Flavihumibacter
DN43943_c0_g1	323	124	4	2.6	DN43943_c0_g1_i1	G126657	G1266571		323	124	4	2.58	100	CDS	291	55.79	-1	RNA polymerase sigma-70 factor (ECF subfamily)	KO:K03088	Bacteria	Bacteroidetes	Chitinophagia	Chitinophagales	Chitinophagaceae	Flavihumibacter
DN47626_c0_g1	252	57.1	4	5.6	DN47626_c0_g1_i1	G114078	G1140781		252	57.06	4	5.61	100	CDS	249	45	-1	HP	HPrule	Bacteria	Bacteroidetes	Chitinophagia	Chitinophagales	Chitinophagaceae	Flavihumibacter
DN15104_c0_g1	229	39.8	4	8	DN15104_c0_g1_i1	G107868	G1078681		229	39.82	4	8.04	100	CDS	228	73.68	-1	ABC-2 type transport system ATP-binding protein	KO:K01990	Bacteria	Bacteroidetes	Chitinophagia	Chitinophagales	Chitinophagaceae	Flavisolibacter
DN21815_c0_g1	495	296	16	4.3	DN21815_c0_g1_i1	G139565	G1395651		495	296	16	4.33	100	CDS	492	37.65	-1	HP	HPrule	Bacteria	Bacteroidetes	Chitinophagia	Chitinophagales	Chitinophagaceae	Flavisolibacter
DN24321_c0_g1	378	179	9	4	DN24321_c0_g1_i1	G132458	G1324581		378	179	9	4.03	100	CDS	276	41.76	1	phenylacetic acid degradation protein/carnitine operon protein CaiE	KO:K02617,KO:K08279	Bacteria	Bacteroidetes	Chitinophagia	Chitinophagales	Chitinophagaceae	Flavisolibacter
DN33608_c0_g1	507	308	9	2.3	DN33608_c0_g1_i1	G140079	G1400791		507	308	9	2.34	100	CDS	507	37.5	1	HP	HPrule	Bacteria	Bacteroidetes	Chitinophagia	Chitinophagales	Chitinophagaceae	Flavisolibacter
DN41587_c0_g1	203	24.1	4	13.3	DN41587_c0_g1_i1	G100739	G1007391		203	24.07	4	13.31	100	CDS	183	53.23	1	zinc protease	KO:K07263	Bacteria	Bacteroidetes	Chitinophagia	Chitinophagales	Chitinophagaceae	Flavisolibacter
DN26955_c0_g1	300	101	5	4	DN26955_c0_g1_i1	G123377	G1233771	1	300	101	5	3.96	100	CDS	189	49.09	1	Ca-activated chloride channel family protein	KO:K07114	Bacteria	Bacteroidetes	Chitinophagia	Chitinophagales	Chitinophagaceae	Hydrobacter
DN26955_c0_g1	300	101	5	4	DN26955_c0_g1_i1	G123377	G1233772	2	300	101	5	3.96	100	CDS	102	#N/A	-1	HP	HPrule	Bacteria	Bacteroidetes	Chitinophagia	Chitinophagales	Chitinophagaceae	Hydrobacter
DN36702_c0_g1	247	53.1	4	6	DN36702_c0_g1_i1	G112798	G1127981		247	53.07	4	6.04	100	CDS	246	31.71	1	HP	HPrule	Bacteria	Bacteroidetes	Chitinophagia	Chitinophagales	Chitinophagaceae	Hydrobacter
DN15711_c0_g1	267	69.8	5	5.7	DN15711_c0_g1_i1	G117245	G1172451	1	267	69.78	5	5.74	100	CDS	87	#N/A	1	HP	HPrule	Bacteria	Bacteroidetes	Chitinophagia	Chitinophagales	Chitinophagaceae	Hydrotalea
DN15711_c0_g1	267	69.8	5	5.7	DN15711_c0_g1_i1	G117245	G1172452	2	267	69.78	5	5.74	100	CDS	186	64.81	1	adenine-specific DNA-methyltransferase	KO:K07317	Bacteria	Bacteroidetes	Chitinophagia	Chitinophagales	Chitinophagaceae	Hydrotalea
DN23114_c0_g1	257	61.2	3	3.9	DN23114_c0_g1_i1	G115093	G1150931	1	257	61.18	3	3.93	100	CDS	102	#N/A	1	HP	HPrule	Bacteria	Bacteroidetes	Chitinophagia	Chitinophagales	Chitinophagaceae	Hydrotalea
DN23114_c0_g1	257	61.2	3	3.9	DN23114_c0_g1_i1	G115093	G1150932	2	257	61.18	3	3.93	100	CDS	138	80	1	HP	HPrule	Bacteria	Bacteroidetes	Chitinophagia	Chitinophagales	Chitinophagaceae	Hydrotalea
DN33300_c0_g1	407	208	17	6.5	DN33300_c0_g1_i1	G134726	G1347261		407	208	17	6.54	100	CDS	333	72.07	-1	protein-L-isoaspartate(D-aspartate) O-methyltransferase	KO:K00573	Bacteria	Bacteroidetes	Chitinophagia	Chitinophagales	Chitinophagaceae	Hydrotalea
DN36126_c0_g1	551	352	10	2.3	DN36126_c0_g1_i1	G141542	G1415421		551	352	10	2.27	100	CDS	261	60.98	1	HP	HPrule	Bacteria	Bacteroidetes	Chitinophagia	Chitinophagales	Chitinophagaceae	Niabella
DN38334_c0_g1	579	380	21	4.4	DN38334_c0_g1_i1	G142373	G1423731		579	380	21	4.43	100	CDS	579	45.55	1	hydroxymethylglutaryl-CoA lyase	KO:K01640	Bacteria	Bacteroidetes	Chitinophagia	Chitinophagales	Chitinophagaceae	Niabella
DN37339_c0_g1	489	290	10	2.8	DN37339_c0_g1_i1	G139348	G1393481		489	290	10	2.76	100	CDS	489	37.2	1	HP	HPrule	Bacteria	Bacteroidetes	Chitinophagia	Chitinophagales	Chitinophagaceae	Niastella
DN45575_c0_g1	271	73.3	5	5.5	DN45575_c0_g1_i1	G118185	G1181851		271	73.34	5	5.46	100	CDS	270	57.78	-1	oxygen-independent coproporphyrinogen-3 oxidase	KO:K02495	Bacteria	Bacteroidetes	Chitinophagia	Chitinophagales	Chitinophagaceae	Niastella
DN14497_c0_g1	247	53.1	3	4.5	DN14497_c0_g1_i1	G112673	G1126731		247	53.07	3	4.53	100	CDS	246	48.78	1	glycosyl transferase family 2	pfam00535	Bacteria	Bacteroidetes	Chitinophagia	Chitinophagales	Chitinophagaceae	Sediminibacterium
DN44770_c0_g1	597	398	26	5.2	DN44770_c0_g1_i1	G142843	G1428431		597	398	26	5.23	100	CDS	597	87.94	-1	F-type H+-transporting ATPase subunit alpha	KO:K02111	Bacteria	Bacteroidetes	Chitinophagia	Chitinophagales	Chitinophagaceae	Sediminibacterium
DN12650_c0_g1	276	77.9	4	4.1	DN12650_c0_g1_i1	G119017	G1190171		276	77.89	4	4.11	100	CDS	273	47.87	-1	predicted naringenin-chalcone synthase	COG3424	Bacteria	Bacteroidetes	Chitinophagia	Chitinophagales	Chitinophagaceae
DN25080_c0_g1	227	38.5	4	8.3	DN25080_c0_g1_i1	G107359	G1073591		227	38.47	4	8.33	100	CDS	225	81.08	1	HP	KO:K06997	Bacteria	Bacteroidetes	Chitinophagia	Chitinophagales	Chitinophagaceae
DN26996_c0_g1	227	38.5	5	10.4	DN26996_c0_g1_i1	G107366	G1073661		227	38.47	5	10.41	100	CDS	225	81.33	1	HP	HPrule	Bacteria	Bacteroidetes	Chitinophagia	Chitinophagales	Chitinophagaceae
DN29045_c0_g1	249	54.7	4	5.9	DN29045_c0_g1_i1	G113276	G1132761		249	54.65	4	5.86	100	CDS	249	44.58	-1	sensor histidine kinase YesM	COG2972	Bacteria	Bacteroidetes	Chitinophagia	Chitinophagales	Chitinophagaceae
DN30885_c0_g1	538	339	16	3.8	DN30885_c0_g1_i1	G141147	G1411471		538	339	16	3.78	100	CDS	462	71.43	1	glycosyltransferase involved in cell wall biosynthesis	COG0463	Bacteria	Bacteroidetes	Chitinophagia	Chitinophagales	Chitinophagaceae
DN35867_c0_g1	201	23	3	10.4	DN35867_c0_g1_i1	G100170	G1001701		201	23.03	3	10.43	100	CDS	198	80.3	-1	uncharacterized lipoprotein YddW (UPF0748 family)	COG1649	Bacteria	Bacteroidetes	Chitinophagia	Chitinophagales	Chitinophagaceae
DN41803_c0_g1	211	28.5	3	8.4	DN41803_c0_g1_i1	G102989	G1029891		211	28.47	3	8.44	100	CDS	207	82.35	-1	glycine dehydrogenase	KO:K00281	Bacteria	Bacteroidetes	Chitinophagia	Chitinophagales	Chitinophagaceae
DN15765_c0_g1	202	23.6	4	13.6	DN15765_c0_g1_i1	G100354	G1003541		202	23.55	4	13.6	100	CDS	201	76.92	1	uncharacterized sodium:solute symporter family permease YidK	COG4146	Bacteria	Bacteroidetes	Cytophagia	Cytophagales	Bernardetiaceae	Bernardetia
DN27419_c0_g1	213	29.6	3	8.1	DN27419_c0_g1_i1	G103462	G1034621		213	29.64	3	8.11	100	CDS	213	47.95	1	HP	HPrule	Bacteria	Bacteroidetes	Cytophagia	Cytophagales	Bernardetiaceae	Hugenholtzia
DN12282_c0_g1	291	92.1	5	4.4	DN12282_c0_g1_i1	G121804	G1218041		291	92.11	5	4.35	100	CDS	291	71.43	1	HP	HPrule	Bacteria	Bacteroidetes	Cytophagia	Cytophagales	Cyclobacteriaceae	Algoriphagus
DN15334_c0_g1	266	68.9	5	5.8	DN15334_c0_g1_i1	G117035	G1170351		266	68.9	5	5.81	100	CDS	243	81.25	-1	UDP-N-acetylglucosamine 1-carboxyvinyltransferase	KO:K00790	Bacteria	Bacteroidetes	Cytophagia	Cytophagales	Cyclobacteriaceae	Algoriphagus
DN15629_c0_g1	217	32	3	7.5	DN15629_c0_g1_i1	G104547	G1045471		217	32.04	3	7.5	100	CDS	183	55.17	1	HP	HPrule	Bacteria	Bacteroidetes	Cytophagia	Cytophagales	Cyclobacteriaceae	Algoriphagus
DN15842_c0_g1	247	53.1	3	4.5	DN15842_c0_g1_i1	G112678	G1126781		247	53.07	3	4.53	100	CDS	246	65.85	1	HP	HPrule	Bacteria	Bacteroidetes	Cytophagia	Cytophagales	Cyclobacteriaceae	Algoriphagus
DN16747_c0_g1	403	204	5	2	DN16747_c0_g1_i1	G134416	G1344161		403	204	5	1.96	100	CDS	216	45.45	1	oxepin-CoA hydrolase/3-oxo-5,6-dehydrosuberyl-CoA semialdehyde dehydrogenase	KO:K02618	Bacteria	Bacteroidetes	Cytophagia	Cytophagales	Cyclobacteriaceae	Algoriphagus
DN17497_c0_g1	268	70.7	4	4.5	DN17497_c0_g1_i1	G117447	G1174471		268	70.66	4	4.53	100	CDS	138	95.65	-1	HP	COG4898	Bacteria	Bacteroidetes	Cytophagia	Cytophagales	Cyclobacteriaceae	Algoriphagus
DN18341_c0_g1	399	200	7	2.8	DN18341_c0_g1_i1	G134139	G1341391		399	200	7	2.8	100	CDS	396	63.78	1	carboxylate-amine ligase	KO:K06048	Bacteria	Bacteroidetes	Cytophagia	Cytophagales	Cyclobacteriaceae	Algoriphagus
DN19577_c0_g1	478	279	16	4.6	DN19577_c0_g1_i1	G138852	G1388521		478	279	16	4.59	100	CDS	420	86.43	1	adenosylhomocysteinase	KO:K01251	Bacteria	Bacteroidetes	Cytophagia	Cytophagales	Cyclobacteriaceae	Algoriphagus
DN20514_c0_g1	376	177	6	2.7	DN20514_c0_g1_i1	G132272	G1322721		376	177	6	2.71	100	CDS	372	45.37	-1	uncharacterized protein DUF4842	pfam16130	Bacteria	Bacteroidetes	Cytophagia	Cytophagales	Cyclobacteriaceae	Algoriphagus
DN23617_c0_g1	244	50.7	3	4.7	DN23617_c0_g1_i1	G111920	G1119201		244	50.74	3	4.73	100	CDS	240	64.29	-1	HP	HPrule	Bacteria	Bacteroidetes	Cytophagia	Cytophagales	Cyclobacteriaceae	Algoriphagus
DN25122_c0_g1	380	181	6	2.7	DN25122_c0_g1_i1	G132637	G1326371		380	181	6	2.65	100	CDS	378	95.24	-1	GIY-YIG catalytic domain-containing protein	pfam01541	Bacteria	Bacteroidetes	Cytophagia	Cytophagales	Cyclobacteriaceae	Algoriphagus
DN25400_c0_g1	246	52.3	3	4.6	DN25400_c0_g1_i1	G112475	G1124751		246	52.29	3	4.59	100	CDS	243	97.53	-1	UDP-N-acetylglucosamine 2-epimerase	COG0381	Bacteria	Bacteroidetes	Cytophagia	Cytophagales	Cyclobacteriaceae	Algoriphagus
DN25826_c0_g1	366	167	8	3.8	DN25826_c0_g1_i1	G131384	G1313841		366	167	8	3.84	100	CDS	366	58.68	1	phosphoribosyl 1,2-cyclic phosphate phosphodiesterase	KO:K06167	Bacteria	Bacteroidetes	Cytophagia	Cytophagales	Cyclobacteriaceae	Algoriphagus
DN26499_c0_g1	203	24.1	2	6.7	DN26499_c0_g1_i1	G100664	G1006641		203	24.07	2	6.65	100	CDS	201	74.63	1	dolichol-phosphate mannosyltransferase	KO:K00721	Bacteria	Bacteroidetes	Cytophagia	Cytophagales	Cyclobacteriaceae	Algoriphagus
DN26746_c0_g1	258	62	4	5.2	DN26746_c0_g1_i1	G115311	G1153111		258	62.02	4	5.16	100	CDS	258	45.35	1	multidrug efflux system outer membrane protein	KO:K18139	Bacteria	Bacteroidetes	Cytophagia	Cytophagales	Cyclobacteriaceae	Algoriphagus
DN28011_c0_g1	270	72.4	7	7.7	DN28011_c0_g1_i1	G117906	G1179061		270	72.44	7	7.74	100	CDS	246	59.26	1	starvation-inducible DNA-binding protein	KO:K04047	Bacteria	Bacteroidetes	Cytophagia	Cytophagales	Cyclobacteriaceae	Algoriphagus
DN28384_c0_g1	211	28.5	7	19.7	DN28384_c0_g1_i1	G102926	G1029261		211	28.47	7	19.69	100	CDS	210	40	1	HP	HPrule	Bacteria	Bacteroidetes	Cytophagia	Cytophagales	Cyclobacteriaceae	Algoriphagus
DN28553_c0_g1	281	82.5	3	2.9	DN28553_c0_g1_i1	G120041	G1200411		281	82.54	3	2.91	100	CDS	279	77.42	-1	cobalt-zinc-cadmium resistance protein CzcA	KO:K15726	Bacteria	Bacteroidetes	Cytophagia	Cytophagales	Cyclobacteriaceae	Algoriphagus
DN31155_c0_g1	243	50	3	4.8	DN31155_c0_g1_i1	G111707	G1117071		243	49.97	3	4.81	100	CDS	240	87.5	-1	HP	HPrule	Bacteria	Bacteroidetes	Cytophagia	Cytophagales	Cyclobacteriaceae	Algoriphagus
DN31559_c0_g1	594	395	13	2.6	DN31559_c0_g1_i1	G142767	G1427671		594	395	13	2.64	100	CDS	591	54.82	1	NAD(P)-dependent dehydrogenase (short-subunit alcohol dehydrogenase family)	COG1028	Bacteria	Bacteroidetes	Cytophagia	Cytophagales	Cyclobacteriaceae	Algoriphagus
DN32577_c0_g1	234	43.3	1	1.9	DN32577_c0_g1_i1	G109256	G1092561		234	43.32	1	1.85	100	CDS	231	55.84	1	HP	HPrule	Bacteria	Bacteroidetes	Cytophagia	Cytophagales	Cyclobacteriaceae	Algoriphagus
DN33307_c0_g1	345	146	5	2.7	DN33307_c0_g1_i1	G129346	G1293461		345	146	5	2.74	100	CDS	114	77.78	1	HP	HPrule	Bacteria	Bacteroidetes	Cytophagia	Cytophagales	Cyclobacteriaceae	Algoriphagus
DN34596_c0_g1	226	37.8	3	6.4	DN34596_c0_g1_i1	G107142	G1071421		226	37.8	3	6.36	100	CDS	222	69.86	-1	phytoene/squalene synthetase	COG1562	Bacteria	Bacteroidetes	Cytophagia	Cytophagales	Cyclobacteriaceae	Algoriphagus
DN36222_c0_g1	225	37.1	3	6.5	DN36222_c0_g1_i1	G106887	G1068871		225	37.13	3	6.47	100	CDS	222	71.62	1	HP	HPrule	Bacteria	Bacteroidetes	Cytophagia	Cytophagales	Cyclobacteriaceae	Algoriphagus
DN38446_c0_g1	423	224	14	5	DN38446_c0_g1_i1	G135830	G1358301		423	224	14	5	100	CDS	423	84.4	1	adenosylhomocysteinase	KO:K01251	Bacteria	Bacteroidetes	Cytophagia	Cytophagales	Cyclobacteriaceae	Algoriphagus
DN38558_c0_g1	374	175	9	4.1	DN38558_c0_g1_i1	G132127	G1321271		374	175	9	4.12	100	CDS	372	56.45	1	metal-dependent amidase/aminoacylase/carboxypeptidase family protein	COG1473	Bacteria	Bacteroidetes	Cytophagia	Cytophagales	Cyclobacteriaceae	Algoriphagus
DN38819_c0_g1	313	114	13	9.1	DN38819_c0_g1_i1	G125334	G1253341		313	114	13	9.13	100	CDS	294	39.08	1	HP	HPrule	Bacteria	Bacteroidetes	Cytophagia	Cytophagales	Cyclobacteriaceae	Algoriphagus
DN39467_c0_g1	217	32	6	15	DN39467_c0_g1_i1	G104667	G1046671		217	32.04	6	15	100	CDS	216	51.47	1	phosphohistidine phosphatase	KO:K08296	Bacteria	Bacteroidetes	Cytophagia	Cytophagales	Cyclobacteriaceae	Algoriphagus
DN40297_c0_g1	234	43.3	3	5.6	DN40297_c0_g1_i1	G109297	G1092971		234	43.32	3	5.55	100	CDS	219	88.89	1	HP	HPrule	Bacteria	Bacteroidetes	Cytophagia	Cytophagales	Cyclobacteriaceae	Algoriphagus
DN40971_c0_g1	237	45.5	4	7	DN40971_c0_g1_i1	G110122	G1101221		237	45.49	4	7.04	100	CDS	234	63.64	1	HP	HPrule	Bacteria	Bacteroidetes	Cytophagia	Cytophagales	Cyclobacteriaceae	Algoriphagus
DN42686_c0_g1	210	27.9	3	8.6	DN42686_c0_g1_i1	G102722	G1027221		210	27.9	3	8.61	100	CDS	207	86.96	1	HP	HPrule	Bacteria	Bacteroidetes	Cytophagia	Cytophagales	Cyclobacteriaceae	Algoriphagus
DN43192_c0_g1	288	89.2	5	4.5	DN43192_c0_g1_i1	G121381	G1213811		288	89.2	5	4.49	100	CDS	228	69.64	-1	type I restriction enzyme M protein	KO:K03427	Bacteria	Bacteroidetes	Cytophagia	Cytophagales	Cyclobacteriaceae	Algoriphagus
DN43862_c0_g1	919	720	51	5.7	DN43862_c0_g1_i1	G147285	G1472851		919	720	51	5.67	100	CDS	852	77.66	-1	nitrate reductase alpha subunit	KO:K00370	Bacteria	Bacteroidetes	Cytophagia	Cytophagales	Cyclobacteriaceae	Algoriphagus
DN47556_c0_g1	275	77	4	4.2	DN47556_c0_g1_i1	G118966	G1189661		275	76.97	4	4.16	100	CDS	273	82.93	1	uncharacterized protein DUF4357	pfam14267	Bacteria	Bacteroidetes	Cytophagia	Cytophagales	Cyclobacteriaceae	Algoriphagus
DN48491_c0_g1	235	44	3	5.5	DN48491_c0_g1_i1	G109630	G1096301		235	44.04	3	5.46	100	CDS	231	88.31	-1	type I restriction enzyme M protein	KO:K03427	Bacteria	Bacteroidetes	Cytophagia	Cytophagales	Cyclobacteriaceae	Algoriphagus
DN49_c0_g1	1593	1394	96	5.5	DN49_c0_g1_i1	G149907	G1499071		1593	1394	96	5.51	100	CDS	1590	69.07	-1	1-pyrroline-5-carboxylate dehydrogenase	KO:K00294	Bacteria	Bacteroidetes	Cytophagia	Cytophagales	Cyclobacteriaceae	Algoriphagus
DN49070_c0_g1	255	59.5	3	4	DN49070_c0_g1_i1	G114765	G1147651		255	59.52	3	4.04	100	CDS	252	77.11	-1	DNA polymerase-3 subunit alpha	KO:K02337	Bacteria	Bacteroidetes	Cytophagia	Cytophagales	Cyclobacteriaceae	Algoriphagus
DN5125_c0_g1	378	179	5	2.2	DN5125_c0_g1_i1	G132503	G1325031		378	179	5	2.24	100	CDS	378	67.46	1	HP	KO:K00540	Bacteria	Bacteroidetes	Cytophagia	Cytophagales	Cyclobacteriaceae	Algoriphagus
DN13617_c0_g1	295	96	6	5	DN13617_c0_g1_i1	G122523	G1225231		295	96.03	6	5	100	CDS	291	30.61	-1	HP	HPrule	Bacteria	Bacteroidetes	Cytophagia	Cytophagales	Cyclobacteriaceae	Belliella
DN20859_c0_g1	327	128	4	2.5	DN20859_c0_g1_i1	G127126	G1271261		327	128	4	2.5	100	CDS	324	70.83	1	23S rRNA-intervening sequence protein	pfam05635	Bacteria	Bacteroidetes	Cytophagia	Cytophagales	Cyclobacteriaceae	Belliella
DN26380_c0_g1	370	171	11	5.2	DN26380_c0_g1_i1	G131766	G1317661		370	171	11	5.15	100	CDS	369	30.89	1	iron complex outermembrane receptor protein	KO:K02014	Bacteria	Bacteroidetes	Cytophagia	Cytophagales	Cyclobacteriaceae	Belliella
DN32268_c0_g1	468	269	8	2.4	DN32268_c0_g1_i1	G138380	G1383801		468	269	8	2.38	100	CDS	468	61.94	-1	HP	HPrule	Bacteria	Bacteroidetes	Cytophagia	Cytophagales	Cyclobacteriaceae	Belliella
DN32714_c0_g1	335	136	5	2.9	DN32714_c0_g1_i1	G128205	G1282051		335	136	5	2.94	100	CDS	333	100	1	cobalt-zinc-cadmium resistance protein CzcA	KO:K15726	Bacteria	Bacteroidetes	Cytophagia	Cytophagales	Cyclobacteriaceae	Belliella
DN39177_c0_g1	400	201	8	3.2	DN39177_c0_g1_i1	G134246	G1342461		400	201	8	3.19	100	CDS	399	76.69	-1	DNA (cytosine-5)-methyltransferase 1	KO:K00558	Bacteria	Bacteroidetes	Cytophagia	Cytophagales	Cyclobacteriaceae	Belliella
DN43173_c0_g1	281	82.5	4	3.9	DN43173_c0_g1_i1	G120101	G1201011		281	82.54	4	3.88	100	CDS	279	60.22	1	metal-dependent amidase/aminoacylase/carboxypeptidase family protein	COG1473	Bacteria	Bacteroidetes	Cytophagia	Cytophagales	Cyclobacteriaceae	Belliella
DN43873_c0_g1	233	42.6	5	9.4	DN43873_c0_g1_i1	G109057	G1090571		233	42.61	5	9.4	100	CDS	231	100	1	cobalt-zinc-cadmium resistance protein CzcA	KO:K15726	Bacteria	Bacteroidetes	Cytophagia	Cytophagales	Cyclobacteriaceae	Belliella
DN592_c0_g1	332	133	8	4.8	DN592_c0_g1_i1	G127885	G1278851		332	133	8	4.82	100	CDS	330	64.55	-1	type I restriction-modification system DNA methylase subunit	COG0286	Bacteria	Bacteroidetes	Cytophagia	Cytophagales	Cyclobacteriaceae	Belliella
DN31470_c0_g1	651	452	24	4.3	DN31470_c0_g1_i1	G144020	G1440201		651	452	24	4.25	100	CDS	651	82.16	-1	peroxiredoxin (alkyl hydroperoxide reductase subunit C)	KO:K03386	Bacteria	Bacteroidetes	Cytophagia	Cytophagales	Cyclobacteriaceae	Cecembia
DN35697_c0_g1	279	80.7	6	6	DN35697_c0_g1_i1	G119692	G1196921		279	80.67	6	5.96	100	CDS	246	80.25	1	23S rRNA-intervening sequence protein	pfam05635	Bacteria	Bacteroidetes	Cytophagia	Cytophagales	Cyclobacteriaceae	Cecembia
DN48720_c0_g1	236	44.8	10	17.9	DN48720_c0_g1_i1	G109904	G1099041		236	44.76	10	17.89	100	CDS	204	42.37	-1	HP	HPrule	Bacteria	Bacteroidetes	Cytophagia	Cytophagales	Cyclobacteriaceae	Cecembia
DN16632_c0_g1	229	39.8	4	8	DN16632_c0_g1_i1	G107880	G1078801		229	39.82	4	8.04	100	CDS	228	71.05	1	predicted nuclease of restriction endonuclease-like (RecB) superfamily	COG4804	Bacteria	Bacteroidetes	Cytophagia	Cytophagales	Cyclobacteriaceae	Cyclobacterium
DN22052_c0_g1	286	87.3	4	3.7	DN22052_c0_g1_i1	G120963	G1209631		286	87.28	4	3.67	100	CDS	285	72.04	-1	small-conductance mechanosensitive channel	COG0668	Bacteria	Bacteroidetes	Cytophagia	Cytophagales	Cyclobacteriaceae	Cyclobacterium
DN23030_c0_g1	423	224	7	2.5	DN23030_c0_g1_i1	G135808	G1358081		423	224	7	2.5	100	CDS	390	46.24	-1	HP	KO:K06889	Bacteria	Bacteroidetes	Cytophagia	Cytophagales	Cyclobacteriaceae	Cyclobacterium
DN23876_c0_g1	785	586	12	1.6	DN23876_c0_g1_i1	G145996	G1459961		785	586	12	1.64	100	CDS	783	35.98	-1	multidrug efflux pump subunit AcrB	COG0841	Bacteria	Bacteroidetes	Cytophagia	Cytophagales	Cyclobacteriaceae	Cyclobacterium
DN25215_c0_g1	231	41.2	5	9.7	DN25215_c0_g1_i1	G108465	G1084651	1	231	41.21	5	9.72	100	CDS	153	96	-1	HP	HPrule	Bacteria	Bacteroidetes	Cytophagia	Cytophagales	Cyclobacteriaceae	Cyclobacterium
DN25215_c0_g1	231	41.2	5	9.7	DN25215_c0_g1_i1	G108465	G1084652	2	231	41.21	5	9.72	100	CDS	81	#N/A	-1	HP	HPrule	Bacteria	Bacteroidetes	Cytophagia	Cytophagales	Cyclobacteriaceae	Cyclobacterium
DN31913_c0_g1	265	68	6	7.1	DN31913_c0_g1_i1	G116889	G1168891		265	68.02	6	7.06	100	CDS	261	52.33	-1	HP	HPrule	Bacteria	Bacteroidetes	Cytophagia	Cytophagales	Cyclobacteriaceae	Cyclobacterium
DN34098_c0_g1	237	45.5	3	5.3	DN34098_c0_g1_i1	G110075	G1100751		237	45.49	3	5.28	100	CDS	234	77.14	1	REP element-mobilizing transposase RayT	COG1943	Bacteria	Bacteroidetes	Cytophagia	Cytophagales	Cyclobacteriaceae	Cyclobacterium
DN35125_c0_g1	248	53.9	5	7.4	DN35125_c0_g1_i1	G113042	G1130421		248	53.86	5	7.43	100	CDS	246	78.05	1	predicted nuclease of restriction endonuclease-like (RecB) superfamily	COG4804	Bacteria	Bacteroidetes	Cytophagia	Cytophagales	Cyclobacteriaceae	Cyclobacterium
DN39007_c0_g1	364	165	6	2.9	DN39007_c0_g1_i1	G131231	G1312311		364	165	6	2.91	100	CDS	153	82.61	1	HP	HPrule	Bacteria	Bacteroidetes	Cytophagia	Cytophagales	Cyclobacteriaceae	Cyclobacterium
DN39782_c0_g1	258	62	4	5.2	DN39782_c0_g1_i1	G115389	G1153891		258	62.02	4	5.16	100	CDS	258	55.84	-1	Cu2+-exporting ATPase	KO:K01533	Bacteria	Bacteroidetes	Cytophagia	Cytophagales	Cyclobacteriaceae	Cyclobacterium
DN39816_c0_g1	281	82.5	4	3.9	DN39816_c0_g1_i1	G120087	G1200871		281	82.54	4	3.88	100	CDS	267	66.29	1	HP	HPrule	Bacteria	Bacteroidetes	Cytophagia	Cytophagales	Cyclobacteriaceae	Cyclobacterium
DN44682_c0_g1	642	443	25	4.5	DN44682_c0_g1_i1	G143846	G1438461		642	443	25	4.52	100	CDS	546	26.92	1	HP	HPrule	Bacteria	Bacteroidetes	Cytophagia	Cytophagales	Cyclobacteriaceae	Cyclobacterium
DN47055_c0_g1	328	129	6	3.7	DN47055_c0_g1_i1	G127346	G1273461		328	129	6	3.72	100	CDS	282	60.61	1	RNA polymerase sigma-70 factor (ECF subfamily)	KO:K03088	Bacteria	Bacteroidetes	Cytophagia	Cytophagales	Cyclobacteriaceae	Cyclobacterium
DN4939_c0_g1	700	501	17	2.7	DN4939_c0_g1_i1	G144877	G1448771		700	501	17	2.72	100	CDS	687	59.19	1	uncharacterized repeat protein	pfam09603	Bacteria	Bacteroidetes	Cytophagia	Cytophagales	Cyclobacteriaceae	Cyclobacterium
DN11892_c0_g1	372	173	8	3.7	DN11892_c0_g1_i1	G131897	G1318971		372	173	8	3.7	100	CDS	372	74.8	1	aconitate hydratase	KO:K01681	Bacteria	Bacteroidetes	Cytophagia	Cytophagales	Cyclobacteriaceae	Echinicola
DN12535_c0_g1	267	69.8	4	4.6	DN12535_c0_g1_i1	G117231	G1172311		267	69.78	4	4.59	100	CDS	264	88.64	1	DNA (cytosine-5)-methyltransferase 1	KO:K00558	Bacteria	Bacteroidetes	Cytophagia	Cytophagales	Cyclobacteriaceae	Echinicola
DN13990_c0_g1	414	215	6	2.2	DN13990_c0_g1_i1	G135183	G1351831		414	215	6	2.23	100	CDS	315	74	-1	aspartate 1-decarboxylase	KO:K01579	Bacteria	Bacteroidetes	Cytophagia	Cytophagales	Cyclobacteriaceae	Echinicola
DN16721_c0_g1	293	94.1	4	3.4	DN16721_c0_g1_i1	G122174	G1221741		293	94.06	4	3.41	100	CDS	192	49.21	1	UDP-N-acetylmuramate--alanine ligase	KO:K01924	Bacteria	Bacteroidetes	Cytophagia	Cytophagales	Cyclobacteriaceae	Echinicola
DN30644_c0_g1	587	388	16	3.3	DN30644_c0_g1_i1	G142571	G1425711		587	388	16	3.3	100	CDS	585	71.13	-1	maltose/moltooligosaccharide transporter	KO:K16211	Bacteria	Bacteroidetes	Cytophagia	Cytophagales	Cyclobacteriaceae	Echinicola
DN37373_c0_g1	349	150	11	5.9	DN37373_c0_g1_i1	G129717	G1297171		349	150	11	5.87	100	CDS	153	98	1	helix-turn-helix protein	pfam01381	Bacteria	Bacteroidetes	Cytophagia	Cytophagales	Cyclobacteriaceae	Echinicola
DN29186_c0_g1	337	138	4	2.3	DN29186_c0_g1_i1	G128438	G1284381	1	337	138	4	2.32	100	CDS	96	#N/A	1	HP	HPrule	Bacteria	Bacteroidetes	Cytophagia	Cytophagales	Cyclobacteriaceae	Indibacter
DN29186_c0_g1	337	138	4	2.3	DN29186_c0_g1_i1	G128438	G1284382	2	337	138	4	2.32	100	CDS	231	85.71	1	UDP-N-acetylglucosamine 2-epimerase	COG0381	Bacteria	Bacteroidetes	Cytophagia	Cytophagales	Cyclobacteriaceae	Indibacter
DN30610_c0_g1	455	256	7	2.2	DN30610_c0_g1_i1	G137680	G1376801		455	256	7	2.19	100	CDS	453	71.33	1	octaprenyl-diphosphate synthase	KO:K02523	Bacteria	Bacteroidetes	Cytophagia	Cytophagales	Cyclobacteriaceae	Indibacter
DN30446_c0_g1	491	292	9	2.5	DN30446_c0_g1_i1	G139415	G1394151		491	292	9	2.47	100	CDS	465	51.63	-1	dihydrofolate reductase	KO:K00287	Bacteria	Bacteroidetes	Cytophagia	Cytophagales	Cyclobacteriaceae	Lunatimonas
DN41967_c0_g1	347	148	6	3.3	DN41967_c0_g1_i1	G129543	G1295431		347	148	6	3.25	100	CDS	345	71.05	-1	sodium-dependent dicarboxylate transporter 2/3/5	KO:K14445	Bacteria	Bacteroidetes	Cytophagia	Cytophagales	Cyclobacteriaceae	Lunatimonas
DN47411_c0_g1	593	394	7	1.4	DN47411_c0_g1_i1	G142749	G1427491		593	394	7	1.42	100	CDS	591	30.85	-1	HP	HPrule	Bacteria	Bacteroidetes	Cytophagia	Cytophagales	Cyclobacteriaceae	Mongoliibacter
DN8806_c0_g1	470	271	17	5	DN8806_c0_g1_i1	G138515	G1385151	1	470	271	17	5.02	100	tRNA	74	#N/A	1	tRNA_Arg_TCT	tRNA	Bacteria	Bacteroidetes	Cytophagia	Cytophagales	Cyclobacteriaceae	Mongoliibacter
DN8806_c0_g1	470	271	17	5	DN8806_c0_g1_i1	G138515	G1385152	2	470	271	17	5.02	100	CDS	246	65	1	putative endonuclease	KO:K07461	Bacteria	Bacteroidetes	Cytophagia	Cytophagales	Cyclobacteriaceae	Mongoliibacter
DN13623_c0_g1	315	116	7	4.8	DN13623_c0_g1_i1	G125543	G1255431		315	116	7	4.83	100	CDS	288	90.11	1	UDP-2-acetamido-3-amino-2,3-dideoxy-glucuronate N-acetyltransferase	KO:K13018	Bacteria	Bacteroidetes	Cytophagia	Cytophagales	Cytophagaceae	Anditalea
DN41394_c0_g1	363	164	5	2.4	DN41394_c0_g1_i1	G131129	G1311291		363	164	5	2.44	100	CDS	339	53.64	-1	penicillin-binding protein 1A	KO:K05366	Bacteria	Bacteroidetes	Cytophagia	Cytophagales	Cytophagaceae	Anditalea
DN17289_c0_g1	261	64.6	5	6.2	DN17289_c0_g1_i1	G115956	G1159561		261	64.57	5	6.2	100	CDS	258	62.79	1	REP element-mobilizing transposase RayT	COG1943	Bacteria	Bacteroidetes	Cytophagia	Cytophagales	Cytophagaceae	Arcicella
DN41452_c0_g1	318	119	5	3.4	DN41452_c0_g1_i1	G126014	G1260141		318	119	5	3.36	100	CDS	315	46.97	-1	HP	HPrule	Bacteria	Bacteroidetes	Cytophagia	Cytophagales	Cytophagaceae	Arcicella
DN48195_c0_g1	224	36.5	4	8.8	DN48195_c0_g1_i1	G106688	G1066881		224	36.47	4	8.78	100	CDS	222	53.52	-1	HP	HPrule	Bacteria	Bacteroidetes	Cytophagia	Cytophagales	Cytophagaceae	Arcicella
DN48718_c0_g1	224	36.5	2	4.4	DN48718_c0_g1_i1	G106693	G1066931		224	36.47	2	4.39	100	CDS	222	71.23	1	polyferredoxin	COG0348	Bacteria	Bacteroidetes	Cytophagia	Cytophagales	Cytophagaceae	Arcicella
DN22436_c0_g1	283	84.4	4	3.8	DN22436_c0_g1_i1	G120431	G1204311		283	84.42	4	3.79	100	CDS	279	61.29	1	isoleucyl-tRNA synthetase	KO:K01870	Bacteria	Bacteroidetes	Cytophagia	Cytophagales	Cytophagaceae	Cytophaga
DN34267_c0_g1	487	288	13	3.6	DN34267_c0_g1_i1	G139275	G1392751		487	288	13	3.61	100	CDS	486	67.7	1	alpha-amylase	KO:K07405	Bacteria	Bacteroidetes	Cytophagia	Cytophagales	Cytophagaceae	Cytophaga
DN39592_c0_g1	287	88.2	7	6.4	DN39592_c0_g1_i1	G121200	G1212001		287	88.24	7	6.35	100	CDS	285	94.74	-1	preprotein translocase subunit SecA	KO:K03070	Bacteria	Bacteroidetes	Cytophagia	Cytophagales	Cytophagaceae	Cytophaga
DN41607_c0_g1	403	204	6	2.4	DN41607_c0_g1_i1	G134451	G1344511		403	204	6	2.36	100	CDS	399	62.2	-1	HP	HPrule	Bacteria	Bacteroidetes	Cytophagia	Cytophagales	Cytophagaceae	Cytophaga
DN49848_c0_g1	257	61.2	3	3.9	DN49848_c0_g1_i1	G115202	G1152021		257	61.18	3	3.93	100	CDS	255	40	1	AhpC/TSA family protein	pfam00578	Bacteria	Bacteroidetes	Cytophagia	Cytophagales	Cytophagaceae	Cytophaga
DN12753_c0_g1	309	110	11	8	DN12753_c0_g1_i1	G124678	G1246781		309	110	11	8.01	100	CDS	306	63.37	-1	hippurate hydrolase	KO:K01451	Bacteria	Bacteroidetes	Cytophagia	Cytophagales	Cytophagaceae	Dyadobacter
DN13212_c0_g1	256	60.4	3	4	DN13212_c0_g1_i1	G114819	G1148191		256	60.35	3	3.98	100	CDS	207	53.97	-1	2-amino-4-hydroxy-6-hydroxymethyldihydropteridine diphosphokinase	KO:K00950	Bacteria	Bacteroidetes	Cytophagia	Cytophagales	Cytophagaceae	Dyadobacter
DN25605_c0_g1	267	69.8	4	4.6	DN25605_c0_g1_i1	G117276	G1172761		267	69.78	4	4.59	100	CDS	264	77.38	1	LmbE family N-acetylglucosaminyl deacetylase	COG2120	Bacteria	Bacteroidetes	Cytophagia	Cytophagales	Cytophagaceae	Dyadobacter
DN29499_c0_g1	250	55.5	3	4.3	DN29499_c0_g1_i1	G113551	G1135511		250	55.45	3	4.33	100	CDS	246	48.15	1	ATP-dependent exoDNAse (exonuclease V) beta subunit	COG1074	Bacteria	Bacteroidetes	Cytophagia	Cytophagales	Cytophagaceae	Dyadobacter
DN41305_c0_g1	442	243	15	4.9	DN41305_c0_g1_i1	G137009	G1370091		442	243	15	4.94	100	CDS	441	39.73	1	HP	HPrule	Bacteria	Bacteroidetes	Cytophagia	Cytophagales	Cytophagaceae	Dyadobacter
DN47584_c0_g1	270	72.4	6	6.6	DN47584_c0_g1_i1	G117989	G1179891		270	72.44	6	6.63	100	CDS	237	71.43	1	transcription-repair coupling factor (superfamily II helicase)	KO:K03723	Bacteria	Bacteroidetes	Cytophagia	Cytophagales	Cytophagaceae	Dyadobacter
DN47618_c0_g1	226	37.8	3	6.4	DN47618_c0_g1_i1	G107205	G1072051		226	37.8	3	6.36	100	CDS	225	70.67	1	peptide chain release factor 2	KO:K02836	Bacteria	Bacteroidetes	Cytophagia	Cytophagales	Cytophagaceae	Dyadobacter
DN48939_c0_g1	216	31.4	3	7.6	DN48939_c0_g1_i1	G104457	G1044571		216	31.43	3	7.64	100	CDS	213	58.57	1	DNA mismatch repair protein MutS2	KO:K07456	Bacteria	Bacteroidetes	Cytophagia	Cytophagales	Cytophagaceae	Dyadobacter
DN43686_c0_g1	524	325	7	1.7	DN43686_c0_g1_i1	G140706	G1407061		524	325	7	1.72	100	CDS	522	55.29	1	ABC-type uncharacterized transport system involved in gliding motility auxiliary subunit	COG3225	Bacteria	Bacteroidetes	Cytophagia	Cytophagales	Cytophagaceae	Ekhidna
DN45182_c0_g1	454	255	12	3.8	DN45182_c0_g1_i1	G137646	G1376461		454	255	12	3.77	100	CDS	453	81.76	1	transcriptional/translational regulatory protein YebC/TACO1	COG0217	Bacteria	Bacteroidetes	Cytophagia	Cytophagales	Cytophagaceae	Ekhidna
DN25945_c0_g1	340	141	9	5.1	DN25945_c0_g1_i1	G128765	G1287651		340	141	9	5.11	100	CDS	339	63.48	1	aminopeptidase N	COG0308	Bacteria	Bacteroidetes	Cytophagia	Cytophagales	Cytophagaceae	Emticicia
DN34858_c0_g1	270	72.4	6	6.6	DN34858_c0_g1_i1	G117936	G1179361		270	72.44	6	6.63	100	CDS	267	42.35	-1	HP	HPrule	Bacteria	Bacteroidetes	Cytophagia	Cytophagales	Cytophagaceae	Emticicia
DN48950_c0_g1	385	186	5	2.2	DN48950_c0_g1_i1	G133107	G1331071		385	186	5	2.15	100	CDS	384	52.76	-1	kynureninase	KO:K01556	Bacteria	Bacteroidetes	Cytophagia	Cytophagales	Cytophagaceae	Emticicia
DN5544_c0_g1	211	28.5	5	14.1	DN5544_c0_g1_i1	G103047	G1030471		211	28.47	5	14.06	100	CDS	210	68.12	-1	UDP-N-acetylmuramate dehydrogenase	KO:K00075	Bacteria	Bacteroidetes	Cytophagia	Cytophagales	Cytophagaceae	Emticicia
DN21192_c0_g1	263	66.3	4	4.8	DN21192_c0_g1_i1	G116399	G1163991		263	66.28	4	4.83	100	CDS	261	50.57	1	predicted naringenin-chalcone synthase	COG3424	Bacteria	Bacteroidetes	Cytophagia	Cytophagales	Cytophagaceae	Fibrella
DN13679_c0_g1	298	99	8	6.5	DN13679_c0_g1_i1	G123010	G1230101		298	99	8	6.47	100	CDS	297	56.32	-1	cob(I)alamin adenosyltransferase	KO:K00798	Bacteria	Bacteroidetes	Cytophagia	Cytophagales	Cytophagaceae	Fibrisoma
DN37086_c0_g1	1220	1021	59	4.6	DN37086_c0_g1_i1	G148887	G1488871	1	1220	1021	59	4.63	100	CDS	84	#N/A	1	HP	HPrule	Bacteria	Bacteroidetes	Cytophagia	Cytophagales	Cytophagaceae	Fibrisoma
DN37086_c0_g1	1220	1021	59	4.6	DN37086_c0_g1_i1	G148887	G1488872	2	1220	1021	59	4.63	100	CDS	1158	50.93	1	uncharacterized protein (DUF1800 family)	COG5267	Bacteria	Bacteroidetes	Cytophagia	Cytophagales	Cytophagaceae	Fibrisoma
DN41274_c0_g1	284	85.4	6	5.6	DN41274_c0_g1_i1	G120679	G1206791		284	85.37	6	5.63	100	CDS	282	48.35	1	DNA repair protein RecN (Recombination protein N)	KO:K03631	Bacteria	Bacteroidetes	Cytophagia	Cytophagales	Cytophagaceae	Fibrisoma
DN960_c0_g1	798	599	21	2.8	DN960_c0_g1_i1	G146173	G1461731		798	599	21	2.81	100	CDS	795	52.22	1	uncharacterized protein (DUF1501 family)	COG4102	Bacteria	Bacteroidetes	Cytophagia	Cytophagales	Cytophagaceae	Fibrisoma
DN13519_c0_g1	701	502	22	3.5	DN13519_c0_g1_i1	G144884	G1448841	1	701	502	22	3.51	100	CDS	84	#N/A	1	HP	HPrule	Bacteria	Bacteroidetes	Cytophagia	Cytophagales	Cytophagaceae	Flectobacillus
DN13519_c0_g1	701	502	22	3.5	DN13519_c0_g1_i1	G144884	G1448842	2	701	502	22	3.51	100	CDS	606	36.55	1	Fe-S cluster assembly protein SufD	KO:K09015	Bacteria	Bacteroidetes	Cytophagia	Cytophagales	Cytophagaceae	Flectobacillus
DN37135_c0_g1	276	77.9	6	6.2	DN37135_c0_g1_i1	G119105	G1191051		276	77.89	6	6.17	100	CDS	273	61.54	1	phosphomannomutase	KO:K01840	Bacteria	Bacteroidetes	Cytophagia	Cytophagales	Cytophagaceae	Flectobacillus
DN49826_c0_g1	218	32.7	3	7.4	DN49826_c0_g1_i1	G105015	G1050151		218	32.65	3	7.36	100	CDS	171	48.08	-1	glyceraldehyde 3-phosphate dehydrogenase	KO:K00134	Bacteria	Bacteroidetes	Cytophagia	Cytophagales	Cytophagaceae	Flectobacillus
DN11826_c0_g1	402	203	9	3.6	DN11826_c0_g1_i1	G134335	G1343351	1	402	203	9	3.55	100	CDS	111	#N/A	1	HP	HPrule	Bacteria	Bacteroidetes	Cytophagia	Cytophagales	Cytophagaceae	Flexibacter
DN11826_c0_g1	402	203	9	3.6	DN11826_c0_g1_i1	G134335	G1343352	2	402	203	9	3.55	100	CDS	285	52.58	1	GDP-L-fucose synthase	KO:K02377	Bacteria	Bacteroidetes	Cytophagia	Cytophagales	Cytophagaceae	Flexibacter
DN14093_c0_g1	346	147	43	23.4	DN14093_c0_g1_i1	G129400	G1294001		346	147	43	23.42	100	CDS	243	62.34	-1	large subunit ribosomal protein L28	KO:K02902	Bacteria	Bacteroidetes	Cytophagia	Cytophagales	Cytophagaceae	Flexibacter
DN16264_c0_g1	244	50.7	4	6.3	DN16264_c0_g1_i1	G111877	G1118771		244	50.74	4	6.31	100	CDS	243	52.31	1	HP	HPrule	Bacteria	Bacteroidetes	Cytophagia	Cytophagales	Cytophagaceae	Flexibacter
DN16589_c0_g1	232	41.9	3	5.7	DN16589_c0_g1_i1	G108680	G1086801		232	41.9	3	5.73	100	CDS	231	56.72	-1	HP	HPrule	Bacteria	Bacteroidetes	Cytophagia	Cytophagales	Cytophagaceae	Flexibacter
DN29364_c0_g1	236	44.8	6	10.7	DN29364_c0_g1_i1	G109800	G1098001		236	44.76	6	10.73	100	CDS	234	48.05	-1	HP	HPrule	Bacteria	Bacteroidetes	Cytophagia	Cytophagales	Cytophagaceae	Flexibacter
DN33844_c0_g1	549	350	8	1.8	DN33844_c0_g1_i1	G141489	G1414891		549	350	8	1.83	100	CDS	549	40.43	1	HP	HPrule	Bacteria	Bacteroidetes	Cytophagia	Cytophagales	Cytophagaceae	Flexibacter
DN47570_c0_g1	282	83.5	7	6.7	DN47570_c0_g1_i1	G120333	G1203331		282	83.48	7	6.71	100	CDS	279	60.87	1	HP	HPrule	Bacteria	Bacteroidetes	Cytophagia	Cytophagales	Cytophagaceae	Flexibacter
DN48408_c0_g1	206	25.7	5	15.6	DN48408_c0_g1_i1	G101604	G1016041		206	25.67	5	15.59	100	CDS	204	72.06	1	GDP-L-fucose synthase	KO:K02377	Bacteria	Bacteroidetes	Cytophagia	Cytophagales	Cytophagaceae	Flexibacter
DN19444_c0_g1	257	61.2	4	5.2	DN19444_c0_g1_i1	G115070	G1150701		257	61.18	4	5.24	100	CDS	255	53.57	1	HP	HPrule	Bacteria	Bacteroidetes	Cytophagia	Cytophagales	Cytophagaceae	Larkinella
DN25616_c0_g1	637	438	36	6.6	DN25616_c0_g1_i1	G143730	G1437301		637	438	36	6.58	100	CDS	543	80.45	1	peroxiredoxin (alkyl hydroperoxide reductase subunit C)	KO:K03386	Bacteria	Bacteroidetes	Cytophagia	Cytophagales	Cytophagaceae	Larkinella
DN27138_c0_g1	296	97	16	13.2	DN27138_c0_g1_i1	G122731	G1227311		296	97.02	16	13.21	100	CDS	156	62.16	-1	CheY-like chemotaxis protein	COG0784	Bacteria	Bacteroidetes	Cytophagia	Cytophagales	Cytophagaceae	Larkinella
DN17336_c0_g1	302	103	5	3.9	DN17336_c0_g1_i1	G123681	G1236811		302	103	5	3.89	100	CDS	300	54	1	HP	HPrule	Bacteria	Bacteroidetes	Cytophagia	Cytophagales	Cytophagaceae	Marinoscillum
DN26829_c0_g1	246	52.3	4	6.1	DN26829_c0_g1_i1	G112480	G1124801		246	52.29	4	6.13	100	CDS	243	56.25	-1	alanyl-tRNA synthetase	KO:K01872	Bacteria	Bacteroidetes	Cytophagia	Cytophagales	Cytophagaceae	Marinoscillum
DN27362_c0_g1	373	174	6	2.8	DN27362_c0_g1_i1	G132022	G1320221		373	174	6	2.76	100	CDS	372	78.23	1	AMP nucleosidase	KO:K01241	Bacteria	Bacteroidetes	Cytophagia	Cytophagales	Cytophagaceae	Marinoscillum
DN27372_c0_g1	286	87.3	5	4.6	DN27372_c0_g1_i1	G120976	G1209761		286	87.28	5	4.59	100	CDS	285	41.79	1	ligand-binding sensor domain-containing protein	COG3292	Bacteria	Bacteroidetes	Cytophagia	Cytophagales	Cytophagaceae	Marinoscillum
DN28666_c0_g1	398	199	8	3.2	DN28666_c0_g1_i1	G134072	G1340721		398	199	8	3.22	100	CDS	396	29.06	1	predicted Zn-dependent protease	COG4783	Bacteria	Bacteroidetes	Cytophagia	Cytophagales	Cytophagaceae	Marinoscillum
DN30407_c0_g1	418	219	20	7.3	DN30407_c0_g1_i1	G135475	G1354751		418	219	20	7.31	100	CDS	369	89.34	1	dihydrolipoamide dehydrogenase	KO:K00382	Bacteria	Bacteroidetes	Cytophagia	Cytophagales	Cytophagaceae	Marinoscillum
DN37369_c0_g1	357	158	9	4.6	DN37369_c0_g1_i1	G130535	G1305351		357	158	9	4.56	100	CDS	357	68.64	-1	small conductance mechanosensitive channel	KO:K03442	Bacteria	Bacteroidetes	Cytophagia	Cytophagales	Cytophagaceae	Marinoscillum
DN17977_c0_g1	464	265	14	4.2	DN17977_c0_g1_i1	G138173	G1381731		464	265	14	4.23	100	CDS	363	53.21	-1	uncharacterized protein DUF3127	pfam11325	Bacteria	Bacteroidetes	Cytophagia	Cytophagales	Cytophagaceae	Ohtaekwangia
DN33188_c0_g1	394	195	10	4.1	DN33188_c0_g1_i1	G133779	G1337791		394	195	10	4.11	100	CDS	360	69.67	-1	HP	HPrule	Bacteria	Bacteroidetes	Cytophagia	Cytophagales	Cytophagaceae	Ohtaekwangia
DN28824_c0_g1	232	41.9	6	11.5	DN28824_c0_g1_i1	G108739	G1087391		232	41.9	6	11.47	100	CDS	228	61.84	-1	cytochrome d ubiquinol oxidase subunit II	KO:K00426	Bacteria	Bacteroidetes	Cytophagia	Cytophagales	Cytophagaceae	Rhodonellum
DN39490_c0_g1	432	233	10	3.4	DN39490_c0_g1_i1	G136415	G1364151		432	233	10	3.44	100	CDS	369	54.47	1	sodium-dependent dicarboxylate transporter 2/3/5	KO:K14445	Bacteria	Bacteroidetes	Cytophagia	Cytophagales	Cytophagaceae	Rhodonellum
DN27775_c0_g1	279	80.7	3	3	DN27775_c0_g1_i1	G119650	G1196501		279	80.67	3	2.98	100	CDS	276	41.11	-1	lipopolysaccharide export system permease protein	KO:K11720	Bacteria	Bacteroidetes	Cytophagia	Cytophagales	Cytophagaceae	Rudanella
DN30433_c0_g1	350	151	8	4.2	DN30433_c0_g1_i1	G129819	G1298191		350	151	8	4.24	100	CDS	258	76.47	1	NAD-dependent deacetylase	KO:K12410	Bacteria	Bacteroidetes	Cytophagia	Cytophagales	Cytophagaceae	Runella
DN34088_c0_g1	292	93.1	9	7.7	DN34088_c0_g1_i1	G122060	G1220601		292	93.08	9	7.74	100	CDS	291	67.01	1	thymidine kinase	KO:K00857	Bacteria	Bacteroidetes	Cytophagia	Cytophagales	Cytophagaceae	Runella
DN40069_c0_g1	279	80.7	10	9.9	DN40069_c0_g1_i1	G119707	G1197071		279	80.67	10	9.93	100	CDS	255	55.29	-1	HP	HPrule	Bacteria	Bacteroidetes	Cytophagia	Cytophagales	Cytophagaceae	Runella
DN12990_c0_g1	1219	1020	45	3.5	DN12990_c0_g1_i1	G148883	G1488831		1219	1020	45	3.53	100	CDS	1200	49.62	-1	long-chain fatty acid transport protein	KO:K06076	Bacteria	Bacteroidetes	Cytophagia	Cytophagales	Cytophagaceae	Saccharicrinis
DN15002_c0_g1	202	23.6	4	13.6	DN15002_c0_g1_i1	G100348	G1003481		202	23.55	4	13.6	100	CDS	201	72.73	1	HlyD family secretion protein	KO:K02005	Bacteria	Bacteroidetes	Cytophagia	Cytophagales	Cytophagaceae	Saccharicrinis
DN17574_c0_g1	224	36.5	3	6.6	DN17574_c0_g1_i1	G106522	G1065221	1	224	36.47	3	6.59	100	CDS	141	52.27	1	lipopolysaccharide export system permease protein	KO:K07091	Bacteria	Bacteroidetes	Cytophagia	Cytophagales	Cytophagaceae	Saccharicrinis
DN17574_c0_g1	224	36.5	3	6.6	DN17574_c0_g1_i1	G106522	G1065222	2	224	36.47	3	6.59	100	CDS	84	#N/A	1	HP	HPrule	Bacteria	Bacteroidetes	Cytophagia	Cytophagales	Cytophagaceae	Saccharicrinis
DN20545_c0_g1	212	29.1	3	8.3	DN20545_c0_g1_i1	G103148	G1031481		212	29.05	3	8.27	100	CDS	210	48.53	-1	HP	HPrule	Bacteria	Bacteroidetes	Cytophagia	Cytophagales	Cytophagaceae	Saccharicrinis
DN29481_c0_g1	397	198	12	4.9	DN29481_c0_g1_i1	G134004	G1340041		397	198	12	4.85	100	CDS	393	66.67	-1	ABC-2 type transport system permease protein	KO:K01992	Bacteria	Bacteroidetes	Cytophagia	Cytophagales	Cytophagaceae	Saccharicrinis
DN31660_c0_g1	704	505	12	1.9	DN31660_c0_g1_i1	G144930	G1449301		704	505	12	1.9	100	CDS	702	68.24	-1	dipeptidase	COG4690	Bacteria	Bacteroidetes	Cytophagia	Cytophagales	Cytophagaceae	Saccharicrinis
DN32053_c0_g1	207	26.2	4	12.2	DN32053_c0_g1_i1	G101812	G1018121		207	26.22	4	12.22	100	CDS	204	46.88	1	HP	HPrule	Bacteria	Bacteroidetes	Cytophagia	Cytophagales	Cytophagaceae	Saccharicrinis
DN32929_c0_g1	244	50.7	4	6.3	DN32929_c0_g1_i1	G111967	G1119671		244	50.74	4	6.31	100	CDS	240	62.5	-1	GAF domain-containing protein	KO:K07170	Bacteria	Bacteroidetes	Cytophagia	Cytophagales	Cytophagaceae	Saccharicrinis
DN37101_c0_g1	986	787	37	3.8	DN37101_c0_g1_i1	G147741	G1477411	1	986	787	37	3.76	100	CDS	129	#N/A	1	HP	HPrule	Bacteria	Bacteroidetes	Cytophagia	Cytophagales	Cytophagaceae	Saccharicrinis
DN37101_c0_g1	986	787	37	3.8	DN37101_c0_g1_i1	G147741	G1477412	2	986	787	37	3.76	100	CDS	852	71.38	1	cytochrome c oxidase subunit 1	KO:K02274	Bacteria	Bacteroidetes	Cytophagia	Cytophagales	Cytophagaceae	Saccharicrinis
DN38625_c0_g1	368	169	11	5.2	DN38625_c0_g1_i1	G131586	G1315861		368	169	11	5.21	100	CDS	345	55.14	-1	HP	HPrule	Bacteria	Bacteroidetes	Cytophagia	Cytophagales	Cytophagaceae	Saccharicrinis
DN45580_c0_g1	348	149	6	3.2	DN45580_c0_g1_i1	G129650	G1296501		348	149	6	3.22	100	CDS	294	58.33	1	CBS domain containing-hemolysin-like protein	COG1253	Bacteria	Bacteroidetes	Cytophagia	Cytophagales	Cytophagaceae	Saccharicrinis
DN45641_c0_g1	886	687	48	5.6	DN45641_c0_g1_i1	G147024	G1470241		886	687	48	5.59	100	CDS	846	57.6	-1	HP	HPrule	Bacteria	Bacteroidetes	Cytophagia	Cytophagales	Cytophagaceae	Saccharicrinis
DN7220_c0_g1	816	617	20	2.6	DN7220_c0_g1_i1	G146356	G1463561		816	617	20	2.6	100	CDS	759	73.12	-1	S-adenosylmethionine:tRNA ribosyltransferase-isomerase	KO:K07568	Bacteria	Bacteroidetes	Cytophagia	Cytophagales	Cytophagaceae	Saccharicrinis
DN27444_c0_g1	248	53.9	4	6	DN27444_c0_g1_i1	G112992	G1129921		248	53.86	4	5.95	100	CDS	246	52.44	1	DNA repair protein RecN (Recombination protein N)	KO:K03631	Bacteria	Bacteroidetes	Cytophagia	Cytophagales	Cytophagaceae	Siphonobacter
DN36709_c0_g1	343	144	5	2.8	DN36709_c0_g1_i1	G129136	G1291361		343	144	5	2.78	100	CDS	339	52.24	-1	outer membrane protein OmpA-like peptidoglycan-associated protein	COG2885	Bacteria	Bacteroidetes	Cytophagia	Cytophagales	Cytophagaceae	Siphonobacter
DN41610_c0_g1	272	74.2	3	3.2	DN41610_c0_g1_i1	G118345	G1183451		272	74.24	3	3.24	100	CDS	270	44.44	1	HP	HPrule	Bacteria	Bacteroidetes	Cytophagia	Cytophagales	Cytophagaceae	Siphonobacter
DN22089_c0_g1	300	101	4	3.2	DN22089_c0_g1_i1	G123363	G1233631		300	101	4	3.17	100	CDS	297	51.52	-1	alkaline phosphatase D	KO:K01113	Bacteria	Bacteroidetes	Cytophagia	Cytophagales	Cytophagaceae	Spirosoma
DN22261_c0_g1	271	73.3	5	5.5	DN22261_c0_g1_i1	G118069	G1180691		271	73.34	5	5.46	100	CDS	270	38.55	1	YXYXY domain-containing protein	pfam07495	Bacteria	Bacteroidetes	Cytophagia	Cytophagales	Cytophagaceae	Spirosoma
DN22946_c0_g1	275	77	2	2.1	DN22946_c0_g1_i1	G118858	G1188581		275	76.97	2	2.08	100	CDS	273	65.93	1	pantoate--beta-alanine ligase	KO:K01918	Bacteria	Bacteroidetes	Cytophagia	Cytophagales	Cytophagaceae	Spirosoma
DN25670_c0_g1	325	126	5	3.2	DN25670_c0_g1_i1	G126878	G1268781		325	126	5	3.18	100	CDS	324	40	1	uncharacterized protein DUF1207	pfam06727	Bacteria	Bacteroidetes	Cytophagia	Cytophagales	Cytophagaceae	Spirosoma
DN26888_c0_g1	345	146	4	2.2	DN26888_c0_g1_i1	G129336	G1293361		345	146	4	2.19	100	CDS	342	50.79	1	HP	HPrule	Bacteria	Bacteroidetes	Cytophagia	Cytophagales	Cytophagaceae	Spirosoma
DN28015_c0_g1	217	32	3	7.5	DN28015_c0_g1_i1	G104599	G1045991		217	32.04	3	7.5	100	CDS	216	62.12	1	HP	HPrule	Bacteria	Bacteroidetes	Cytophagia	Cytophagales	Cytophagaceae	Spirosoma
DN29132_c0_g1	259	62.9	4	5.1	DN29132_c0_g1_i1	G115566	G1155661		259	62.86	4	5.1	100	CDS	258	60	-1	purine-nucleoside phosphorylase	KO:K03783	Bacteria	Bacteroidetes	Cytophagia	Cytophagales	Cytophagaceae	Spirosoma
DN30964_c0_g1	285	86.3	4	3.7	DN30964_c0_g1_i1	G120820	G1208201		285	86.32	4	3.71	100	CDS	285	37.23	1	polymorphic membrane protein/polymorphic membrane protein	pfam02415,pfam02415	Bacteria	Bacteroidetes	Cytophagia	Cytophagales	Cytophagaceae	Spirosoma
DN33055_c0_g1	212	29.1	4	11	DN33055_c0_g1_i1	G103223	G1032231		212	29.05	4	11.03	100	CDS	171	59.65	1	PIN domain nuclease of toxin-antitoxin system	COG3744	Bacteria	Bacteroidetes	Cytophagia	Cytophagales	Cytophagaceae	Spirosoma
DN34854_c0_g1	290	91.1	5	4.4	DN34854_c0_g1_i1	G121705	G1217051		290	91.14	5	4.39	100	CDS	276	55.17	1	heavy-metal-associated domain-containing protein	pfam00403	Bacteria	Bacteroidetes	Cytophagia	Cytophagales	Cytophagaceae	Spirosoma
DN35954_c0_g1	268	70.7	4	4.5	DN35954_c0_g1_i1	G117525	G1175251		268	70.66	4	4.53	100	CDS	267	63.22	1	mannose-6-phosphate isomerase	KO:K01809	Bacteria	Bacteroidetes	Cytophagia	Cytophagales	Cytophagaceae	Spirosoma
DN37220_c0_g1	668	469	14	2.4	DN37220_c0_g1_i1	G144324	G1443241		668	469	14	2.39	100	CDS	666	77.38	1	queuine tRNA-ribosyltransferase	KO:K00773	Bacteria	Bacteroidetes	Cytophagia	Cytophagales	Cytophagaceae	Spirosoma
DN39292_c0_g1	228	39.1	4	8.2	DN39292_c0_g1_i1	G107742	G1077421		228	39.14	4	8.18	100	CDS	228	44.29	1	HP	HPrule	Bacteria	Bacteroidetes	Cytophagia	Cytophagales	Cytophagaceae	Spirosoma
DN4917_c0_g1	1267	1068	105	7.9	DN4917_c0_g1_i1	G149064	G1490641		1267	1068	105	7.87	100	CDS	1113	31.02	-1	HP	HPrule	Bacteria	Bacteroidetes	Cytophagia	Cytophagales	Cytophagaceae	Spirosoma
DN17224_c0_g1	1388	1189	52	3.5	DN17224_c0_g1_i1	G149435	G1494351		1388	1189	52	3.5	100	CDS	1356	47.93	-1	HP	HPrule	Bacteria	Bacteroidetes	Cytophagia	Cytophagales	Cytophagaceae	Sporocytophaga
DN17612_c0_g1	738	539	20	3	DN17612_c0_g1_i1	G145439	G1454391	1	738	539	20	2.97	100	CDS	327	48.54	1	small-conductance mechanosensitive channel	COG0668	Bacteria	Bacteroidetes	Cytophagia	Cytophagales	Cytophagaceae	Sporocytophaga
DN17612_c0_g1	738	539	20	3	DN17612_c0_g1_i1	G145439	G1454392	2	738	539	20	2.97	100	CDS	255	#N/A	-1	HP	HPrule	Bacteria	Bacteroidetes	Cytophagia	Cytophagales	Cytophagaceae	Sporocytophaga
DN19175_c0_g1	538	339	8	1.9	DN19175_c0_g1_i1	G141139	G1411391		538	339	8	1.89	100	CDS	537	38.06	-1	HP	HPrule	Bacteria	Bacteroidetes	Cytophagia	Cytophagales	Cytophagaceae	Sporocytophaga
DN19643_c0_g1	445	246	7	2.3	DN19643_c0_g1_i1	G137143	G1371431	1	445	246	7	2.28	100	CDS	381	36.14	-1	HP	HPrule	Bacteria	Bacteroidetes	Cytophagia	Cytophagales	Cytophagaceae	Sporocytophaga
DN19643_c0_g1	445	246	7	2.3	DN19643_c0_g1_i1	G137143	G1371432	2	445	246	7	2.28	100	CDS	90	#N/A	-1	HP	HPrule	Bacteria	Bacteroidetes	Cytophagia	Cytophagales	Cytophagaceae	Sporocytophaga
DN32720_c0_g1	485	286	8	2.2	DN32720_c0_g1_i1	G139177	G1391771		485	286	8	2.24	100	CDS	483	62.73	1	GH3 auxin-responsive promoter	pfam03321	Bacteria	Bacteroidetes	Cytophagia	Cytophagales	Cytophagaceae	Sporocytophaga
DN4106_c0_g1	552	353	8	1.8	DN4106_c0_g1_i1	G141581	G1415811		552	353	8	1.81	100	CDS	552	38.46	1	HP	HPrule	Bacteria	Bacteroidetes	Cytophagia	Cytophagales	Cytophagaceae	Sporocytophaga
DN44163_c0_g1	540	341	17	4	DN44163_c0_g1_i1	G141218	G1412181		540	341	17	3.99	100	CDS	456	42.36	-1	single-strand DNA-binding protein	KO:K03111	Bacteria	Bacteroidetes	Cytophagia	Cytophagales	Cytophagaceae	Sporocytophaga
DN48639_c0_g1	269	71.6	3	3.4	DN48639_c0_g1_i1	G117792	G1177921		269	71.55	3	3.36	100	CDS	249	43.37	-1	HP	HPrule	Bacteria	Bacteroidetes	Cytophagia	Cytophagales	Cytophagaceae	Sporocytophaga
DN12437_c0_g1	1749	1550	65	3.4	DN12437_c0_g1_i1	G150144	G1501441	1	1749	1550	65	3.36	100	CDS	375	48.39	1	HP	KO:K06929	Bacteria	Bacteroidetes	Cytophagia	Cytophagales	Cytophagaceae
DN12437_c0_g1	1749	1550	65	3.4	DN12437_c0_g1_i1	G150144	G1501442	2	1749	1550	65	3.36	100	CDS	1200	33.17	1	PKD repeat protein	COG3291	Bacteria	Bacteroidetes	Cytophagia	Cytophagales	Cytophagaceae
DN12437_c0_g1	1749	1550	65	3.4	DN12437_c0_g1_i1	G150144	G1501443	3	1749	1550	65	3.36	100	CDS	117	#N/A	-1	HP	HPrule	Bacteria	Bacteroidetes	Cytophagia	Cytophagales	Cytophagaceae
DN45220_c0_g1	495	296	6	1.6	DN45220_c0_g1_i1	G139584	G1395841	1	495	296	6	1.62	100	CDS	126	66.67	1	alpha-2-macroglobulin family protein	pfam00207	Bacteria	Bacteroidetes	Cytophagia	Cytophagales	Cytophagaceae
DN45220_c0_g1	495	296	6	1.6	DN45220_c0_g1_i1	G139584	G1395842	2	495	296	6	1.62	100	CDS	369	38.52	1	uncharacterized protein YfaS (alpha-2-macroglobulin family)	COG2373	Bacteria	Bacteroidetes	Cytophagia	Cytophagales	Cytophagaceae
DN20064_c0_g1	472	273	8	2.4	DN20064_c0_g1_i1	G138575	G1385751	1	472	273	8	2.35	100	CDS	102	#N/A	1	HP	HPrule	Bacteria	Bacteroidetes	Cytophagia	Cytophagales	Flammeovirgaceae	Cesiribacter
DN20064_c0_g1	472	273	8	2.4	DN20064_c0_g1_i1	G138575	G1385752	2	472	273	8	2.35	100	CDS	360	60.71	-1	leucyl aminopeptidase	KO:K01255	Bacteria	Bacteroidetes	Cytophagia	Cytophagales	Flammeovirgaceae	Cesiribacter
DN26308_c0_g1	434	235	5	1.7	DN26308_c0_g1_i1	G136522	G1365221		434	235	5	1.7	100	CDS	432	61.54	1	multidrug efflux pump	KO:K18138	Bacteria	Bacteroidetes	Cytophagia	Cytophagales	Flammeovirgaceae	Cesiribacter
DN42589_c0_g1	331	132	7	4.3	DN42589_c0_g1_i1	G127745	G1277451		331	132	7	4.25	100	CDS	330	56.88	-1	prolyl oligopeptidase	KO:K01322	Bacteria	Bacteroidetes	Cytophagia	Cytophagales	Flammeovirgaceae	Cesiribacter
DN27739_c0_g1	258	62	3	3.9	DN27739_c0_g1_i1	G115318	G1153181		258	62.02	3	3.87	100	CDS	189	87.3	-1	UDP-N-acetylglucosamine acyltransferase	KO:K00677	Bacteria	Bacteroidetes	Cytophagia	Cytophagales	Flammeovirgaceae	Fabibacter
DN31713_c0_g1	707	508	21	3.3	DN31713_c0_g1_i1	G144975	G1449751		707	508	21	3.31	100	CDS	705	70.21	1	cytochrome d ubiquinol oxidase subunit I	KO:K00425	Bacteria	Bacteroidetes	Cytophagia	Cytophagales	Flammeovirgaceae	Fabibacter
DN45419_c0_g1	461	262	13	4	DN45419_c0_g1_i1	G138036	G1380361		461	262	13	3.97	100	CDS	459	75.82	-1	4-hydroxyphenylpyruvate dioxygenase	KO:K00457	Bacteria	Bacteroidetes	Cytophagia	Cytophagales	Flammeovirgaceae	Fabibacter
DN48379_c0_g1	208	26.8	3	9	DN48379_c0_g1_i1	G102193	G1021931		208	26.77	3	8.97	100	CDS	207	62.3	1	cell division protein FtsI (penicillin-binding protein 3)	KO:K03587	Bacteria	Bacteroidetes	Cytophagia	Cytophagales	Flammeovirgaceae	Fabibacter
DN1442_c0_g1	906	707	55	6.2	DN1442_c0_g1_i1	G147186	G1471861		906	707	55	6.23	100	CDS	903	35	-1	HP	HPrule	Bacteria	Bacteroidetes	Cytophagia	Cytophagales	Flammeovirgaceae	Flammeovirga
DN22026_c0_g1	426	227	6	2.1	DN22026_c0_g1_i1	G135994	G1359941		426	227	6	2.12	100	CDS	423	46.1	1	HP	HPrule	Bacteria	Bacteroidetes	Cytophagia	Cytophagales	Flammeovirgaceae	Flammeovirga
DN24195_c0_g1	460	261	10	3.1	DN24195_c0_g1_i1	G137959	G1379591		460	261	10	3.07	100	CDS	459	36.6	-1	internalin A	KO:K13730	Bacteria	Bacteroidetes	Cytophagia	Cytophagales	Flammeovirgaceae	Flammeovirga
DN24205_c0_g1	1927	1728	259	12	DN24205_c0_g1_i1	G150330	G1503301		1927	1728	259	12	100	CDS	1857	35.16	-1	HP	HPrule	Bacteria	Bacteroidetes	Cytophagia	Cytophagales	Flammeovirgaceae	Flammeovirga
DN32690_c0_g1	251	56.3	5	7.1	DN32690_c0_g1_i1	G113794	G1137941		251	56.26	5	7.12	100	CDS	249	34.52	1	HP	HPrule	Bacteria	Bacteroidetes	Cytophagia	Cytophagales	Flammeovirgaceae	Flammeovirga
DN35759_c0_g1	206	25.7	3	9.4	DN35759_c0_g1_i1	G101544	G1015441		206	25.67	3	9.36	100	CDS	204	49.23	-1	ABC-2 type transport system permease protein	KO:K01992	Bacteria	Bacteroidetes	Cytophagia	Cytophagales	Flammeovirgaceae	Flammeovirga
DN35903_c0_g1	290	91.1	4	3.5	DN35903_c0_g1_i1	G121710	G1217101		290	91.14	4	3.51	100	CDS	288	75	1	glutaminyl-tRNA synthetase	KO:K01886	Bacteria	Bacteroidetes	Cytophagia	Cytophagales	Flammeovirgaceae	Flammeovirga
DN45973_c0_g1	421	222	10	3.6	DN45973_c0_g1_i1	G135693	G1356931		421	222	10	3.61	100	CDS	129	81.4	-1	HP	HPrule	Bacteria	Bacteroidetes	Cytophagia	Cytophagales	Flammeovirgaceae	Flammeovirga
DN5410_c0_g1	222	35.2	2	4.6	DN5410_c0_g1_i1	G106147	G1061471		222	35.18	2	4.55	100	CDS	222	47.92	-1	HP	HPrule	Bacteria	Bacteroidetes	Cytophagia	Cytophagales	Flammeovirgaceae	Flammeovirga
DN12444_c0_g1	1329	1130	29	2.1	DN12444_c0_g1_i1	G149253	G1492531		1329	1130	29	2.06	100	CDS	1209	80.89	-1	arginine decarboxylase	KO:K01585	Bacteria	Bacteroidetes	Cytophagia	Cytophagales	Flammeovirgaceae	Flexithrix
DN21177_c0_g1	227	38.5	4	8.3	DN21177_c0_g1_i1	G107342	G1073421		227	38.47	4	8.33	100	CDS	177	50.85	-1	3-hydroxybutyryl-CoA dehydratase	KO:K17865	Bacteria	Bacteroidetes	Cytophagia	Cytophagales	Flammeovirgaceae	Flexithrix
DN21749_c0_g1	302	103	5	3.9	DN21749_c0_g1_i1	G123702	G1237021		302	103	5	3.89	100	CDS	300	73	1	GTP-binding protein	KO:K06207	Bacteria	Bacteroidetes	Cytophagia	Cytophagales	Flammeovirgaceae	Flexithrix
DN31511_c0_g1	342	143	5	2.8	DN31511_c0_g1_i1	G129006	G1290061		342	143	5	2.8	100	CDS	339	46.9	1	HP	HPrule	Bacteria	Bacteroidetes	Cytophagia	Cytophagales	Flammeovirgaceae	Flexithrix
DN32546_c0_g1	305	106	4	3	DN32546_c0_g1_i1	G124202	G1242021		305	106	4	3.02	100	CDS	303	80.2	1	methylmalonyl-CoA/ethylmalonyl-CoA epimerase	KO:K05606	Bacteria	Bacteroidetes	Cytophagia	Cytophagales	Flammeovirgaceae	Flexithrix
DN34741_c0_g1	606	407	12	2.4	DN34741_c0_g1_i1	G143047	G1430471		606	407	12	2.36	100	CDS	606	64.47	1	DNA-binding response OmpR family regulator	COG0745	Bacteria	Bacteroidetes	Cytophagia	Cytophagales	Flammeovirgaceae	Flexithrix
DN41878_c0_g1	270	72.4	3	3.3	DN41878_c0_g1_i1	G117968	G1179681		270	72.44	3	3.32	100	CDS	267	74.39	1	MATE family multidrug resistance protein	KO:K03327	Bacteria	Bacteroidetes	Cytophagia	Cytophagales	Flammeovirgaceae	Flexithrix
DN45448_c0_g1	237	45.5	3	5.3	DN45448_c0_g1_i1	G110150	G1101501		237	45.49	3	5.28	100	CDS	237	68.83	1	bifunctional ADP-heptose synthase (sugar kinase/adenylyltransferase)	COG2870	Bacteria	Bacteroidetes	Cytophagia	Cytophagales	Flammeovirgaceae	Flexithrix
DN639_c0_g1	254	58.7	5	6.8	DN639_c0_g1_i1	G114543	G1145431		254	58.7	5	6.82	100	CDS	189	51.67	-1	lipopolysaccharide/colanic/teichoic acid biosynthesis glycosyltransferase	COG2148	Bacteria	Bacteroidetes	Cytophagia	Cytophagales	Flammeovirgaceae	Flexithrix
DN14873_c0_g1	252	57.1	3	4.2	DN14873_c0_g1_i1	G113945	G1139451		252	57.06	3	4.21	100	CDS	249	66.27	1	phenylalanyl-tRNA synthetase beta chain	KO:K01890	Bacteria	Bacteroidetes	Cytophagia	Cytophagales	Flammeovirgaceae	Fulvivirga
DN15692_c0_g1	481	282	7	2	DN15692_c0_g1_i1	G138967	G1389671		481	282	7	1.99	100	CDS	477	56	1	beta-aspartyl-peptidase (threonine type)	KO:K13051	Bacteria	Bacteroidetes	Cytophagia	Cytophagales	Flammeovirgaceae	Fulvivirga
DN25601_c0_g1	336	137	13	7.6	DN25601_c0_g1_i1	G128305	G1283051		336	137	13	7.6	100	CDS	324	68.52	-1	transcriptional regulator with XRE-family HTH domain	COG1396	Bacteria	Bacteroidetes	Cytophagia	Cytophagales	Flammeovirgaceae	Fulvivirga
DN26520_c0_g1	425	226	7	2.5	DN26520_c0_g1_i1	G135944	G1359441		425	226	7	2.48	100	CDS	423	65.96	1	carboxyl-terminal processing protease	KO:K03797	Bacteria	Bacteroidetes	Cytophagia	Cytophagales	Flammeovirgaceae	Fulvivirga
DN27153_c0_g1	570	371	16	3.5	DN27153_c0_g1_i1	G142106	G1421061		570	371	16	3.45	100	CDS	570	80.53	1	aconitate hydratase	KO:K01681	Bacteria	Bacteroidetes	Cytophagia	Cytophagales	Flammeovirgaceae	Fulvivirga
DN30517_c0_g1	227	38.5	3	6.3	DN30517_c0_g1_i1	G107393	G1073931		227	38.47	3	6.25	100	CDS	225	67.57	-1	LacI family transcriptional regulator	KO:K02529	Bacteria	Bacteroidetes	Cytophagia	Cytophagales	Flammeovirgaceae	Fulvivirga
DN34794_c0_g1	269	71.6	4	4.5	DN34794_c0_g1_i1	G117725	G1177251		269	71.55	4	4.48	100	CDS	267	51.28	1	PKD repeat protein	COG3291	Bacteria	Bacteroidetes	Cytophagia	Cytophagales	Flammeovirgaceae	Fulvivirga
DN39447_c0_g1	253	57.9	8	11.1	DN39447_c0_g1_i1	G114269	G1142691		253	57.88	8	11.07	100	CDS	252	44.71	-1	HP	HPrule	Bacteria	Bacteroidetes	Cytophagia	Cytophagales	Flammeovirgaceae	Fulvivirga
DN40713_c0_g1	286	87.3	5	4.6	DN40713_c0_g1_i1	G121032	G1210321		286	87.28	5	4.59	100	CDS	285	57.89	-1	LysR family hydrogen peroxide-inducible transcriptional activator	KO:K04761	Bacteria	Bacteroidetes	Cytophagia	Cytophagales	Flammeovirgaceae	Fulvivirga
DN47510_c0_g1	382	183	5	2.2	DN47510_c0_g1_i1	G132834	G1328341		382	183	5	2.19	100	CDS	381	53.66	1	HP	HPrule	Bacteria	Bacteroidetes	Cytophagia	Cytophagales	Flammeovirgaceae	Fulvivirga
DN5653_c0_g1	577	378	23	4.9	DN5653_c0_g1_i1	G142324	G1423241		577	378	23	4.87	100	CDS	576	63.27	1	HP	HPrule	Bacteria	Bacteroidetes	Cytophagia	Cytophagales	Flammeovirgaceae	Fulvivirga
DN16166_c0_g1	267	69.8	5	5.7	DN16166_c0_g1_i1	G117248	G1172481		267	69.78	5	5.74	100	CDS	267	67.42	1	dolichol-phosphate mannosyltransferase	KO:K00721	Bacteria	Bacteroidetes	Cytophagia	Cytophagales	Flammeovirgaceae	Marivirga
DN18526_c0_g1	512	313	11	2.8	DN18526_c0_g1_i1	G140261	G1402611		512	313	11	2.81	100	CDS	510	49.07	1	HP	HPrule	Bacteria	Bacteroidetes	Cytophagia	Cytophagales	Flammeovirgaceae	Marivirga
DN18718_c0_g1	314	115	4	2.8	DN18718_c0_g1_i1	G125423	G1254231		314	115	4	2.79	100	CDS	312	81.73	1	ketol-acid reductoisomerase	KO:K00053	Bacteria	Bacteroidetes	Cytophagia	Cytophagales	Flammeovirgaceae	Marivirga
DN19851_c0_g1	203	24.1	3	10	DN19851_c0_g1_i1	G100620	G1006201		203	24.07	3	9.98	100	CDS	183	42.62	1	uncharacterized protein (DUF2461 family)	COG5587	Bacteria	Bacteroidetes	Cytophagia	Cytophagales	Flammeovirgaceae	Marivirga
DN31508_c0_g1	285	86.3	6	5.6	DN31508_c0_g1_i1	G120824	G1208241	1	285	86.32	6	5.57	100	CDS	171	73.21	1	LemA protein	KO:K03744	Bacteria	Bacteroidetes	Cytophagia	Cytophagales	Flammeovirgaceae	Marivirga
DN31508_c0_g1	285	86.3	6	5.6	DN31508_c0_g1_i1	G120824	G1208242	2	285	86.32	6	5.57	100	CDS	84	#N/A	1	HP	HPrule	Bacteria	Bacteroidetes	Cytophagia	Cytophagales	Flammeovirgaceae	Marivirga
DN32048_c0_g1	502	303	10	2.6	DN32048_c0_g1_i1	G139870	G1398701		502	303	10	2.64	100	CDS	501	82.04	-1	ligand-binding sensor domain-containing protein	COG3292	Bacteria	Bacteroidetes	Cytophagia	Cytophagales	Flammeovirgaceae	Marivirga
DN40187_c0_g1	259	62.9	6	7.6	DN40187_c0_g1_i1	G115610	G1156101		259	62.86	6	7.64	100	CDS	258	68.24	-1	DNA topoisomerase-1	KO:K03168	Bacteria	Bacteroidetes	Cytophagia	Cytophagales	Flammeovirgaceae	Marivirga
DN42859_c0_g1	201	23	3	10.4	DN42859_c0_g1_i1	G100217	G1002171		201	23.03	3	10.43	100	CDS	201	86.36	-1	N-ethylmaleimide reductase	KO:K10680	Bacteria	Bacteroidetes	Cytophagia	Cytophagales	Flammeovirgaceae	Marivirga
DN44360_c0_g1	669	470	17	2.9	DN44360_c0_g1_i1	G144346	G1443461		669	470	17	2.9	100	CDS	666	74.89	-1	methylmalonyl-CoA mutase	KO:K11942	Bacteria	Bacteroidetes	Cytophagia	Cytophagales	Flammeovirgaceae	Marivirga
DN20834_c0_g1	355	156	8	4.1	DN20834_c0_g1_i1	G130312	G1303121		355	156	8	4.11	100	CDS	279	77.17	1	chaperonin GroES	KO:K04078	Bacteria	Bacteroidetes	Cytophagia	Cytophagales	Flammeovirgaceae	Nafulsella
DN21926_c0_g1	256	60.4	4	5.3	DN21926_c0_g1_i1	G114868	G1148681		256	60.35	4	5.31	100	CDS	252	62.65	-1	outer membrane receptor protein involved in Fe transport	COG1629	Bacteria	Bacteroidetes	Cytophagia	Cytophagales	Flammeovirgaceae	Nafulsella
DN24076_c0_g1	275	77	4	4.2	DN24076_c0_g1_i1	G118863	G1188631		275	76.97	4	4.16	100	CDS	273	65.17	-1	membrane-bound lytic murein transglycosylase F	KO:K18691	Bacteria	Bacteroidetes	Cytophagia	Cytophagales	Flammeovirgaceae	Nafulsella
DN30543_c0_g1	497	298	12	3.2	DN30543_c0_g1_i1	G139667	G1396671		497	298	12	3.22	100	CDS	495	47.27	-1	TolB protein	KO:K03641	Bacteria	Bacteroidetes	Cytophagia	Cytophagales	Flammeovirgaceae	Nafulsella
DN30615_c0_g1	424	225	6	2.1	DN30615_c0_g1_i1	G135885	G1358851		424	225	6	2.14	100	CDS	195	64.52	1	magnesium chelatase subunit I	KO:K03405	Bacteria	Bacteroidetes	Cytophagia	Cytophagales	Flammeovirgaceae	Nafulsella
DN39462_c0_g1	281	82.5	5	4.9	DN39462_c0_g1_i1	G120085	G1200851		281	82.54	5	4.85	100	CDS	279	40	-1	beta-lactamase	pfam00144	Bacteria	Bacteroidetes	Cytophagia	Cytophagales	Flammeovirgaceae	Nafulsella
DN46424_c0_g1	518	319	9	2.3	DN46424_c0_g1_i1	G140521	G1405211		518	319	9	2.26	100	CDS	516	44.04	-1	peptidase S46-like protein	pfam10459	Bacteria	Bacteroidetes	Cytophagia	Cytophagales	Flammeovirgaceae	Nafulsella
DN27649_c0_g1	318	119	5	3.4	DN27649_c0_g1_i1	G125984	G1259841		318	119	5	3.36	100	CDS	315	79.05	1	ABC-2 type transport system ATP-binding protein	KO:K01990	Bacteria	Bacteroidetes	Cytophagia	Cytophagales	Flammeovirgaceae	Reichenbachiella
DN29291_c0_g1	464	265	10	3	DN29291_c0_g1_i1	G138187	G1381871		464	265	10	3.02	100	CDS	447	40.56	-1	HP	HPrule	Bacteria	Bacteroidetes	Cytophagia	Cytophagales	Flammeovirgaceae	Reichenbachiella
DN38542_c0_g1	553	354	19	4.3	DN38542_c0_g1_i1	G141608	G1416081		553	354	19	4.3	100	CDS	507	46.2	1	HP	HPrule	Bacteria	Bacteroidetes	Cytophagia	Cytophagales	Flammeovirgaceae	Reichenbachiella
DN44031_c0_g1	227	38.5	4	8.3	DN44031_c0_g1_i1	G107464	G1074641		227	38.47	4	8.33	100	CDS	225	36	-1	HP	HPrule	Bacteria	Bacteroidetes	Cytophagia	Cytophagales	Flammeovirgaceae	Reichenbachiella
DN45176_c0_g1	421	222	8	2.9	DN45176_c0_g1_i1	G135689	G1356891		421	222	8	2.89	100	CDS	420	53.08	1	small conductance mechanosensitive channel	KO:K03442	Bacteria	Bacteroidetes	Cytophagia	Cytophagales	Flammeovirgaceae	Reichenbachiella
DN12919_c0_g1	1266	1067	31	2.3	DN12919_c0_g1_i1	G149057	G1490571		1266	1067	31	2.33	100	CDS	1263	73.75	1	aspartyl-tRNA synthetase	KO:K01876	Bacteria	Bacteroidetes	Cytophagia	Cytophagales	Flammeovirgaceae	Roseivirga
DN17736_c0_g1	406	207	7	2.7	DN17736_c0_g1_i1	G134618	G1346181		406	207	7	2.71	100	CDS	405	54.81	1	hemoglobin/transferrin/lactoferrin receptor protein	KO:K16087	Bacteria	Bacteroidetes	Cytophagia	Cytophagales	Flammeovirgaceae	Roseivirga
DN20847_c0_g1	245	51.5	3	4.7	DN20847_c0_g1_i1	G112204	G1122041		245	51.51	3	4.66	100	CDS	243	50	-1	arsenate reductase	KO:K00537	Bacteria	Bacteroidetes	Cytophagia	Cytophagales	Flammeovirgaceae	Roseivirga
DN22533_c0_g1	346	147	7	3.8	DN22533_c0_g1_i1	G129417	G1294171	1	346	147	7	3.81	100	CDS	144	#N/A	1	HP	HPrule	Bacteria	Bacteroidetes	Cytophagia	Cytophagales	Flammeovirgaceae	Roseivirga
DN22533_c0_g1	346	147	7	3.8	DN22533_c0_g1_i1	G129417	G1294172	2	346	147	7	3.81	100	CDS	207	76.81	1	cobalt-zinc-cadmium resistance protein CzcA	KO:K15726	Bacteria	Bacteroidetes	Cytophagia	Cytophagales	Flammeovirgaceae	Roseivirga
DN24008_c0_g1	649	450	15	2.7	DN24008_c0_g1_i1	G143976	G1439761		649	450	15	2.67	100	CDS	645	52.09	-1	Na+/proline symporter	COG0591	Bacteria	Bacteroidetes	Cytophagia	Cytophagales	Flammeovirgaceae	Roseivirga
DN26651_c0_g1	298	99	5	4	DN26651_c0_g1_i1	G123055	G1230551		298	99	5	4.04	100	CDS	294	50.59	1	CRISPR-associated endonuclease Csn1	KO:K09952	Bacteria	Bacteroidetes	Cytophagia	Cytophagales	Flammeovirgaceae	Roseivirga
DN32395_c0_g1	466	267	9	2.7	DN32395_c0_g1_i1	G138286	G1382861		466	267	9	2.7	100	CDS	462	60.39	-1	transposase InsO family protein	COG2801	Bacteria	Bacteroidetes	Cytophagia	Cytophagales	Flammeovirgaceae	Roseivirga
DN33961_c0_g1	234	43.3	5	9.2	DN33961_c0_g1_i1	G109262	G1092621		234	43.32	5	9.24	100	CDS	234	51.32	1	uncharacterized protein DUF4842	pfam16130	Bacteria	Bacteroidetes	Cytophagia	Cytophagales	Flammeovirgaceae	Roseivirga
DN35136_c0_g1	223	35.8	3	6.7	DN35136_c0_g1_i1	G106351	G1063511		223	35.82	3	6.71	100	CDS	222	79.45	-1	HP	HPrule	Bacteria	Bacteroidetes	Cytophagia	Cytophagales	Flammeovirgaceae	Roseivirga
DN40441_c0_g1	288	89.2	10	9	DN40441_c0_g1_i1	G121371	G1213711		288	89.2	10	8.98	100	CDS	285	38.64	1	HP	HPrule	Bacteria	Bacteroidetes	Cytophagia	Cytophagales	Flammeovirgaceae	Roseivirga
DN40465_c0_g1	575	376	12	2.6	DN40465_c0_g1_i1	G142264	G1422641		575	376	12	2.56	100	CDS	573	50.78	-1	HP	KO:K07047	Bacteria	Bacteroidetes	Cytophagia	Cytophagales	Flammeovirgaceae	Roseivirga
DN41222_c0_g1	565	366	10	2.2	DN41222_c0_g1_i1	G141966	G1419661		565	366	10	2.19	100	CDS	564	61.26	-1	methylmalonyl-CoA mutase	KO:K11942	Bacteria	Bacteroidetes	Cytophagia	Cytophagales	Flammeovirgaceae	Roseivirga
DN44454_c0_g1	281	82.5	55	53.4	DN44454_c0_g1_i1	G120102	G1201021		281	82.54	55	53.36	100	CDS	279	72.83	-1	HP	HPrule	Bacteria	Bacteroidetes	Cytophagia	Cytophagales	Flammeovirgaceae	Roseivirga
DN45990_c0_g1	249	54.7	4	5.9	DN45990_c0_g1_i1	G113375	G1133751		249	54.65	4	5.86	100	CDS	246	67.07	1	methylmalonyl-CoA mutase	KO:K11942	Bacteria	Bacteroidetes	Cytophagia	Cytophagales	Flammeovirgaceae	Roseivirga
DN48579_c0_g1	215	30.8	4	10.4	DN48579_c0_g1_i1	G104179	G1041791		215	30.82	4	10.39	100	CDS	213	55.88	-1	HP	HPrule	Bacteria	Bacteroidetes	Cytophagia	Cytophagales	Flammeovirgaceae	Roseivirga
DN6025_c0_g1	684	485	54	8.9	DN6025_c0_g1_i1	G144608	G1446081		684	485	54	8.92	100	CDS	501	68.67	1	thiol peroxidase	KO:K11065	Bacteria	Bacteroidetes	Cytophagia	Cytophagales	Flammeovirgaceae	Roseivirga
DN12942_c0_g1	238	46.2	3	5.2	DN12942_c0_g1_i1	G110240	G1102401		238	46.22	3	5.2	100	CDS	237	51.9	1	mannose/cellobiose epimerase-like protein (N-acyl-D-glucosamine 2-epimerase family)	COG2942	Bacteria	Bacteroidetes	Cytophagia	Cytophagales	Flammeovirgaceae	Sediminitomix
DN17263_c0_g1	965	766	60	6.3	DN17263_c0_g1_i1	G147609	G1476091		965	766	60	6.27	100	CDS	876	52.13	-1	iron complex outermembrane receptor protein	KO:K02014	Bacteria	Bacteroidetes	Cytophagia	Cytophagales	Flammeovirgaceae	Sediminitomix
DN21245_c0_g1	518	319	9	2.3	DN21245_c0_g1_i1	G140498	G1404981		518	319	9	2.26	100	CDS	453	41.27	1	two-component system nitrate/nitrite response regulator NarL	KO:K07684	Bacteria	Bacteroidetes	Cytophagia	Cytophagales	Flammeovirgaceae	Sediminitomix
DN24289_c0_g1	852	653	38	4.7	DN24289_c0_g1_i1	G146709	G1467091		852	653	38	4.66	100	CDS	615	39.41	-1	HP	HPrule	Bacteria	Bacteroidetes	Cytophagia	Cytophagales	Flammeovirgaceae	Sediminitomix
DN35049_c0_g1	222	35.2	3	6.8	DN35049_c0_g1_i1	G106047	G1060471		222	35.18	3	6.83	100	CDS	219	63.01	-1	uncharacterized protein DUF1343	pfam07075	Bacteria	Bacteroidetes	Cytophagia	Cytophagales	Flammeovirgaceae	Sediminitomix
DN35345_c0_g1	584	385	11	2.3	DN35345_c0_g1_i1	G142496	G1424961		584	385	11	2.29	100	CDS	582	46.56	1	N-acetylmuramoyl-L-alanine amidase	COG0860	Bacteria	Bacteroidetes	Cytophagia	Cytophagales	Flammeovirgaceae	Sediminitomix
DN41952_c0_g1	847	648	28	3.5	DN41952_c0_g1_i1	G146671	G1466711		847	648	28	3.46	100	CDS	846	83.69	-1	cytochrome c oxidase cbb3-type subunit I/II	KO:K15862	Bacteria	Bacteroidetes	Cytophagia	Cytophagales	Flammeovirgaceae	Sediminitomix
DN44724_c0_g1	417	218	10	3.7	DN44724_c0_g1_i1	G135433	G1354331		417	218	10	3.67	100	CDS	414	65.94	-1	peptidyl-dipeptidase Dcp	KO:K01284	Bacteria	Bacteroidetes	Cytophagia	Cytophagales	Flammeovirgaceae	Sediminitomix
DN46498_c0_g1	325	126	7	4.5	DN46498_c0_g1_i1	G126936	G1269361		325	126	7	4.45	100	CDS	264	82.76	1	peptidyl-prolyl cis-trans isomerase B (cyclophilin B)	KO:K03768	Bacteria	Bacteroidetes	Cytophagia	Cytophagales	Flammeovirgaceae	Sediminitomix
[truncated: 18,661 more rows]

## Sheet: Aequorivita
	Aequorivita
Nitrogen metabolism
[truncated: 3,199 more rows]

## Sheet: Aminobacter
Aminobacter
[truncated: 11 more rows]

[truncated: 25 more sheets: Aquamicrobium, Azoarcus, Bradymonas, Geofilum, Hoeflea, Hyphomicrobium, Idiomarina, Ignavibacteriales, Lentimicrobium, Marinicella, Marinobacter, Maritimibacter, Mesorhizobium, Methylophaga, Oceanibaculum, Paracoccus, Pseudomonas, Roseovarius, Stappia, Streptomyces …]
