# Supplementary material for: Dynamics of a methanol-fed marine denitrifying biofilm: 2—impact of environmental changes on the microbial community
Source: PeerJ. 2019 Aug 13;7:e7467. doi: 10.7717/peerj.7467 (PMC6697039; doi:10.7717/peerj.7467)
Supplement: Document S8 [file peerj-07-7467-s014.xlsx]

## Sheet: Figure 2
		Raw data Figure 2
		See legend Figure 2 for detail
			Ratio Biofilm/pure culture		Ratio -(pure culture/biofilm)
			2 to 5	>5	-2 to -5	>-5
		All genes----
		GP59 (3358) - 300N-23C	0.0863609	0.0259083	-0.0515188	-0.00446694
		GP59 (3358) - 900N-30C	0.101846	0.0256105	-0.0848719	-0.0136986
		GP59 (3358) - 0%NaCl	0.180465	0.0279929	-0.0419893	-0.132817
		NL23 (3600) - 0%NaCl	0.0683333	0.0175	-0.283056	-0.156667
		Nitrogen-----
		GP59 (61) - 300N-23C	0.213115	0.114754	-0.0163934	0
		GP59 (61) - 900N-30C	0.245902	0.0983607	0	-0.0983607
		GP59 (61) - 0%NaCl	0.229508	0.147541	-0.114754	-0.0163934
		NL23 (59) - 0%NaCl	0.20339	0.322034	-0.0677966	-0.0338983
		Iron trp/TonB-----
		GP59 (54) - 300N-23C	0.313725	0.313725	0	0
		GP59 (54) - 900N-30C	0.372549	0.27451	0	0
		GP59 (54) - 0%NaCl	0.215686	0.0588235	0	-0.0196078
		NL23 (31) - 0%NaCl	0.0322581	0.0645161	-0.129032	-0.258065
		GP59-Plasmides (103)----
		300N-23C	0	0	-0.291262	-0.0679612
		900N-30C	0	0	-0.252427	-0.475728
		0%NaCl	0	0	-0.116505	-0.883495

## Sheet: Figures S4 and S5
	Figure S4 and S5
	Variations in metabolisms of strain GP59 and NL23 between the pure cultures and the biofilm cultures
	See Figure 2 legend for detail
	Figure S4 raw data
		Ratio Biofilm/pure culture		Ratio -(pure culture/biofilm)												0%NaCl biofilm cultures	Ratio Biofilm/pure culture		Ratio -(pure culture/biofilm)
		2 to 5	>5	-2 to -5	>-5												2 to 5	>5	-2 to -5	>-5
	All genes (3358)-----															All genes-----
	300N-23C	0.0863609	0.0259083	-0.0515188	-0.00446694											GP59 (3358)	0.180465	0.0279929	-0.0419893	-0.132817
	900N-30C	0.101846	0.0256105	-0.0848719	-0.0136986											NL23 (3600)	0.0683333	0.0175	-0.283056	-0.156667
	Intergenic sequences (752)-----															Intergenic sequences-----
	300N-23C	0.103723	0.018617	-0.0452128	-0.0132979											GP59 (752)	0.204787	0.0239362	-0.0412234	-0.18883
	900N-30C	0.12633	0.025266	-0.105053	-0.0212766											NL23 (1253)	0.0518755	0.00957702	-0.321628	-0.268955
	Carbohydrate (138)-----															Carbohydrate-----
	300N-23C	0.0652174	0.0362319	-0.00724638	0											GP59 (138)	0.15942	0.0869565	-0.0217391	-0.0217391
	900N-30C	0.115942	0.0289855	-0.0289855	-0.00724638											NL23 (157)	0.0955414	0.0382166	-0.191083	-0.0700637
	Energy (159)-----															Energy----------
	300N-23C	0.0880503	0.0628931	-0.0314465	-0.00628931											GP59 (159)	0.201258	0.106918	-0.0503145	0
	900N-30C	0.081761	0.0503145	-0.0377358	-0.0377358											NL23 (176)	0.244318	0.0909091	-0.107955	-0.0965909
	Nitrogen (61)-----															Nitrogen-----
	300N-23C	0.213115	0.114754	-0.0163934	0											GP59 (61)	0.229508	0.147541	-0.114754	-0.0163934
	900N-30C	0.245902	0.0983607	0	-0.0983607											NL23 (59)	0.20339	0.322034	-0.0677966	-0.0338983
	Iron trp/TonB (54)-----															Iron trp/TonB-----
	300N-23C	0.313725	0.313725	0	0											GP59 (54)	0.215686	0.0588235	0	-0.0196078
	900N-30C	0.372549	0.27451	0	0											NL23 (31)	0.0322581	0.0645161	-0.129032	-0.258065
	Lipid (34)-----															Lipid-----------
	300N-23C	0.0294118	0	0	0											GP59 (34)	0.147059	0	-0.0294118	0
	900N-30C	0	0	-0.0294118	0											NL23 (54)	0.166667	0.0185185	-0.148148	-0.0740741
	Nucleotide (74)-----															Nucleotide-----
	300N-23C	0.0405405	0.0135135	-0.0135135	-0.0135135											GP59 (74)	0.121622	0	-0.0405405	0
	900N-30C	0.0675676	0.0135135	-0.0405405	0											NL23 (66)	0.0909091	0.0454545	-0.181818	-0.0606061
	Amino acid (152)-----															Amino acid-----
	300N-23C	0.0394737	0	-0.0263158	-0.00657895											GP59 (152)	0.131579	0.0131579	-0.0460526	-0.0263158
	900N-30C	0.0723684	0	-0.0394737	0											NL23 (186)	0.0537634	0.0215054	-0.241935	-0.0591398
	Glycan (38)-----															Glycan----------
	300N-23C	0	0	0	0											GP59 (38)	0.0263158	0	0	0
	900N-30C	0.0526316	0	-0.0263158	0											NL23 (28)	0	0.0357143	-0.285714	-0.0357143
	Cofactors and vitamins (131)-----															Cofactors and vitamins-----
	300N-23C	0.0381679	0.0152672	-0.0152672	0											GP59 (131)	0.0992366	0	-0.0381679	-0.00763359
	900N-30C	0.0458015	0.0152672	-0.0305344	0											NL23 (158)	0.113924	0.00632911	-0.297468	-0.0886076
	Genetic Information Processing (183)-----															Genetic Information Processing-----
	300N-23C	0.0163934	0	-0.10929	0											GP59 (183)	0.0546448	0.00546448	-0.10929	-0.0382514
	900N-30C	0.010929	0.00546448	-0.103825	0											NL23 (177)	0.220339	0.00564972	-0.19774	-0.0564972
	Environmental Information Processing (177)-----															Environmental Information Processing-----
	300N-23C	0.0734463	0	-0.0960452	-0.00564972											GP59 (177)	0.19209	0.0112994	-0.0451977	-0.0960452
	900N-30C	0.0677966	0	-0.0564972	-0.0734463											NL23 (175)	0.108571	0.0457143	-0.182857	-0.125714
	Cellular Processes (142)-----															Cellular Processes-----
	300N-23C	0.0140845	0.0140845	-0.161972	-0.0140845											GP59 (142)	0.105634	0.00704225	-0.084507	-0.112676
	900N-30C	0.028169	0.00704225	-0.126761	-0.0140845											NL23 (86)	0.0697674	0	-0.139535	-0.0581395
	Plasmides (103)----
	300N-23C	0	0	-0.291262	-0.0679612											GP59-plasmides (103)	0	0	-0.116505	-0.883495
	900N-30C	0	0	-0.252427	-0.475728
	Mu-Like prophages (102)----															GP59-Mu-Like prophages (102)	0	0	0	-0.960784
	300N-23C	0.254902	0	0	-0.00980392
	900N-30C	0	0	0	0											GP59-11 kb intercalated sequences (15)	0	0	0.2	-0.733333
	11 kb intercalated sequences (15)----
	300N-23C	0.666667	0.333333	0	0
	900N-30C	1	0	0	0

## Sheet: 3 strains
				Supplemental information regarding the metatranscriptome analysis associated to strain JAM1
				Variations in metabolisms of strain JAM1, strain GP59 and NL23 between pure cultures and the biofilm cultures
				See Figure 2 legend for detail
					Ratio Biofilm/pure cult		Ratio -(pure cult/biofilm)								0%NaCl biofilm cultures	Ratio Biofilm/pure cult		Ratio -(pure cult/biofilm)
					2 to 5	>5	-2 to -5	>-5								2 to 5	>5	-2 to -5	>-5
				All genes-----											All genes-----
				300N-23C---JAM1 (3095)	0.100485	0.022294	-0.114378	-0.0717286							JAM1 (3095)	0.137964	0.0300485	-0.120517	-0.0927302
				GP59 (3358)	0.0863609	0.0259083	-0.0515188	-0.00446694							GP59 (3358)	0.180465	0.0279929	-0.0419893	-0.132817
				900N-30C---JAM1 (3095)	0.101777	0.0203554	-0.104362	-0.0649435							NL23 (3600)	0.0683333	0.0175	-0.283056	-0.156667
				GP59 (3358)	0.101846	0.0256105	-0.0848719	-0.0136986
															Intergenic sequences-----
				Intergenic sequences-----											JAM1 (681)	0.17768	0.020558	-0.0807636	-0.155653
				300N-23C---JAM1 (681)	0.133627	0.0220264	-0.0910426	-0.114537							GP59 (752)	0.204787	0.0239362	-0.0412234	-0.18883
				GP59 (752)	0.103723	0.018617	-0.0452128	-0.0132979							NL23 (1253)	0.0518755	0.00957702	-0.321628	-0.268955
				900N-30C---JAM1 (681)	0.142438	0.0264317	-0.0910426	-0.105727
				GP59 (752)	0.12633	0.025266	-0.105053	-0.0212766							Carbohydrate metabolism-----
															JAM1 (140)	0.0857143	0.0785714	-0.157143	-0.0428571
				Carbohydrate metabolism-----											GP59 (138)	0.15942	0.0869565	-0.0217391	-0.0217391
				300N-23C---JAM1 (140)	0.05	0.0571429	-0.1	-0.05							NL23 (157)	0.0955414	0.0382166	-0.191083	-0.0700637
				GP59 (138)	0.0652174	0.0362319	-0.00724638	0
				900N-30C---JAM1 (140)	0.0428571	0.0428571	-0.1	-0.05							Energy metabolism-----
				GP59 (138)	0.115942	0.0289855	-0.0289855	-0.00724638							JAM1 (156)	0.134615	0.102564	-0.108974	-0.0192308
															GP59 (159)	0.201258	0.106918	-0.0503145	0
				Energy metabolism-----											NL23 (176)	0.244318	0.0909091	-0.107955	-0.0965909
				300N-23C---JAM1 (156)	0.102564	0.0641026	-0.115385	-0.0192308
				GP59 (159)	0.0880503	0.0628931	-0.0314465	-0.00628931							Nitrogen metabolism-----
				900N-30C---JAM1 (156)	0.0897436	0.0641026	-0.115385	-0.0192308							JAM1 (58)	0.241379	0.155172	-0.12069	-0.103448
				GP59 (159)	0.081761	0.0503145	-0.0377358	-0.0377358							GP59 (61)	0.229508	0.147541	-0.114754	-0.0163934
															NL23 (59)	0.20339	0.322034	-0.0677966	-0.0338983
				Nitrogen metabolism-----
				300N-23C---JAM1 (58)	0.172414	0.0862069	-0.103448	0							Iron trp/TonB-----
				GP59 (61)	0.213115	0.114754	-0.0163934	0							JAM1 (62)	0.129032	0.0322581	-0.0322581	-0.193548
				900N-30C---JAM1 (58)	0.172414	0.12069	-0.137931	-0.0517241							GP59 (54)	0.215686	0.0588235	0	-0.0196078
				GP59 (61)	0.245902	0.0983607	0	-0.0983607							NL23 (31)	0.0322581	0.0645161	-0.129032	-0.258065
				Iron trp/TonB-----											Lipid metabolism-----
				300N-23C---JAM1 (62)	0.258065	0.177419	-0.129032	-0.129032							JAM1 (36)	0.222222	0	-0.0555556	-0.0555556
				GP59 (54)	0.313725	0.313725	0	0							GP59 (34)	0.147059	0	-0.0294118	0
				900N-30C---JAM1 (62)	0.306452	0.112903	-0.145161	-0.0645161							NL23 (54)	0.166667	0.0185185	-0.148148	-0.0740741
				GP59 (54)	0.372549	0.27451	0	0
															Nucleotide metabolism-----
				Lipid metabolism-----											JAM1 (74)	0.0540541	0	-0.162162	-0.0135135
				300N-23C---JAM1 (36)	0.166667	0	-0.0555556	-0.0555556							GP59 (74)	0.121622	0	-0.0405405	0
				GP59 (34)	0.0294118	0	0	0							NL23 (66)	0.0909091	0.0454545	-0.181818	-0.0606061
				900N-30C---JAM1 (36)	0.194444	0	-0.0833333	-0.0555556
				GP59 (34)	0	0	-0.0294118	0							Amino acid metabolism-----
															JAM1 (151)	0.112583	0.013245	-0.225166	-0.0662252
				Nucleotide metabolism-----											GP59 (152)	0.131579	0.0131579	-0.0460526	-0.0263158
				300N-23C---JAM1 (74)	0.027027	0	-0.108108	-0.0135135							NL23 (186)	0.0537634	0.0215054	-0.241935	-0.0591398
				GP59 (74)	0.0405405	0.0135135	-0.0135135	-0.0135135
				900N-30C---JAM1 (74)	0.0405405	0	-0.121622	0							Glycan biosynthesis and metabolism-----
				GP59 (74)	0.0675676	0.0135135	-0.0405405	0							JAM1 (40)	0.05	0	-0.275	-0.075
															GP59 (38)	0.0263158	0	0	0
				Amino acid metabolism-----											NL23 (28)	0	0.0357143	-0.285714	-0.0357143
				300N-23C---JAM1 (151)	0.0529801	0.00662252	-0.178808	-0.0463576
				GP59 (152)	0.0394737	0	-0.0263158	-0.00657895							Metabolism of cofactors and vitamins-----
				900N-30C---JAM1 (151)	0.0596026	0.00662252	-0.211921	-0.0662252							JAM1 (185)	0.0864865	0.00540541	-0.183784	-0.0216216
				GP59 (152)	0.0723684	0	-0.0394737	0							GP59 (131)	0.0992366	0	-0.0381679	-0.00763359
															NL23 (158)	0.113924	0.00632911	-0.297468	-0.0886076
				Glycan biosynthesis and metabolism-----
				300N-23C---JAM1 (40)	0.025	0	-0.075	-0.075							Genetic Information Processing-----
				GP59 (38)	0	0	0	0							JAM1 (178)	0.0617978	0.00561798	-0.342697	-0.0224719
				900N-30C---JAM1 (40)	0.025	0	-0.075	-0.075							GP59 (183)	0.0546448	0.00546448	-0.10929	-0.0382514
				GP59 (38)	0.0526316	0	-0.0263158	0							NL23 (177)	0.220339	0.00564972	-0.19774	-0.0564972
				Metabolism of cofactors and vitamins-----											Environmental Information Processing-----
				300N-23C---JAM1 (185)	0.0810811	0.00540541	-0.156757	-0.0216216							JAM1 (172)	0.133721	0.0523256	-0.0872093	-0.0639535
				GP59 (131)	0.0381679	0.0152672	-0.0152672	0							GP59 (177)	0.19209	0.0112994	-0.0451977	-0.0960452
				900N-30C---JAM1 (185)	0.0594595	0.00540541	-0.162162	-0.00540541							NL23 (175)	0.108571	0.0457143	-0.182857	-0.125714
				GP59 (131)	0.0458015	0.0152672	-0.0305344	0
															Cellular Processes-----
				Genetic Information Processing-----											JAM1 (164)	0.0792683	0.0365854	-0.182927	-0.0426829
				300N-23C---JAM1 (178)	0.0337079	0	-0.359551	0							GP59 (142)	0.105634	0.00704225	-0.084507	-0.112676
				GP59 (183)	0.0163934	0	-0.10929	0							NL23 (86)	0.0697674	0	-0.139535	-0.0581395
				900N-30C---JAM1 (178)	0.0168539	0.00561798	-0.320225	0
				GP59 (183)	0.010929	0.00546448	-0.103825	0
															GP59-plasmides (103)	0	0	-0.116505	-0.883495
				Environmental Information Processing-----
				300N-23C---JAM1 (172)	0.0755814	0.00581395	-0.151163	-0.0523256							GP59-Mu-Like prophages (102)	0	0	0	-0.960784
				GP59 (177)	0.0734463	0	-0.0960452	-0.00564972
				900N-30C---JAM1 (172)	0.0697674	0.00581395	-0.139535	-0.0581395							GP59-11 kb intercalated sequences (15)	0	0	0.2	-0.733333
				GP59 (177)	0.0677966	0	-0.0564972	-0.0734463
				Cellular Processes-----
				300N-23C---JAM1 (164)	0.0426829	0.00609756	-0.20122	-0.0426829
				GP59 (142)	0.0140845	0.0140845	-0.161972	-0.0140845
				900N-30C---JAM1 (164)	0.0426829	0.00609756	-0.128049	-0.0426829
				GP59 (142)	0.028169	0.00704225	-0.126761	-0.0140845
				GP59-plasmides (103), 300N-23C	0	0	-0.291262	-0.0679612
				900N-30C	0	0	-0.252427	-0.475728
				GP59-Mu-Like prophages (102), 300N-23C	0.254902	0	0	-0.00980392
				900N-30C	0	0	0	0
				GP59-11 kb intercalated sequences (15), 300N-23C	0.666667	0.333333	0	0
				900N-30C	1	0	0	0
