# Supplementary material for: Dynamics of a methanol-fed marine denitrifying biofilm: 2—impact of environmental changes on the microbial community
Source: PeerJ. 2019 Aug 13;7:e7467. doi: 10.7717/peerj.7467 (PMC6697039; doi:10.7717/peerj.7467)
Supplement: Document S10 [file peerj-07-7467-s016.xlsx]

## Sheet: Instructions
	• Rawdata for Figure 3B, Table 5 and Figure S4 related to strain NL23
From the genome strain NL23 the amino acid sequences derived from RAST annotation system was submitted to the Kegg BlastKoala analysis for annotation, with the option Hyphomicrobium as taxonomy group and Genus prokaryotes
		Results were put in the KEGG linkgenome ad KEGG link plasmid
KEGG metabolisms
	Specific KEGG metabolism pathways were selected and the TPM and the Ratio Biofilm to pure cultures were added for the correspond genes
		Carbohydrate metabolism
		Energy metabolism
		Lipid metabolism
		Nucleotide metabolism
		Amino acid metabolism
		Glycan biosynthesis and metabolism
		Metabolism of cofactors and vitamins
		Genetic Information Processing
		Environmental Information Processing
		Cellular community - prokaryotes
	Doublons were removed, and the number of genes with ratio between 2 and 5 and >5 were summed
		This data was transferred in Fig. 2 and Figures S3 and S4
All genes
	The ratios biofilm to pure cultures were associated to all NL23 genes and intergenic sequences
	The list of sequences were split in genes and intergenic sequences and ordered for the highest ratio to the lowest
The next spreadsheets are selected metabolism pathways illustrated in Figures 2 and 3, and Figure S4
	The TPM and the ratio Biofilm to pure cultures were added to each gene
	Doublons were removed, and the number of genes with ratio between 2 and 5 and >5 were summed
	In Figure 3B, the thickness of the arrows is proportional of the Ratio values
		Biofilm/pure culture ratios above 2 mean more expression in the biofilm
		Biofilm/pure culture ratios below 0.5 were transformed in -1(pure culture/biofilm)
		Pure culture/biofilm ratio above -2 (more negative) mean more expression in pure culture
		Ratio P/B	Ratio B/P	Arrows' thickness
		-(2-5)	2-5	2
		-(5-10)	5-10	3
		-(10-15)	10-15	4
		-(15-20)	15-20	5
		-(20-25)	20-25	6
		-(25-30)	25-30	7
		-(30-35)	30-35	8
		-(35-40)	35-40	9
		-(40-45)	40-45	10
		-(45-50)	45-50	11
		-(50-55)	50-55	12
		-(55-60)	55-60	13
		Blue	Red

## Sheet: KEGGgenLink
Query	KO	Definition	Score	Second best
fig|1029756.3.peg.1 (221)			85
fig|1029756.3.peg.2 (507)	K03593	mrp; ATP-binding protein involved in chromosome partitioning	249
fig|1029756.3.peg.3 (432)	K21430	yliI; aldose sugar dehydrogenase [EC:1.1.5.-]	346
fig|1029756.3.peg.4 (182)			239
fig|1029756.3.peg.5 (779)	K02014	TC.FEV.OM; iron complex outermembrane recepter protein	383
fig|1029756.3.peg.6 (419)			397
fig|1029756.3.peg.7 (468)	K01251	E3.3.1.1; adenosylhomocysteinase [EC:3.3.1.1]	566
fig|1029756.3.peg.8 (101)	K11189	PTS-HPR; phosphocarrier protein	66
fig|1029756.3.peg.9 (134)	K02793	PTS-Man-EIIA; PTS system, mannose-specific IIA component [EC:2.7.1.191]	174
fig|1029756.3.peg.10 (163)			54
fig|1029756.3.peg.11 (637)	K14980	chvG; two-component system, OmpR family, sensor histidine kinase ChvG [EC:2.7.13.3]	283
fig|1029756.3.peg.12 (235)	K14981	chvI; two-component system, OmpR family, response regulator ChvI	264
fig|1029756.3.peg.13 (255)	K07226	hugZ; heme iron utilization protein	131
fig|1029756.3.peg.14 (602)	K01596	E4.1.1.32; phosphoenolpyruvate carboxykinase (GTP) [EC:4.1.1.32]	329
fig|1029756.3.peg.15 (37)
fig|1029756.3.peg.16 (422)			10
fig|1029756.3.peg.17 (322)			163
fig|1029756.3.peg.18 (305)			3	K01449	1
fig|1029756.3.peg.19 (121)			11	K03534	1
fig|1029756.3.peg.20 (72)			18	K07726	1
fig|1029756.3.peg.21 (62)			7	K09795	1
fig|1029756.3.peg.22 (50)
fig|1029756.3.peg.23 (39)			18	K03470	1
fig|1029756.3.peg.24 (150)			89
fig|1029756.3.peg.25 (150)			17	K06024	1
fig|1029756.3.peg.26 (891)	K13582	podJ; localization factor PodJL	35	K07126	1
fig|1029756.3.peg.27 (310)	K07090	uncharacterized protein	248
fig|1029756.3.peg.28 (300)			118
fig|1029756.3.peg.29 (246)	K06953	uncharacterized protein	180
fig|1029756.3.peg.30 (819)	K03724	lhr; ATP-dependent helicase Lhr and Lhr-like helicase [EC:3.6.4.-]	695
fig|1029756.3.peg.31 (70)			1	K00281	1
fig|1029756.3.peg.32 (93)			52
fig|1029756.3.peg.33 (363)	K00254	DHODH; dihydroorotate dehydrogenase [EC:1.3.5.2]	276
fig|1029756.3.peg.34 (114)			112
fig|1029756.3.peg.35 (505)			77
fig|1029756.3.peg.36 (558)	K04566	lysK; lysyl-tRNA synthetase, class I [EC:6.1.1.6]	544
fig|1029756.3.peg.37 (602)			56	K04044	1
fig|1029756.3.peg.38 (66)			2
fig|1029756.3.peg.39 (56)			1	K03811	1
fig|1029756.3.peg.40 (292)	K03928	yvaK; carboxylesterase [EC:3.1.1.1]	110
fig|1029756.3.peg.41 (169)			55
fig|1029756.3.peg.42 (412)	K02004	ABC.CD.P; putative ABC transport system permease protein	181
fig|1029756.3.peg.43 (251)	K02003	ABC.CD.A; putative ABC transport system ATP-binding protein	146
fig|1029756.3.peg.44 (368)	K02005	ABC.CD.TX; HlyD family secretion protein	20	K03543	5
fig|1029756.3.peg.45 (1037)			773	K03296	83
fig|1029756.3.peg.46 (419)			160
fig|1029756.3.peg.47 (224)			66
fig|1029756.3.peg.48 (271)			19	K01809	1
fig|1029756.3.peg.49 (64)			13
fig|1029756.3.peg.50 (430)	K00790	murA; UDP-N-acetylglucosamine 1-carboxyvinyltransferase [EC:2.5.1.7]	523
fig|1029756.3.peg.51 (168)			2	K03787	1
fig|1029756.3.peg.52 (336)
fig|1029756.3.peg.53 (74)			2	K08256	1
fig|1029756.3.peg.54 (397)			234
fig|1029756.3.peg.55 (47)			1	K13816	1
fig|1029756.3.peg.56 (69)			1	K00096	1
fig|1029756.3.peg.57 (625)			8	K06919	1
fig|1029756.3.peg.58 (56)			7	K06888	1
fig|1029756.3.peg.59 (237)			132
fig|1029756.3.peg.60 (83)	K09862	uncharacterized protein	21
fig|1029756.3.peg.61 (269)	K06287	maf; septum formation protein	182
fig|1029756.3.peg.62 (231)	K10914	crp; CRP/FNR family transcriptional regulator, cyclic AMP receptor protein	108
fig|1029756.3.peg.63 (433)	K01768	E4.6.1.1; adenylate cyclase [EC:4.6.1.1]	166	K01769	16
fig|1029756.3.peg.64 (76)			4
fig|1029756.3.peg.65 (130)			104
fig|1029756.3.peg.66 (168)			133
fig|1029756.3.peg.67 (432)	K00013	hisD; histidinol dehydrogenase [EC:1.1.1.23]	553
fig|1029756.3.peg.68 (147)			133
fig|1029756.3.peg.69 (156)			101
fig|1029756.3.peg.70 (123)			17	K10914	7
fig|1029756.3.peg.71 (385)			27	K02847	1
fig|1029756.3.peg.72 (255)	K02017	modC; molybdate transport system ATP-binding protein [EC:3.6.3.29]	88
fig|1029756.3.peg.73 (232)	K02018	modB; molybdate transport system permease protein	213
fig|1029756.3.peg.74 (666)			295
fig|1029756.3.peg.75 (372)			197
fig|1029756.3.peg.76 (218)			148	K17939	15
fig|1029756.3.peg.77 (198)			138	K19428	31
fig|1029756.3.peg.78 (408)			141
fig|1029756.3.peg.79 (538)			122
fig|1029756.3.peg.80 (227)	K13018	wbpD; UDP-2-acetamido-3-amino-2,3-dideoxy-glucuronate N-acetyltransferase [EC:2.3.1.201]	73
fig|1029756.3.peg.81 (431)	K02474	wbpO; UDP-N-acetyl-D-galactosamine dehydrogenase [EC:1.1.1.-]	330
fig|1029756.3.peg.82 (349)	K13020	wlbA; UDP-N-acetyl-2-amino-2-deoxyglucuronate dehydrogenase [EC:1.1.1.335]	295
fig|1029756.3.peg.83 (383)	K13017	wbpE; UDP-2-acetamido-2-deoxy-ribo-hexuluronate aminotransferase [EC:2.6.1.98]	261
fig|1029756.3.peg.84 (361)	K13019	wbpI; UDP-GlcNAc3NAcA epimerase [EC:5.1.3.23]	262
fig|1029756.3.peg.85 (631)	K01953	asnB; asparagine synthase (glutamine-hydrolysing) [EC:6.3.5.4]	206
fig|1029756.3.peg.86 (480)			22
fig|1029756.3.peg.87 (858)	K09691	ABC-2.LPSE.A; lipopolysaccharide transport system ATP-binding protein	17	K09693	3
fig|1029756.3.peg.88 (184)	K09690	ABC-2.LPSE.P; lipopolysaccharide transport system permease protein	31
fig|1029756.3.peg.89 (473)			14	K14126	1
fig|1029756.3.peg.90 (315)			14	K07755	1
fig|1029756.3.peg.91 (335)			124
fig|1029756.3.peg.92 (407)			3	K00208	1
fig|1029756.3.peg.93 (310)	K01784	galE; UDP-glucose 4-epimerase [EC:5.1.3.2]	73
fig|1029756.3.peg.94 (316)	K01784	galE; UDP-glucose 4-epimerase [EC:5.1.3.2]	71
fig|1029756.3.peg.95 (612)	K01953	asnB; asparagine synthase (glutamine-hydrolysing) [EC:6.3.5.4]	295
fig|1029756.3.peg.96 (214)			30	K00958	1
fig|1029756.3.peg.97 (367)			137
fig|1029756.3.peg.98 (609)	K01953	asnB; asparagine synthase (glutamine-hydrolysing) [EC:6.3.5.4]	177
fig|1029756.3.peg.99 (369)			178
fig|1029756.3.peg.100 (359)	K08679	E5.1.3.6; UDP-glucuronate 4-epimerase [EC:5.1.3.6]	209
fig|1029756.3.peg.101 (324)	K06041	kdsD; arabinose-5-phosphate isomerase [EC:5.3.1.13]	161
fig|1029756.3.peg.102 (130)	K03413	cheY; two-component system, chemotaxis family, chemotaxis protein CheY	117
fig|1029756.3.peg.103 (344)	K03412	cheB; two-component system, chemotaxis family, protein-glutamate methylesterase/glutaminase [EC:3.1.1.61 3.5.1.44]	140
fig|1029756.3.peg.104 (77)			6	K19733	1
fig|1029756.3.peg.105 (151)			86
fig|1029756.3.peg.106 (289)	K11206	NIT1; deaminated glutathione amidase [EC:3.5.1.128]	303
fig|1029756.3.peg.107 (87)	K03676	grxC; glutaredoxin 3	72
fig|1029756.3.peg.108 (287)			66
fig|1029756.3.peg.109 (295)			203
fig|1029756.3.peg.110 (171)			89
fig|1029756.3.peg.111 (135)	K03574	mutT; 8-oxo-dGTP diphosphatase [EC:3.6.1.55]	127
fig|1029756.3.peg.112 (311)	K00648	fabH; 3-oxoacyl-[acyl-carrier-protein] synthase III [EC:2.3.1.180]	185
fig|1029756.3.peg.113 (46)
fig|1029756.3.peg.114 (1150)			429
fig|1029756.3.peg.115 (387)			52	K01547	1
fig|1029756.3.peg.116 (220)			59
fig|1029756.3.peg.117 (362)			180
fig|1029756.3.peg.118 (628)	K09883	cobT; cobaltochelatase CobT [EC:6.6.1.2]	503
fig|1029756.3.peg.119 (103)			1	K03282	1
fig|1029756.3.peg.120 (331)	K09882	cobS; cobaltochelatase CobS [EC:6.6.1.2]	394
fig|1029756.3.peg.121 (211)			212
fig|1029756.3.peg.122 (92)	K05527	bolA; BolA family transcriptional regulator, general stress-responsive regulator	82
fig|1029756.3.peg.123 (437)			308
fig|1029756.3.peg.124 (354)	K01735	aroB; 3-dehydroquinate synthase [EC:4.2.3.4]	228	K13829	40
fig|1029756.3.peg.125 (193)	K00891	E2.7.1.71; shikimate kinase [EC:2.7.1.71]	128	K13829	7
fig|1029756.3.peg.126 (48)			19	K00856	1
fig|1029756.3.peg.127 (76)
fig|1029756.3.peg.128 (508)			17	K12141	1
fig|1029756.3.peg.129 (322)	K04763	xerD; integrase/recombinase XerD	213
fig|1029756.3.peg.130 (327)	K01962	accA; acetyl-CoA carboxylase carboxyl transferase subunit alpha [EC:6.4.1.2 2.1.3.15]	305
fig|1029756.3.peg.131 (338)			134
fig|1029756.3.peg.132 (311)			151
fig|1029756.3.peg.133 (330)			119
fig|1029756.3.peg.134 (351)			113
fig|1029756.3.peg.135 (344)			1	K01843	1
fig|1029756.3.peg.136 (382)			117
fig|1029756.3.peg.137 (144)			132
fig|1029756.3.peg.138 (388)			146
fig|1029756.3.peg.139 (553)	K03333	choD; cholesterol oxidase [EC:1.1.3.6]	246
fig|1029756.3.peg.140 (312)	K11434	PRMT1; type I protein arginine methyltransferase [EC:2.1.1.319]	12
fig|1029756.3.peg.141 (463)	K05973	phaZ; poly(3-hydroxybutyrate) depolymerase [EC:3.1.1.75]	388
fig|1029756.3.peg.142 (50)
fig|1029756.3.peg.143 (213)	K07152	SCO1_2; protein SCO1/2	102
fig|1029756.3.peg.144 (474)	K15011	regB; two-component system, sensor histidine kinase RegB [EC:2.7.13.3]	251
fig|1029756.3.peg.145 (188)	K15012	regA; two-component system, response regulator RegA	185
fig|1029756.3.peg.146 (176)			82
fig|1029756.3.peg.147 (817)			253
fig|1029756.3.peg.148 (288)			9	K14055	1
fig|1029756.3.peg.149 (243)			119
fig|1029756.3.peg.150 (295)	K10563	mutM; formamidopyrimidine-DNA glycosylase [EC:3.2.2.23 4.2.99.18]	216
fig|1029756.3.peg.151 (262)	K01692	paaF; enoyl-CoA hydratase [EC:4.2.1.17]	297
fig|1029756.3.peg.152 (221)			10	K00946	1
fig|1029756.3.peg.153 (197)			15	K06957	1
fig|1029756.3.peg.154 (311)	K00611	OTC; ornithine carbamoyltransferase [EC:2.1.3.3]	284
fig|1029756.3.peg.155 (388)	K00821	argD; acetylornithine/N-succinyldiaminopimelate aminotransferase [EC:2.6.1.11 2.6.1.17]	337
fig|1029756.3.peg.156 (187)	K13583	gcrA; GcrA cell cycle regulator	133
fig|1029756.3.peg.157 (165)			124
fig|1029756.3.peg.158 (239)	K10773	NTH; endonuclease III [EC:4.2.99.18]	191
fig|1029756.3.peg.159 (261)	K02500	hisF; cyclase [EC:4.1.3.-]	283
fig|1029756.3.peg.160 (242)	K01814	hisA; phosphoribosylformimino-5-aminoimidazole carboxamide ribotide isomerase [EC:5.3.1.16]	256
fig|1029756.3.peg.161 (102)			9	K01869	1
fig|1029756.3.peg.162 (120)			8	K07000	1
fig|1029756.3.peg.163 (139)			72
fig|1029756.3.peg.164 (185)	K00762	pyrE; orotate phosphoribosyltransferase [EC:2.4.2.10]	122
fig|1029756.3.peg.165 (217)	K02501	hisH; glutamine amidotransferase [EC:2.4.2.-]	223
fig|1029756.3.peg.166 (192)			32
fig|1029756.3.peg.167 (197)	K01693	hisB; imidazoleglycerol-phosphate dehydratase [EC:4.2.1.19]	305
fig|1029756.3.peg.168 (190)	K01419	hslV; ATP-dependent HslUV protease, peptidase subunit HslV [EC:3.4.25.2]	185
fig|1029756.3.peg.169 (338)			63
fig|1029756.3.peg.170 (437)	K03667	hslU; ATP-dependent HslUV protease ATP-binding subunit HslU	475
fig|1029756.3.peg.171 (379)			33	K12132	1
fig|1029756.3.peg.172 (72)			2	K02238	1
fig|1029756.3.peg.173 (270)	K07146	UPF0176 protein	151
fig|1029756.3.peg.174 (318)	K01259	pip; proline iminopeptidase [EC:3.4.11.5]	214
fig|1029756.3.peg.175 (277)			218
fig|1029756.3.peg.176 (812)	K02470	gyrB; DNA gyrase subunit B [EC:5.99.1.3]	790
fig|1029756.3.peg.177 (399)	K03629	recF; DNA replication and repair protein RecF	229
fig|1029756.3.peg.178 (372)	K02338	dnaN; DNA polymerase III subunit beta [EC:2.7.7.7]	372
fig|1029756.3.peg.179 (524)	K02313	dnaA; chromosomal replication initiator protein	305
fig|1029756.3.peg.180 (148)			84
fig|1029756.3.peg.181 (87)	K02968	RP-S20; small subunit ribosomal protein S20	89
fig|1029756.3.peg.182 (184)			185
fig|1029756.3.peg.183 (285)	K01776	murI; glutamate racemase [EC:5.1.1.3]	234
fig|1029756.3.peg.184 (302)	K00208	fabI; enoyl-[acyl-carrier protein] reductase I [EC:1.3.1.9 1.3.1.10]	253
fig|1029756.3.peg.185 (410)	K00647	fabB; 3-oxoacyl-[acyl-carrier-protein] synthase I [EC:2.3.1.41]	450
fig|1029756.3.peg.186 (178)	K01716	fabA; 3-hydroxyacyl-[acyl-carrier protein] dehydratase / trans-2-decenoyl-[acyl-carrier protein] isomerase [EC:4.2.1.59 5.3.3.14]	241
fig|1029756.3.peg.187 (159)	K09826	irr; Fur family transcriptional regulator, iron response regulator	90
fig|1029756.3.peg.188 (185)			105
fig|1029756.3.peg.189 (332)	K00015	gyaR; glyoxylate reductase [EC:1.1.1.26]	368
fig|1029756.3.peg.190 (397)			11	K16922	1
fig|1029756.3.peg.191 (267)	K21029	moeB; molybdopterin-synthase adenylyltransferase [EC:2.7.7.80]	242
fig|1029756.3.peg.192 (596)	K07289	asmA; AsmA protein	52
fig|1029756.3.peg.193 (40)
fig|1029756.3.peg.194 (134)			14	K01674	1
fig|1029756.3.peg.195 (1045)			380	K07239	167
fig|1029756.3.peg.196 (574)			146
fig|1029756.3.peg.197 (44)
fig|1029756.3.peg.198 (202)			60
fig|1029756.3.peg.199 (87)			3	K02672	1
fig|1029756.3.peg.200 (117)			104
fig|1029756.3.peg.201 (573)	K02011	afuB; iron(III) transport system permease protein	431
fig|1029756.3.peg.202 (182)			150
fig|1029756.3.peg.203 (183)			76	K12262	5
fig|1029756.3.peg.204 (104)			8	K06978	1
fig|1029756.3.peg.205 (510)	K01966	PCCB; propionyl-CoA carboxylase beta chain [EC:6.4.1.3 2.1.3.15]	685
fig|1029756.3.peg.206 (51)			1	K00575	1
fig|1029756.3.peg.207 (131)	K01759	GLO1; lactoylglutathione lyase [EC:4.4.1.5]	133
fig|1029756.3.peg.208 (238)			1	K00605	1
fig|1029756.3.peg.209 (143)			140
fig|1029756.3.peg.210 (99)			36
fig|1029756.3.peg.211 (90)
fig|1029756.3.peg.212 (236)	K00765	hisG; ATP phosphoribosyltransferase [EC:2.4.2.17]	155
fig|1029756.3.peg.213 (392)	K02502	hisZ; ATP phosphoribosyltransferase regulatory subunit	198
fig|1029756.3.peg.214 (38)
fig|1029756.3.peg.215 (508)	K01892	HARS; histidyl-tRNA synthetase [EC:6.1.1.21]	411
fig|1029756.3.peg.216 (404)	K06941	rlmN; 23S rRNA (adenine2503-C2)-methyltransferase [EC:2.1.1.192]	390
fig|1029756.3.peg.217 (144)			5	K00362	1
fig|1029756.3.peg.218 (143)			5	K05587	1
fig|1029756.3.peg.219 (199)			15	K06178	2
fig|1029756.3.peg.220 (270)
fig|1029756.3.peg.221 (411)	K01940	argG; argininosuccinate synthase [EC:6.3.4.5]	474
fig|1029756.3.peg.222 (104)			18	K02888	1
fig|1029756.3.peg.223 (251)			31	K06595	1
fig|1029756.3.peg.224 (612)	K06207	typA; GTP-binding protein	643
fig|1029756.3.peg.225 (150)			7	K06893	3
fig|1029756.3.peg.226 (220)			126
fig|1029756.3.peg.227 (251)	K06890	uncharacterized protein	187
fig|1029756.3.peg.228 (862)	K02004	ABC.CD.P; putative ABC transport system permease protein	500
fig|1029756.3.peg.229 (231)	K02003	ABC.CD.A; putative ABC transport system ATP-binding protein	173
fig|1029756.3.peg.230 (231)	K10804	tesA; acyl-CoA thioesterase I [EC:3.1.2.- 3.1.1.5]	134
fig|1029756.3.peg.231 (189)	K01975	thpR; RNA 2',3'-cyclic 3'-phosphodiesterase [EC:3.1.4.58]	113
fig|1029756.3.peg.232 (469)	K06902	UMF1; MFS transporter, UMF1 family	321
fig|1029756.3.peg.233 (170)
fig|1029756.3.peg.234 (527)	K00602	purH; phosphoribosylaminoimidazolecarboxamide formyltransferase / IMP cyclohydrolase [EC:2.1.2.3 3.5.4.10]	413
fig|1029756.3.peg.235 (568)			365
fig|1029756.3.peg.236 (424)	K03500	rsmB; 16S rRNA (cytosine967-C5)-methyltransferase [EC:2.1.1.176]	258
fig|1029756.3.peg.237 (316)	K03799	htpX; heat shock protein HtpX [EC:3.4.24.-]	263
fig|1029756.3.peg.238 (78)			34
fig|1029756.3.peg.239 (237)			102
fig|1029756.3.peg.240 (651)	K01895	ACSS; acetyl-CoA synthetase [EC:6.2.1.1]	728
fig|1029756.3.peg.241 (46)
fig|1029756.3.peg.242 (539)	K02498	hemY; HemY protein	243
fig|1029756.3.peg.243 (572)			14	K01719	1
fig|1029756.3.peg.244 (242)	K01719	hemD; uroporphyrinogen-III synthase [EC:4.2.1.75]	117
fig|1029756.3.peg.245 (283)	K01749	hemC; hydroxymethylbilane synthase [EC:2.5.1.61]	244
fig|1029756.3.peg.246 (37)
fig|1029756.3.peg.247 (370)	K01409	KAE1; N6-L-threonylcarbamoyladenine synthase [EC:2.3.1.234]	288
fig|1029756.3.peg.248 (331)	K00057	gpsA; glycerol-3-phosphate dehydrogenase (NAD(P)+) [EC:1.1.1.94]	257
fig|1029756.3.peg.249 (151)			163
fig|1029756.3.peg.250 (296)			5	K00075	1
fig|1029756.3.peg.251 (213)			162
fig|1029756.3.peg.252 (78)			1	K07054	1
fig|1029756.3.peg.253 (48)
fig|1029756.3.peg.254 (58)			1	K02666	1
fig|1029756.3.peg.255 (56)			1	K06950	1
fig|1029756.3.peg.256 (46)			1
fig|1029756.3.peg.257 (81)			6	K21904	1
fig|1029756.3.peg.258 (292)	K07124	uncharacterized protein	113
fig|1029756.3.peg.259 (148)			9	K11913	1
fig|1029756.3.peg.260 (403)			18	K00613	1
fig|1029756.3.peg.261 (65)			8	K03744	1
fig|1029756.3.peg.262 (1048)			731
fig|1029756.3.peg.263 (274)	K03585	acrA; membrane fusion protein, multidrug efflux system	76
fig|1029756.3.peg.264 (459)			190
fig|1029756.3.peg.265 (194)			72
fig|1029756.3.peg.266 (95)
fig|1029756.3.peg.267 (605)	K03821	phbC; polyhydroxyalkanoate synthase subunit PhaC [EC:2.3.1.-]	546
fig|1029756.3.peg.268 (49)
fig|1029756.3.peg.269 (431)			124
fig|1029756.3.peg.270 (898)	K00372	nasA; assimilatory nitrate reductase catalytic subunit [EC:1.7.99.-]	744
fig|1029756.3.peg.271 (536)	K00380	cysJ; sulfite reductase (NADPH) flavoprotein alpha-component [EC:1.8.1.2]	455
fig|1029756.3.peg.272 (597)	K00366	nirA; ferredoxin-nitrite reductase [EC:1.7.7.1]	768
fig|1029756.3.peg.273 (406)	K00362	nirB; nitrite reductase (NADH) large subunit [EC:1.7.1.15]	319
fig|1029756.3.peg.274 (268)	K15578	nrtC; nitrate/nitrite transport system ATP-binding protein [EC:3.6.3.-]	296
fig|1029756.3.peg.275 (315)	K15577	nrtB; nitrate/nitrite transport system permease protein	305
fig|1029756.3.peg.276 (460)	K15576	nrtA; nitrate/nitrite transport system substrate-binding protein	400
fig|1029756.3.peg.277 (418)	K22067	nasS; two-component system, oxyanion-binding sensor	165	K15576	17
fig|1029756.3.peg.278 (199)	K07183	nasT; two-component system, response regulator / RNA-binding antiterminator	184
fig|1029756.3.peg.279 (640)	K00117	gcd; quinoprotein glucose dehydrogenase [EC:1.1.5.2]	395
fig|1029756.3.peg.280 (130)			8	K00406	3
fig|1029756.3.peg.281 (195)			13	K07685	1
fig|1029756.3.peg.282 (322)	K03644	lipA; lipoyl synthase [EC:2.8.1.8]	312
fig|1029756.3.peg.283 (355)	K17760	qheDH; quinohemoprotein ethanol dehydrogenase [EC:1.1.9.1]	75	K20936	3
fig|1029756.3.peg.284 (348)	K17760	qheDH; quinohemoprotein ethanol dehydrogenase [EC:1.1.9.1]	79
fig|1029756.3.peg.285 (318)	K21416	acoA; acetoin:2,6-dichlorophenolindophenol oxidoreductase subunit alpha [EC:1.1.1.-]	237
fig|1029756.3.peg.286 (350)	K21417	acoB; acetoin:2,6-dichlorophenolindophenol oxidoreductase subunit beta [EC:1.1.1.-]	249
fig|1029756.3.peg.287 (77)			7	K00658	3
fig|1029756.3.peg.288 (236)	K00627	DLAT; pyruvate dehydrogenase E2 component (dihydrolipoamide acetyltransferase) [EC:2.3.1.12]	55
fig|1029756.3.peg.289 (233)			10	K16869	4
fig|1029756.3.peg.290 (615)	K21405	acoR; sigma-54 dependent transcriptional regulator, acetoin dehydrogenase operon transcriptional activator AcoR	178
fig|1029756.3.peg.291 (486)	K00382	DLD; dihydrolipoamide dehydrogenase [EC:1.8.1.4]	431
fig|1029756.3.peg.292 (37)			1
fig|1029756.3.peg.293 (526)			400
fig|1029756.3.peg.294 (164)			51
fig|1029756.3.peg.295 (492)			114
fig|1029756.3.peg.296 (439)			201
fig|1029756.3.peg.297 (46)
fig|1029756.3.peg.298 (245)	K03585	acrA; membrane fusion protein, multidrug efflux system	30
fig|1029756.3.peg.299 (621)			476
fig|1029756.3.peg.300 (226)			231
fig|1029756.3.peg.301 (94)			60
fig|1029756.3.peg.302 (149)			39
fig|1029756.3.peg.303 (211)			136
fig|1029756.3.peg.304 (525)			142
fig|1029756.3.peg.305 (246)			53
fig|1029756.3.peg.306 (76)			8	K03789	1
fig|1029756.3.peg.307 (407)			220
fig|1029756.3.peg.308 (1011)			4	K03695	1
fig|1029756.3.peg.309 (104)			11	K01768	1
fig|1029756.3.peg.310 (275)			25	K09748	1
fig|1029756.3.peg.311 (433)			2	K01879	1
fig|1029756.3.peg.312 (110)			96
fig|1029756.3.peg.313 (701)	K01284	dcp; peptidyl-dipeptidase Dcp [EC:3.4.15.5]	584
fig|1029756.3.peg.314 (205)	K08988	putative membrane protein	107
fig|1029756.3.peg.315 (279)	K06872	uncharacterized protein	70
fig|1029756.3.peg.316 (207)	K03744	lemA; LemA protein	157
fig|1029756.3.peg.317 (178)			6	K02030	1
fig|1029756.3.peg.318 (310)	K03496	parA; chromosome partitioning protein	28
fig|1029756.3.peg.319 (303)	K05838	ybbN; putative thioredoxin	229
fig|1029756.3.peg.320 (225)	K07157	uncharacterized protein	237
fig|1029756.3.peg.321 (78)	K09791	uncharacterized protein	52
fig|1029756.3.peg.322 (45)			1	K05810	1
fig|1029756.3.peg.323 (335)	K22310	olsB; L-ornithine Nalpha-acyltransferase [EC:2.3.2.30]	246
fig|1029756.3.peg.324 (937)	K03555	mutS; DNA mismatch repair protein MutS	668
fig|1029756.3.peg.325 (923)	K00990	glnD; [protein-PII] uridylyltransferase [EC:2.7.7.59]	749
fig|1029756.3.peg.326 (988)	K02335	polA; DNA polymerase I [EC:2.7.7.7]	848
fig|1029756.3.peg.327 (935)			57
fig|1029756.3.peg.328 (43)			1	K07812	0
fig|1029756.3.peg.329 (792)			268
fig|1029756.3.peg.330 (692)	K02014	TC.FEV.OM; iron complex outermembrane recepter protein	129
fig|1029756.3.peg.331 (116)			2	K00087	1
fig|1029756.3.peg.332 (446)			285
fig|1029756.3.peg.333 (126)			10	K22083	1
fig|1029756.3.peg.334 (83)			74
fig|1029756.3.peg.335 (162)	K07104	catE; catechol 2,3-dioxygenase [EC:1.13.11.2]	141
fig|1029756.3.peg.336 (108)	K02902	RP-L28; large subunit ribosomal protein L28	103
fig|1029756.3.peg.337 (282)			85
fig|1029756.3.peg.338 (1070)	K17675	SUPV3L1; ATP-dependent RNA helicase SUPV3L1/SUV3 [EC:3.6.4.13]	940
fig|1029756.3.peg.339 (145)	K04762	hslR; ribosome-associated heat shock protein Hsp15	72
fig|1029756.3.peg.340 (112)	K05524	fdxA; ferredoxin	128
fig|1029756.3.peg.341 (341)	K07736	carD; CarD family transcriptional regulator	116
fig|1029756.3.peg.342 (365)			78
fig|1029756.3.peg.343 (576)			3	K01406	1
fig|1029756.3.peg.344 (147)			11	K15582	1
fig|1029756.3.peg.345 (308)	K22468	ppk2; polyphosphate kinase [EC:2.7.4.1]	210
fig|1029756.3.peg.346 (415)	K07636	phoR; two-component system, OmpR family, phosphate regulon sensor histidine kinase PhoR [EC:2.7.13.3]	184
fig|1029756.3.peg.347 (199)			50	K03631	1
fig|1029756.3.peg.348 (152)	K15977	putative oxidoreductase	102
fig|1029756.3.peg.349 (610)	K00239	sdhA; succinate dehydrogenase / fumarate reductase, flavoprotein subunit [EC:1.3.5.1 1.3.5.4]	695
fig|1029756.3.peg.350 (126)	K00242	sdhD; succinate dehydrogenase / fumarate reductase, membrane anchor subunit	105
fig|1029756.3.peg.351 (141)	K00241	sdhC; succinate dehydrogenase / fumarate reductase, cytochrome b subunit	84
fig|1029756.3.peg.352 (37)
fig|1029756.3.peg.353 (323)	K06955	uncharacterized protein	111
fig|1029756.3.peg.354 (105)
fig|1029756.3.peg.355 (350)	K14449	mch; 2-methylfumaryl-CoA hydratase [EC:4.2.1.148]	365
fig|1029756.3.peg.356 (230)			205
fig|1029756.3.peg.357 (311)	K01644	citE; citrate lyase subunit beta / citryl-CoA lyase [EC:4.1.3.34]	218
fig|1029756.3.peg.358 (310)	K00868	pdxK; pyridoxine kinase [EC:2.7.1.35]	79
fig|1029756.3.peg.359 (528)			251
fig|1029756.3.peg.360 (41)
fig|1029756.3.peg.361 (212)	K01673	cynT; carbonic anhydrase [EC:4.2.1.1]	164
fig|1029756.3.peg.362 (201)	K02199	ccmG; cytochrome c biogenesis protein CcmG, thiol:disulfide interchange protein DsbE	135
fig|1029756.3.peg.363 (60)	K02196	ccmD; heme exporter protein D	19
fig|1029756.3.peg.364 (253)	K02195	ccmC; heme exporter protein C	195
fig|1029756.3.peg.365 (222)	K02194	ccmB; heme exporter protein B	164
fig|1029756.3.peg.366 (218)	K02193	ccmA; heme exporter protein A [EC:3.6.3.41]	120
fig|1029756.3.peg.367 (77)			1
fig|1029756.3.peg.368 (909)	K01681	ACO; aconitate hydratase [EC:4.2.1.3]	1383
fig|1029756.3.peg.369 (260)			111
fig|1029756.3.peg.370 (326)	K00344	qor; NADPH2:quinone reductase [EC:1.6.5.5]	257
fig|1029756.3.peg.371 (193)			157
fig|1029756.3.peg.372 (174)			69
fig|1029756.3.peg.373 (216)			115
fig|1029756.3.peg.374 (363)	K08304	mltA; membrane-bound lytic murein transglycosylase A [EC:4.2.2.-]	193
fig|1029756.3.peg.375 (246)			182
fig|1029756.3.peg.376 (168)	K03071	secB; preprotein translocase subunit SecB	116
fig|1029756.3.peg.377 (241)	K02342	dnaQ; DNA polymerase III subunit epsilon [EC:2.7.7.7]	191
fig|1029756.3.peg.378 (206)	K00859	coaE; dephospho-CoA kinase [EC:2.7.1.24]	143
fig|1029756.3.peg.379 (281)	K00014	aroE; shikimate dehydrogenase [EC:1.1.1.25]	200
fig|1029756.3.peg.380 (196)	K06287	maf; septum formation protein	169
fig|1029756.3.peg.381 (293)	K09773	ppsR; [pyruvate, water dikinase]-phosphate phosphotransferase / [pyruvate, water dikinase] kinase [EC:2.7.4.28 2.7.11.33]	302
fig|1029756.3.peg.382 (354)	K01599	hemE; uroporphyrinogen decarboxylase [EC:4.1.1.37]	393
fig|1029756.3.peg.383 (153)	K08973	putative membrane protein	118
fig|1029756.3.peg.384 (421)	K03628	rho; transcription termination factor Rho	535
fig|1029756.3.peg.385 (305)			159
fig|1029756.3.peg.386 (688)	K06888	uncharacterized protein	488
fig|1029756.3.peg.387 (448)	K03650	mnmE; tRNA modification GTPase [EC:3.6.-.-]	280
fig|1029756.3.peg.388 (40)
fig|1029756.3.peg.389 (187)			6	K02843	1
fig|1029756.3.peg.390 (144)			12	K07090	1
fig|1029756.3.peg.391 (624)	K03495	gidA; tRNA uridine 5-carboxymethylaminomethyl modification enzyme	552
fig|1029756.3.peg.392 (192)	K03501	gidB; 16S rRNA (guanine527-N7)-methyltransferase [EC:2.1.1.170]	102
fig|1029756.3.peg.393 (265)	K03496	parA; chromosome partitioning protein	238
fig|1029756.3.peg.394 (300)	K03497	parB; chromosome partitioning protein, ParB family	210
fig|1029756.3.peg.395 (110)	K01523	hisE; phosphoribosyl-ATP pyrophosphohydrolase [EC:3.6.1.31]	69
fig|1029756.3.peg.396 (337)	K00867	coaA; type I pantothenate kinase [EC:2.7.1.33]	252
fig|1029756.3.peg.397 (106)			13	K00059	1
fig|1029756.3.peg.398 (371)	K00052	leuB; 3-isopropylmalate dehydrogenase [EC:1.1.1.85]	539
fig|1029756.3.peg.399 (41)
fig|1029756.3.peg.400 (197)			59
fig|1029756.3.peg.401 (226)	K01834	PGAM; 2,3-bisphosphoglycerate-dependent phosphoglycerate mutase [EC:5.4.2.11]	212
fig|1029756.3.peg.402 (268)	K00215	dapB; 4-hydroxy-tetrahydrodipicolinate reductase [EC:1.17.1.8]	225
fig|1029756.3.peg.403 (170)			103
fig|1029756.3.peg.404 (150)			35
fig|1029756.3.peg.405 (350)			174
fig|1029756.3.peg.406 (342)	K00133	asd; aspartate-semialdehyde dehydrogenase [EC:1.2.1.11]	387
fig|1029756.3.peg.407 (116)			29	K22489	1
fig|1029756.3.peg.408 (198)	K06190	ispZ; intracellular septation protein	170
fig|1029756.3.peg.409 (201)	K06190	ispZ; intracellular septation protein	64
fig|1029756.3.peg.410 (388)	K03110	ftsY; fused signal recognition particle receptor	258
fig|1029756.3.peg.411 (418)	K18707	mtaB; threonylcarbamoyladenosine tRNA methylthiotransferase MtaB [EC:2.8.4.5]	379
fig|1029756.3.peg.412 (290)	K01778	dapF; diaminopimelate epimerase [EC:5.1.1.7]	251
fig|1029756.3.peg.413 (388)	K21430	yliI; aldose sugar dehydrogenase [EC:1.1.5.-]	205
fig|1029756.3.peg.414 (162)			13	K00616	1
fig|1029756.3.peg.415 (40)			2
fig|1029756.3.peg.416 (520)	K03106	SRP54; signal recognition particle subunit SRP54 [EC:3.6.5.4]	430
fig|1029756.3.peg.417 (129)	K02959	RP-S16; small subunit ribosomal protein S16	74
fig|1029756.3.peg.418 (61)			2
fig|1029756.3.peg.419 (122)			5	K22551	1
fig|1029756.3.peg.420 (193)	K02860	rimM; 16S rRNA processing protein RimM	81
fig|1029756.3.peg.421 (422)	K03185	ubiH; 2-octaprenyl-6-methoxyphenol hydroxylase [EC:1.14.13.-]	250
fig|1029756.3.peg.422 (308)	K10805	tesB; acyl-CoA thioesterase II [EC:3.1.2.-]	336
fig|1029756.3.peg.423 (112)	K04752	glnK; nitrogen regulatory protein P-II 2	112	K04751	18
fig|1029756.3.peg.424 (448)	K03320	amt; ammonium transporter, Amt family	285
fig|1029756.3.peg.425 (190)			142
fig|1029756.3.peg.426 (228)			328
fig|1029756.3.peg.427 (182)			28	K10914	2
fig|1029756.3.peg.428 (308)			88	K03627	1
fig|1029756.3.peg.429 (220)	K06997	yggS; PLP dependent protein	253
fig|1029756.3.peg.430 (387)			198
fig|1029756.3.peg.431 (79)
fig|1029756.3.peg.432 (878)	K01869	LARS; leucyl-tRNA synthetase [EC:6.1.1.4]	886
fig|1029756.3.peg.433 (186)	K03643	lptE; LPS-assembly lipoprotein	76
fig|1029756.3.peg.434 (347)	K02340	holA; DNA polymerase III subunit delta [EC:2.7.7.7]	226
fig|1029756.3.peg.435 (333)			295	K00856	35
fig|1029756.3.peg.436 (182)			5	K02462	1
fig|1029756.3.peg.437 (387)	K01438	argE; acetylornithine deacetylase [EC:3.5.1.16]	237
fig|1029756.3.peg.438 (135)	K06195	apaG; ApaG protein	138
fig|1029756.3.peg.439 (404)	K10764	metZ; O-succinylhomoserine sulfhydrylase [EC:2.5.1.-]	379
fig|1029756.3.peg.440 (372)	K01494	dcd; dCTP deaminase [EC:3.5.4.13]	384
fig|1029756.3.peg.441 (110)			56
fig|1029756.3.peg.442 (256)			103	K15930	4
fig|1029756.3.peg.443 (390)	K01439	dapE; succinyl-diaminopimelate desuccinylase [EC:3.5.1.18]	311
fig|1029756.3.peg.444 (280)	K00674	dapD; 2,3,4,5-tetrahydropyridine-2,6-dicarboxylate N-succinyltransferase [EC:2.3.1.117]	309
fig|1029756.3.peg.445 (218)			79
fig|1029756.3.peg.446 (469)	K01755	argH; argininosuccinate lyase [EC:4.3.2.1]	455
fig|1029756.3.peg.447 (72)			12	K02557	1
fig|1029756.3.peg.448 (424)	K01586	lysA; diaminopimelate decarboxylase [EC:4.1.1.20]	402
fig|1029756.3.peg.449 (899)			349
fig|1029756.3.peg.450 (318)	K12980	lpxQ; lipid A oxidase	20
fig|1029756.3.peg.451 (375)			182
fig|1029756.3.peg.452 (731)	K05367	pbpC; penicillin-binding protein 1C [EC:2.4.1.129]	420
fig|1029756.3.peg.453 (1791)	K06894	uncharacterized protein	1063
fig|1029756.3.peg.454 (37)
fig|1029756.3.peg.455 (197)			11	K03643	1
fig|1029756.3.peg.456 (231)	K07657	phoB; two-component system, OmpR family, phosphate regulon response regulator PhoB	262
fig|1029756.3.peg.457 (274)	K02039	phoU; phosphate transport system protein	193
fig|1029756.3.peg.458 (268)	K02036	pstB; phosphate transport system ATP-binding protein [EC:7.3.2.1]	278
fig|1029756.3.peg.459 (434)	K02038	pstA; phosphate transport system permease protein	368
fig|1029756.3.peg.460 (491)	K02037	pstC; phosphate transport system permease protein	373
fig|1029756.3.peg.461 (351)	K02040	pstS; phosphate transport system substrate-binding protein	293
fig|1029756.3.peg.462 (259)	K00240	sdhB; succinate dehydrogenase / fumarate reductase, iron-sulfur subunit [EC:1.3.5.1 1.3.5.4]	304
fig|1029756.3.peg.463 (97)			6	K21687	1
fig|1029756.3.peg.464 (187)			113
fig|1029756.3.peg.465 (378)	K06916	zapE; cell division protein ZapE	236
fig|1029756.3.peg.466 (321)	K00024	mdh; malate dehydrogenase [EC:1.1.1.37]	359
fig|1029756.3.peg.467 (399)	K01903	sucC; succinyl-CoA synthetase beta subunit [EC:6.2.1.5]	393
fig|1029756.3.peg.468 (299)	K01902	sucD; succinyl-CoA synthetase alpha subunit [EC:6.2.1.5]	333
fig|1029756.3.peg.469 (92)			1	K01992	1
fig|1029756.3.peg.470 (982)	K00164	OGDH; 2-oxoglutarate dehydrogenase E1 component [EC:1.2.4.2]	975
fig|1029756.3.peg.471 (430)	K00658	DLST; 2-oxoglutarate dehydrogenase E2 component (dihydrolipoamide succinyltransferase) [EC:2.3.1.61]	358
fig|1029756.3.peg.472 (467)	K00382	DLD; dihydrolipoamide dehydrogenase [EC:1.8.1.4]	481
fig|1029756.3.peg.473 (352)	K09973	uncharacterized protein	182
fig|1029756.3.peg.474 (320)	K03733	xerC; integrase/recombinase XerC	218
fig|1029756.3.peg.475 (131)	K03530	hupB; DNA-binding protein HU-beta	29	K04764	1
fig|1029756.3.peg.476 (217)	K00616	E2.2.1.2; transaldolase [EC:2.2.1.2]	242
fig|1029756.3.peg.477 (738)	K04066	priA; primosomal protein N' (replication factor Y) (superfamily II helicase) [EC:3.6.4.-]	599
fig|1029756.3.peg.478 (95)			3	K01638	1
fig|1029756.3.peg.479 (122)			9	K00632	1
fig|1029756.3.peg.480 (107)			2	K10439	1
fig|1029756.3.peg.481 (186)	K02113	ATPF1D; F-type H+-transporting ATPase subunit delta	169
fig|1029756.3.peg.482 (43)
fig|1029756.3.peg.483 (509)	K02111	ATPF1A; F-type H+-transporting ATPase subunit alpha [EC:7.1.2.2]	852
fig|1029756.3.peg.484 (295)	K02115	ATPF1G; F-type H+-transporting ATPase subunit gamma	272
fig|1029756.3.peg.485 (140)
fig|1029756.3.peg.486 (133)			168
fig|1029756.3.peg.487 (477)	K02112	ATPF1B; F-type H+-transporting ATPase subunit beta [EC:7.1.2.2]	581
fig|1029756.3.peg.488 (102)			32	K00554	1
fig|1029756.3.peg.489 (129)	K02114	ATPF1E; F-type H+-transporting ATPase subunit epsilon	72
fig|1029756.3.peg.490 (178)			9	K01061	1
fig|1029756.3.peg.491 (174)	K08311	nudH; putative (di)nucleoside polyphosphate hydrolase [EC:3.6.1.-]	152
fig|1029756.3.peg.492 (169)	K08311	nudH; putative (di)nucleoside polyphosphate hydrolase [EC:3.6.1.-]	159
fig|1029756.3.peg.493 (473)	K03797	E3.4.21.102; carboxyl-terminal processing protease [EC:3.4.21.102]	379
fig|1029756.3.peg.494 (498)			177
fig|1029756.3.peg.495 (64)			26
fig|1029756.3.peg.496 (192)	K00798	MMAB; cob(I)alamin adenosyltransferase [EC:2.5.1.17]	265
fig|1029756.3.peg.497 (232)			161
fig|1029756.3.peg.498 (251)	K03521	fixA; electron transfer flavoprotein beta subunit	347
fig|1029756.3.peg.499 (314)	K03522	fixB; electron transfer flavoprotein alpha subunit	304
fig|1029756.3.peg.500 (309)	K00074	paaH; 3-hydroxybutyryl-CoA dehydrogenase [EC:1.1.1.157]	292
fig|1029756.3.peg.501 (253)			181
fig|1029756.3.peg.502 (126)			1	K07220	1
fig|1029756.3.peg.503 (89)			11	K03560	1
fig|1029756.3.peg.504 (454)			222
fig|1029756.3.peg.505 (221)			247
fig|1029756.3.peg.506 (105)			30
fig|1029756.3.peg.507 (89)			26
fig|1029756.3.peg.508 (101)			73
fig|1029756.3.peg.509 (534)	K00058	serA; D-3-phosphoglycerate dehydrogenase / 2-oxoglutarate reductase [EC:1.1.1.95 1.1.1.399]	333
fig|1029756.3.peg.510 (399)	K00831	serC; phosphoserine aminotransferase [EC:2.6.1.52]	471
fig|1029756.3.peg.511 (308)			45	K02197	1
fig|1029756.3.peg.512 (191)			2	K17722	1
fig|1029756.3.peg.513 (254)			8	K03532	1
fig|1029756.3.peg.514 (192)
fig|1029756.3.peg.515 (303)	K02574	napH; ferredoxin-type protein NapH	218
fig|1029756.3.peg.516 (261)	K02573	napG; ferredoxin-type protein NapG	143
fig|1029756.3.peg.517 (224)	K02483	two-component system	157
fig|1029756.3.peg.518 (466)			84
fig|1029756.3.peg.519 (282)			12	K06196	7
fig|1029756.3.peg.520 (410)	K15229	mauB; methylamine dehydrogenase heavy chain [EC:1.4.9.1]	278
fig|1029756.3.peg.521 (183)			53
fig|1029756.3.peg.522 (210)			111
fig|1029756.3.peg.523 (183)	K15228	mauA; methylamine dehydrogenase light chain [EC:1.4.9.1]	179
fig|1029756.3.peg.524 (123)			17	K02638	4
fig|1029756.3.peg.525 (274)			11	K00826	1
fig|1029756.3.peg.526 (360)	K00428	E1.11.1.5; cytochrome c peroxidase [EC:1.11.1.5]	144
fig|1029756.3.peg.527 (95)			11	K01990	1
fig|1029756.3.peg.528 (69)	K03116	tatA; sec-independent protein translocase protein TatA	30
fig|1029756.3.peg.529 (98)			11	K00812	1
fig|1029756.3.peg.530 (136)			48	K01997	1
fig|1029756.3.peg.531 (60)			25	K03688	1
fig|1029756.3.peg.532 (462)	K16238	eat; ethanolamine permease	524
fig|1029756.3.peg.533 (231)			17	K15783	1
fig|1029756.3.peg.534 (96)			13	K03100	1
fig|1029756.3.peg.535 (735)	K16087	TC.FEV.OM3; hemoglobin/transferrin/lactoferrin receptor protein	224
fig|1029756.3.peg.536 (125)			3	K09773	1
fig|1029756.3.peg.537 (223)			76
fig|1029756.3.peg.538 (130)	K07227	chuX; heme iron utilization protein	75	K21936	1
fig|1029756.3.peg.539 (418)	K21936	chuW; anaerobilin synthase [EC:2.1.1.342]	189
fig|1029756.3.peg.540 (414)			27	K13005	1
fig|1029756.3.peg.541 (381)	K13010	per; perosamine synthetase [EC:2.6.1.102]	261
fig|1029756.3.peg.542 (258)			90
fig|1029756.3.peg.543 (178)			10	K03825	2
fig|1029756.3.peg.544 (242)			119
fig|1029756.3.peg.545 (286)			109
fig|1029756.3.peg.546 (387)			28	K05946	1
fig|1029756.3.peg.547 (506)			285
fig|1029756.3.peg.548 (494)			300
fig|1029756.3.peg.549 (114)	K02914	RP-L34; large subunit ribosomal protein L34	10
fig|1029756.3.peg.550 (130)	K03536	rnpA; ribonuclease P protein component [EC:3.1.26.5]	65
fig|1029756.3.peg.551 (53)
fig|1029756.3.peg.552 (621)	K03217	yidC; YidC/Oxa1 family membrane protein insertase	456
fig|1029756.3.peg.553 (215)	K03978	engB; GTP-binding protein	158
fig|1029756.3.peg.554 (173)			99	K03649	9
fig|1029756.3.peg.555 (563)
fig|1029756.3.peg.556 (81)
fig|1029756.3.peg.557 (318)	K00930	argB; acetylglutamate kinase [EC:2.7.2.8]	335
fig|1029756.3.peg.558 (261)	K07025	putative hydrolase of the HAD superfamily	140
fig|1029756.3.peg.559 (162)			4	K10563	1
fig|1029756.3.peg.560 (154)	K02339	holC; DNA polymerase III subunit chi [EC:2.7.7.7]	170
fig|1029756.3.peg.561 (50)
fig|1029756.3.peg.562 (99)			12	K09761	1
fig|1029756.3.peg.563 (455)	K03977	engA; GTPase	363
fig|1029756.3.peg.564 (487)			202
fig|1029756.3.peg.565 (255)			61
fig|1029756.3.peg.566 (296)	K00606	panB; 3-methyl-2-oxobutanoate hydroxymethyltransferase [EC:2.1.2.11]	332
fig|1029756.3.peg.567 (66)
fig|1029756.3.peg.568 (509)			11
fig|1029756.3.peg.569 (194)			122
fig|1029756.3.peg.570 (142)
fig|1029756.3.peg.571 (348)	K03639	moaA; GTP 3',8-cyclase [EC:4.1.99.22]	351
fig|1029756.3.peg.572 (566)			442
fig|1029756.3.peg.573 (239)			3	K01493	1
fig|1029756.3.peg.574 (423)
fig|1029756.3.peg.575 (107)			1	K02003	1
fig|1029756.3.peg.576 (373)			351
fig|1029756.3.peg.577 (120)			81
fig|1029756.3.peg.578 (185)	K00760	hprT; hypoxanthine phosphoribosyltransferase [EC:2.4.2.8]	129
fig|1029756.3.peg.579 (218)	K09812	ftsE; cell division transport system ATP-binding protein	217
fig|1029756.3.peg.580 (390)	K09811	ftsX; cell division transport system permease protein	109
fig|1029756.3.peg.581 (213)			102
fig|1029756.3.peg.582 (243)	K00655	plsC; 1-acyl-sn-glycerol-3-phosphate acyltransferase [EC:2.3.1.51]	231
fig|1029756.3.peg.583 (287)			143
fig|1029756.3.peg.584 (41)
fig|1029756.3.peg.585 (806)	K00525	E1.17.4.1A; ribonucleoside-diphosphate reductase alpha chain [EC:1.17.4.1]	706
fig|1029756.3.peg.586 (143)			27
fig|1029756.3.peg.587 (126)	K06199	crcB; fluoride exporter	77
fig|1029756.3.peg.588 (228)	K07232	CHAC; glutathione-specific gamma-glutamylcyclotransferase [EC:4.3.2.7]	121
fig|1029756.3.peg.589 (318)	K00220	tyrC; cyclohexadieny/prephenate dehydrogenase [EC:1.3.1.43 1.3.1.12]	278
fig|1029756.3.peg.590 (366)	K00817	hisC; histidinol-phosphate aminotransferase [EC:2.6.1.9]	330
fig|1029756.3.peg.591 (60)
fig|1029756.3.peg.592 (417)			2	K01814	1
fig|1029756.3.peg.593 (82)			4
fig|1029756.3.peg.594 (101)			10	K02470	1
fig|1029756.3.peg.595 (407)	K00641	metX; homoserine O-acetyltransferase/O-succinyltransferase [EC:2.3.1.31 2.3.1.46]	402
fig|1029756.3.peg.596 (211)			172
fig|1029756.3.peg.597 (277)			80
fig|1029756.3.peg.598 (237)			160
fig|1029756.3.peg.599 (266)	K01069	gloB; hydroxyacylglutathione hydrolase [EC:3.1.2.6]	232
fig|1029756.3.peg.600 (139)	K09705	uncharacterized protein	164
fig|1029756.3.peg.601 (675)			58
fig|1029756.3.peg.602 (242)	K00023	phbB; acetoacetyl-CoA reductase [EC:1.1.1.36]	247
fig|1029756.3.peg.603 (396)	K00626	E2.3.1.9; acetyl-CoA C-acetyltransferase [EC:2.3.1.9]	435
fig|1029756.3.peg.604 (207)			138
fig|1029756.3.peg.605 (523)			224
fig|1029756.3.peg.606 (147)			54
fig|1029756.3.peg.607 (51)	K02911	RP-L32; large subunit ribosomal protein L32	65
fig|1029756.3.peg.608 (491)	K03814	mtgA; monofunctional glycosyltransferase [EC:2.4.1.129]	42
fig|1029756.3.peg.609 (71)			2	K00799	1
fig|1029756.3.peg.610 (232)	K00795	ispA; farnesyl diphosphate synthase [EC:2.5.1.1 2.5.1.10]	172
fig|1029756.3.peg.611 (67)
fig|1029756.3.peg.612 (66)			7	K00158	1
fig|1029756.3.peg.613 (401)	K03526	gcpE; (E)-4-hydroxy-3-methylbut-2-enyl-diphosphate synthase [EC:1.17.7.1 1.17.7.3]	545
fig|1029756.3.peg.614 (171)			54	K01673	6
fig|1029756.3.peg.615 (264)	K09816	znuB; zinc transport system permease protein	164
fig|1029756.3.peg.616 (305)	K09817	znuC; zinc transport system ATP-binding protein [EC:3.6.3.-]	133
fig|1029756.3.peg.617 (170)	K09823	zur; Fur family transcriptional regulator, zinc uptake regulator	67
fig|1029756.3.peg.618 (1090)			29	K03546	1
fig|1029756.3.peg.619 (457)	K07114	yfbK; Ca-activated chloride channel homolog	140
fig|1029756.3.peg.620 (919)			94	K12685	12
fig|1029756.3.peg.621 (212)	K02520	infC; translation initiation factor IF-3	139
fig|1029756.3.peg.622 (375)			175
fig|1029756.3.peg.623 (262)			164
fig|1029756.3.peg.624 (458)			171
fig|1029756.3.peg.625 (444)			128
fig|1029756.3.peg.626 (508)			262
fig|1029756.3.peg.627 (452)			3	K03646	3
fig|1029756.3.peg.628 (290)			192
fig|1029756.3.peg.629 (395)	K18979	queG; epoxyqueuosine reductase [EC:1.17.99.6]	295
fig|1029756.3.peg.630 (231)	K00799	GST; glutathione S-transferase [EC:2.5.1.18]	164
fig|1029756.3.peg.631 (266)	K06153	bacA; undecaprenyl-diphosphatase [EC:3.6.1.27]	216
fig|1029756.3.peg.632 (154)	K02806	PTS-Ntr-EIIA; PTS system, nitrogen regulatory IIA component [EC:2.7.1.-]	169
fig|1029756.3.peg.633 (511)	K03092	rpoN; RNA polymerase sigma-54 factor	404
fig|1029756.3.peg.634 (287)	K06861	lptB; lipopolysaccharide export system ATP-binding protein [EC:3.6.3.-]	210
fig|1029756.3.peg.635 (668)			6	K09774	3
fig|1029756.3.peg.636 (206)	K03684	rnd; ribonuclease D [EC:3.1.13.5]	254
fig|1029756.3.peg.637 (591)	K05565	mnhA; multicomponent Na+:H+ antiporter subunit A	165
fig|1029756.3.peg.638 (165)	K05565	mnhA; multicomponent Na+:H+ antiporter subunit A	11	K05559	1
fig|1029756.3.peg.639 (132)	K05566	mnhB; multicomponent Na+:H+ antiporter subunit B	71
fig|1029756.3.peg.640 (127)	K05567	mnhC; multicomponent Na+:H+ antiporter subunit C	79
fig|1029756.3.peg.641 (516)	K05568	mnhD; multicomponent Na+:H+ antiporter subunit D	342
fig|1029756.3.peg.642 (109)	K05569	mnhE; multicomponent Na+:H+ antiporter subunit E	60
fig|1029756.3.peg.643 (101)	K05570	mnhF; multicomponent Na+:H+ antiporter subunit F	37	K05563	2
fig|1029756.3.peg.644 (126)	K05571	mnhG; multicomponent Na+:H+ antiporter subunit G	57
fig|1029756.3.peg.645 (418)			211	K00652	18
fig|1029756.3.peg.646 (282)			110
fig|1029756.3.peg.647 (327)	K00329	E7.1.1.2; NADH dehydrogenase [EC:7.1.1.2]	254
	K00356	E1.6.99.3; NADH dehydrogenase [EC:1.6.99.3]
fig|1029756.3.peg.648 (220)			14	K12600	1
fig|1029756.3.peg.649 (425)	K13038	coaBC; phosphopantothenoylcysteine decarboxylase / phosphopantothenate---cysteine ligase [EC:4.1.1.36 6.3.2.5]	318
fig|1029756.3.peg.650 (195)	K01520	dut; dUTP pyrophosphatase [EC:3.6.1.23]	119
fig|1029756.3.peg.651 (332)	K01738	cysK; cysteine synthase [EC:2.5.1.47]	272
fig|1029756.3.peg.652 (475)	K07126	uncharacterized protein	24
fig|1029756.3.peg.653 (381)	K00830	AGXT; alanine-glyoxylate transaminase / serine-glyoxylate transaminase / serine-pyruvate transaminase [EC:2.6.1.44 2.6.1.45 2.6.1.51]	332
fig|1029756.3.peg.654 (51)			1	K03650	1
fig|1029756.3.peg.655 (265)	K00568	ubiG; 2-polyprenyl-6-hydroxyphenyl methylase / 3-demethylubiquinone-9 3-methyltransferase [EC:2.1.1.222 2.1.1.64]	180
fig|1029756.3.peg.656 (420)	K00928	lysC; aspartate kinase [EC:2.7.2.4]	405
fig|1029756.3.peg.657 (753)	K08484	PTS-EI.PTSP; phosphotransferase system, enzyme I, PtsP [EC:2.7.3.9]	591
fig|1029756.3.peg.658 (361)	K02835	prfA; peptide chain release factor 1	347
fig|1029756.3.peg.659 (299)	K02493	hemK; release factor glutamine methyltransferase [EC:2.1.1.297]	134
fig|1029756.3.peg.660 (272)			32
fig|1029756.3.peg.661 (251)	K07140	uncharacterized protein	224
fig|1029756.3.peg.662 (61)			1	K02687	1
fig|1029756.3.peg.663 (877)	K03695	clpB; ATP-dependent Clp protease ATP-binding subunit ClpB	931
fig|1029756.3.peg.664 (682)			271
fig|1029756.3.peg.665 (254)			190
fig|1029756.3.peg.666 (220)	K07304	msrA; peptide-methionine (S)-S-oxide reductase [EC:1.8.4.11]	211
fig|1029756.3.peg.667 (75)			9	K07733	1
fig|1029756.3.peg.668 (627)			380	K00114	36
fig|1029756.3.peg.669 (608)			122
fig|1029756.3.peg.670 (215)
fig|1029756.3.peg.671 (422)			211
fig|1029756.3.peg.672 (324)			245
fig|1029756.3.peg.673 (534)			174	K20327	17
fig|1029756.3.peg.674 (290)	K02030	ABC.PA.S; polar amino acid transport system substrate-binding protein	138
fig|1029756.3.peg.675 (264)			229
fig|1029756.3.peg.676 (353)			246
fig|1029756.3.peg.677 (192)			16	K04763	1
fig|1029756.3.peg.678 (123)			83
fig|1029756.3.peg.679 (93)	K02518	infA; translation initiation factor IF-1	65
fig|1029756.3.peg.680 (68)	K03704	cspA; cold shock protein (beta-ribbon, CspA family)	69
fig|1029756.3.peg.681 (41)
fig|1029756.3.peg.682 (66)	K02916	RP-L35; large subunit ribosomal protein L35	95
fig|1029756.3.peg.683 (124)	K02887	RP-L20; large subunit ribosomal protein L20	142
fig|1029756.3.peg.684 (357)	K01889	FARSA; phenylalanyl-tRNA synthetase alpha chain [EC:6.1.1.20]	360
fig|1029756.3.peg.685 (811)	K01890	FARSB; phenylalanyl-tRNA synthetase beta chain [EC:6.1.1.20]	672
fig|1029756.3.peg.686 (459)	K03885	ndh; NADH dehydrogenase [EC:1.6.99.3]	336
fig|1029756.3.peg.687 (92)			2	K08744	1
fig|1029756.3.peg.688 (460)			52	K03205	1
fig|1029756.3.peg.689 (497)			181
fig|1029756.3.peg.690 (316)	K22737	mbfA; erythrin-vacuolar iron transport family protein	225
fig|1029756.3.peg.691 (601)	K03596	lepA; GTP-binding protein LepA	700
fig|1029756.3.peg.692 (148)			3	K06893	2
fig|1029756.3.peg.693 (425)			283
fig|1029756.3.peg.694 (91)			5	K10211	1
fig|1029756.3.peg.695 (90)			7	K01816	1
fig|1029756.3.peg.696 (131)			74
fig|1029756.3.peg.697 (755)	K17686	copA; Cu+-exporting ATPase [EC:3.6.3.54]	723
fig|1029756.3.peg.698 (41)
fig|1029756.3.peg.699 (97)	K21600	csoR; CsoR family transcriptional regulator, copper-sensing transcriptional repressor	104
fig|1029756.3.peg.700 (160)			109
fig|1029756.3.peg.701 (86)			10	K18955	1
fig|1029756.3.peg.702 (245)			80
fig|1029756.3.peg.703 (186)			41	K01802	1
fig|1029756.3.peg.704 (951)	K21449	ata; trimeric autotransporter adhesin	42
fig|1029756.3.peg.705 (60)
fig|1029756.3.peg.706 (330)			155
fig|1029756.3.peg.707 (392)	K10778	ada; AraC family transcriptional regulator, regulatory protein of adaptative response / methylated-DNA-[protein]-cysteine methyltransferase [EC:2.1.1.63]	195
fig|1029756.3.peg.708 (1023)			24	K19231	12
fig|1029756.3.peg.709 (40)			2
fig|1029756.3.peg.710 (38)			2
fig|1029756.3.peg.711 (37)
fig|1029756.3.peg.712 (428)			76
fig|1029756.3.peg.713 (62)			1	K00567	1
fig|1029756.3.peg.714 (65)	K07733	alpA; prophage regulatory protein	14
fig|1029756.3.peg.715 (95)
fig|1029756.3.peg.716 (157)
fig|1029756.3.peg.717 (325)			32
fig|1029756.3.peg.718 (75)			15	K02399	1
fig|1029756.3.peg.719 (451)	K07154	hipA; serine/threonine-protein kinase HipA [EC:2.7.11.1]	161
fig|1029756.3.peg.720 (103)			19
fig|1029756.3.peg.721 (38)
fig|1029756.3.peg.722 (222)	K03496	parA; chromosome partitioning protein	55
fig|1029756.3.peg.723 (55)			6	K02356	1
fig|1029756.3.peg.724 (58)			4	K07303	1
fig|1029756.3.peg.725 (816)			300
fig|1029756.3.peg.726 (98)			5	K00783	1
fig|1029756.3.peg.727 (168)			1	K00845	1
fig|1029756.3.peg.728 (151)			66
fig|1029756.3.peg.729 (59)			3	K03832	1
fig|1029756.3.peg.730 (391)			347
fig|1029756.3.peg.731 (119)			8	K01924	1
fig|1029756.3.peg.732 (41)			5	K16077	0
fig|1029756.3.peg.733 (145)			68
fig|1029756.3.peg.734 (307)			271
fig|1029756.3.peg.735 (38)
fig|1029756.3.peg.736 (410)	K15629	CYP152A; fatty-acid peroxygenase [EC:1.11.2.4]	288
fig|1029756.3.peg.737 (412)			21
fig|1029756.3.peg.738 (314)			122
fig|1029756.3.peg.739 (179)			106
fig|1029756.3.peg.740 (41)
fig|1029756.3.peg.741 (401)	K03497	parB; chromosome partitioning protein, ParB family	105
fig|1029756.3.peg.742 (179)
fig|1029756.3.peg.743 (67)			6	K04763	2
fig|1029756.3.peg.744 (452)			5	K21449	1
fig|1029756.3.peg.745 (40)
fig|1029756.3.peg.746 (72)			11	K01952	1
fig|1029756.3.peg.747 (55)
fig|1029756.3.peg.748 (60)			2	K01087	1
fig|1029756.3.peg.749 (210)			13	K03427	1
fig|1029756.3.peg.750 (64)			1	K06076	1
fig|1029756.3.peg.751 (190)			1	K20345	1
fig|1029756.3.peg.752 (468)	K03205	virD4; type IV secretion system protein VirD4	138
fig|1029756.3.peg.753 (140)			8	K07645	1
fig|1029756.3.peg.754 (434)			6	K01154	1
fig|1029756.3.peg.755 (127)			2	K03823	1
fig|1029756.3.peg.756 (96)	K02221	yggT; YggT family protein	85
fig|1029756.3.peg.757 (41)
fig|1029756.3.peg.758 (60)	K09131	uncharacterized protein	19
fig|1029756.3.peg.759 (291)	K01491	folD; methylenetetrahydrofolate dehydrogenase (NADP+) / methenyltetrahydrofolate cyclohydrolase [EC:1.5.1.5 3.5.4.9]	274
fig|1029756.3.peg.760 (380)			29	K06941	1
fig|1029756.3.peg.761 (62)			1	K02182	1
fig|1029756.3.peg.762 (510)	K07391	comM; magnesium chelatase family protein	466
fig|1029756.3.peg.763 (182)			31	K07337	1
fig|1029756.3.peg.764 (144)			13	K07012	1
fig|1029756.3.peg.765 (317)	K01920	gshB; glutathione synthase [EC:6.3.2.3]	304
fig|1029756.3.peg.766 (146)			3	K05396	1
fig|1029756.3.peg.767 (219)	K07006	uncharacterized protein	102
fig|1029756.3.peg.768 (111)			10	K00376	1
fig|1029756.3.peg.769 (178)			30	K16260	3
fig|1029756.3.peg.770 (94)	K07460	yraN; putative endonuclease	40
fig|1029756.3.peg.771 (306)	K07056	rsmI; 16S rRNA (cytidine1402-2'-O)-methyltransferase [EC:2.1.1.198]	238
fig|1029756.3.peg.772 (349)			157
fig|1029756.3.peg.773 (185)
fig|1029756.3.peg.774 (519)	K09974	uncharacterized protein	112
fig|1029756.3.peg.775 (329)	K01894	gluQ; glutamyl-Q tRNA(Asp) synthetase [EC:6.1.1.-]	164
fig|1029756.3.peg.776 (204)	K01247	alkA; DNA-3-methyladenine glycosylase II [EC:3.2.2.21]	106
fig|1029756.3.peg.777 (186)			208
fig|1029756.3.peg.778 (74)			10	K02031	1
fig|1029756.3.peg.779 (55)			3	K01729	1
fig|1029756.3.peg.780 (172)			107
fig|1029756.3.peg.781 (194)			157
fig|1029756.3.peg.782 (376)			224
fig|1029756.3.peg.783 (57)
fig|1029756.3.peg.784 (292)	K02428	rdgB; XTP/dITP diphosphohydrolase [EC:3.6.1.66]	111
fig|1029756.3.peg.785 (136)			108
fig|1029756.3.peg.786 (237)	K00989	rph; ribonuclease PH [EC:2.7.7.56]	375
fig|1029756.3.peg.787 (352)	K03705	hrcA; heat-inducible transcriptional repressor	336
fig|1029756.3.peg.788 (228)	K03687	GRPE; molecular chaperone GrpE	86
fig|1029756.3.peg.789 (639)	K04043	dnaK; molecular chaperone DnaK	704
fig|1029756.3.peg.790 (382)	K03686	dnaJ; molecular chaperone DnaJ	377
fig|1029756.3.peg.791 (196)			173
fig|1029756.3.peg.792 (258)	K16079	omp31; outer membrane immunogenic protein	54
fig|1029756.3.peg.793 (245)	K01591	pyrF; orotidine-5'-phosphate decarboxylase [EC:4.1.1.23]	188
fig|1029756.3.peg.794 (95)			64
fig|1029756.3.peg.795 (52)			1	K01802	1
fig|1029756.3.peg.796 (226)	K00554	trmD; tRNA (guanine37-N1)-methyltransferase [EC:2.1.1.228]	283
fig|1029756.3.peg.797 (151)			4	K03734	1
fig|1029756.3.peg.798 (157)			4	K06189	1
fig|1029756.3.peg.799 (259)	K21603	ftcR; two-component system, OmpR family, flagellar system response regulator FtcR	152
fig|1029756.3.peg.800 (228)	K02390	flgE; flagellar hook protein FlgE	74
fig|1029756.3.peg.801 (176)	K02390	flgE; flagellar hook protein FlgE	39
fig|1029756.3.peg.802 (488)	K02396	flgK; flagellar hook-associated protein 1 FlgK	302
fig|1029756.3.peg.803 (339)	K02397	flgL; flagellar hook-associated protein 3 FlgL	154
fig|1029756.3.peg.804 (115)	K06602	flaF; flagellar protein FlaF	111
fig|1029756.3.peg.805 (142)	K06601	flbT; flagellar protein FlbT	92
fig|1029756.3.peg.806 (143)	K02389	flgD; flagellar basal-body rod modification protein FlgD	66
fig|1029756.3.peg.807 (88)	K02420	fliQ; flagellar biosynthetic protein FliQ	93
fig|1029756.3.peg.808 (695)	K02400	flhA; flagellar biosynthesis protein FlhA	850
fig|1029756.3.peg.809 (252)	K02421	fliR; flagellar biosynthetic protein FliR	175
fig|1029756.3.peg.810 (135)			12	K01684	1
fig|1029756.3.peg.811 (117)			14	K02395	2
fig|1029756.3.peg.812 (153)			22	K04074	1
fig|1029756.3.peg.813 (149)			87
fig|1029756.3.peg.814 (473)	K02412	fliI; flagellum-specific ATP synthase [EC:7.1.2.2]	342
fig|1029756.3.peg.815 (241)	K02391	flgF; flagellar basal-body rod protein FlgF	192
fig|1029756.3.peg.816 (235)			153
fig|1029756.3.peg.817 (290)	K02556	motA; chemotaxis protein MotA	365
fig|1029756.3.peg.818 (114)	K02417	fliNY; flagellar motor switch protein FliN/FliY	61
fig|1029756.3.peg.819 (360)	K02401	flhB; flagellar biosynthetic protein FlhB	290
fig|1029756.3.peg.820 (161)			91
fig|1029756.3.peg.821 (91)			113
fig|1029756.3.peg.822 (211)	K05595	marC; multiple antibiotic resistance protein	130
fig|1029756.3.peg.823 (126)	K02387	flgB; flagellar basal-body rod protein FlgB	99
fig|1029756.3.peg.824 (139)	K02388	flgC; flagellar basal-body rod protein FlgC	133
fig|1029756.3.peg.825 (113)	K02408	fliE; flagellar hook-basal body complex protein FliE	38
fig|1029756.3.peg.826 (262)	K02392	flgG; flagellar basal-body rod protein FlgG	255
fig|1029756.3.peg.827 (181)	K02386	flgA; flagella basal body P-ring formation protein FlgA	57
fig|1029756.3.peg.828 (370)	K02394	flgI; flagellar P-ring protein precursor FlgI	298
fig|1029756.3.peg.829 (344)			10	K05802	1
fig|1029756.3.peg.830 (258)	K02393	flgH; flagellar L-ring protein precursor FlgH	137
fig|1029756.3.peg.831 (165)	K02415	fliL; flagellar FliL protein	70
fig|1029756.3.peg.832 (245)	K02419	fliP; flagellar biosynthetic protein FliP	309
fig|1029756.3.peg.833 (308)	K02406	fliC; flagellin	199
fig|1029756.3.peg.834 (311)	K02406	fliC; flagellin	191
fig|1029756.3.peg.835 (319)	K02406	fliC; flagellin	199
fig|1029756.3.peg.836 (559)	K02409	fliF; flagellar M-ring protein FliF	364
fig|1029756.3.peg.837 (229)			21	K01940	1
fig|1029756.3.peg.838 (384)	K02557	motB; chemotaxis protein MotB	239
fig|1029756.3.peg.839 (406)	K10564	motC; chemotaxis protein MotC	67
fig|1029756.3.peg.840 (495)
fig|1029756.3.peg.841 (74)			9	K03406	1
fig|1029756.3.peg.842 (86)			1	K00459	1
fig|1029756.3.peg.843 (264)
fig|1029756.3.peg.844 (309)	K00575	cheR; chemotaxis protein methyltransferase CheR [EC:2.1.1.80]	183
fig|1029756.3.peg.845 (116)	K03413	cheY; two-component system, chemotaxis family, chemotaxis protein CheY	138
fig|1029756.3.peg.846 (157)	K03408	cheW; purine-binding chemotaxis protein CheW	89
fig|1029756.3.peg.847 (880)	K03407	cheA; two-component system, chemotaxis family, sensor kinase CheA [EC:2.7.13.3]	435
fig|1029756.3.peg.848 (187)			32	K06873	1
fig|1029756.3.peg.849 (321)	K02416	fliM; flagellar motor switch protein FliM	200
fig|1029756.3.peg.850 (328)	K02410	fliG; flagellar motor switch protein FliG	197
fig|1029756.3.peg.851 (199)			132
fig|1029756.3.peg.852 (458)			161
fig|1029756.3.peg.853 (225)	K02483	two-component system	162
fig|1029756.3.peg.854 (170)			18	K00616	1
fig|1029756.3.peg.855 (90)			12	K00973	1
fig|1029756.3.peg.856 (369)			174
fig|1029756.3.peg.857 (527)	K06946	uncharacterized protein	162
fig|1029756.3.peg.858 (427)			141
fig|1029756.3.peg.859 (137)	K08738	CYC; cytochrome c	39
fig|1029756.3.peg.860 (614)			267
fig|1029756.3.peg.861 (68)			24	K01892	1
fig|1029756.3.peg.862 (167)			158
fig|1029756.3.peg.863 (330)			255
fig|1029756.3.peg.864 (131)			15
fig|1029756.3.peg.865 (90)			2	K01783	1
fig|1029756.3.peg.866 (551)			146
fig|1029756.3.peg.867 (359)			117
fig|1029756.3.peg.868 (1040)			642	K03296	131
fig|1029756.3.peg.869 (315)			126
fig|1029756.3.peg.870 (350)	K02012	afuA; iron(III) transport system substrate-binding protein	296
fig|1029756.3.peg.871 (784)	K16090	fiu; catecholate siderophore receptor	231
fig|1029756.3.peg.872 (226)	K07336	PKHD-type hydroxylase [EC:1.14.11.-]	224
fig|1029756.3.peg.873 (370)	K16422	hmo; 4-hydroxymandelate oxidase [EC:1.1.3.46]	241
fig|1029756.3.peg.874 (284)	K03832	tonB; periplasmic protein TonB	62
fig|1029756.3.peg.875 (158)	K03559	exbD; biopolymer transport protein ExbD	144
fig|1029756.3.peg.876 (386)	K03561	exbB; biopolymer transport protein ExbB	116
fig|1029756.3.peg.877 (137)			3	K13051	1
fig|1029756.3.peg.878 (248)	K07126	uncharacterized protein	41
fig|1029756.3.peg.879 (1094)			195
fig|1029756.3.peg.880 (183)	K01790	rfbC; dTDP-4-dehydrorhamnose 3,5-epimerase [EC:5.1.3.13]	119
fig|1029756.3.peg.881 (367)	K01709	rfbG; CDP-glucose 4,6-dehydratase [EC:4.2.1.45]	193
fig|1029756.3.peg.882 (257)	K00978	rfbF; glucose-1-phosphate cytidylyltransferase [EC:2.7.7.33]	202
fig|1029756.3.peg.883 (103)			1	K02031/K02032	1
fig|1029756.3.peg.884 (474)			373
fig|1029756.3.peg.885 (601)	K11747	kefB; glutathione-regulated potassium-efflux system protein KefB	446
fig|1029756.3.peg.886 (307)	K22468	ppk2; polyphosphate kinase [EC:2.7.4.1]	350
fig|1029756.3.peg.887 (114)	K05524	fdxA; ferredoxin	103
fig|1029756.3.peg.888 (167)			28	K08738	1
fig|1029756.3.peg.889 (48)
fig|1029756.3.peg.890 (133)			76
fig|1029756.3.peg.891 (41)
fig|1029756.3.peg.892 (94)			3
fig|1029756.3.peg.893 (146)			51
fig|1029756.3.peg.894 (320)			16	K01698	1
fig|1029756.3.peg.895 (41)			1
fig|1029756.3.peg.896 (576)	K16554	exoP; polysaccharide biosynthesis transport protein	13
fig|1029756.3.peg.897 (288)			17	K16556	14
fig|1029756.3.peg.898 (40)
fig|1029756.3.peg.899 (306)			26
fig|1029756.3.peg.900 (457)			125
fig|1029756.3.peg.901 (411)
fig|1029756.3.peg.902 (59)			1	K01951	1
fig|1029756.3.peg.903 (439)			169	K03606	50
fig|1029756.3.peg.904 (401)			180
fig|1029756.3.peg.905 (558)			9	K07001	1
fig|1029756.3.peg.906 (213)			39	K01838	5
fig|1029756.3.peg.907 (308)			3	K00525	1
fig|1029756.3.peg.908 (329)			6	K00973	3
fig|1029756.3.peg.909 (186)			38
fig|1029756.3.peg.910 (939)
fig|1029756.3.peg.911 (466)			11	K18814	1
fig|1029756.3.peg.912 (377)			105
fig|1029756.3.peg.913 (1520)			865
fig|1029756.3.peg.914 (222)			77
fig|1029756.3.peg.915 (2163)			1397
fig|1029756.3.peg.916 (255)			132
fig|1029756.3.peg.917 (461)	K16011	algA; mannose-1-phosphate guanylyltransferase / mannose-6-phosphate isomerase [EC:2.7.7.13 5.3.1.8]	224	K00971	46
fig|1029756.3.peg.918 (119)			1	K02361	1
fig|1029756.3.peg.919 (42)			3	K03790	1
fig|1029756.3.peg.920 (388)			34	K02454	1
fig|1029756.3.peg.921 (95)			2	K01187	1
fig|1029756.3.peg.922 (60)			1	K03524	1
fig|1029756.3.peg.923 (1096)			273	K22278	90
fig|1029756.3.peg.924 (236)			29	K16079	1
fig|1029756.3.peg.925 (64)			2	K06287	1
fig|1029756.3.peg.926 (369)			238
fig|1029756.3.peg.927 (74)			1	K03737	1
fig|1029756.3.peg.928 (75)
fig|1029756.3.peg.929 (472)	K09458	fabF; 3-oxoacyl-[acyl-carrier-protein] synthase II [EC:2.3.1.179]	275
fig|1029756.3.peg.930 (401)	K00626	E2.3.1.9; acetyl-CoA C-acetyltransferase [EC:2.3.1.9]	347
fig|1029756.3.peg.931 (472)			318
fig|1029756.3.peg.932 (332)			170
fig|1029756.3.peg.933 (1034)			950
fig|1029756.3.peg.934 (194)	K16137	nemR; TetR/AcrR family transcriptional regulator, transcriptional repressor for nem operon	69
fig|1029756.3.peg.935 (308)			102
fig|1029756.3.peg.936 (277)			135
fig|1029756.3.peg.937 (191)			24	K16137	23
fig|1029756.3.peg.938 (135)			38
fig|1029756.3.peg.939 (296)			84
fig|1029756.3.peg.940 (280)			18	K07088	1
fig|1029756.3.peg.941 (338)	K00064	E1.1.1.122; D-threo-aldose 1-dehydrogenase [EC:1.1.1.122]	256
fig|1029756.3.peg.942 (310)			163
fig|1029756.3.peg.943 (529)			187
fig|1029756.3.peg.944 (237)			37
fig|1029756.3.peg.945 (242)	K03620	hyaC; Ni/Fe-hydrogenase 1 B-type cytochrome subunit	27
fig|1029756.3.peg.946 (453)			200
fig|1029756.3.peg.947 (226)	K02483	two-component system	161
fig|1029756.3.peg.948 (330)			20	K15727	19
fig|1029756.3.peg.949 (1039)	K15726	czcA; cobalt-zinc-cadmium resistance protein CzcA	789
fig|1029756.3.peg.950 (114)			24	K04751	1
fig|1029756.3.peg.951 (478)			135
fig|1029756.3.peg.952 (130)			129
fig|1029756.3.peg.953 (148)			3	K01265	1
fig|1029756.3.peg.954 (224)	K03496	parA; chromosome partitioning protein	54
fig|1029756.3.peg.955 (438)			1
fig|1029756.3.peg.956 (369)			27	K00600	1
fig|1029756.3.peg.957 (121)			2	K07482	1
fig|1029756.3.peg.958 (419)			6	K00927	1
fig|1029756.3.peg.959 (132)			11	K02564	1
fig|1029756.3.peg.960 (119)			3	K21929	1
fig|1029756.3.peg.961 (464)			9	K09118	1
fig|1029756.3.peg.962 (98)			4	K03829	1
fig|1029756.3.peg.963 (305)			1	K06217	1
fig|1029756.3.peg.964 (199)			4	K00939	1
fig|1029756.3.peg.965 (133)			2	K03149	1
fig|1029756.3.peg.966 (552)	K03205	virD4; type IV secretion system protein VirD4	41
fig|1029756.3.peg.967 (66)			2	K11206	1
fig|1029756.3.peg.968 (77)			31
fig|1029756.3.peg.969 (865)			35	K01156	16
fig|1029756.3.peg.970 (696)	K07316	mod; adenine-specific DNA-methyltransferase [EC:2.1.1.72]	446
fig|1029756.3.peg.971 (270)			236
fig|1029756.3.peg.972 (296)			185
fig|1029756.3.peg.973 (61)			2	K13057	1
fig|1029756.3.peg.974 (58)	K13583	gcrA; GcrA cell cycle regulator	10
fig|1029756.3.peg.975 (38)
fig|1029756.3.peg.976 (87)			58
fig|1029756.3.peg.977 (48)
fig|1029756.3.peg.978 (59)			1
fig|1029756.3.peg.979 (428)			15	K13924	4
fig|1029756.3.peg.980 (87)			42	K18481	1
fig|1029756.3.peg.981 (45)			2	K11749	1
fig|1029756.3.peg.982 (71)	K03704	cspA; cold shock protein (beta-ribbon, CspA family)	64
fig|1029756.3.peg.983 (39)
fig|1029756.3.peg.984 (69)	K03704	cspA; cold shock protein (beta-ribbon, CspA family)	68
fig|1029756.3.peg.985 (73)			2	K00046	1
fig|1029756.3.peg.986 (67)			24	K02071	1
fig|1029756.3.peg.987 (65)			4	K16211	1
fig|1029756.3.peg.988 (45)			9	K03733	1
fig|1029756.3.peg.989 (187)			97	K07494	19
fig|1029756.3.peg.990 (127)			26	K07499	6
fig|1029756.3.peg.991 (83)
fig|1029756.3.peg.992 (456)	K03455	TC.KEF; monovalent cation:H+ antiporter-2, CPA2 family	166
fig|1029756.3.peg.993 (729)			507
fig|1029756.3.peg.994 (357)			280
fig|1029756.3.peg.995 (105)			4	K01697	1
fig|1029756.3.peg.996 (109)
fig|1029756.3.peg.997 (65)			4	K07316	1
fig|1029756.3.peg.998 (58)
fig|1029756.3.peg.999 (247)			37	K13924	2
fig|1029756.3.peg.1000 (1572)	K13924	cheBR; two-component system, chemotaxis family, CheB/CheR fusion protein [EC:2.1.1.80 3.1.1.61]	312
fig|1029756.3.peg.1001 (41)			5	K01897	1
fig|1029756.3.peg.1002 (135)			3	K02116	1
fig|1029756.3.peg.1003 (50)
fig|1029756.3.peg.1004 (49)			4	K09384	1
fig|1029756.3.peg.1005 (42)			1
fig|1029756.3.peg.1006 (148)			5	K02906	1
fig|1029756.3.peg.1007 (288)			256
fig|1029756.3.peg.1008 (44)			10	K03733	1
fig|1029756.3.peg.1009 (143)	K04047	dps; starvation-inducible DNA-binding protein	71
fig|1029756.3.peg.1010 (321)			114
fig|1029756.3.peg.1011 (224)	K07006	uncharacterized protein	79
fig|1029756.3.peg.1012 (503)	K03307	TC.SSS; solute:Na+ symporter, SSS family	130
fig|1029756.3.peg.1013 (77)			4	K01087	1
fig|1029756.3.peg.1014 (73)			6	K07006	1
fig|1029756.3.peg.1015 (117)			65
fig|1029756.3.peg.1016 (86)			69
fig|1029756.3.peg.1017 (572)	K03321	TC.SULP; sulfate permease, SulP family	502
fig|1029756.3.peg.1018 (53)
fig|1029756.3.peg.1019 (441)			14	K09476	1
fig|1029756.3.peg.1020 (762)			352
fig|1029756.3.peg.1021 (492)			134
fig|1029756.3.peg.1022 (469)	K06213	mgtE; magnesium transporter	220
fig|1029756.3.peg.1023 (297)			109
fig|1029756.3.peg.1024 (370)			287
fig|1029756.3.peg.1025 (42)
fig|1029756.3.peg.1026 (37)			2	K04763	1
fig|1029756.3.peg.1027 (293)			87
fig|1029756.3.peg.1028 (378)	K01524	ppx-gppA; exopolyphosphatase / guanosine-5'-triphosphate,3'-diphosphate pyrophosphatase [EC:3.6.1.11 3.6.1.40]	260
fig|1029756.3.peg.1029 (250)	K02427	rlmE; 23S rRNA (uridine2552-2'-O)-methyltransferase [EC:2.1.1.166]	181
fig|1029756.3.peg.1030 (55)
fig|1029756.3.peg.1031 (499)	K00088	IMPDH; IMP dehydrogenase [EC:1.1.1.205]	502
fig|1029756.3.peg.1032 (147)			62
fig|1029756.3.peg.1033 (436)	K03500	rsmB; 16S rRNA (cytosine967-C5)-methyltransferase [EC:2.1.1.176]	290
fig|1029756.3.peg.1034 (151)	K05770	TSPO; translocator protein	79
fig|1029756.3.peg.1035 (321)	K00684	aat; leucyl/phenylalanyl-tRNA---protein transferase [EC:2.3.2.6]	57
fig|1029756.3.peg.1036 (515)	K01951	guaA; GMP synthase (glutamine-hydrolysing) [EC:6.3.5.2]	598
fig|1029756.3.peg.1037 (109)			14	K02528	1
fig|1029756.3.peg.1038 (768)			715	K00123	79
fig|1029756.3.peg.1039 (261)	K14998	SURF1; surfeit locus 1 family protein	147
fig|1029756.3.peg.1040 (133)	K02300	cyoD; cytochrome o ubiquinol oxidase subunit IV	83
fig|1029756.3.peg.1041 (210)	K02299	cyoC; cytochrome o ubiquinol oxidase subunit III	315
fig|1029756.3.peg.1042 (670)	K02298	cyoB; cytochrome o ubiquinol oxidase subunit I [EC:1.10.3.10]	1117
fig|1029756.3.peg.1043 (368)	K02297	cyoA; cytochrome o ubiquinol oxidase subunit II [EC:1.10.3.10]	287
fig|1029756.3.peg.1044 (445)			365
fig|1029756.3.peg.1045 (519)	K03670	mdoG; periplasmic glucans biosynthesis protein	372
fig|1029756.3.peg.1046 (121)			128
fig|1029756.3.peg.1047 (59)			1	K01889	1
fig|1029756.3.peg.1048 (442)	K03301	TC.AAA; ATP:ADP antiporter, AAA family	271
fig|1029756.3.peg.1049 (312)			165
fig|1029756.3.peg.1050 (322)	K02836	prfB; peptide chain release factor 2	357
fig|1029756.3.peg.1051 (832)	K05366	mrcA; penicillin-binding protein 1A [EC:2.4.1.129 3.4.16.4]	675
fig|1029756.3.peg.1052 (418)	K01448	amiABC; N-acetylmuramoyl-L-alanine amidase [EC:3.5.1.28]	201
fig|1029756.3.peg.1053 (83)			2	K11747	1
fig|1029756.3.peg.1054 (51)			1	K01150	1
fig|1029756.3.peg.1055 (1023)	K08300	rne; ribonuclease E [EC:3.1.26.12]	363
fig|1029756.3.peg.1056 (196)			8	K01608	1
fig|1029756.3.peg.1057 (399)			284
fig|1029756.3.peg.1058 (69)			2
fig|1029756.3.peg.1059 (476)			265
fig|1029756.3.peg.1060 (283)			103
fig|1029756.3.peg.1061 (202)	K03786	aroQ; 3-dehydroquinate dehydratase II [EC:4.2.1.10]	72
fig|1029756.3.peg.1062 (186)	K02160	accB; acetyl-CoA carboxylase biotin carboxyl carrier protein	84
fig|1029756.3.peg.1063 (446)	K01961	accC; acetyl-CoA carboxylase, biotin carboxylase subunit [EC:6.4.1.2 6.3.4.14]	520
fig|1029756.3.peg.1064 (44)
fig|1029756.3.peg.1065 (227)	K00684	aat; leucyl/phenylalanyl-tRNA---protein transferase [EC:2.3.2.6]	195
fig|1029756.3.peg.1066 (296)	K06969	rlmI; 23S rRNA (cytosine1962-C5)-methyltransferase [EC:2.1.1.191]	182
fig|1029756.3.peg.1067 (259)	K03437	spoU; RNA methyltransferase, TrmH family	237
fig|1029756.3.peg.1068 (112)	K07461	putative endonuclease	53
fig|1029756.3.peg.1069 (249)	K00059	fabG; 3-oxoacyl-[acyl-carrier protein] reductase [EC:1.1.1.100]	200
fig|1029756.3.peg.1070 (301)	K04518	pheA2; prephenate dehydratase [EC:4.2.1.51]	257
fig|1029756.3.peg.1071 (248)	K00979	kdsB; 3-deoxy-manno-octulosonate cytidylyltransferase (CMP-KDO synthetase) [EC:2.7.7.38]	216
fig|1029756.3.peg.1072 (210)	K08738	CYC; cytochrome c	86
fig|1029756.3.peg.1073 (114)			3
fig|1029756.3.peg.1074 (607)	K13893	yejA; microcin C transport system substrate-binding protein	544
fig|1029756.3.peg.1075 (617)	K13893	yejA; microcin C transport system substrate-binding protein	640
fig|1029756.3.peg.1076 (370)	K13894	yejB; microcin C transport system permease protein	399
fig|1029756.3.peg.1077 (412)	K13895	yejE; microcin C transport system permease protein	394
fig|1029756.3.peg.1078 (543)	K13896	yejF; microcin C transport system ATP-binding protein	532
fig|1029756.3.peg.1079 (172)			6	K01960	1
fig|1029756.3.peg.1080 (336)			153
fig|1029756.3.peg.1081 (503)	K01255	CARP; leucyl aminopeptidase [EC:3.4.11.1]	295
fig|1029756.3.peg.1082 (224)	K00799	GST; glutathione S-transferase [EC:2.5.1.18]	112
fig|1029756.3.peg.1083 (326)			67
fig|1029756.3.peg.1084 (324)	K12511	tadC; tight adherence protein C	247
fig|1029756.3.peg.1085 (336)	K12510	tadB; tight adherence protein B	203
fig|1029756.3.peg.1086 (492)	K02283	cpaF; pilus assembly protein CpaF	489
fig|1029756.3.peg.1087 (435)	K02282	cpaE; pilus assembly protein CpaE	308
fig|1029756.3.peg.1088 (251)	K02281	cpaD; pilus assembly protein CpaD	108
fig|1029756.3.peg.1089 (546)	K02280	cpaC; pilus assembly protein CpaC	262
fig|1029756.3.peg.1090 (242)	K02279	cpaB; pilus assembly protein CpaB	122
fig|1029756.3.peg.1091 (153)	K02278	cpaA; prepilin peptidase CpaA [EC:3.4.23.43]	75
fig|1029756.3.peg.1092 (55)	K02651	flp; pilus assembly protein Flp/PilA	21
fig|1029756.3.peg.1093 (59)	K02651	flp; pilus assembly protein Flp/PilA	34
fig|1029756.3.peg.1094 (38)
fig|1029756.3.peg.1095 (987)	K03070	secA; preprotein translocase subunit SecA	870
fig|1029756.3.peg.1096 (349)	K03769	ppiC; peptidyl-prolyl cis-trans isomerase C [EC:5.2.1.8]	111
fig|1029756.3.peg.1097 (415)	K00620	argJ; glutamate N-acetyltransferase / amino-acid N-acetyltransferase [EC:2.3.1.35 2.3.1.1]	496
fig|1029756.3.peg.1098 (218)	K00569	TPMT; thiopurine S-methyltransferase [EC:2.1.1.67]	133
fig|1029756.3.peg.1099 (420)	K00833	bioA; adenosylmethionine---8-amino-7-oxononanoate aminotransferase [EC:2.6.1.62]	492
fig|1029756.3.peg.1100 (208)	K01935	bioD; dethiobiotin synthetase [EC:6.3.3.3]	200
fig|1029756.3.peg.1101 (379)	K00652	bioF; 8-amino-7-oxononanoate synthase [EC:2.3.1.47]	302
fig|1029756.3.peg.1102 (370)	K01012	bioB; biotin synthase [EC:2.8.1.6]	267
fig|1029756.3.peg.1103 (91)			15	K08161	1
fig|1029756.3.peg.1104 (667)	K07093	uncharacterized protein	541
fig|1029756.3.peg.1105 (171)			10	K10716	1
fig|1029756.3.peg.1106 (189)			116
fig|1029756.3.peg.1107 (309)	K02275	coxB; cytochrome c oxidase subunit II [EC:1.9.3.1]	165
fig|1029756.3.peg.1108 (387)	K02257	COX10; heme o synthase [EC:2.5.1.141]	212
fig|1029756.3.peg.1109 (48)			11	K03100	1
fig|1029756.3.peg.1110 (211)	K02258	COX11; cytochrome c oxidase assembly protein subunit 11	111
fig|1029756.3.peg.1111 (317)	K02276	coxC; cytochrome c oxidase subunit III [EC:1.9.3.1]	239
fig|1029756.3.peg.1112 (132)			77
fig|1029756.3.peg.1113 (264)	K14998	SURF1; surfeit locus 1 family protein	101
fig|1029756.3.peg.1114 (469)	K01733	thrC; threonine synthase [EC:4.2.3.1]	405
fig|1029756.3.peg.1115 (433)			274
fig|1029756.3.peg.1116 (199)	K03790	rimJ; [ribosomal protein S5]-alanine N-acetyltransferase [EC:2.3.1.267]	142
fig|1029756.3.peg.1117 (1347)			383
fig|1029756.3.peg.1118 (202)	K07735	algH; putative transcriptional regulator	227
fig|1029756.3.peg.1119 (243)			102
fig|1029756.3.peg.1120 (160)			128
fig|1029756.3.peg.1121 (178)			15
fig|1029756.3.peg.1122 (154)	K03469	rnhA; ribonuclease HI [EC:3.1.26.4]	173
fig|1029756.3.peg.1123 (323)	K02204	thrB2; homoserine kinase type II [EC:2.7.1.39]	411
fig|1029756.3.peg.1124 (362)	K03527	ispH; 4-hydroxy-3-methylbut-2-en-1-yl diphosphate reductase [EC:1.17.7.4]	286
fig|1029756.3.peg.1125 (218)			55
fig|1029756.3.peg.1126 (121)			13	K02445	1
fig|1029756.3.peg.1127 (163)	K02109	ATPF0B; F-type H+-transporting ATPase subunit b	102
fig|1029756.3.peg.1128 (193)	K02109	ATPF0B; F-type H+-transporting ATPase subunit b	77
fig|1029756.3.peg.1129 (74)	K02110	ATPF0C; F-type H+-transporting ATPase subunit c	87
fig|1029756.3.peg.1130 (251)	K02108	ATPF0A; F-type H+-transporting ATPase subunit a	239
fig|1029756.3.peg.1131 (126)	K02116	atpI; ATP synthase protein I	36
fig|1029756.3.peg.1132 (1153)	K03529	smc; chromosome segregation protein	700
fig|1029756.3.peg.1133 (270)			76
fig|1029756.3.peg.1134 (231)			120
fig|1029756.3.peg.1135 (200)			55
fig|1029756.3.peg.1136 (368)	K03575	mutY; A/G-specific adenine glycosylase [EC:3.2.2.31]	270
fig|1029756.3.peg.1137 (431)			11	K12132	1
fig|1029756.3.peg.1138 (155)			51	K10914	8
fig|1029756.3.peg.1139 (392)	K13581	ccrM; modification methylase [EC:2.1.1.72]	321
fig|1029756.3.peg.1140 (572)	K03406	mcp; methyl-accepting chemotaxis protein	87
fig|1029756.3.peg.1141 (55)
fig|1029756.3.peg.1142 (221)	K02884	RP-L19; large subunit ribosomal protein L19	164
fig|1029756.3.peg.1143 (273)	K01265	map; methionyl aminopeptidase [EC:3.4.11.18]	400
fig|1029756.3.peg.1144 (254)	K03630	radC; DNA repair protein RadC	194
fig|1029756.3.peg.1145 (296)			61
fig|1029756.3.peg.1146 (323)	K00384	trxB; thioredoxin reductase (NADPH) [EC:1.8.1.9]	349
fig|1029756.3.peg.1147 (289)			82
fig|1029756.3.peg.1148 (79)			2	K03561	1
fig|1029756.3.peg.1149 (300)			237
fig|1029756.3.peg.1150 (468)	K01703	leuC; 3-isopropylmalate/(R)-2-methylmalate dehydratase large subunit [EC:4.2.1.33 4.2.1.35]	695
fig|1029756.3.peg.1151 (139)			92
fig|1029756.3.peg.1152 (178)			34	K00088	1
fig|1029756.3.peg.1153 (143)			14	K02834	1
fig|1029756.3.peg.1154 (201)	K01704	leuD; 3-isopropylmalate/(R)-2-methylmalate dehydratase small subunit [EC:4.2.1.33 4.2.1.35]	310
fig|1029756.3.peg.1155 (340)	K01286	E3.4.16.4; D-alanyl-D-alanine carboxypeptidase [EC:3.4.16.4]	131
fig|1029756.3.peg.1156 (104)			3	K04335	1
fig|1029756.3.peg.1157 (499)	K00104	glcD; glycolate oxidase [EC:1.1.3.15]	590
fig|1029756.3.peg.1158 (406)	K11472	glcE; glycolate oxidase FAD binding subunit	255
fig|1029756.3.peg.1159 (457)	K11473	glcF; glycolate oxidase iron-sulfur subunit	374
fig|1029756.3.peg.1160 (278)			40	K01090	12
fig|1029756.3.peg.1161 (379)	K07261	mepA; penicillin-insensitive murein DD-endopeptidase [EC:3.4.24.-]	206
fig|1029756.3.peg.1162 (137)			73
fig|1029756.3.peg.1163 (312)			202
fig|1029756.3.peg.1164 (201)	K01495	GCH1; GTP cyclohydrolase IA [EC:3.5.4.16]	178
fig|1029756.3.peg.1165 (237)			74
fig|1029756.3.peg.1166 (253)	K06173	truA; tRNA pseudouridine38-40 synthase [EC:5.4.99.12]	218
fig|1029756.3.peg.1167 (83)			5	K02836	1
fig|1029756.3.peg.1168 (312)	K00604	MTFMT; methionyl-tRNA formyltransferase [EC:2.1.2.9]	267
fig|1029756.3.peg.1169 (173)	K01462	PDF; peptide deformylase [EC:3.5.1.88]	210
fig|1029756.3.peg.1170 (155)			34	K05844	11
fig|1029756.3.peg.1171 (365)			89
fig|1029756.3.peg.1172 (454)			295
fig|1029756.3.peg.1173 (226)	K06187	recR; recombination protein RecR	160
fig|1029756.3.peg.1174 (348)			76
fig|1029756.3.peg.1175 (144)			36	K22296	2
fig|1029756.3.peg.1176 (748)			253
fig|1029756.3.peg.1177 (225)	K03710	GntR family transcriptional regulator	60
fig|1029756.3.peg.1178 (53)			8
fig|1029756.3.peg.1179 (147)			60
fig|1029756.3.peg.1180 (554)			201
fig|1029756.3.peg.1181 (492)			209
fig|1029756.3.peg.1182 (429)			103
fig|1029756.3.peg.1183 (249)	K06988	fno; 8-hydroxy-5-deazaflavin:NADPH oxidoreductase [EC:1.5.1.40]	80
fig|1029756.3.peg.1185 (618)	K03342	pabBC; para-aminobenzoate synthetase / 4-amino-4-deoxychorismate lyase [EC:2.6.1.85 4.1.3.38]	359
fig|1029756.3.peg.1186 (80)			2	K07301	1
fig|1029756.3.peg.1187 (58)			15
fig|1029756.3.peg.1188 (38)			8
fig|1029756.3.peg.1189 (838)	K03579	hrpB; ATP-dependent helicase HrpB [EC:3.6.4.13]	637
fig|1029756.3.peg.1190 (165)			43
fig|1029756.3.peg.1191 (150)			18	K01822	1
fig|1029756.3.peg.1192 (428)	K00574	cfa; cyclopropane-fatty-acyl-phospholipid synthase [EC:2.1.1.79]	332
fig|1029756.3.peg.1193 (230)	K01783	rpe; ribulose-phosphate 3-epimerase [EC:5.1.3.1]	221
fig|1029756.3.peg.1194 (276)	K00675	nhoA; N-hydroxyarylamine O-acetyltransferase [EC:2.3.1.118]	188
fig|1029756.3.peg.1195 (154)
fig|1029756.3.peg.1196 (392)			180
fig|1029756.3.peg.1197 (292)	K00855	PRK; phosphoribulokinase [EC:2.7.1.19]	309
fig|1029756.3.peg.1198 (346)	K03841	FBP; fructose-1,6-bisphosphatase I [EC:3.1.3.11]	292
fig|1029756.3.peg.1199 (243)	K07395	putative proteasome-type protease	281
fig|1029756.3.peg.1200 (274)			175
fig|1029756.3.peg.1201 (315)			300
fig|1029756.3.peg.1202 (479)			463
fig|1029756.3.peg.1203 (72)			1	K04761	1
fig|1029756.3.peg.1204 (188)			103
fig|1029756.3.peg.1205 (226)			133
fig|1029756.3.peg.1206 (108)			10
fig|1029756.3.peg.1207 (90)			12	K00655	1
fig|1029756.3.peg.1208 (69)			7	K02381	1
fig|1029756.3.peg.1209 (75)			7	K21686	1
fig|1029756.3.peg.1210 (201)			26	K07446	1
fig|1029756.3.peg.1211 (200)			14	K07498	1
fig|1029756.3.peg.1212 (47)			1	K00075	1
fig|1029756.3.peg.1213 (658)			101
fig|1029756.3.peg.1214 (532)	K07459	ybjD; putative ATP-dependent endonuclease of the OLD family	179
fig|1029756.3.peg.1215 (54)			1	K12143	1
fig|1029756.3.peg.1216 (377)			22	K22516	1
fig|1029756.3.peg.1217 (408)	K00558	DNMT1; DNA (cytosine-5)-methyltransferase 1 [EC:2.1.1.37]	212
fig|1029756.3.peg.1218 (58)
fig|1029756.3.peg.1219 (332)			237
fig|1029756.3.peg.1220 (201)			126
fig|1029756.3.peg.1221 (273)			4	K01755	1
fig|1029756.3.peg.1222 (269)			1	K17488	1
fig|1029756.3.peg.1223 (115)			20	K03041	0
fig|1029756.3.peg.1224 (40)
fig|1029756.3.peg.1225 (47)
fig|1029756.3.peg.1226 (144)			10	K07489	1
fig|1029756.3.peg.1227 (74)			14	K14393	1
fig|1029756.3.peg.1228 (40)			3
fig|1029756.3.peg.1229 (538)	K03205	virD4; type IV secretion system protein VirD4	289
fig|1029756.3.peg.1230 (102)			18	K03466	0
fig|1029756.3.peg.1231 (47)
fig|1029756.3.peg.1232 (85)			5	K12297	1
fig|1029756.3.peg.1233 (144)			13	K22067	1
fig|1029756.3.peg.1234 (328)			55	K03565	1
fig|1029756.3.peg.1235 (91)			6	K03088	1
fig|1029756.3.peg.1236 (446)			178
fig|1029756.3.peg.1237 (60)			2	K02035	1
fig|1029756.3.peg.1238 (207)	K01495	GCH1; GTP cyclohydrolase IA [EC:3.5.4.16]	166
fig|1029756.3.peg.1239 (192)			19	K03296	1
fig|1029756.3.peg.1240 (60)			2
fig|1029756.3.peg.1241 (134)	K09823	zur; Fur family transcriptional regulator, zinc uptake regulator	59
fig|1029756.3.peg.1242 (77)			21	K03820	1
fig|1029756.3.peg.1243 (44)
fig|1029756.3.peg.1244 (757)	K02014	TC.FEV.OM; iron complex outermembrane recepter protein	174
fig|1029756.3.peg.1245 (1303)	K02230	cobN; cobaltochelatase CobN [EC:6.6.1.2]	651
fig|1029756.3.peg.1246 (158)			107
fig|1029756.3.peg.1247 (108)			65
fig|1029756.3.peg.1248 (402)			297
fig|1029756.3.peg.1249 (60)			4
fig|1029756.3.peg.1250 (73)			2	K09796	1
fig|1029756.3.peg.1251 (356)	K01993	ABC-2.TX; HlyD family secretion protein	259
fig|1029756.3.peg.1252 (916)	K13926	rbbA; ribosome-dependent ATPase	900
fig|1029756.3.peg.1253 (370)	K01992	ABC-2.P; ABC-2 type transport system permease protein	373
fig|1029756.3.peg.1254 (188)			19	K13770	1
fig|1029756.3.peg.1255 (313)	K00603	fctD; glutamate formiminotransferase [EC:2.1.2.5]	173	K01746	14
fig|1029756.3.peg.1256 (516)			315
fig|1029756.3.peg.1257 (560)	K01938	fhs; formate--tetrahydrofolate ligase [EC:6.3.4.3]	830
fig|1029756.3.peg.1258 (207)			50	K01746	5
fig|1029756.3.peg.1259 (466)	K11754	folC; dihydrofolate synthase / folylpolyglutamate synthase [EC:6.3.2.12 6.3.2.17]	245
fig|1029756.3.peg.1260 (323)	K00297	metF; methylenetetrahydrofolate reductase (NADPH) [EC:1.5.1.20]	317
fig|1029756.3.peg.1261 (40)
fig|1029756.3.peg.1262 (105)			12
fig|1029756.3.peg.1263 (388)	K07234	uncharacterized protein involved in response to NO	123
fig|1029756.3.peg.1264 (195)			85
fig|1029756.3.peg.1265 (72)			60
fig|1029756.3.peg.1266 (108)			36	K22042	15
fig|1029756.3.peg.1267 (340)			161
fig|1029756.3.peg.1268 (1070)			1054
fig|1029756.3.peg.1269 (114)			3	K17716	1
fig|1029756.3.peg.1270 (214)			19	K01448	1
fig|1029756.3.peg.1271 (1312)	K09800	tamB; translocation and assembly module TamB	333
fig|1029756.3.peg.1272 (634)	K07278	tamA; translocation and assembly module TamA	428
fig|1029756.3.peg.1273 (290)	K02016	ABC.FEV.S; iron complex transport system substrate-binding protein	269
fig|1029756.3.peg.1274 (482)			135
fig|1029756.3.peg.1275 (292)	K01561	dehH; haloacetate dehalogenase [EC:3.8.1.3]	196
fig|1029756.3.peg.1276 (282)			340
fig|1029756.3.peg.1277 (255)	K03832	tonB; periplasmic protein TonB	20
fig|1029756.3.peg.1278 (150)	K03560	tolR; biopolymer transport protein TolR	84	K03559	9
fig|1029756.3.peg.1279 (239)			132	K03562	15
fig|1029756.3.peg.1280 (145)			28
fig|1029756.3.peg.1281 (915)	K16091	fecA; Fe(3+) dicitrate transport protein	310
fig|1029756.3.peg.1282 (125)			15	K09810	1
fig|1029756.3.peg.1283 (322)	K00015	gyaR; glyoxylate reductase [EC:1.1.1.26]	91
fig|1029756.3.peg.1284 (147)			2	K03618	1
fig|1029756.3.peg.1285 (278)	K07001	NTE family protein	167
fig|1029756.3.peg.1286 (154)	K11991	tadA; tRNA(adenine34) deaminase [EC:3.5.4.33]	127
fig|1029756.3.peg.1287 (484)	K06178	rluB; 23S rRNA pseudouridine2605 synthase [EC:5.4.99.22]	96
fig|1029756.3.peg.1288 (191)	K08316	rsmD; 16S rRNA (guanine966-N2)-methyltransferase [EC:2.1.1.171]	153
fig|1029756.3.peg.1289 (596)	K03572	mutL; DNA mismatch repair protein MutL	456
fig|1029756.3.peg.1290 (139)			4	K17484	1
fig|1029756.3.peg.1291 (465)	K00102	LDHD; D-lactate dehydrogenase (cytochrome) [EC:1.1.2.4]	413
fig|1029756.3.peg.1292 (484)			9	K01174	1
fig|1029756.3.peg.1293 (50)
fig|1029756.3.peg.1294 (183)			31
fig|1029756.3.peg.1295 (794)			112
fig|1029756.3.peg.1296 (65)			1
fig|1029756.3.peg.1297 (249)			7	K21397	1
fig|1029756.3.peg.1298 (246)			15	K00655	1
fig|1029756.3.peg.1299 (286)	K20074	prpC; PPM family protein phosphatase [EC:3.1.3.16]	70
fig|1029756.3.peg.1300 (591)	K03455	TC.KEF; monovalent cation:H+ antiporter-2, CPA2 family	398
fig|1029756.3.peg.1301 (47)
fig|1029756.3.peg.1302 (215)	K03470	rnhB; ribonuclease HII [EC:3.1.26.4]	178
fig|1029756.3.peg.1303 (379)			316
fig|1029756.3.peg.1304 (245)			123
fig|1029756.3.peg.1305 (56)
fig|1029756.3.peg.1306 (304)	K21929	udg; uracil-DNA glycosylase [EC:3.2.2.27]	40
fig|1029756.3.peg.1307 (547)	K00311	ETFDH; electron-transferring-flavoprotein dehydrogenase [EC:1.5.5.1]	547
fig|1029756.3.peg.1308 (59)			2	K17227	1
fig|1029756.3.peg.1309 (701)			62
fig|1029756.3.peg.1310 (54)
fig|1029756.3.peg.1311 (120)	K00919	ispE; 4-diphosphocytidyl-2-C-methyl-D-erythritol kinase [EC:2.7.1.148]	11
fig|1029756.3.peg.1312 (338)	K02523	ispB; octaprenyl-diphosphate synthase [EC:2.5.1.90]	322
fig|1029756.3.peg.1313 (263)			114
fig|1029756.3.peg.1314 (279)			201
fig|1029756.3.peg.1315 (58)			12	K11736	1
fig|1029756.3.peg.1316 (331)	K01878	glyQ; glycyl-tRNA synthetase alpha chain [EC:6.1.1.14]	312
fig|1029756.3.peg.1317 (121)			3	K00658	1
fig|1029756.3.peg.1318 (768)	K01879	glyS; glycyl-tRNA synthetase beta chain [EC:6.1.1.14]	514
fig|1029756.3.peg.1319 (64)			3	K07404	1
fig|1029756.3.peg.1320 (636)	K06158	ABCF3; ATP-binding cassette, subfamily F, member 3	535
fig|1029756.3.peg.1321 (323)			18	K04748	1
fig|1029756.3.peg.1322 (41)
fig|1029756.3.peg.1323 (140)	K00940	ndk; nucleoside-diphosphate kinase [EC:2.7.4.6]	146
fig|1029756.3.peg.1324 (454)			271
fig|1029756.3.peg.1325 (69)			2
fig|1029756.3.peg.1326 (221)	K11175	purN; phosphoribosylglycinamide formyltransferase 1 [EC:2.1.2.2]	199
fig|1029756.3.peg.1327 (379)	K01933	purM; phosphoribosylformylglycinamidine cyclo-ligase [EC:6.3.3.1]	297
fig|1029756.3.peg.1328 (376)			129
fig|1029756.3.peg.1329 (198)	K08744	CRLS; cardiolipin synthase (CMP-forming) [EC:2.7.8.41]	155
fig|1029756.3.peg.1330 (364)			208
fig|1029756.3.peg.1331 (240)			117
fig|1029756.3.peg.1332 (712)	K00937	ppk; polyphosphate kinase [EC:2.7.4.1]	672
fig|1029756.3.peg.1333 (509)	K01524	ppx-gppA; exopolyphosphatase / guanosine-5'-triphosphate,3'-diphosphate pyrophosphatase [EC:3.6.1.11 3.6.1.40]	338
fig|1029756.3.peg.1334 (302)			205
fig|1029756.3.peg.1335 (385)	K03684	rnd; ribonuclease D [EC:3.1.13.5]	455
fig|1029756.3.peg.1336 (37)			3	K03978	1
fig|1029756.3.peg.1337 (177)			2	K02557	1
fig|1029756.3.peg.1338 (617)	K01876	aspS; aspartyl-tRNA synthetase [EC:6.1.1.12]	626
fig|1029756.3.peg.1339 (149)	K09768	uncharacterized protein	175
fig|1029756.3.peg.1340 (592)			7	K03694	3
fig|1029756.3.peg.1341 (153)			53
fig|1029756.3.peg.1342 (82)			36
fig|1029756.3.peg.1343 (217)			107	K16327	9
fig|1029756.3.peg.1344 (187)			30	K07459	1
fig|1029756.3.peg.1345 (279)			75
fig|1029756.3.peg.1346 (494)			176
fig|1029756.3.peg.1347 (295)	K06980	ygfZ; tRNA-modifying protein YgfZ	222
fig|1029756.3.peg.1348 (206)	K01246	tag; DNA-3-methyladenine glycosylase I [EC:3.2.2.20]	153
fig|1029756.3.peg.1349 (191)	K06952	uncharacterized protein	142
fig|1029756.3.peg.1350 (317)			190
fig|1029756.3.peg.1351 (366)	K03517	nadA; quinolinate synthase [EC:2.5.1.72]	304
fig|1029756.3.peg.1352 (562)	K00278	nadB; L-aspartate oxidase [EC:1.4.3.16]	356
fig|1029756.3.peg.1353 (287)	K00767	nadC; nicotinate-nucleotide pyrophosphorylase (carboxylating) [EC:2.4.2.19]	256
fig|1029756.3.peg.1354 (104)			4	K10547	1
fig|1029756.3.peg.1355 (903)	K01006	ppdK; pyruvate, orthophosphate dikinase [EC:2.7.9.1]	808
fig|1029756.3.peg.1356 (467)			336	K01436	37
fig|1029756.3.peg.1357 (261)	K01166	E3.1.27.1; ribonuclease T2 [EC:3.1.27.1]	131
fig|1029756.3.peg.1358 (185)			3	K00390	1
fig|1029756.3.peg.1359 (128)			5	K02039	1
fig|1029756.3.peg.1360 (257)			18	K03201	1
fig|1029756.3.peg.1361 (271)			59
fig|1029756.3.peg.1362 (240)			60
fig|1029756.3.peg.1363 (252)			178
fig|1029756.3.peg.1364 (411)			15	K01448	1
fig|1029756.3.peg.1365 (483)			10	K01448	1
fig|1029756.3.peg.1366 (321)			30	K15553	1
fig|1029756.3.peg.1367 (668)	K03703	uvrC; excinuclease ABC subunit C	577
fig|1029756.3.peg.1368 (381)	K10714	mtdB; methylene-tetrahydromethanopterin dehydrogenase [EC:1.5.1.-]	128
fig|1029756.3.peg.1369 (182)	K08744	CRLS; cardiolipin synthase (CMP-forming) [EC:2.7.8.41]	129	K00995	18
fig|1029756.3.peg.1370 (98)	K03636	moaD; sulfur-carrier protein	73
fig|1029756.3.peg.1371 (157)	K03635	MOCS2B; molybdopterin synthase catalytic subunit [EC:2.8.1.12]	135
fig|1029756.3.peg.1372 (61)
fig|1029756.3.peg.1373 (427)	K01448	amiABC; N-acetylmuramoyl-L-alanine amidase [EC:3.5.1.28]	143
fig|1029756.3.peg.1374 (47)			2	K00971	1
fig|1029756.3.peg.1375 (194)			8	K02002	1
fig|1029756.3.peg.1376 (417)			209
fig|1029756.3.peg.1377 (110)			10	K18843	1
fig|1029756.3.peg.1378 (44)
fig|1029756.3.peg.1379 (162)			2	K03497	2
fig|1029756.3.peg.1380 (86)			1	K02028	1
fig|1029756.3.peg.1381 (110)			2	K03781	1
fig|1029756.3.peg.1382 (88)			5	K07722	1
fig|1029756.3.peg.1383 (352)			115
fig|1029756.3.peg.1384 (97)			2	K03497	1
fig|1029756.3.peg.1385 (203)	K01971	ligD; bifunctional non-homologous end joining protein LigD [EC:6.5.1.1]	19
fig|1029756.3.peg.1386 (540)	K01971	ligD; bifunctional non-homologous end joining protein LigD [EC:6.5.1.1]	215
fig|1029756.3.peg.1387 (286)	K10979	ku; DNA end-binding protein Ku	250
fig|1029756.3.peg.1388 (124)			3	K19545	1
fig|1029756.3.peg.1389 (760)			67
fig|1029756.3.peg.1390 (37)			1
fig|1029756.3.peg.1391 (105)			9	K00024	1
fig|1029756.3.peg.1392 (100)			2	K16559	1
fig|1029756.3.peg.1393 (86)			2	K00453	1
fig|1029756.3.peg.1394 (43)
fig|1029756.3.peg.1395 (155)			8	K03482	1
fig|1029756.3.peg.1396 (70)			30
fig|1029756.3.peg.1397 (84)			3	K01515	1
fig|1029756.3.peg.1398 (54)
fig|1029756.3.peg.1399 (221)			2	K03572	1
fig|1029756.3.peg.1400 (98)			3	K09748	1
fig|1029756.3.peg.1401 (59)			3	K03581	1
fig|1029756.3.peg.1402 (53)			5
fig|1029756.3.peg.1403 (44)			4
fig|1029756.3.peg.1404 (96)	K09951	cas2; CRISPR-associated protein Cas2	145
fig|1029756.3.peg.1405 (344)	K15342	cas1; CRISP-associated protein Cas1	493
fig|1029756.3.peg.1406 (219)	K07464	cas4; CRISPR-associated exonuclease Cas4 [EC:3.1.12.1]	268
fig|1029756.3.peg.1407 (315)	K19118	csd2; CRISPR-associated protein Csd2	436
fig|1029756.3.peg.1408 (582)	K19117	csd1; CRISPR-associated protein Csd1	708
fig|1029756.3.peg.1409 (231)	K19119	cas5d; CRISPR-associated protein Cas5d	298
fig|1029756.3.peg.1410 (778)	K07012	cas3; CRISPR-associated endonuclease/helicase Cas3 [EC:3.1.-.- 3.6.4.-]	455
fig|1029756.3.peg.1411 (78)			6	K07487	1
fig|1029756.3.peg.1412 (64)			2	K01439	1
fig|1029756.3.peg.1413 (88)			3	K16216	1
fig|1029756.3.peg.1414 (43)
fig|1029756.3.peg.1415 (872)			139
fig|1029756.3.peg.1416 (476)	K00382	DLD; dihydrolipoamide dehydrogenase [EC:1.8.1.4]	307
fig|1029756.3.peg.1417 (427)	K00627	DLAT; pyruvate dehydrogenase E2 component (dihydrolipoamide acetyltransferase) [EC:2.3.1.12]	265
fig|1029756.3.peg.1418 (889)	K00163	aceE; pyruvate dehydrogenase E1 component [EC:1.2.4.1]	715
fig|1029756.3.peg.1419 (579)			83	K00114	68
fig|1029756.3.peg.1420 (205)	K03890	qcrA; ubiquinol-cytochrome c reductase iron-sulfur subunit	18
fig|1029756.3.peg.1421 (41)
fig|1029756.3.peg.1422 (451)			130
fig|1029756.3.peg.1423 (216)	K00782	lldG; L-lactate dehydrogenase complex protein LldG	116
fig|1029756.3.peg.1424 (473)	K18929	lldF; L-lactate dehydrogenase complex protein LldF	336
fig|1029756.3.peg.1425 (273)	K18928	lldE; L-lactate dehydrogenase complex protein LldE	281
fig|1029756.3.peg.1426 (254)	K05799	pdhR; GntR family transcriptional regulator, transcriptional repressor for pyruvate dehydrogenase complex	161
fig|1029756.3.peg.1427 (653)	K21405	acoR; sigma-54 dependent transcriptional regulator, acetoin dehydrogenase operon transcriptional activator AcoR	187
fig|1029756.3.peg.1428 (487)	K07248	aldA; lactaldehyde dehydrogenase / glycolaldehyde dehydrogenase [EC:1.2.1.22 1.2.1.21]	411
fig|1029756.3.peg.1429 (76)			2	K01434	1
fig|1029756.3.peg.1430 (66)			2	K12658	1
fig|1029756.3.peg.1431 (789)	K07303	iorB; isoquinoline 1-oxidoreductase subunit beta [EC:1.3.99.16]	526
fig|1029756.3.peg.1432 (150)	K07302	iorA; isoquinoline 1-oxidoreductase subunit alpha [EC:1.3.99.16]	133
fig|1029756.3.peg.1433 (549)	K03303	lctP; lactate permease	622
fig|1029756.3.peg.1434 (254)	K05799	pdhR; GntR family transcriptional regulator, transcriptional repressor for pyruvate dehydrogenase complex	145
fig|1029756.3.peg.1435 (331)	K07402	xdhC; xanthine dehydrogenase accessory factor	142
fig|1029756.3.peg.1436 (815)			73	K12678	4
fig|1029756.3.peg.1437 (69)	K03704	cspA; cold shock protein (beta-ribbon, CspA family)	71
fig|1029756.3.peg.1438 (577)			11	K16079	4
fig|1029756.3.peg.1439 (260)	K02013	ABC.FEV.A; iron complex transport system ATP-binding protein [EC:3.6.3.34]	86
fig|1029756.3.peg.1440 (327)	K02015	ABC.FEV.P; iron complex transport system permease protein	123
fig|1029756.3.peg.1441 (298)	K02016	ABC.FEV.S; iron complex transport system substrate-binding protein	74
fig|1029756.3.peg.1442 (758)	K16092	btuB; vitamin B12 transporter	178
fig|1029756.3.peg.1443 (233)			7	K00568	1
fig|1029756.3.peg.1444 (310)	K02303	cobA; uroporphyrin-III C-methyltransferase [EC:2.1.1.107]	148
fig|1029756.3.peg.1445 (255)	K02228	cobF; precorrin-6A synthase [EC:2.1.1.152]	178
fig|1029756.3.peg.1446 (447)	K02224	cobB-cbiA; cobyrinic acid a,c-diamide synthase [EC:6.3.5.9 6.3.5.11]	320
fig|1029756.3.peg.1447 (251)	K05936	cobM; precorrin-4/cobalt-precorrin-4 C11-methyltransferase [EC:2.1.1.133 2.1.1.271]	316
fig|1029756.3.peg.1448 (126)	K02189	cbiG; cobalt-precorrin 5A hydrolase [EC:3.7.1.12]	13	K13541	2
fig|1029756.3.peg.1449 (412)	K00595	cobL; precorrin-6Y C5,15-methyltransferase (decarboxylating) [EC:2.1.1.132]	306
fig|1029756.3.peg.1450 (255)	K05895	cobK-cbiJ; precorrin-6A/cobalt-precorrin-6A reductase [EC:1.3.1.54 1.3.1.106]	180
fig|1029756.3.peg.1451 (254)	K05934	E2.1.1.131; precorrin-3B C17-methyltransferase [EC:2.1.1.131]	201
fig|1029756.3.peg.1452 (252)	K03394	cobI-cbiL; precorrin-2/cobalt-factor-2 C20-methyltransferase [EC:2.1.1.130 2.1.1.151]	238
fig|1029756.3.peg.1453 (210)	K06042	cobH-cbiC; precorrin-8X/cobalt-precorrin-8 methylmutase [EC:5.4.99.61 5.4.99.60]	242
fig|1029756.3.peg.1454 (437)	K02229	cobG; precorrin-3B synthase [EC:1.14.13.83]	119
fig|1029756.3.peg.1455 (1142)	K02230	cobN; cobaltochelatase CobN [EC:6.6.1.2]	689
fig|1029756.3.peg.1456 (345)	K02234	cobW; cobalamin biosynthesis protein CobW	312
fig|1029756.3.peg.1457 (145)			54
fig|1029756.3.peg.1458 (227)	K19221	cobA; cob(I)alamin adenosyltransferase [EC:2.5.1.17]	161
fig|1029756.3.peg.1459 (483)	K02232	cobQ; adenosylcobyric acid synthase [EC:6.3.5.10]	400
fig|1029756.3.peg.1460 (260)	K02013	ABC.FEV.A; iron complex transport system ATP-binding protein [EC:3.6.3.34]	149
fig|1029756.3.peg.1461 (329)	K02015	ABC.FEV.P; iron complex transport system permease protein	245
fig|1029756.3.peg.1462 (286)	K02016	ABC.FEV.S; iron complex transport system substrate-binding protein	185
fig|1029756.3.peg.1463 (664)	K16092	btuB; vitamin B12 transporter	233
fig|1029756.3.peg.1464 (336)			187
fig|1029756.3.peg.1465 (201)			20	K00355	12
fig|1029756.3.peg.1466 (782)	K02014	TC.FEV.OM; iron complex outermembrane recepter protein	339
fig|1029756.3.peg.1467 (346)	K02051	ABC.SN.S; NitT/TauT family transport system substrate-binding protein	152
fig|1029756.3.peg.1468 (270)	K02050	ABC.SN.P; NitT/TauT family transport system permease protein	242
fig|1029756.3.peg.1469 (254)	K02049	ABC.SN.A; NitT/TauT family transport system ATP-binding protein	164
fig|1029756.3.peg.1470 (399)	K07234	uncharacterized protein involved in response to NO	210
fig|1029756.3.peg.1471 (403)	K07234	uncharacterized protein involved in response to NO	271
fig|1029756.3.peg.1472 (435)			55
fig|1029756.3.peg.1473 (426)	K09458	fabF; 3-oxoacyl-[acyl-carrier-protein] synthase II [EC:2.3.1.179]	364
fig|1029756.3.peg.1474 (410)	K09458	fabF; 3-oxoacyl-[acyl-carrier-protein] synthase II [EC:2.3.1.179]	210
fig|1029756.3.peg.1475 (346)			213	K00001	61
fig|1029756.3.peg.1476 (414)	K09458	fabF; 3-oxoacyl-[acyl-carrier-protein] synthase II [EC:2.3.1.179]	332
fig|1029756.3.peg.1477 (409)	K09458	fabF; 3-oxoacyl-[acyl-carrier-protein] synthase II [EC:2.3.1.179]	324
fig|1029756.3.peg.1478 (156)	K02372	fabZ; 3-hydroxyacyl-[acyl-carrier-protein] dehydratase [EC:4.2.1.59]	103
fig|1029756.3.peg.1479 (93)			119
fig|1029756.3.peg.1480 (405)	K00059	fabG; 3-oxoacyl-[acyl-carrier protein] reductase [EC:1.1.1.100]	38	K00208	3
fig|1029756.3.peg.1481 (728)			77
fig|1029756.3.peg.1482 (84)	K02078	acpP; acyl carrier protein	13
fig|1029756.3.peg.1483 (38)			9
fig|1029756.3.peg.1484 (230)	K21563	dnr; CRP/FNR family transcriptional regulator, dissimilatory nitrate respiration regulator	39
fig|1029756.3.peg.1485 (38)		pqqA
fig|1029756.3.peg.1486 (95)	K06138	pqqD; pyrroloquinoline quinone biosynthesis protein D	40
fig|1029756.3.peg.1487 (381)	K06139	pqqE; pyrroloquinoline quinone biosynthesis protein E	239
fig|1029756.3.peg.1488 (168)			57
fig|1029756.3.peg.1489 (356)	K00831	serC; phosphoserine aminotransferase [EC:2.6.1.52]	254
fig|1029756.3.peg.1490 (259)	K00254	DHODH; dihydroorotate dehydrogenase [EC:1.3.5.2]	35
fig|1029756.3.peg.1491 (339)	K03153	thiO; glycine oxidase [EC:1.4.3.19]	197
fig|1029756.3.peg.1492 (301)			305
fig|1029756.3.peg.1493 (333)	K08303	putative protease [EC:3.4.-.-]	312
fig|1029756.3.peg.1494 (186)			56
fig|1029756.3.peg.1495 (505)	K03182	ubiD; 4-hydroxy-3-polyprenylbenzoate decarboxylase [EC:4.1.1.98]	582
fig|1029756.3.peg.1496 (195)	K03186	ubiX; flavin prenyltransferase [EC:2.5.1.129]	147
fig|1029756.3.peg.1497 (346)	K12980	lpxQ; lipid A oxidase	18
fig|1029756.3.peg.1498 (232)			105	K21563	33
fig|1029756.3.peg.1499 (423)	K07234	uncharacterized protein involved in response to NO	135
fig|1029756.3.peg.1500 (150)	K02305	norC; nitric oxide reductase subunit C	169
fig|1029756.3.peg.1501 (459)	K04561	norB; nitric oxide reductase subunit B [EC:1.7.2.5]	495
fig|1029756.3.peg.1502 (268)	K04748	norQ; nitric oxide reductase NorQ protein	284
fig|1029756.3.peg.1503 (653)	K02448	norD; nitric oxide reductase NorD protein	434
fig|1029756.3.peg.1504 (168)	K02164	norE; nitric oxide reductase NorE protein	134
fig|1029756.3.peg.1505 (87)			13	K02049	1
fig|1029756.3.peg.1506 (84)
fig|1029756.3.peg.1507 (227)			60
fig|1029756.3.peg.1508 (330)	K03781	katE; catalase [EC:1.11.1.6]	181
fig|1029756.3.peg.1509 (362)			307
fig|1029756.3.peg.1510 (453)			218
fig|1029756.3.peg.1511 (229)			138
fig|1029756.3.peg.1512 (533)			6	K03286	3
fig|1029756.3.peg.1513 (646)			2	K00334	2
fig|1029756.3.peg.1514 (260)	K03183	ubiE; demethylmenaquinone methyltransferase / 2-methoxy-6-polyprenyl-1,4-benzoquinol methylase [EC:2.1.1.163 2.1.1.201]	214
fig|1029756.3.peg.1515 (305)	K03153	thiO; glycine oxidase [EC:1.4.3.19]	177
fig|1029756.3.peg.1516 (594)	K00681	ggt; gamma-glutamyltranspeptidase / glutathione hydrolase [EC:2.3.2.2 3.4.19.13]	419
fig|1029756.3.peg.1517 (294)			64
fig|1029756.3.peg.1518 (376)	K09815	znuA; zinc transport system substrate-binding protein	175
fig|1029756.3.peg.1519 (223)			116
fig|1029756.3.peg.1520 (374)			105
fig|1029756.3.peg.1521 (525)	K03980	murJ; putative peptidoglycan lipid II flippase	332
fig|1029756.3.peg.1522 (352)	K01867	WARS; tryptophanyl-tRNA synthetase [EC:6.1.1.2]	480
fig|1029756.3.peg.1523 (170)			112
fig|1029756.3.peg.1524 (184)			188
fig|1029756.3.peg.1525 (196)	K09019	rutE; 3-hydroxypropanoate dehydrogenase [EC:1.1.1.-]	241
fig|1029756.3.peg.1526 (232)			43	K14742	36
fig|1029756.3.peg.1527 (161)	K03789	rimI; [ribosomal protein S18]-alanine N-acetyltransferase [EC:2.3.1.266]	57
fig|1029756.3.peg.1528 (295)	K22617	olsA; lyso-ornithine lipid O-acyltransferase [EC:2.3.1.270]	231
fig|1029756.3.peg.1529 (470)	K06168	miaB; tRNA-2-methylthio-N6-dimethylallyladenosine synthase [EC:2.8.4.3]	377
fig|1029756.3.peg.1530 (324)	K06217	phoH; phosphate starvation-inducible protein PhoH and related proteins	269
fig|1029756.3.peg.1531 (186)	K07042	ybeY; probable rRNA maturation factor	80
fig|1029756.3.peg.1532 (366)			188
fig|1029756.3.peg.1533 (556)	K03820	lnt; apolipoprotein N-acyltransferase [EC:2.3.1.269]	357
fig|1029756.3.peg.1534 (154)			106
fig|1029756.3.peg.1535 (400)	K00789	metK; S-adenosylmethionine synthetase [EC:2.5.1.6]	554
fig|1029756.3.peg.1536 (238)	K03439	trmB; tRNA (guanine-N7-)-methyltransferase [EC:2.1.1.33]	174
fig|1029756.3.peg.1537 (209)	K09748	rimP; ribosome maturation factor RimP	115
fig|1029756.3.peg.1538 (551)	K02600	nusA; N utilization substance protein A	539
fig|1029756.3.peg.1539 (238)	K07742	ylxR; uncharacterized protein	95
fig|1029756.3.peg.1540 (903)	K02519	infB; translation initiation factor IF-2	558
fig|1029756.3.peg.1541 (133)	K02834	rbfA; ribosome-binding factor A	151
fig|1029756.3.peg.1542 (195)			2	K02013	1
fig|1029756.3.peg.1543 (225)	K03177	truB; tRNA pseudouridine55 synthase [EC:5.4.99.25]	128
fig|1029756.3.peg.1544 (89)	K02956	RP-S15; small subunit ribosomal protein S15	136
fig|1029756.3.peg.1545 (729)	K00962	pnp; polyribonucleotide nucleotidyltransferase [EC:2.7.7.8]	714
fig|1029756.3.peg.1546 (37)
fig|1029756.3.peg.1547 (172)			16	K00859	1
fig|1029756.3.peg.1548 (245)	K03795	cbiX; sirohydrochlorin cobaltochelatase [EC:4.99.1.3]	10
fig|1029756.3.peg.1549 (198)			115
fig|1029756.3.peg.1550 (119)	K09922	uncharacterized protein	115
fig|1029756.3.peg.1551 (246)	K04564	SOD2; superoxide dismutase, Fe-Mn family [EC:1.15.1.1]	174
fig|1029756.3.peg.1552 (244)	K06442	tlyA; 23S rRNA (cytidine1920-2'-O)/16S rRNA (cytidine1409-2'-O)-methyltransferase [EC:2.1.1.226 2.1.1.227]	166
fig|1029756.3.peg.1553 (408)	K03215	rumA; 23S rRNA (uracil1939-C5)-methyltransferase [EC:2.1.1.190]	223
fig|1029756.3.peg.1554 (55)			10	K15725	1
fig|1029756.3.peg.1555 (418)	K13622	btaA; S-adenosylmethionine-diacylglycerol 3-amino-3-carboxypropyl transferase	378
fig|1029756.3.peg.1556 (220)	K13623	btaB; S-adenosylmethionine-diacylgycerolhomoserine-N-methlytransferase	151
fig|1029756.3.peg.1557 (339)			27
fig|1029756.3.peg.1558 (39)
fig|1029756.3.peg.1559 (82)			6	K05601	1
fig|1029756.3.peg.1560 (322)	K00344	qor; NADPH2:quinone reductase [EC:1.6.5.5]	241
fig|1029756.3.peg.1561 (210)	K11209	yghU; GSH-dependent disulfide-bond oxidoreductase [EC:1.8.4.-]	184
fig|1029756.3.peg.1562 (87)	K07126	uncharacterized protein	61
fig|1029756.3.peg.1563 (312)	K03089	rpoH; RNA polymerase sigma-32 factor	291
fig|1029756.3.peg.1564 (45)
fig|1029756.3.peg.1565 (355)	K06180	rluD; 23S rRNA pseudouridine1911/1915/1917 synthase [EC:5.4.99.23]	282
fig|1029756.3.peg.1566 (121)			10	K01358	1
fig|1029756.3.peg.1567 (553)			26	K13735	1
fig|1029756.3.peg.1568 (247)			203
fig|1029756.3.peg.1569 (302)			231
fig|1029756.3.peg.1570 (45)			10	K03733	1
fig|1029756.3.peg.1571 (352)			160
fig|1029756.3.peg.1572 (180)			72
fig|1029756.3.peg.1573 (408)			3	K00375	1
fig|1029756.3.peg.1574 (515)			222
fig|1029756.3.peg.1575 (66)
fig|1029756.3.peg.1576 (128)			59
fig|1029756.3.peg.1577 (206)			73
fig|1029756.3.peg.1578 (398)			262
fig|1029756.3.peg.1579 (1056)			1002
fig|1029756.3.peg.1580 (446)			322
fig|1029756.3.peg.1581 (327)			192
fig|1029756.3.peg.1582 (460)	K02495	hemN; oxygen-independent coproporphyrinogen III oxidase [EC:1.3.98.3]	284
fig|1029756.3.peg.1583 (447)			231
fig|1029756.3.peg.1584 (528)	K07028	uncharacterized protein	244
fig|1029756.3.peg.1585 (110)			38	K00114	1
fig|1029756.3.peg.1586 (68)			9	K11720	1
fig|1029756.3.peg.1587 (245)	K09792	uncharacterized protein	69
fig|1029756.3.peg.1588 (145)			6	K00626	1
fig|1029756.3.peg.1589 (110)			3	K03269	1
fig|1029756.3.peg.1590 (270)			104
fig|1029756.3.peg.1591 (232)	K01420	fnr; CRP/FNR family transcriptional regulator, anaerobic regulatory protein	38	K15861	10
fig|1029756.3.peg.1592 (558)	K00404	ccoN; cytochrome c oxidase cbb3-type subunit I [EC:1.9.3.1]	519
fig|1029756.3.peg.1593 (244)	K00405	ccoO; cytochrome c oxidase cbb3-type subunit II	246
fig|1029756.3.peg.1594 (77)
fig|1029756.3.peg.1595 (290)	K00406	ccoP; cytochrome c oxidase cbb3-type subunit III	226
fig|1029756.3.peg.1596 (503)			370
fig|1029756.3.peg.1597 (171)			42
fig|1029756.3.peg.1598 (741)	K01533	copB; Cu2+-exporting ATPase [EC:3.6.3.4]	440
fig|1029756.3.peg.1599 (52)			46
fig|1029756.3.peg.1600 (899)			223	K09181	193
fig|1029756.3.peg.1601 (133)			2	K00796	1
fig|1029756.3.peg.1602 (243)	K02483	two-component system	95
fig|1029756.3.peg.1603 (559)			143	K13924	10
fig|1029756.3.peg.1604 (138)	K02019	modE; molybdate transport system regulatory protein	44
fig|1029756.3.peg.1605 (268)	K02020	modA; molybdate transport system substrate-binding protein	173
fig|1029756.3.peg.1606 (297)			111
fig|1029756.3.peg.1607 (79)			11	K07016	1
fig|1029756.3.peg.1608 (185)	K03088	rpoE; RNA polymerase sigma-70 factor, ECF subfamily	123
fig|1029756.3.peg.1609 (286)			190
fig|1029756.3.peg.1610 (114)			49
fig|1029756.3.peg.1611 (171)	K08296	sixA; phosphohistidine phosphatase [EC:3.1.3.-]	137
fig|1029756.3.peg.1612 (59)			12
fig|1029756.3.peg.1613 (37)
fig|1029756.3.peg.1614 (47)			5
fig|1029756.3.peg.1615 (348)			233
fig|1029756.3.peg.1616 (149)	K03711	fur; Fur family transcriptional regulator, ferric uptake regulator	102
fig|1029756.3.peg.1617 (467)	K07267	oprB; porin	227
fig|1029756.3.peg.1618 (323)	K03734	apbE; FAD:protein FMN transferase [EC:2.7.1.180]	174
fig|1029756.3.peg.1619 (187)	K19342	nosL; copper chaperone NosL	121
fig|1029756.3.peg.1620 (276)	K19341	nosY; Cu-processing system permease protein	235
fig|1029756.3.peg.1621 (304)	K19340	nosF; Cu-processing system ATP-binding protein	244
fig|1029756.3.peg.1622 (468)	K07218	nosD; nitrous oxidase accessory protein	376
fig|1029756.3.peg.1623 (646)	K00376	nosZ; nitrous-oxide reductase [EC:1.7.2.4]	687
fig|1029756.3.peg.1624 (707)	K19339	nosR; NosR/NirI family transcriptional regulator, nitrous oxide reductase regulator	594
fig|1029756.3.peg.1625 (113)
fig|1029756.3.peg.1626 (292)			20	K12279	1
fig|1029756.3.peg.1627 (218)			130
fig|1029756.3.peg.1628 (454)			162
fig|1029756.3.peg.1629 (86)			2	K14761	1
fig|1029756.3.peg.1630 (154)			60
fig|1029756.3.peg.1631 (370)	K07168	CBS domain-containing membrane protein	278
fig|1029756.3.peg.1632 (330)			84
fig|1029756.3.peg.1633 (63)			3	K10947	1
fig|1029756.3.peg.1634 (100)			1	K01907	1
fig|1029756.3.peg.1635 (42)			1	K07277	1
fig|1029756.3.peg.1636 (47)			2
fig|1029756.3.peg.1637 (60)
fig|1029756.3.peg.1638 (63)			2	K01817	1
fig|1029756.3.peg.1639 (417)			77	K02022	14
fig|1029756.3.peg.1640 (723)			377
fig|1029756.3.peg.1641 (961)			191	K06148	18
fig|1029756.3.peg.1642 (306)			205
fig|1029756.3.peg.1643 (42)
fig|1029756.3.peg.1644 (399)	K00122	FDH; formate dehydrogenase [EC:1.17.1.9]	399
fig|1029756.3.peg.1645 (169)			62
fig|1029756.3.peg.1646 (152)	K13771	nsrR; Rrf2 family transcriptional regulator, nitric oxide-sensitive transcriptional repressor	107
fig|1029756.3.peg.1647 (76)			2	K15972	1
fig|1029756.3.peg.1648 (49)			2
fig|1029756.3.peg.1649 (131)	K06886	glbN; hemoglobin	90
fig|1029756.3.peg.1650 (395)	K01739	metB; cystathionine gamma-synthase [EC:2.5.1.48]	385
fig|1029756.3.peg.1651 (311)	K00077	panE; 2-dehydropantoate 2-reductase [EC:1.1.1.169]	139
fig|1029756.3.peg.1652 (230)			154
fig|1029756.3.peg.1653 (612)			366
fig|1029756.3.peg.1654 (57)			1	K11071	1
fig|1029756.3.peg.1655 (211)			118
fig|1029756.3.peg.1656 (86)			4	K08084	1
fig|1029756.3.peg.1657 (365)	K01736	aroC; chorismate synthase [EC:4.2.3.5]	535
fig|1029756.3.peg.1658 (195)			123
fig|1029756.3.peg.1659 (282)	K00208	fabI; enoyl-[acyl-carrier protein] reductase I [EC:1.3.1.9 1.3.1.10]	299
fig|1029756.3.peg.1660 (148)			14	K00858	1
fig|1029756.3.peg.1661 (215)	K00275	pdxH; pyridoxamine 5'-phosphate oxidase [EC:1.4.3.5]	129
fig|1029756.3.peg.1662 (322)	K10255	FAD6; acyl-lipid omega-6 desaturase (Delta-12 desaturase) [EC:1.14.19.23 1.14.19.45]	255
fig|1029756.3.peg.1663 (72)			40	K00169	1
fig|1029756.3.peg.1664 (497)	K11927	rhlE; ATP-dependent RNA helicase RhlE [EC:3.6.4.13]	231
fig|1029756.3.peg.1665 (197)			118
fig|1029756.3.peg.1666 (71)	K03704	cspA; cold shock protein (beta-ribbon, CspA family)	51
fig|1029756.3.peg.1667 (258)			103
fig|1029756.3.peg.1668 (380)			138
fig|1029756.3.peg.1669 (245)			82
fig|1029756.3.peg.1670 (168)			82
fig|1029756.3.peg.1671 (166)
fig|1029756.3.peg.1672 (546)	K01937	pyrG; CTP synthase [EC:6.3.4.2]	631
fig|1029756.3.peg.1673 (162)			10	K00666	1
fig|1029756.3.peg.1674 (118)	K03075	secG; preprotein translocase subunit SecG	46
fig|1029756.3.peg.1675 (139)			12	K03978	1
fig|1029756.3.peg.1676 (254)	K01803	TPI; triosephosphate isomerase (TIM) [EC:5.3.1.1]	301
fig|1029756.3.peg.1677 (633)	K03770	ppiD; peptidyl-prolyl cis-trans isomerase D [EC:5.2.1.8]	270
fig|1029756.3.peg.1678 (517)	K01657	trpE; anthranilate synthase component I [EC:4.1.3.27]	444
fig|1029756.3.peg.1679 (99)			19	K22014	3
fig|1029756.3.peg.1680 (632)			17	K13735	1
fig|1029756.3.peg.1681 (262)	K01092	E3.1.3.25; myo-inositol-1(or 4)-monophosphatase [EC:3.1.3.25]	251
fig|1029756.3.peg.1682 (333)	K07126	uncharacterized protein	122
fig|1029756.3.peg.1683 (218)	K00788	thiE; thiamine-phosphate pyrophosphorylase [EC:2.5.1.3]	54
fig|1029756.3.peg.1684 (39)			2	K00606	1
fig|1029756.3.peg.1685 (774)	K21470	ycbB; L,D-transpeptidase YcbB	163
fig|1029756.3.peg.1686 (344)	K01623	ALDO; fructose-bisphosphate aldolase, class I [EC:4.1.2.13]	504
fig|1029756.3.peg.1687 (249)			255
fig|1029756.3.peg.1688 (274)	K09769	uncharacterized protein	275
fig|1029756.3.peg.1689 (212)	K01934	MTHFS; 5-formyltetrahydrofolate cyclo-ligase [EC:6.3.3.2]	119
fig|1029756.3.peg.1690 (115)			4	K07497	1
fig|1029756.3.peg.1691 (335)	K00134	GAPDH; glyceraldehyde 3-phosphate dehydrogenase [EC:1.2.1.12]	416
fig|1029756.3.peg.1692 (115)
fig|1029756.3.peg.1693 (97)			15
fig|1029756.3.peg.1694 (180)			80
fig|1029756.3.peg.1695 (221)	K01159	ruvC; crossover junction endodeoxyribonuclease RuvC [EC:3.1.22.4]	107
fig|1029756.3.peg.1696 (156)			9	K20373	1
fig|1029756.3.peg.1697 (83)			2	K02340	1
fig|1029756.3.peg.1698 (167)	K06140	rnk; regulator of nucleoside diphosphate kinase	15
fig|1029756.3.peg.1699 (346)	K03551	ruvB; holliday junction DNA helicase RuvB [EC:3.6.4.12]	357
fig|1029756.3.peg.1700 (307)	K07098	uncharacterized protein	259
fig|1029756.3.peg.1701 (194)	K07107	ybgC; acyl-CoA thioester hydrolase [EC:3.1.2.-]	58
fig|1029756.3.peg.1702 (222)	K01673	cynT; carbonic anhydrase [EC:4.2.1.1]	89
fig|1029756.3.peg.1703 (47)			1
fig|1029756.3.peg.1704 (237)	K03562	tolQ; biopolymer transport protein TolQ	223
fig|1029756.3.peg.1705 (156)	K03560	tolR; biopolymer transport protein TolR	129
fig|1029756.3.peg.1706 (358)			17	K03646	2
fig|1029756.3.peg.1707 (518)	K03641	tolB; TolB protein	271
fig|1029756.3.peg.1708 (44)			16
fig|1029756.3.peg.1709 (40)			10
fig|1029756.3.peg.1710 (43)			2	K04116	1
fig|1029756.3.peg.1711 (125)	K03640	pal; peptidoglycan-associated lipoprotein	92
fig|1029756.3.peg.1712 (320)	K03640	pal; peptidoglycan-associated lipoprotein	11
fig|1029756.3.peg.1713 (329)			57
fig|1029756.3.peg.1714 (467)	K04075	tilS; tRNA(Ile)-lysidine synthase [EC:6.3.4.19]	134
fig|1029756.3.peg.1715 (643)	K03798	ftsH; cell division protease FtsH [EC:3.4.24.-]	641
fig|1029756.3.peg.1716 (368)	K00796	folP; dihydropteroate synthase [EC:2.5.1.15]	290
fig|1029756.3.peg.1717 (450)	K03431	glmM; phosphoglucosamine mutase [EC:5.4.2.10]	471
fig|1029756.3.peg.1718 (277)			79
fig|1029756.3.peg.1719 (564)			200
fig|1029756.3.peg.1720 (430)	K01939	purA; adenylosuccinate synthase [EC:6.3.4.4]	660
fig|1029756.3.peg.1721 (167)			94
fig|1029756.3.peg.1722 (152)			104
fig|1029756.3.peg.1723 (303)			168
fig|1029756.3.peg.1724 (364)	K07001	NTE family protein	242
fig|1029756.3.peg.1725 (258)			51	K15773	1
fig|1029756.3.peg.1726 (195)	K03642	rlpA; rare lipoprotein A	21
fig|1029756.3.peg.1727 (433)	K07240	chrA; chromate transporter	308
fig|1029756.3.peg.1728 (95)			7	K09978	1
fig|1029756.3.peg.1729 (152)			42
fig|1029756.3.peg.1730 (133)			115
fig|1029756.3.peg.1731 (122)	K14475	ICP; inhibitor of cysteine peptidase	13
fig|1029756.3.peg.1732 (107)			2	K14475	2
fig|1029756.3.peg.1733 (38)
fig|1029756.3.peg.1734 (375)	K10680	nemA; N-ethylmaleimide reductase [EC:1.-.-.-]	347
fig|1029756.3.peg.1735 (49)
fig|1029756.3.peg.1736 (196)	K00432	gpx; glutathione peroxidase [EC:1.11.1.9]	113
fig|1029756.3.peg.1737 (142)			5	K03924	1
fig|1029756.3.peg.1738 (111)			17	K01868	1
fig|1029756.3.peg.1739 (643)	K03147	thiC; phosphomethylpyrimidine synthase [EC:4.1.99.17]	695
fig|1029756.3.peg.1740 (80)			3	K16264	1
fig|1029756.3.peg.1741 (40)			4	K01733	1
fig|1029756.3.peg.1742 (88)			5	K01533	1
fig|1029756.3.peg.1743 (110)			10	K01990	1
fig|1029756.3.peg.1744 (255)			73
fig|1029756.3.peg.1745 (913)	K03466	ftsK; DNA segregation ATPase FtsK/SpoIIIE, S-DNA-T family	432
fig|1029756.3.peg.1746 (406)			252
fig|1029756.3.peg.1747 (120)			10	K02019	1
fig|1029756.3.peg.1748 (323)			28	K15352	1
fig|1029756.3.peg.1749 (285)			38
fig|1029756.3.peg.1750 (536)	K01649	leuA; 2-isopropylmalate synthase [EC:2.3.3.13]	741
fig|1029756.3.peg.1751 (167)	K03830	yafP; putative acetyltransferase [EC:2.3.1.-]	108
fig|1029756.3.peg.1752 (43)			4	K03793	1
fig|1029756.3.peg.1753 (473)	K01883	CARS; cysteinyl-tRNA synthetase [EC:6.1.1.16]	413
fig|1029756.3.peg.1754 (367)			107
fig|1029756.3.peg.1755 (460)	K01885	EARS; glutamyl-tRNA synthetase [EC:6.1.1.17]	374
fig|1029756.3.peg.1756 (325)			32	K02533	1
fig|1029756.3.peg.1757 (671)	K01965	PCCA; propionyl-CoA carboxylase alpha chain [EC:6.4.1.3]	688
fig|1029756.3.peg.1758 (130)			98
fig|1029756.3.peg.1759 (106)	K01512	acyP; acylphosphatase [EC:3.6.1.7]	42
fig|1029756.3.peg.1760 (283)			152
fig|1029756.3.peg.1761 (121)			10	K14259	1
fig|1029756.3.peg.1762 (263)	K03801	lipB; lipoyl(octanoyl) transferase [EC:2.3.1.181]	203
fig|1029756.3.peg.1763 (199)			51
fig|1029756.3.peg.1764 (222)			32
fig|1029756.3.peg.1765 (65)			3
fig|1029756.3.peg.1766 (204)			64
fig|1029756.3.peg.1767 (273)			68
fig|1029756.3.peg.1768 (307)			242
fig|1029756.3.peg.1769 (332)			11	K07165	1
fig|1029756.3.peg.1770 (732)	K01768	E4.6.1.1; adenylate cyclase [EC:4.6.1.1]	468
fig|1029756.3.peg.1771 (252)			10	K07058	1
fig|1029756.3.peg.1772 (455)	K14441	rimO; ribosomal protein S12 methylthiotransferase [EC:2.8.4.4]	398
fig|1029756.3.peg.1773 (273)			8	K21310	1
fig|1029756.3.peg.1774 (1085)			9	K12685	2
fig|1029756.3.peg.1775 (89)			2
fig|1029756.3.peg.1776 (151)			8	K03469	1
fig|1029756.3.peg.1777 (601)	K03821	phbC; polyhydroxyalkanoate synthase subunit PhaC [EC:2.3.1.-]	504
fig|1029756.3.peg.1778 (408)	K14261	alaC; alanine-synthesizing transaminase [EC:2.6.1.-]	623
fig|1029756.3.peg.1779 (444)	K00003	E1.1.1.3; homoserine dehydrogenase [EC:1.1.1.3]	343
fig|1029756.3.peg.1780 (284)	K11532	glpX-SEBP; fructose-1,6-bisphosphatase II / sedoheptulose-1,7-bisphosphatase [EC:3.1.3.11 3.1.3.37]	316
fig|1029756.3.peg.1781 (39)
fig|1029756.3.peg.1782 (43)			9	K01993	1
fig|1029756.3.peg.1783 (620)	K07462	recJ; single-stranded-DNA-specific exonuclease [EC:3.1.-.-]	435
fig|1029756.3.peg.1784 (67)
fig|1029756.3.peg.1785 (248)	K01233	csn; chitosanase [EC:3.2.1.132]	63
fig|1029756.3.peg.1786 (55)
fig|1029756.3.peg.1787 (41)
fig|1029756.3.peg.1788 (136)			14	K07219	1
fig|1029756.3.peg.1789 (747)	K02014	TC.FEV.OM; iron complex outermembrane recepter protein	400
fig|1029756.3.peg.1790 (116)	K06193	phnA; protein PhnA	79
fig|1029756.3.peg.1791 (692)	K05592	deaD; ATP-dependent RNA helicase DeaD [EC:3.6.4.13]	361
fig|1029756.3.peg.1792 (1149)	K05802	mscK; potassium-dependent mechanosensitive channel	220
fig|1029756.3.peg.1793 (102)			3	K21672	1
fig|1029756.3.peg.1794 (166)	K00799	GST; glutathione S-transferase [EC:2.5.1.18]	62
fig|1029756.3.peg.1795 (239)			157
fig|1029756.3.peg.1796 (175)	K02231	cobP; adenosylcobinamide kinase / adenosylcobinamide-phosphate guanylyltransferase [EC:2.7.1.156 2.7.7.62]	127
fig|1029756.3.peg.1797 (387)	K02227	cbiB; adenosylcobinamide-phosphate synthase [EC:6.3.1.10]	195
fig|1029756.3.peg.1798 (246)	K02233	E2.7.8.26; adenosylcobinamide-GDP ribazoletransferase [EC:2.7.8.26]	146
fig|1029756.3.peg.1799 (198)	K02226	cobC; alpha-ribazole phosphatase [EC:3.1.3.73]	117
fig|1029756.3.peg.1800 (366)	K00768	E2.4.2.21; nicotinate-nucleotide--dimethylbenzimidazole phosphoribosyltransferase [EC:2.4.2.21]	177
fig|1029756.3.peg.1801 (195)	K07141	mocA; molybdenum cofactor cytidylyltransferase [EC:2.7.7.76]	42
fig|1029756.3.peg.1802 (175)			51
fig|1029756.3.peg.1803 (271)	K00528	fpr; ferredoxin/flavodoxin---NADP+ reductase [EC:1.18.1.2 1.19.1.1]	182
fig|1029756.3.peg.1804 (225)	K01420	fnr; CRP/FNR family transcriptional regulator, anaerobic regulatory protein	17
fig|1029756.3.peg.1805 (508)	K03306	TC.PIT; inorganic phosphate transporter, PiT family	457
fig|1029756.3.peg.1806 (753)			170	K13924	9
fig|1029756.3.peg.1807 (145)			78
fig|1029756.3.peg.1808 (124)	K09790	uncharacterized protein	20
fig|1029756.3.peg.1809 (93)			15	K00627	1
fig|1029756.3.peg.1810 (123)			109
fig|1029756.3.peg.1811 (419)	K03088	rpoE; RNA polymerase sigma-70 factor, ECF subfamily	363
fig|1029756.3.peg.1812 (185)			73
fig|1029756.3.peg.1813 (359)			297
fig|1029756.3.peg.1814 (107)	K03636	moaD; sulfur-carrier protein	21
fig|1029756.3.peg.1815 (403)			26	K03106	1
fig|1029756.3.peg.1816 (668)			218
fig|1029756.3.peg.1817 (248)	K01992	ABC-2.P; ABC-2 type transport system permease protein	151
fig|1029756.3.peg.1818 (316)	K01990	ABC-2.A; ABC-2 type transport system ATP-binding protein	175
fig|1029756.3.peg.1819 (259)			12	K01499	1
fig|1029756.3.peg.1820 (87)			1	K02230	1
fig|1029756.3.peg.1821 (86)			3	K02874	1
fig|1029756.3.peg.1822 (301)	K11604	sitA; manganese/iron transport system substrate-binding protein	252
fig|1029756.3.peg.1823 (305)	K11607	sitB; manganese/iron transport system ATP-binding protein	230
fig|1029756.3.peg.1824 (283)	K11605	sitC; manganese/iron transport system permease protein	324
fig|1029756.3.peg.1825 (287)	K11606	sitD; manganese/iron transport system permease protein	221
fig|1029756.3.peg.1826 (136)			68
fig|1029756.3.peg.1827 (143)			1	K07025	1
fig|1029756.3.peg.1828 (701)			54
fig|1029756.3.peg.1829 (424)			7	K06946	1
fig|1029756.3.peg.1830 (246)	K00570	pmtA; phosphatidylethanolamine/phosphatidyl-N-methylethanolamine N-methyltransferase [EC:2.1.1.17 2.1.1.71]	119
fig|1029756.3.peg.1831 (385)	K00566	mnmA; tRNA-uridine 2-sulfurtransferase [EC:2.8.1.13]	313
fig|1029756.3.peg.1832 (83)			96
fig|1029756.3.peg.1833 (197)			19	K13628	1
fig|1029756.3.peg.1834 (50)
fig|1029756.3.peg.1835 (127)			55
fig|1029756.3.peg.1836 (231)	K13584	ctrA; two-component system, cell cycle response regulator CtrA	293
fig|1029756.3.peg.1837 (53)			1	K21003	1
fig|1029756.3.peg.1838 (530)			60
fig|1029756.3.peg.1839 (281)			10	K03597	1
fig|1029756.3.peg.1840 (180)	K03088	rpoE; RNA polymerase sigma-70 factor, ECF subfamily	73
fig|1029756.3.peg.1841 (218)	K01069	gloB; hydroxyacylglutathione hydrolase [EC:3.1.2.6]	219
fig|1029756.3.peg.1842 (127)			9	K00252	1
fig|1029756.3.peg.1843 (162)			36	K00989	1
fig|1029756.3.peg.1844 (171)			27	K00645	1
fig|1029756.3.peg.1845 (102)			5	K11177	1
fig|1029756.3.peg.1846 (159)			119
fig|1029756.3.peg.1847 (491)			102
fig|1029756.3.peg.1848 (49)			1	K02347	1
fig|1029756.3.peg.1849 (192)	K05520	pfpI; protease I [EC:3.5.1.124]	171
fig|1029756.3.peg.1850 (481)	K03406	mcp; methyl-accepting chemotaxis protein	176
fig|1029756.3.peg.1851 (242)			62
fig|1029756.3.peg.1852 (227)			12	K01462	1
fig|1029756.3.peg.1853 (77)
fig|1029756.3.peg.1854 (974)	K03702	uvrB; excinuclease ABC subunit B	643
fig|1029756.3.peg.1855 (100)			10	K02028/K02029	1
fig|1029756.3.peg.1856 (106)
fig|1029756.3.peg.1857 (238)			138
fig|1029756.3.peg.1858 (59)			14	K12141	1
fig|1029756.3.peg.1859 (185)			20	K07011	2
fig|1029756.3.peg.1860 (101)			2	K02004	1
fig|1029756.3.peg.1861 (441)	K00812	aspB; aspartate aminotransferase [EC:2.6.1.1]	367
fig|1029756.3.peg.1862 (239)			103
fig|1029756.3.peg.1863 (146)			68
fig|1029756.3.peg.1864 (67)			1	K01814	1
fig|1029756.3.peg.1865 (694)	K02355	fusA; elongation factor G	584
fig|1029756.3.peg.1866 (127)	K07305	msrB; peptide-methionine (R)-S-oxide reductase [EC:1.8.4.12]	82
fig|1029756.3.peg.1867 (240)	K06206	sfsA; sugar fermentation stimulation protein A	254
fig|1029756.3.peg.1868 (39)			2	K08289	1
fig|1029756.3.peg.1869 (247)			233
fig|1029756.3.peg.1870 (379)
fig|1029756.3.peg.1871 (192)			31	K08194	1
fig|1029756.3.peg.1872 (111)
fig|1029756.3.peg.1873 (84)
fig|1029756.3.peg.1874 (1321)	K00525	E1.17.4.1A; ribonucleoside-diphosphate reductase alpha chain [EC:1.17.4.1]	1163
fig|1029756.3.peg.1875 (57)
fig|1029756.3.peg.1876 (135)			155
fig|1029756.3.peg.1877 (196)			76
fig|1029756.3.peg.1878 (88)
fig|1029756.3.peg.1879 (341)	K01698	hemB; porphobilinogen synthase [EC:4.2.1.24]	398
fig|1029756.3.peg.1880 (465)			11
fig|1029756.3.peg.1881 (362)	K01692	paaF; enoyl-CoA hydratase [EC:4.2.1.17]	91
fig|1029756.3.peg.1882 (170)			144
fig|1029756.3.peg.1883 (45)
fig|1029756.3.peg.1884 (423)	K21470	ycbB; L,D-transpeptidase YcbB	216
fig|1029756.3.peg.1885 (411)	K00643	E2.3.1.37; 5-aminolevulinate synthase [EC:2.3.1.37]	391
fig|1029756.3.peg.1886 (427)	K00600	glyA; glycine hydroxymethyltransferase [EC:2.1.2.1]	453
fig|1029756.3.peg.1887 (151)	K07738	nrdR; transcriptional repressor NrdR	126
fig|1029756.3.peg.1888 (362)	K11752	ribD; diaminohydroxyphosphoribosylaminopyrimidine deaminase / 5-amino-6-(5-phosphoribosylamino)uracil reductase [EC:3.5.4.26 1.1.1.193]	184
fig|1029756.3.peg.1889 (197)	K00793	ribE; riboflavin synthase [EC:2.5.1.9]	210
fig|1029756.3.peg.1890 (381)	K14652	ribBA; 3,4-dihydroxy 2-butanone 4-phosphate synthase / GTP cyclohydrolase II [EC:4.1.99.12 3.5.4.25]	404
fig|1029756.3.peg.1891 (170)	K00794	ribH; 6,7-dimethyl-8-ribityllumazine synthase [EC:2.5.1.78]	115
fig|1029756.3.peg.1892 (175)	K03625	nusB; N utilization substance protein B	123
fig|1029756.3.peg.1893 (335)	K00946	thiL; thiamine-monophosphate kinase [EC:2.7.4.16]	228
fig|1029756.3.peg.1894 (462)	K21470	ycbB; L,D-transpeptidase YcbB	145
fig|1029756.3.peg.1895 (216)			2	K05896	1
fig|1029756.3.peg.1896 (253)	K01992	ABC-2.P; ABC-2 type transport system permease protein	234
fig|1029756.3.peg.1897 (310)	K01990	ABC-2.A; ABC-2 type transport system ATP-binding protein	260
fig|1029756.3.peg.1898 (399)			5
fig|1029756.3.peg.1899 (99)			2	K01733	1
fig|1029756.3.peg.1900 (80)			3	K07082	1
fig|1029756.3.peg.1901 (110)			59
fig|1029756.3.peg.1902 (156)			78
fig|1029756.3.peg.1903 (377)	K00526	E1.17.4.1B; ribonucleoside-diphosphate reductase beta chain [EC:1.17.4.1]	442
fig|1029756.3.peg.1904 (957)	K00525	E1.17.4.1A; ribonucleoside-diphosphate reductase alpha chain [EC:1.17.4.1]	991
fig|1029756.3.peg.1905 (163)	K02553	rraA; regulator of ribonuclease activity A	63
fig|1029756.3.peg.1906 (467)	K21686	prpR; XRE family transcriptional regulator, fatty acid utilization regulator	396
fig|1029756.3.peg.1907 (479)	K01637	E4.1.3.1; isocitrate lyase [EC:4.1.3.1]	541
fig|1029756.3.peg.1908 (84)			19	K02796	1
fig|1029756.3.peg.1909 (130)			64
fig|1029756.3.peg.1910 (786)	K00549	metE; 5-methyltetrahydropteroyltriglutamate--homocysteine methyltransferase [EC:2.1.1.14]	633
fig|1029756.3.peg.1911 (47)			1
fig|1029756.3.peg.1912 (528)	K14393	actP; cation/acetate symporter	430
fig|1029756.3.peg.1913 (105)			42
fig|1029756.3.peg.1914 (130)			53
fig|1029756.3.peg.1915 (221)	K00573	E2.1.1.77; protein-L-isoaspartate(D-aspartate) O-methyltransferase [EC:2.1.1.77]	143
fig|1029756.3.peg.1916 (482)	K12340	tolC; outer membrane protein	239
fig|1029756.3.peg.1917 (320)
fig|1029756.3.peg.1918 (482)
fig|1029756.3.peg.1919 (937)	K01873	VARS; valyl-tRNA synthetase [EC:6.1.1.9]	861
fig|1029756.3.peg.1920 (201)			14	K02463	1
fig|1029756.3.peg.1921 (61)
fig|1029756.3.peg.1922 (574)	K01687	ilvD; dihydroxy-acid dehydratase [EC:4.2.1.9]	901
fig|1029756.3.peg.1923 (328)	K07126	uncharacterized protein	63
fig|1029756.3.peg.1924 (259)	K01142	E3.1.11.2; exodeoxyribonuclease III [EC:3.1.11.2]	359
fig|1029756.3.peg.1925 (113)			142
fig|1029756.3.peg.1926 (412)	K01129	dgt; dGTPase [EC:3.1.5.1]	285
fig|1029756.3.peg.1927 (604)	K01887	RARS; arginyl-tRNA synthetase [EC:6.1.1.19]	507
fig|1029756.3.peg.1928 (141)			1	K09800	1
fig|1029756.3.peg.1929 (378)			5
fig|1029756.3.peg.1930 (183)			9	K03749	1
fig|1029756.3.peg.1931 (344)	K01207	nagZ; beta-N-acetylhexosaminidase [EC:3.2.1.52]	307
fig|1029756.3.peg.1932 (297)	K05896	scpA; segregation and condensation protein A	151
fig|1029756.3.peg.1933 (302)	K06024	scpB; segregation and condensation protein B	130
fig|1029756.3.peg.1934 (387)	K02010	afuC; iron(III) transport system ATP-binding protein [EC:3.6.3.30]	280
fig|1029756.3.peg.1935 (74)	K03116	tatA; sec-independent protein translocase protein TatA	41
fig|1029756.3.peg.1936 (187)	K03117	tatB; sec-independent protein translocase protein TatB	23
fig|1029756.3.peg.1937 (271)	K03118	tatC; sec-independent protein translocase protein TatC	292
fig|1029756.3.peg.1938 (428)	K01875	SARS; seryl-tRNA synthetase [EC:6.1.1.11]	420
fig|1029756.3.peg.1939 (264)	K03787	surE; 5'-nucleotidase [EC:3.1.3.5]	268
fig|1029756.3.peg.1940 (512)			101
fig|1029756.3.peg.1941 (303)	K06923	uncharacterized protein	260
fig|1029756.3.peg.1942 (113)	K03210	yajC; preprotein translocase subunit YajC	79
fig|1029756.3.peg.1943 (545)	K03072	secD; preprotein translocase subunit SecD	342	K12257	23
fig|1029756.3.peg.1944 (318)	K03074	secF; preprotein translocase subunit SecF	133	K12257	15
fig|1029756.3.peg.1945 (124)			123
fig|1029756.3.peg.1946 (288)	K02291	crtB; 15-cis-phytoene synthase [EC:2.5.1.32]	106
fig|1029756.3.peg.1947 (702)			175
fig|1029756.3.peg.1948 (616)	K06147	ABCB-BAC; ATP-binding cassette, subfamily B, bacterial	439
fig|1029756.3.peg.1949 (74)	K02909	RP-L31; large subunit ribosomal protein L31	110
fig|1029756.3.peg.1950 (172)	K13592	rcdA; regulator of CtrA degradation	131
fig|1029756.3.peg.1951 (434)	K03699	tlyC; putative hemolysin	312
fig|1029756.3.peg.1952 (65)			26
fig|1029756.3.peg.1953 (333)			259	K00344	31
fig|1029756.3.peg.1954 (290)			179
fig|1029756.3.peg.1955 (570)	K13593	tipF; cyclic-di-GMP phosphodiesterase, flagellum assembly factor TipF	52
fig|1029756.3.peg.1956 (249)			11	K00059	10
fig|1029756.3.peg.1957 (1023)	K18138	acrB; multidrug efflux pump	1121
fig|1029756.3.peg.1958 (380)	K03585	acrA; membrane fusion protein, multidrug efflux system	152
fig|1029756.3.peg.1959 (324)			109
fig|1029756.3.peg.1960 (367)			117
fig|1029756.3.peg.1961 (458)	K06213	mgtE; magnesium transporter	310
fig|1029756.3.peg.1962 (230)	K07507	mgtC; putative Mg2+ transporter-C (MgtC) family protein	136
fig|1029756.3.peg.1963 (450)			48	K01772	1
fig|1029756.3.peg.1964 (66)
fig|1029756.3.peg.1965 (233)			44	K02557	1
fig|1029756.3.peg.1966 (170)			40
fig|1029756.3.peg.1967 (98)			6	K01448	1
fig|1029756.3.peg.1968 (267)			194
fig|1029756.3.peg.1969 (181)			16
fig|1029756.3.peg.1970 (159)			23	K07140	1
fig|1029756.3.peg.1971 (146)			147
fig|1029756.3.peg.1972 (373)	K00817	hisC; histidinol-phosphate aminotransferase [EC:2.6.1.9]	319
fig|1029756.3.peg.1973 (131)			10	K03832	1
fig|1029756.3.peg.1974 (268)			121
fig|1029756.3.peg.1975 (102)			4	K00851	2
fig|1029756.3.peg.1976 (468)	K01915	glnA; glutamine synthetase [EC:6.3.1.2]	784
fig|1029756.3.peg.1977 (112)	K04751	glnB; nitrogen regulatory protein P-II 1	140
fig|1029756.3.peg.1978 (107)
fig|1029756.3.peg.1979 (501)			325
fig|1029756.3.peg.1980 (655)			62
fig|1029756.3.peg.1981 (141)			99
fig|1029756.3.peg.1982 (312)			30
fig|1029756.3.peg.1983 (511)			21
fig|1029756.3.peg.1984 (308)			155
fig|1029756.3.peg.1985 (117)			68
fig|1029756.3.peg.1986 (83)			10	K03413	1
fig|1029756.3.peg.1987 (469)			3	K03286	1
fig|1029756.3.peg.1988 (245)			9	K22232	1
fig|1029756.3.peg.1989 (39)				K12685	0
fig|1029756.3.peg.1990 (121)			8	K06167	1
fig|1029756.3.peg.1991 (272)			317
fig|1029756.3.peg.1992 (511)	K08167	smvA; MFS transporter, DHA2 family, multidrug resistance protein	245
fig|1029756.3.peg.1993 (147)			30	K03772	30
fig|1029756.3.peg.1994 (268)			5	K00616	1
fig|1029756.3.peg.1995 (87)			2	K04763	1
fig|1029756.3.peg.1996 (162)			164
fig|1029756.3.peg.1997 (97)			5	K01999	1
fig|1029756.3.peg.1998 (49)			13	K02418	1
fig|1029756.3.peg.1999 (78)			5	K16444	1
[truncated: 1,550 more rows]

## Sheet: KEGG metabolisms
										Ratio Biofilm/pure cult		Ratio -(pure cult/biofilm)
										2-5.	>5	;-2-5	>-5	Total
09100 Metabolism									Carbohydrate metabolism	15	6	30	11	157
09101 Carbohydrate metabolism									Energy metabolism	43	16	19	17	176
00010 Glycolysis / Gluconeogenesis [PATH:ko00010]									Nitrogen metabolism	12	19	4	2	59
00020 Citrate cycle (TCA cycle) [PATH:ko00020]									Lipid metabolism	9	1	8	4	54
00030 Pentose phosphate pathway [PATH:ko00030]									Nucleotide metabolism	6	3	12	4	66
00040 Pentose and glucuronate interconversions [PATH:ko00040]									Amino acid metabolism	10	4	45	11	186
00051 Fructose and mannose metabolism [PATH:ko00051]									Glycan biosynthesis and metabolism	0	1	8	1	28
00052 Galactose metabolism [PATH:ko00052]									Metabolism of cofactors and vitamins	18	1	47	14	158
00053 Ascorbate and aldarate metabolism [PATH:ko00053]									Genetic Information Processing	39	1	35	10	177
00500 Starch and sucrose metabolism [PATH:ko00500]									Environmental Information Processing	19	8	32	22	175
									Cellular community	6	0	12	5	86
									All genes	246	63	1019	564	3600
									intergenic sequences	65	12	403	337	1253
00520 Amino sugar and nucleotide sugar metabolism [PATH:ko00520]									Percentage
00620 Pyruvate metabolism [PATH:ko00620]										Ratio Biofilm/pure cult		Ratio -(pure cult/biofilm)
00630 Glyoxylate and dicarboxylate metabolism [PATH:ko00630]										2-5.	>5	;-2-5	>-5	Total
00640 Propanoate metabolism [PATH:ko00640]									All genes (3600)	6.83333	1.75	28.3056	15.6667	3600
00650 Butanoate metabolism [PATH:ko00650]									intergenic sequences (1253)	5.18755	0.957702	32.1628	26.8955	1253
00660 C5-Branched dibasic acid metabolism [PATH:ko00660]					TPM		Biofilm/pure cultures		Carbohydrate metabolism (157)	9.55414	3.82166	19.1083	7.00637	157
00562 Inositol phosphate metabolism [PATH:ko00562]					0%NaCl	Pure cultures			Energy metabolism (176)	24.4318	9.09091	10.7955	9.65909	176
	peg.1907	K01637	isocitrate lyase [EC:4.1.3.1]	E4.1.3.1, aceA	805.842	31.7513	25.3798		Nitrogen metabolism (59)	20.339	32.2034	6.77966	3.38983	22
	peg.1976	K01915	glutamine synthetase [EC:6.3.1.2]	glnA, GLUL	1385.18	74.9914	18.4712		Iron transport (31)	3.22581	6.45161	12.9032	25.8065	31
	peg.3208	K00830	alanine-glyoxylate transaminase / serine-glyoxylate transaminase / serine-pyruvate transaminase [EC:2.6.1.44 2.6.1.45 2.6.1.51]	AGXT	688.29	104.794	6.56805		Lipid metabolism (54)	16.6667	1.85185	14.8148	7.40741	54
	peg.2590	K00127	formate dehydrogenase subunit gamma	fdoI, fdsG	466.517	74.8266	6.23464		Nucleotide metabolism (66)	9.09091	4.54545	18.1818	6.06061	66
	peg.602	K00023	acetoacetyl-CoA reductase [EC:1.1.1.36]	phbB	617.507	108.013	5.71697		Amino acid metabolism (186)	5.37634	2.15054	24.1935	5.91398	186
	peg.2589	K00124	formate dehydrogenase iron-sulfur subunit	fdoH, fdsB	499.118	88.8249	5.61912		Glycan biosynthesis and metabolism (28)	0	3.57143	28.5714	3.57143	28
	peg.2211	K01689	enolase [EC:4.2.1.11]	ENO, eno	150.806	38.4777	3.91931		Metabolism of cofactors and vitamins (158)	11.3924	0.632911	29.7468	8.86076	158
	peg.368	K01681	aconitate hydratase [EC:4.2.1.3]	ACO, acnA	205.324	53.9753	3.80403		Genetic Information Processing (177)	22.0339	0.564972	19.774	5.64972	177
	peg.2158	K01026	propionate CoA-transferase [EC:2.8.3.1]	pct	135.112	36.9006	3.66151		Environmental Information Processing (175)	10.8571	4.57143	18.2857	12.5714	175
	peg.1886	K00600	glycine hydroxymethyltransferase [EC:2.1.2.1]	glyA, SHMT	278.796	78.193	3.56549		Cellular community (86)	6.97674	0	13.9535	5.81395	86
	peg.2588	K00123	formate dehydrogenase major subunit [EC:1.17.1.9]	fdoG, fdhF, fdwA	703.956	235.42	2.99021
	peg.3210	K14067	malate-CoA ligase subunit beta [EC:6.2.1.9]	mtkA	261.975	87.7912	2.98407
	peg.2742	K01652	acetolactate synthase I/II/III large subunit [EC:2.2.1.6]	E2.2.1.6L, ilvB, ilvG, ilvI	137.026	49.3338	2.77752
	peg.603	K00626	acetyl-CoA C-acetyltransferase [EC:2.3.1.9]	E2.3.1.9, atoB	415.623	151.813	2.73773
	peg.467	K01903	succinyl-CoA synthetase beta subunit [EC:6.2.1.5]	sucC	260.471	97.7646	2.66426
	peg.2270	K01647	citrate synthase [EC:2.3.3.1]	CS, gltA	177.151	68.765	2.57618
	peg.3533	K14446	crotonyl-CoA carboxylase/reductase [EC:1.3.1.85]	ccr	229.956	92.9805	2.47317
	peg.2954	K14029	methanol dehydrogenase (cytochrome c) subunit 2 [EC:1.1.2.7]	mdh2, mxaI	10910.6	4657.37	2.34264
	peg.267	K03821	polyhydroxyalkanoate synthase subunit PhaC [EC:2.3.1.-]	phbC, phaC	98.7374	46.6791	2.11524
	peg.1691	K00134	glyceraldehyde 3-phosphate dehydrogenase [EC:1.2.1.12]	GAPDH, gapA	100.388	48.6348	2.06411
	peg.500	K00074	3-hydroxybutyryl-CoA dehydrogenase [EC:1.1.1.157]	paaH, hbd, fadB, mmgB	211.161	104.269	2.02516
	peg.3211	K08692	malate-CoA ligase subunit alpha [EC:6.2.1.9]	mtkB	210.153	112.041	1.87568
	peg.1283	K00015	glyoxylate reductase [EC:1.1.1.26]	gyaR, GOR1	94.5119	50.5166	1.87091
	peg.2957	K14028	methanol dehydrogenase (cytochrome c) subunit 1 [EC:1.1.2.7]	mdh1, mxaF	8788.35	4744.23	1.85243
	peg.205	K01966	propionyl-CoA carboxylase beta chain [EC:6.4.1.3 2.1.3.15]	PCCB, pccB	113.042	62.9661	1.79529
	peg.401	K01834	2,3-bisphosphoglycerate-dependent phosphoglycerate mutase [EC:5.4.2.11]	PGAM, gpmA	142.634	80.1865	1.77878
	peg.468	K01902	succinyl-CoA synthetase alpha subunit [EC:6.2.1.5]	sucD	265.391	152.668	1.73835
	peg.462	K00240	succinate dehydrogenase / fumarate reductase, iron-sulfur subunit [EC:1.3.5.1 1.3.5.4]	sdhB, frdB	138.995	80.7353	1.72161
	peg.3531	K14448	(2S)-methylsuccinyl-CoA dehydrogenase [EC:1.3.8.12]	mcd	69.7425	41.2687	1.68996
	peg.3535	K14447	ethylmalonyl-CoA mutase [EC:5.4.99.63]	ecm	71.8411	42.5303	1.68917
	peg.3114	K00873	pyruvate kinase [EC:2.7.1.40]	PK, pyk	77.0844	46.8015	1.64705
	peg.653	K00830	alanine-glyoxylate transaminase / serine-glyoxylate transaminase / serine-pyruvate transaminase [EC:2.6.1.44 2.6.1.45 2.6.1.51]	AGXT	86.6661	53.1429	1.63081
	peg.2740	K01653	acetolactate synthase I/III small subunit [EC:2.2.1.6]	E2.2.1.6S, ilvH, ilvN	95.854	59.0327	1.62375
	peg.2586	K00126	formate dehydrogenase subunit delta [EC:1.17.1.9]	fdsD	151.017	93.7312	1.61118
	peg.3212	K01595	phosphoenolpyruvate carboxylase [EC:4.1.1.31]	ppc	86.1639	57.1898	1.50663
	peg.1508	K03781	catalase [EC:1.11.1.6]	katE, CAT, catB, srpA	153.056	103.993	1.4718
	peg.189	K00015	glyoxylate reductase [EC:1.1.1.26]	gyaR, GOR1	77.6639	53.8717	1.44165
	peg.1757	K01965	propionyl-CoA carboxylase alpha chain [EC:6.4.1.3]	PCCA, pccA	57.4548	40.7853	1.40872
	peg.2253	K00615	transketolase [EC:2.2.1.1]	E2.2.1.1, tktA, tktB	43.1913	30.7296	1.40553
	peg.1686	K01623	fructose-bisphosphate aldolase, class I [EC:4.1.2.13]	ALDO	110.134	79.6304	1.38307
	peg.1063	K01961	acetyl-CoA carboxylase, biotin carboxylase subunit [EC:6.4.1.2 6.3.4.14]	accC	86.6714	65.9729	1.31374
	peg.466	K00024	malate dehydrogenase [EC:1.1.1.37]	mdh	134.42	103.25	1.3019
	peg.2373	K00031	isocitrate dehydrogenase [EC:1.1.1.42]	IDH1, IDH2, icd	70.3629	54.4509	1.29223
	peg.2072	K01807	ribose 5-phosphate isomerase A [EC:5.3.1.6]	rpiA	71.0934	55.2206	1.28744
	peg.2094	K05973	poly(3-hydroxybutyrate) depolymerase [EC:3.1.1.75]	phaZ	94.7806	76.0172	1.24683
	peg.2093	K08691	malyl-CoA/(S)-citramalyl-CoA lyase [EC:4.1.3.24 4.1.3.25]	mcl	63.3188	50.875	1.24459
	peg.1154	K01704	3-isopropylmalate/(R)-2-methylmalate dehydratase small subunit [EC:4.2.1.33 4.2.1.35]	leuD, IPMI-S	68.5491	56.7999	1.20685
	peg.240	K01895	acetyl-CoA synthetase [EC:6.2.1.1]	ACSS, acs	86.0569	71.8575	1.19761
	peg.1062	K02160	acetyl-CoA carboxylase biotin carboxyl carrier protein	accB, bccP	140.659	118.754	1.18445
	peg.1717	K03431	phosphoglucosamine mutase [EC:5.4.2.10]	glmM	57.3947	48.5473	1.18224
	peg.3495	K01963	acetyl-CoA carboxylase carboxyl transferase subunit beta [EC:6.4.1.2 2.1.3.15]	accD	60.2034	51.5296	1.16833
	peg.130	K01962	acetyl-CoA carboxylase carboxyl transferase subunit alpha [EC:6.4.1.2 2.1.3.15]	accA	73.6154	64.7779	1.13643
	peg.3119	K01092	myo-inositol-1(or 4)-monophosphatase [EC:3.1.3.25]	E3.1.3.25, IMPA, suhB	60.3377	53.643	1.1248
	peg.2252	K00927	phosphoglycerate kinase [EC:2.7.2.3]	PGK, pgk	52.366	47.4269	1.10414
	peg.1157	K00104	glycolate oxidase [EC:1.1.3.15]	glcD	60.8526	55.6024	1.09442
	peg.9	K02793	PTS system, mannose-specific IIA component [EC:2.7.1.191]	PTS-Man-EIIA, manX	65.4453	60.1205	1.08857
	peg.2213	K00161	pyruvate dehydrogenase E1 component alpha subunit [EC:1.2.4.1]	PDHA, pdhA	49.1949	46.2904	1.06275
	peg.2081	K00820	glucosamine---fructose-6-phosphate aminotransferase (isomerizing) [EC:2.6.1.16]	glmS, GFPT	54.9143	51.6767	1.06265
	peg.3238	K05606	methylmalonyl-CoA/ethylmalonyl-CoA epimerase [EC:5.1.99.1]	MCEE, epi	138.378	133.358	1.03764
	peg.541	K13010	perosamine synthetase [EC:2.6.1.102]	per, rfbE	47.5984	46.6882	1.01949
	peg.3484	K00948	ribose-phosphate pyrophosphokinase [EC:2.7.6.1]	PRPS, prsA	47.8421	47.412	1.00907
	peg.355	K14449	2-methylfumaryl-CoA hydratase [EC:4.2.1.148]	mch, mcd	52.8746	53.3707	0.990705
	peg.14	K01596	phosphoenolpyruvate carboxykinase (GTP) [EC:4.1.1.32]	E4.1.1.32, pckA, PCK	45.7187	47.7748	0.956963
	peg.3058	K01847	methylmalonyl-CoA mutase [EC:5.4.99.2]	MUT	45.8021	48.6502	0.941458
	peg.350	K00242	succinate dehydrogenase / fumarate reductase, membrane anchor subunit	sdhD, frdD	43.9636	50.0127	0.879049
	peg.1777	K03821	polyhydroxyalkanoate synthase subunit PhaC [EC:2.3.1.-]	phbC, phaC	70.3825	80.1685	0.877931
	peg.3272	K17865	3-hydroxybutyryl-CoA dehydratase [EC:4.2.1.55]	croR	53.3196	61.6631	0.864691
	peg.1150	K01703	3-isopropylmalate/(R)-2-methylmalate dehydratase large subunit [EC:4.2.1.33 4.2.1.35]	leuC, IPMI-L	101.808	118.274	0.860783
	peg.2797	K01091	phosphoglycolate phosphatase [EC:3.1.3.18]	gph	32.0582	37.7317	0.849636
	peg.599	K01069	hydroxyacylglutathione hydrolase [EC:3.1.2.6]	gloB, gloC, HAGH	51.4434	64.6162	0.796137
	peg.2965	K01784	UDP-glucose 4-epimerase [EC:5.1.3.2]	galE, GALE	53.0204	66.876	0.792816
	peg.1785	K01233	chitosanase [EC:3.2.1.132]	csn	38.1418	48.2632	0.790289
	peg.83	K13017	UDP-2-acetamido-2-deoxy-ribo-hexuluronate aminotransferase [EC:2.6.1.98]	wbpE, wlbC	39.0911	49.4794	0.790049
	peg.141	K05973	poly(3-hydroxybutyrate) depolymerase [EC:3.1.1.75]	phaZ	29.9101	38.0266	0.786557
	peg.3057	K01847	methylmalonyl-CoA mutase [EC:5.4.99.2]	MUT	17.9708	23.2105	0.774256
	peg.3375	K00865	glycerate 2-kinase [EC:2.7.1.165]	glxK, garK	36.1548	46.7897	0.772708
	peg.1841	K01069	hydroxyacylglutathione hydrolase [EC:3.1.2.6]	gloB, gloC, HAGH	50.7351	65.7286	0.771888
	peg.207	K01759	lactoylglutathione lyase [EC:4.4.1.5]	GLO1, gloA	69.2826	90.897	0.76221
	peg.93	K01784	UDP-glucose 4-epimerase [EC:5.1.3.2]	galE, GALE	44.4006	59.178	0.750288
	peg.2330	K00626	acetyl-CoA C-acetyltransferase [EC:2.3.1.9]	E2.3.1.9, atoB	31.9987	43.0847	0.742694
	peg.1644	K00122	formate dehydrogenase [EC:1.17.1.9]	FDH	219.214	296.732	0.738759
	peg.1931	K01207	beta-N-acetylhexosaminidase [EC:3.2.1.52]	nagZ	23.8109	32.5247	0.732085
	peg.2331	K01782	3-hydroxyacyl-CoA dehydrogenase / enoyl-CoA hydratase / 3-hydroxybutyryl-CoA epimerase [EC:1.1.1.35 4.2.1.17 5.1.2.3]	fadJ	39.3137	54.2849	0.724211
	peg.1158	K11472	glycolate oxidase FAD binding subunit	glcE	33.0714	46.105	0.717306
	peg.470	K00164	2-oxoglutarate dehydrogenase E1 component [EC:1.2.4.2]	OGDH, sucA	50.9953	72.1228	0.707062
	peg.2725	K01649	2-isopropylmalate synthase [EC:2.3.3.13]	leuA, IMS	33.5481	47.9804	0.699204
	peg.349	K00239	succinate dehydrogenase / fumarate reductase, flavoprotein subunit [EC:1.3.5.1 1.3.5.4]	sdhA, frdA	33.2725	47.7428	0.696911
	peg.81	K02474	UDP-N-acetyl-D-galactosamine dehydrogenase [EC:1.1.1.-]	wbpO	55.2074	80.5125	0.6857
	peg.351	K00241	succinate dehydrogenase / fumarate reductase, cytochrome b subunit	sdhC, frdC	51.8861	76.7154	0.676346
	peg.2658	K01759	lactoylglutathione lyase [EC:4.4.1.5]	GLO1, gloA	35.6112	52.8153	0.674261
	peg.917	K16011	mannose-1-phosphate guanylyltransferase / mannose-6-phosphate isomerase [EC:2.7.7.13 5.3.1.8]	algA, xanB, rfbA, wbpW, pslB	32.6799	49.1305	0.665166
	peg.1759	K01512	acylphosphatase [EC:3.6.1.7]	acyP	37.1326	57.4917	0.645878
	peg.2054	K00847	fructokinase [EC:2.7.1.4]	E2.7.1.4, scrK	20.2259	31.5011	0.64207
	peg.472	K00382	dihydrolipoamide dehydrogenase [EC:1.8.1.4]	DLD, lpd, pdhD	34.1972	54.4909	0.627576
	peg.151	K01692	enoyl-CoA hydratase [EC:4.2.1.17]	paaF, echA	31.9371	51.0539	0.625557
	peg.100	K08679	UDP-glucuronate 4-epimerase [EC:5.1.3.6]	E5.1.3.6	42.5395	68.0793	0.624852
	peg.3328	K00075	UDP-N-acetylmuramate dehydrogenase [EC:1.3.1.98]	murB	33.5645	54.2403	0.618811
	peg.82	K13020	UDP-N-acetyl-2-amino-2-deoxyglucuronate dehydrogenase [EC:1.1.1.335]	wlbA, bplA	32.0643	51.9854	0.616796
	peg.2920	K00163	pyruvate dehydrogenase E1 component [EC:1.2.4.1]	aceE	32.4424	53.0339	0.611729
	peg.94	K01784	UDP-glucose 4-epimerase [EC:5.1.3.2]	galE, GALE	47.7381	78.5408	0.607813
	peg.2361	K00128	aldehyde dehydrogenase (NAD+) [EC:1.2.1.3]	ALDH	28.144	46.5646	0.604408
	peg.476	K00616	transaldolase [EC:2.2.1.2]	E2.2.1.2, talA, talB	52.5666	86.987	0.604304
	peg.398	K00052	3-isopropylmalate dehydrogenase [EC:1.1.1.85]	leuB, IMDH	28.3411	47.3346	0.59874
	peg.1681	K01092	myo-inositol-1(or 4)-monophosphatase [EC:3.1.3.25]	E3.1.3.25, IMPA, suhB	17.5853	29.5136	0.595838
	peg.1159	K11473	glycolate oxidase iron-sulfur subunit	glcF	24.3587	41.6513	0.584826
	peg.2831	K00012	UDPglucose 6-dehydrogenase [EC:1.1.1.22]	UGDH, ugd	19.6746	33.7493	0.582963
	peg.1750	K01649	2-isopropylmalate synthase [EC:2.3.3.13]	leuA, IMS	23.0403	39.5506	0.582553
	peg.2774	K01652	acetolactate synthase I/II/III large subunit [EC:2.2.1.6]	E2.2.1.6L, ilvB, ilvG, ilvI	25.4025	44.3349	0.572969
	peg.2273	K01915	glutamine synthetase [EC:6.3.1.2]	glnA, GLUL	24.6766	43.3146	0.569705
	peg.1355	K01006	pyruvate, orthophosphate dikinase [EC:2.7.9.1]	ppdK	26.2088	46.2848	0.56625
	peg.471	K00658	2-oxoglutarate dehydrogenase E2 component (dihydrolipoamide succinyltransferase) [EC:2.3.1.61]	DLST, sucB	28.1893	49.8285	0.565726
	peg.2112	K01915	glutamine synthetase [EC:6.3.1.2]	glnA, GLUL	38.1	68.8007	0.553774
	peg.882	K00978	glucose-1-phosphate cytidylyltransferase [EC:2.7.7.33]	rfbF	31.9347	58.9424	0.541795
	peg.50	K00790	UDP-N-acetylglucosamine 1-carboxyvinyltransferase [EC:2.5.1.7]	murA	26.6529	49.4285	0.539221
	peg.2582	K00138	aldehyde dehydrogenase [EC:1.2.1.-]	aldB	211.549	395.138	0.535379
	peg.3282	K01810	glucose-6-phosphate isomerase [EC:5.3.1.9]	GPI, pgi	26.5847	49.793	0.533904
	peg.3185	K01679	fumarate hydratase, class II [EC:4.2.1.2]	E4.2.1.2B, fumC, FH	25.6695	51.4536	0.498887
	peg.3486	K07102	N-acetylmuramate 1-kinase [EC:2.7.1.221]	amgK	15.8579	33.646	0.471317
	peg.2921	K00627	pyruvate dehydrogenase E2 component (dihydrolipoamide acetyltransferase) [EC:2.3.1.12]	DLAT, aceF, pdhC	31.4154	67.66	0.464312
	peg.2214	K00162	pyruvate dehydrogenase E1 component beta subunit [EC:1.2.4.1]	PDHB, pdhB	24.2642	53.618	0.452539
	peg.2424	K15778	phosphomannomutase / phosphoglucomutase [EC:5.4.2.8 5.4.2.2]	pmm-pgm	23.1351	52.248	0.442794
	peg.1676	K01803	triosephosphate isomerase (TIM) [EC:5.3.1.1]	TPI, tpiA	18.6974	43.373	0.431083
	peg.1780	K11532	fructose-1,6-bisphosphatase II / sedoheptulose-1,7-bisphosphatase [EC:3.1.3.11 3.1.3.37]	glpX-SEBP	37.6285	88.8354	0.423576
	peg.1881	K01692	enoyl-CoA hydratase [EC:4.2.1.17]	paaF, echA	18.6072	44.4671	0.418449
	peg.84	K13019	UDP-GlcNAc3NAcA epimerase [EC:5.1.3.23]	wbpI, wlbD	27.6317	66.073	0.4182
	peg.2928	K01087	trehalose 6-phosphate phosphatase [EC:3.1.3.12]	otsB	15.6458	40.999	0.381613
	peg.2106	K00823	4-aminobutyrate aminotransferase [EC:2.6.1.19]	puuE	15.6272	41.7468	0.374332
	peg.2922	K00382	dihydrolipoamide dehydrogenase [EC:1.8.1.4]	DLD, lpd, pdhD	19.0957	52.5472	0.363401
	peg.1198	K03841	fructose-1,6-bisphosphatase I [EC:3.1.3.11]	FBP, fbp	52.5902	155.278	0.338685
	peg.3487	K00992	N-acetyl-alpha-D-muramate 1-phosphate uridylyltransferase [EC:2.7.7.99]	murU	10.9022	33.7828	0.322715
	peg.80	K13018	UDP-2-acetamido-3-amino-2,3-dideoxy-glucuronate N-acetyltransferase [EC:2.3.1.201]	wbpD, wlbB	17.8084	58.6044	0.303875
	peg.1193	K01783	ribulose-phosphate 3-epimerase [EC:5.1.3.1]	rpe, RPE	11.6175	41.2673	0.281519
	peg.2107	K00135	succinate-semialdehyde dehydrogenase / glutarate-semialdehyde dehydrogenase [EC:1.2.1.16 1.2.1.79 1.2.1.20]	gabD	13.7751	49.2264	0.27983
	peg.2108	K01915	glutamine synthetase [EC:6.3.1.2]	glnA, GLUL	14.482	53.0546	0.272963
	peg.2105	K00822	beta-alanine--pyruvate transaminase [EC:2.6.1.18]	E2.6.1.18	11.1433	41.948	0.265646
	peg.2071	K01091	phosphoglycolate phosphatase [EC:3.1.3.18]	gph	12.6227	53.2633	0.236986
	peg.3129	K00963	UTP--glucose-1-phosphate uridylyltransferase [EC:2.7.7.9]	UGP2, galU, galF	15.3399	64.9391	0.236219
	peg.881	K01709	CDP-glucose 4,6-dehydratase [EC:4.2.1.45]	rfbG	11.4691	49.09	0.233635
	peg.3509	K01628	L-fuculose-phosphate aldolase [EC:4.1.2.17]	fucA	9.02243	38.855	0.232208
	peg.2565	K00114	alcohol dehydrogenase (cytochrome c) [EC:1.1.2.8]	exaA	43.467	190.045	0.228719
	peg.2080	K04042	bifunctional UDP-N-acetylglucosamine pyrophosphorylase / Glucosamine-1-phosphate N-acetyltransferase [EC:2.7.7.23 2.3.1.157]	glmU	11.9889	53.7769	0.222937
	peg.279	K00117	quinoprotein glucose dehydrogenase [EC:1.1.5.2]	gcd	14.1639	63.612	0.222661
	peg.2104	K00140	malonate-semialdehyde dehydrogenase (acetylating) / methylmalonate-semialdehyde dehydrogenase [EC:1.2.1.18 1.2.1.27]	mmsA, iolA, ALDH6A1	10.0716	47.0794	0.213928
	peg.941	K00064	D-threo-aldose 1-dehydrogenase [EC:1.1.1.122]	E1.1.1.122	11.5044	55.0686	0.208911
	peg.2926	K00697	trehalose 6-phosphate synthase [EC:2.4.1.15 2.4.1.347]	otsA	15.2736	74.7315	0.20438
	peg.2927	K00852	ribokinase [EC:2.7.1.15]	rbsK, RBKS	6.86547	34.0421	0.201676
	peg.1291	K00102	D-lactate dehydrogenase (cytochrome) [EC:1.1.2.4]	LDHD, dld	8.60095	46.846	0.183601
	peg.2366	K01091	phosphoglycolate phosphatase [EC:3.1.3.18]	gph	4.92894	30.2519	0.16293
	peg.2596	K00029	malate dehydrogenase (oxaloacetate-decarboxylating)(NADP+) [EC:1.1.1.40]	E1.1.1.40, maeB	6.11773	41.8176	0.146296
	peg.2595	K00029	malate dehydrogenase (oxaloacetate-decarboxylating)(NADP+) [EC:1.1.1.40]	E1.1.1.40, maeB	6.5569	47.5258	0.137965
	peg.1416	K00382	dihydrolipoamide dehydrogenase [EC:1.8.1.4]	DLD, lpd, pdhD	3.14184	28.6469	0.109675
	peg.288	K00627	pyruvate dehydrogenase E2 component (dihydrolipoamide acetyltransferase) [EC:2.3.1.12]	DLAT, aceF, pdhC	5.94111	60.3948	0.0983711
	peg.291	K00382	dihydrolipoamide dehydrogenase [EC:1.8.1.4]	DLD, lpd, pdhD	4.1365	47.736	0.0866538
	peg.930	K00626	acetyl-CoA C-acetyltransferase [EC:2.3.1.9]	E2.3.1.9, atoB	3.51126	43.0016	0.0816542
	peg.1428	K07248	lactaldehyde dehydrogenase / glycolaldehyde dehydrogenase [EC:1.2.1.22 1.2.1.21]	aldA	4.24944	62.1567	0.0683665
	peg.1418	K00163	pyruvate dehydrogenase E1 component [EC:1.2.4.1]	aceE	2.23605	42.9968	0.052005
	peg.1417	K00627	pyruvate dehydrogenase E2 component (dihydrolipoamide acetyltransferase) [EC:2.3.1.12]	DLAT, aceF, pdhC	1.53091	51.8061	0.0295507
09102 Energy metabolism
00190 Oxidative phosphorylation [PATH:ko00190]
00195 Photosynthesis [PATH:ko00195]
00710 Carbon fixation in photosynthetic organisms [PATH:ko00710]
00720 Carbon fixation pathways in prokaryotes [PATH:ko00720]
00680 Methane metabolism [PATH:ko00680]
00910 Nitrogen metabolism [PATH:ko00910]
00920 Sulfur metabolism [PATH:ko00920]															TPM		Biofilm/pure cultures
	peg.2652	K00368	nitrite reductase (NO-forming) [EC:1.7.2.1]	nirK	9702.5	177.467	54.6721			00910 Nitrogen metabolism [PATH:ko00910]					0%NaCl	Pure cultures
	peg.1976	K01915	glutamine synthetase [EC:6.3.1.2]	glnA, GLUL	1385.18	74.9914	18.4712			fig|1029756.3	peg.2652	K00368	nitrite reductase (NO-forming) [EC:1.7.2.1]	nirK	9702.5	177.467	54.6721	Copper-containing nitrite reductase (EC 1.7.2.1)
	peg.2822	K02568	cytochrome c-type protein NapB	napB	954.726	77.3948	12.3358			fig|1029756.3	peg.1976	K01915	glutamine synthetase [EC:6.3.1.2]	glnA, GLUL	1385.18	74.9914	18.4712	Glutamine synthetase type I (EC 6.3.1.2)
	peg.2823	K02567	periplasmic nitrate reductase NapA [EC:1.7.99.-]	napA	778.02	83.5692	9.30989			fig|1029756.3	peg.2822	K02568	cytochrome c-type protein NapB	napB	954.726	77.3948	12.3358	Nitrate reductase cytochrome c550-type subunit
	peg.276	K15576	nitrate/nitrite transport system substrate-binding protein	nrtA, nasF, cynA	418.42	47.285	8.84888			fig|1029756.3	peg.2823	K02567	periplasmic nitrate reductase NapA [EC:1.7.99.-]	napA	778.02	83.5692	9.30989	Periplasmic nitrate reductase precursor (EC 1.7.99.4)
	peg.274	K15578	nitrate/nitrite transport system ATP-binding protein [EC:3.6.3.-]	nrtC, nasD	297.348	37.5835	7.91166			fig|1029756.3	peg.276	K15576	nitrate/nitrite transport system substrate-binding protein	nrtA, nasF, cynA	418.42	47.285	8.84888	Nitrate ABC transporter2C nitrate-binding protein
	peg.1623	K00376	nitrous-oxide reductase [EC:1.7.2.4]	nosZ	1465.36	186.987	7.8367			fig|1029756.3	peg.274	K15578	nitrate/nitrite transport system ATP-binding protein [EC:3.6.3.-]	nrtC, nasD	297.348	37.5835	7.91166	Nitrate ABC transporter2C ATP-binding protein
	peg.3019	K00411	ubiquinol-cytochrome c reductase iron-sulfur subunit [EC:1.10.2.2]	UQCRFS1, RIP1, petA	681.851	93.5398	7.28942			fig|1029756.3	peg.1623	K00376	nitrous-oxide reductase [EC:1.7.2.4]	nosZ	1465.36	186.987	7.8367	Nitrous-oxide reductase (EC 1.7.99.6)
	peg.1501	K04561	nitric oxide reductase subunit B [EC:1.7.2.5]	norB	1425.45	205.475	6.93736			fig|1029756.3	peg.1501	K04561	nitric oxide reductase subunit B [EC:1.7.2.5]	norB	1425.45	205.475	6.93736	Nitric-oxide reductase subunit B (EC 1.7.99.7)
	peg.3208	K00830	alanine-glyoxylate transaminase / serine-glyoxylate transaminase / serine-pyruvate transaminase [EC:2.6.1.44 2.6.1.45 2.6.1.51]	AGXT	688.29	104.794	6.56805			fig|1029756.3	peg.275	K15577	nitrate/nitrite transport system permease protein	nrtB, nasE, cynB	270.802	41.3563	6.54802	Nitrate ABC transporter2C permease protein
	peg.275	K15577	nitrate/nitrite transport system permease protein	nrtB, nasE, cynB	270.802	41.3563	6.54802			fig|1029756.3	peg.1500	K02305	nitric oxide reductase subunit C	norC	1819.86	304.456	5.97741	Nitric-oxide reductase subunit C (EC 1.7.99.7)
	peg.2590	K00127	formate dehydrogenase subunit gamma	fdoI, fdsG	466.517	74.8266	6.23464			fig|1029756.3	peg.272	K00366	ferredoxin-nitrite reductase [EC:1.7.7.1]	nirA	148.823	36.6068	4.06544	Ferredoxin--nitrite reductase (EC 1.7.7.1)
	peg.3018	K00412	ubiquinol-cytochrome c reductase cytochrome b subunit	CYTB, petB	499.747	81.4987	6.13196			fig|1029756.3	peg.273	K00362	nitrite reductase (NADH) large subunit [EC:1.7.1.15]	nirB	133.322	34.6108	3.85203	Nitrite reductase [NAD(P)H] large subunit (EC 1.7.1.4)
	peg.1500	K02305	nitric oxide reductase subunit C	norC	1819.86	304.456	5.97741			fig|1029756.3	peg.270	K00372	assimilatory nitrate reductase catalytic subunit [EC:1.7.99.-]	nasA	64.2388	32.3072	1.98838	Assimilatory nitrate reductase large subunit (EC:1.7.99.4)
	peg.2589	K00124	formate dehydrogenase iron-sulfur subunit	fdoH, fdsB	499.118	88.8249	5.61912			fig|1029756.3	peg.3124	K00266	glutamate synthase (NADPH) small chain [EC:1.4.1.13]	gltD	72.5659	46.2547	1.56883	Glutamate synthase [NADPH] small chain (EC 1.4.1.13)
	peg.1129	K02110	F-type H+-transporting ATPase subunit c	ATPF0C, atpE	1071.46	197.627	5.42162			fig|1029756.3	peg.3123	K00265	glutamate synthase (NADPH) large chain [EC:1.4.1.13]	gltB	49.7471	49.5822	1.00333	Glutamate synthase [NADPH] large chain (EC 1.4.1.13)
	peg.483	K02111	F-type H+-transporting ATPase subunit alpha [EC:7.1.2.2]	ATPF1A, atpA	240.503	58.7909	4.09082			fig|1029756.3	peg.361	K01673	carbonic anhydrase [EC:4.2.1.1]	cynT, can	82.3044	100.21	0.821319	Carbonic anhydrase (EC 4.2.1.1)
	peg.272	K00366	ferredoxin-nitrite reductase [EC:1.7.7.1]	nirA	148.823	36.6068	4.06544			fig|1029756.3	peg.2731	K00262	glutamate dehydrogenase (NADP+) [EC:1.4.1.4]	E1.4.1.4, gdhA	36.686	51.5213	0.712056	NADP-specific glutamate dehydrogenase (EC 1.4.1.4)
	peg.2211	K01689	enolase [EC:4.2.1.11]	ENO, eno	150.806	38.4777	3.91931			fig|1029756.3	peg.2273	K01915	glutamine synthetase [EC:6.3.1.2]	glnA, GLUL	24.6766	43.3146	0.569705	Glutamine synthetase type I (EC 6.3.1.2)
	peg.273	K00362	nitrite reductase (NADH) large subunit [EC:1.7.1.15]	nirB	133.322	34.6108	3.85203			fig|1029756.3	peg.2112	K01915	glutamine synthetase [EC:6.3.1.2]	glnA, GLUL	38.1	68.8007	0.553774	glutamine synthetase family protein
	peg.2680	K10713	5,6,7,8-tetrahydromethanopterin hydro-lyase [EC:4.2.1.147]	fae	4911.85	1277.85	3.84383			fig|1029756.3	peg.1702	K01673	carbonic anhydrase [EC:4.2.1.1]	cynT, can	27.632	50.4226	0.548008	Carbonic anhydrase (EC 4.2.1.1)
	peg.368	K01681	aconitate hydratase [EC:4.2.1.3]	ACO, acnA	205.324	53.9753	3.80403			fig|1029756.3	peg.3040	K01674	carbonic anhydrase [EC:4.2.1.1]	cah	16.3142	42.786	0.381299	Carbonic anhydrase (EC 4.2.1.1)
	peg.2710	K00200	formylmethanofuran dehydrogenase subunit A [EC:1.2.7.12]	fwdA, fmdA	271.05	73.6391	3.68079			fig|1029756.3	peg.2108	K01915	glutamine synthetase [EC:6.3.1.2]	glnA, GLUL	14.482	53.0546	0.272963	glutamine synthetase family protein
	peg.3249	K00336	NADH-quinone oxidoreductase subunit G [EC:7.1.1.2]	nuoG	184.417	50.6493	3.64106
	peg.481	K02113	F-type H+-transporting ATPase subunit delta	ATPF1D, atpH	306.311	84.339	3.6319
	peg.1886	K00600	glycine hydroxymethyltransferase [EC:2.1.2.1]	glyA, SHMT	278.796	78.193	3.56549
	peg.2709	K00201	formylmethanofuran dehydrogenase subunit B [EC:1.2.7.12]	fwdB, fmdB	165.55	46.736	3.54223
	peg.1489	K00831	phosphoserine aminotransferase [EC:2.6.1.52]	serC, PSAT1	237.525	68.5597	3.46449
	peg.3219	K01938	formate--tetrahydrofolate ligase [EC:6.3.4.3]	fhs	262.996	77.8572	3.37794
	peg.2675	K10714	methylene-tetrahydromethanopterin dehydrogenase [EC:1.5.1.-]	mtdB	140.223	41.6825	3.36409
	peg.1128	K02109	F-type H+-transporting ATPase subunit b	ATPF0B, atpF	231.446	69.0275	3.35296
	peg.2955	K16255	cytochrome c-L	mxaG	2005.54	603.239	3.32462
	peg.3246	K00339	NADH-quinone oxidoreductase subunit J [EC:7.1.1.2]	nuoJ	222.858	67.2465	3.31405
	peg.2046	K00331	NADH-quinone oxidoreductase subunit B [EC:7.1.1.2]	nuoB	165.568	52.8461	3.13302
	peg.271	K00380	sulfite reductase (NADPH) flavoprotein alpha-component [EC:1.8.1.2]	cysJ	109.983	35.1278	3.13095
	peg.489	K02114	F-type H+-transporting ATPase subunit epsilon	ATPF1E, atpC	435.067	141.357	3.07779
	peg.1127	K02109	F-type H+-transporting ATPase subunit b	ATPF0B, atpF	211.538	69.4433	3.04619
	peg.2588	K00123	formate dehydrogenase major subunit [EC:1.17.1.9]	fdoG, fdhF, fdwA	703.956	235.42	2.99021
	peg.3210	K14067	malate-CoA ligase subunit beta [EC:6.2.1.9]	mtkA	261.975	87.7912	2.98407
	peg.2711	K00672	formylmethanofuran--tetrahydromethanopterin N-formyltransferase [EC:2.3.1.101]	ftr	198.602	67.1159	2.95909
	peg.2045	K00330	NADH-quinone oxidoreductase subunit A [EC:7.1.1.2]	nuoA	239.826	81.9404	2.92683
	peg.3251	K00334	NADH-quinone oxidoreductase subunit E [EC:7.1.1.2]	nuoE	273.882	95.0396	2.88176
	peg.484	K02115	F-type H+-transporting ATPase subunit gamma	ATPF1G, atpG	242.249	85.6435	2.82857
	peg.603	K00626	acetyl-CoA C-acetyltransferase [EC:2.3.1.9]	E2.3.1.9, atoB	415.623	151.813	2.73773
	peg.3250	K00335	NADH-quinone oxidoreductase subunit F [EC:7.1.1.2]	nuoF	165.383	61.5843	2.68548
	peg.467	K01903	succinyl-CoA synthetase beta subunit [EC:6.2.1.5]	sucC	260.471	97.7646	2.66426
	peg.2050	K00333	NADH-quinone oxidoreductase subunit D [EC:7.1.1.2]	nuoD	137.523	51.6732	2.66139
	peg.2047	K00332	NADH-quinone oxidoreductase subunit C [EC:7.1.1.2]	nuoC	176.941	66.8203	2.64801
	peg.2712	K00202	formylmethanofuran dehydrogenase subunit C [EC:1.2.7.12]	fwdC, fmdC	154.526	59.9567	2.57729
	peg.1130	K02108	F-type H+-transporting ATPase subunit a	ATPF0A, atpB	220.774	85.822	2.57247
	peg.3248	K00337	NADH-quinone oxidoreductase subunit H [EC:7.1.1.2]	nuoH	191.532	74.9259	2.55629
	peg.1592	K00404	cytochrome c oxidase cbb3-type subunit I [EC:1.9.3.1]	ccoN	201.328	82.7279	2.43362
	peg.3247	K00338	NADH-quinone oxidoreductase subunit I [EC:7.1.1.2]	nuoI	189.251	78.3854	2.41437
	peg.2954	K14029	methanol dehydrogenase (cytochrome c) subunit 2 [EC:1.1.2.7]	mdh2, mxaI	10910.6	4657.37	2.34264
	peg.3244	K00341	NADH-quinone oxidoreductase subunit L [EC:7.1.1.2]	nuoL	130.364	56.2378	2.31808
	peg.3242	K00343	NADH-quinone oxidoreductase subunit N [EC:7.1.1.2]	nuoN	92.4966	42.315	2.1859
	peg.1593	K00405	cytochrome c oxidase cbb3-type subunit II	ccoO	260.228	121.657	2.13903
	peg.1691	K00134	glyceraldehyde 3-phosphate dehydrogenase [EC:1.2.1.12]	GAPDH, gapA	100.388	48.6348	2.06411
	peg.487	K02112	F-type H+-transporting ATPase subunit beta [EC:7.1.2.2]	ATPF1B, atpD	278.368	136.433	2.04033
	peg.270	K00372	assimilatory nitrate reductase catalytic subunit [EC:1.7.99.-]	nasA	64.2388	32.3072	1.98838
	peg.759	K01491	methylenetetrahydrofolate dehydrogenase (NADP+) / methenyltetrahydrofolate cyclohydrolase [EC:1.5.1.5 3.5.4.9]	folD	155.154	80.4356	1.92892
	peg.3211	K08692	malate-CoA ligase subunit alpha [EC:6.2.1.9]	mtkB	210.153	112.041	1.87568
	peg.2957	K14028	methanol dehydrogenase (cytochrome c) subunit 1 [EC:1.1.2.7]	mdh1, mxaF	8788.35	4744.23	1.85243
	peg.3243	K00342	NADH-quinone oxidoreductase subunit M [EC:7.1.1.2]	nuoM	104.672	57.7076	1.81383
	peg.401	K01834	2,3-bisphosphoglycerate-dependent phosphoglycerate mutase [EC:5.4.2.11]	PGAM, gpmA	142.634	80.1865	1.77878
	peg.468	K01902	succinyl-CoA synthetase alpha subunit [EC:6.2.1.5]	sucD	265.391	152.668	1.73835
	peg.462	K00240	succinate dehydrogenase / fumarate reductase, iron-sulfur subunit [EC:1.3.5.1 1.3.5.4]	sdhB, frdB	138.995	80.7353	1.72161
	peg.3443	K15987	K(+)-stimulated pyrophosphate-energized sodium pump [EC:3.6.1.1]	hppA	122.353	73.5602	1.6633
	peg.653	K00830	alanine-glyoxylate transaminase / serine-glyoxylate transaminase / serine-pyruvate transaminase [EC:2.6.1.44 2.6.1.45 2.6.1.51]	AGXT	86.6661	53.1429	1.63081
	peg.2586	K00126	formate dehydrogenase subunit delta [EC:1.17.1.9]	fdsD	151.017	93.7312	1.61118
	peg.3245	K00340	NADH-quinone oxidoreductase subunit K [EC:7.1.1.2]	nuoK	205.258	129.417	1.58602
	peg.3124	K00266	glutamate synthase (NADPH) small chain [EC:1.4.1.13]	gltD	72.5659	46.2547	1.56883
	peg.3212	K01595	phosphoenolpyruvate carboxylase [EC:4.1.1.31]	ppc	86.1639	57.1898	1.50663
	peg.2034	K01011	thiosulfate/3-mercaptopyruvate sulfurtransferase [EC:2.8.1.1 2.8.1.2]	TST, MPST, sseA	129.062	87.7351	1.47104
	peg.2253	K00615	transketolase [EC:2.2.1.1]	E2.2.1.1, tktA, tktB	43.1913	30.7296	1.40553
	peg.2949	K16258	mxaK protein	mxaK	118.788	85.8633	1.38345
	peg.1686	K01623	fructose-bisphosphate aldolase, class I [EC:4.1.2.13]	ALDO	110.134	79.6304	1.38307
	peg.1111	K02276	cytochrome c oxidase subunit III [EC:1.9.3.1]	coxC, ctaE	164.728	122.152	1.34855
	peg.1063	K01961	acetyl-CoA carboxylase, biotin carboxylase subunit [EC:6.4.1.2 6.3.4.14]	accC	86.6714	65.9729	1.31374
	peg.1043	K02297	cytochrome o ubiquinol oxidase subunit II [EC:1.10.3.10]	cyoA	62.1679	47.4504	1.31017
	peg.466	K00024	malate dehydrogenase [EC:1.1.1.37]	mdh	134.42	103.25	1.3019
	peg.2373	K00031	isocitrate dehydrogenase [EC:1.1.1.42]	IDH1, IDH2, icd	70.3629	54.4509	1.29223
	peg.2072	K01807	ribose 5-phosphate isomerase A [EC:5.3.1.6]	rpiA	71.0934	55.2206	1.28744
	peg.651	K01738	cysteine synthase [EC:2.5.1.47]	cysK	111.267	87.773	1.26766
	peg.2677	K01499	methenyltetrahydromethanopterin cyclohydrolase [EC:3.5.4.27]	mch	52.0738	41.3138	1.26044
	peg.1595	K00406	cytochrome c oxidase cbb3-type subunit III	ccoP	281.455	225.596	1.24761
	peg.2951	K16256	mxaA protein	mxaA	71.2528	57.2469	1.24466
	peg.2093	K08691	malyl-CoA/(S)-citramalyl-CoA lyase [EC:4.1.3.24 4.1.3.25]	mcl	63.3188	50.875	1.24459
	peg.2661	K00955	bifunctional enzyme CysN/CysC [EC:2.7.7.4 2.7.1.25]	cysNC	50.6032	41.1086	1.23096
	peg.240	K01895	acetyl-CoA synthetase [EC:6.2.1.1]	ACSS, acs	86.0569	71.8575	1.19761
	peg.1062	K02160	acetyl-CoA carboxylase biotin carboxyl carrier protein	accB, bccP	140.659	118.754	1.18445
	peg.3495	K01963	acetyl-CoA carboxylase carboxyl transferase subunit beta [EC:6.4.1.2 2.1.3.15]	accD	60.2034	51.5296	1.16833
	peg.3290	K17226	sulfur-oxidizing protein SoxY	soxY	186.783	161.124	1.15925
	peg.130	K01962	acetyl-CoA carboxylase carboxyl transferase subunit alpha [EC:6.4.1.2 2.1.3.15]	accA	73.6154	64.7779	1.13643
	peg.2948	K16259	mxaL protein	mxaL	95.8919	84.4036	1.13611
	peg.647	K00329	NADH dehydrogenase [EC:7.1.1.2]	E7.1.1.2	60.6944	53.6215	1.13191
	peg.2252	K00927	phosphoglycerate kinase [EC:2.7.2.3]	PGK, pgk	52.366	47.4269	1.10414
	peg.2659	K00390	phosphoadenosine phosphosulfate reductase [EC:1.8.4.8 1.8.4.10]	cysH	54.2482	50.0943	1.08292
	peg.3238	K05606	methylmalonyl-CoA/ethylmalonyl-CoA epimerase [EC:5.1.99.1]	MCEE, epi	138.378	133.358	1.03764
	peg.2881	K01507	inorganic pyrophosphatase [EC:3.6.1.1]	ppa	56.6948	54.8587	1.03347
	peg.2950	K16257	mxaC protein	mxaC	54.2024	52.4607	1.0332
	peg.2660	K00957	sulfate adenylyltransferase subunit 2 [EC:2.7.7.4]	cysD	50.4785	49.75	1.01464
	peg.3123	K00265	glutamate synthase (NADPH) large chain [EC:1.4.1.13]	gltB	49.7471	49.5822	1.00333
	peg.355	K14449	2-methylfumaryl-CoA hydratase [EC:4.2.1.148]	mch, mcd	52.8746	53.3707	0.990705
	peg.1368	K10714	methylene-tetrahydromethanopterin dehydrogenase [EC:1.5.1.-]	mtdB	54.4411	55.2034	0.986192
	peg.1107	K02275	cytochrome c oxidase subunit II [EC:1.9.3.1]	coxB, ctaC	171.812	175.481	0.979088
	peg.3058	K01847	methylmalonyl-CoA mutase [EC:5.4.99.2]	MUT	45.8021	48.6502	0.941458
	peg.350	K00242	succinate dehydrogenase / fumarate reductase, membrane anchor subunit	sdhD, frdD	43.9636	50.0127	0.879049
	peg.1110	K02258	cytochrome c oxidase assembly protein subunit 11	COX11, ctaG	70.1654	83.1378	0.843965
	peg.595	K00641	homoserine O-acetyltransferase/O-succinyltransferase [EC:2.3.1.31 2.3.1.46]	metX	47.9821	56.9941	0.841878
	peg.361	K01673	carbonic anhydrase [EC:4.2.1.1]	cynT, can	82.3044	100.21	0.821319
	peg.345	K22468	polyphosphate kinase [EC:2.7.4.1]	ppk2	49.1658	59.9113	0.820642
	peg.1040	K02300	cytochrome o ubiquinol oxidase subunit IV	cyoD	53.7874	67.5476	0.796288
	peg.510	K00831	phosphoserine aminotransferase [EC:2.6.1.52]	serC, PSAT1	43.0865	55.0202	0.783102
	peg.3057	K01847	methylmalonyl-CoA mutase [EC:5.4.99.2]	MUT	17.9708	23.2105	0.774256
	peg.1041	K02299	cytochrome o ubiquinol oxidase subunit III	cyoC	48.1494	62.2529	0.773447
	peg.2664	K00381	sulfite reductase (NADPH) hemoprotein beta-component [EC:1.8.1.2]	cysI	36.6831	47.6731	0.769471
	peg.686	K03885	NADH dehydrogenase [EC:1.6.99.3]	ndh	28.276	36.9748	0.764739
	peg.2665	K00380	sulfite reductase (NADPH) flavoprotein alpha-component [EC:1.8.1.2]	cysJ	33.9165	44.4597	0.762859
	peg.1197	K00855	phosphoribulokinase [EC:2.7.1.19]	PRK, prkB	45.689	59.9596	0.761995
	peg.2494	K00640	serine O-acetyltransferase [EC:2.3.1.30]	cysE	30.7228	40.5421	0.757799
	peg.1042	K02298	cytochrome o ubiquinol oxidase subunit I [EC:1.10.3.10]	cyoB	41.1115	54.3683	0.756166
	peg.2330	K00626	acetyl-CoA C-acetyltransferase [EC:2.3.1.9]	E2.3.1.9, atoB	31.9987	43.0847	0.742694
	peg.1644	K00122	formate dehydrogenase [EC:1.17.1.9]	FDH	219.214	296.732	0.738759
	peg.2731	K00262	glutamate dehydrogenase (NADP+) [EC:1.4.1.4]	E1.4.1.4, gdhA	36.686	51.5213	0.712056
	peg.1650	K01739	cystathionine gamma-synthase [EC:2.5.1.48]	metB	57.1899	80.9452	0.706525
	peg.2704	K17226	sulfur-oxidizing protein SoxY	soxY	44.5324	63.8604	0.697341
	peg.349	K00239	succinate dehydrogenase / fumarate reductase, flavoprotein subunit [EC:1.3.5.1 1.3.5.4]	sdhA, frdA	33.2725	47.7428	0.696911
	peg.351	K00241	succinate dehydrogenase / fumarate reductase, cytochrome b subunit	sdhC, frdC	51.8861	76.7154	0.676346
	peg.1108	K02257	heme o synthase [EC:2.5.1.141]	COX10, ctaB, cyoE	79.2753	117.536	0.674477
	peg.2621	K16255	cytochrome c-L	mxaG	53.5422	85.1917	0.628491
	peg.2273	K01915	glutamine synthetase [EC:6.3.1.2]	glnA, GLUL	24.6766	43.3146	0.569705
	peg.1355	K01006	pyruvate, orthophosphate dikinase [EC:2.7.9.1]	ppdK	26.2088	46.2848	0.56625
	peg.2501	K00297	methylenetetrahydrofolate reductase (NADPH) [EC:1.5.1.20]	metF, MTHFR	173.24	312.344	0.554644
	peg.2112	K01915	glutamine synthetase [EC:6.3.1.2]	glnA, GLUL	38.1	68.8007	0.553774
	peg.2335	K17226	sulfur-oxidizing protein SoxY	soxY	32.6452	58.976	0.553534
	peg.1702	K01673	carbonic anhydrase [EC:4.2.1.1]	cynT, can	27.632	50.4226	0.548008
	peg.2336	K17227	sulfur-oxidizing protein SoxZ	soxZ	37.8942	69.461	0.545546
	peg.2275	K22082	methylamine---glutamate N-methyltransferase subunit B [EC:2.1.1.21]	mgsB	26.5275	52.1881	0.508305
	peg.2274	K22083	methylamine---glutamate N-methyltransferase subunit C [EC:2.1.1.21]	mgsC	19.9753	39.3857	0.507172
	peg.3185	K01679	fumarate hydratase, class II [EC:4.2.1.2]	E4.2.1.2B, fumC, FH	25.6695	51.4536	0.498887
	peg.3449	K00426	cytochrome bd ubiquinol oxidase subunit II [EC:1.10.3.14]	cydB	26.3972	55.8185	0.472911
	peg.1332	K00937	polyphosphate kinase [EC:2.7.4.1]	ppk	28.1069	63.2866	0.444121
	peg.1676	K01803	triosephosphate isomerase (TIM) [EC:5.3.1.1]	TPI, tpiA	18.6974	43.373	0.431083
	peg.1780	K11532	fructose-1,6-bisphosphatase II / sedoheptulose-1,7-bisphosphatase [EC:3.1.3.11 3.1.3.37]	glpX-SEBP	37.6285	88.8354	0.423576
	peg.2276	K22081	methylamine---glutamate N-methyltransferase subunit A [EC:2.1.1.21]	mgsA	24.2219	59.0206	0.410398
	peg.3040	K01674	carbonic anhydrase [EC:4.2.1.1]	cah	16.3142	42.786	0.381299
	peg.3167	K01082	3'(2'), 5'-bisphosphate nucleotidase [EC:3.1.3.7]	cysQ, MET22, BPNT1	16.5771	46.4295	0.357039
	peg.439	K10764	O-succinylhomoserine sulfhydrylase [EC:2.5.1.-]	metZ	28.4328	80.2047	0.354503
	peg.509	K00058	D-3-phosphoglycerate dehydrogenase / 2-oxoglutarate reductase [EC:1.1.1.95 1.1.1.399]	serA, PHGDH	17.4588	49.7068	0.351237
	peg.3448	K00425	cytochrome bd ubiquinol oxidase subunit I [EC:1.10.3.14]	cydA	17.7203	50.7186	0.349385
	peg.1198	K03841	fructose-1,6-bisphosphatase I [EC:3.1.3.11]	FBP, fbp	52.5902	155.278	0.338685
	peg.2998	K02259	cytochrome c oxidase assembly protein subunit 15	COX15, ctaA	13.6062	47.3183	0.287547
	peg.1193	K01783	ribulose-phosphate 3-epimerase [EC:5.1.3.1]	rpe, RPE	11.6175	41.2673	0.281519
	peg.3353	K02045	sulfate transport system ATP-binding protein [EC:3.6.3.25]	cysA	17.3685	63.2411	0.27464
	peg.2108	K01915	glutamine synthetase [EC:6.3.1.2]	glnA, GLUL	14.482	53.0546	0.272963
	peg.3362	K02048	sulfate transport system substrate-binding protein	cysP, sbp	13.0007	48.9386	0.265653
	peg.2745	K01079	phosphoserine phosphatase [EC:3.1.3.3]	serB, PSPH	10.5573	46.1421	0.228799
	peg.3516	K17226	sulfur-oxidizing protein SoxY	soxY	13.1051	59.336	0.220862
	peg.886	K22468	polyphosphate kinase [EC:2.7.4.1]	ppk2	24.3063	123.613	0.196632
	peg.1420	K03890	ubiquinol-cytochrome c reductase iron-sulfur subunit	qcrA	6.90284	38.6404	0.178643
	peg.2561	K17226	sulfur-oxidizing protein SoxY	soxY	7.47023	42.7586	0.174707
	peg.2596	K00029	malate dehydrogenase (oxaloacetate-decarboxylating)(NADP+) [EC:1.1.1.40]	E1.1.1.40, maeB	6.11773	41.8176	0.146296
	peg.2595	K00029	malate dehydrogenase (oxaloacetate-decarboxylating)(NADP+) [EC:1.1.1.40]	E1.1.1.40, maeB	6.5569	47.5258	0.137965
	peg.3354	K02047	sulfate transport system permease protein	cysW	9.94288	93.1468	0.106744
	peg.3355	K02046	sulfate transport system permease protein	cysU	7.73252	73.8044	0.10477
	peg.3360	K02048	sulfate transport system substrate-binding protein	cysP, sbp	5.928	59.9168	0.0989372
	peg.2813	K02275	cytochrome c oxidase subunit II [EC:1.9.3.1]	coxB, ctaC	3.47049	39.7296	0.0873526
	peg.2764	K01738	cysteine synthase [EC:2.5.1.47]	cysK	3.41133	40.9271	0.0833513
	peg.930	K00626	acetyl-CoA C-acetyltransferase [EC:2.3.1.9]	E2.3.1.9, atoB	3.51126	43.0016	0.0816542
	peg.2812	K15408	cytochrome c oxidase subunit I+III [EC:1.9.3.1]	coxAC	3.15253	47.0682	0.066978
	peg.1260	K00297	methylenetetrahydrofolate reductase (NADPH) [EC:1.5.1.20]	metF, MTHFR	4.3996	71.7754	0.0612967
	peg.1257	K01938	formate--tetrahydrofolate ligase [EC:6.3.4.3]	fhs	1.63391	48.2012	0.0338977
	peg.2761	K00640	serine O-acetyltransferase [EC:2.3.1.30]	cysE	1.44671	44.9276	0.0322009
	peg.523	K15228	methylamine dehydrogenase light chain [EC:1.4.9.1]	mauA	5.75825	378.324	0.0152204
	peg.520	K15229	methylamine dehydrogenase heavy chain [EC:1.4.9.1]	mauB	3.96013	328.55	0.0120534
09103 Lipid metabolism
00061 Fatty acid biosynthesis [PATH:ko00061]
00071 Fatty acid degradation [PATH:ko00071]
00072 Synthesis and degradation of ketone bodies [PATH:ko00072]
00561 Glycerolipid metabolism [PATH:ko00561]
00564 Glycerophospholipid metabolism [PATH:ko00564]
00590 Arachidonic acid metabolism [PATH:ko00590]
01040 Biosynthesis of unsaturated fatty acids [PATH:ko01040]
	peg.1478	K02372	3-hydroxyacyl-[acyl-carrier-protein] dehydratase [EC:4.2.1.59]	fabZ	1193.27	211.35	5.64594
	peg.1477	K09458	3-oxoacyl-[acyl-carrier-protein] synthase II [EC:2.3.1.179]	fabF	424.589	84.9444	4.99844
	peg.1474	K09458	3-oxoacyl-[acyl-carrier-protein] synthase II [EC:2.3.1.179]	fabF	275.369	75.0823	3.66757
	peg.1476	K09458	3-oxoacyl-[acyl-carrier-protein] synthase II [EC:2.3.1.179]	fabF	278.249	96.4639	2.88449
	peg.603	K00626	acetyl-CoA C-acetyltransferase [EC:2.3.1.9]	E2.3.1.9, atoB	415.623	151.813	2.73773
	peg.1480	K00059	3-oxoacyl-[acyl-carrier protein] reductase [EC:1.1.1.100]	fabG	202.308	74.3269	2.72187
	peg.1473	K09458	3-oxoacyl-[acyl-carrier-protein] synthase II [EC:2.3.1.179]	fabF	269.001	100.771	2.66944
	peg.2286	K02078	acyl carrier protein	acpP	626.959	258.323	2.42704
	peg.1830	K00570	phosphatidylethanolamine/phosphatidyl-N-methylethanolamine N-methyltransferase [EC:2.1.1.17 2.1.1.71]	pmtA	289.784	124.455	2.32842
	peg.2328	K02078	acyl carrier protein	acpP	1141.99	538.727	2.11979
	peg.2285	K09458	3-oxoacyl-[acyl-carrier-protein] synthase II [EC:2.3.1.179]	fabF	96.6103	51.376	1.88046
	peg.1482	K02078	acyl carrier protein	acpP	601.391	320.904	1.87405
	peg.185	K00647	3-oxoacyl-[acyl-carrier-protein] synthase I [EC:2.3.1.41]	fabB	159.609	85.5357	1.866
	peg.1369	K08744	cardiolipin synthase (CMP-forming) [EC:2.7.8.41]	CRLS	83.589	49.348	1.69387
	peg.1659	K00208	enoyl-[acyl-carrier protein] reductase I [EC:1.3.1.9 1.3.1.10]	fabI	92.1437	62.9747	1.46319
	peg.2287	K00059	3-oxoacyl-[acyl-carrier protein] reductase [EC:1.1.1.100]	fabG	74.3287	51.1081	1.45434
	peg.186	K01716	3-hydroxyacyl-[acyl-carrier protein] dehydratase / trans-2-decenoyl-[acyl-carrier protein] isomerase [EC:4.2.1.59 5.3.3.14]	fabA	182.324	130.439	1.39777
	peg.1063	K01961	acetyl-CoA carboxylase, biotin carboxylase subunit [EC:6.4.1.2 6.3.4.14]	accC	86.6714	65.9729	1.31374
	peg.2791	K02372	3-hydroxyacyl-[acyl-carrier-protein] dehydratase [EC:4.2.1.59]	fabZ	78.8564	63.4342	1.24312
	peg.184	K00208	enoyl-[acyl-carrier protein] reductase I [EC:1.3.1.9 1.3.1.10]	fabI	101.579	84.6168	1.20045
	peg.1062	K02160	acetyl-CoA carboxylase biotin carboxyl carrier protein	accB, bccP	140.659	118.754	1.18445
	peg.3495	K01963	acetyl-CoA carboxylase carboxyl transferase subunit beta [EC:6.4.1.2 2.1.3.15]	accD	60.2034	51.5296	1.16833
	peg.130	K01962	acetyl-CoA carboxylase carboxyl transferase subunit alpha [EC:6.4.1.2 2.1.3.15]	accA	73.6154	64.7779	1.13643
	peg.2288	K00645	[acyl-carrier-protein] S-malonyltransferase [EC:2.3.1.39]	fabD	40.2741	39.283	1.02523
	peg.582	K00655	1-acyl-sn-glycerol-3-phosphate acyltransferase [EC:2.3.1.51]	plsC	53.8786	55.2269	0.975586
	peg.422	K10805	acyl-CoA thioesterase II [EC:3.1.2.-]	tesB	44.8008	47.3437	0.946287
	peg.3437	K00648	3-oxoacyl-[acyl-carrier-protein] synthase III [EC:2.3.1.180]	fabH	42.8494	54.3896	0.787824
	peg.3375	K00865	glycerate 2-kinase [EC:2.7.1.165]	glxK, garK	36.1548	46.7897	0.772708
	peg.3120	K01048	lysophospholipase [EC:3.1.1.5]	pldB	37.2596	49.4563	0.753383
	peg.2733	K00059	3-oxoacyl-[acyl-carrier protein] reductase [EC:1.1.1.100]	fabG	59.8854	80.0887	0.747739
	peg.2330	K00626	acetyl-CoA C-acetyltransferase [EC:2.3.1.9]	E2.3.1.9, atoB	31.9987	43.0847	0.742694
	peg.1329	K08744	cardiolipin synthase (CMP-forming) [EC:2.7.8.41]	CRLS	43.014	58.5598	0.734531
	peg.3196	K01613	phosphatidylserine decarboxylase [EC:4.1.1.65]	psd, PISD	53.1428	73.2834	0.725169
	peg.2331	K01782	3-hydroxyacyl-CoA dehydrogenase / enoyl-CoA hydratase / 3-hydroxybutyryl-CoA epimerase [EC:1.1.1.35 4.2.1.17 5.1.2.3]	fadJ	39.3137	54.2849	0.724211
	peg.151	K01692	enoyl-CoA hydratase [EC:4.2.1.17]	paaF, echA	31.9371	51.0539	0.625557
	peg.2361	K00128	aldehyde dehydrogenase (NAD+) [EC:1.2.1.3]	ALDH	28.144	46.5646	0.604408
	peg.3197	K17103	CDP-diacylglycerol---serine O-phosphatidyltransferase [EC:2.7.8.8]	CHO1, pssA	32.9188	55.2044	0.596307
	peg.3438	K03621	glycerol-3-phosphate acyltransferase PlsX [EC:2.3.1.15]	plsX	39.2392	66.6475	0.588756
	peg.2332	K06445	acyl-CoA dehydrogenase [EC:1.3.99.-]	fadE	25.7271	43.7665	0.587825
	peg.1069	K00059	3-oxoacyl-[acyl-carrier protein] reductase [EC:1.1.1.100]	fabG	16.6456	30.187	0.551416
	peg.230	K10804	acyl-CoA thioesterase I [EC:3.1.2.- 3.1.1.5]	tesA	35.1079	65.7189	0.534214
	peg.3031	K08591	glycerol-3-phosphate acyltransferase PlsY [EC:2.3.1.15]	plsY	22.1305	43.0412	0.514171
	peg.2329	K01897	long-chain acyl-CoA synthetase [EC:6.2.1.3]	ACSL, fadD	34.1953	69.7136	0.490511
	peg.1881	K01692	enoyl-CoA hydratase [EC:4.2.1.17]	paaF, echA	18.6072	44.4671	0.418449
	peg.2782	K00981	phosphatidate cytidylyltransferase [EC:2.7.7.41]	E2.7.7.41, CDS1, CDS2, cdsA	13.8844	34.5283	0.402118
	peg.2188	K05939	acyl-[acyl-carrier-protein]-phospholipid O-acyltransferase / long-chain-fatty-acid--[acyl-carrier-protein] ligase [EC:2.3.1.40 6.2.1.20]	aas	15.1411	39.1416	0.386828
	peg.1736	K00432	glutathione peroxidase [EC:1.11.1.9]	gpx	37.7009	98.6546	0.382151
	peg.112	K00648	3-oxoacyl-[acyl-carrier-protein] synthase III [EC:2.3.1.180]	fabH	15.248	43.3535	0.351713
	peg.2732	K00111	glycerol-3-phosphate dehydrogenase [EC:1.1.5.3]	glpA, glpD	12.2742	36.2498	0.338599
	peg.248	K00057	glycerol-3-phosphate dehydrogenase (NAD(P)+) [EC:1.1.1.94]	gpsA	10.0988	33.17	0.304457
	peg.929	K09458	3-oxoacyl-[acyl-carrier-protein] synthase II [EC:2.3.1.179]	fabF	5.90946	47.3764	0.124734
	peg.1556	K13623	S-adenosylmethionine-diacylgycerolhomoserine-N-methlytransferase	btaB	2.79136	28.0005	0.0996895
	peg.930	K00626	acetyl-CoA C-acetyltransferase [EC:2.3.1.9]	E2.3.1.9, atoB	3.51126	43.0016	0.0816542
	peg.1555	K13622	S-adenosylmethionine-diacylglycerol 3-amino-3-carboxypropyl transferase	btaA	2.18764	46.2644	0.0472857
09104 Nucleotide metabolism
00230 Purine metabolism [PATH:ko00230]
00240 Pyrimidine metabolism [PATH:ko00240]
	peg.1904	K00525	ribonucleoside-diphosphate reductase alpha chain [EC:1.17.4.1]	E1.17.4.1A, nrdA, nrdE	572.371	39.691	14.4207
	peg.1903	K00526	ribonucleoside-diphosphate reductase beta chain [EC:1.17.4.1]	E1.17.4.1B, nrdB, nrdF	620.458	46.9826	13.2061
	peg.1874	K00525	ribonucleoside-diphosphate reductase alpha chain [EC:1.17.4.1]	E1.17.4.1A, nrdA, nrdE	344.252	53.0277	6.49192
	peg.1490	K00254	dihydroorotate dehydrogenase [EC:1.3.5.2]	DHODH, pyrD	268.941	87.5787	3.07085
	peg.3152	K03060	DNA-directed RNA polymerase subunit omega [EC:2.7.7.6]	rpoZ	352.551	127.39	2.7675
	peg.2844	K03040	DNA-directed RNA polymerase subunit alpha [EC:2.7.7.6]	rpoA	257.838	104.022	2.47869
	peg.2350	K01923	phosphoribosylaminoimidazole-succinocarboxamide synthase [EC:6.3.2.6]	purC	488.913	198.901	2.45807
	peg.1323	K00940	nucleoside-diphosphate kinase [EC:2.7.4.6]	ndk, NME	136.864	66.5828	2.05555
	peg.178	K02338	DNA polymerase III subunit beta [EC:2.7.7.7]	dnaN	140.98	69.6438	2.0243
	peg.2351	K01952	phosphoribosylformylglycinamidine synthase [EC:6.3.5.3]	purL, PFAS	170.046	91.6248	1.8559
	peg.2847	K00939	adenylate kinase [EC:2.7.4.3]	adk, AK	172.962	99.819	1.73276
	peg.793	K01591	orotidine-5'-phosphate decarboxylase [EC:4.1.1.23]	pyrF	83.2636	49.4061	1.68529
	peg.3114	K00873	pyruvate kinase [EC:2.7.1.40]	PK, pyk	77.0844	46.8015	1.64705
	peg.2299	K00764	amidophosphoribosyltransferase [EC:2.4.2.14]	purF, PPAT	112.239	70.6636	1.58836
	peg.1545	K00962	polyribonucleotide nucleotidyltransferase [EC:2.7.7.8]	pnp, PNPT1	135.724	86.6361	1.5666
	peg.377	K02342	DNA polymerase III subunit epsilon [EC:2.7.7.7]	dnaQ	69.8203	45.3239	1.54047
	peg.2141	K01955	carbamoyl-phosphate synthase large subunit [EC:6.3.5.5]	carB, CPA2	46.7517	33.9952	1.37524
	peg.2661	K00955	bifunctional enzyme CysN/CysC [EC:2.7.7.4 2.7.1.25]	cysNC	50.6032	41.1086	1.23096
	peg.2345	K01756	adenylosuccinate lyase [EC:4.3.2.2]	purB, ADSL	52.023	43.3514	1.20003
	peg.2885	K03043	DNA-directed RNA polymerase subunit beta [EC:2.7.7.6]	rpoB	133.572	112.098	1.19157
	peg.578	K00760	hypoxanthine phosphoribosyltransferase [EC:2.4.2.8]	hprT, hpt, HPRT1	78.3995	68.8321	1.139
	peg.1031	K00088	IMP dehydrogenase [EC:1.1.1.205]	IMPDH, guaB	68.3877	60.9534	1.12197
	peg.3253	K02343	DNA polymerase III subunit gamma/tau [EC:2.7.7.7]	dnaX	49.3028	45.9934	1.07195
	peg.2884	K03046	DNA-directed RNA polymerase subunit beta' [EC:2.7.7.6]	rpoC	147.143	137.391	1.07098
	peg.1939	K03787	5'-nucleotidase [EC:3.1.3.5]	surE	51.1215	49.4186	1.03446
	peg.2660	K00957	sulfate adenylyltransferase subunit 2 [EC:2.7.7.4]	cysD	50.4785	49.75	1.01464
	peg.3484	K00948	ribose-phosphate pyrophosphokinase [EC:2.7.6.1]	PRPS, prsA	47.8421	47.412	1.00907
	peg.2353	K01952	phosphoribosylformylglycinamidine synthase [EC:6.3.5.3]	purL, PFAS	43.929	44.6361	0.98416
	peg.3151	K01139	GTP diphosphokinase / guanosine-3',5'-bis(diphosphate) 3'-diphosphatase [EC:2.7.6.5 3.1.7.2]	spoT	39.4859	41.3866	0.954074
	peg.3191	K00560	thymidylate synthase [EC:2.1.1.45]	thyA, TYMS	49.2276	51.63	0.953468
	peg.1720	K01939	adenylosuccinate synthase [EC:6.3.4.4]	purA, ADSS	45.2436	49.8837	0.906982
	peg.2778	K09903	uridylate kinase [EC:2.7.4.22]	pyrH	56.223	64.1151	0.876908
	peg.1672	K01937	CTP synthase [EC:6.3.4.2]	pyrG, CTPS	62.5052	71.4443	0.87488
	peg.1028	K01524	exopolyphosphatase / guanosine-5'-triphosphate,3'-diphosphate pyrophosphatase [EC:3.6.1.11 3.6.1.40]	ppx-gppA	84.4738	98.8817	0.854291
	peg.2356	K01952	phosphoribosylformylglycinamidine synthase [EC:6.3.5.3]	purL, PFAS	32.8737	39.8537	0.824859
	peg.3503	K00945	CMP/dCMP kinase [EC:2.7.4.25]	cmk	46.3255	56.9013	0.814139
	peg.2138	K01956	carbamoyl-phosphate synthase small subunit [EC:6.3.5.5]	carA, CPA1	39.6068	48.7855	0.811856
	peg.2750	K06966	pyrimidine/purine-5'-nucleotide nucleosidase [EC:3.2.2.10 3.2.2.-]	ppnN	64.7948	83.1509	0.779244
	peg.1327	K01933	phosphoribosylformylglycinamidine cyclo-ligase [EC:6.3.3.1]	purM	29.1386	38.689	0.753149
	peg.585	K00525	ribonucleoside-diphosphate reductase alpha chain [EC:1.17.4.1]	E1.17.4.1A, nrdA, nrdE	71.113	95.9761	0.740945
	peg.1525	K09019	3-hydroxypropanoate dehydrogenase [EC:1.1.1.-]	rutE	45.7152	62.9649	0.726043
	peg.3230	K02337	DNA polymerase III subunit alpha [EC:2.7.7.7]	dnaE	31.8648	45.021	0.707776
	peg.1326	K11175	phosphoribosylglycinamide formyltransferase 1 [EC:2.1.2.2]	purN	36.2969	51.5413	0.70423
	peg.33	K00254	dihydroorotate dehydrogenase [EC:1.3.5.2]	DHODH, pyrD	22.4722	33.9399	0.662119
	peg.2164	K01588	5-(carboxyamino)imidazole ribonucleotide mutase [EC:5.4.99.18]	purE	32.9304	51.31	0.641792
	peg.1036	K01951	GMP synthase (glutamine-hydrolysing) [EC:6.3.5.2]	guaA, GMPS	28.8547	45.0362	0.6407
	peg.234	K00602	phosphoribosylaminoimidazolecarboxamide formyltransferase / IMP cyclohydrolase [EC:2.1.2.3 3.5.4.10]	purH	34.5951	62.4446	0.554013
	peg.2163	K01589	5-(carboxyamino)imidazole ribonucleotide synthase [EC:6.3.4.18]	purK	17.2718	31.3413	0.551088
	peg.164	K00762	orotate phosphoribosyltransferase [EC:2.4.2.10]	pyrE	41.6357	76.3516	0.545315
	peg.2304	K02341	DNA polymerase III subunit delta' [EC:2.7.7.7]	holB	16.4993	30.5532	0.540021
	peg.2305	K00943	dTMP kinase [EC:2.7.4.9]	tmk, DTYMK	35.2535	72.1525	0.488597
	peg.2424	K15778	phosphomannomutase / phosphoglucomutase [EC:5.4.2.8 5.4.2.2]	pmm-pgm	23.1351	52.248	0.442794
	peg.326	K02335	DNA polymerase I [EC:2.7.7.7]	polA	17.5754	45.9614	0.382395
	peg.560	K02339	DNA polymerase III subunit chi [EC:2.7.7.7]	holC	12.5469	34.892	0.359593
	peg.2282	K00942	guanylate kinase [EC:2.7.4.8]	E2.7.4.8, gmk	20.2984	60.0093	0.338254
	peg.1333	K01524	exopolyphosphatase / guanosine-5'-triphosphate,3'-diphosphate pyrophosphatase [EC:3.6.1.11 3.6.1.40]	ppx-gppA	13.3465	41.1914	0.324011
	peg.434	K02340	DNA polymerase III subunit delta [EC:2.7.7.7]	holA	17.4864	55.2456	0.316521
	peg.440	K01494	dCTP deaminase [EC:3.5.4.13]	dcd	21.3974	69.9814	0.305758
	peg.63	K01768	adenylate cyclase [EC:4.6.1.1]	E4.6.1.1	14.6477	52.7341	0.277765
	peg.2233	K04765	nucleoside triphosphate diphosphatase [EC:3.6.1.9]	mazG	9.52636	34.6564	0.27488
	peg.2181	K01945	phosphoribosylamine---glycine ligase [EC:6.3.4.13]	purD	12.0318	46.8375	0.256885
	peg.650	K01520	dUTP pyrophosphatase [EC:3.6.1.23]	dut, DUT	12.6429	61.5805	0.205308
	peg.784	K02428	XTP/dITP diphosphohydrolase [EC:3.6.1.66]	rdgB	8.54066	48.6656	0.175497
	peg.1926	K01129	dGTPase [EC:3.1.5.1]	dgt	5.76375	35.6159	0.161831
	peg.3512	K00759	adenine phosphoribosyltransferase [EC:2.4.2.7]	APRT, apt	23.8872	152.872	0.156257
	peg.1770	K01768	adenylate cyclase [EC:4.6.1.1]	E4.6.1.1	5.00679	61.2229	0.0817796
09105 Amino acid metabolism
00250 Alanine, aspartate and glutamate metabolism [PATH:ko00250]
00260 Glycine, serine and threonine metabolism [PATH:ko00260]
00270 Cysteine and methionine metabolism [PATH:ko00270]
00280 Valine, leucine and isoleucine degradation [PATH:ko00280]
00290 Valine, leucine and isoleucine biosynthesis [PATH:ko00290]
00300 Lysine biosynthesis [PATH:ko00300]
00310 Lysine degradation [PATH:ko00310]
00220 Arginine biosynthesis [PATH:ko00220]
00330 Arginine and proline metabolism [PATH:ko00330]
00340 Histidine metabolism [PATH:ko00340]
00350 Tyrosine metabolism [PATH:ko00350]
00360 Phenylalanine metabolism [PATH:ko00360]
00380 Tryptophan metabolism [PATH:ko00380]
00400 Phenylalanine, tyrosine and tryptophan biosynthesis [PATH:ko00400]
09106 Metabolism of other amino acids
00410 beta-Alanine metabolism [PATH:ko00410]
00430 Taurine and hypotaurine metabolism [PATH:ko00430]
00440 Phosphonate and phosphinate metabolism [PATH:ko00440]
00450 Selenocompound metabolism [PATH:ko00450]
00460 Cyanoamino acid metabolism [PATH:ko00460]
00471 D-Glutamine and D-glutamate metabolism [PATH:ko00471]
00472 D-Arginine and D-ornithine metabolism [PATH:ko00472]
00473 D-Alanine metabolism [PATH:ko00473]
00480 Glutathione metabolism [PATH:ko00480]
	peg.1976	K01915	glutamine synthetase [EC:6.3.1.2]	glnA, GLUL	1385.18	74.9914	18.4712
	peg.1910	K00549	5-methyltetrahydropteroyltriglutamate--homocysteine methyltransferase [EC:2.1.1.14]	metE	384.901	43.0179	8.94748
	peg.3208	K00830	alanine-glyoxylate transaminase / serine-glyoxylate transaminase / serine-pyruvate transaminase [EC:2.6.1.44 2.6.1.45 2.6.1.51]	AGXT	688.29	104.794	6.56805
	peg.3477	K00286	pyrroline-5-carboxylate reductase [EC:1.5.1.2]	proC	351.661	54.3763	6.46717
	peg.1885	K00643	5-aminolevulinate synthase [EC:2.3.1.37]	E2.3.1.37, ALAS	660.439	178.114	3.70795
	peg.1886	K00600	glycine hydroxymethyltransferase [EC:2.1.2.1]	glyA, SHMT	278.796	78.193	3.56549
	peg.1489	K00831	phosphoserine aminotransferase [EC:2.6.1.52]	serC, PSAT1	237.525	68.5597	3.46449
	peg.3519	K01611	S-adenosylmethionine decarboxylase [EC:4.1.1.50]	speD, AMD1	411.517	138.98	2.96098
	peg.2742	K01652	acetolactate synthase I/II/III large subunit [EC:2.2.1.6]	E2.2.1.6L, ilvB, ilvG, ilvI	137.026	49.3338	2.77752
	peg.603	K00626	acetyl-CoA C-acetyltransferase [EC:2.3.1.9]	E2.3.1.9, atoB	415.623	151.813	2.73773
	peg.1535	K00789	S-adenosylmethionine synthetase [EC:2.5.1.6]	metK	135.386	57.1272	2.36991
	peg.2737	K00053	ketol-acid reductoisomerase [EC:1.1.1.86]	ilvC	149.251	63.0205	2.36829
	peg.500	K00074	3-hydroxybutyryl-CoA dehydrogenase [EC:1.1.1.157]	paaH, hbd, fadB, mmgB	211.161	104.269	2.02516
	peg.67	K00013	histidinol dehydrogenase [EC:1.1.1.23]	hisD	65.8174	32.8563	2.00319
	peg.1922	K01687	dihydroxy-acid dehydratase [EC:4.2.1.9]	ilvD	147.648	77.3813	1.90805
	peg.160	K01814	phosphoribosylformimino-5-aminoimidazole carboxamide ribotide isomerase [EC:5.3.1.16]	hisA	72.674	38.9179	1.86737
	peg.205	K01966	propionyl-CoA carboxylase beta chain [EC:6.4.1.3 2.1.3.15]	PCCB, pccB	113.042	62.9661	1.79529
	peg.401	K01834	2,3-bisphosphoglycerate-dependent phosphoglycerate mutase [EC:5.4.2.11]	PGAM, gpmA	142.634	80.1865	1.77878
	peg.2498	K00548	5-methyltetrahydrofolate--homocysteine methyltransferase [EC:2.1.1.13]	metH, MTR	73.1283	44.4473	1.64528
	peg.653	K00830	alanine-glyoxylate transaminase / serine-glyoxylate transaminase / serine-pyruvate transaminase [EC:2.6.1.44 2.6.1.45 2.6.1.51]	AGXT	86.6661	53.1429	1.63081
	peg.2740	K01653	acetolactate synthase I/III small subunit [EC:2.2.1.6]	E2.2.1.6S, ilvH, ilvN	95.854	59.0327	1.62375
	peg.2299	K00764	amidophosphoribosyltransferase [EC:2.4.2.14]	purF, PPAT	112.239	70.6636	1.58836
	peg.3159	K01714	4-hydroxy-tetrahydrodipicolinate synthase [EC:4.3.3.7]	dapA	133.742	84.3227	1.58608
	peg.3124	K00266	glutamate synthase (NADPH) small chain [EC:1.4.1.13]	gltD	72.5659	46.2547	1.56883
	peg.165	K02501	glutamine amidotransferase [EC:2.4.2.-]	hisH	118.003	77.2335	1.52787
	peg.3258	K00290	saccharopine dehydrogenase (NAD+, L-lysine forming) [EC:1.5.1.7]	LYS1	96.3221	63.1087	1.52629
	peg.7	K01251	adenosylhomocysteinase [EC:3.3.1.1]	E3.3.1.1, ahcY	283.049	189.222	1.49585
	peg.1508	K03781	catalase [EC:1.11.1.6]	katE, CAT, catB, srpA	153.056	103.993	1.4718
	peg.2034	K01011	thiosulfate/3-mercaptopyruvate sulfurtransferase [EC:2.8.1.1 2.8.1.2]	TST, MPST, sseA	129.062	87.7351	1.47104
	peg.1061	K03786	3-dehydroquinate dehydratase II [EC:4.2.1.10]	aroQ, qutE	157.712	111.194	1.41836
	peg.1757	K01965	propionyl-CoA carboxylase alpha chain [EC:6.4.1.3]	PCCA, pccA	57.4548	40.7853	1.40872
	peg.2141	K01955	carbamoyl-phosphate synthase large subunit [EC:6.3.5.5]	carB, CPA2	46.7517	33.9952	1.37524
	peg.402	K00215	4-hydroxy-tetrahydrodipicolinate reductase [EC:1.17.1.8]	dapB	128.141	94.3722	1.35783
	peg.466	K00024	malate dehydrogenase [EC:1.1.1.37]	mdh	134.42	103.25	1.3019
	peg.2242	K00384	thioredoxin reductase (NADPH) [EC:1.8.1.9]	trxB, TRR	49.3351	38.0189	1.29764
	peg.2373	K00031	isocitrate dehydrogenase [EC:1.1.1.42]	IDH1, IDH2, icd	70.3629	54.4509	1.29223
	peg.2235	K01255	leucyl aminopeptidase [EC:3.4.11.1]	CARP, pepA	54.0917	41.9638	1.28901
	peg.2883	K01626	3-deoxy-7-phosphoheptulonate synthase [EC:2.5.1.54]	E2.5.1.54, aroF, aroG, aroH	88.1476	68.9395	1.27862
	peg.651	K01738	cysteine synthase [EC:2.5.1.47]	cysK	111.267	87.773	1.26766
	peg.2997	K00145	N-acetyl-gamma-glutamyl-phosphate reductase [EC:1.2.1.38]	argC	32.7921	26.3381	1.24504
	peg.1861	K00812	aspartate aminotransferase [EC:2.6.1.1]	aspB	66.1646	53.3696	1.23974
	peg.2661	K00955	bifunctional enzyme CysN/CysC [EC:2.7.7.4 2.7.1.25]	cysNC	50.6032	41.1086	1.23096
	peg.1154	K01704	3-isopropylmalate/(R)-2-methylmalate dehydratase small subunit [EC:4.2.1.33 4.2.1.35]	leuD, IPMI-S	68.5491	56.7999	1.20685
	peg.2345	K01756	adenylosuccinate lyase [EC:4.3.2.2]	purB, ADSL	52.023	43.3514	1.20003
	peg.557	K00930	acetylglutamate kinase [EC:2.7.2.8]	argB	45.8218	38.8574	1.17923
	peg.3017	K00772	5'-methylthioadenosine phosphorylase [EC:2.4.2.28]	mtaP, MTAP	48.2684	42.4426	1.13726
	peg.1657	K01736	chorismate synthase [EC:4.2.3.5]	aroC	55.2975	50.3537	1.09818
	peg.155	K00821	acetylornithine/N-succinyldiaminopimelate aminotransferase [EC:2.6.1.11 2.6.1.17]	argD	43.7762	39.9114	1.09683
	peg.2081	K00820	glucosamine---fructose-6-phosphate aminotransferase (isomerizing) [EC:2.6.1.16]	glmS, GFPT	54.9143	51.6767	1.06265
	peg.3238	K05606	methylmalonyl-CoA/ethylmalonyl-CoA epimerase [EC:5.1.99.1]	MCEE, epi	138.378	133.358	1.03764
	peg.3497	K01696	tryptophan synthase beta chain [EC:4.2.1.20]	trpB	39.2338	38.195	1.0272
	peg.221	K01940	argininosuccinate synthase [EC:6.3.4.5]	argG, ASS1	57.0245	56.0559	1.01728
	peg.2660	K00957	sulfate adenylyltransferase subunit 2 [EC:2.7.7.4]	cysD	50.4785	49.75	1.01464
	peg.3123	K00265	glutamate synthase (NADPH) large chain [EC:1.4.1.13]	gltB	49.7471	49.5822	1.00333
	peg.167	K01693	imidazoleglycerol-phosphate dehydratase [EC:4.2.1.19]	hisB	57.5419	58.6971	0.98032
	peg.1146	K00384	thioredoxin reductase (NADPH) [EC:1.8.1.9]	trxB, TRR	74.266	77.3377	0.960283
	peg.3058	K01847	methylmalonyl-CoA mutase [EC:5.4.99.2]	MUT	45.8021	48.6502	0.941458
	peg.3067	K13821	RHH-type transcriptional regulator, proline utilization regulon repressor / proline dehydrogenase / delta 1-pyrroline-5-carboxylate dehydrogenase [EC:1.5.5.2 1.2.1.88]	putA	33.2731	35.4129	0.939576
	peg.154	K00611	ornithine carbamoyltransferase [EC:2.1.3.3]	OTC, argF, argI	43.7444	46.6197	0.938324
	peg.3496	K01695	tryptophan synthase alpha chain [EC:4.2.1.20]	trpA	63.888	68.9779	0.92621
	peg.3037	K03782	catalase-peroxidase [EC:1.11.1.21]	katG	103.286	112.361	0.919234
	peg.1720	K01939	adenylosuccinate synthase [EC:6.3.4.4]	purA, ADSS	45.2436	49.8837	0.906982
	peg.395	K01523	phosphoribosyl-ATP pyrophosphohydrolase [EC:3.6.1.31]	hisE	63.8963	70.9012	0.901203
	peg.2322	K00020	3-hydroxyisobutyrate dehydrogenase [EC:1.1.1.31]	mmsB, HIBADH	24.1805	27.0122	0.895167
	peg.213	K02502	ATP phosphoribosyltransferase regulatory subunit	hisZ	26.8533	30.0093	0.894834
	peg.1150	K01703	3-isopropylmalate/(R)-2-methylmalate dehydratase large subunit [EC:4.2.1.33 4.2.1.35]	leuC, IPMI-L	101.808	118.274	0.860783
	peg.1352	K00278	L-aspartate oxidase [EC:1.4.3.16]	nadB	35.1806	41.4099	0.849571
	peg.595	K00641	homoserine O-acetyltransferase/O-succinyltransferase [EC:2.3.1.31 2.3.1.46]	metX	47.9821	56.9941	0.841878
	peg.1114	K01733	threonine synthase [EC:4.2.3.1]	thrC	37.4702	44.6563	0.839079
	peg.2138	K01956	carbamoyl-phosphate synthase small subunit [EC:6.3.5.5]	carA, CPA1	39.6068	48.7855	0.811856
	peg.2500	K00548	5-methyltetrahydrofolate--homocysteine methyltransferase [EC:2.1.1.13]	metH, MTR	119.788	148.554	0.806365
	peg.3504	K00800	3-phosphoshikimate 1-carboxyvinyltransferase [EC:2.5.1.19]	aroA	33.7584	42.2767	0.798512
	peg.510	K00831	phosphoserine aminotransferase [EC:2.6.1.52]	serC, PSAT1	43.0865	55.0202	0.783102
	peg.406	K00133	aspartate-semialdehyde dehydrogenase [EC:1.2.1.11]	asd	63.6288	82.137	0.774666
	peg.3057	K01847	methylmalonyl-CoA mutase [EC:5.4.99.2]	MUT	17.9708	23.2105	0.774256
	peg.3375	K00865	glycerate 2-kinase [EC:2.7.1.165]	glxK, garK	36.1548	46.7897	0.772708
	peg.3329	K01924	UDP-N-acetylmuramate--alanine ligase [EC:6.3.2.8]	murC	33.9159	44.1387	0.768394
	peg.2768	K01581	ornithine decarboxylase [EC:4.1.1.17]	E4.1.1.17, ODC1, speC, speF	28.0141	36.9338	0.758495
	peg.2494	K00640	serine O-acetyltransferase [EC:2.3.1.30]	cysE	30.7228	40.5421	0.757799
	peg.3327	K01921	D-alanine-D-alanine ligase [EC:6.3.2.4]	ddl	56.1355	74.693	0.751551
	peg.2330	K00626	acetyl-CoA C-acetyltransferase [EC:2.3.1.9]	E2.3.1.9, atoB	31.9987	43.0847	0.742694
	peg.1678	K01657	anthranilate synthase component I [EC:4.1.3.27]	trpE	25.0831	34.0572	0.736499
	peg.2331	K01782	3-hydroxyacyl-CoA dehydrogenase / enoyl-CoA hydratase / 3-hydroxybutyryl-CoA epimerase [EC:1.1.1.35 4.2.1.17 5.1.2.3]	fadJ	39.3137	54.2849	0.724211
	peg.3267	K01919	glutamate--cysteine ligase [EC:6.3.2.2]	gshA	30.3892	42.4933	0.715154
	peg.2731	K00262	glutamate dehydrogenase (NADP+) [EC:1.4.1.4]	E1.4.1.4, gdhA	36.686	51.5213	0.712056
	peg.470	K00164	2-oxoglutarate dehydrogenase E1 component [EC:1.2.4.2]	OGDH, sucA	50.9953	72.1228	0.707062
	peg.1650	K01739	cystathionine gamma-synthase [EC:2.5.1.48]	metB	57.1899	80.9452	0.706525
	peg.1082	K00799	glutathione S-transferase [EC:2.5.1.18]	GST, gst	55.8415	79.49	0.702497
	peg.183	K01776	glutamate racemase [EC:5.1.1.3]	murI	24.8842	35.4991	0.700981
	peg.2725	K01649	2-isopropylmalate synthase [EC:2.3.3.13]	leuA, IMS	33.5481	47.9804	0.699204
	peg.3472	K00826	branched-chain amino acid aminotransferase [EC:2.6.1.42]	E2.6.1.42, ilvE	36.2326	52.1742	0.694454
	peg.656	K00928	aspartate kinase [EC:2.7.2.4]	lysC	33.1555	48.1431	0.688685
	peg.630	K00799	glutathione S-transferase [EC:2.5.1.18]	GST, gst	40.2607	58.9037	0.683501
	peg.3303	K10536	agmatine deiminase [EC:3.5.3.12]	aguA	18.8018	27.6847	0.679138
	peg.2260	K01609	indole-3-glycerol phosphate synthase [EC:4.1.1.48]	trpC	32.1476	47.3989	0.678234
	peg.2258	K01658	anthranilate synthase component II [EC:4.1.3.27]	trpG	48.0625	72.2733	0.66501
	peg.3308	K00147	glutamate-5-semialdehyde dehydrogenase [EC:1.2.1.41]	proA	34.0564	52.4096	0.649812
	peg.95	K01953	asparagine synthase (glutamine-hydrolysing) [EC:6.3.5.4]	asnB, ASNS	44.0461	68.9693	0.638634
	peg.3304	K12251	N-carbamoylputrescine amidase [EC:3.5.1.53]	aguB	48.83	77.0746	0.633542
	peg.2099	K00259	alanine dehydrogenase [EC:1.4.1.1]	ald	25.2147	39.9941	0.630459
	peg.472	K00382	dihydrolipoamide dehydrogenase [EC:1.8.1.4]	DLD, lpd, pdhD	34.1972	54.4909	0.627576
	peg.437	K01438	acetylornithine deacetylase [EC:3.5.1.16]	argE	29.8043	47.5963	0.62619
	peg.151	K01692	enoyl-CoA hydratase [EC:4.2.1.17]	paaF, echA	31.9371	51.0539	0.625557
	peg.2321	K01754	threonine dehydratase [EC:4.3.1.19]	E4.3.1.19, ilvA, tdcB	24.556	39.7903	0.617135
	peg.159	K02500	cyclase [EC:4.1.3.-]	hisF	26.9376	43.7497	0.615719
	peg.212	K00765	ATP phosphoribosyltransferase [EC:2.4.2.17]	hisG	29.2056	47.7215	0.611999
	peg.1972	K00817	histidinol-phosphate aminotransferase [EC:2.6.1.9]	hisC	44.3764	72.5472	0.61169
	peg.2361	K00128	aldehyde dehydrogenase (NAD+) [EC:1.2.1.3]	ALDH	28.144	46.5646	0.604408
	peg.398	K00052	3-isopropylmalate dehydrogenase [EC:1.1.1.85]	leuB, IMDH	28.3411	47.3346	0.59874
	peg.3197	K17103	CDP-diacylglycerol---serine O-phosphatidyltransferase [EC:2.7.8.8]	CHO1, pssA	32.9188	55.2044	0.596307
	peg.2942	K01740	O-acetylhomoserine (thiol)-lyase [EC:2.5.1.49]	metY	44.5365	74.7975	0.595427
	peg.444	K00674	2,3,4,5-tetrahydropyridine-2,6-dicarboxylate N-succinyltransferase [EC:2.3.1.117]	dapD	43.1502	73.8483	0.584309
	peg.1750	K01649	2-isopropylmalate synthase [EC:2.3.3.13]	leuA, IMS	23.0403	39.5506	0.582553
	peg.446	K01755	argininosuccinate lyase [EC:4.3.2.1]	argH, ASL	30.952	53.2493	0.581266
	peg.2774	K01652	acetolactate synthase I/II/III large subunit [EC:2.2.1.6]	E2.2.1.6L, ilvB, ilvG, ilvI	25.4025	44.3349	0.572969
	peg.448	K01586	diaminopimelate decarboxylase [EC:4.1.1.20]	lysA	27.144	47.4239	0.572369
	peg.412	K01778	diaminopimelate epimerase [EC:5.1.1.7]	dapF	37.8348	66.3068	0.570602
	peg.2273	K01915	glutamine synthetase [EC:6.3.1.2]	glnA, GLUL	24.6766	43.3146	0.569705
	peg.1070	K04518	prephenate dehydratase [EC:4.2.1.51]	pheA2	27.859	48.9959	0.568598
	peg.471	K00658	2-oxoglutarate dehydrogenase E2 component (dihydrolipoamide succinyltransferase) [EC:2.3.1.61]	DLST, sucB	28.1893	49.8285	0.565726
	peg.3332	K01925	UDP-N-acetylmuramoylalanine--D-glutamate ligase [EC:6.3.2.9]	murD	17.6413	31.6021	0.558232
	peg.2112	K01915	glutamine synthetase [EC:6.3.1.2]	glnA, GLUL	38.1	68.8007	0.553774
	peg.2259	K00766	anthranilate phosphoribosyltransferase [EC:2.4.2.18]	trpD	18.9855	34.699	0.547147
	peg.2581	K01760	cystathionine beta-lyase [EC:4.4.1.8]	metC	28.4453	53.0398	0.536301
	peg.1255	K00603	glutamate formiminotransferase [EC:2.1.2.5]	fctD	29.1363	54.7001	0.532655
	peg.1779	K00003	homoserine dehydrogenase [EC:1.1.1.3]	E1.1.1.3	20.6687	39.1407	0.528062
	peg.2301	K06167	phosphoribosyl 1,2-cyclic phosphate phosphodiesterase [EC:3.1.4.55]	phnP	17.1106	32.4928	0.526598
	peg.124	K01735	3-dehydroquinate synthase [EC:4.2.3.4]	aroB	39.4941	75.1705	0.525393
	peg.2229	K00824	D-alanine transaminase [EC:2.6.1.21]	dat	23.0488	44.0471	0.523277
	peg.3262	K13747	carboxynorspermidine decarboxylase [EC:4.1.1.96]	nspC	25.0611	48.9142	0.512347
	peg.3498	K01817	phosphoribosylanthranilate isomerase [EC:5.3.1.24]	trpF	23.6655	48.1143	0.49186
	peg.2303	K01874	methionyl-tRNA synthetase [EC:6.1.1.10]	MARS, metG	21.6459	45.9383	0.471196
	peg.85	K01953	asparagine synthase (glutamine-hydrolysing) [EC:6.3.5.4]	asnB, ASNS	30.0438	66.4112	0.45239
	peg.3068	K01918	pantoate--beta-alanine ligase [EC:6.3.2.1]	panC	20.7097	47.0587	0.440082
	peg.2278	K00304	sarcosine oxidase, subunit delta [EC:1.5.3.1]	soxD	26.0282	59.8976	0.434544
	peg.3335	K01929	UDP-N-acetylmuramoyl-tripeptide--D-alanyl-D-alanine ligase [EC:6.3.2.10]	murF	21.8419	50.5388	0.432182
	peg.2277	K00303	sarcosine oxidase, subunit beta [EC:1.5.3.1]	soxB	20.0194	46.9979	0.425963
	peg.3101	K11717	cysteine desulfurase / selenocysteine lyase [EC:2.8.1.7 4.4.1.16]	sufS	27.8248	65.7461	0.423216
	peg.1881	K01692	enoyl-CoA hydratase [EC:4.2.1.17]	paaF, echA	18.6072	44.4671	0.418449
	peg.1516	K00681	gamma-glutamyltranspeptidase / glutathione hydrolase [EC:2.3.2.2 3.4.19.13]	ggt	17.4849	41.9673	0.41663
	peg.3276	K00799	glutathione S-transferase [EC:2.5.1.18]	GST, gst	20.739	50.2493	0.412722
	peg.1123	K02204	homoserine kinase type II [EC:2.7.1.39]	thrB2	20.6426	50.5897	0.40804
	peg.2485	K01496	phosphoribosyl-AMP cyclohydrolase [EC:3.5.4.19]	hisI	41.9212	103.401	0.405422
	peg.2279	K00302	sarcosine oxidase, subunit alpha [EC:1.5.3.1]	soxA	15.4444	40.4121	0.382172
	peg.1736	K00432	glutathione peroxidase [EC:1.11.1.9]	gpx	37.7009	98.6546	0.382151
	peg.1217	K00558	DNA (cytosine-5)-methyltransferase 1 [EC:2.1.1.37]	DNMT1, dcm	29.8675	79.0089	0.378027
	peg.3336	K01928	UDP-N-acetylmuramoyl-L-alanyl-D-glutamate--2,6-diaminopimelate ligase [EC:6.3.2.13]	murE	14.0847	37.2816	0.377793
	peg.2506	K01256	aminopeptidase N [EC:3.4.11.2]	pepN	19.1326	50.6611	0.377659
	peg.443	K01439	succinyl-diaminopimelate desuccinylase [EC:3.5.1.18]	dapE	19.9659	53.2124	0.375211
	peg.2106	K00823	4-aminobutyrate aminotransferase [EC:2.6.1.19]	puuE	15.6272	41.7468	0.374332
	peg.2296	K01775	alanine racemase [EC:5.1.1.1]	alr	10.2246	27.6526	0.369754
	peg.379	K00014	shikimate dehydrogenase [EC:1.1.1.25]	aroE	17.3398	46.9244	0.369525
	peg.3510	K08963	methylthioribose-1-phosphate isomerase [EC:5.3.1.23]	mtnA	13.9221	37.996	0.366409
	peg.2922	K00382	dihydrolipoamide dehydrogenase [EC:1.8.1.4]	DLD, lpd, pdhD	19.0957	52.5472	0.363401
	peg.3307	K00931	glutamate 5-kinase [EC:2.7.2.11]	proB	16.3843	46.0889	0.355493
	peg.439	K10764	O-succinylhomoserine sulfhydrylase [EC:2.5.1.-]	metZ	28.4328	80.2047	0.354503
	peg.1081	K01255	leucyl aminopeptidase [EC:3.4.11.1]	CARP, pepA	12.1016	34.387	0.351924
	peg.509	K00058	D-3-phosphoglycerate dehydrogenase / 2-oxoglutarate reductase [EC:1.1.1.95 1.1.1.399]	serA, PHGDH	17.4588	49.7068	0.351237
	peg.2280	K00305	sarcosine oxidase, subunit gamma [EC:1.5.3.1]	soxG	16.2545	46.6686	0.348296
	peg.2618	K01735	3-dehydroquinate synthase [EC:4.2.3.4]	aroB	21.8691	62.8928	0.347721
	peg.2110	K12256	putrescine---pyruvate transaminase [EC:2.6.1.113]	spuC	18.0109	52.6886	0.341838
	peg.765	K01920	glutathione synthase [EC:6.3.2.3]	gshB	14.5219	44.6898	0.324949
	peg.589	K00220	cyclohexadieny/prephenate dehydrogenase [EC:1.3.1.43 1.3.1.12]	tyrC	17.2952	54.0543	0.319959
	peg.1097	K00620	glutamate N-acetyltransferase / amino-acid N-acetyltransferase [EC:2.3.1.35 2.3.1.1]	argJ	17.6106	55.4063	0.317844
	peg.125	K00891	shikimate kinase [EC:2.7.1.71]	E2.7.1.71, aroK, aroL	18.8096	61.6893	0.304909
	peg.2107	K00135	succinate-semialdehyde dehydrogenase / glutarate-semialdehyde dehydrogenase [EC:1.2.1.16 1.2.1.79 1.2.1.20]	gabD	13.7751	49.2264	0.27983
	peg.2108	K01915	glutamine synthetase [EC:6.3.1.2]	glnA, GLUL	14.482	53.0546	0.272963
	peg.2105	K00822	beta-alanine--pyruvate transaminase [EC:2.6.1.18]	E2.6.1.18	11.1433	41.948	0.265646
	peg.98	K01953	asparagine synthase (glutamine-hydrolysing) [EC:6.3.5.4]	asnB, ASNS	14.8266	57.6692	0.257097
	peg.2754	K01843	lysine 2,3-aminomutase [EC:5.4.3.2]	kamA	9.56211	37.9545	0.251936
	peg.1794	K00799	glutathione S-transferase [EC:2.5.1.18]	GST, gst	22.5185	93.8506	0.23994
	peg.3206	K01259	proline iminopeptidase [EC:3.4.11.5]	pip	11.9062	50.2917	0.236742
	peg.2075	K00383	glutathione reductase (NADPH) [EC:1.8.1.7]	GSR, gor	16.2366	69.9235	0.232205
	peg.2745	K01079	phosphoserine phosphatase [EC:3.1.3.3]	serB, PSPH	10.5573	46.1421	0.228799
	peg.2104	K00140	malonate-semialdehyde dehydrogenase (acetylating) / methylmalonate-semialdehyde dehydrogenase [EC:1.2.1.18 1.2.1.27]	mmsA, iolA, ALDH6A1	10.0716	47.0794	0.213928
	peg.2681	K01814	phosphoribosylformimino-5-aminoimidazole carboxamide ribotide isomerase [EC:5.3.1.16]	hisA	6.2439	35.6736	0.175028
	peg.3371	K01469	5-oxoprolinase (ATP-hydrolysing) [EC:3.5.2.9]	OPLAH, OXP1, oplAH	5.69057	33.723	0.168744
	peg.588	K07232	glutathione-specific gamma-glutamylcyclotransferase [EC:4.3.2.7]	CHAC, chaC	7.62495	45.1909	0.168727
	peg.590	K00817	histidinol-phosphate aminotransferase [EC:2.6.1.9]	hisC	12.7255	76.6423	0.166037
	peg.174	K01259	proline iminopeptidase [EC:3.4.11.5]	pip	8.28158	63.2272	0.130981
	peg.1416	K00382	dihydrolipoamide dehydrogenase [EC:1.8.1.4]	DLD, lpd, pdhD	3.14184	28.6469	0.109675
	peg.291	K00382	dihydrolipoamide dehydrogenase [EC:1.8.1.4]	DLD, lpd, pdhD	4.1365	47.736	0.0866538
	peg.2764	K01738	cysteine synthase [EC:2.5.1.47]	cysK	3.41133	40.9271	0.0833513
	peg.930	K00626	acetyl-CoA C-acetyltransferase [EC:2.3.1.9]	E2.3.1.9, atoB	3.51126	43.0016	0.0816542
	peg.2763	K11717	cysteine desulfurase / selenocysteine lyase [EC:2.8.1.7 4.4.1.16]	sufS	2.19423	31.9553	0.0686656
	peg.2761	K00640	serine O-acetyltransferase [EC:2.3.1.30]	cysE	1.44671	44.9276	0.0322009
09107 Glycan biosynthesis and metabolism
00531 Glycosaminoglycan degradation [PATH:ko00531]
00540 Lipopolysaccharide biosynthesis [PATH:ko00540]
00550 Peptidoglycan biosynthesis [PATH:ko00550]
	peg.3323	K02535	UDP-3-O-[3-hydroxymyristoyl] N-acetylglucosamine deacetylase [EC:3.5.1.108]	lpxC	742.47	102.878	7.21697
	peg.101	K06041	arabinose-5-phosphate isomerase [EC:5.3.1.13]	kdsD, kpsF	36.7828	34.5259	1.06537
	peg.2790	K02536	UDP-3-O-[3-hydroxymyristoyl] glucosamine N-acyltransferase [EC:2.3.1.191]	lpxD	51.4447	54.2433	0.948408
	peg.1051	K05366	penicillin-binding protein 1A [EC:2.4.1.129 3.4.16.4]	mrcA	57.0862	61.8127	0.923536
	peg.2160	K07258	serine-type D-Ala-D-Ala carboxypeptidase (penicillin-binding protein 5/6) [EC:3.4.16.4]	dacC, dacA, dacD	43.8482	50.1029	0.875162
	peg.2792	K00677	UDP-N-acetylglucosamine acyltransferase [EC:2.3.1.129]	lpxA	39.6853	46.4189	0.854938
	peg.2271	K00748	lipid-A-disaccharide synthase [EC:2.4.1.182]	lpxB	24.7754	29.0325	0.853369
	peg.2177	K02527	3-deoxy-D-manno-octulosonic-acid transferase [EC:2.4.99.12 2.4.99.13 2.4.99.14 2.4.99.15]	kdtA, waaA	30.1935	35.5097	0.850289
	peg.3329	K01924	UDP-N-acetylmuramate--alanine ligase [EC:6.3.2.8]	murC	33.9159	44.1387	0.768394
	peg.3327	K01921	D-alanine-D-alanine ligase [EC:6.3.2.4]	ddl	56.1355	74.693	0.751551
	peg.1931	K01207	beta-N-acetylhexosaminidase [EC:3.2.1.52]	nagZ	23.8109	32.5247	0.732085
	peg.2256	K01627	2-dehydro-3-deoxyphosphooctonate aldolase (KDO 8-P synthase) [EC:2.5.1.55]	kdsA	44.699	63.7777	0.700856
	peg.631	K06153	undecaprenyl-diphosphatase [EC:3.6.1.27]	bacA	55.4247	80.3346	0.689923
	peg.452	K05367	penicillin-binding protein 1C [EC:2.4.1.129]	pbpC	49.5519	74.0845	0.668856
	peg.2541	K05366	penicillin-binding protein 1A [EC:2.4.1.129 3.4.16.4]	mrcA	35.4981	55.0559	0.644765
	peg.3328	K00075	UDP-N-acetylmuramate dehydrogenase [EC:1.3.1.98]	murB	33.5645	54.2403	0.618811
	peg.3332	K01925	UDP-N-acetylmuramoylalanine--D-glutamate ligase [EC:6.3.2.9]	murD	17.6413	31.6021	0.558232
	peg.50	K00790	UDP-N-acetylglucosamine 1-carboxyvinyltransferase [EC:2.5.1.7]	murA	26.6529	49.4285	0.539221
	peg.3382	K03587	cell division protein FtsI (penicillin-binding protein 3) [EC:3.4.16.4]	ftsI	20.4218	40.1002	0.50927
	peg.2178	K00912	tetraacyldisaccharide 4'-kinase [EC:2.7.1.130]	lpxK	11.0066	24.0236	0.458157
	peg.3335	K01929	UDP-N-acetylmuramoyl-tripeptide--D-alanyl-D-alanine ligase [EC:6.3.2.10]	murF	21.8419	50.5388	0.432182
	peg.3336	K01928	UDP-N-acetylmuramoyl-L-alanyl-D-glutamate--2,6-diaminopimelate ligase [EC:6.3.2.13]	murE	14.0847	37.2816	0.377793
	peg.1071	K00979	3-deoxy-manno-octulosonate cytidylyltransferase (CMP-KDO synthetase) [EC:2.7.7.38]	kdsB	19.8618	58.5152	0.339429
	peg.2836	K02517	Kdo2-lipid IVA lauroyltransferase [EC:2.3.1.241]	lpxL, htrB	11.825	35.5354	0.332766
	peg.3330	K02563	UDP-N-acetylglucosamine--N-acetylmuramyl-(pentapeptide) pyrophosphoryl-undecaprenol N-acetylglucosamine transferase [EC:2.4.1.227]	murG	13.7068	49.6459	0.276091
	peg.3546	K05366	penicillin-binding protein 1A [EC:2.4.1.129 3.4.16.4]	mrcA	12.0203	44.134	0.272359
	peg.3334	K01000	phospho-N-acetylmuramoyl-pentapeptide-transferase [EC:2.7.8.13]	mraY	23.2383	101.558	0.228818
	peg.608	K03814	monofunctional glycosyltransferase [EC:2.4.1.129]	mtgA	11.6884	90.9526	0.12851
09108 Metabolism of cofactors and vitamins
00730 Thiamine metabolism [PATH:ko00730]
00740 Riboflavin metabolism [PATH:ko00740]
00750 Vitamin B6 metabolism [PATH:ko00750]
00760 Nicotinate and nicotinamide metabolism [PATH:ko00760]
00770 Pantothenate and CoA biosynthesis [PATH:ko00770]
00780 Biotin metabolism [PATH:ko00780]
00785 Lipoic acid metabolism [PATH:ko00785]
00790 Folate biosynthesis [PATH:ko00790]
00670 One carbon pool by folate [PATH:ko00670]
00860 Porphyrin and chlorophyll metabolism [PATH:ko00860]
00130 Ubiquinone and other terpenoid-quinone biosynthesis [PATH:ko00130]
	peg.1478	K02372	3-hydroxyacyl-[acyl-carrier-protein] dehydratase [EC:4.2.1.59]	fabZ	1193.27	211.35	5.64594
	peg.1477	K09458	3-oxoacyl-[acyl-carrier-protein] synthase II [EC:2.3.1.179]	fabF	424.589	84.9444	4.99844
	peg.1491	K03153	glycine oxidase [EC:1.4.3.19]	thiO	313.57	72.6225	4.31781
	peg.1885	K00643	5-aminolevulinate synthase [EC:2.3.1.37]	E2.3.1.37, ALAS	660.439	178.114	3.70795
	peg.1474	K09458	3-oxoacyl-[acyl-carrier-protein] synthase II [EC:2.3.1.179]	fabF	275.369	75.0823	3.66757
	peg.1886	K00600	glycine hydroxymethyltransferase [EC:2.1.2.1]	glyA, SHMT	278.796	78.193	3.56549
	peg.1489	K00831	phosphoserine aminotransferase [EC:2.6.1.52]	serC, PSAT1	237.525	68.5597	3.46449
	peg.3219	K01938	formate--tetrahydrofolate ligase [EC:6.3.4.3]	fhs	262.996	77.8572	3.37794
	peg.1582	K02495	oxygen-independent coproporphyrinogen III oxidase [EC:1.3.98.3]	hemN, hemZ	228.613	74.4218	3.07185
	peg.1476	K09458	3-oxoacyl-[acyl-carrier-protein] synthase II [EC:2.3.1.179]	fabF	278.249	96.4639	2.88449
	peg.3015	K03594	bacterioferritin [EC:1.16.3.1]	bfr	253.127	88.0245	2.87564
	peg.2311	K00325	NAD(P) transhydrogenase subunit beta [EC:1.6.1.2]	pntB	273.091	97.2585	2.80789
	peg.2742	K01652	acetolactate synthase I/II/III large subunit [EC:2.2.1.6]	E2.2.1.6L, ilvB, ilvG, ilvI	137.026	49.3338	2.77752
	peg.1480	K00059	3-oxoacyl-[acyl-carrier protein] reductase [EC:1.1.1.100]	fabG	202.308	74.3269	2.72187
	peg.1473	K09458	3-oxoacyl-[acyl-carrier-protein] synthase II [EC:2.3.1.179]	fabF	269.001	100.771	2.66944
	peg.1351	K03517	quinolinate synthase [EC:2.5.1.72]	nadA	258.545	100.756	2.56606
	peg.2737	K00053	ketol-acid reductoisomerase [EC:1.1.1.86]	ilvC	149.251	63.0205	2.36829
	peg.1496	K03186	flavin prenyltransferase [EC:2.5.1.129]	ubiX, bsdB, PAD1	90.3855	38.215	2.36518
	peg.1456	K02234	cobalamin biosynthesis protein CobW	cobW	88.7431	42.2718	2.09935
	peg.1514	K03183	demethylmenaquinone methyltransferase / 2-methoxy-6-polyprenyl-1,4-benzoquinol methylase [EC:2.1.1.163 2.1.1.201]	ubiE	109.725	55.9009	1.96286
	peg.759	K01491	methylenetetrahydrofolate dehydrogenase (NADP+) / methenyltetrahydrofolate cyclohydrolase [EC:1.5.1.5 3.5.4.9]	folD	155.154	80.4356	1.92892
	peg.1922	K01687	dihydroxy-acid dehydratase [EC:4.2.1.9]	ilvD	147.648	77.3813	1.90805
	peg.2285	K09458	3-oxoacyl-[acyl-carrier-protein] synthase II [EC:2.3.1.179]	fabF	96.6103	51.376	1.88046
	peg.185	K00647	3-oxoacyl-[acyl-carrier-protein] synthase I [EC:2.3.1.41]	fabB	159.609	85.5357	1.866
	peg.1495	K03182	4-hydroxy-3-polyprenylbenzoate decarboxylase [EC:4.1.1.98]	ubiD	64.856	36.8602	1.75951
	peg.2847	K00939	adenylate kinase [EC:2.7.4.3]	adk, AK	172.962	99.819	1.73276
	peg.2498	K00548	5-methyltetrahydrofolate--homocysteine methyltransferase [EC:2.1.1.13]	metH, MTR	73.1283	44.4473	1.64528
	peg.2740	K01653	acetolactate synthase I/III small subunit [EC:2.2.1.6]	E2.2.1.6S, ilvH, ilvN	95.854	59.0327	1.62375
	peg.1659	K00208	enoyl-[acyl-carrier protein] reductase I [EC:1.3.1.9 1.3.1.10]	fabI	92.1437	62.9747	1.46319
	peg.2287	K00059	3-oxoacyl-[acyl-carrier protein] reductase [EC:1.1.1.100]	fabG	74.3287	51.1081	1.45434
	peg.120	K09882	cobaltochelatase CobS [EC:6.6.1.2]	cobS	98.259	74.5709	1.31766
	peg.1890	K14652	3,4-dihydroxy 2-butanone 4-phosphate synthase / GTP cyclohydrolase II [EC:4.1.99.12 3.5.4.25]	ribBA	38.2283	29.8244	1.28178
	peg.2791	K02372	3-hydroxyacyl-[acyl-carrier-protein] dehydratase [EC:4.2.1.59]	fabZ	78.8564	63.4342	1.24312
	peg.2023	K00954	pantetheine-phosphate adenylyltransferase [EC:2.7.7.3]	E2.7.7.3A, coaD, kdtB	56.6151	45.8058	1.23598
	peg.2686	K01633	7,8-dihydroneopterin aldolase/epimerase/oxygenase [EC:4.1.2.25 5.1.99.8 1.13.11.81]	folB	44.1713	36.5333	1.20907
	peg.184	K00208	enoyl-[acyl-carrier protein] reductase I [EC:1.3.1.9 1.3.1.10]	fabI	101.579	84.6168	1.20045
	peg.2204	K09457	7-cyano-7-deazaguanine reductase [EC:1.7.1.13]	queF	79.3009	68.1802	1.16311
	peg.571	K03639	GTP 3',8-cyclase [EC:4.1.99.22]	moaA, CNX2	87.9902	75.9118	1.15911
	peg.1683	K00788	thiamine-phosphate pyrophosphorylase [EC:2.5.1.3]	thiE	48.1092	41.9529	1.14674
	peg.2261	K03637	cyclic pyranopterin monophosphate synthase [EC:4.6.1.17]	moaC, CNX3	46.8465	41.3008	1.13428
	peg.566	K00606	3-methyl-2-oxobutanoate hydroxymethyltransferase [EC:2.1.2.11]	panB	62.0422	56.5599	1.09693
	peg.2205	K01737	6-pyruvoyltetrahydropterin/6-carboxytetrahydropterin synthase [EC:4.2.3.12 4.1.2.50]	queD, ptpS, PTS	56.1006	51.1502	1.09678
	peg.3150	K03474	pyridoxine 5-phosphate synthase [EC:2.6.99.2]	pdxJ	52.4935	48.0989	1.09136
	peg.3385	K01662	1-deoxy-D-xylulose-5-phosphate synthase [EC:2.2.1.7]	dxs	69.8834	66.8226	1.0458
	peg.1939	K03787	5'-nucleotidase [EC:3.1.3.5]	surE	51.1215	49.4186	1.03446
	peg.3274	K03179	4-hydroxybenzoate polyprenyltransferase [EC:2.5.1.39]	ubiA	44.5516	43.3403	1.02795
	peg.1879	K01698	porphobilinogen synthase [EC:4.2.1.24]	hemB, ALAD	58.7296	61.1422	0.960542
	peg.3191	K00560	thymidylate synthase [EC:2.1.1.45]	thyA, TYMS	49.2276	51.63	0.953468
	peg.3149	K00997	holo-[acyl-carrier protein] synthase [EC:2.7.8.7]	acpS	39.449	41.4071	0.952713
	peg.2218	K03644	lipoyl synthase [EC:2.8.1.8]	lipA	39.7127	43.1719	0.919874
	peg.1891	K00794	6,7-dimethyl-8-ribityllumazine synthase [EC:2.5.1.78]	ribH, RIB4	42.353	48.0585	0.88128
	peg.1661	K00275	pyridoxamine 5'-phosphate oxidase [EC:1.4.3.5]	pdxH, PNPO	56.6515	64.9846	0.871769
	peg.2672	K00950	2-amino-4-hydroxy-6-hydroxymethyldihydropteridine diphosphokinase [EC:2.7.6.3]	folK	30.7558	35.3563	0.869884
	peg.655	K00568	2-polyprenyl-6-hydroxyphenyl methylase / 3-demethylubiquinone-9 3-methyltransferase [EC:2.1.1.222 2.1.1.64]	ubiG	75.1426	86.9296	0.864408
	peg.496	K00798	cob(I)alamin adenosyltransferase [EC:2.5.1.17]	MMAB, pduO	53.868	62.4957	0.861947
	peg.1352	K00278	L-aspartate oxidase [EC:1.4.3.16]	nadB	35.1806	41.4099	0.849571
	peg.2221	K03743	nicotinamide-nucleotide amidase [EC:3.5.1.42]	pncC	45.6232	54.0406	0.84424
	peg.1114	K01733	threonine synthase [EC:4.2.3.1]	thrC	37.4702	44.6563	0.839079
	peg.1185	K03342	para-aminobenzoate synthetase / 4-amino-4-deoxychorismate lyase [EC:2.6.1.85 4.1.3.38]	pabBC	45.3083	54.4562	0.832014
	peg.2500	K00548	5-methyltetrahydrofolate--homocysteine methyltransferase [EC:2.1.1.13]	metH, MTR	119.788	148.554	0.806365
	peg.510	K00831	phosphoserine aminotransferase [EC:2.6.1.52]	serC, PSAT1	43.0865	55.0202	0.783102
	peg.2733	K00059	3-oxoacyl-[acyl-carrier protein] reductase [EC:1.1.1.100]	fabG	59.8854	80.0887	0.747739
	peg.1651	K00077	2-dehydropantoate 2-reductase [EC:1.1.1.169]	panE, apbA	43.5769	59.3961	0.733665
	peg.2206	K10026	7-carboxy-7-deazaguanine synthase [EC:4.3.99.3]	queE	50.7354	69.8241	0.726616
	peg.2879	K01916	NAD+ synthase [EC:6.3.1.5]	nadE	21.3387	29.9301	0.712951
	peg.2262	K03750	molybdopterin molybdotransferase [EC:2.10.1.1]	moeA	24.7366	34.9658	0.707452
	peg.1326	K11175	phosphoribosylglycinamide formyltransferase 1 [EC:2.1.2.2]	purN	36.2969	51.5413	0.70423
	peg.2571	K00858	NAD+ kinase [EC:2.7.1.23]	ppnK, NADK	36.1879	52.0268	0.695563
	peg.3472	K00826	branched-chain amino acid aminotransferase [EC:2.6.1.42]	E2.6.1.42, ilvE	36.2326	52.1742	0.694454
	peg.1108	K02257	heme o synthase [EC:2.5.1.141]	COX10, ctaB, cyoE	79.2753	117.536	0.674477
	peg.396	K00867	type I pantothenate kinase [EC:2.7.1.33]	coaA	35.595	52.9085	0.672765
	peg.2644	K02303	uroporphyrin-III C-methyltransferase [EC:2.1.1.107]	cobA	33.0703	49.5265	0.66773
	peg.3192	K00287	dihydrofolate reductase [EC:1.5.1.3]	DHFR, folA	37.3213	56.2374	0.663638
	peg.1739	K03147	phosphomethylpyrimidine synthase [EC:4.1.99.17]	thiC	44.4356	67.5197	0.658114
	peg.1164	K01495	GTP cyclohydrolase IA [EC:3.5.4.16]	GCH1, folE	86.5793	133.329	0.649364
	peg.2835	K03185	2-octaprenyl-6-methoxyphenol hydroxylase [EC:1.14.13.-]	ubiH	26.0238	40.4268	0.643727
	peg.2989	K14652	3,4-dihydroxy 2-butanone 4-phosphate synthase / GTP cyclohydrolase II [EC:4.1.99.12 3.5.4.25]	ribBA	43.9011	69.22	0.634226
	peg.2185	K00788	thiamine-phosphate pyrophosphorylase [EC:2.5.1.3]	thiE	26.855	43.088	0.623259
	peg.3494	K11754	dihydrofolate synthase / folylpolyglutamate synthase [EC:6.3.2.12 6.3.2.17]	folC	33.1322	54.5901	0.606927
	peg.1689	K01934	5-formyltetrahydrofolate cyclo-ligase [EC:6.3.3.2]	MTHFS	45.7501	78.9122	0.57976
	peg.2186	K03149	thiazole synthase [EC:2.8.1.10]	thiG	31.0139	53.5772	0.578863
	peg.3240	K03524	BirA family transcriptional regulator, biotin operon repressor / biotin---[acetyl-CoA-carboxylase] ligase [EC:6.3.4.15]	birA	27.966	48.4446	0.577279
	peg.649	K13038	phosphopantothenoylcysteine decarboxylase / phosphopantothenate---cysteine ligase [EC:4.1.1.36 6.3.2.5]	coaBC, dfp	29.3383	50.8309	0.577175
	peg.2673	K01724	4a-hydroxytetrahydrobiopterin dehydratase [EC:4.2.1.96]	PCBD, phhB	57.9845	100.866	0.574868
	peg.1102	K01012	biotin synthase [EC:2.8.1.6]	bioB	65.2428	113.653	0.574052
	peg.2774	K01652	acetolactate synthase I/II/III large subunit [EC:2.2.1.6]	E2.2.1.6L, ilvB, ilvG, ilvI	25.4025	44.3349	0.572969
	peg.1238	K01495	GTP cyclohydrolase IA [EC:3.5.4.16]	GCH1, folE	28.0664	49.3128	0.56915
	peg.118	K09883	cobaltochelatase CobT [EC:6.6.1.2]	cobT	23.8205	42.8269	0.556204
	peg.2501	K00297	methylenetetrahydrofolate reductase (NADPH) [EC:1.5.1.20]	metF, MTHFR	173.24	312.344	0.554644
	peg.3434	K06133	4'-phosphopantetheinyl transferase [EC:2.7.8.-]	LYS5, acpT	41.6374	75.0751	0.554609
	peg.234	K00602	phosphoribosylaminoimidazolecarboxamide formyltransferase / IMP cyclohydrolase [EC:2.1.2.3 3.5.4.10]	purH	34.5951	62.4446	0.554013
	peg.1069	K00059	3-oxoacyl-[acyl-carrier protein] reductase [EC:1.1.1.100]	fabG	16.6456	30.187	0.551416
	peg.382	K01599	uroporphyrinogen decarboxylase [EC:4.1.1.37]	hemE, UROD	38.6029	71.1825	0.542309
	peg.1255	K00603	glutamate formiminotransferase [EC:2.1.2.5]	fctD	29.1363	54.7001	0.532655
	peg.1371	K03635	molybdopterin synthase catalytic subunit [EC:2.8.1.12]	MOCS2B, moaE	57.0214	107.917	0.52838
	peg.1801	K07141	molybdenum cofactor cytidylyltransferase [EC:2.7.7.76]	mocA	28.8778	56.9088	0.507441
	peg.1889	K00793	riboflavin synthase [EC:2.5.1.9]	ribE, RIB5	26.5443	52.7468	0.503239
	peg.2829	K03831	molybdopterin adenylyltransferase [EC:2.7.7.75]	mogA	34.3377	68.7353	0.499564
	peg.1353	K00767	nicotinate-nucleotide pyrophosphorylase (carboxylating) [EC:2.4.2.19]	nadC, QPRT	20.4759	41.5685	0.492582
	peg.3377	K00287	dihydrofolate reductase [EC:1.5.1.3]	DHFR, folA	27.3264	56.4281	0.48427
	peg.3271	K11753	riboflavin kinase / FMN adenylyltransferase [EC:2.7.1.26 2.7.7.2]	ribF	12.8316	26.6239	0.481956
	peg.1455	K02230	cobaltochelatase CobN [EC:6.6.1.2]	cobN	18.5941	38.9496	0.477389
	peg.2240	K00097	4-hydroxythreonine-4-phosphate dehydrogenase [EC:1.1.1.262]	pdxA	20.045	42.2035	0.474961
	peg.244	K01719	uroporphyrinogen-III synthase [EC:4.2.1.75]	hemD, UROS	19.2765	40.8468	0.471922
	peg.421	K03185	2-octaprenyl-6-methoxyphenol hydroxylase [EC:1.14.13.-]	ubiH	14.3612	30.6732	0.468201
	peg.1893	K00946	thiamine-monophosphate kinase [EC:2.7.4.16]	thiL	23.847	51.2488	0.465319
	peg.358	K00868	pyridoxine kinase [EC:2.7.1.35]	pdxK, pdxY	19.7685	43.7835	0.451505
	peg.1450	K05895	precorrin-6A/cobalt-precorrin-6A reductase [EC:1.3.1.54 1.3.1.106]	cobK-cbiJ	16.9089	37.4945	0.45097
	peg.2643	K04719	5,6-dimethylbenzimidazole synthase [EC:1.13.11.79]	bluB	11.2796	25.0656	0.450002
	peg.2269	K01885	glutamyl-tRNA synthetase [EC:6.1.1.17]	EARS, gltX	18.9519	42.2064	0.449029
	peg.3068	K01918	pantoate--beta-alanine ligase [EC:6.3.2.1]	panC	20.7097	47.0587	0.440082
	peg.1755	K01885	glutamyl-tRNA synthetase [EC:6.1.1.17]	EARS, gltX	21.728	49.7891	0.436402
	peg.1449	K00595	precorrin-6Y C5,15-methyltransferase (decarboxylating) [EC:2.1.1.132]	cobL	11.7132	29.9349	0.391288
	peg.3039	K00228	coproporphyrinogen III oxidase [EC:1.3.3.3]	CPOX, hemF	20.43	53.409	0.38252
	peg.378	K00859	dephospho-CoA kinase [EC:2.7.1.24]	coaE	18.6217	49.1395	0.378956
	peg.1799	K02226	alpha-ribazole phosphatase [EC:3.1.3.73]	cobC, phpB	14.0986	38.1937	0.369136
	peg.2250	K00941	hydroxymethylpyrimidine/phosphomethylpyrimidine kinase [EC:2.7.1.49 2.7.4.7]	thiD	18.2622	49.6644	0.367712
	peg.1762	K03801	lipoyl(octanoyl) transferase [EC:2.3.1.181]	lipB	20.6607	56.4964	0.365699
	peg.1452	K03394	precorrin-2/cobalt-factor-2 C20-methyltransferase [EC:2.1.1.130 2.1.1.151]	cobI-cbiL	16.3242	44.9111	0.363479
	peg.1800	K00768	nicotinate-nucleotide--dimethylbenzimidazole phosphoribosyltransferase [EC:2.4.2.21]	E2.4.2.21, cobU, cobT	27.2932	75.1466	0.3632
	peg.245	K01749	hydroxymethylbilane synthase [EC:2.5.1.61]	hemC, HMBS	23.5009	65.2957	0.359916
	peg.2616	K03179	4-hydroxybenzoate polyprenyltransferase [EC:2.5.1.39]	ubiA	10.4433	29.0689	0.359259
	peg.1168	K00604	methionyl-tRNA formyltransferase [EC:2.1.2.9]	MTFMT, fmt	12.3376	35.9235	0.34344
	peg.2190	K01772	protoporphyrin/coproporphyrin ferrochelatase [EC:4.99.1.1 4.99.1.9]	hemH, FECH	24.3277	71.1994	0.341684
	peg.1458	K19221	cob(I)alamin adenosyltransferase [EC:2.5.1.17]	cobA, btuR	37.3442	112.373	0.332324
	peg.1448	K02189	cobalt-precorrin 5A hydrolase [EC:3.7.1.12]	cbiG	12.02	36.9914	0.324941
	peg.2645	K02227	adenosylcobinamide-phosphate synthase [EC:6.3.1.10]	cbiB, cobD	12.5973	38.771	0.324916
	peg.1459	K02232	adenosylcobyric acid synthase [EC:6.3.5.10]	cobQ, cbiP	15.194	47.7401	0.318265
	peg.3097	K04487	cysteine desulfurase [EC:2.8.1.7]	iscS, NFS1	13.5579	44.0048	0.308101
	peg.1454	K02229	precorrin-3B synthase [EC:1.14.13.83]	cobG	12.079	39.5239	0.305614
	peg.1099	K00833	adenosylmethionine---8-amino-7-oxononanoate aminotransferase [EC:2.6.1.62]	bioA	11.3333	37.6931	0.300673
	peg.1451	K05934	precorrin-3B C17-methyltransferase [EC:2.1.1.131]	E2.1.1.131, cobJ, cbiH	11.2758	37.6929	0.29915
	peg.1716	K00796	dihydropteroate synthase [EC:2.5.1.15]	folP	8.89732	30.0661	0.295925
	peg.2209	K06920	7-cyano-7-deazaguanine synthase [EC:6.3.4.20]	queC	11.7127	40.3798	0.290065
	peg.2998	K02259	cytochrome c oxidase assembly protein subunit 15	COX15, ctaA	13.6062	47.3183	0.287547
	peg.1798	K02233	adenosylcobinamide-GDP ribazoletransferase [EC:2.7.8.26]	E2.7.8.26, cobS, cobV	9.29872	32.671	0.284617
	peg.2107	K00135	succinate-semialdehyde dehydrogenase / glutarate-semialdehyde dehydrogenase [EC:1.2.1.16 1.2.1.79 1.2.1.20]	gabD	13.7751	49.2264	0.27983
	peg.2233	K04765	nucleoside triphosphate diphosphatase [EC:3.6.1.9]	mazG	9.52636	34.6564	0.27488
	peg.1100	K01935	dethiobiotin synthetase [EC:6.3.3.3]	bioD	10.0222	38.7615	0.25856
	peg.1453	K06042	precorrin-8X/cobalt-precorrin-8 methylmutase [EC:5.4.99.61 5.4.99.60]	cobH-cbiC	14.3374	55.9043	0.256464
	peg.1445	K02228	precorrin-6A synthase [EC:2.1.1.152]	cobF	13.2875	52.7328	0.251979
	peg.1444	K02303	uroporphyrin-III C-methyltransferase [EC:2.1.1.107]	cobA	10.792	46.0897	0.234151
	peg.1797	K02227	adenosylcobinamide-phosphate synthase [EC:6.3.1.10]	cbiB, cobD	4.9357	22.1909	0.22242
	peg.3312	K00969	nicotinate-nucleotide adenylyltransferase [EC:2.7.7.18]	nadD	6.43298	30.833	0.208639
	peg.1796	K02231	adenosylcobinamide kinase / adenosylcobinamide-phosphate guanylyltransferase [EC:2.7.1.156 2.7.7.62]	cobP, cobU	9.38643	47.0603	0.199455
	peg.1515	K03153	glycine oxidase [EC:1.4.3.19]	thiO	7.72223	38.7492	0.199287
	peg.1101	K00652	8-amino-7-oxononanoate synthase [EC:2.3.1.47]	bioF	10.6209	53.6277	0.198048
	peg.1888	K11752	diaminohydroxyphosphoribosylaminopyrimidine deaminase / 5-amino-6-(5-phosphoribosylamino)uracil reductase [EC:3.5.4.26 1.1.1.193]	ribD	9.80348	53.3002	0.18393
	peg.1245	K02230	cobaltochelatase CobN [EC:6.6.1.2]	cobN	8.22937	46.6834	0.17628
	peg.1447	K05936	precorrin-4/cobalt-precorrin-4 C11-methyltransferase [EC:2.1.1.133 2.1.1.271]	cobM, cbiF	6.36197	42.073	0.151213
	peg.1446	K02224	cobyrinic acid a,c-diamide synthase [EC:6.3.5.9 6.3.5.11]	cobB-cbiA	9.49888	71.1787	0.133451
	peg.929	K09458	3-oxoacyl-[acyl-carrier-protein] synthase II [EC:2.3.1.179]	fabF	5.90946	47.3764	0.124734
	peg.3302	K03743	nicotinamide-nucleotide amidase [EC:3.5.1.42]	pncC	5.86068	61.4665	0.0953475
	peg.1548	K03795	sirohydrochlorin cobaltochelatase [EC:4.99.1.3]	cbiX	5.0012	63.6976	0.0785147
	peg.1260	K00297	methylenetetrahydrofolate reductase (NADPH) [EC:1.5.1.20]	metF, MTHFR	4.3996	71.7754	0.0612967
	peg.1259	K11754	dihydrofolate synthase / folylpolyglutamate synthase [EC:6.3.2.12 6.3.2.17]	folC	2.50759	42.8164	0.0585661
	peg.282	K03644	lipoyl synthase [EC:2.8.1.8]	lipA	3.38814	73.8655	0.0458691
	peg.1257	K01938	formate--tetrahydrofolate ligase [EC:6.3.4.3]	fhs	1.63391	48.2012	0.0338977
09109 Metabolism of terpenoids and polyketides
00900 Terpenoid backbone biosynthesis [PATH:ko00900]
	peg.3385	K01662	1-deoxy-D-xylulose-5-phosphate synthase [EC:2.2.1.7]	dxs	69.8834	66.8226	1.0458
	peg.2783	K00099	1-deoxy-D-xylulose-5-phosphate reductoisomerase [EC:1.1.1.267]	dxr	11.1196	32.8794	0.338194
	peg.2223	K12506	2-C-methyl-D-erythritol 4-phosphate cytidylyltransferase / 2-C-methyl-D-erythritol 2,4-cyclodiphosphate synthase [EC:2.7.7.60 4.6.1.12]	ispDF	14.5779	37.3287	0.390529
	peg.1311	K00919	4-diphosphocytidyl-2-C-methyl-D-erythritol kinase [EC:2.7.1.148]	ispE	34.939	42.9385	0.813698
	peg.613	K03526	(E)-4-hydroxy-3-methylbut-2-enyl-diphosphate synthase [EC:1.17.7.1 1.17.7.3]	gcpE, ispG	32.477	50.5241	0.642803
	peg.1124	K03527	4-hydroxy-3-methylbut-2-en-1-yl diphosphate reductase [EC:1.17.7.4]	ispH, lytB	121.974	98.1982	1.24212
	peg.603	K00626	acetyl-CoA C-acetyltransferase [EC:2.3.1.9]	E2.3.1.9, atoB	415.623	151.813	2.73773
	peg.930	K00626	acetyl-CoA C-acetyltransferase [EC:2.3.1.9]	E2.3.1.9, atoB	3.51126	43.0016	0.0816542
	peg.2330	K00626	acetyl-CoA C-acetyltransferase [EC:2.3.1.9]	E2.3.1.9, atoB	31.9987	43.0847	0.742694
	peg.2623	K01823	isopentenyl-diphosphate Delta-isomerase [EC:5.3.3.2]	idi, IDI	16.6678	62.9681	0.264703
	peg.610	K00795	farnesyl diphosphate synthase [EC:2.5.1.1 2.5.1.10]	ispA	13.8363	44.9556	0.307777
	peg.1312	K02523	octaprenyl-diphosphate synthase [EC:2.5.1.90]	ispB	104.66	49.1883	2.12775
	peg.2781	K00806	undecaprenyl diphosphate synthase [EC:2.5.1.31]	uppS	55.1993	53.4422	1.03288
00906 Carotenoid biosynthesis [PATH:ko00906]
	peg.1946	K02291	15-cis-phytoene synthase [EC:2.5.1.32]	crtB	28.0268	49.7595	0.563245
00981 Insect hormone biosynthesis [PATH:ko00981]
	peg.2361	K00128	aldehyde dehydrogenase (NAD+) [EC:1.2.1.3]	ALDH	28.144	46.5646	0.604408
00908 Zeatin biosynthesis [PATH:ko00908]
	peg.2743	K00791	tRNA dimethylallyltransferase [EC:2.5.1.75]	miaA, TRIT1	6.54441	33.9556	0.192734
00903 Limonene and pinene degradation [PATH:ko00903]
	peg.2361	K00128	aldehyde dehydrogenase (NAD+) [EC:1.2.1.3]	ALDH	28.144	46.5646	0.604408
	peg.151	K01692	enoyl-CoA hydratase [EC:4.2.1.17]	paaF, echA	31.9371	51.0539	0.625557
	peg.1881	K01692	enoyl-CoA hydratase [EC:4.2.1.17]	paaF, echA	18.6072	44.4671	0.418449
	peg.2331	K01782	3-hydroxyacyl-CoA dehydrogenase / enoyl-CoA hydratase / 3-hydroxybutyryl-CoA epimerase [EC:1.1.1.35 4.2.1.17 5.1.2.3]	fadJ	39.3137	54.2849	0.724211
00281 Geraniol degradation [PATH:ko00281]
	peg.151	K01692	enoyl-CoA hydratase [EC:4.2.1.17]	paaF, echA	31.9371	51.0539	0.625557
	peg.1881	K01692	enoyl-CoA hydratase [EC:4.2.1.17]	paaF, echA	18.6072	44.4671	0.418449
	peg.2331	K01782	3-hydroxyacyl-CoA dehydrogenase / enoyl-CoA hydratase / 3-hydroxybutyryl-CoA epimerase [EC:1.1.1.35 4.2.1.17 5.1.2.3]	fadJ	39.3137	54.2849	0.724211
01051 Biosynthesis of ansamycins [PATH:ko01051]
	peg.2253	K00615	transketolase [EC:2.2.1.1]	E2.2.1.1, tktA, tktB	43.1913	30.7296	1.40553
00523 Polyketide sugar unit biosynthesis [PATH:ko00523]
	peg.880	K01790	dTDP-4-dehydrorhamnose 3,5-epimerase [EC:5.1.3.13]	rfbC, rmlC	14.0547	62.0769	0.226408
	peg.3466	K00067	dTDP-4-dehydrorhamnose reductase [EC:1.1.1.133]	rfbD, rmlD	12.1216	62.3403	0.194443
01053 Biosynthesis of siderophore group nonribosomal peptides [PATH:ko01053]
	peg.3023	K04782	isochorismate pyruvate lyase [EC:4.2.99.21]	pchB	42.0698	51.2174	0.821396
01055 Biosynthesis of vancomycin group antibiotics [PATH:ko01055]
	peg.873	K16422	4-hydroxymandelate oxidase [EC:1.1.3.46]	hmo, nocN	19.1924	41.967	0.457321
09110 Biosynthesis of other secondary metabolites
00940 Phenylpropanoid biosynthesis [PATH:ko00940]
	peg.1496	K03186	flavin prenyltransferase [EC:2.5.1.129]	ubiX, bsdB, PAD1	90.3855	38.215	2.36518
	peg.3037	K03782	catalase-peroxidase [EC:1.11.1.21]	katG	103.286	112.361	0.919234
00950 Isoquinoline alkaloid biosynthesis [PATH:ko00950]
	peg.1861	K00812	aspartate aminotransferase [EC:2.6.1.1]	aspB	66.1646	53.3696	1.23974
00960 Tropane, piperidine and pyridine alkaloid biosynthesis [PATH:ko00960]
	peg.1861	K00812	aspartate aminotransferase [EC:2.6.1.1]	aspB	66.1646	53.3696	1.23974
	peg.590	K00817	histidinol-phosphate aminotransferase [EC:2.6.1.9]	hisC	12.7255	76.6423	0.166037
	peg.1972	K00817	histidinol-phosphate aminotransferase [EC:2.6.1.9]	hisC	44.3764	72.5472	0.61169
00966 Glucosinolate biosynthesis [PATH:ko00966]
	peg.1150	K01703	3-isopropylmalate/(R)-2-methylmalate dehydratase large subunit [EC:4.2.1.33 4.2.1.35]	leuC, IPMI-L	101.808	118.274	0.860783
00332 Carbapenem biosynthesis [PATH:ko00332]
	peg.3307	K00931	glutamate 5-kinase [EC:2.7.2.11]	proB	16.3843	46.0889	0.355493
	peg.3308	K00147	glutamate-5-semialdehyde dehydrogenase [EC:1.2.1.41]	proA	34.0564	52.4096	0.649812
00261 Monobactam biosynthesis [PATH:ko00261]
	peg.873	K16422	4-hydroxymandelate oxidase [EC:1.1.3.46]	hmo, nocN	19.1924	41.967	0.457321
	peg.2661	K00955	bifunctional enzyme CysN/CysC [EC:2.7.7.4 2.7.1.25]	cysNC	50.6032	41.1086	1.23096
	peg.2660	K00957	sulfate adenylyltransferase subunit 2 [EC:2.7.7.4]	cysD	50.4785	49.75	1.01464
	peg.656	K00928	aspartate kinase [EC:2.7.2.4]	lysC	33.1555	48.1431	0.688685
	peg.406	K00133	aspartate-semialdehyde dehydrogenase [EC:1.2.1.11]	asd	63.6288	82.137	0.774666
	peg.3159	K01714	4-hydroxy-tetrahydrodipicolinate synthase [EC:4.3.3.7]	dapA	133.742	84.3227	1.58608
	peg.402	K00215	4-hydroxy-tetrahydrodipicolinate reductase [EC:1.17.1.8]	dapB	128.141	94.3722	1.35783
00521 Streptomycin biosynthesis [PATH:ko00521]
	peg.2424	K15778	phosphomannomutase / phosphoglucomutase [EC:5.4.2.8 5.4.2.2]	pmm-pgm	23.1351	52.248	0.442794
	peg.1681	K01092	myo-inositol-1(or 4)-monophosphatase [EC:3.1.3.25]	E3.1.3.25, IMPA, suhB	17.5853	29.5136	0.595838
	peg.3119	K01092	myo-inositol-1(or 4)-monophosphatase [EC:3.1.3.25]	E3.1.3.25, IMPA, suhB	60.3377	53.643	1.1248
	peg.880	K01790	dTDP-4-dehydrorhamnose 3,5-epimerase [EC:5.1.3.13]	rfbC, rmlC	14.0547	62.0769	0.226408
	peg.3466	K00067	dTDP-4-dehydrorhamnose reductase [EC:1.1.1.133]	rfbD, rmlD	12.1216	62.3403	0.194443
00401 Novobiocin biosynthesis [PATH:ko00401]
	peg.589	K00220	cyclohexadieny/prephenate dehydrogenase [EC:1.3.1.43 1.3.1.12]	tyrC	17.2952	54.0543	0.319959
	peg.1861	K00812	aspartate aminotransferase [EC:2.6.1.1]	aspB	66.1646	53.3696	1.23974
	peg.590	K00817	histidinol-phosphate aminotransferase [EC:2.6.1.9]	hisC	12.7255	76.6423	0.166037
	peg.1972	K00817	histidinol-phosphate aminotransferase [EC:2.6.1.9]	hisC	44.3764	72.5472	0.61169
00405 Phenazine biosynthesis [PATH:ko00405]
	peg.2724	K06998	trans-2,3-dihydro-3-hydroxyanthranilate isomerase [EC:5.3.3.17]	phzF	14.0553	30.02	0.468198
	peg.1678	K01657	anthranilate synthase component I [EC:4.1.3.27]	trpE	25.0831	34.0572	0.736499
	peg.2258	K01658	anthranilate synthase component II [EC:4.1.3.27]	trpG	48.0625	72.2733	0.66501
00333 Prodigiosin biosynthesis [PATH:ko00333]
	peg.2288	K00645	[acyl-carrier-protein] S-malonyltransferase [EC:2.3.1.39]	fabD	40.2741	39.283	1.02523
	peg.1069	K00059	3-oxoacyl-[acyl-carrier protein] reductase [EC:1.1.1.100]	fabG	16.6456	30.187	0.551416
	peg.1480	K00059	3-oxoacyl-[acyl-carrier protein] reductase [EC:1.1.1.100]	fabG	202.308	74.3269	2.72187
	peg.2287	K00059	3-oxoacyl-[acyl-carrier protein] reductase [EC:1.1.1.100]	fabG	74.3287	51.1081	1.45434
	peg.2733	K00059	3-oxoacyl-[acyl-carrier protein] reductase [EC:1.1.1.100]	fabG	59.8854	80.0887	0.747739
	peg.184	K00208	enoyl-[acyl-carrier protein] reductase I [EC:1.3.1.9 1.3.1.10]	fabI	101.579	84.6168	1.20045
	peg.1659	K00208	enoyl-[acyl-carrier protein] reductase I [EC:1.3.1.9 1.3.1.10]	fabI	92.1437	62.9747	1.46319
00999 Biosynthesis of secondary metabolites - unclassified [PATH:ko00999]
	peg.1482	K02078	acyl carrier protein	acpP	601.391	320.904	1.87405
	peg.2286	K02078	acyl carrier protein	acpP	626.959	258.323	2.42704
	peg.2328	K02078	acyl carrier protein	acpP	1141.99	538.727	2.11979
09111 Xenobiotics biodegradation and metabolism
00362 Benzoate degradation [PATH:ko00362]
	peg.335	K07104	catechol 2,3-dioxygenase [EC:1.13.11.2]	catE	64.2527	81.8379	0.785122
	peg.2331	K01782	3-hydroxyacyl-CoA dehydrogenase / enoyl-CoA hydratase / 3-hydroxybutyryl-CoA epimerase [EC:1.1.1.35 4.2.1.17 5.1.2.3]	fadJ	39.3137	54.2849	0.724211
	peg.151	K01692	enoyl-CoA hydratase [EC:4.2.1.17]	paaF, echA	31.9371	51.0539	0.625557
	peg.1881	K01692	enoyl-CoA hydratase [EC:4.2.1.17]	paaF, echA	18.6072	44.4671	0.418449
	peg.500	K00074	3-hydroxybutyryl-CoA dehydrogenase [EC:1.1.1.157]	paaH, hbd, fadB, mmgB	211.161	104.269	2.02516
	peg.603	K00626	acetyl-CoA C-acetyltransferase [EC:2.3.1.9]	E2.3.1.9, atoB	415.623	151.813	2.73773
	peg.930	K00626	acetyl-CoA C-acetyltransferase [EC:2.3.1.9]	E2.3.1.9, atoB	3.51126	43.0016	0.0816542
	peg.2330	K00626	acetyl-CoA C-acetyltransferase [EC:2.3.1.9]	E2.3.1.9, atoB	31.9987	43.0847	0.742694
00627 Aminobenzoate degradation [PATH:ko00627]
	peg.1759	K01512	acylphosphatase [EC:3.6.1.7]	acyP	37.1326	57.4917	0.645878
	peg.1496	K03186	flavin prenyltransferase [EC:2.5.1.129]	ubiX, bsdB, PAD1	90.3855	38.215	2.36518
	peg.151	K01692	enoyl-CoA hydratase [EC:4.2.1.17]	paaF, echA	31.9371	51.0539	0.625557
	peg.1881	K01692	enoyl-CoA hydratase [EC:4.2.1.17]	paaF, echA	18.6072	44.4671	0.418449
00625 Chloroalkane and chloroalkene degradation [PATH:ko00625]
	peg.2361	K00128	aldehyde dehydrogenase (NAD+) [EC:1.2.1.3]	ALDH	28.144	46.5646	0.604408
	peg.2957	K14028	methanol dehydrogenase (cytochrome c) subunit 1 [EC:1.1.2.7]	mdh1, mxaF	8788.35	4744.23	1.85243
	peg.2954	K14029	methanol dehydrogenase (cytochrome c) subunit 2 [EC:1.1.2.7]	mdh2, mxaI	10910.6	4657.37	2.34264
	peg.2565	K00114	alcohol dehydrogenase (cytochrome c) [EC:1.1.2.8]	exaA	43.467	190.045	0.228719
	peg.1275	K01561	haloacetate dehalogenase [EC:3.8.1.3]	dehH	11.2646	36.3419	0.309962
00361 Chlorocyclohexane and chlorobenzene degradation [PATH:ko00361]
	peg.335	K07104	catechol 2,3-dioxygenase [EC:1.13.11.2]	catE	64.2527	81.8379	0.785122
	peg.1275	K01561	haloacetate dehalogenase [EC:3.8.1.3]	dehH	11.2646	36.3419	0.309962
00622 Xylene degradation [PATH:ko00622]
	peg.335	K07104	catechol 2,3-dioxygenase [EC:1.13.11.2]	catE	64.2527	81.8379	0.785122
00633 Nitrotoluene degradation [PATH:ko00633]
	peg.1734	K10680	N-ethylmaleimide reductase [EC:1.-.-.-]	nemA	55.7641	124.445	0.448102
00643 Styrene degradation [PATH:ko00643]
	peg.335	K07104	catechol 2,3-dioxygenase [EC:1.13.11.2]	catE	64.2527	81.8379	0.785122
	peg.2158	K01026	propionate CoA-transferase [EC:2.8.3.1]	pct	135.112	36.9006	3.66151
00791 Atrazine degradation [PATH:ko00791]
	peg.2197	K19837	biuret amidohydrolase [EC:3.5.1.84]	atzE	14.2956	22.7237	0.629105
00930 Caprolactam degradation [PATH:ko00930]
	peg.151	K01692	enoyl-CoA hydratase [EC:4.2.1.17]	paaF, echA	31.9371	51.0539	0.625557
	peg.1881	K01692	enoyl-CoA hydratase [EC:4.2.1.17]	paaF, echA	18.6072	44.4671	0.418449
	peg.2331	K01782	3-hydroxyacyl-CoA dehydrogenase / enoyl-CoA hydratase / 3-hydroxybutyryl-CoA epimerase [EC:1.1.1.35 4.2.1.17 5.1.2.3]	fadJ	39.3137	54.2849	0.724211
00621 Dioxin degradation [PATH:ko00621]
	peg.3346	K00480	salicylate hydroxylase [EC:1.14.13.1]	E1.14.13.1	60.4286	36.7707	1.64339
00626 Naphthalene degradation [PATH:ko00626]
	peg.3346	K00480	salicylate hydroxylase [EC:1.14.13.1]	E1.14.13.1	60.4286	36.7707	1.64339
00624 Polycyclic aromatic hydrocarbon degradation [PATH:ko00624]
	peg.3346	K00480	salicylate hydroxylase [EC:1.14.13.1]	E1.14.13.1	60.4286	36.7707	1.64339
00984 Steroid degradation [PATH:ko00984]
	peg.139	K03333	cholesterol oxidase [EC:1.1.3.6]	choD	8.29793	31.3322	0.264837
00980 Metabolism of xenobiotics by cytochrome P450 [PATH:ko00980]
	peg.630	K00799	glutathione S-transferase [EC:2.5.1.18]	GST, gst	40.2607	58.9037	0.683501
	peg.1082	K00799	glutathione S-transferase [EC:2.5.1.18]	GST, gst	55.8415	79.49	0.702497
	peg.1794	K00799	glutathione S-transferase [EC:2.5.1.18]	GST, gst	22.5185	93.8506	0.23994
	peg.3276	K00799	glutathione S-transferase [EC:2.5.1.18]	GST, gst	20.739	50.2493	0.412722
00982 Drug metabolism - cytochrome P450 [PATH:ko00982]
	peg.630	K00799	glutathione S-transferase [EC:2.5.1.18]	GST, gst	40.2607	58.9037	0.683501
	peg.1082	K00799	glutathione S-transferase [EC:2.5.1.18]	GST, gst	55.8415	79.49	0.702497
	peg.1794	K00799	glutathione S-transferase [EC:2.5.1.18]	GST, gst	22.5185	93.8506	0.23994
	peg.3276	K00799	glutathione S-transferase [EC:2.5.1.18]	GST, gst	20.739	50.2493	0.412722
00983 Drug metabolism - other enzymes [PATH:ko00983]
	peg.578	K00760	hypoxanthine phosphoribosyltransferase [EC:2.4.2.8]	hprT, hpt, HPRT1	78.3995	68.8321	1.139
	peg.1031	K00088	IMP dehydrogenase [EC:1.1.1.205]	IMPDH, guaB	68.3877	60.9534	1.12197
	peg.1036	K01951	GMP synthase (glutamine-hydrolysing) [EC:6.3.5.2]	guaA, GMPS	28.8547	45.0362	0.6407
	peg.1098	K00569	thiopurine S-methyltransferase [EC:2.1.1.67]	TPMT, tpmT	20.3386	49.0553	0.414606
	peg.1323	K00940	nucleoside-diphosphate kinase [EC:2.7.4.6]	ndk, NME	136.864	66.5828	2.05555
	peg.650	K01520	dUTP pyrophosphatase [EC:3.6.1.23]	dut, DUT	12.6429	61.5805	0.205308
	peg.3037	K03782	catalase-peroxidase [EC:1.11.1.21]	katG	103.286	112.361	0.919234
	peg.630	K00799	glutathione S-transferase [EC:2.5.1.18]	GST, gst	40.2607	58.9037	0.683501
	peg.1082	K00799	glutathione S-transferase [EC:2.5.1.18]	GST, gst	55.8415	79.49	0.702497
	peg.1794	K00799	glutathione S-transferase [EC:2.5.1.18]	GST, gst	22.5185	93.8506	0.23994
	peg.3276	K00799	glutathione S-transferase [EC:2.5.1.18]	GST, gst	20.739	50.2493	0.412722
09120 Genetic Information Processing
09121 Transcription
03020 RNA polymerase [PATH:ko03020]
09122 Translation
03010 Ribosome [PATH:ko03010]
00970 Aminoacyl-tRNA biosynthesis [PATH:ko00970]
03008 Ribosome biogenesis in eukaryotes [PATH:ko03008]
09123 Folding, sorting and degradation
03060 Protein export [PATH:ko03060]
04122 Sulfur relay system [PATH:ko04122]
03018 RNA degradation [PATH:ko03018]
09124 Replication and repair
03030 DNA replication [PATH:ko03030]
03410 Base excision repair [PATH:ko03410]
03420 Nucleotide excision repair [PATH:ko03420]
03430 Mismatch repair [PATH:ko03430]
03440 Homologous recombination [PATH:ko03440]
03450 Non-homologous end-joining [PATH:ko03450]
	peg.2873	K02950	small subunit ribosomal protein S12	RP-S12, MRPS12, rpsL	279.338	51.2745	5.44789
	peg.1936	K03117	sec-independent protein translocase protein TatB	tatB	521.194	105.134	4.95744
	peg.2846	K02952	small subunit ribosomal protein S13	RP-S13, rpsM	498.363	105.91	4.70554
	peg.2162	K02970	small subunit ribosomal protein S21	RP-S21, MRPS21, rpsU	304.769	65.7915	4.63235
	peg.683	K02887	large subunit ribosomal protein L20	RP-L20, MRPL20, rplT	258.104	59.7645	4.31869
	peg.1949	K02909	large subunit ribosomal protein L31	RP-L31, rpmE	601.462	144.437	4.16418
	peg.607	K02911	large subunit ribosomal protein L32	RP-L32, MRPL32, rpmF	474.33	115.716	4.0991
	peg.2211	K01689	enolase [EC:4.2.1.11]	ENO, eno	150.806	38.4777	3.91931
	peg.2058	K02913	large subunit ribosomal protein L33	RP-L33, MRPL33, rpmG	496.587	132.782	3.73987
	peg.682	K02916	large subunit ribosomal protein L35	RP-L35, MRPL35, rpmI	557.537	150.865	3.6956
	peg.1937	K03118	sec-independent protein translocase protein TatC	tatC	140.205	39.4048	3.55806
	peg.2891	K03073	preprotein translocase subunit SecE	secE	527.512	148.3	3.55707
	peg.376	K03071	preprotein translocase subunit SecB	secB	314.642	91.0618	3.45526
	peg.2872	K02992	small subunit ribosomal protein S7	RP-S7, MRPS7, rpsG	360.668	110.888	3.25254
	peg.181	K02968	small subunit ribosomal protein S20	RP-S20, rpsT	439.221	138.215	3.17782
	peg.3223	K02899	large subunit ribosomal protein L27	RP-L27, MRPL27, rpmA	333.818	105.821	3.15457
	peg.2291	K02990	small subunit ribosomal protein S6	RP-S6, MRPS6, rpsF	174.056	56.6124	3.07452
	peg.3035	K04077	chaperonin GroEL	groEL, HSPD1	169.472	55.2249	3.06876
	peg.2843	K02879	large subunit ribosomal protein L17	RP-L17, MRPL17, rplQ	406.646	132.746	3.06334
	peg.3521	K02897	large subunit ribosomal protein L25	RP-L25, rplY	236.444	80.7608	2.92771
	peg.1935	K03116	sec-independent protein translocase protein TatA	tatA	795.753	273.98	2.90442
	peg.2368	K02986	small subunit ribosomal protein S4	RP-S4, rpsD	220.823	77.4064	2.85277
	peg.3049	K04077	chaperonin GroEL	groEL, HSPD1	516.422	181.336	2.84787
	peg.1544	K02956	small subunit ribosomal protein S15	RP-S15, MRPS15, rpsO	482.63	171.607	2.81242
	peg.3152	K03060	DNA-directed RNA polymerase subunit omega [EC:2.7.7.6]	rpoZ	352.551	127.39	2.7675
	peg.1142	K02884	large subunit ribosomal protein L19	RP-L19, MRPL19, rplS	161.531	59.0401	2.73595
	peg.3222	K02888	large subunit ribosomal protein L21	RP-L21, MRPL21, rplU	393.901	148.049	2.66061
	peg.2886	K02935	large subunit ribosomal protein L7/L12	RP-L7, MRPL12, rplL	715.788	284.651	2.51461
	peg.2844	K03040	DNA-directed RNA polymerase subunit alpha [EC:2.7.7.6]	rpoA	257.838	104.022	2.47869
	peg.2887	K02864	large subunit ribosomal protein L10	RP-L10, MRPL10, rplJ	858.763	361.418	2.37609
	peg.3502	K02945	small subunit ribosomal protein S1	RP-S1, rpsA	176.366	74.2949	2.37386
	peg.3116	K02919	large subunit ribosomal protein L36	RP-L36, MRPL36, rpmJ	356.492	150.403	2.37024
	peg.2845	K02948	small subunit ribosomal protein S11	RP-S11, MRPS11, rpsK	418.785	189.847	2.20591
	peg.336	K02902	large subunit ribosomal protein L28	RP-L28, MRPL28, rpmB	435.465	198.372	2.19519
	peg.2889	K02867	large subunit ribosomal protein L11	RP-L11, MRPL11, rplK	317.085	145.243	2.18314
	peg.1942	K03210	preprotein translocase subunit YajC	yajC	138.218	63.4143	2.1796
	peg.2888	K02863	large subunit ribosomal protein L1	RP-L1, MRPL1, rplA	220.39	104.243	2.11419
	peg.2994	K02871	large subunit ribosomal protein L13	RP-L13, MRPL13, rplM	351.151	166.88	2.10422
	peg.2230	K03666	host factor-I protein	hfq	586.203	285.92	2.05024
	peg.178	K02338	DNA polymerase III subunit beta [EC:2.7.7.7]	dnaN	140.98	69.6438	2.0243
	peg.2995	K02996	small subunit ribosomal protein S9	RP-S9, MRPS9, rpsI	257.517	129.603	1.98697
	peg.2850	K02907	large subunit ribosomal protein L30	RP-L30, MRPL30, rpmD	535.145	271.703	1.9696
	peg.2776	K02967	small subunit ribosomal protein S2	RP-S2, MRPS2, rpsB	186.251	99.5828	1.87032
	peg.1674	K03075	preprotein translocase subunit SecG	secG	96.6206	52.6408	1.83547
	peg.417	K02959	small subunit ribosomal protein S16	RP-S16, MRPS16, rpsP	173.03	94.4594	1.83179
	peg.1302	K03470	ribonuclease HII [EC:3.1.26.4]	rnhB	54.4894	31.4439	1.73291
	peg.2294	K02939	large subunit ribosomal protein L9	RP-L9, MRPL9, rplI	146.206	86.7192	1.68597
	peg.2866	K02892	large subunit ribosomal protein L23	RP-L23, MRPL23, rplW	528.514	318.525	1.65925
	peg.1316	K01878	glycyl-tRNA synthetase alpha chain [EC:6.1.1.14]	glyQ	66.4298	40.4827	1.64094
	peg.2869	K02946	small subunit ribosomal protein S10	RP-S10, MRPS10, rpsJ	459.681	281.197	1.63473
	peg.1831	K00566	tRNA-uridine 2-sulfurtransferase [EC:2.8.1.13]	mnmA, trmU	111.618	69.3951	1.60845
	peg.2848	K03076	preprotein translocase subunit SecY	secY	115.021	72.6959	1.58222
	peg.2854	K02994	small subunit ribosomal protein S8	RP-S8, rpsH	322.426	205.586	1.56833
	peg.1545	K00962	polyribonucleotide nucleotidyltransferase [EC:2.7.7.8]	pnp, PNPT1	135.724	86.6361	1.5666
	peg.377	K02342	DNA polymerase III subunit epsilon [EC:2.7.7.7]	dnaQ	69.8203	45.3239	1.54047
	peg.2034	K01011	thiosulfate/3-mercaptopyruvate sulfurtransferase [EC:2.8.1.1 2.8.1.2]	TST, MPST, sseA	129.062	87.7351	1.47104
	peg.2849	K02876	large subunit ribosomal protein L15	RP-L15, MRPL15, rplO	265.056	180.902	1.46519
	peg.2136	K02316	DNA primase [EC:2.7.7.-]	dnaG	115.655	79.7105	1.45094
	peg.2868	K02906	large subunit ribosomal protein L3	RP-L3, MRPL3, rplC	323.48	229.896	1.40707
	peg.2862	K02982	small subunit ribosomal protein S3	RP-S3, rpsC	243.214	175.961	1.3822
	peg.2851	K02988	small subunit ribosomal protein S5	RP-S5, MRPS5, rpsE	205.522	150.252	1.36785
	peg.384	K03628	transcription termination factor Rho	rho	101.898	75.6245	1.34742
	peg.2852	K02881	large subunit ribosomal protein L18	RP-L18, MRPL18, rplR	268.422	201.889	1.32956
	peg.549	K02914	large subunit ribosomal protein L34	RP-L34, MRPL34, rpmH	73.9177	55.9011	1.32229
	peg.2855	K02954	small subunit ribosomal protein S14	RP-S14, MRPS14, rpsN	462.172	350.585	1.31829
	peg.789	K04043	molecular chaperone DnaK	dnaK, HSPA9	432.411	330.957	1.30655
	peg.2864	K02965	small subunit ribosomal protein S19	RP-S19, rpsS	662.686	511.03	1.29677
	peg.2867	K02926	large subunit ribosomal protein L4	RP-L4, MRPL4, rplD	264.815	204.742	1.29341
	peg.1095	K03070	preprotein translocase subunit SecA	secA	106.082	82.4195	1.28709
	peg.2853	K02933	large subunit ribosomal protein L6	RP-L6, MRPL6, rplF	406.6	317.545	1.28045
	peg.1055	K08300	ribonuclease E [EC:3.1.26.12]	rne	98.8056	77.6441	1.27255
	peg.2856	K02931	large subunit ribosomal protein L5	RP-L5, MRPL5, rplE	297.745	244.642	1.21706
	peg.1370	K03636	sulfur-carrier protein	moaD, cysO	67.1704	55.2082	1.21667
	peg.2865	K02886	large subunit ribosomal protein L2	RP-L2, MRPL2, rplB	308.647	254.622	1.21218
	peg.2885	K03043	DNA-directed RNA polymerase subunit beta [EC:2.7.7.6]	rpoB	133.572	112.098	1.19157
	peg.1944	K03074	preprotein translocase subunit SecF	secF	95.4348	81.7834	1.16692
	peg.571	K03639	GTP 3',8-cyclase [EC:4.1.99.22]	moaA, CNX2	87.9902	75.9118	1.15911
	peg.2863	K02890	large subunit ribosomal protein L22	RP-L22, MRPL22, rplV	400.147	348.471	1.14829
	peg.2759	K04085	tRNA 2-thiouridine synthesizing protein A [EC:2.8.1.-]	tusA, sirA	95.885	83.9689	1.14191
	peg.1938	K01875	seryl-tRNA synthetase [EC:6.1.1.11]	SARS, serS	59.5662	52.5018	1.13456
	peg.2261	K03637	cyclic pyranopterin monophosphate synthase [EC:4.6.1.17]	moaC, CNX3	46.8465	41.3008	1.13428
	peg.1943	K03072	preprotein translocase subunit SecD	secD	86.493	76.4626	1.13118
	peg.552	K03217	YidC/Oxa1 family membrane protein insertase	yidC, spoIIIJ, OXA1, ccfA	48.3901	42.8721	1.12871
	peg.2859	K02961	small subunit ribosomal protein S17	RP-S17, MRPS17, rpsQ	430.652	384.851	1.11901
	peg.2861	K02878	large subunit ribosomal protein L16	RP-L16, MRPL16, rplP	245.113	219.694	1.1157
	peg.432	K01869	leucyl-tRNA synthetase [EC:6.1.1.4]	LARS, leuS	67.8891	61.7431	1.09954
	peg.3026	K02435	aspartyl-tRNA(Asn)/glutamyl-tRNA(Gln) amidotransferase subunit C [EC:6.3.5.6 6.3.5.7]	gatC, GATC	93.8114	86.5579	1.0838
	peg.3253	K02343	DNA polymerase III subunit gamma/tau [EC:2.7.7.7]	dnaX	49.3028	45.9934	1.07195
	peg.2884	K03046	DNA-directed RNA polymerase subunit beta' [EC:2.7.7.6]	rpoC	147.143	137.391	1.07098
	peg.2295	K02314	replicative DNA helicase [EC:3.6.4.12]	dnaB	46.8059	44.8481	1.04365
	peg.2860	K02904	large subunit ribosomal protein L29	RP-L29, rpmC	353.188	342.177	1.03218
	peg.3148	K03100	signal peptidase I [EC:3.4.21.89]	lepB	74.6975	72.7881	1.02623
	peg.2857	K02895	large subunit ribosomal protein L24	RP-L24, MRPL24, rplX	360.868	357.615	1.0091
	peg.684	K01889	phenylalanyl-tRNA synthetase alpha chain [EC:6.1.1.20]	FARSA, pheS	38.9901	41.0199	0.950515
	peg.1927	K01887	arginyl-tRNA synthetase [EC:6.1.1.19]	RARS, argS	48.1772	50.7147	0.949965
	peg.1783	K07462	single-stranded-DNA-specific exonuclease [EC:3.1.-.-]	recJ	33.0173	34.8174	0.948299
	peg.2858	K02874	large subunit ribosomal protein L14	RP-L14, MRPL14, rplN	292.62	316.818	0.923621
	peg.416	K03106	signal recognition particle subunit SRP54 [EC:3.6.5.4]	SRP54, ffh	39.1606	43.8314	0.893438
	peg.3181	K03657	DNA helicase II / ATP-dependent DNA helicase PcrA [EC:3.6.4.12]	uvrD, pcrA	40.8505	46.5104	0.87831
	peg.3021	K02434	aspartyl-tRNA(Asn)/glutamyl-tRNA(Gln) amidotransferase subunit B [EC:6.3.5.6 6.3.5.7]	gatB, PET112	50.8412	61.2191	0.83048
	peg.345	K22468	polyphosphate kinase [EC:2.7.4.1]	ppk2	49.1658	59.9113	0.820642
	peg.2187	K03154	sulfur carrier protein	thiS	54.2987	68.32	0.794769
	peg.3235	K01881	prolyl-tRNA synthetase [EC:6.1.1.15]	PARS, proS	61.089	80.6908	0.757075
	peg.1664	K11927	ATP-dependent RNA helicase RhlE [EC:3.6.4.13]	rhlE	42.243	57.0457	0.740511
	peg.1814	K03636	sulfur-carrier protein	moaD, cysO	26.9462	37.5589	0.717438
	peg.3230	K02337	DNA polymerase III subunit alpha [EC:2.7.7.7]	dnaE	31.8648	45.021	0.707776
	peg.3154	K21929	uracil-DNA glycosylase [EC:3.2.2.27]	udg	35.2635	52.4142	0.672785
	peg.2405	K03553	recombination protein RecA	recA	143.898	216.905	0.663413
	peg.1136	K03575	A/G-specific adenine glycosylase [EC:3.2.2.31]	mutY	36.6566	55.5537	0.65984
	peg.2481	K01868	threonyl-tRNA synthetase [EC:6.1.1.3]	TARS, thrS	24.3652	37.0163	0.658231
	peg.2404	K01872	alanyl-tRNA synthetase [EC:6.1.1.7]	AARS, alaS	24.9062	37.9737	0.655879
	peg.1919	K01873	valyl-tRNA synthetase [EC:6.1.1.9]	VARS, valS	23.2895	36.3656	0.640427
	peg.36	K04566	lysyl-tRNA synthetase, class I [EC:6.1.1.6]	lysK	24.3095	39.0768	0.622095
	peg.3147	K03685	ribonuclease III [EC:3.1.26.3]	rnc, DROSHA, RNT1	23.6027	38.5059	0.612963
	peg.1854	K03702	excinuclease ABC subunit B	uvrB	28.8972	47.2681	0.611347
	peg.477	K04066	primosomal protein N' (replication factor Y) (superfamily II helicase) [EC:3.6.4.-]	priA	49.9443	82.0094	0.609007
	peg.685	K01890	phenylalanyl-tRNA synthetase beta chain [EC:6.1.1.20]	FARSB, pheT	26.9893	44.4032	0.607823
	peg.2016	K03111	single-strand DNA-binding protein	ssb	35.7635	59.8915	0.597137
	peg.1522	K01867	tryptophanyl-tRNA synthetase [EC:6.1.1.2]	WARS, trpS	26.1641	43.8902	0.596126
	peg.3387	K03602	exodeoxyribonuclease VII small subunit [EC:3.1.11.6]	xseB	75.3788	130.494	0.577643
	peg.1753	K01883	cysteinyl-tRNA synthetase [EC:6.1.1.16]	CARS, cysS	27.3085	48.387	0.564377
	peg.1695	K01159	crossover junction endodeoxyribonuclease RuvC [EC:3.1.22.4]	ruvC	17.3949	31.2995	0.555756
	peg.3024	K02433	aspartyl-tRNA(Asn)/glutamyl-tRNA(Gln) amidotransferase subunit A [EC:6.3.5.6 6.3.5.7]	gatA, QRSL1	31.256	56.2798	0.555368
	peg.1699	K03551	holliday junction DNA helicase RuvB [EC:3.6.4.12]	ruvB	21.936	39.8646	0.550263
	peg.1173	K06187	recombination protein RecR	recR	29.7245	55.0165	0.540283
	peg.2304	K02341	DNA polymerase III subunit delta' [EC:2.7.7.7]	holB	16.4993	30.5532	0.540021
	peg.492	K08311	putative (di)nucleoside polyphosphate hydrolase [EC:3.6.1.-]	nudH	29.2351	54.2642	0.538755
	peg.1338	K01876	aspartyl-tRNA synthetase [EC:6.1.1.12]	aspS	21.3063	39.8704	0.534389
	peg.1371	K03635	molybdopterin synthase catalytic subunit [EC:2.8.1.12]	MOCS2B, moaE	57.0214	107.917	0.52838
	peg.2397	K03654	ATP-dependent DNA helicase RecQ [EC:3.6.4.12]	recQ	20.9709	40.0208	0.523998
	peg.491	K08311	putative (di)nucleoside polyphosphate hydrolase [EC:3.6.1.-]	nudH	58.4925	113.346	0.516055
	peg.3278	K03101	signal peptidase II [EC:3.4.23.36]	lspA	39.4011	76.7021	0.51369
	peg.2829	K03831	molybdopterin adenylyltransferase [EC:2.7.7.75]	mogA	34.3377	68.7353	0.499564
	peg.1306	K21929	uracil-DNA glycosylase [EC:3.2.2.27]	udg	25.4252	51.3492	0.495144
	peg.191	K21029	molybdopterin-synthase adenylyltransferase [EC:2.7.7.80]	moeB	31.8745	65.9244	0.483501
	peg.2180	K03601	exodeoxyribonuclease VII large subunit [EC:3.1.11.6]	xseA	24.0793	50.669	0.475228
	peg.2303	K01874	methionyl-tRNA synthetase [EC:6.1.1.10]	MARS, metG	21.6459	45.9383	0.471196
	peg.3239	K12574	ribonuclease J [EC:3.1.-.-]	rnj	21.644	46.1093	0.469407
	peg.1791	K05592	ATP-dependent RNA helicase DeaD [EC:3.6.4.13]	deaD, cshA	15.2486	32.6445	0.467112
	peg.324	K03555	DNA mismatch repair protein MutS	mutS	15.5573	34.5855	0.449822
	peg.2269	K01885	glutamyl-tRNA synthetase [EC:6.1.1.17]	EARS, gltX	18.9519	42.2064	0.449029
	peg.3091	K01866	tyrosyl-tRNA synthetase [EC:6.1.1.1]	YARS, tyrS	20.3473	45.7515	0.444734
	peg.1332	K00937	polyphosphate kinase [EC:2.7.4.1]	ppk	28.1069	63.2866	0.444121
	peg.3047	K00970	poly(A) polymerase [EC:2.7.7.19]	pcnB	11.049	25.226	0.438001
	peg.1755	K01885	glutamyl-tRNA synthetase [EC:6.1.1.17]	EARS, gltX	21.728	49.7891	0.436402
	peg.3277	K01870	isoleucyl-tRNA synthetase [EC:6.1.1.5]	IARS, ileS	17.536	40.4166	0.433882
	peg.1318	K01879	glycyl-tRNA synthetase beta chain [EC:6.1.1.14]	glyS	20.8526	48.3225	0.43153
	peg.2007	K03701	excinuclease ABC subunit A	uvrA	26.3156	61.5061	0.427853
	peg.3144	K03584	DNA repair protein RecO (recombination protein O)	recO	11.032	26.2858	0.419693
	peg.410	K03110	fused signal recognition particle receptor	ftsY	20.9384	50.1282	0.417697
	peg.1122	K03469	ribonuclease HI [EC:3.1.26.4]	rnhA, RNASEH1	21.5636	53.3545	0.404157
	peg.1348	K01246	DNA-3-methyladenine glycosylase I [EC:3.2.2.20]	tag	17.3758	45.019	0.385965
	peg.3321	K01972	DNA ligase (NAD+) [EC:6.5.1.2]	E6.5.1.2, ligA, ligB	14.5342	37.8963	0.383524
	peg.177	K03629	DNA replication and repair protein RecF	recF	9.64544	25.1603	0.383359
	peg.326	K02335	DNA polymerase I [EC:2.7.7.7]	polA	17.5754	45.9614	0.382395
	peg.158	K10773	endonuclease III [EC:4.2.99.18]	NTH	23.1915	64.0027	0.362351
	peg.560	K02339	DNA polymerase III subunit chi [EC:2.7.7.7]	holC	12.5469	34.892	0.359593
	peg.1168	K00604	methionyl-tRNA formyltransferase [EC:2.1.2.9]	MTFMT, fmt	12.3376	35.9235	0.34344
	peg.1367	K03703	excinuclease ABC subunit C	uvrC	16.2333	49.1213	0.330473
	peg.2061	K12573	ribonuclease R [EC:3.1.-.-]	rnr, vacB	14.9329	45.9376	0.32507
	peg.434	K02340	DNA polymerase III subunit delta [EC:2.7.7.7]	holA	17.4864	55.2456	0.316521
	peg.3097	K04487	cysteine desulfurase [EC:2.8.1.7]	iscS, NFS1	13.5579	44.0048	0.308101
	peg.1924	K01142	exodeoxyribonuclease III [EC:3.1.11.2]	E3.1.11.2, xthA	10.9786	39.2974	0.279371
	peg.1289	K03572	DNA mismatch repair protein MutL	mutL	8.40665	30.1035	0.279258
	peg.2086	K03723	transcription-repair coupling factor (superfamily II helicase) [EC:3.6.4.-]	mfd	9.21382	33.6278	0.273994
	peg.150	K10563	formamidopyrimidine-DNA glycosylase [EC:3.2.2.23 4.2.99.18]	mutM, fpg	10.1379	39.3911	0.257364
	peg.215	K01892	histidyl-tRNA synthetase [EC:6.1.1.21]	HARS, hisS	13.4343	59.5693	0.225524
	peg.886	K22468	polyphosphate kinase [EC:2.7.4.1]	ppk2	24.3063	123.613	0.196632
	peg.2084	K03655	ATP-dependent DNA helicase RecG [EC:3.6.4.12]	recG	8.16857	45.2909	0.180358
	peg.2347	K03076	preprotein translocase subunit SecY	secY	12.8347	74.7662	0.171665
	peg.2151	K21929	uracil-DNA glycosylase [EC:3.2.2.27]	udg	6.23598	37.5967	0.165865
	peg.776	K01247	DNA-3-methyladenine glycosylase II [EC:3.2.2.21]	alkA	7.10652	55.4147	0.128243
	peg.528	K03116	sec-independent protein translocase protein TatA	tatA	11.8001	102.991	0.114574
	peg.2166	K10747	DNA ligase 1 [EC:6.5.1.1 6.5.1.6 6.5.1.7]	LIG1	4.53706	39.8739	0.113785
	peg.1385	K01971	bifunctional non-homologous end joining protein LigD [EC:6.5.1.1]	ligD	6.83383	61.1334	0.111786
	peg.1387	K10979	DNA end-binding protein Ku	ku	8.7435	87.3118	0.100141
	peg.1386	K01971	bifunctional non-homologous end joining protein LigD [EC:6.5.1.1]	ligD	2.44805	49.2105	0.0497466
09130 Environmental Information Processing
09131 Membrane transport
02010 ABC transporters [PATH:ko02010]
02060 Phosphotransferase system (PTS) [PATH:ko02060]
03070 Bacterial secretion system [PATH:ko03070]
09132 Signal transduction
02020 Two-component system [PATH:ko02020]
	peg.1976	K01915	glutamine synthetase [EC:6.3.1.2]	glnA, GLUL	1385.18	74.9914	18.4712
	peg.1977	K04751	nitrogen regulatory protein P-II 1	glnB	1744.42	123.362	14.1407
	peg.2671	K08738	cytochrome c	CYC	3058.27	228.899	13.3608
	peg.276	K15576	nitrate/nitrite transport system substrate-binding protein	nrtA, nasF, cynA	418.42	47.285	8.84888
	peg.274	K15578	nitrate/nitrite transport system ATP-binding protein [EC:3.6.3.-]	nrtC, nasD	297.348	37.5835	7.91166
	peg.3019	K00411	ubiquinol-cytochrome c reductase iron-sulfur subunit [EC:1.10.2.2]	UQCRFS1, RIP1, petA	681.851	93.5398	7.28942
	peg.275	K15577	nitrate/nitrite transport system permease protein	nrtB, nasE, cynB	270.802	41.3563	6.54802
	peg.3018	K00412	ubiquinol-cytochrome c reductase cytochrome b subunit	CYTB, petB	499.747	81.4987	6.13196
	peg.1936	K03117	sec-independent protein translocase protein TatB	tatB	521.194	105.134	4.95744
	peg.3209	K01644	citrate lyase subunit beta / citryl-CoA lyase [EC:4.1.3.34]	citE	512.245	121.298	4.22303
	peg.1620	K19341	Cu-processing system permease protein	nosY	234.682	60.5466	3.87606
	peg.1462	K02016	iron complex transport system substrate-binding protein	ABC.FEV.S	170.146	44.2653	3.84378
	peg.1621	K19340	Cu-processing system ATP-binding protein	nosF	252.675	67.7956	3.72702
	peg.1937	K03118	sec-independent protein translocase protein TatC	tatC	140.205	39.4048	3.55806
	peg.2891	K03073	preprotein translocase subunit SecE	secE	527.512	148.3	3.55707
	peg.376	K03071	preprotein translocase subunit SecB	secB	314.642	91.0618	3.45526
	peg.1935	K03116	sec-independent protein translocase protein TatA	tatA	795.753	273.98	2.90442
	peg.603	K00626	acetyl-CoA C-acetyltransferase [EC:2.3.1.9]	E2.3.1.9, atoB	415.623	151.813	2.73773
	peg.1916	K12340	outer membrane protein	tolC	191.602	72.7599	2.63335
	peg.179	K02313	chromosomal replication initiator protein	dnaA	185.655	72.1571	2.57292
	peg.1592	K00404	cytochrome c oxidase cbb3-type subunit I [EC:1.9.3.1]	ccoN	201.328	82.7279	2.43362
	peg.1460	K02013	iron complex transport system ATP-binding protein [EC:3.6.3.34]	ABC.FEV.A	88.5335	37.6328	2.35256
	peg.1836	K13584	two-component system, cell cycle response regulator CtrA	ctrA	431.451	195.143	2.21094
	peg.1942	K03210	preprotein translocase subunit YajC	yajC	138.218	63.4143	2.1796
	peg.1593	K00405	cytochrome c oxidase cbb3-type subunit II	ccoO	260.228	121.657	2.13903
	peg.2056	K11443	two-component system, cell cycle response regulator DivK	divK	174.263	83.3125	2.09168
	peg.145	K15012	two-component system, response regulator RegA	regA, regR, actR	208.765	103.881	2.00966
	peg.1605	K02020	molybdate transport system substrate-binding protein	modA	96.2915	48.7339	1.97586
	peg.2515	K04771	serine protease Do [EC:3.4.21.107]	degP, htrA	330.069	171.287	1.927
	peg.632	K02806	PTS system, nitrogen regulatory IIA component [EC:2.7.1.-]	PTS-Ntr-EIIA, ptsN	285.723	148.277	1.92696
	peg.833	K02406	flagellin	fliC	1101.06	595.791	1.84806
	peg.1674	K03075	preprotein translocase subunit SecG	secG	96.6206	52.6408	1.83547
	peg.1441	K02016	iron complex transport system substrate-binding protein	ABC.FEV.S	69.6818	38.0384	1.83188
	peg.834	K02406	flagellin	fliC	483.311	264.472	1.82745
	peg.102	K03413	two-component system, chemotaxis family, chemotaxis protein CheY	cheY	364.409	199.472	1.82686
	peg.1072	K08738	cytochrome c	CYC	225.121	130.784	1.72132
	peg.88	K09690	lipopolysaccharide transport system permease protein	ABC-2.LPSE.P	199.639	117.182	1.70367
	peg.1461	K02015	iron complex transport system permease protein	ABC.FEV.P	75.9363	46.8528	1.62074
	peg.2848	K03076	preprotein translocase subunit SecY	secY	115.021	72.6959	1.58222
	peg.2173	K11085	ATP-binding cassette, subfamily B, bacterial MsbA [EC:3.6.3.-]	msbA	62.616	41.8345	1.49676
	peg.3169	K03413	two-component system, chemotaxis family, chemotaxis protein CheY	cheY	370.797	249.981	1.4833
	peg.846	K03408	purine-binding chemotaxis protein CheW	cheW	153.042	103.953	1.47223
	peg.844	K00575	chemotaxis protein methyltransferase CheR [EC:2.1.1.80]	cheR	100.803	68.6402	1.46856
	peg.3168	K13588	histidine phosphotransferase ChpT	chpT	72.6369	49.8562	1.45693
	peg.461	K02040	phosphate transport system substrate-binding protein	pstS	146.034	100.3	1.45598
	peg.2459	K13587	two-component system, cell cycle sensor histidine kinase and response regulator CckA [EC:2.7.13.3]	cckA	52.1532	36.1091	1.44432
	peg.3310	K03413	two-component system, chemotaxis family, chemotaxis protein CheY	cheY	105.881	73.401	1.44249
	peg.845	K03413	two-component system, chemotaxis family, chemotaxis protein CheY	cheY	206.613	145.069	1.42424
	peg.579	K09812	cell division transport system ATP-binding protein	ftsE	96.0116	70.9839	1.35258
	peg.3117	K13589	two-component system, cell cycle response regulator CpdR	cpdR	85.1591	64.6179	1.31789
	peg.1095	K03070	preprotein translocase subunit SecA	secA	106.082	82.4195	1.28709
	peg.2402	K03406	methyl-accepting chemotaxis protein	mcp	169.084	131.708	1.28378
	peg.1595	K00406	cytochrome c oxidase cbb3-type subunit III	ccoP	281.455	225.596	1.24761
	peg.1078	K13896	microcin C transport system ATP-binding protein	yejF	53.6691	44.0854	1.21739
	peg.1518	K09815	zinc transport system substrate-binding protein	znuA	77.2488	64.4961	1.19773
	peg.363	K02196	heme exporter protein D	ccmD	56.3926	47.2709	1.19297
	peg.2504	K07323	phospholipid transport system substrate-binding protein	mlaC	111.459	94.3731	1.18104
	peg.2236	K07091	lipopolysaccharide export system permease protein	lptF	56.6254	48.138	1.17631
	peg.1439	K02013	iron complex transport system ATP-binding protein [EC:3.6.3.34]	ABC.FEV.A	56.5386	48.1299	1.17471
	peg.1944	K03074	preprotein translocase subunit SecF	secF	95.4348	81.7834	1.16692
	peg.634	K06861	lipopolysaccharide export system ATP-binding protein [EC:3.6.3.-]	lptB	53.1017	46.5509	1.14072
	peg.1943	K03072	preprotein translocase subunit SecD	secD	86.493	76.4626	1.13118
	peg.552	K03217	YidC/Oxa1 family membrane protein insertase	yidC, spoIIIJ, OXA1, ccfA	48.3901	42.8721	1.12871
	peg.847	K03407	two-component system, chemotaxis family, sensor kinase CheA [EC:2.7.13.3]	cheA	130.028	115.494	1.12584
	peg.1440	K02015	iron complex transport system permease protein	ABC.FEV.P	32.398	28.9136	1.12051
	peg.616	K09817	zinc transport system ATP-binding protein [EC:3.6.3.-]	znuC	51.1968	45.8249	1.11723
	peg.2455	K02066	phospholipid/cholesterol/gamma-HCH transport system permease protein	mlaE, linK	57.5757	52.1672	1.10367
	peg.2237	K11720	lipopolysaccharide export system permease protein	lptG	73.1329	66.5021	1.09971
	peg.9	K02793	PTS system, mannose-specific IIA component [EC:2.7.1.191]	PTS-Man-EIIA, manX	65.4453	60.1205	1.08857
	peg.87	K09691	lipopolysaccharide transport system ATP-binding protein	ABC-2.LPSE.A	107.394	99.602	1.07823
	peg.945	K03620	Ni/Fe-hydrogenase 1 B-type cytochrome subunit	hyaC	100.183	94.4755	1.06041
	peg.2344	K01999	branched-chain amino acid transport system substrate-binding protein	livK	71.3435	67.3632	1.05909
	peg.2420	K07716	two-component system, cell cycle sensor histidine kinase PleC [EC:2.7.13.3]	pleC	51.5427	48.7772	1.0567
	peg.835	K02406	flagellin	fliC	238.446	226.436	1.05304
	peg.1662	K10255	acyl-lipid omega-6 desaturase (Delta-12 desaturase) [EC:1.14.19.23 1.14.19.45]	FAD6, desA	57.3395	54.9585	1.04332
	peg.3207	K07685	two-component system, NarL family, nitrate/nitrite response regulator NarP	narP	39.2793	37.8243	1.03847
	peg.2343	K01999	branched-chain amino acid transport system substrate-binding protein	livK	57.1805	57.4547	0.995228
	peg.870	K02012	iron(III) transport system substrate-binding protein	afuA, fbpA	233.333	236.34	0.987279
	peg.2057	K02488	two-component system, cell cycle response regulator [EC:2.7.7.65]	pleD	62.727	64.9655	0.965542
	peg.103	K03412	two-component system, chemotaxis family, protein-glutamate methylesterase/glutaminase [EC:3.1.1.61 3.5.1.44]	cheB	46.3791	48.4144	0.957961
	peg.2115	K11073	putrescine transport system substrate-binding protein	potF	93.4048	97.8111	0.954952
	peg.2338	K01997	branched-chain amino acid transport system permease protein	livH	54.8728	59.2077	0.926784
	peg.3475	K07659	two-component system, OmpR family, phosphate regulon response regulator OmpR	ompR	47.771	51.9502	0.919555
	peg.1140	K03406	methyl-accepting chemotaxis protein	mcp	111.291	121.561	0.915513
	peg.2340	K01995	branched-chain amino acid transport system ATP-binding protein	livG	37.2934	40.9155	0.911473
	peg.3201	K07716	two-component system, cell cycle sensor histidine kinase PleC [EC:2.7.13.3]	pleC	57.1046	63.5617	0.898412
	peg.416	K03106	signal recognition particle subunit SRP54 [EC:3.6.5.4]	SRP54, ffh	39.1606	43.8314	0.893438
	peg.2341	K01996	branched-chain amino acid transport system ATP-binding protein	livF	39.2489	44.1347	0.889297
	peg.1074	K13893	microcin C transport system substrate-binding protein	yejA	66.9135	78.0378	0.857449
	peg.3394	K14987	two-component system, LuxR family, response regulator FixJ	fixJ	69.0921	81.2344	0.850527
	peg.12	K14981	two-component system, OmpR family, response regulator ChvI	chvI	165.018	197.176	0.836907
	peg.2456	K02065	phospholipid/cholesterol/gamma-HCH transport system ATP-binding protein	mlaF, linL, mkl	34.1048	41.5481	0.82085
	peg.817	K02556	chemotaxis protein MotA	motA	72.5197	88.6981	0.817601
	peg.3195	K04771	serine protease Do [EC:3.4.21.107]	degP, htrA	55.2938	70.823	0.780732
	peg.3234	K09808	lipoprotein-releasing system permease protein	lolC_E	48.3322	62.1912	0.777154
	peg.11	K14980	two-component system, OmpR family, sensor histidine kinase ChvG [EC:2.7.13.3]	chvG	25.9318	33.7784	0.767705
	peg.364	K02195	heme exporter protein C	ccmC	46.2551	60.4406	0.765298
	peg.2339	K01998	branched-chain amino acid transport system permease protein	livM	38.0493	50.4792	0.753762
	peg.2070	K03406	methyl-accepting chemotaxis protein	mcp	40.3114	53.8573	0.748486
	peg.1077	K13895	microcin C transport system permease protein	yejE	44.591	59.8114	0.745527
	peg.2330	K00626	acetyl-CoA C-acetyltransferase [EC:2.3.1.9]	E2.3.1.9, atoB	31.9987	43.0847	0.742694
	peg.144	K15011	two-component system, sensor histidine kinase RegB [EC:2.7.13.3]	regB, regS, actS	45.3964	61.4224	0.739084
	peg.2228	K13599	two-component system, NtrC family, nitrogen regulation response regulator NtrX	ntrX	40.2898	54.7956	0.735275
	peg.3233	K09810	lipoprotein-releasing system ATP-binding protein [EC:3.6.3.-]	lolD	32.6761	45.3707	0.720202
	peg.2579	K09969	general L-amino acid transport system substrate-binding protein	aapJ, bztA	27.7041	38.6117	0.717506
	peg.1075	K13893	microcin C transport system substrate-binding protein	yejA	44.4285	62.6496	0.709159
	peg.3079	K09972	general L-amino acid transport system ATP-binding protein [EC:3.6.3.-]	aapP, bztD	33.9157	48.1099	0.704962
	peg.2457	K02067	phospholipid/cholesterol/gamma-HCH transport system substrate-binding protein	mlaD, linM	47.1069	66.9248	0.703878
	peg.2227	K13598	two-component system, NtrC family, nitrogen regulation sensor histidine kinase NtrY [EC:2.7.13.3]	ntrY	34.3044	48.8931	0.70162
	peg.580	K09811	cell division transport system permease protein	ftsX	39.8442	57.569	0.692112
	peg.2226	K07712	two-component system, NtrC family, nitrogen regulation response regulator GlnG	glnG, ntrC	28.9016	42.2998	0.683256
	peg.3081	K09969	general L-amino acid transport system substrate-binding protein	aapJ, bztA	24.6354	37.5993	0.655208
	peg.1076	K13894	microcin C transport system permease protein	yejB	40.4609	62.1438	0.651086
	peg.657	K08484	phosphotransferase system, enzyme I, PtsP [EC:2.7.3.9]	PTS-EI.PTSP, ptsP	22.7142	35.6684	0.636818
	peg.633	K03092	RNA polymerase sigma-54 factor	rpoN	31.0337	49.7536	0.623749
	peg.357	K01644	citrate lyase subunit beta / citryl-CoA lyase [EC:4.1.3.34]	citE	44.2918	71.7753	0.61709
	peg.62	K10914	CRP/FNR family transcriptional regulator, cyclic AMP receptor protein	crp	32.9597	56.0668	0.587865
	peg.2273	K01915	glutamine synthetase [EC:6.3.1.2]	glnA, GLUL	24.6766	43.3146	0.569705
	peg.2112	K01915	glutamine synthetase [EC:6.3.1.2]	glnA, GLUL	38.1	68.8007	0.553774
	peg.2097	K07675	two-component system, NarL family, sensor histidine kinase UhpB [EC:2.7.13.3]	uhpB	25.5286	48.8324	0.522781
	peg.2225	K07708	two-component system, NtrC family, nitrogen regulation sensor histidine kinase GlnL [EC:2.7.13.3]	glnL, ntrB	26.4048	50.5691	0.522153
	peg.456	K07657	two-component system, OmpR family, phosphate regulon response regulator PhoB	phoB	20.7613	42.1073	0.493057
	peg.366	K02193	heme exporter protein A [EC:3.6.3.41]	ccmA	22.2802	45.7206	0.487311
	peg.73	K02018	molybdate transport system permease protein	modB	27.4034	56.3593	0.486227
	peg.3449	K00426	cytochrome bd ubiquinol oxidase subunit II [EC:1.10.3.14]	cydB	26.3972	55.8185	0.472911
	peg.346	K07636	two-component system, OmpR family, phosphate regulon sensor histidine kinase PhoR [EC:2.7.13.3]	phoR	17.0241	39.511	0.430871
	peg.72	K02017	molybdate transport system ATP-binding protein [EC:3.6.3.29]	modC	17.9708	41.9903	0.427976
	peg.410	K03110	fused signal recognition particle receptor	ftsY	20.9384	50.1282	0.417697
	peg.1823	K11607	manganese/iron transport system ATP-binding protein	sitB	16.9251	41.4	0.408819
	peg.615	K09816	zinc transport system permease protein	znuB	35.7995	88.725	0.403488
	peg.1000	K13924	two-component system, chemotaxis family, CheB/CheR fusion protein [EC:2.1.1.80 3.1.1.61]	cheBR	20.8739	55.6397	0.375162
	peg.1273	K02016	iron complex transport system substrate-binding protein	ABC.FEV.S	19.8336	53.3869	0.371507
	peg.3476	K07638	two-component system, OmpR family, osmolarity sensor histidine kinase EnvZ [EC:2.7.13.3]	envZ	17.419	48.3221	0.360477
	peg.3038	K18893	ATP-binding cassette, subfamily B, multidrug efflux pump	vcaM	17.5973	49.2622	0.357217
	peg.3448	K00425	cytochrome bd ubiquinol oxidase subunit I [EC:1.10.3.14]	cydA	17.7203	50.7186	0.349385
	peg.2118	K11074	putrescine transport system permease protein	potI	16.8284	48.4066	0.347648
	peg.3082	K09970	general L-amino acid transport system permease protein	aapQ, bztB	14.6991	42.607	0.344991
	peg.325	K00990	[protein-PII] uridylyltransferase [EC:2.7.7.59]	glnD	16.3475	47.742	0.342414
	peg.3083	K09971	general L-amino acid transport system permease protein	aapM, bztC	10.6281	32.0126	0.331998
	peg.3216	K11688	C4-dicarboxylate-binding protein DctP	dctP	18.5122	59.2199	0.312601
	peg.365	K02194	heme exporter protein B	ccmB	11.7373	37.5574	0.312517
	peg.2679	K05966	triphosphoribosyl-dephospho-CoA synthase [EC:2.4.2.52]	citG	14.7342	47.4368	0.310607
	peg.201	K02011	iron(III) transport system permease protein	afuB, fbpB	10.2432	33.9123	0.302051
	peg.2998	K02259	cytochrome c oxidase assembly protein subunit 15	COX15, ctaA	13.6062	47.3183	0.287547
	peg.458	K02036	phosphate transport system ATP-binding protein [EC:7.3.2.1]	pstB	16.5452	60.2152	0.274768
	peg.3353	K02045	sulfate transport system ATP-binding protein [EC:3.6.3.25]	cysA	17.3685	63.2411	0.27464
	peg.2108	K01915	glutamine synthetase [EC:6.3.1.2]	glnA, GLUL	14.482	53.0546	0.272963
	peg.3362	K02048	sulfate transport system substrate-binding protein	cysP, sbp	13.0007	48.9386	0.265653
	peg.1822	K11604	manganese/iron transport system substrate-binding protein	sitA	15.6259	59.4836	0.262693
	peg.2962	K03406	methyl-accepting chemotaxis protein	mcp	25.6718	108.547	0.236504
	peg.2117	K11075	putrescine transport system permease protein	potH	14.8269	70.3971	0.210618
	peg.859	K08738	cytochrome c	CYC	13.4107	66.3646	0.202075
	peg.1825	K11606	manganese/iron transport system permease protein	sitD	9.1851	45.6979	0.200996
	peg.1934	K02010	iron(III) transport system ATP-binding protein [EC:3.6.3.30]	afuC, fbpC	18.4862	93.0103	0.198755
	peg.460	K02037	phosphate transport system permease protein	pstC	10.6683	56.5549	0.188636
	peg.459	K02038	phosphate transport system permease protein	pstA	10.2394	56.0551	0.182668
	peg.3213	K11690	C4-dicarboxylate transporter, DctM subunit	dctM	9.55101	53.3989	0.178862
	peg.2116	K11076	putrescine transport system ATP-binding protein	potG	9.69092	54.8586	0.176653
	peg.1824	K11605	manganese/iron transport system permease protein	sitC	7.87864	44.8692	0.175591
	peg.3052	K05685	macrolide transport system ATP-binding/permease protein [EC:3.6.3.-]	macB	7.90279	45.1889	0.174884
	peg.2347	K03076	preprotein translocase subunit SecY	secY	12.8347	74.7662	0.171665
	peg.2633	K02013	iron complex transport system ATP-binding protein [EC:3.6.3.34]	ABC.FEV.A	17.2478	104.755	0.16465
	peg.3288	K07675	two-component system, NarL family, sensor histidine kinase UhpB [EC:2.7.13.3]	uhpB	9.11187	59.44	0.153295
	peg.1850	K03406	methyl-accepting chemotaxis protein	mcp	5.80635	40.7149	0.14261
	peg.528	K03116	sec-independent protein translocase protein TatA	tatA	11.8001	102.991	0.114574
	peg.3214	K11689	C4-dicarboxylate transporter, DctQ subunit	dctQ	11.5307	107.438	0.107324
	peg.3354	K02047	sulfate transport system permease protein	cysW	9.94288	93.1468	0.106744
	peg.3355	K02046	sulfate transport system permease protein	cysU	7.73252	73.8044	0.10477
	peg.2631	K02016	iron complex transport system substrate-binding protein	ABC.FEV.S	37.7887	373.053	0.101296
	peg.3360	K02048	sulfate transport system substrate-binding protein	cysP, sbp	5.928	59.9168	0.0989372
	peg.2632	K02015	iron complex transport system permease protein	ABC.FEV.P	16.2709	173.042	0.0940288
	peg.930	K00626	acetyl-CoA C-acetyltransferase [EC:2.3.1.9]	E2.3.1.9, atoB	3.51126	43.0016	0.0816542
	peg.966	K03205	type IV secretion system protein VirD4	virD4, lvhD4	3.06299	37.8093	0.0810115
	peg.752	K03205	type IV secretion system protein VirD4	virD4, lvhD4	2.21451	54.1524	0.040894
	peg.1229	K03205	type IV secretion system protein VirD4	virD4, lvhD4	0.4203	38.9635	0.010787
04013 MAPK signaling pathway - fly [PATH:ko04013]
	peg.1551	K04564	superoxide dismutase, Fe-Mn family [EC:1.15.1.1]	SOD2	65.6695	99.6407	0.659064
	peg.3054	K04564	superoxide dismutase, Fe-Mn family [EC:1.15.1.1]	SOD2	224.024	230.136	0.973444
04016 MAPK signaling pathway - plant [PATH:ko04016]
	peg.1323	K00940	nucleoside-diphosphate kinase [EC:2.7.4.6]	ndk, NME	136.864	66.5828	2.05555
	peg.697	K17686	Cu+-exporting ATPase [EC:3.6.3.54]	copA, ATP7	5.77188	45.8866	0.125786
	peg.1508	K03781	catalase [EC:1.11.1.6]	katE, CAT, catB, srpA	153.056	103.993	1.4718
04011 MAPK signaling pathway - yeast [PATH:ko04011]
	peg.1508	K03781	catalase [EC:1.11.1.6]	katE, CAT, catB, srpA	153.056	103.993	1.4718
04066 HIF-1 signaling pathway [PATH:ko04066]
	peg.1691	K00134	glyceraldehyde 3-phosphate dehydrogenase [EC:1.2.1.12]	GAPDH, gapA	100.388	48.6348	2.06411
	peg.2211	K01689	enolase [EC:4.2.1.11]	ENO, eno	150.806	38.4777	3.91931
	peg.2213	K00161	pyruvate dehydrogenase E1 component alpha subunit [EC:1.2.4.1]	PDHA, pdhA	49.1949	46.2904	1.06275
	peg.2214	K00162	pyruvate dehydrogenase E1 component beta subunit [EC:1.2.4.1]	PDHB, pdhB	24.2642	53.618	0.452539
04068 FoxO signaling pathway [PATH:ko04068]
	peg.140	K11434	type I protein arginine methyltransferase [EC:2.1.1.319]	PRMT1	12.8832	40.5915	0.317386
	peg.1508	K03781	catalase [EC:1.11.1.6]	katE, CAT, catB, srpA	153.056	103.993	1.4718
	peg.1551	K04564	superoxide dismutase, Fe-Mn family [EC:1.15.1.1]	SOD2	65.6695	99.6407	0.659064
	peg.3054	K04564	superoxide dismutase, Fe-Mn family [EC:1.15.1.1]	SOD2	224.024	230.136	0.973444
	peg.14	K01596	phosphoenolpyruvate carboxykinase (GTP) [EC:4.1.1.32]	E4.1.1.32, pckA, PCK	45.7187	47.7748	0.956963
04070 Phosphatidylinositol signaling system [PATH:ko04070]
	peg.1681	K01092	myo-inositol-1(or 4)-monophosphatase [EC:3.1.3.25]	E3.1.3.25, IMPA, suhB	17.5853	29.5136	0.595838
	peg.3119	K01092	myo-inositol-1(or 4)-monophosphatase [EC:3.1.3.25]	E3.1.3.25, IMPA, suhB	60.3377	53.643	1.1248
	peg.2782	K00981	phosphatidate cytidylyltransferase [EC:2.7.7.41]	E2.7.7.41, CDS1, CDS2, cdsA	13.8844	34.5283	0.402118
04151 PI3K-Akt signaling pathway [PATH:ko04151]
	peg.14	K01596	phosphoenolpyruvate carboxykinase (GTP) [EC:4.1.1.32]	E4.1.1.32, pckA, PCK	45.7187	47.7748	0.956963
04152 AMPK signaling pathway [PATH:ko04152]
	peg.1198	K03841	fructose-1,6-bisphosphatase I [EC:3.1.3.11]	FBP, fbp	52.5902	155.278	0.338685
	peg.14	K01596	phosphoenolpyruvate carboxykinase (GTP) [EC:4.1.1.32]	E4.1.1.32, pckA, PCK	45.7187	47.7748	0.956963
09133 Signaling molecules and interaction
04080 Neuroactive ligand-receptor interaction [PATH:ko04080]
	peg.1034	K05770	translocator protein	TSPO, BZRP	17.197	61.397	0.280095
09140 Cellular Processes
09145 Cellular community - prokaryotes
02024 Quorum sensing [PATH:ko02024]
05111 Biofilm formation - Vibrio cholerae [PATH:ko05111]
02025 Biofilm formation - Pseudomonas aeruginosa [PATH:ko02025]
02026 Biofilm formation - Escherichia coli [PATH:ko02026]
09142 Cell motility
02030 Bacterial chemotaxis [PATH:ko02030]
02040 Flagellar assembly [PATH:ko02040]
	peg.2891	K03073	preprotein translocase subunit SecE	secE	527.512	148.3	3.55707
	peg.376	K03071	preprotein translocase subunit SecB	secB	314.642	91.0618	3.45526
	peg.825	K02408	flagellar hook-basal body complex protein FliE	fliE	236.539	100.771	2.34728
	peg.1942	K03210	preprotein translocase subunit YajC	yajC	138.218	63.4143	2.1796
	peg.2230	K03666	host factor-I protein	hfq	586.203	285.92	2.05024
	peg.824	K02388	flagellar basal-body rod protein FlgC	flgC	216.26	105.565	2.04859
	peg.823	K02387	flagellar basal-body rod protein FlgB	flgB	231.92	117.184	1.97911
	peg.2407	K06204	DnaK suppressor protein	dksA	153.381	78.6721	1.94962
	peg.833	K02406	flagellin	fliC	1101.06	595.791	1.84806
	peg.1674	K03075	preprotein translocase subunit SecG	secG	96.6206	52.6408	1.83547
	peg.834	K02406	flagellin	fliC	483.311	264.472	1.82745
	peg.102	K03413	two-component system, chemotaxis family, chemotaxis protein CheY	cheY	364.409	199.472	1.82686
	peg.826	K02392	flagellar basal-body rod protein FlgG	flgG	130.598	72.1192	1.81086
	peg.800	K02390	flagellar hook protein FlgE	flgE	270.83	165.869	1.63279
	peg.2848	K03076	preprotein translocase subunit SecY	secY	115.021	72.6959	1.58222
	peg.806	K02389	flagellar basal-body rod modification protein FlgD	flgD	267.784	170.02	1.57501
	peg.3169	K03413	two-component system, chemotaxis family, chemotaxis protein CheY	cheY	370.797	249.981	1.4833
	peg.807	K02420	flagellar biosynthetic protein FliQ	fliQ	203.241	137.745	1.47549
	peg.846	K03408	purine-binding chemotaxis protein CheW	cheW	153.042	103.953	1.47223
	peg.844	K00575	chemotaxis protein methyltransferase CheR [EC:2.1.1.80]	cheR	100.803	68.6402	1.46856
	peg.3310	K03413	two-component system, chemotaxis family, chemotaxis protein CheY	cheY	105.881	73.401	1.44249
	peg.617	K09823	Fur family transcriptional regulator, zinc uptake regulator	zur	268.487	188.231	1.42637
	peg.845	K03413	two-component system, chemotaxis family, chemotaxis protein CheY	cheY	206.613	145.069	1.42424
	peg.803	K02397	flagellar hook-associated protein 3 FlgL	flgL	174.96	123.739	1.41394
	peg.802	K02396	flagellar hook-associated protein 1 FlgK	flgK	121.25	86.3157	1.40473
	peg.801	K02390	flagellar hook protein FlgE	flgE	231.464	173.955	1.3306
	peg.1095	K03070	preprotein translocase subunit SecA	secA	106.082	82.4195	1.28709
	peg.2402	K03406	methyl-accepting chemotaxis protein	mcp	169.084	131.708	1.28378
	peg.2883	K01626	3-deoxy-7-phosphoheptulonate synthase [EC:2.5.1.54]	E2.5.1.54, aroF, aroG, aroH	88.1476	68.9395	1.27862
	peg.552	K03217	YidC/Oxa1 family membrane protein insertase	yidC, spoIIIJ, OXA1, ccfA	48.3901	42.8721	1.12871
	peg.847	K03407	two-component system, chemotaxis family, sensor kinase CheA [EC:2.7.13.3]	cheA	130.028	115.494	1.12584
	peg.818	K02417	flagellar motor switch protein FliN/FliY	fliNY, fliN	72.8873	64.8403	1.1241
	peg.836	K02409	flagellar M-ring protein FliF	fliF	70.1096	64.4676	1.08752
	peg.2344	K01999	branched-chain amino acid transport system substrate-binding protein	livK	71.3435	67.3632	1.05909
	peg.835	K02406	flagellin	fliC	238.446	226.436	1.05304
	peg.3148	K03100	signal peptidase I [EC:3.4.21.89]	lepB	74.6975	72.7881	1.02623
	peg.2343	K01999	branched-chain amino acid transport system substrate-binding protein	livK	57.1805	57.4547	0.995228
	peg.103	K03412	two-component system, chemotaxis family, protein-glutamate methylesterase/glutaminase [EC:3.1.1.61 3.5.1.44]	cheB	46.3791	48.4144	0.957961
	peg.850	K02410	flagellar motor switch protein FliG	fliG	56.3891	59.8359	0.942395
	peg.2338	K01997	branched-chain amino acid transport system permease protein	livH	54.8728	59.2077	0.926784
	peg.3475	K07659	two-component system, OmpR family, phosphate regulon response regulator OmpR	ompR	47.771	51.9502	0.919555
	peg.1140	K03406	methyl-accepting chemotaxis protein	mcp	111.291	121.561	0.915513
	peg.2340	K01995	branched-chain amino acid transport system ATP-binding protein	livG	37.2934	40.9155	0.911473
	peg.416	K03106	signal recognition particle subunit SRP54 [EC:3.6.5.4]	SRP54, ffh	39.1606	43.8314	0.893438
	peg.2341	K01996	branched-chain amino acid transport system ATP-binding protein	livF	39.2489	44.1347	0.889297
	peg.3131	K02557	chemotaxis protein MotB	motB	51.7621	60.6373	0.853634
	peg.849	K02416	flagellar motor switch protein FliM	fliM	62.4207	73.4215	0.85017
	peg.817	K02556	chemotaxis protein MotA	motA	72.5197	88.6981	0.817601
	peg.815	K02391	flagellar basal-body rod protein FlgF	flgF	74.6449	92.5595	0.806454
	peg.827	K02386	flagella basal body P-ring formation protein FlgA	flgA	51.0724	64.5203	0.791571
	peg.3111	K04761	LysR family transcriptional regulator, hydrogen peroxide-inducible genes activator	oxyR	37.1147	46.9026	0.791314
	peg.3002	K01991	polysaccharide biosynthesis/export protein	wza, gfcE	43.8168	55.8853	0.784049
	peg.2494	K00640	serine O-acetyltransferase [EC:2.3.1.30]	cysE	30.7228	40.5421	0.757799
	peg.3520	K09823	Fur family transcriptional regulator, zinc uptake regulator	zur	75.6661	100.07	0.75613
	peg.2339	K01998	branched-chain amino acid transport system permease protein	livM	38.0493	50.4792	0.753762
	peg.2070	K03406	methyl-accepting chemotaxis protein	mcp	40.3114	53.8573	0.748486
	peg.1678	K01657	anthranilate synthase component I [EC:4.1.3.27]	trpE	25.0831	34.0572	0.736499
	peg.828	K02394	flagellar P-ring protein precursor FlgI	flgI	43.5798	61.279	0.711169
	peg.808	K02400	flagellar biosynthesis protein FlhA	flhA	38.8736	57.4895	0.676186
	peg.917	K16011	mannose-1-phosphate guanylyltransferase / mannose-6-phosphate isomerase [EC:2.7.7.13 5.3.1.8]	algA, xanB, rfbA, wbpW, pslB	32.6799	49.1305	0.665166
	peg.2258	K01658	anthranilate synthase component II [EC:4.1.3.27]	trpG	48.0625	72.2733	0.66501
	peg.830	K02393	flagellar L-ring protein precursor FlgH	flgH	46.0753	69.8488	0.659644
	peg.814	K02412	flagellum-specific ATP synthase [EC:7.1.2.2]	fliI	30.8379	49.0627	0.62854
	peg.633	K03092	RNA polymerase sigma-54 factor	rpoN	31.0337	49.7536	0.623749
	peg.62	K10914	CRP/FNR family transcriptional regulator, cyclic AMP receptor protein	crp	32.9597	56.0668	0.587865
	peg.838	K02557	chemotaxis protein MotB	motB	36.5273	65.0887	0.561193
	peg.2784	K11749	regulator of sigma E protease [EC:3.4.24.-]	rseP	25.6715	49.9221	0.514232
	peg.832	K02419	flagellar biosynthetic protein FliP	fliP	39.9813	78.6498	0.508346
	peg.2088	K02410	flagellar motor switch protein FliG	fliG	32.3866	64.4964	0.502145
	peg.2329	K01897	long-chain acyl-CoA synthetase [EC:6.2.1.3]	ACSL, fadD	34.1953	69.7136	0.490511
	peg.2724	K06998	trans-2,3-dihydro-3-hydroxyanthranilate isomerase [EC:5.3.3.17]	phzF	14.0553	30.02	0.468198
	peg.410	K03110	fused signal recognition particle receptor	ftsY	20.9384	50.1282	0.417697
	peg.1000	K13924	two-component system, chemotaxis family, CheB/CheR fusion protein [EC:2.1.1.80 3.1.1.61]	cheBR	20.8739	55.6397	0.375162
	peg.3476	K07638	two-component system, OmpR family, osmolarity sensor histidine kinase EnvZ [EC:2.7.13.3]	envZ	17.419	48.3221	0.360477
	peg.1241	K09823	Fur family transcriptional regulator, zinc uptake regulator	zur	17.4779	49.1809	0.35538
	peg.819	K02401	flagellar biosynthetic protein FlhB	flhB	32.13	102.72	0.312791
	peg.809	K02421	flagellar biosynthetic protein FliR	fliR	22.1651	72.1785	0.307087
	peg.63	K01768	adenylate cyclase [EC:4.6.1.1]	E4.6.1.1	14.6477	52.7341	0.277765
	peg.2090	K02035	peptide/nickel transport system substrate-binding protein	ABC.PE.S	16.3954	65.9555	0.248582
	peg.896	K16554	polysaccharide biosynthesis transport protein	exoP, vpsO	18.1088	74.9368	0.241655
	peg.2962	K03406	methyl-accepting chemotaxis protein	mcp	25.6718	108.547	0.236504
	peg.1888	K11752	diaminohydroxyphosphoribosylaminopyrimidine deaminase / 5-amino-6-(5-phosphoribosylamino)uracil reductase [EC:3.5.4.26 1.1.1.193]	ribD	9.80348	53.3002	0.18393
	peg.2347	K03076	preprotein translocase subunit SecY	secY	12.8347	74.7662	0.171665
	peg.1850	K03406	methyl-accepting chemotaxis protein	mcp	5.80635	40.7149	0.14261
	peg.1770	K01768	adenylate cyclase [EC:4.6.1.1]	E4.6.1.1	5.00679	61.2229	0.0817796
	peg.2761	K00640	serine O-acetyltransferase [EC:2.3.1.30]	cysE	1.44671	44.9276	0.0322009
09141 Transport and catabolism
04146 Peroxisome [PATH:ko04146]
	peg.2329	K01897	long-chain acyl-CoA synthetase [EC:6.2.1.3]	ACSL, fadD	34.1953	69.7136	0.490511
	peg.653	K00830	alanine-glyoxylate transaminase / serine-glyoxylate transaminase / serine-pyruvate transaminase [EC:2.6.1.44 2.6.1.45 2.6.1.51]	AGXT	86.6661	53.1429	1.63081
	peg.3208	K00830	alanine-glyoxylate transaminase / serine-glyoxylate transaminase / serine-pyruvate transaminase [EC:2.6.1.44 2.6.1.45 2.6.1.51]	AGXT	688.29	104.794	6.56805
	peg.2373	K00031	isocitrate dehydrogenase [EC:1.1.1.42]	IDH1, IDH2, icd	70.3629	54.4509	1.29223
	peg.1508	K03781	catalase [EC:1.11.1.6]	katE, CAT, catB, srpA	153.056	103.993	1.4718
	peg.1551	K04564	superoxide dismutase, Fe-Mn family [EC:1.15.1.1]	SOD2	65.6695	99.6407	0.659064
	peg.3054	K04564	superoxide dismutase, Fe-Mn family [EC:1.15.1.1]	SOD2	224.024	230.136	0.973444
04138 Autophagy - yeast [PATH:ko04138]
	peg.232	K06902	MFS transporter, UMF1 family	UMF1	13.1105	48.7159	0.269121
09143 Cell growth and death
04112 Cell cycle - Caulobacter [PATH:ko04112]
	peg.179	K02313	chromosomal replication initiator protein	dnaA	185.655	72.1571	2.57292
	peg.2295	K02314	replicative DNA helicase [EC:3.6.4.12]	dnaB	46.8059	44.8481	1.04365
	peg.156	K13583	GcrA cell cycle regulator	gcrA	161.601	55.1411	2.93068
	peg.974	K13583	GcrA cell cycle regulator	gcrA	35.9158	65.457	0.548694
	peg.1836	K13584	two-component system, cell cycle response regulator CtrA	ctrA	431.451	195.143	2.21094
	peg.1139	K13581	modification methylase [EC:2.1.1.72]	ccrM	52.5005	88.5936	0.592599
	peg.2041	K01338	ATP-dependent Lon protease [EC:3.4.21.53]	lon	350.613	251.324	1.39507
	peg.3324	K03531	cell division protein FtsZ	ftsZ	154.591	84.5726	1.82791
	peg.3326	K03589	cell division protein FtsQ	ftsQ	62.9701	78.1847	0.805402
	peg.3325	K03590	cell division protein FtsA	ftsA	254.562	144.443	1.76237
	peg.3331	K03588	cell division protein FtsW	ftsW, spoVE	11.2717	36.8166	0.306156
	peg.3330	K02563	UDP-N-acetylglucosamine--N-acetylmuramyl-(pentapeptide) pyrophosphoryl-undecaprenol N-acetylglucosamine transferase [EC:2.4.1.227]	murG	13.7068	49.6459	0.276091
	peg.26	K13582	localization factor PodJL	podJ	69.6777	72.2518	0.964374
	peg.2422	K06985	aspartyl protease family protein	K06985	36.5073	32.8134	1.11257
	peg.2423	K06985	aspartyl protease family protein	K06985	41.1844	39.7533	1.036
	peg.2784	K11749	regulator of sigma E protease [EC:3.4.24.-]	rseP	25.6715	49.9221	0.514232
	peg.2420	K07716	two-component system, cell cycle sensor histidine kinase PleC [EC:2.7.13.3]	pleC	51.5427	48.7772	1.0567
	peg.3201	K07716	two-component system, cell cycle sensor histidine kinase PleC [EC:2.7.13.3]	pleC	57.1046	63.5617	0.898412
	peg.2056	K11443	two-component system, cell cycle response regulator DivK	divK	174.263	83.3125	2.09168
	peg.2459	K13587	two-component system, cell cycle sensor histidine kinase and response regulator CckA [EC:2.7.13.3]	cckA	52.1532	36.1091	1.44432
	peg.3168	K13588	histidine phosphotransferase ChpT	chpT	72.6369	49.8562	1.45693
	peg.3117	K13589	two-component system, cell cycle response regulator CpdR	cpdR	85.1591	64.6179	1.31789
	peg.2040	K03544	ATP-dependent Clp protease ATP-binding subunit ClpX	clpX, CLPX	371.513	192.643	1.9285
	peg.2039	K01358	ATP-dependent Clp protease, protease subunit [EC:3.4.21.92]	clpP, CLPP	281.438	126.7	2.22129
	peg.2057	K02488	two-component system, cell cycle response regulator [EC:2.7.7.65]	pleD	62.727	64.9655	0.965542
	peg.2033	K13590	diguanylate cyclase [EC:2.7.7.65]	dgcB	16.1809	50.6907	0.319208
	peg.2734	K13590	diguanylate cyclase [EC:2.7.7.65]	dgcB	97.5203	112.24	0.868852
	peg.1950	K13592	regulator of CtrA degradation	rcdA	259.44	164.672	1.5755
	peg.1955	K13593	cyclic-di-GMP phosphodiesterase, flagellum assembly factor TipF	tipF	78.11	48.4404	1.6125
	peg.1092	K02651	pilus assembly protein Flp/PilA	flp, pilA	173.827	145.478	1.19487
	peg.1093	K02651	pilus assembly protein Flp/PilA	flp, pilA	2360.85	1279.35	1.84536
04113 Meiosis - yeast [PATH:ko04113]
	peg.63	K01768	adenylate cyclase [EC:4.6.1.1]	E4.6.1.1	14.6477	52.7341	0.277765
	peg.1770	K01768	adenylate cyclase [EC:4.6.1.1]	E4.6.1.1	5.00679	61.2229	0.0817796
04210 Apoptosis [PATH:ko04210]
	peg.859	K08738	cytochrome c	CYC	13.4107	66.3646	0.202075
	peg.1072	K08738	cytochrome c	CYC	225.121	130.784	1.72132
	peg.2671	K08738	cytochrome c	CYC	3058.27	228.899	13.3608
04214 Apoptosis - fly [PATH:ko04214]
	peg.859	K08738	cytochrome c	CYC	13.4107	66.3646	0.202075
	peg.1072	K08738	cytochrome c	CYC	225.121	130.784	1.72132
	peg.2671	K08738	cytochrome c	CYC	3058.27	228.899	13.3608
	peg.1034	K05770	translocator protein	TSPO, BZRP	17.197	61.397	0.280095
04215 Apoptosis - multiple species [PATH:ko04215]
	peg.859	K08738	cytochrome c	CYC	13.4107	66.3646	0.202075
	peg.1072	K08738	cytochrome c	CYC	225.121	130.784	1.72132
	peg.2671	K08738	cytochrome c	CYC	3058.27	228.899	13.3608
04216 Ferroptosis [PATH:ko04216]
	peg.2329	K01897	long-chain acyl-CoA synthetase [EC:6.2.1.3]	ACSL, fadD	34.1953	69.7136	0.490511
04217 Necroptosis [PATH:ko04217]
	peg.1976	K01915	glutamine synthetase [EC:6.3.1.2]	glnA, GLUL	1385.18	74.9914	18.4712
	peg.2108	K01915	glutamine synthetase [EC:6.3.1.2]	glnA, GLUL	14.482	53.0546	0.272963
	peg.2112	K01915	glutamine synthetase [EC:6.3.1.2]	glnA, GLUL	38.1	68.8007	0.553774
	peg.2273	K01915	glutamine synthetase [EC:6.3.1.2]	glnA, GLUL	24.6766	43.3146	0.569705
04115 p53 signaling pathway [PATH:ko04115]
	peg.859	K08738	cytochrome c	CYC	13.4107	66.3646	0.202075
	peg.1072	K08738	cytochrome c	CYC	225.121	130.784	1.72132
	peg.2671	K08738	cytochrome c	CYC	3058.27	228.899	13.3608
09150 Organismal Systems
09151 Immune system
04621 NOD-like receptor signaling pathway [PATH:ko04621]
	peg.3490	K03671	thioredoxin 1	trxA	675.449	245.54	2.75087
	peg.833	K02406	flagellin	fliC	1101.06	595.791	1.84806
	peg.834	K02406	flagellin	fliC	483.311	264.472	1.82745
	peg.835	K02406	flagellin	fliC	238.446	226.436	1.05304
09152 Endocrine system
04910 Insulin signaling pathway [PATH:ko04910]
	peg.1198	K03841	fructose-1,6-bisphosphatase I [EC:3.1.3.11]	FBP, fbp	52.5902	155.278	0.338685
	peg.14	K01596	phosphoenolpyruvate carboxykinase (GTP) [EC:4.1.1.32]	E4.1.1.32, pckA, PCK	45.7187	47.7748	0.956963
04922 Glucagon signaling pathway [PATH:ko04922]
	peg.140	K11434	type I protein arginine methyltransferase [EC:2.1.1.319]	PRMT1	12.8832	40.5915	0.317386
	peg.14	K01596	phosphoenolpyruvate carboxykinase (GTP) [EC:4.1.1.32]	E4.1.1.32, pckA, PCK	45.7187	47.7748	0.956963
	peg.401	K01834	2,3-bisphosphoglycerate-dependent phosphoglycerate mutase [EC:5.4.2.11]	PGAM, gpmA	142.634	80.1865	1.77878
	peg.3114	K00873	pyruvate kinase [EC:2.7.1.40]	PK, pyk	77.0844	46.8015	1.64705
	peg.2213	K00161	pyruvate dehydrogenase E1 component alpha subunit [EC:1.2.4.1]	PDHA, pdhA	49.1949	46.2904	1.06275
	peg.2214	K00162	pyruvate dehydrogenase E1 component beta subunit [EC:1.2.4.1]	PDHB, pdhB	24.2642	53.618	0.452539
04920 Adipocytokine signaling pathway [PATH:ko04920]
	peg.2329	K01897	long-chain acyl-CoA synthetase [EC:6.2.1.3]	ACSL, fadD	34.1953	69.7136	0.490511
	peg.14	K01596	phosphoenolpyruvate carboxykinase (GTP) [EC:4.1.1.32]	E4.1.1.32, pckA, PCK	45.7187	47.7748	0.956963
03320 PPAR signaling pathway [PATH:ko03320]
	peg.2329	K01897	long-chain acyl-CoA synthetase [EC:6.2.1.3]	ACSL, fadD	34.1953	69.7136	0.490511
	peg.14	K01596	phosphoenolpyruvate carboxykinase (GTP) [EC:4.1.1.32]	E4.1.1.32, pckA, PCK	45.7187	47.7748	0.956963
04918 Thyroid hormone synthesis [PATH:ko04918]
	peg.1736	K00432	glutathione peroxidase [EC:1.11.1.9]	gpx	37.7009	98.6546	0.382151
	peg.2075	K00383	glutathione reductase (NADPH) [EC:1.8.1.7]	GSR, gor	16.2366	69.9235	0.232205
09153 Circulatory system
04260 Cardiac muscle contraction [PATH:ko04260]
	peg.3019	K00411	ubiquinol-cytochrome c reductase iron-sulfur subunit [EC:1.10.2.2]	UQCRFS1, RIP1, petA	681.851	93.5398	7.28942
	peg.3018	K00412	ubiquinol-cytochrome c reductase cytochrome b subunit	CYTB, petB	499.747	81.4987	6.13196
09154 Digestive system
04979 Cholesterol metabolism [PATH:ko04979]
	peg.1034	K05770	translocator protein	TSPO, BZRP	17.197	61.397	0.280095
09155 Excretory system
04964 Proximal tubule bicarbonate reclamation [PATH:ko04964]
	peg.14	K01596	phosphoenolpyruvate carboxykinase (GTP) [EC:4.1.1.32]	E4.1.1.32, pckA, PCK	45.7187	47.7748	0.956963
09156 Nervous system
04724 Glutamatergic synapse [PATH:ko04724]
	peg.1976	K01915	glutamine synthetase [EC:6.3.1.2]	glnA, GLUL	1385.18	74.9914	18.4712
	peg.2108	K01915	glutamine synthetase [EC:6.3.1.2]	glnA, GLUL	14.482	53.0546	0.272963
	peg.2112	K01915	glutamine synthetase [EC:6.3.1.2]	glnA, GLUL	38.1	68.8007	0.553774
	peg.2273	K01915	glutamine synthetase [EC:6.3.1.2]	glnA, GLUL	24.6766	43.3146	0.569705
04727 GABAergic synapse [PATH:ko04727]
	peg.1976	K01915	glutamine synthetase [EC:6.3.1.2]	glnA, GLUL	1385.18	74.9914	18.4712
	peg.2108	K01915	glutamine synthetase [EC:6.3.1.2]	glnA, GLUL	14.482	53.0546	0.272963
	peg.2112	K01915	glutamine synthetase [EC:6.3.1.2]	glnA, GLUL	38.1	68.8007	0.553774
	peg.2273	K01915	glutamine synthetase [EC:6.3.1.2]	glnA, GLUL	24.6766	43.3146	0.569705
09149 Aging
04211 Longevity regulating pathway [PATH:ko04211]
	peg.1551	K04564	superoxide dismutase, Fe-Mn family [EC:1.15.1.1]	SOD2	65.6695	99.6407	0.659064
	peg.3054	K04564	superoxide dismutase, Fe-Mn family [EC:1.15.1.1]	SOD2	224.024	230.136	0.973444
	peg.1508	K03781	catalase [EC:1.11.1.6]	katE, CAT, catB, srpA	153.056	103.993	1.4718
04212 Longevity regulating pathway - worm [PATH:ko04212]
	peg.1551	K04564	superoxide dismutase, Fe-Mn family [EC:1.15.1.1]	SOD2	65.6695	99.6407	0.659064
	peg.3054	K04564	superoxide dismutase, Fe-Mn family [EC:1.15.1.1]	SOD2	224.024	230.136	0.973444
	peg.1508	K03781	catalase [EC:1.11.1.6]	katE, CAT, catB, srpA	153.056	103.993	1.4718
	peg.2039	K01358	ATP-dependent Clp protease, protease subunit [EC:3.4.21.92]	clpP, CLPP	281.438	126.7	2.22129
	peg.789	K04043	molecular chaperone DnaK	dnaK, HSPA9	432.411	330.957	1.30655
	peg.3035	K04077	chaperonin GroEL	groEL, HSPD1	169.472	55.2249	3.06876
	peg.3049	K04077	chaperonin GroEL	groEL, HSPD1	516.422	181.336	2.84787
04213 Longevity regulating pathway - multiple species [PATH:ko04213]
	peg.1551	K04564	superoxide dismutase, Fe-Mn family [EC:1.15.1.1]	SOD2	65.6695	99.6407	0.659064
	peg.3054	K04564	superoxide dismutase, Fe-Mn family [EC:1.15.1.1]	SOD2	224.024	230.136	0.973444
	peg.1508	K03781	catalase [EC:1.11.1.6]	katE, CAT, catB, srpA	153.056	103.993	1.4718
	peg.63	K01768	adenylate cyclase [EC:4.6.1.1]	E4.6.1.1	14.6477	52.7341	0.277765
	peg.1770	K01768	adenylate cyclase [EC:4.6.1.1]	E4.6.1.1	5.00679	61.2229	0.0817796
	peg.663	K03695	ATP-dependent Clp protease ATP-binding subunit ClpB	clpB	85.5833	115.478	0.741122
09159 Environmental adaptation
04714 Thermogenesis [PATH:ko04714]
	peg.2329	K01897	long-chain acyl-CoA synthetase [EC:6.2.1.3]	ACSL, fadD	34.1953	69.7136	0.490511
	peg.3019	K00411	ubiquinol-cytochrome c reductase iron-sulfur subunit [EC:1.10.2.2]	UQCRFS1, RIP1, petA	681.851	93.5398	7.28942
	peg.3018	K00412	ubiquinol-cytochrome c reductase cytochrome b subunit	CYTB, petB	499.747	81.4987	6.13196
	peg.1108	K02257	heme o synthase [EC:2.5.1.141]	COX10, ctaB, cyoE	79.2753	117.536	0.674477
	peg.1110	K02258	cytochrome c oxidase assembly protein subunit 11	COX11, ctaG	70.1654	83.1378	0.843965
	peg.2998	K02259	cytochrome c oxidase assembly protein subunit 15	COX15, ctaA	13.6062	47.3183	0.287547
04626 Plant-pathogen interaction [PATH:ko04626]
	peg.833	K02406	flagellin	fliC	1101.06	595.791	1.84806
	peg.834	K02406	flagellin	fliC	483.311	264.472	1.82745
	peg.835	K02406	flagellin	fliC	238.446	226.436	1.05304
	peg.1916	K12340	outer membrane protein	tolC	191.602	72.7599	2.63335
09160 Human Diseases
09161 Cancers: Overview
05200 Pathways in cancer [PATH:ko05200]
	peg.859	K08738	cytochrome c	CYC	13.4107	66.3646	0.202075
	peg.1072	K08738	cytochrome c	CYC	225.121	130.784	1.72132
	peg.2671	K08738	cytochrome c	CYC	3058.27	228.899	13.3608
	peg.630	K00799	glutathione S-transferase [EC:2.5.1.18]	GST, gst	40.2607	58.9037	0.683501
	peg.1082	K00799	glutathione S-transferase [EC:2.5.1.18]	GST, gst	55.8415	79.49	0.702497
	peg.1794	K00799	glutathione S-transferase [EC:2.5.1.18]	GST, gst	22.5185	93.8506	0.23994
	peg.3276	K00799	glutathione S-transferase [EC:2.5.1.18]	GST, gst	20.739	50.2493	0.412722
	peg.3185	K01679	fumarate hydratase, class II [EC:4.2.1.2]	E4.2.1.2B, fumC, FH	25.6695	51.4536	0.498887
05230 Central carbon metabolism in cancer [PATH:ko05230]
	peg.3114	K00873	pyruvate kinase [EC:2.7.1.40]	PK, pyk	77.0844	46.8015	1.64705
	peg.2213	K00161	pyruvate dehydrogenase E1 component alpha subunit [EC:1.2.4.1]	PDHA, pdhA	49.1949	46.2904	1.06275
	peg.2214	K00162	pyruvate dehydrogenase E1 component beta subunit [EC:1.2.4.1]	PDHB, pdhB	24.2642	53.618	0.452539
	peg.401	K01834	2,3-bisphosphoglycerate-dependent phosphoglycerate mutase [EC:5.4.2.11]	PGAM, gpmA	142.634	80.1865	1.77878
05206 MicroRNAs in cancer [PATH:ko05206]
	peg.1217	K00558	DNA (cytosine-5)-methyltransferase 1 [EC:2.1.1.37]	DNMT1, dcm	29.8675	79.0089	0.378027
05205 Proteoglycans in cancer [PATH:ko05205]
	peg.3147	K03685	ribonuclease III [EC:3.1.26.3]	rnc, DROSHA, RNT1	23.6027	38.5059	0.612963
05204 Chemical carcinogenesis [PATH:ko05204]
	peg.630	K00799	glutathione S-transferase [EC:2.5.1.18]	GST, gst	40.2607	58.9037	0.683501
	peg.1082	K00799	glutathione S-transferase [EC:2.5.1.18]	GST, gst	55.8415	79.49	0.702497
	peg.1794	K00799	glutathione S-transferase [EC:2.5.1.18]	GST, gst	22.5185	93.8506	0.23994
	peg.3276	K00799	glutathione S-transferase [EC:2.5.1.18]	GST, gst	20.739	50.2493	0.412722
05203 Viral carcinogenesis [PATH:ko05203]
	peg.3114	K00873	pyruvate kinase [EC:2.7.1.40]	PK, pyk	77.0844	46.8015	1.64705
09162 Cancers: Specific types
05210 Colorectal cancer [PATH:ko05210]
	peg.859	K08738	cytochrome c	CYC	13.4107	66.3646	0.202075
	peg.1072	K08738	cytochrome c	CYC	225.121	130.784	1.72132
	peg.2671	K08738	cytochrome c	CYC	3058.27	228.899	13.3608
05225 Hepatocellular carcinoma [PATH:ko05225]
	peg.630	K00799	glutathione S-transferase [EC:2.5.1.18]	GST, gst	40.2607	58.9037	0.683501
	peg.1082	K00799	glutathione S-transferase [EC:2.5.1.18]	GST, gst	55.8415	79.49	0.702497
	peg.1794	K00799	glutathione S-transferase [EC:2.5.1.18]	GST, gst	22.5185	93.8506	0.23994
	peg.3276	K00799	glutathione S-transferase [EC:2.5.1.18]	GST, gst	20.739	50.2493	0.412722
05211 Renal cell carcinoma [PATH:ko05211]
	peg.3185	K01679	fumarate hydratase, class II [EC:4.2.1.2]	E4.2.1.2B, fumC, FH	25.6695	51.4536	0.498887
05222 Small cell lung cancer [PATH:ko05222]
	peg.859	K08738	cytochrome c	CYC	13.4107	66.3646	0.202075
	peg.1072	K08738	cytochrome c	CYC	225.121	130.784	1.72132
	peg.2671	K08738	cytochrome c	CYC	3058.27	228.899	13.3608
09164 Neurodegenerative diseases
05010 Alzheimer disease [PATH:ko05010]
	peg.1691	K00134	glyceraldehyde 3-phosphate dehydrogenase [EC:1.2.1.12]	GAPDH, gapA	100.388	48.6348	2.06411
	peg.3019	K00411	ubiquinol-cytochrome c reductase iron-sulfur subunit [EC:1.10.2.2]	UQCRFS1, RIP1, petA	681.851	93.5398	7.28942
	peg.3018	K00412	ubiquinol-cytochrome c reductase cytochrome b subunit	CYTB, petB	499.747	81.4987	6.13196
	peg.859	K08738	cytochrome c	CYC	13.4107	66.3646	0.202075
	peg.1072	K08738	cytochrome c	CYC	225.121	130.784	1.72132
	peg.2671	K08738	cytochrome c	CYC	3058.27	228.899	13.3608
05012 Parkinson disease [PATH:ko05012]
	peg.3019	K00411	ubiquinol-cytochrome c reductase iron-sulfur subunit [EC:1.10.2.2]	UQCRFS1, RIP1, petA	681.851	93.5398	7.28942
	peg.3018	K00412	ubiquinol-cytochrome c reductase cytochrome b subunit	CYTB, petB	499.747	81.4987	6.13196
	peg.859	K08738	cytochrome c	CYC	13.4107	66.3646	0.202075
	peg.1072	K08738	cytochrome c	CYC	225.121	130.784	1.72132
	peg.2671	K08738	cytochrome c	CYC	3058.27	228.899	13.3608
05014 Amyotrophic lateral sclerosis (ALS) [PATH:ko05014]
	peg.859	K08738	cytochrome c	CYC	13.4107	66.3646	0.202075
	peg.1072	K08738	cytochrome c	CYC	225.121	130.784	1.72132
	peg.2671	K08738	cytochrome c	CYC	3058.27	228.899	13.3608
	peg.1508	K03781	catalase [EC:1.11.1.6]	katE, CAT, catB, srpA	153.056	103.993	1.4718
05016 Huntington disease [PATH:ko05016]
	peg.1551	K04564	superoxide dismutase, Fe-Mn family [EC:1.15.1.1]	SOD2	65.6695	99.6407	0.659064
	peg.3054	K04564	superoxide dismutase, Fe-Mn family [EC:1.15.1.1]	SOD2	224.024	230.136	0.973444
	peg.3019	K00411	ubiquinol-cytochrome c reductase iron-sulfur subunit [EC:1.10.2.2]	UQCRFS1, RIP1, petA	681.851	93.5398	7.28942
	peg.3018	K00412	ubiquinol-cytochrome c reductase cytochrome b subunit	CYTB, petB	499.747	81.4987	6.13196
	peg.859	K08738	cytochrome c	CYC	13.4107	66.3646	0.202075
	peg.1072	K08738	cytochrome c	CYC	225.121	130.784	1.72132
	peg.2671	K08738	cytochrome c	CYC	3058.27	228.899	13.3608
09166 Cardiovascular diseases
05418 Fluid shear stress and atherosclerosis [PATH:ko05418]
	peg.630	K00799	glutathione S-transferase [EC:2.5.1.18]	GST, gst	40.2607	58.9037	0.683501
	peg.1082	K00799	glutathione S-transferase [EC:2.5.1.18]	GST, gst	55.8415	79.49	0.702497
	peg.1794	K00799	glutathione S-transferase [EC:2.5.1.18]	GST, gst	22.5185	93.8506	0.23994
	peg.3276	K00799	glutathione S-transferase [EC:2.5.1.18]	GST, gst	20.739	50.2493	0.412722
	peg.3490	K03671	thioredoxin 1	trxA	675.449	245.54	2.75087
	peg.221	K01940	argininosuccinate synthase [EC:6.3.4.5]	argG, ASS1	57.0245	56.0559	1.01728
05416 Viral myocarditis [PATH:ko05416]
	peg.859	K08738	cytochrome c	CYC	13.4107	66.3646	0.202075
	peg.1072	K08738	cytochrome c	CYC	225.121	130.784	1.72132
	peg.2671	K08738	cytochrome c	CYC	3058.27	228.899	13.3608
09167 Endocrine and metabolic diseases
04930 Type II diabetes mellitus [PATH:ko04930]
	peg.3114	K00873	pyruvate kinase [EC:2.7.1.40]	PK, pyk	77.0844	46.8015	1.64705
04940 Type I diabetes mellitus [PATH:ko04940]
	peg.3035	K04077	chaperonin GroEL	groEL, HSPD1	169.472	55.2249	3.06876
	peg.3049	K04077	chaperonin GroEL	groEL, HSPD1	516.422	181.336	2.84787
04932 Non-alcoholic fatty liver disease (NAFLD) [PATH:ko04932]
	peg.859	K08738	cytochrome c	CYC	13.4107	66.3646	0.202075
	peg.1072	K08738	cytochrome c	CYC	225.121	130.784	1.72132
	peg.2671	K08738	cytochrome c	CYC	3058.27	228.899	13.3608
	peg.3019	K00411	ubiquinol-cytochrome c reductase iron-sulfur subunit [EC:1.10.2.2]	UQCRFS1, RIP1, petA	681.851	93.5398	7.28942
	peg.3018	K00412	ubiquinol-cytochrome c reductase cytochrome b subunit	CYTB, petB	499.747	81.4987	6.13196
04931 Insulin resistance [PATH:ko04931]
	peg.14	K01596	phosphoenolpyruvate carboxykinase (GTP) [EC:4.1.1.32]	E4.1.1.32, pckA, PCK	45.7187	47.7748	0.956963
	peg.2081	K00820	glucosamine---fructose-6-phosphate aminotransferase (isomerizing) [EC:2.6.1.16]	glmS, GFPT	54.9143	51.6767	1.06265
04934 Cushing syndrome [PATH:ko04934]
	peg.3185	K01679	fumarate hydratase, class II [EC:4.2.1.2]	E4.2.1.2B, fumC, FH	25.6695	51.4536	0.498887
09171 Infectious diseases: Bacterial
05120 Epithelial cell signaling in Helicobacter pylori infection [PATH:ko05120]
	peg.1493	K08303	putative protease [EC:3.4.-.-]	K08303	427.674	61.2428	6.98326
05132 Salmonella infection [PATH:ko05132]
	peg.833	K02406	flagellin	fliC	1101.06	595.791	1.84806
	peg.834	K02406	flagellin	fliC	483.311	264.472	1.82745
	peg.835	K02406	flagellin	fliC	238.446	226.436	1.05304
	peg.1646	K13771	Rrf2 family transcriptional regulator, nitric oxide-sensitive transcriptional repressor	nsrR	93.8285	181.698	0.516399
05133 Pertussis [PATH:ko05133]
	peg.1916	K12340	outer membrane protein	tolC	191.602	72.7599	2.63335
05134 Legionellosis [PATH:ko05134]
	peg.3035	K04077	chaperonin GroEL	groEL, HSPD1	169.472	55.2249	3.06876
	peg.3049	K04077	chaperonin GroEL	groEL, HSPD1	516.422	181.336	2.84787
	peg.859	K08738	cytochrome c	CYC	13.4107	66.3646	0.202075
	peg.1072	K08738	cytochrome c	CYC	225.121	130.784	1.72132
	peg.2671	K08738	cytochrome c	CYC	3058.27	228.899	13.3608
	peg.349	K00239	succinate dehydrogenase / fumarate reductase, flavoprotein subunit [EC:1.3.5.1 1.3.5.4]	sdhA, frdA	33.2725	47.7428	0.696911
	peg.691	K03596	GTP-binding protein LepA	lepA	50.762	47.122	1.07725
	peg.833	K02406	flagellin	fliC	1101.06	595.791	1.84806
	peg.834	K02406	flagellin	fliC	483.311	264.472	1.82745
	peg.835	K02406	flagellin	fliC	238.446	226.436	1.05304
05152 Tuberculosis [PATH:ko05152]
	peg.859	K08738	cytochrome c	CYC	13.4107	66.3646	0.202075
	peg.1072	K08738	cytochrome c	CYC	225.121	130.784	1.72132
	peg.2671	K08738	cytochrome c	CYC	3058.27	228.899	13.3608
	peg.461	K02040	phosphate transport system substrate-binding protein	pstS	146.034	100.3	1.45598
	peg.789	K04043	molecular chaperone DnaK	dnaK, HSPA9	432.411	330.957	1.30655
	peg.3035	K04077	chaperonin GroEL	groEL, HSPD1	169.472	55.2249	3.06876
	peg.3049	K04077	chaperonin GroEL	groEL, HSPD1	516.422	181.336	2.84787
09172 Infectious diseases: Viral
05166 Human T-cell leukemia virus 1 infection [PATH:ko05166]
	peg.1034	K05770	translocator protein	TSPO, BZRP	17.197	61.397	0.280095
05170 Human immunodeficiency virus 1 infection [PATH:ko05170]
	peg.859	K08738	cytochrome c	CYC	13.4107	66.3646	0.202075
	peg.1072	K08738	cytochrome c	CYC	225.121	130.784	1.72132
	peg.2671	K08738	cytochrome c	CYC	3058.27	228.899	13.3608
05164 Influenza A [PATH:ko05164]
	peg.859	K08738	cytochrome c	CYC	13.4107	66.3646	0.202075
	peg.1072	K08738	cytochrome c	CYC	225.121	130.784	1.72132
	peg.2671	K08738	cytochrome c	CYC	3058.27	228.899	13.3608
05161 Hepatitis B [PATH:ko05161]
	peg.859	K08738	cytochrome c	CYC	13.4107	66.3646	0.202075
	peg.1072	K08738	cytochrome c	CYC	225.121	130.784	1.72132
	peg.2671	K08738	cytochrome c	CYC	3058.27	228.899	13.3608
05168 Herpes simplex infection [PATH:ko05168]
	peg.859	K08738	cytochrome c	CYC	13.4107	66.3646	0.202075
	peg.1072	K08738	cytochrome c	CYC	225.121	130.784	1.72132
	peg.2671	K08738	cytochrome c	CYC	3058.27	228.899	13.3608
05163 Human cytomegalovirus infection [PATH:ko05163]
	peg.859	K08738	cytochrome c	CYC	13.4107	66.3646	0.202075
	peg.1072	K08738	cytochrome c	CYC	225.121	130.784	1.72132
	peg.2671	K08738	cytochrome c	CYC	3058.27	228.899	13.3608
05167 Kaposi sarcoma-associated herpesvirus infection [PATH:ko05167]
	peg.859	K08738	cytochrome c	CYC	13.4107	66.3646	0.202075
	peg.1072	K08738	cytochrome c	CYC	225.121	130.784	1.72132
	peg.2671	K08738	cytochrome c	CYC	3058.27	228.899	13.3608
05165 Human papillomavirus infection [PATH:ko05165]
	peg.3114	K00873	pyruvate kinase [EC:2.7.1.40]	PK, pyk	77.0844	46.8015	1.64705
09174 Infectious diseases: Parasitic
05145 Toxoplasmosis [PATH:ko05145]
	peg.859	K08738	cytochrome c	CYC	13.4107	66.3646	0.202075
	peg.1072	K08738	cytochrome c	CYC	225.121	130.784	1.72132
	peg.2671	K08738	cytochrome c	CYC	3058.27	228.899	13.3608
05142 Chagas disease (American trypanosomiasis) [PATH:ko05142]
	peg.2557	K01354	oligopeptidase B [EC:3.4.21.83]	ptrB	33.4198	62.6599	0.533352
05143 African trypanosomiasis [PATH:ko05143]
	peg.2557	K01354	oligopeptidase B [EC:3.4.21.83]	ptrB	33.4198	62.6599	0.533352
	peg.1731	K14475	inhibitor of cysteine peptidase	ICP	88.6048	77.5706	1.14225
09175 Drug resistance: Antimicrobial
01501 beta-Lactam resistance [PATH:ko01501]
	peg.1931	K01207	beta-N-acetylhexosaminidase [EC:3.2.1.52]	nagZ	23.8109	32.5247	0.732085
	peg.263	K03585	membrane fusion protein, multidrug efflux system	acrA, mexA, adeI, smeD, mtrC, cmeA	71.2386	55.6794	1.27944
	peg.298	K03585	membrane fusion protein, multidrug efflux system	acrA, mexA, adeI, smeD, mtrC, cmeA	2.77687	47.4075	0.0585745
	peg.1958	K03585	membrane fusion protein, multidrug efflux system	acrA, mexA, adeI, smeD, mtrC, cmeA	28.3577	58.6808	0.483254
	peg.1957	K18138	multidrug efflux pump	acrB, mexB, adeJ, smeE, mtrD, cmeB	10.0746	38.9804	0.258452
	peg.1916	K12340	outer membrane protein	tolC	191.602	72.7599	2.63335
	peg.1051	K05366	penicillin-binding protein 1A [EC:2.4.1.129 3.4.16.4]	mrcA	57.0862	61.8127	0.923536
	peg.2541	K05366	penicillin-binding protein 1A [EC:2.4.1.129 3.4.16.4]	mrcA	35.4981	55.0559	0.644765
	peg.3546	K05366	penicillin-binding protein 1A [EC:2.4.1.129 3.4.16.4]	mrcA	12.0203	44.134	0.272359
	peg.3382	K03587	cell division protein FtsI (penicillin-binding protein 3) [EC:3.4.16.4]	ftsI	20.4218	40.1002	0.50927
	peg.2143	K17838	beta-lactamase class D [EC:3.5.2.6]	oxa	21.885	51.2909	0.426684
01502 Vancomycin resistance [PATH:ko01502]
	peg.3327	K01921	D-alanine-D-alanine ligase [EC:6.3.2.4]	ddl	56.1355	74.693	0.751551
	peg.2296	K01775	alanine racemase [EC:5.1.1.1]	alr	10.2246	27.6526	0.369754
	peg.3335	K01929	UDP-N-acetylmuramoyl-tripeptide--D-alanyl-D-alanine ligase [EC:6.3.2.10]	murF	21.8419	50.5388	0.432182
	peg.3334	K01000	phospho-N-acetylmuramoyl-pentapeptide-transferase [EC:2.7.8.13]	mraY	23.2383	101.558	0.228818
	peg.3330	K02563	UDP-N-acetylglucosamine--N-acetylmuramyl-(pentapeptide) pyrophosphoryl-undecaprenol N-acetylglucosamine transferase [EC:2.4.1.227]	murG	13.7068	49.6459	0.276091
01503 Cationic antimicrobial peptide (CAMP) resistance [PATH:ko01503]
	peg.1052	K01448	N-acetylmuramoyl-L-alanine amidase [EC:3.5.1.28]	amiABC	65.0969	84.6644	0.768882
	peg.1373	K01448	N-acetylmuramoyl-L-alanine amidase [EC:3.5.1.28]	amiABC	123.246	136.079	0.905696
	peg.2515	K04771	serine protease Do [EC:3.4.21.107]	degP, htrA	330.069	171.287	1.927
	peg.3195	K04771	serine protease Do [EC:3.4.21.107]	degP, htrA	55.2938	70.823	0.780732
	peg.263	K03585	membrane fusion protein, multidrug efflux system	acrA, mexA, adeI, smeD, mtrC, cmeA	71.2386	55.6794	1.27944
	peg.298	K03585	membrane fusion protein, multidrug efflux system	acrA, mexA, adeI, smeD, mtrC, cmeA	2.77687	47.4075	0.0585745
	peg.1958	K03585	membrane fusion protein, multidrug efflux system	acrA, mexA, adeI, smeD, mtrC, cmeA	28.3577	58.6808	0.483254
	peg.1957	K18138	multidrug efflux pump	acrB, mexB, adeJ, smeE, mtrD, cmeB	10.0746	38.9804	0.258452
	peg.1916	K12340	outer membrane protein	tolC	191.602	72.7599	2.63335
	peg.2792	K00677	UDP-N-acetylglucosamine acyltransferase [EC:2.3.1.129]	lpxA	39.6853	46.4189	0.854938
09176 Drug resistance: Antineoplastic
01524 Platinum drug resistance [PATH:ko01524]
	peg.697	K17686	Cu+-exporting ATPase [EC:3.6.3.54]	copA, ATP7	5.77188	45.8866	0.125786
	peg.630	K00799	glutathione S-transferase [EC:2.5.1.18]	GST, gst	40.2607	58.9037	0.683501
	peg.1082	K00799	glutathione S-transferase [EC:2.5.1.18]	GST, gst	55.8415	79.49	0.702497
	peg.1794	K00799	glutathione S-transferase [EC:2.5.1.18]	GST, gst	22.5185	93.8506	0.23994
	peg.3276	K00799	glutathione S-transferase [EC:2.5.1.18]	GST, gst	20.739	50.2493	0.412722
	peg.859	K08738	cytochrome c	CYC	13.4107	66.3646	0.202075
	peg.1072	K08738	cytochrome c	CYC	225.121	130.784	1.72132
	peg.2671	K08738	cytochrome c	CYC	3058.27	228.899	13.3608
01523 Antifolate resistance [PATH:ko01523]
	peg.3191	K00560	thymidylate synthase [EC:2.1.1.45]	thyA, TYMS	49.2276	51.63	0.953468
	peg.3192	K00287	dihydrofolate reductase [EC:1.5.1.3]	DHFR, folA	37.3213	56.2374	0.663638
	peg.3377	K00287	dihydrofolate reductase [EC:1.5.1.3]	DHFR, folA	27.3264	56.4281	0.48427
	peg.1886	K00600	glycine hydroxymethyltransferase [EC:2.1.2.1]	glyA, SHMT	278.796	78.193	3.56549
	peg.1260	K00297	methylenetetrahydrofolate reductase (NADPH) [EC:1.5.1.20]	metF, MTHFR	4.3996	71.7754	0.0612967
	peg.2501	K00297	methylenetetrahydrofolate reductase (NADPH) [EC:1.5.1.20]	metF, MTHFR	173.24	312.344	0.554644
	peg.234	K00602	phosphoribosylaminoimidazolecarboxamide formyltransferase / IMP cyclohydrolase [EC:2.1.2.3 3.5.4.10]	purH	34.5951	62.4446	0.554013
09180 Brite Hierarchies
09181 Protein families: metabolism
01001 Protein kinases [BR:ko01001]
	peg.719	K07154	serine/threonine-protein kinase HipA [EC:2.7.11.1]	hipA	5.70595	38.7839	0.147122
	peg.346	K07636	two-component system, OmpR family, phosphate regulon sensor histidine kinase PhoR [EC:2.7.13.3]	phoR	17.0241	39.511	0.430871
	peg.3476	K07638	two-component system, OmpR family, osmolarity sensor histidine kinase EnvZ [EC:2.7.13.3]	envZ	17.419	48.3221	0.360477
	peg.11	K14980	two-component system, OmpR family, sensor histidine kinase ChvG [EC:2.7.13.3]	chvG	25.9318	33.7784	0.767705
	peg.2097	K07675	two-component system, NarL family, sensor histidine kinase UhpB [EC:2.7.13.3]	uhpB	25.5286	48.8324	0.522781
	peg.3288	K07675	two-component system, NarL family, sensor histidine kinase UhpB [EC:2.7.13.3]	uhpB	9.11187	59.44	0.153295
	peg.2225	K07708	two-component system, NtrC family, nitrogen regulation sensor histidine kinase GlnL [EC:2.7.13.3]	glnL, ntrB	26.4048	50.5691	0.522153
	peg.2227	K13598	two-component system, NtrC family, nitrogen regulation sensor histidine kinase NtrY [EC:2.7.13.3]	ntrY	34.3044	48.8931	0.70162
	peg.847	K03407	two-component system, chemotaxis family, sensor kinase CheA [EC:2.7.13.3]	cheA	130.028	115.494	1.12584
	peg.2420	K07716	two-component system, cell cycle sensor histidine kinase PleC [EC:2.7.13.3]	pleC	51.5427	48.7772	1.0567
	peg.3201	K07716	two-component system, cell cycle sensor histidine kinase PleC [EC:2.7.13.3]	pleC	57.1046	63.5617	0.898412
	peg.2459	K13587	two-component system, cell cycle sensor histidine kinase and response regulator CckA [EC:2.7.13.3]	cckA	52.1532	36.1091	1.44432
	peg.144	K15011	two-component system, sensor histidine kinase RegB [EC:2.7.13.3]	regB, regS, actS	45.3964	61.4224	0.739084
01009 Protein phosphatases and associated proteins [BR:ko01009]
	peg.7	K01251	adenosylhomocysteinase [EC:3.3.1.1]	E3.3.1.1, ahcY	283.049	189.222	1.49585
	peg.1299	K20074	PPM family protein phosphatase [EC:3.1.3.16]	prpC, phpP	109.075	88.3872	1.23406
	peg.2745	K01079	phosphoserine phosphatase [EC:3.1.3.3]	serB, PSPH	10.5573	46.1421	0.228799
01002 Peptidases [BR:ko01002]
	peg.3278	K03101	signal peptidase II [EC:3.4.23.36]	lspA	39.4011	76.7021	0.51369
	peg.1091	K02278	prepilin peptidase CpaA [EC:3.4.23.43]	cpaA, tadV	54.8362	98.0328	0.559366
	peg.3456	K01304	pyroglutamyl-peptidase [EC:3.4.19.3]	pcp	15.5592	51.6419	0.301289
	peg.1036	K01951	GMP synthase (glutamine-hydrolysing) [EC:6.3.5.2]	guaA, GMPS	28.8547	45.0362	0.6407
	peg.2109	K07010	putative glutamine amidotransferase	K07010	15.5453	39.191	0.396656
	peg.2299	K00764	amidophosphoribosyltransferase [EC:2.4.2.14]	purF, PPAT	112.239	70.6636	1.58836
	peg.3123	K00265	glutamate synthase (NADPH) large chain [EC:1.4.1.13]	gltB	49.7471	49.5822	1.00333
	peg.2081	K00820	glucosamine---fructose-6-phosphate aminotransferase (isomerizing) [EC:2.6.1.16]	glmS, GFPT	54.9143	51.6767	1.06265
	peg.85	K01953	asparagine synthase (glutamine-hydrolysing) [EC:6.3.5.4]	asnB, ASNS	30.0438	66.4112	0.45239
	peg.95	K01953	asparagine synthase (glutamine-hydrolysing) [EC:6.3.5.4]	asnB, ASNS	44.0461	68.9693	0.638634
	peg.98	K01953	asparagine synthase (glutamine-hydrolysing) [EC:6.3.5.4]	asnB, ASNS	14.8266	57.6692	0.257097
	peg.1849	K05520	protease I [EC:3.5.1.124]	pfpI	18.0222	72.509	0.248551
	peg.1685	K21470	L,D-transpeptidase YcbB	ycbB	91.4846	69.5159	1.31602
	peg.1884	K21470	L,D-transpeptidase YcbB	ycbB	32.4441	30.2808	1.07144
	peg.1894	K21470	L,D-transpeptidase YcbB	ycbB	148.383	81.6802	1.81663
	peg.2165	K21470	L,D-transpeptidase YcbB	ycbB	40.1743	59.5	0.675199
	peg.2506	K01256	aminopeptidase N [EC:3.4.11.2]	pepN	19.1326	50.6611	0.377659
	peg.313	K01284	peptidyl-dipeptidase Dcp [EC:3.4.15.5]	dcp	15.2964	42.1813	0.362635
	peg.3107	K08602	oligoendopeptidase F [EC:3.4.24.-]	pepF, pepB	53.8002	60.1528	0.894392
	peg.3461	K01400	bacillolysin [EC:3.4.24.28]	nprE	30.684	50.2928	0.610106
	peg.3280	K07263	zinc protease [EC:3.4.24.-]	pqqL	166.559	186.534	0.892918
	peg.3281	K07263	zinc protease [EC:3.4.24.-]	pqqL	123.593	118.771	1.0406
	peg.1081	K01255	leucyl aminopeptidase [EC:3.4.11.1]	CARP, pepA	12.1016	34.387	0.351924
	peg.2235	K01255	leucyl aminopeptidase [EC:3.4.11.1]	CARP, pepA	54.0917	41.9638	1.28901
	peg.1143	K01265	methionyl aminopeptidase [EC:3.4.11.18]	map	103.527	72.5198	1.42757
	peg.3318	K01262	Xaa-Pro aminopeptidase [EC:3.4.11.9]	pepP	10.9347	29.2243	0.374165
	peg.1715	K03798	cell division protease FtsH [EC:3.4.24.-]	ftsH, hflB	362.715	257.018	1.41125
	peg.237	K03799	heat shock protein HtpX [EC:3.4.24.-]	htpX	115.662	116.219	0.99521
	peg.2874	K03799	heat shock protein HtpX [EC:3.4.24.-]	htpX	17.3203	38.4663	0.450273
	peg.2784	K11749	regulator of sigma E protease [EC:3.4.24.-]	rseP	25.6715	49.9221	0.514232
	peg.1161	K07261	penicillin-insensitive murein DD-endopeptidase [EC:3.4.24.-]	mepA	83.2884	111.855	0.744611
	peg.2516	K04775	protease YdgD [EC:3.4.21.-]	ydgD	14.4102	46.3754	0.310729
	peg.2515	K04771	serine protease Do [EC:3.4.21.107]	degP, htrA	330.069	171.287	1.927
	peg.3195	K04771	serine protease Do [EC:3.4.21.107]	degP, htrA	55.2938	70.823	0.780732
	peg.2557	K01354	oligopeptidase B [EC:3.4.21.83]	ptrB	33.4198	62.6599	0.533352
	peg.2160	K07258	serine-type D-Ala-D-Ala carboxypeptidase (penicillin-binding protein 5/6) [EC:3.4.16.4]	dacC, dacA, dacD	43.8482	50.1029	0.875162
	peg.2039	K01358	ATP-dependent Clp protease, protease subunit [EC:3.4.21.92]	clpP, CLPP	281.438	126.7	2.22129
	peg.2041	K01338	ATP-dependent Lon protease [EC:3.4.21.53]	lon	350.613	251.324	1.39507
	peg.2267	K01356	repressor LexA [EC:3.4.21.88]	lexA	158.236	122.211	1.29478
	peg.3148	K03100	signal peptidase I [EC:3.4.21.89]	lepB	74.6975	72.7881	1.02623
	peg.174	K01259	proline iminopeptidase [EC:3.4.11.5]	pip	8.28158	63.2272	0.130981
	peg.3206	K01259	proline iminopeptidase [EC:3.4.11.5]	pip	11.9062	50.2917	0.236742
	peg.493	K03797	carboxyl-terminal processing protease [EC:3.4.21.102]	E3.4.21.102, prc, ctpA	252.306	200.884	1.25598
	peg.3501	K04773	protease IV [EC:3.4.21.-]	sppA	41.3175	54.3514	0.760191
	peg.168	K01419	ATP-dependent HslUV protease, peptidase subunit HslV [EC:3.4.25.2]	hslV, clpQ	59.8515	45.2356	1.3231
[truncated: 1,380 more rows]

## Sheet: All genes
													Ratio Biofilm/pure cult		Ratio -(pure cult/biofilm)
Gene tag and function (RAST)	Ratio Biofilm/pure cultures		Integenic sequence	Ratio Biofilm/pure cultures								Total	>5	2-5.	;-2-5	>-5
peg.2652;Copper-containing nitrite reductase (EC 1.7.2.1);Ontology_term=KEGG_ENZYME:1.7.2.1	54.6721		Non coding	26.1895							Total	4853	75	311	1422	901
peg.2653;Nitrite reductase accessory protein NirV	30.9613		Non coding	21.0952							Genes	3600	63	246	1019	564
peg.1908;hypothetical protein	25.7124		Non coding	15.0222							Integenic sequence	1253	12	65	403	337
peg.1907;Isocitrate lyase (EC 4.1.3.1);Ontology_term=KEGG_ENZYME:4.1.3.1	25.3798		Non coding	9.50525
peg.1463;TonB-dependent receptor	22.6636		Non coding	7.97484
peg.423;Nitrogen regulatory protein P-II	21.5656		Non coding	7.89592									>5	2-5.	;-2-5	>-5
peg.424;Ammonium transporter	19.7632		Non coding	7.76234							Total	4853	0.0154544	0.0640841	-0.293015	-0.185658
peg.2382;TonB-dependent receptor	18.9654		Non coding	6.61592							Genes	3600	0.0175	0.0683333	-0.283056	-0.156667
peg.1788;hypothetical protein	18.8666		Non coding	6.46997							Integenic sequence	1253	0.00957702	0.0518755	-0.321628	-0.268955
peg.2355;hypothetical protein	18.7746		Non coding	5.47406
peg.1976;Glutamine synthetase type I (EC 6.3.1.2);Ontology_term=KEGG_ENZYME:6.3.1.2	18.4712		Non coding	5.39966
peg.1787;hypothetical protein	16.208		Non coding	5.32723
peg.1789;TonB-dependent receptor	16.0652		Non coding	4.89305
peg.1909;Acyl-CoA hydrolase (EC 3.1.2.20);Ontology_term=KEGG_ENZYME:3.1.2.20	15.5838		Non coding	4.83061
peg.1904;Ribonucleotide reductase of class Ia (aerobic)2C alpha subunit (EC 1.17.4.1);Ontology_term=KEGG_ENZYME:1.17.4.1	14.4207		Non coding	4.72993
peg.1977;Nitrogen regulatory protein P-II	14.1407		Non coding	4.60765
peg.2671;Cytochrome c2	13.3608		Non coding	4.54371
peg.1903;Ribonucleotide reductase of class Ia (aerobic)2C beta subunit (EC 1.17.4.1);Ontology_term=KEGG_ENZYME:1.17.4.1	13.2061		Non coding	4.04629
peg.2822;Nitrate reductase cytochrome c550-type subunit	12.3358		Non coding	3.97919
peg.2383;Molybdate-binding domain of ModE	11.7909		Non coding	3.94902
peg.2574;hypothetical protein	9.87214		Non coding	3.69784
peg.1362;hypothetical protein	9.79019		Non coding	3.68599
peg.2313;hypothetical protein	9.77102		Non coding	3.67187
peg.2821;Cytochrome c-type protein NapC	9.35875		Non coding	3.64776
peg.2823;Periplasmic nitrate reductase precursor (EC 1.7.99.4);Ontology_term=KEGG_ENZYME:1.7.99.4	9.30989		Non coding	3.64492
peg.2022;Outer membrane protein W precursor	9.03759		Non coding	3.56872
peg.1910;Pseudo Reconstitué 5-methyltetrahydropteroyltriglutamate--homocysteine methyltransferase (EC 2.1.1.14);Ontology_term=KEGG_ENZYME:2.1.1.14	8.94748		Non coding	3.48995
peg.276;Nitrate ABC transporter2C nitrate-binding protein	8.84888		Non coding	3.46921
peg.2825;Ferredoxin-type protein NapF (periplasmic nitrate reductase)	8.61818		Non coding	3.44098
peg.2573;hypothetical protein	8.10729		Non coding	3.25126
peg.274;Nitrate ABC transporter2C ATP-binding protein	7.91166		Non coding	3.22608
peg.1623;Nitrous-oxide reductase (EC 1.7.99.6);Ontology_term=KEGG_ENZYME:1.7.99.6	7.8367		Non coding	3.06948
peg.1494;Sterol binding protein	7.53709		Non coding	3.06004
peg.2312;PseudoReconstitué NAD(P) transhydrogenase alpha subunit (EC 1.6.1.2);Ontology_term=KEGG_ENZYME:1.6.1.2	7.29852		Non coding	2.81689
peg.3019;Ubiquinol-cytochrome C reductase iron-sulfur subunit (EC 1.10.2.2);Ontology_term=KEGG_ENZYME:1.10.2.2	7.28942		Non coding	2.81529
peg.3323;UDP-3-O-[3-hydroxymyristoyl] N-acetylglucosamine deacetylase (EC 3.5.1.-);Ontology_term=KEGG_ENZYME:3.5.1.-	7.21697		Non coding	2.78826
peg.1493;Collagenase and related proteases	6.98326		Non coding	2.75114
peg.1501;Nitric-oxide reductase subunit B (EC 1.7.99.7);Ontology_term=KEGG_ENZYME:1.7.99.7	6.93736		Non coding	2.72093
peg.2826;Periplasmic nitrate reductase component NapE	6.63791		Non coding	2.62124
peg.3208;Serine--glyoxylate aminotransferase (EC 2.6.1.45);Ontology_term=KEGG_ENZYME:2.6.1.45	6.56805		Non coding	2.60195
peg.275;Nitrate ABC transporter2C permease protein	6.54802		Non coding	2.59221
peg.1874;Ribonucleotide reductase of class II (coenzyme B12-dependent) (EC 1.17.4.1);Ontology_term=KEGG_ENZYME:1.17.4.1	6.49192		Non coding	2.56877
peg.3477;Pyrroline-5-carboxylate reductase (EC 1.5.1.2);Ontology_term=KEGG_ENZYME:1.5.1.2	6.46717		Non coding	2.56514
peg.404;phasin	6.40764		Non coding	2.50063
peg.1502;Nitric oxide reductase activation protein NorQ	6.25085		Non coding	2.48245
peg.2590;NAD-dependent formate dehydrogenase gamma subunit	6.23464		Non coding	2.4796
peg.1488;predicted membrane protein	6.15301		Non coding	2.47505
peg.3018;PseudoReconstitué Ubiquinol--cytochrome c reductase2C cytochrome B subunit (EC 1.10.2.2);Ontology_term=KEGG_ENZYME:1.10.2.2	6.13196		Non coding	2.41894
peg.1487;Coenzyme PQQ synthesis protein E	5.9932		Non coding	2.38822
peg.1500;Nitric-oxide reductase subunit C (EC 1.7.99.7);Ontology_term=KEGG_ENZYME:1.7.99.7	5.97741		Non coding	2.38226
peg.1626;hypothetical protein	5.94742		Non coding	2.37223
peg.3393;hypothetical protein	5.94523		Non coding	2.35355
peg.2384;hypothetical protein	5.90751		Non coding	2.35136
peg.1442;Outer membrane vitamin B12 receptor BtuB	5.78589		Non coding	2.34897
peg.602;Acetoacetyl-CoA reductase (EC 1.1.1.36);Ontology_term=KEGG_ENZYME:1.1.1.36	5.71697		Non coding	2.32256
peg.1478;(3R)-hydroxymyristoyl-[acyl carrier protein] dehydratase (EC 4.2.1.-);Ontology_term=KEGG_ENZYME:4.2.1.-	5.64594		Non coding	2.31535
peg.2589;NAD-dependent formate dehydrogenase beta subunit	5.61912		Non coding	2.30154
peg.2873;SSU ribosomal protein S12p (S23e)	5.44789		Non coding	2.24324
peg.1129;ATP synthase C chain (EC 3.6.3.14);Ontology_term=KEGG_ENZYME:3.6.3.14	5.42162		Non coding	2.24222
peg.1622;Nitrous oxide reductase maturation protein NosD	5.33335		Non coding	2.22387
peg.1709;hypothetical protein	5.23497		Non coding	2.21482
peg.1479;Acyl carrier protein	5.16873		Non coding	2.20365
peg.2067;hypothetical protein	5.04591		Non coding	2.1984
peg.1477;beta-ketoacyl synthase	4.99844		Non coding	2.18465
peg.1936;Twin-arginine translocation protein TatB	4.95744		Non coding	2.17027
peg.2567;hypothetical protein	4.72028		Non coding	2.16805
peg.2846;SSU ribosomal protein S13p (S18e)	4.70554		Non coding	2.13479
peg.2824;NapD component of periplasmic nitrate reductase	4.65132		Non coding	2.115
peg.3305;cytochrome c1	4.63284		Non coding	2.11216
peg.2162;SSU ribosomal protein S21p	4.63235		Non coding	2.0873
peg.1619;Nitrous oxide reductase maturation protein2C outer-membrane lipoprotein NosL	4.42724		Non coding	2.08472
peg.1625;hypothetical protein	4.40554		Non coding	2.07998
peg.1497;hypothetical protein	4.37556		Non coding	2.07581
peg.202;YceI	4.32065		Non coding	2.05894
peg.683;LSU ribosomal protein L20p	4.31869		Non coding	2.04987
peg.1491;Glycine oxidase ThiO (EC 1.4.3.19);Ontology_term=KEGG_ENZYME:1.4.3.19	4.31781		Non coding	2.02803
peg.1492;FIG139928: Putative protease	4.28795		Non coding	2.02707
peg.1624;Nitrous oxide reductase maturation protein NosR	4.27382		Non coding	1.97876
peg.3254;hypothetical protein	4.22517		Non coding	1.97294
peg.3209;Malyl-CoA lyase (EC 4.1.3.24);Ontology_term=KEGG_ENZYME:4.1.3.24	4.22303		Non coding	1.95519
peg.1949;LSU ribosomal protein L31p	4.16418		Non coding	1.91785
peg.607;LSU ribosomal protein L32p	4.0991		Non coding	1.91667
peg.483;ATP synthase alpha chain (EC 3.6.3.14);Ontology_term=KEGG_ENZYME:3.6.3.14	4.09082		Non coding	1.90175
peg.3173;hypothetical protein	4.08026		Non coding	1.89453
peg.272;Ferredoxin--nitrite reductase (EC 1.7.7.1);Ontology_term=KEGG_ENZYME:1.7.7.1	4.06544		Non coding	1.89284
peg.2654;Nitric oxide -responding transcriptional regulator NnrR (Crp/Fnr family)	4.00462		Non coding	1.88393
peg.2464;hypothetical protein	3.99573		Non coding	1.88284
peg.1486;Coenzyme PQQ synthesis protein D	3.95577		Non coding	1.83931
peg.2211;Enolase (EC 4.2.1.11);Ontology_term=KEGG_ENZYME:4.2.1.11	3.91931		Non coding	1.82848
peg.1620;Nitrous oxide reductase maturation transmembrane protein NosY	3.87606		Non coding	1.82534
peg.1503;Nitric oxide reductase activation protein NorD	3.85286		Non coding	1.81437
peg.273;Nitrite reductase [NAD(P)H] large subunit (EC 1.7.1.4);Ontology_term=KEGG_ENZYME:1.7.1.4	3.85203		Non coding	1.81064
peg.2680;Formaldehyde activating enzyme	3.84383		Non coding	1.80966
peg.1462;Vitamin B12 ABC transporter2C B12-binding component BtuF	3.84378		Non coding	1.80228
peg.368;Aconitate hydratase (EC 4.2.1.3);Ontology_term=KEGG_ENZYME:4.2.1.3	3.80403		Non coding	1.79383
peg.1588;hypothetical protein	3.79241		Non coding	1.78894
peg.1475;Alcohol dehydrogenase (EC 1.1.1.1);Ontology_term=KEGG_ENZYME:1.1.1.1	3.76913		Non coding	1.78168
peg.2058;LSU ribosomal protein L33p @ LSU ribosomal protein L33p2C zinc-independent	3.73987		Non coding	1.77828
peg.1621;Nitrous oxide reductase maturation protein NosF (ATPase)	3.72702		Non coding	1.7601
peg.1885;5-aminolevulinate synthase (EC 2.3.1.37);Ontology_term=KEGG_ENZYME:2.3.1.37	3.70795		Non coding	1.74107
peg.682;LSU ribosomal protein L35p	3.6956		Non coding	1.73609
peg.2710;Formylmethanofuran dehydrogenase subunit A (EC 1.2.99.5);Ontology_term=KEGG_ENZYME:1.2.99.5	3.68079		Non coding	1.72304
peg.1474;Beta-ketoacyl synthase	3.66757		Non coding	1.72143
peg.2158;Acetyl-CoA:acetoacetyl-CoA transferase2C alpha subunit (EC 2.8.3.8);Ontology_term=KEGG_ENZYME:2.8.3.8	3.66151		Non coding	1.71481
rna.42;tRNA-Trp-CCA	3.65561		Non coding	1.71425
peg.2785;Outer membrane protein assembly factor YaeT precursor	3.65405		Non coding	1.7137
peg.1186;hypothetical protein	3.65289		Non coding	1.70883
rna.46;tRNA-Val-GAC	3.64493		Non coding	1.70584
peg.3249;NADH-ubiquinone oxidoreductase chain G (EC 1.6.5.3);Ontology_term=KEGG_ENZYME:1.6.5.3	3.64106		Non coding	1.70097
peg.481;ATP synthase delta chain (EC 3.6.3.14);Ontology_term=KEGG_ENZYME:3.6.3.14	3.6319		Non coding	1.69418
peg.3544;hypothetical protein	3.62261		Non coding	1.67916
peg.1886;Serine hydroxymethyltransferase (EC 2.1.2.1);Ontology_term=KEGG_ENZYME:2.1.2.1	3.56549		Non coding	1.65574
peg.1937;Twin-arginine translocation protein TatC	3.55806		Non coding	1.61622
peg.2891;Preprotein translocase subunit SecE (TC 3.A.5.1.1)	3.55707		Non coding	1.61302
peg.2709;Formylmethanofuran dehydrogenase subunit B (EC 1.2.99.5);Ontology_term=KEGG_ENZYME:1.2.99.5	3.54223		Non coding	1.6012
peg.2025;Peptidyl-prolyl cis-trans isomerase (EC 5.2.1.8);Ontology_term=KEGG_ENZYME:5.2.1.8	3.49611		Non coding	1.59876
peg.2657;Cold shock protein CspB	3.48154		Non coding	1.59859
peg.1489;Phosphoserine aminotransferase (EC 2.6.1.52);Ontology_term=KEGG_ENZYME:2.6.1.52	3.46449		Non coding	1.5952
peg.376;Protein export cytoplasm chaperone protein (SecB2C maintains protein to be exported in unfolded state)	3.45526		Non coding	1.59385
peg.581;protein of unknown function DUF218	3.45132		Non coding	1.59279
peg.3219;Formate--tetrahydrofolate ligase (EC 6.3.4.3);Ontology_term=KEGG_ENZYME:6.3.4.3	3.37794		Non coding	1.58488
peg.2675;Methylene tetrahydromethanopterin dehydrogenase (EC 1.5.99.9);Ontology_term=KEGG_ENZYME:1.5.99.9	3.36409		Non coding	1.58354
peg.1978;hypothetical protein	3.3539		Non coding	1.58025
peg.1128;ATP synthase B' chain (EC 3.6.3.14);Ontology_term=KEGG_ENZYME:3.6.3.14	3.35296		Non coding	1.55906
peg.2955;Cytochrome c-L precursor (Cytochrome c551I) (Cytochrome c552)	3.32462		Non coding	1.53657
peg.3246;NADH-ubiquinone oxidoreductase chain J (EC 1.6.5.3);Ontology_term=KEGG_ENZYME:1.6.5.3	3.31405		Non coding	1.53624
peg.2715;hypothetical protein	3.3025		Non coding	1.53608
peg.3034;Heat shock protein 60 family co-chaperone GroES	3.27714		Non coding	1.52896
peg.1437;cold shock protein	3.27062		Non coding	1.52742
peg.2872;SSU ribosomal protein S7p (S5e)	3.25254		Non coding	1.50847
peg.1878;hypothetical protein	3.23041		Non coding	1.49878
rna.12;tRNA-Ile-GAT	3.22581		Non coding	1.49876
peg.482;hypothetical protein	3.21668		Non coding	1.48513
peg.2376;Coenzyme PQQ synthesis protein C	3.1892		Non coding	1.47891
peg.181;SSU ribosomal protein S20p	3.17782		Non coding	1.47717
peg.3223;LSU ribosomal protein L27p	3.15457		Non coding	1.45063
peg.2046;NADH-ubiquinone oxidoreductase chain B (EC 1.6.5.3);Ontology_term=KEGG_ENZYME:1.6.5.3	3.13302		Non coding	1.43752
peg.271;Assimilatory nitrate reductase large subunit (EC:1.7.99.4);Ontology_term=KEGG_ENZYME:1.7.99.4	3.13095		Non coding	1.43501
peg.1654;hypothetical protein	3.12548		Non coding	1.43291
peg.2716;TonB-dependent receptor	3.12438		Non coding	1.42163
peg.489;ATP synthase epsilon chain (EC 3.6.3.14);Ontology_term=KEGG_ENZYME:3.6.3.14	3.07779		Non coding	1.41434
peg.2291;SSU ribosomal protein S6p	3.07452		Non coding	1.4121
peg.1582;Coproporphyrinogen III oxidase2C oxygen-independent (EC 1.3.99.22);Ontology_term=KEGG_ENZYME:1.3.99.22	3.07185		Non coding	1.40987
peg.1490;Dihydroorotate dehydrogenase (EC 1.3.3.1);Ontology_term=KEGG_ENZYME:1.3.3.1	3.07085		Non coding	1.4069
peg.3035;Heat shock protein 60 family chaperone GroEL	3.06876		Non coding	1.40448
peg.2843;LSU ribosomal protein L17p	3.06334		Non coding	1.3961
peg.372;Mlr4354 like protein	3.05758		Non coding	1.39284
peg.3172;hypothetical protein	3.05629		Non coding	1.39203
peg.1472;hypothetical protein	3.0553		Non coding	1.3851
peg.3347;hypothetical protein	3.04867		Non coding	1.3812
peg.1127;ATP synthase B chain (EC 3.6.3.14);Ontology_term=KEGG_ENZYME:3.6.3.14	3.04619		Non coding	1.38067
peg.1361;hypothetical protein	3.03931		Non coding	1.37394
peg.2588;NAD-dependent formate dehydrogenase alpha subunit	2.99021		Non coding	1.35604
peg.3210;Succinyl-CoA ligase [ADP-forming] beta chain (EC 6.2.1.5);Ontology_term=KEGG_ENZYME:6.2.1.5	2.98407		Non coding	1.35446
peg.1319;hypothetical protein	2.9734		Non coding	1.35
peg.1618;putative nosX	2.97214		Non coding	1.33488
peg.3519;S-adenosylmethionine decarboxylase proenzyme (EC 4.1.1.50)2C prokaryotic class 1B;Ontology_term=KEGG_ENZYME:4.1.1.50	2.96098		Non coding	1.31902
peg.2711;Formylmethanofuran--tetrahydromethanopterin N-formyltransferase (EC 2.3.1.101);Ontology_term=KEGG_ENZYME:2.3.1.101	2.95909		Non coding	1.31685
peg.40;Alpha/beta hydrolase	2.93347		Non coding	1.31591
peg.227;FIG005935: membrane protein	2.93188		Non coding	1.29978
peg.156;GcrA cell cycle regulator	2.93068		Non coding	1.29975
peg.3521;LSU ribosomal protein L25p	2.92771		Non coding	1.29845
peg.2045;NADH ubiquinone oxidoreductase chain A (EC 1.6.5.3);Ontology_term=KEGG_ENZYME:1.6.5.3	2.92683		Non coding	1.29653
peg.601;hypothetical protein	2.92397		Non coding	1.28609
peg.924;hypothetical protein	2.92348		Non coding	1.28595
peg.1935;Twin-arginine translocation protein TatA	2.90442		Non coding	1.27035
rna.50;tRNA-Ala-GGC	2.88533		Non coding	1.26579
peg.1476;3-oxoacyl-[acyl-carrier-protein] synthase2C KASII (EC 2.3.1.41);Ontology_term=KEGG_ENZYME:2.3.1.41	2.88449		Non coding	1.26267
peg.2212;hypothetical protein	2.88366		Non coding	1.25496
peg.3251;NADH-ubiquinone oxidoreductase chain E (EC 1.6.5.3);Ontology_term=KEGG_ENZYME:1.6.5.3	2.88176		Non coding	1.25387
peg.3015;Bacterioferritin	2.87564		Non coding	1.2505
rna.13;tRNA-Ala-TGC	2.86274		Non coding	1.25021
peg.2368;SSU ribosomal protein S4p (S9e)	2.85277		Non coding	1.24514
peg.3050;Heat shock protein 60 family co-chaperone GroES	2.84938		Non coding	1.2449
peg.3049;Heat shock protein 60 family chaperone GroEL	2.84787		Non coding	1.23492
peg.41;hypothetical protein	2.84182		Non coding	1.22747
peg.484;ATP synthase gamma chain (EC 3.6.3.14);Ontology_term=KEGG_ENZYME:3.6.3.14	2.82857		Non coding	1.22669
peg.2202;hypothetical protein	2.81594		Non coding	1.22484
peg.2200;hypothetical protein	2.81552		Non coding	1.21437
peg.1544;SSU ribosomal protein S15p (S13e)	2.81242		Non coding	1.21372
peg.2311;NAD(P) transhydrogenase subunit beta (EC 1.6.1.2);Ontology_term=KEGG_ENZYME:1.6.1.2	2.80789		Non coding	1.21333
peg.1504;Nitric oxide reductase activation protein NorE	2.79954		Non coding	1.21257
peg.2416;hypothetical protein	2.79347		Non coding	1.20518
peg.2742;Acetolactate synthase large subunit (EC 2.2.1.6);Ontology_term=KEGG_ENZYME:2.2.1.6	2.77752		Non coding	1.20513
peg.3256;FIG000557: hypothetical protein co-occurring with RecR	2.7764		Non coding	1.19524
peg.3152;DNA-directed RNA polymerase omega subunit (EC 2.7.7.6);Ontology_term=KEGG_ENZYME:2.7.7.6	2.7675		Non coding	1.19238
peg.3490;Thioredoxin	2.75087		Non coding	1.17853
peg.3379;Cell division protein MraZ	2.74525		Non coding	1.17672
peg.603;Acetyl-CoA acetyltransferase (EC 2.3.1.9);Ontology_term=KEGG_ENZYME:2.3.1.9	2.73773		Non coding	1.17161
rna.38;tRNA-Pro-TGG	2.73701		Non coding	1.17011
peg.1142;LSU ribosomal protein L19p	2.73595		Non coding	1.16475
peg.1480;3-oxoacyl-[acyl-carrier protein] reductase (EC 1.1.1.100);Ontology_term=KEGG_ENZYME:1.1.1.100	2.72187		Non coding	1.16288
peg.2354;hypothetical protein	2.70479		Non coding	1.16147
peg.2956;MxaJ2C protein involved in methanol oxidation	2.6918		Non coding	1.15817
peg.3250;NADH-ubiquinone oxidoreductase chain F (EC 1.6.5.3);Ontology_term=KEGG_ENZYME:1.6.5.3	2.68548		Non coding	1.15798
peg.334;Transglycosylase-associated protein	2.67934		Non coding	1.15267
peg.1121;hypothetical protein	2.67188		Non coding	1.15238
peg.1473;3-oxoacyl-[acyl-carrier-protein] synthase2C KASII (EC 2.3.1.41);Ontology_term=KEGG_ENZYME:2.3.1.41	2.66944		Non coding	1.15162
peg.467;Succinyl-CoA ligase [ADP-forming] beta chain (EC 6.2.1.5);Ontology_term=KEGG_ENZYME:6.2.1.5	2.66426		Non coding	1.15074
peg.2050;NADH-ubiquinone oxidoreductase chain D (EC 1.6.5.3);Ontology_term=KEGG_ENZYME:1.6.5.3	2.66139		Non coding	1.14623
peg.3222;LSU ribosomal protein L21p	2.66061		Non coding	1.14139
peg.679;Translation initiation factor 1	2.65089		Non coding	1.13999
peg.498;Electron transfer flavoprotein2C beta subunit	2.65035		Non coding	1.13823
peg.2047;NADH-ubiquinone oxidoreductase chain C (EC 1.6.5.3);Ontology_term=KEGG_ENZYME:1.6.5.3	2.64801		Non coding	1.13656
peg.1916;Type I secretion outer membrane protein2C TolC precursor	2.63335		Non coding	1.13154
peg.2642;NADH-UBIQUINONE OXIDOREDUCTASE 18 KD SUBUNIT (EC 1.6.5.3) (EC 1.6.99.3);Ontology_term=KEGG_ENZYME:1.6.5.3,KEGG_ENZYME:1.6.99.3	2.63247		Non coding	1.12558
peg.1871;hypothetical protein	2.62306		Non coding	1.12478
peg.1666;cold-shock DNA-binding domain protein	2.61168		Non coding	1.12292
peg.621;PseudoReconstitué Translation initiation factor 3	2.60719		Non coding	1.11057
peg.565;conserved hypothetical protein	2.60674		Non coding	1.10776
peg.2038;Cell division trigger factor (EC 5.2.1.8);Ontology_term=KEGG_ENZYME:5.2.1.8	2.59958		Non coding	1.10714
peg.1131;ATP synthase protein I	2.58825		Non coding	1.10055
rna.31;tRNA-Leu-TAG	2.58589		Non coding	1.09591
peg.2712;putative formylmethanofuran dehydrogenase2C subunit C( EC:1.2.99.5 );Ontology_term=KEGG_ENZYME:1.2.99.5	2.57729		Non coding	1.09332
peg.2270;Citrate synthase (si) (EC 2.3.3.1);Ontology_term=KEGG_ENZYME:2.3.3.1	2.57618		Non coding	1.08467
peg.179;Chromosomal replication initiator protein DnaA	2.57292		Non coding	1.08276
peg.1130;ATP synthase A chain (EC 3.6.3.14);Ontology_term=KEGG_ENZYME:3.6.3.14	2.57247		Non coding	1.08261
peg.1351;Quinolinate synthetase (EC 2.5.1.72);Ontology_term=KEGG_ENZYME:2.5.1.72	2.56606		Non coding	1.07651
peg.3248;NADH-ubiquinone oxidoreductase chain H (EC 1.6.5.3);Ontology_term=KEGG_ENZYME:1.6.5.3	2.55629		Non coding	1.07609
peg.1374;hypothetical protein	2.5514		Non coding	1.07175
peg.2497;hypothetical protein	2.54631		Non coding	1.06381
peg.2324;hypothetical protein	2.54276		Non coding	1.0628
peg.2886;LSU ribosomal protein L7/L12 (P1/P2)	2.51461		Non coding	1.05662
peg.1481;hypothetical protein	2.50963		Non coding	1.05312
peg.2844;DNA-directed RNA polymerase alpha subunit (EC 2.7.7.6);Ontology_term=KEGG_ENZYME:2.7.7.6	2.47869		Non coding	1.05244
peg.3533;Crotonyl-CoA carboxylase/reductase2C ethylmalonyl-CoA producing	2.47317		Non coding	1.04576
peg.3174;Cold shock protein CspA	2.46112		Non coding	1.04473
peg.2350;Phosphoribosylaminoimidazole-succinocarboxamide synthase (EC 6.3.2.6);Ontology_term=KEGG_ENZYME:6.3.2.6	2.45807		Non coding	1.04286
peg.2960;two component transcriptional regulator2C LuxR family	2.45117		Non coding	1.04122
peg.1807;Universal stress protein family	2.44885		Non coding	1.04114
peg.2717;Copper metallochaperone2C bacterial analog of Cox17 protein	2.43827		Non coding	1.03812
peg.1592;Cytochrome c oxidase subunit CcoN (EC 1.9.3.1);Ontology_term=KEGG_ENZYME:1.9.3.1	2.43362		Non coding	1.03201
peg.2286;Acyl carrier protein	2.42704		Non coding	1.02864
peg.1056;hypothetical protein	2.42133		Non coding	1.02412
peg.3247;NADH-ubiquinone oxidoreductase chain I (EC 1.6.5.3);Ontology_term=KEGG_ENZYME:1.6.5.3	2.41437		Non coding	1.02248
peg.2587;Formate dehydrogenase chain D (EC 1.2.1.2);Ontology_term=KEGG_ENZYME:1.2.1.2	2.40636		Non coding	1.01937
peg.1053;hypothetical protein	2.39774		Non coding	1.01595
peg.2887;LSU ribosomal protein L10p (P0)	2.37609		Non coding	1.00369
peg.3502;SSU ribosomal protein S1p	2.37386		Non coding	1.00359
peg.3116;LSU ribosomal protein L36p	2.37024		Non coding	1.00346
peg.1535;S-adenosylmethionine synthetase (EC 2.5.1.6);Ontology_term=KEGG_ENZYME:2.5.1.6	2.36991		Non coding	0.999141
peg.2737;Ketol-acid reductoisomerase (EC 1.1.1.86);Ontology_term=KEGG_ENZYME:1.1.1.86	2.36829		Non coding	0.99754
peg.69;hypothetical protein	2.36663		Non coding	0.991608
peg.1496;3-polyprenyl-4-hydroxybenzoate carboxy-lyase UbiX (EC 4.1.1.-);Ontology_term=KEGG_ENZYME:4.1.1.-	2.36518		Non coding	0.983927
peg.680;Cold shock protein CspA	2.35567		Non coding	0.982915
peg.1460;ABC transporter component( EC:3.6.3.41 );Ontology_term=KEGG_ENZYME:3.6.3.41	2.35256		Non coding	0.982143
peg.2215;hypothetical protein	2.35097		Non coding	0.967523
peg.825;Flagellar hook-basal body complex protein FliE	2.34728		Non coding	0.965206
peg.2954;Methanol dehydrogenase2C small subunit (EC 1.1.99.8);Ontology_term=KEGG_ENZYME:1.1.99.8	2.34264		Non coding	0.958988
peg.2222;Transcriptional regulator2C MarR family	2.32998		Non coding	0.958845
peg.1830;Phosphatidylethanolamine N-methyltransferase (EC 2.1.1.17);Ontology_term=KEGG_ENZYME:2.1.1.17	2.32842		Non coding	0.949799
peg.3244;NADH-ubiquinone oxidoreductase chain L (EC 1.6.5.3);Ontology_term=KEGG_ENZYME:1.6.5.3	2.31808		Non coding	0.947852
peg.2519;Cytochrome c-type biogenesis protein CcmE2C heme chaperone	2.31334		Non coding	0.947227
peg.2310;hypothetical protein	2.29697		Non coding	0.946425
peg.2042;DNA-binding protein HU-beta	2.29245		Non coding	0.945872
peg.1105;hypothetical protein	2.29053		Non coding	0.944649
peg.1529;tRNA-i(6)A37 methylthiotransferase	2.28305		Non coding	0.943695
peg.1342;hypothetical protein	2.27006		Non coding	0.939362
peg.2871;Translation elongation factor G	2.24833		Non coding	0.939301
peg.2364;Glutaredoxin-related protein	2.24682		Non coding	0.937092
peg.2890;Transcription antitermination protein NusG	2.23507		Non coding	0.936461
peg.2102;conserved hypothetical protein with 2 CBS domains	2.22452		Non coding	0.935033
peg.2039;ATP-dependent Clp protease proteolytic subunit (EC 3.4.21.92);Ontology_term=KEGG_ENZYME:3.4.21.92	2.22129		Non coding	0.929463
peg.2961;hypothetical protein	2.21745		Non coding	0.926279
peg.1836;two component response regulator	2.21094		Non coding	0.924602
peg.2845;SSU ribosomal protein S11p (S14e)	2.20591		Non coding	0.923763
peg.336;LSU ribosomal protein L28p	2.19519		Non coding	0.920846
peg.3242;NADH-ubiquinone oxidoreductase chain N (EC 1.6.5.3);Ontology_term=KEGG_ENZYME:1.6.5.3	2.1859		Non coding	0.914874
peg.2889;LSU ribosomal protein L11p (L12e)	2.18314		Non coding	0.913531
rna.34;tRNA-Pro-CGG	2.17995		Non coding	0.911207
peg.1942;Preprotein translocase subunit YajC (TC 3.A.5.1.1)	2.1796		Non coding	0.908655
peg.1923;hypothetical protein	2.16905		Non coding	0.908397
peg.3499;Permeases of the major facilitator superfamily	2.16855		Non coding	0.907283
peg.2079;hypothetical protein	2.15595		Non coding	0.907188
peg.2377;hypothetical protein	2.14095		Non coding	0.906587
peg.1593;Cytochrome c oxidase subunit CcoO (EC 1.9.3.1);Ontology_term=KEGG_ENZYME:1.9.3.1	2.13903		Non coding	0.905051
peg.1312;Octaprenyl-diphosphate synthase (EC 2.5.1.-) / Dimethylallyltransferase (EC 2.5.1.1) / Geranyltranstransferase (farnesyldiphosphate synthase) (EC 2.5.1.10) / Geranylgeranyl pyrophosphate synthetase (EC 2.5.1.29);Ontology_term=KEGG_ENZYME:2.5.1.-,KEGG_ENZYME:2.5.1.1,KEGG_ENZYME:2.5.1.10,KEGG_ENZYME:2.5.1.29	2.12775		Non coding	0.904017
peg.2328;hypothetical protein	2.11979		Non coding	0.903831
peg.267;Polyhydroxyalkanoic acid synthase	2.11524		Non coding	0.899447
peg.2888;LSU ribosomal protein L1p (L10Ae)	2.11419		Non coding	0.898672
peg.2994;LSU ribosomal protein L13p (L13Ae)	2.10422		Non coding	0.895764
peg.1456;CobW GTPase involved in cobalt insertion for B12 biosynthesis	2.09935		Non coding	0.895429
peg.3483;hypothetical protein	2.09816		Non coding	0.895161
peg.3112;FIG00451076: hypothetical protein	2.09359		Non coding	0.892481
peg.2056;Chemotaxis protein CheV (EC 2.7.3.-);Ontology_term=KEGG_ENZYME:2.7.3.-	2.09168		Non coding	0.89215
peg.2001;hypothetical protein	2.09118		Non coding	0.891133
peg.485;hypothetical protein	2.09108		Non coding	0.886684
peg.1718;hypothetical protein	2.07787		Non coding	0.885561
peg.3500;Integration host factor beta subunit	2.07569		Non coding	0.884603
peg.2708;conserved hypothetical protein	2.07223		Non coding	0.883294
peg.1691;NADPH-dependent glyceraldehyde-3-phosphate dehydrogenase (EC 1.2.1.13) / NAD-dependent glyceraldehyde-3-phosphate dehydrogenase (EC 1.2.1.12);Ontology_term=KEGG_ENZYME:1.2.1.13,KEGG_ENZYME:1.2.1.12	2.06411		Non coding	0.880293
peg.499;Electron transfer flavoprotein2C alpha subunit	2.06176		Non coding	0.879249
peg.2496;hypothetical protein	2.05898		Non coding	0.876602
peg.1323;Nucleoside diphosphate kinase (EC 2.7.4.6);Ontology_term=KEGG_ENZYME:2.7.4.6	2.05555		Non coding	0.876161
peg.2230;RNA-binding protein Hfq	2.05024		Non coding	0.873026
peg.824;Flagellar basal-body rod protein FlgC	2.04859		Non coding	0.870984
peg.1443;COG0500: SAM-dependent methyltransferases	2.04163		Non coding	0.870642
peg.487;ATP synthase beta chain (EC 3.6.3.14);Ontology_term=KEGG_ENZYME:3.6.3.14	2.04033		Non coding	0.868585
peg.1761;hypothetical protein	2.03921		Non coding	0.867665
peg.340;4Fe-4S ferredoxin2C iron-sulfur binding	2.03392		Non coding	0.861056
peg.2238;Outer membrane protein Imp2C required for envelope biogenesis / Organic solvent tolerance protein precursor	2.0336		Non coding	0.860157
peg.1359;hypothetical protein	2.03095		Non coding	0.859199
peg.500;3-hydroxybutyryl-CoA dehydrogenase (EC 1.1.1.157);Ontology_term=KEGG_ENZYME:1.1.1.157	2.02516		Non coding	0.857573
peg.178;DNA polymerase III beta subunit (EC 2.7.7.7);Ontology_term=KEGG_ENZYME:2.7.7.7	2.0243		Non coding	0.852322
peg.454;hypothetical protein	2.02092		Non coding	0.851754
peg.2077;hypothetical protein	2.01111		Non coding	0.850685
peg.145;Dna binding response regulator PrrA (RegA)	2.00966		Non coding	0.846934
peg.67;Histidinol dehydrogenase (EC 1.1.1.23);Ontology_term=KEGG_ENZYME:1.1.1.23	2.00319		Non coding	0.846327
peg.3007;hypothetical protein	2.00079		Non coding	0.84539
peg.270;Assimilatory nitrate reductase large subunit (EC:1.7.99.4);Ontology_term=KEGG_ENZYME:1.7.99.4	1.98838		Non coding	0.84396
peg.2995;SSU ribosomal protein S9p (S16e)	1.98697		Non coding	0.839819
peg.2946;hypothetical protein	1.98156		Non coding	0.839773
peg.823;Flagellar basal-body rod protein FlgB	1.97911		Non coding	0.834972
peg.2327;3-oxoacyl-[acyl-carrier-protein] synthase2C KASII (EC 2.3.1.41);Ontology_term=KEGG_ENZYME:2.3.1.41	1.97904		Non coding	0.832543
peg.1605;Molybdenum ABC transporter2C periplasmic molybdenum-binding protein ModA (TC 3.A.1.8.1)	1.97586		Non coding	0.830009
peg.2850;LSU ribosomal protein L30p (L7e)	1.9696		Non coding	0.827988
peg.1483;hypothetical protein	1.96906		Non coding	0.826917
peg.210;hypothetical protein	1.96453		Non coding	0.825581
peg.1514;Ubiquinone/menaquinone biosynthesis methyltransferase UbiE (EC 2.1.1.-) @ 2-heptaprenyl-12C4-naphthoquinone methyltransferase (EC 2.1.1.163);Ontology_term=KEGG_ENZYME:2.1.1.-,KEGG_ENZYME:2.1.1.163	1.96286		Non coding	0.825578
peg.2395;hypothetical protein	1.96017		Non coding	0.820672
peg.1710;hypothetical protein	1.95626		Non coding	0.818158
peg.2407;C4-type zinc finger protein2C DksA/TraR family	1.94962		Non coding	0.816309
peg.1876;NADH:ubiquinone oxidoreductase 17.2 kD subunit	1.94425		Non coding	0.812074
peg.2216;hypothetical protein	1.94104		Non coding	0.81146
peg.1262;hypothetical protein	1.93596		Non coding	0.811137
peg.759;Methylenetetrahydrofolate dehydrogenase (NADP+) (EC 1.5.1.5) / Methenyltetrahydrofolate cyclohydrolase (EC 3.5.4.9);Ontology_term=KEGG_ENZYME:1.5.1.5,KEGG_ENZYME:3.5.4.9	1.92892		Non coding	0.798761
peg.2040;ATP-dependent Clp protease ATP-binding subunit ClpX	1.9285		Non coding	0.798107
peg.2515;HtrA protease/chaperone protein	1.927		Non coding	0.797885
peg.632;PTS IIA-like nitrogen-regulatory protein PtsN	1.92696		Non coding	0.797207
peg.2816;hypothetical protein	1.92443		Non coding	0.794563
peg.1125;putative exported protein of unknown function	1.91838		Non coding	0.792613
peg.2599;Choline-sulfatase (EC 3.1.6.6);Ontology_term=KEGG_ENZYME:3.1.6.6	1.91489		Non coding	0.790156
peg.3348;Hydrolase	1.91081		Non coding	0.789733
peg.1922;Dihydroxy-acid dehydratase (EC 4.2.1.9);Ontology_term=KEGG_ENZYME:4.2.1.9	1.90805		Non coding	0.788027
peg.2959;MxaH	1.90344		Non coding	0.787725
peg.1902;hypothetical protein	1.90142		Non coding	0.787647
peg.39;hypothetical protein	1.89778		Non coding	0.785931
peg.3135;hypothetical protein	1.89238		Non coding	0.785409
peg.3056;ATPase	1.89082		Non coding	0.781736
peg.305;hypothetical protein	1.88494		Non coding	0.776486
peg.2285;3-oxoacyl-[acyl-carrier-protein] synthase2C KASII (EC 2.3.1.41);Ontology_term=KEGG_ENZYME:2.3.1.41	1.88046		Non coding	0.776188
peg.3211;Succinyl-CoA ligase [ADP-forming] alpha chain (EC 6.2.1.5);Ontology_term=KEGG_ENZYME:6.2.1.5	1.87568		Non coding	0.773688
peg.1482;hypothetical protein	1.87405		Non coding	0.772249
peg.1670;small integral membrane protein	1.87176		Non coding	0.77197
peg.1283;D-3-phosphoglycerate dehydrogenase (EC 1.1.1.95);Ontology_term=KEGG_ENZYME:1.1.1.95	1.87091		Non coding	0.768952
peg.2776;SSU ribosomal protein S2p (SAe)	1.87032		Non coding	0.765226
peg.160;Phosphoribosylformimino-5-aminoimidazole carboxamide ribotide isomerase (EC 5.3.1.16);Ontology_term=KEGG_ENZYME:5.3.1.16	1.86737		Non coding	0.764791
peg.185;3-oxoacyl-[acyl-carrier-protein] synthase2C KASI (EC 2.3.1.41);Ontology_term=KEGG_ENZYME:2.3.1.41	1.866		Non coding	0.763121
peg.2351;Phosphoribosylformylglycinamidine synthase2C PurS subunit (EC 6.3.5.3);Ontology_term=KEGG_ENZYME:6.3.5.3	1.8559		Non coding	0.762599
peg.2957;Methanol dehydrogenase large subunit protein (EC 1.1.99.8);Ontology_term=KEGG_ENZYME:1.1.99.8	1.85243		Non coding	0.762133
peg.833;Flagellin protein FlaA	1.84806		Non coding	0.761102
peg.1093;fimbriae associated protein	1.84536		Non coding	0.757301
peg.1674;Preprotein translocase subunit SecG (TC 3.A.5.1.1)	1.83547		Non coding	0.754668
peg.1441;Vitamin B12 ABC transporter2C B12-binding component BtuF	1.83188		Non coding	0.752547
peg.417;SSU ribosomal protein S16p	1.83179		Non coding	0.750127
peg.3313;Iojap protein	1.82886		Non coding	0.748388
peg.3324;Cell division protein FtsZ (EC 3.4.24.-);Ontology_term=KEGG_ENZYME:3.4.24.-	1.82791		Non coding	0.742494
peg.834;Flagellin protein FlaA	1.82745		Non coding	0.741091
peg.427;hypothetical protein	1.82705		Non coding	0.741048
peg.102;Chemotaxis regulator - transmits chemoreceptor signals to flagelllar motor components CheY	1.82686		Non coding	0.740067
peg.1711;Outer membrane lipoprotein omp16 precursor	1.82588		Non coding	0.737805
peg.3006;hypothetical protein	1.82498		Non coding	0.736889
peg.1930;Bll4755 protein	1.82365		Non coding	0.733737
peg.1842;hypothetical protein	1.82232		Non coding	0.73265
peg.1894;hypothetical protein	1.81663		Non coding	0.732417
peg.3243;NADH-ubiquinone oxidoreductase chain M (EC 1.6.5.3);Ontology_term=KEGG_ENZYME:1.6.5.3	1.81383		Non coding	0.726532
peg.66;FIG00993497: hypothetical protein	1.81381		Non coding	0.724276
peg.2953;Methanol dehydrogenase regulatory protein MoxR	1.81157		Non coding	0.723907
peg.826;Flagellar basal-body rod protein FlgG	1.81086		Non coding	0.720589
peg.1928;hypothetical protein	1.80934		Non coding	0.717554
peg.2591;Hydrogen peroxide-inducible genes activator	1.79781		Non coding	0.717365
peg.1280;hypothetical protein	1.79581		Non coding	0.712413
peg.205;Propionyl-CoA carboxylase carboxyl transferase subunit (EC 6.4.1.3);Ontology_term=KEGG_ENZYME:6.4.1.3	1.79529		Non coding	0.712261
peg.2454;hypothetical protein	1.79427		Non coding	0.711304
peg.1499;NnrS protein involved in response to NO	1.79319		Non coding	0.707973
peg.2656;FIG007785: exported protein	1.78834		Non coding	0.707449
peg.1343;Lysine exporter protein (LYSE/YGGA)	1.78591		Non coding	0.706442
peg.3075;PseudoReconstitué Aquaporin Z	1.7847		Non coding	0.702707
rna.35;tRNA-Gln-TTG	1.77932		Non coding	0.701388
peg.401;Phosphoglycerate mutase (EC 5.4.2.1);Ontology_term=KEGG_ENZYME:5.4.2.1	1.77878		Non coding	0.700699
peg.2011;hypothetical protein	1.77413		Non coding	0.698464
peg.3398;hypothetical protein	1.77068		Non coding	0.696993
peg.3013;conserved hypothetical protein%3B possible enterotoxin/cell wall-binding protein	1.76654		Non coding	0.694473
peg.2777;Translation elongation factor Ts	1.76528		Non coding	0.69167
peg.3325;Cell division protein FtsA	1.76237		Non coding	0.689007
peg.1495;3-polyprenyl-4-hydroxybenzoate carboxy-lyase (EC 4.1.1.-);Ontology_term=KEGG_ENZYME:4.1.1.-	1.75951		Non coding	0.685865
peg.3505;hypothetical protein	1.75623		Non coding	0.682895
peg.152;hypothetical protein	1.751		Non coding	0.677617
peg.2134;RNA polymerase sigma factor RpoD	1.74804		Non coding	0.677274
peg.3260;hypothetical protein	1.7395		Non coding	0.677195
peg.32;hypothetical protein	1.73948		Non coding	0.676246
peg.1191;conserved hypothetical signal peptide protein	1.73852		Non coding	0.675812
peg.468;Succinyl-CoA ligase [ADP-forming] alpha chain (EC 6.2.1.5);Ontology_term=KEGG_ENZYME:6.2.1.5	1.73835		Non coding	0.6757
peg.1302;Ribonuclease HII (EC 3.1.26.4);Ontology_term=KEGG_ENZYME:3.1.26.4	1.73291		Non coding	0.674507
peg.2847;Adenylate kinase (EC 2.7.4.3);Ontology_term=KEGG_ENZYME:2.7.4.3	1.73276		Non coding	0.674217
peg.462;Succinate dehydrogenase iron-sulfur protein (EC 1.3.99.1);Ontology_term=KEGG_ENZYME:1.3.99.1	1.72161		Non coding	0.672185
peg.1072;membrane c-type cytochrome cy	1.72132		Non coding	0.671711
peg.1917;hypothetical protein	1.72035		Non coding	0.671264
peg.15;hypothetical protein	1.71712		Non coding	0.668322
peg.1576;hypothetical protein	1.71468		Non coding	0.666256
peg.1708;hypothetical protein	1.71448		Non coding	0.661528
peg.2947;MxaD protein	1.71322		Non coding	0.658652
peg.1677;hypothetical protein	1.71254		Non coding	0.658309
peg.68;FIG00450379: hypothetical protein	1.71246		Non coding	0.658085
peg.3241;hypothetical protein	1.71077		Non coding	0.656321
peg.2952;hypothetical protein	1.71001		Non coding	0.65408
peg.3218;hypothetical protein	1.70724		Non coding	0.654067
peg.1517;ErfK/YbiS/YcfS/YnhG	1.70588		Non coding	0.648131
peg.88;O-antigen export system permease protein RfbD	1.70367		Non coding	0.647482
peg.1726;Rare lipoprotein A	1.70334		Non coding	0.643314
peg.367;hypothetical protein	1.7016		Non coding	0.640306
peg.1540;Translation initiation factor 2	1.69727		Non coding	0.639233
peg.1369;CDP-diacylglycerol--glycerol-3-phosphate 3-phosphatidyltransferase (EC 2.7.8.5);Ontology_term=KEGG_ENZYME:2.7.8.5	1.69387		Non coding	0.637656
peg.3531;Methylsuccinyl-CoA dehydrogenase2C predicted by (Erb et al2C 2007)	1.68996		Non coding	0.63513
peg.3535;Ethylmalonyl-CoA mutase2C methylsuccinyl-CoA-forming	1.68917		Non coding	0.63183
peg.2294;LSU ribosomal protein L9p	1.68597		Non coding	0.631126
peg.793;Orotidine 5'-phosphate decarboxylase (EC 4.1.1.23);Ontology_term=KEGG_ENZYME:4.1.1.23	1.68529		Non coding	0.629003
peg.447;hypothetical protein	1.68019		Non coding	0.625899
peg.3397;hypothetical protein	1.67375		Non coding	0.624996
peg.3322;competence lipoprotein ComL2C putative	1.67299		Non coding	0.622962
peg.645;8-amino-7-oxononanoate synthase (EC 2.3.1.47);Ontology_term=KEGG_ENZYME:2.3.1.47	1.66864		Non coding	0.618007
peg.2168;hypothetical protein	1.66484		Non coding	0.616564
peg.2779;hypothetical protein	1.66476		Non coding	0.616443
peg.3443;Pyrophosphate-energized proton pump (EC 3.6.1.1);Ontology_term=KEGG_ENZYME:3.6.1.1	1.6633		Non coding	0.616282
peg.2866;LSU ribosomal protein L23p (L23Ae)	1.65925		Non coding	0.61466
peg.2739;hypothetical protein	1.65395		Non coding	0.613288
peg.1279;PseudoReconstitué MotA/TolQ/ExbB proton channel family protein	1.64939		Non coding	0.610688
peg.187;Iron-responsive regulator Irr	1.64818		Non coding	0.609618
peg.3114;Pyruvate kinase (EC 2.7.1.40);Ontology_term=KEGG_ENZYME:2.7.1.40	1.64705		Non coding	0.609165
peg.2498;5-methyltetrahydrofolate--homocysteine methyltransferase (EC 2.1.1.13);Ontology_term=KEGG_ENZYME:2.1.1.13	1.64528		Non coding	0.607105
peg.3346;Salicylate hydroxylase (EC 1.14.13.1);Ontology_term=KEGG_ENZYME:1.14.13.1	1.64339		Non coding	0.605659
rna.40;tRNA-Val-CAC	1.64228		Non coding	0.605123
peg.1060;27kDa outer membrane protein	1.64224		Non coding	0.604462
peg.1316;Glycyl-tRNA synthetase alpha chain (EC 6.1.1.14);Ontology_term=KEGG_ENZYME:6.1.1.14	1.64094		Non coding	0.604363
peg.1090;Flp pilus assembly protein RcpC/CpaB	1.63823		Non coding	0.603443
peg.475;Histone-like DNA-binding protein	1.6381		Non coding	0.603288
peg.180;Rhodanese-related sulfurtransferase	1.63745		Non coding	0.602607
peg.2869;SSU ribosomal protein S10p (S20e)	1.63473		Non coding	0.602351
peg.800;Flagellar hook protein FlgE	1.63279		Non coding	0.601201
peg.2996;Integral membrane protein TerC family	1.63152		Non coding	0.59831
peg.653;Serine--glyoxylate aminotransferase (EC 2.6.1.45);Ontology_term=KEGG_ENZYME:2.6.1.45	1.63081		Non coding	0.593836
peg.2707;hypothetical protein	1.62737		Non coding	0.589486
peg.3084;hypothetical protein	1.62504		Non coding	0.585962
peg.2740;Acetolactate synthase small subunit (EC 2.2.1.6);Ontology_term=KEGG_ENZYME:2.2.1.6	1.62375		Non coding	0.582518
peg.3194;PseudoReconstitué HflC protein	1.62364		Non coding	0.582495
peg.2999;conserved hypothetical protein	1.6227		Non coding	0.580624
peg.1461;Vitamin B12 ABC transporter2C permease component BtuC	1.62074		Non coding	0.579374
peg.701;hypothetical protein	1.61893		Non coding	0.575667
peg.2091;Invasion protein B2C involved in pathogenesis	1.61789		Non coding	0.5748
peg.3076;ATP-dependent RNA helicase Atu1833	1.61427		Non coding	0.574418
peg.341;CarD-like transcriptional regulator	1.61277		Non coding	0.573739
peg.1955;hypothetical protein	1.6125		Non coding	0.570888
peg.43;ABC transporter2C ATP-binding protein	1.61224		Non coding	0.568808
peg.2586;NAD-dependent formate dehydrogenase delta subunit	1.61118		Non coding	0.568137
peg.1831;tRNA-specific 2-thiouridylase MnmA	1.60845		Non coding	0.566449
peg.1106;Signal recognition particle GTPase	1.60241		Non coding	0.565992
peg.1596;Type cbb3 cytochrome oxidase biogenesis protein CcoG2C involved in Cu oxidation	1.60145		Non coding	0.565017
peg.851;ErfK/YbiS/YcfS/YnhG	1.60039		Non coding	0.563093
peg.1526;TsaB protein2C required for threonylcarbamoyladenosine (t(6)A) formation in tRNA	1.59933		Non coding	0.561946
peg.758;hypothetical protein	1.59712		Non coding	0.560236
peg.2337;Glutamate synthase [NADPH] large chain (EC 1.4.1.13);Ontology_term=KEGG_ENZYME:1.4.1.13	1.58964		Non coding	0.559524
peg.2299;Amidophosphoribosyltransferase (EC 2.4.2.14);Ontology_term=KEGG_ENZYME:2.4.2.14	1.58836		Non coding	0.558169
peg.1530;Phosphate starvation-inducible protein PhoH2C predicted ATPase	1.58693		Non coding	0.556128
peg.3159;Dihydrodipicolinate synthase (EC 4.2.1.52);Ontology_term=KEGG_ENZYME:4.2.1.52	1.58608		Non coding	0.554683
peg.3245;NADH-ubiquinone oxidoreductase chain K (EC 1.6.5.3);Ontology_term=KEGG_ENZYME:1.6.5.3	1.58602		Non coding	0.554382
peg.3193;HflK protein	1.58329		Non coding	0.553428
peg.2848;Preprotein translocase secY subunit (TC 3.A.5.1.1)	1.58222		Non coding	0.551994
peg.3203;Large-conductance mechanosensitive channel	1.5811		Non coding	0.551093
peg.2585;putative copper binding protein	1.57966		Non coding	0.549843
peg.2021;transcriptional regulator2C Crp/Fnr family	1.57619		Non coding	0.549509
peg.1950;FIG00480696: hypothetical protein	1.5755		Non coding	0.547894
peg.806;Flagellar basal-body rod modification protein FlgD	1.57501		Non coding	0.541637
peg.486;Organic hydroperoxide resistance protein	1.57487		Non coding	0.54144
peg.3124;Glutamate synthase [NADPH] small chain (EC 1.4.1.13);Ontology_term=KEGG_ENZYME:1.4.1.13	1.56883		Non coding	0.541407
peg.2854;SSU ribosomal protein S8p (S15Ae)	1.56833		Non coding	0.540735
peg.2243;Ferredoxin2C 2Fe-2S	1.56678		Non coding	0.536441
peg.1545;Polyribonucleotide nucleotidyltransferase (EC 2.7.7.8);Ontology_term=KEGG_ENZYME:2.7.7.8	1.5666		Non coding	0.535569
peg.2018;hypothetical protein	1.55824		Non coding	0.533559
peg.131;probable exported protein STY0357	1.55022		Non coding	0.533111
peg.3133;hypothetical protein	1.54756		Non coding	0.532683
peg.1915;Protein-L-isoaspartate O-methyltransferase (EC 2.1.1.77);Ontology_term=KEGG_ENZYME:2.1.1.77	1.54048		Non coding	0.53261
peg.377;DNA polymerase III epsilon subunit (EC 2.7.7.7);Ontology_term=KEGG_ENZYME:2.7.7.7	1.54047		Non coding	0.530673
peg.2487;Inosine-5'-monophosphate dehydrogenase (EC 1.1.1.205);Ontology_term=KEGG_ENZYME:1.1.1.205	1.53945		Non coding	0.530308
peg.1843;hypothetical protein	1.53882		Non coding	0.529766
peg.1507;hypothetical protein	1.53828		Non coding	0.529219
peg.1856;hypothetical protein	1.5346		Non coding	0.528638
peg.1863;cytochrome c2C class II	1.53437		Non coding	0.527384
peg.1577;Transcriptional regulator2C TetR family	1.53003		Non coding	0.524159
peg.773;hypothetical protein	1.5297		Non coding	0.524011
peg.197;hypothetical protein	1.52967		Non coding	0.523377
peg.3226;hypothetical protein	1.52961		Non coding	0.5231
peg.1594;hypothetical protein	1.5295		Non coding	0.522548
peg.165;Imidazole glycerol phosphate synthase amidotransferase subunit (EC 2.4.2.-);Ontology_term=KEGG_ENZYME:2.4.2.-	1.52787		Non coding	0.517551
peg.3258;Carboxynorspermidine dehydrogenase2C putative (EC 1.1.1.-);Ontology_term=KEGG_ENZYME:1.1.1.-	1.52629		Non coding	0.516173
peg.455;hypothetical protein	1.52013		Non coding	0.516164
peg.2938;Response regulator	1.51909		Non coding	0.516055
peg.2092;Hemimethylated DNA-binding region	1.51865		Non coding	0.515912
peg.3113;Predicted integral membrane protein	1.51728		Non coding	0.512135
peg.2650;hypothetical protein	1.51659		Non coding	0.509957
peg.2787;hypothetical protein	1.51442		Non coding	0.509733
peg.2101;hypothetical protein	1.51434		Non coding	0.508053
peg.1744;PseudoReconstitué Outer membrane lipoprotein carrier protein LolA	1.514		Non coding	0.508034
peg.2349;FIG040666: hypothetical protein perhaps implicated in de Novo purine biosynthesis	1.50993		Non coding	0.507784
peg.3212;Phosphoenolpyruvate carboxylase (EC 4.1.1.31)%3B divergent?;Ontology_term=KEGG_ENZYME:4.1.1.31	1.50663		Non coding	0.50719
peg.1597;Type cbb3 cytochrome oxidase biogenesis protein CcoH	1.50297		Non coding	0.506801
peg.3063;hypothetical protein	1.49939		Non coding	0.505259
peg.1590;Universal stress protein UspA and related nucleotide-binding protein	1.49735		Non coding	0.504063
peg.2173;Lipid A export ATP-binding/permease protein MsbA (EC 3.6.3.25);Ontology_term=KEGG_ENZYME:3.6.3.25	1.49676		Non coding	0.502656
peg.7;Adenosylhomocysteinase (EC 3.3.1.1);Ontology_term=KEGG_ENZYME:3.3.1.1	1.49585		Non coding	0.501874
peg.2695;ABC transporter2C ATP-binding protein	1.48563		Non coding	0.50176
peg.3169;CheY protein	1.4833		Non coding	0.50143
peg.143;Cytochrome oxidase biogenesis protein Sco1/SenC/PrrC2C putative copper metallochaperone	1.48016		Non coding	0.500573
peg.807;Flagellar biosynthesis protein FliQ	1.47549		Non coding	0.500332
peg.1310;4-diphosphocytidyl-2-C-methyl-D-erythritol kinase (EC 2.7.1.148);Ontology_term=KEGG_ENZYME:2.7.1.148	1.47439		Non coding	0.499695
peg.2024;Peptidyl-prolyl cis-trans isomerase (EC 5.2.1.8);Ontology_term=KEGG_ENZYME:5.2.1.8	1.47403		Non coding	0.498966
peg.6;Putative metal chaperone2C involved in Zn homeostasis2C GTPase of COG0523 family	1.47348		Non coding	0.497644
peg.846;Positive regulator of CheA protein activity (CheW)	1.47223		Non coding	0.49745
peg.3126;Cold-shock protein2C DNA-binding	1.47194		Non coding	0.496869
peg.1508;Catalase (EC 1.11.1.6);Ontology_term=KEGG_ENZYME:1.11.1.6	1.4718		Non coding	0.495797
peg.2034;Thiosulfate sulfurtransferase2C rhodanese (EC 2.8.1.1);Ontology_term=KEGG_ENZYME:2.8.1.1	1.47104		Non coding	0.492919
peg.844;Chemotaxis protein methyltransferase CheR (EC 2.1.1.80);Ontology_term=KEGG_ENZYME:2.1.1.80	1.46856		Non coding	0.49283
rna.49;tRNA-Pro-GGG	1.46804		Non coding	0.492545
peg.1537;COG0779: clustered with transcription termination protein NusA	1.46536		Non coding	0.491901
peg.2849;LSU ribosomal protein L15p (L27Ae)	1.46519		Non coding	0.4908
peg.2896;FIG00450134: hypothetical protein	1.464		Non coding	0.490625
peg.1659;Enoyl-[acyl-carrier-protein] reductase [NADH] (EC 1.3.1.9);Ontology_term=KEGG_ENZYME:1.3.1.9	1.46319		Non coding	0.490495
peg.1050;Peptide chain release factor 2%3B programmed frameshift-containing	1.4625		Non coding	0.489588
peg.1278;Biopolymer transport protein ExbD/TolR	1.46188		Non coding	0.486693
peg.1103;hypothetical protein	1.45827		Non coding	0.486173
peg.428;hypothetical protein	1.45736		Non coding	0.486022
peg.3168;Signal transduction histidine kinase	1.45693		Non coding	0.480753
peg.1865;Translation elongation factor G-related protein	1.45691		Non coding	0.47956
peg.461;Phosphate ABC transporter2C periplasmic phosphate-binding protein PstS (TC 3.A.1.7.1)	1.45598		Non coding	0.478742
peg.3064;D-alanyl-D-alanine carboxypeptidase (EC 3.4.16.4);Ontology_term=KEGG_ENZYME:3.4.16.4	1.455		Non coding	0.47796
peg.2287;3-oxoacyl-[acyl-carrier protein] reductase (EC 1.1.1.100);Ontology_term=KEGG_ENZYME:1.1.1.100	1.45434		Non coding	0.4751
peg.2136;DNA primase (EC 2.7.7.-);Ontology_term=KEGG_ENZYME:2.7.7.-	1.45094		Non coding	0.472494
peg.3548;Zinc metalloprotease (EC 3.4.24.-);Ontology_term=KEGG_ENZYME:3.4.24.-	1.44967		Non coding	0.47176
peg.606;Mll3781 protein	1.44728		Non coding	0.47103
peg.142;hypothetical protein	1.44455		Non coding	0.468778
peg.2459;Sensor histidine kinase	1.44432		Non coding	0.468402
peg.1325;hypothetical protein	1.44323		Non coding	0.468291
peg.3257;hypothetical protein	1.44303		Non coding	0.467174
peg.3310;chemotaxis protein CheYII	1.44249		Non coding	0.46661
peg.189;PseudoReconstitué Glyoxylate reductase (EC 1.1.1.79) / Glyoxylate reductase (EC 1.1.1.26) / Hydroxypyruvate reductase (EC 1.1.1.81);Ontology_term=KEGG_ENZYME:1.1.1.79,KEGG_ENZYME:1.1.1.26,KEGG_ENZYME:1.1.1.81	1.44165		Non coding	0.465826
peg.3087;Integral membrane protein CcmA involved in cell shape determination	1.44127		Non coding	0.463742
peg.2751;Translation elongation factor P	1.4343		Non coding	0.46071
peg.204;hypothetical protein	1.4316		Non coding	0.460671
peg.1684;hypothetical protein	1.4311		Non coding	0.459144
peg.2499;hypothetical protein	1.42976		Non coding	0.456664
peg.1143;Methionine aminopeptidase (EC 3.4.11.18);Ontology_term=KEGG_ENZYME:3.4.11.18	1.42757		Non coding	0.455975
peg.617;Zinc uptake regulation protein ZUR	1.42637		Non coding	0.454679
peg.44;hypothetical protein	1.42457		Non coding	0.453765
peg.845;response regulator receiver domain protein (CheY-like)	1.42424		Non coding	0.452977
peg.1554;hypothetical protein	1.42174		Non coding	0.452946
peg.1309;FIG140336: TPR domain protein	1.41975		Non coding	0.45249
peg.1061;3-dehydroquinate dehydratase II (EC 4.2.1.10);Ontology_term=KEGG_ENZYME:4.2.1.10	1.41836		Non coding	0.449824
peg.2369;hypothetical protein	1.41807		Non coding	0.449107
peg.1815;hypothetical protein	1.4151		Non coding	0.448641
peg.803;Flagellar hook-associated protein FlgL	1.41394		Non coding	0.448334
peg.2367;hypothetical protein	1.41303		Non coding	0.447809
peg.3061;ATP-dependent Clp protease ATP-binding subunit ClpA	1.41203		Non coding	0.447598
peg.1715;Cell division protein FtsH (EC 3.4.24.-);Ontology_term=KEGG_ENZYME:3.4.24.-	1.41125		Non coding	0.445821
peg.1969;hypothetical protein	1.40989		Non coding	0.442209
peg.2133;hypothetical protein	1.40982		Non coding	0.440569
peg.794;protein of unknown function DUF1330	1.40943		Non coding	0.439658
peg.1757;Biotin carboxylase (EC 6.3.4.14) / Biotin carboxyl carrier protein;Ontology_term=KEGG_ENZYME:6.3.4.14	1.40872		Non coding	0.438231
peg.2868;LSU ribosomal protein L3p (L3e)	1.40707		Non coding	0.437783
peg.2253;Transketolase (EC 2.2.1.1);Ontology_term=KEGG_ENZYME:2.2.1.1	1.40553		Non coding	0.436781
peg.802;Flagellar hook-associated protein FlgK	1.40473		Non coding	0.436593
peg.1870;hypothetical protein	1.40143		Non coding	0.435925
peg.2082;hypothetical protein	1.40113		Non coding	0.435875
peg.1660;hypothetical protein	1.40089		Non coding	0.435302
peg.841;hypothetical protein	1.3987		Non coding	0.435072
peg.1059;Putative Zn-dependent protease2C contains TPR repeats	1.39796		Non coding	0.434657
peg.186;3-hydroxydecanoyl-[acyl-carrier-protein] dehydratase (EC 4.2.1.60);Ontology_term=KEGG_ENZYME:4.2.1.60	1.39777		Non coding	0.433522
peg.1587;hypothetical protein	1.39722		Non coding	0.433435
peg.1054;hypothetical protein	1.39683		Non coding	0.432349
peg.2041;ATP-dependent protease La (EC 3.4.21.53) Type I;Ontology_term=KEGG_ENZYME:3.4.21.53	1.39507		Non coding	0.431619
peg.1860;hypothetical protein	1.395		Non coding	0.43157
peg.2490;hypothetical protein	1.39307		Non coding	0.428698
peg.1877;FIG167255: hypothetical protein	1.39229		Non coding	0.427854
peg.2121;Isopropylmalate/homocitrate/citramalate synthases	1.39165		Non coding	0.427376
peg.1997;hypothetical protein	1.38912		Non coding	0.426213
peg.220;alginate regulatory protein AlgR3	1.38649		Non coding	0.425991
peg.2949;hypothetical protein	1.38345		Non coding	0.423931
peg.2326;hypothetical protein	1.38308		Non coding	0.423799
peg.1686;Fructose-bisphosphate aldolase class I (EC 4.1.2.13);Ontology_term=KEGG_ENZYME:4.1.2.13	1.38307		Non coding	0.423213
peg.4;Formaldehyde activating enzyme	1.38222		Non coding	0.422726
peg.2862;SSU ribosomal protein S3p (S3e)	1.3822		Non coding	0.41757
peg.2141;Carbamoyl-phosphate synthase large chain (EC 6.3.5.5);Ontology_term=KEGG_ENZYME:6.3.5.5	1.37524		Non coding	0.415858
peg.2363;YrbA protein	1.37286		Non coding	0.4158
peg.436;hypothetical protein	1.37196		Non coding	0.414366
peg.3109;Response regulatory protein	1.37181		Non coding	0.414193
peg.1948;ABC-type multidrug transport system2C ATPase and permease components	1.3716		Non coding	0.4126
peg.2851;SSU ribosomal protein S5p (S2e)	1.36785		Non coding	0.410586
peg.2083;Transporter	1.36473		Non coding	0.409904
rna.51;tRNA-Leu-CAA	1.36349		Non coding	0.409512
peg.1832;FIG00480737: hypothetical protein	1.36324		Non coding	0.409486
peg.1816;hypothetical protein	1.3602		Non coding	0.408286
peg.402;PseudoReconstitué Dihydrodipicolinate reductase (EC 1.3.1.26);Ontology_term=KEGG_ENZYME:1.3.1.26	1.35783		Non coding	0.405949
peg.2475;hypothetical protein	1.3554		Non coding	0.405595
peg.2307;hypothetical protein	1.35283		Non coding	0.404857
peg.579;Cell division transporter2C ATP-binding protein FtsE (TC 3.A.5.1.1)	1.35258		Non coding	0.402487
peg.2786;hypothetical protein	1.35174		Non coding	0.401718
peg.126;hypothetical protein	1.3516		Non coding	0.40155
peg.1038;Putative formate dehydrogenase oxidoreductase protein	1.35		Non coding	0.401189
rna.28;tRNA-Asn-GTT	1.34944		Non coding	0.401083
peg.1111;Cytochrome c oxidase polypeptide III (EC 1.9.3.1);Ontology_term=KEGG_ENZYME:1.9.3.1	1.34855		Non coding	0.400092
peg.384;Transcription termination factor Rho	1.34742		Non coding	0.398915
peg.433;hypothetical protein	1.3459		Non coding	0.397779
peg.1704;MotA/TolQ/ExbB proton channel family protein	1.34468		Non coding	0.397278
peg.1713;TPR repeat containing exported protein%3B Putative periplasmic protein contains a protein prenylyltransferase domain	1.3396		Non coding	0.397171
peg.2298;Colicin V production protein	1.3393		Non coding	0.39654
peg.1690;hypothetical protein	1.3352		Non coding	0.395972
peg.42;hypothetical protein	1.33443		Non coding	0.395867
peg.801;Flagellar hook protein FlgE	1.3306		Non coding	0.395022
peg.1432;Isoquinoline 1-oxidoreductase alpha subunit (EC 1.3.99.16);Ontology_term=KEGG_ENZYME:1.3.99.16	1.33021		Non coding	0.394348
peg.5;TonB-dependent hemin 2C ferrichrome receptor	1.32973		Non coding	0.393968
peg.2852;LSU ribosomal protein L18p (L5e)	1.32956		Non coding	0.392643
peg.2832;hypothetical protein	1.32938		Non coding	0.392152
peg.2793;hypothetical protein	1.32904		Non coding	0.391522
peg.3189;FIG01011804: hypothetical protein	1.32777		Non coding	0.390334
peg.3319;glyoxalase family protein	1.32683		Non coding	0.390131
peg.2569;hypothetical protein	1.32317		Non coding	0.39008
peg.3115;InterPro IPR001440 COGs COG0457	1.32317		Non coding	0.38981
peg.168;ATP-dependent protease HslV (EC 3.4.25.-);Ontology_term=KEGG_ENZYME:3.4.25.-	1.3231		Non coding	0.388694
peg.549;LSU ribosomal protein L34p	1.32229		Non coding	0.388046
peg.2239;hypothetical protein	1.31965		Non coding	0.385892
peg.2855;SSU ribosomal protein S14p (S29e)	1.31829		Non coding	0.384923
peg.3117;Response regulator	1.31789		Non coding	0.383522
peg.120;Aerobic cobaltochelatase CobS subunit (EC 6.6.1.2);Ontology_term=KEGG_ENZYME:6.6.1.2	1.31766		Non coding	0.383153
peg.1685;hypothetical protein	1.31602		Non coding	0.381825
peg.225;hypothetical protein	1.31562		Non coding	0.380685
peg.2348;Predicted esterase of the alpha/beta hydrolase fold	1.31558		Non coding	0.380331
peg.2870;Translation elongation factor Tu	1.31374		Non coding	0.380136
peg.1063;Biotin carboxylase of acetyl-CoA carboxylase (EC 6.3.4.14);Ontology_term=KEGG_ENZYME:6.3.4.14	1.31374		Non coding	0.379978
peg.3467;hypothetical protein	1.31038		Non coding	0.378279
peg.1043;Cytochrome O ubiquinol oxidase subunit II (EC 1.10.3.-);Ontology_term=KEGG_ENZYME:1.10.3.-	1.31017		Non coding	0.378074
peg.488;hypothetical protein	1.31003		Non coding	0.377467
peg.2179;hypothetical protein	1.30955		Non coding	0.377393
peg.789;Chaperone protein DnaK	1.30655		Non coding	0.376105
peg.1531;Metal-dependent hydrolase YbeY2C involved in rRNA and/or ribosome maturation and assembly	1.30566		Non coding	0.375181
peg.2718;hypothetical protein	1.30271		Non coding	0.374758
peg.3478;FIG00449860: hypothetical protein	1.30209		Non coding	0.373118
peg.466;Malate dehydrogenase (EC 1.1.1.37);Ontology_term=KEGG_ENZYME:1.1.1.37	1.3019		Non coding	0.373083
peg.2242;Thioredoxin reductase (EC 1.8.1.9);Ontology_term=KEGG_ENZYME:1.8.1.9	1.29764		Non coding	0.370702
peg.2934;outer membrane autotransporter barrel domain	1.29752		Non coding	0.370665
peg.2864;SSU ribosomal protein S19p (S15e)	1.29677		Non coding	0.369157
peg.1506;hypothetical protein	1.29535		Non coding	0.367372
peg.2267;SOS-response repressor and protease LexA (EC 3.4.21.88);Ontology_term=KEGG_ENZYME:3.4.21.88	1.29478		Non coding	0.366413
peg.2867;LSU ribosomal protein L4p (L1e)	1.29341		Non coding	0.365067
peg.2373;Isocitrate dehydrogenase [NADP] (EC 1.1.1.42);Ontology_term=KEGG_ENZYME:1.1.1.42	1.29223		Non coding	0.363342
peg.816;Flagellar basal-body rod protein FlgF	1.29063		Non coding	0.360767
peg.2300;3-oxoacyl-[acyl-carrier protein] reductase (EC 1.1.1.100);Ontology_term=KEGG_ENZYME:1.1.1.100	1.28944		Non coding	0.360094
peg.2235;Cytosol aminopeptidase PepA (EC 3.4.11.1);Ontology_term=KEGG_ENZYME:3.4.11.1	1.28901		Non coding	0.359957
peg.2072;Ribose 5-phosphate isomerase A (EC 5.3.1.6);Ontology_term=KEGG_ENZYME:5.3.1.6	1.28744		Non coding	0.358591
peg.1095;Protein export cytoplasm protein SecA ATPase RNA helicase (TC 3.A.5.1.1)	1.28709		Non coding	0.356976
peg.2068;DNA topoisomerase I (EC 5.99.1.2);Ontology_term=KEGG_ENZYME:5.99.1.2	1.2844		Non coding	0.356343
peg.2402;hypothetical protein	1.28378		Non coding	0.356219
peg.1890;32C4-dihydroxy-2-butanone 4-phosphate synthase (EC 4.1.99.12) / GTP cyclohydrolase II (EC 3.5.4.25);Ontology_term=KEGG_ENZYME:4.1.99.12,KEGG_ENZYME:3.5.4.25	1.28178		Non coding	0.355616
peg.662;hypothetical protein	1.28157		Non coding	0.355584
peg.2853;LSU ribosomal protein L6p (L9e)	1.28045		Non coding	0.355142
peg.263;RND efflux system2C membrane fusion protein CmeA	1.27944		Non coding	0.354815
peg.1611;Phosphohistidine phosphatase SixA	1.27866		Non coding	0.353393
peg.2883;2-keto-3-deoxy-D-arabino-heptulosonate-7-phosphate synthase II (EC 2.5.1.54);Ontology_term=KEGG_ENZYME:2.5.1.54	1.27862		Non coding	0.353346
peg.1073;hypothetical protein	1.27494		Non coding	0.349376
peg.1591;transcriptional regulatory protein	1.27447		Non coding	0.349109
peg.1484;transcriptional regulator2C Crp/Fnr family	1.27297		Non coding	0.348919
peg.1055;Cytoplasmic axial filament protein CafA and Ribonuclease G (EC 3.1.4.-);Ontology_term=KEGG_ENZYME:3.1.4.-	1.27255		Non coding	0.348088
peg.1049;Aldo/keto reductase precursor	1.27253		Non coding	0.347702
peg.1857;3-oxoacyl-[acyl-carrier protein] reductase (EC 1.1.1.100);Ontology_term=KEGG_ENZYME:1.1.1.100	1.27245		Non coding	0.347541
peg.369;hypothetical protein that often co-occurs with aconitase	1.27201		Non coding	0.346787
peg.1536;tRNA (guanine46-N7-)-methyltransferase (EC 2.1.1.33);Ontology_term=KEGG_ENZYME:2.1.1.33	1.27053		Non coding	0.345945
peg.651;Cysteine synthase (EC 2.5.1.47);Ontology_term=KEGG_ENZYME:2.5.1.47	1.26766		Non coding	0.345174
peg.1918;hypothetical protein	1.2673		Non coding	0.344531
peg.2505;hypothetical protein	1.2639		Non coding	0.343745
peg.3036;hypothetical protein	1.26241		Non coding	0.343691
peg.494;hypothetical protein	1.26121		Non coding	0.343613
peg.2172;Uncharacterized protein2C Bsl7517 homolog	1.26118		Non coding	0.343251
peg.2677;N(5)2CN(10)-methenyltetrahydromethanopterin cyclohydrolase (EC 3.5.4.27);Ontology_term=KEGG_ENZYME:3.5.4.27	1.26044		Non coding	0.342269
peg.3153;Mll7752 protein	1.25848		Non coding	0.342228
peg.3204;hypothetical protein	1.25829		Non coding	0.341809
peg.652;hypothetical protein	1.25656		Non coding	0.341354
peg.693;hypothetical protein	1.256		Non coding	0.341345
peg.493;Carboxyl-terminal protease (EC 3.4.21.102);Ontology_term=KEGG_ENZYME:3.4.21.102	1.25598		Non coding	0.340748
peg.3283;two-component response regulator	1.25585		Non coding	0.339846
peg.654;hypothetical protein	1.25382		Non coding	0.338678
peg.214;hypothetical protein	1.24907		Non coding	0.338088
peg.1882;Transcriptional regulator2C MarR family	1.24813		Non coding	0.337779
peg.1567;hypothetical protein	1.24773		Non coding	0.337345
peg.1595;Cytochrome c oxidase subunit CcoP (EC 1.9.3.1);Ontology_term=KEGG_ENZYME:1.9.3.1	1.24761		Non coding	0.337291
peg.2094;Intracellular PHB depolymerase	1.24683		Non coding	0.335744
peg.2997;N-acetyl-gamma-glutamyl-phosphate reductase (EC 1.2.1.38);Ontology_term=KEGG_ENZYME:1.2.1.38	1.24504		Non coding	0.335347
peg.2951;MxaA protein2C putative	1.24466		Non coding	0.335009
peg.2093;Malyl-CoA lyase (EC 4.1.3.24);Ontology_term=KEGG_ENZYME:4.1.3.24	1.24459		Non coding	0.334405
peg.375;Transporter	1.24452		Non coding	0.333487
peg.1929;xyppx repeat family protein	1.24382		Non coding	0.333395
peg.2791;(3R)-hydroxymyristoyl-[acyl carrier protein] dehydratase (EC 4.2.1.-);Ontology_term=KEGG_ENZYME:4.2.1.-	1.24312		Non coding	0.332916
peg.1124;4-hydroxy-3-methylbut-2-enyl diphosphate reductase (EC 1.17.1.2);Ontology_term=KEGG_ENZYME:1.17.1.2	1.24212		Non coding	0.332046
peg.2735;diguanylate cyclase/phosphodiesterase (GGDEF & EAL domains) with PAS/PAC sensor(s)	1.24102		Non coding	0.331109
peg.1861;Aspartate aminotransferase (EC 2.6.1.1);Ontology_term=KEGG_ENZYME:2.6.1.1	1.23974		Non coding	0.330923
peg.1803;Ferredoxin--NADP(+) reductase (EC 1.18.1.2);Ontology_term=KEGG_ENZYME:1.18.1.2	1.23754		Non coding	0.330334
peg.1656;hypothetical protein	1.23696		Non coding	0.329902
peg.2352;hypothetical protein	1.23693		Non coding	0.329094
peg.2023;Phosphopantetheine adenylyltransferase (EC 2.7.7.3);Ontology_term=KEGG_ENZYME:2.7.7.3	1.23598		Non coding	0.328624
peg.3339;hypothetical protein	1.23547		Non coding	0.328479
peg.1956;3-oxoacyl-[acyl-carrier protein] reductase (EC 1.1.1.100);Ontology_term=KEGG_ENZYME:1.1.1.100	1.23532		Non coding	0.326862
peg.2838;hypothetical protein	1.23425		Non coding	0.326285
peg.1299;serine/threonine protein phosphatase2C putative	1.23406		Non coding	0.325591
peg.678;Glyoxalase family protein	1.23311		Non coding	0.325225
peg.3202;hypothetical protein	1.23231		Non coding	0.324579
peg.2661;Sulfate adenylyltransferase subunit 1 (EC 2.7.7.4) / Adenylylsulfate kinase (EC 2.7.1.25);Ontology_term=KEGG_ENZYME:2.7.7.4,KEGG_ENZYME:2.7.1.25	1.23096		Non coding	0.32352
peg.1900;hypothetical protein	1.23063		Non coding	0.321362
peg.2993;hypothetical protein	1.23061		Non coding	0.3206
peg.1778;Aspartate aminotransferase (EC 2.6.1.1);Ontology_term=KEGG_ENZYME:2.6.1.1	1.22922		Non coding	0.319312
peg.1598;FUPA27 P-type ATPase	1.22774		Non coding	0.318286
peg.2521;Surface antigen	1.21939		Non coding	0.317716
peg.1527;Ribosomal-protein-S18p-alanine acetyltransferase (EC 2.3.1.-);Ontology_term=KEGG_ENZYME:2.3.1.-	1.21914		Non coding	0.317359
peg.1078;Oligopeptide transport system permease protein OppB (TC 3.A.1.5.1)	1.21739		Non coding	0.316038
peg.2856;LSU ribosomal protein L5p (L11e)	1.21706		Non coding	0.315665
peg.203;Cytochrome B561	1.21682		Non coding	0.31532
peg.1370;Molybdenum cofactor biosynthesis protein MoaD	1.21667		Non coding	0.31501
peg.1818;ABC transporter2C ATP-binding protein	1.21487		Non coding	0.314049
peg.2325;hypothetical protein	1.21474		Non coding	0.313337
peg.1838;hypothetical protein	1.21311		Non coding	0.312639
peg.569;NnrU family protein2C required for expression of nitric oxide and nitrite reductases (Nir and Nor)	1.2128		Non coding	0.311688
peg.1431;Isoquinoline 1-oxidoreductase beta subunit (EC 1.3.99.16);Ontology_term=KEGG_ENZYME:1.3.99.16	1.21224		Non coding	0.311429
peg.2865;LSU ribosomal protein L2p (L8e)	1.21218		Non coding	0.311321
peg.2780;Ribosome recycling factor	1.21065		Non coding	0.311009
peg.2686;conserved hypothetical protein	1.20907		Non coding	0.309003
peg.660;Ribonuclease E (EC 3.1.26.12);Ontology_term=KEGG_ENZYME:3.1.26.12	1.20777		Non coding	0.308748
peg.1154;3-isopropylmalate dehydratase small subunit (EC 4.2.1.33);Ontology_term=KEGG_ENZYME:4.2.1.33	1.20685		Non coding	0.308602
peg.3279;hypothetical protein	1.20631		Non coding	0.308249
peg.1270;hypothetical protein	1.20558		Non coding	0.308225
peg.1170;hypothetical protein	1.20555		Non coding	0.308002
peg.1845;hypothetical protein	1.20467		Non coding	0.307508
peg.1573;hypothetical protein	1.20073		Non coding	0.307431
peg.184;Enoyl-[acyl-carrier-protein] reductase [NADH] (EC 1.3.1.9);Ontology_term=KEGG_ENZYME:1.3.1.9	1.20045		Non coding	0.307169
peg.2345;Adenylosuccinate lyase (EC 4.3.2.2);Ontology_term=KEGG_ENZYME:4.3.2.2	1.20003		Non coding	0.306568
peg.71;hypothetical protein	1.19851		Non coding	0.305813
peg.414;hypothetical protein	1.19831		Non coding	0.305352
peg.1518;Zinc ABC transporter2C periplasmic-binding protein ZnuA	1.19773		Non coding	0.305039
peg.240;Acetyl-coenzyme A synthetase (EC 6.2.1.1);Ontology_term=KEGG_ENZYME:6.2.1.1	1.19761		Non coding	0.304941
peg.2799;hypothetical protein	1.19521		Non coding	0.303408
peg.1092;hypothetical protein	1.19487		Non coding	0.30314
peg.1244;TonB-dependent receptor	1.19383		Non coding	0.302856
peg.363;hypothetical protein	1.19297		Non coding	0.302492
peg.2885;DNA-directed RNA polymerase beta subunit (EC 2.7.7.6);Ontology_term=KEGG_ENZYME:2.7.7.6	1.19157		Non coding	0.302459
peg.1585;hypothetical protein	1.18921		Non coding	0.301626
peg.604;PhbF	1.18869		Non coding	0.301618
peg.594;hypothetical protein	1.1875		Non coding	0.300931
peg.3341;hypothetical protein	1.18508		Non coding	0.296681
peg.1062;Biotin carboxyl carrier protein of acetyl-CoA carboxylase	1.18445		Non coding	0.295653
peg.903;Undecaprenyl-phosphate galactosephosphotransferase (EC 2.7.8.6);Ontology_term=KEGG_ENZYME:2.7.8.6	1.18418		Non coding	0.295229
peg.1717;Phosphoglucosamine mutase (EC 5.4.2.10);Ontology_term=KEGG_ENZYME:5.4.2.10	1.18224		Non coding	0.295174
peg.1254;transcriptional regulator2C TetR family	1.18184		Non coding	0.294897
peg.804;flagellar protein FlaF	1.1818		Non coding	0.294585
peg.2504;hypothetical protein	1.18104		Non coding	0.293968
rna.24;tRNA-Leu-GAG	1.18064		Non coding	0.293463
peg.2043;hypothetical protein	1.18041		Non coding	0.293241
peg.2467;hypothetical protein	1.17943		Non coding	0.292419
peg.2245;hypothetical protein	1.17928		Non coding	0.292226
peg.557;Acetylglutamate kinase (EC 2.7.2.8);Ontology_term=KEGG_ENZYME:2.7.2.8	1.17923		Non coding	0.292144
peg.3373;DnaJ-like protein DjlA	1.17702		Non coding	0.291564
peg.2236;COG0795: Predicted permeases	1.17631		Non coding	0.291121
peg.1439;COG1120: ABC-type cobalamin/Fe3+-siderophores transport systems2C ATPase components	1.17471		Non coding	0.290721
peg.1322;hypothetical protein	1.17369		Non coding	0.290714
peg.2019;DNA gyrase subunit A (EC 5.99.1.3);Ontology_term=KEGG_ENZYME:5.99.1.3	1.17351		Non coding	0.290488
peg.3386;hypothetical protein	1.17312		Non coding	0.290332
peg.1669;Lipolytic enzyme2C G-D-S-L family precursor	1.17197		Non coding	0.290104
peg.1532;Magnesium and cobalt efflux protein CorC	1.16992		Non coding	0.289004
peg.3495;Acetyl-coenzyme A carboxyl transferase beta chain (EC 6.4.1.2);Ontology_term=KEGG_ENZYME:6.4.1.2	1.16833		Non coding	0.287719
peg.564;Outer membrane protein YfgL2C lipoprotein component of the protein assembly complex (forms a complex with YaeT2C YfiO2C and NlpB)	1.16759		Non coding	0.287447
peg.2193;PUTATIVE HYDROLASE PROTEIN	1.16708		Non coding	0.28694
peg.1944;Protein-export membrane protein SecF (TC 3.A.5.1.1)	1.16692		Non coding	0.286753
peg.3340;FIG00451333: hypothetical protein	1.16579		Non coding	0.286566
peg.2204;NADPH dependent preQ0 reductase (EC 1.7.1.13);Ontology_term=KEGG_ENZYME:1.7.1.13	1.16311		Non coding	0.286224
peg.1837;hypothetical protein	1.163		Non coding	0.285916
peg.3479;FIG018229: hypothetical protein	1.16122		Non coding	0.285741
peg.3290;hypothetical protein	1.15925		Non coding	0.285544
peg.571;Molybdenum cofactor biosynthesis protein MoaA	1.15911		Non coding	0.284382
rna.41;tRNA-Ser-TGA	1.15907		Non coding	0.284173
peg.1983;hypothetical protein	1.15899		Non coding	0.280737
peg.2122;histone protein	1.15825		Non coding	0.280685
peg.2492;carbonic anhydrase2C family 3	1.15699		Non coding	0.280529
peg.1294;hypothetical protein	1.15623		Non coding	0.280525
peg.798;hypothetical protein	1.15556		Non coding	0.280453
peg.1932;Segregation and condensation protein A	1.15432		Non coding	0.280011
peg.2820;FIG01163484: hypothetical protein	1.1511		Non coding	0.279928
peg.3062;ATP-dependent Clp protease adaptor protein ClpS	1.15062		Non coding	0.279811
peg.2863;LSU ribosomal protein L22p (L17e)	1.14829		Non coding	0.279544
peg.1683;thiamine-phosphate pyrophosphorylase2C putative	1.14674		Non coding	0.27916
peg.1117;diguanylate cyclase/phosphodiesterase (GGDEF & EAL domains) with PAS/PAC sensor(s)	1.14408		Non coding	0.27872
peg.1731;hypothetical protein	1.14225		Non coding	0.277116
peg.2759;hypothetical protein	1.14191		Non coding	0.277093
peg.1951;PseudoReconstitué Hemolysins and related proteins containing CBS domains	1.14156		Non coding	0.276195
peg.1438;hypothetical protein	1.1411		Non coding	0.275361
peg.634;Lipopolysaccharide ABC transporter2C ATP-binding protein LptB	1.14072		Non coding	0.274952
peg.121;FIG003437: hypothetical with DnaJ-like domain	1.13992		Non coding	0.274681
peg.394;Chromosome (plasmid) partitioning protein ParB / Stage 0 sporulation protein J	1.13968		Non coding	0.274533
peg.578;Hypoxanthine-guanine phosphoribosyltransferase (EC 2.4.2.8);Ontology_term=KEGG_ENZYME:2.4.2.8	1.139		Non coding	0.274101
peg.3017;5'-methylthioadenosine phosphorylase (EC 2.4.2.28);Ontology_term=KEGG_ENZYME:2.4.2.28	1.13726		Non coding	0.274069
peg.1269;hypothetical protein	1.13713		Non coding	0.273996
peg.130;Acetyl-coenzyme A carboxyl transferase alpha chain (EC 6.4.1.2);Ontology_term=KEGG_ENZYME:6.4.1.2	1.13643		Non coding	0.27367
peg.1505;hypothetical protein	1.13622		Non coding	0.272132
peg.2948;MxaL protein	1.13611		Non coding	0.271408
peg.1938;Seryl-tRNA synthetase (EC 6.1.1.11);Ontology_term=KEGG_ENZYME:6.1.1.11	1.13456		Non coding	0.270774
peg.2261;Molybdenum cofactor biosynthesis protein MoaC	1.13428		Non coding	0.270418
peg.647;NAD-dependent epimerase/dehydratase	1.13191		Non coding	0.270061
peg.1943;Protein-export membrane protein SecD (TC 3.A.5.1.1)	1.13118		Non coding	0.269347
peg.2518;Cytochrome c heme lyase subunit CcmF	1.12954		Non coding	0.269218
peg.552;Inner membrane protein translocase component YidC2C long form	1.12871		Non coding	0.269188
peg.847;PseudoReconstitué Signal transduction histidine kinase CheA (EC 2.7.3.-);Ontology_term=KEGG_ENZYME:2.7.3.-	1.12584		Non coding	0.268798
peg.3119;Histidinol-phosphatase [alternative form] (EC 3.1.3.15);Ontology_term=KEGG_ENZYME:3.1.3.15	1.1248		Non coding	0.265737
peg.818;Flagellar motor switch protein FliN	1.1241		Non coding	0.265506
peg.114;hypothetical protein	1.12275		Non coding	0.264792
peg.1031;Inosine-5'-monophosphate dehydrogenase (EC 1.1.1.205);Ontology_term=KEGG_ENZYME:1.1.1.205	1.12197		Non coding	0.264465
peg.2049;Gfa-like protein	1.12139		Non coding	0.263951
peg.1440;Hemin ABC transporter2C permease protein	1.12051		Non coding	0.263902
peg.2859;SSU ribosomal protein S17p (S11e)	1.11901		Non coding	0.262845
peg.921;hypothetical protein	1.11798		Non coding	0.262452
peg.616;zinc transport protein ZnuC	1.11723		Non coding	0.261653
peg.2861;LSU ribosomal protein L16p (L10e)	1.1157		Non coding	0.261382
peg.2422;hypothetical protein	1.11257		Non coding	0.26119
peg.3381;hypothetical protein	1.11228		Non coding	0.259481
peg.92;hypothetical protein	1.10983		Non coding	0.258559
peg.1524;NifU-like domain protein	1.10941		Non coding	0.258102
peg.3118;N-formylglutamate deformylase (EC 3.5.1.68);Ontology_term=KEGG_ENZYME:3.5.1.68	1.10755		Non coding	0.258029
peg.1733;hypothetical protein	1.10667		Non coding	0.258018
peg.1993;FKBP-type peptidyl-prolyl cis-trans isomerase	1.1063		Non coding	0.257153
peg.1471;NnrS protein involved in response to NO	1.10502		Non coding	0.256662
peg.892;hypothetical protein	1.10484		Non coding	0.256407
peg.2252;Phosphoglycerate kinase (EC 2.7.2.3);Ontology_term=KEGG_ENZYME:2.7.2.3	1.10414		Non coding	0.256183
peg.2455;ABC-type transport system involved in resistance to organic solvents2C permease component USSDB6A	1.10367		Non coding	0.255889
peg.3158;tmRNA-binding protein SmpB	1.10333		Non coding	0.25507
peg.1561;Glutathione S-transferase (EC 2.5.1.18);Ontology_term=KEGG_ENZYME:2.5.1.18	1.10294		Non coding	0.254555
rna.25;tRNA-Glu-TTC	1.09991		Non coding	0.253711
peg.2237;putative permeases	1.09971		Non coding	0.253398
peg.432;Leucyl-tRNA synthetase (EC 6.1.1.4);Ontology_term=KEGG_ENZYME:6.1.1.4	1.09954		Non coding	0.250815
peg.1782;hypothetical protein	1.09872		Non coding	0.250769
peg.1657;Chorismate synthase (EC 4.2.3.5);Ontology_term=KEGG_ENZYME:4.2.3.5	1.09818		Non coding	0.247245
peg.566;3-methyl-2-oxobutanoate hydroxymethyltransferase (EC 2.1.2.11);Ontology_term=KEGG_ENZYME:2.1.2.11	1.09693		Non coding	0.245867
peg.155;Acetylornithine aminotransferase (EC 2.6.1.11);Ontology_term=KEGG_ENZYME:2.6.1.11	1.09683		Non coding	0.244583
peg.2205;Queuosine biosynthesis QueD2C PTPS-I	1.09678		Non coding	0.243652
peg.2284;FIG004453: protein YceG like	1.09605		Non coding	0.24034
peg.1157;Glycolate dehydrogenase (EC 1.1.99.14)2C subunit GlcD;Ontology_term=KEGG_ENZYME:1.1.99.14	1.09442		Non coding	0.239966
peg.3160;lytic transglycosylase	1.09365		Non coding	0.239373
peg.3150;PseudoReconstitué Pyridoxine 5'-phosphate synthase (EC 2.6.99.2);Ontology_term=KEGG_ENZYME:2.6.99.2	1.09136		Non coding	0.238877
peg.694;hypothetical protein	1.09051		Non coding	0.238876
peg.986;hypothetical protein	1.0904		Non coding	0.23878
peg.2308;hypothetical protein	1.09031		Non coding	0.237946
peg.1112;conserved hypothetical protein in cyt c oxidase gene clusters	1.09015		Non coding	0.237598
peg.756;Integral membrane protein YggT2C involved in response to extracytoplasmic stress (osmotic shock)	1.08882		Non coding	0.236994
peg.9;PTS system permease (IIAMan)2C nitrogen regulatory IIA protein	1.08857		Non coding	0.236416
peg.465;ATPase	1.08849		Non coding	0.236249
peg.836;Flagellar M-ring protein FliF	1.08752		Non coding	0.234753
peg.777;HNH endonuclease family protein	1.0839		Non coding	0.234078
peg.3026;Aspartyl-tRNA(Asn) amidotransferase subunit C (EC 6.3.5.6) @ Glutamyl-tRNA(Gln) amidotransferase subunit C (EC 6.3.5.7);Ontology_term=KEGG_ENZYME:6.3.5.6,KEGG_ENZYME:6.3.5.7	1.0838		Non coding	0.23318
peg.1133;Periplasmic thiol:disulfide interchange protein DsbA	1.08354		Non coding	0.233153
peg.1940;Membrane protein	1.0834		Non coding	0.232127
peg.2659;Phosphoadenylyl-sulfate reductase [thioredoxin] (EC 1.8.4.8) / Adenylyl-sulfate reductase [thioredoxin] (EC 1.8.4.10);Ontology_term=KEGG_ENZYME:1.8.4.8,KEGG_ENZYME:1.8.4.10	1.08292		Non coding	0.231245
peg.469;hypothetical protein	1.08285		Non coding	0.231065
peg.105;FIG004851: hypothetical protein	1.08247		Non coding	0.230205
peg.224;GTP-binding protein TypA/BipA	1.08181		Non coding	0.230203
peg.209;Small heat shock protein	1.07922		Non coding	0.229678
peg.2169;hypothetical protein	1.07878		Non coding	0.229046
peg.2923;PRC-barrel	1.07832		Non coding	0.228992
peg.87;ABC-type polysaccharide/polyol phosphate transport protein2C ATPase component	1.07823		Non coding	0.228872
peg.691;Translation elongation factor LepA	1.07725		Non coding	0.228283
peg.359;Sulfate transporter family protein in cluster with carbonic anhydrase	1.0767		Non coding	0.228081
peg.3454;hypothetical protein	1.07304		Non coding	0.227929
peg.312;hypothetical protein	1.07226		Non coding	0.224217
peg.3253;DNA polymerase III subunits gamma and tau (EC 2.7.7.7);Ontology_term=KEGG_ENZYME:2.7.7.7	1.07195		Non coding	0.223077
peg.1884;hypothetical protein	1.07144		Non coding	0.222676
peg.3165;hypothetical protein	1.07123		Non coding	0.222628
peg.2884;DNA-directed RNA polymerase beta' subunit (EC 2.7.7.6);Ontology_term=KEGG_ENZYME:2.7.7.6	1.07098		Non coding	0.221473
peg.1767;hypothetical protein	1.07097		Non coding	0.221257
peg.1970;hypothetical protein	1.07003		Non coding	0.220844
peg.1771;hypothetical protein	1.07001		Non coding	0.219346
peg.2714;hypothetical protein	1.06902		Non coding	0.219128
peg.188;FIG00450905: hypothetical protein	1.06685		Non coding	0.218436
peg.1586;hypothetical protein	1.06572		Non coding	0.217762
peg.101;Arabinose 5-phosphate isomerase (EC 5.3.1.13);Ontology_term=KEGG_ENZYME:5.3.1.13	1.06537		Non coding	0.216623
peg.1115;Mitochondrial processing peptidase-like protein (EC 3.4.24.64);Ontology_term=KEGG_ENZYME:3.4.24.64	1.065		Non coding	0.216536
peg.3309;Histone acetyltransferase HPA2 and related acetyltransferases	1.06468		Non coding	0.216338
peg.2213;Pyruvate dehydrogenase E1 component alpha subunit (EC 1.2.4.1);Ontology_term=KEGG_ENZYME:1.2.4.1	1.06275		Non coding	0.215891
peg.2081;Glucosamine--fructose-6-phosphate aminotransferase [isomerizing] (EC 2.6.1.16);Ontology_term=KEGG_ENZYME:2.6.1.16	1.06265		Non coding	0.215771
peg.1315;hypothetical protein	1.0612		Non coding	0.215457
peg.262;RND efflux system2C inner membrane transporter CmeB	1.06057		Non coding	0.215275
peg.945;Ni2CFe-hydrogenase I cytochrome b subunit	1.06041		Non coding	0.213991
peg.742;ParB domain protein nuclease	1.06009		Non coding	0.213976
peg.2344;branched-chain amino acid ABC transporter2C periplasmic amino acid-binding protein	1.05909		Non coding	0.213194
peg.1754;FIG00442049: hypothetical protein	1.0589		Non coding	0.212698
peg.1307;Electron transfer flavoprotein-ubiquinone oxidoreductase (EC 1.5.5.1);Ontology_term=KEGG_ENZYME:1.5.5.1	1.05846		Non coding	0.212604
peg.3269;hypothetical protein	1.05693		Non coding	0.211783
peg.2420;Sensor histidine kinase (EC 2.7.3.-);Ontology_term=KEGG_ENZYME:2.7.3.-	1.0567		Non coding	0.210419
peg.1187;hypothetical protein	1.05645		Non coding	0.20993
peg.2044;hypothetical protein	1.0561		Non coding	0.209668
peg.3070;Topoisomerase IV subunit B (EC 5.99.1.-);Ontology_term=KEGG_ENZYME:5.99.1.-	1.05519		Non coding	0.209104
peg.555;hypothetical protein	1.05477		Non coding	0.207642
peg.65;Arsenate reductase (EC 1.20.4.1);Ontology_term=KEGG_ENZYME:1.20.4.1	1.05355		Non coding	0.207546
peg.835;Flagellin protein FlaA	1.05304		Non coding	0.207361
peg.3051;DNA-binding protein	1.05251		Non coding	0.206808
rna.27;tRNA-Met-CAT	1.05243		Non coding	0.2068
peg.2598;hypothetical protein	1.05018		Non coding	0.206088
peg.3543;hypothetical protein	1.05004		Non coding	0.205855
peg.3396;hypothetical protein	1.04985		Non coding	0.205617
peg.2603;Na(+) H(+) antiporter subunit C	1.04946		Non coding	0.203812
peg.1538;Transcription termination protein NusA	1.04913		Non coding	0.203706
peg.3385;1-deoxy-D-xylulose 5-phosphate synthase (EC 2.2.1.7);Ontology_term=KEGG_ENZYME:2.2.1.7	1.0458		Non coding	0.203141
peg.2142;Transcription elongation factor GreA	1.04418		Non coding	0.202534
peg.2295;Replicative DNA helicase (EC 3.6.1.-);Ontology_term=KEGG_ENZYME:3.6.1.-	1.04365		Non coding	0.201552
peg.1662;Beta-carotene ketolase (EC 1.14.-.-);Ontology_term=KEGG_ENZYME:1.14.-.-	1.04332		Non coding	0.200716
peg.1732;hypothetical protein	1.04193		Non coding	0.200538
peg.115;hypothetical protein	1.0418		Non coding	0.200205
peg.757;hypothetical protein	1.0412		Non coding	0.200072
peg.3281;ZINC PROTEASE (EC 3.4.99.-);Ontology_term=KEGG_ENZYME:3.4.99.-	1.0406		Non coding	0.199056
peg.1589;hypothetical protein	1.0394		Non coding	0.198945
peg.3207;DNA-binding response regulator2C LuxR family	1.03847		Non coding	0.198231
peg.2127;putative lipoprotein	1.03831		Non coding	0.197514
peg.3238;Methylmalonyl-CoA epimerase (EC 5.1.99.1)%3B Ethylmalonyl-CoA epimerase;Ontology_term=KEGG_ENZYME:5.1.99.1	1.03764		Non coding	0.196638
peg.1064;hypothetical protein	1.03624		Non coding	0.196475
peg.2423;conserved hypothetical protein2C predicted peptidase aspartic family	1.036		Non coding	0.196313
peg.2317;FIG139612: Possible conserved membrane protein	1.03494		Non coding	0.195903
peg.2318;PseudoReconstitué FIG003603: membrane protein2C putative	1.03447		Non coding	0.193762
peg.1939;5-nucleotidase SurE (EC 3.1.3.5);Ontology_term=KEGG_ENZYME:3.1.3.5	1.03446		Non coding	0.193
peg.805;Flagellar protein FlbT	1.03409		Non coding	0.191817
peg.2881;Inorganic pyrophosphatase (EC 3.6.1.1);Ontology_term=KEGG_ENZYME:3.6.1.1	1.03347		Non coding	0.191659
peg.2950;MxaC2C protein involved in Ca2+ insertion into methanol dehydrogenase	1.0332		Non coding	0.190902
peg.2781;Undecaprenyl pyrophosphate synthetase (EC 2.5.1.31);Ontology_term=KEGG_ENZYME:2.5.1.31	1.03288		Non coding	0.190861
peg.2860;LSU ribosomal protein L29p (L35e)	1.03218		Non coding	0.190181
peg.153;hypothetical protein	1.03065		Non coding	0.189829
peg.3274;4-hydroxybenzoate polyprenyltransferase (EC 2.5.1.39);Ontology_term=KEGG_ENZYME:2.5.1.39	1.02795		Non coding	0.1894
peg.116;SCP-like extracellular protein	1.02772		Non coding	0.188667
peg.3497;Tryptophan synthase beta chain (EC 4.2.1.20);Ontology_term=KEGG_ENZYME:4.2.1.20	1.0272		Non coding	0.187223
peg.243;hypothetical protein	1.02664		Non coding	0.187048
peg.3148;Signal peptidase I (EC 3.4.21.89);Ontology_term=KEGG_ENZYME:3.4.21.89	1.02623		Non coding	0.186225
peg.2941;TonB-dependent receptor	1.02559		Non coding	0.185129
peg.2288;Malonyl CoA-acyl carrier protein transacylase (EC 2.3.1.39);Ontology_term=KEGG_ENZYME:2.3.1.39	1.02523		Non coding	0.18444
peg.875;Biopolymer transport protein ExbD/TolR	1.02455		Non coding	0.183962
peg.403;hypothetical protein	1.02405		Non coding	0.183421
peg.2741;hypothetical protein	1.02038		Non coding	0.182537
peg.541;perosamine synthetase	1.01949		Non coding	0.181921
peg.221;Argininosuccinate synthase (EC 6.3.4.5);Ontology_term=KEGG_ENZYME:6.3.4.5	1.01728		Non coding	0.181286
peg.2415;hypothetical protein	1.01634		Non coding	0.180605
peg.2517;Cytochrome c heme lyase subunit CcmL	1.01627		Non coding	0.179643
peg.16;cobalamin synthesis protein2C P47K	1.0151		Non coding	0.179299
peg.2660;Sulfate adenylyltransferase subunit 2 (EC 2.7.7.4);Ontology_term=KEGG_ENZYME:2.7.7.4	1.01464		Non coding	0.176871
peg.1134;Periplasmic thiol:disulfide interchange protein DsbA	1.01392		Non coding	0.176402
peg.1539;COG2740: Predicted nucleic-acid-binding protein implicated in transcription termination / ribosomal protein L7Ae family protein	1.01342		Non coding	0.176123
peg.413;PQQ-dependent oxidoreductase2C gdhB family	1.0129		Non coding	0.175946
peg.3286;Methanol dehydrogenase large subunit protein (EC 1.1.99.8);Ontology_term=KEGG_ENZYME:1.1.99.8	1.01198		Non coding	0.175385
peg.695;hypothetical protein	1.01142		Non coding	0.174876
peg.692;hypothetical protein	1.0109		Non coding	0.173309
peg.1284;hypothetical protein	1.01039		Non coding	0.172864
peg.2857;LSU ribosomal protein L24p (L26e)	1.0091		Non coding	0.172697
peg.3484;Ribose-phosphate pyrophosphokinase (EC 2.7.6.1);Ontology_term=KEGG_ENZYME:2.7.6.1	1.00907		Non coding	0.171868
peg.1511;Transcriptional regulator2C LuxR family	1.00739		Non coding	0.171284
peg.1116;Ribosomal-protein-S5p-alanine acetyltransferase	1.00691		Non coding	0.170404
peg.3178;hypothetical protein	1.00411		Non coding	0.16993
peg.3123;Glutamate synthase [NADPH] large chain (EC 1.4.1.13);Ontology_term=KEGG_ENZYME:1.4.1.13	1.00333		Non coding	0.167339
peg.445;Thiol:disulfide oxidoreductase TlpA	0.997442		Non coding	0.167076
peg.1300;PROBABLE CATION-EFFLUX SYSTEM TRANSMEMBRANE PROTEIN	0.997019		Non coding	0.166996
peg.2600;hypothetical protein	0.996634		Non coding	0.166295
peg.219;hypothetical protein	0.996615		Non coding	0.16582
peg.2819;hypothetical protein	0.995329		Non coding	0.165516
peg.2495;Enoyl-CoA hydratase (EC 4.2.1.17);Ontology_term=KEGG_ENZYME:4.2.1.17	0.99532		Non coding	0.165393
peg.2343;High-affinity leucine-specific transport system2C periplasmic binding protein LivK (TC 3.A.1.4.1)	0.995228		Non coding	0.164736
peg.237;Probable protease htpX homolog (EC 3.4.24.-);Ontology_term=KEGG_ENZYME:3.4.24.-	0.99521		Non coding	0.164342
peg.2319;FIG003492: Threonine dehydrogenase and related Zn-dependent dehydrogenases	0.995183		Non coding	0.16375
peg.2892;PlcB2C ORFX2C ORFP2C ORFB2C ORFA2C ldh gene	0.99506		Non coding	0.163184
peg.1781;hypothetical protein	0.994984		Non coding	0.161823
peg.1295;hypothetical protein	0.99388		Non coding	0.161816
rna.21;tRNA-Glu-CTC	0.992297		Non coding	0.161644
peg.355;Mesaconyl-CoA hydratase	0.990705		Non coding	0.161412
rna.22;tRNA-Arg-CCT	0.99061		Non coding	0.160773
peg.2316;FIG017823: ATPase2C MoxR family	0.989805		Non coding	0.160095
peg.1364;N-acetylmuramoyl-L-alanine amidase (EC 3.5.1.28);Ontology_term=KEGG_ENZYME:3.5.1.28	0.988325		Non coding	0.159896
peg.3155;hypothetical protein	0.987598		Non coding	0.15919
peg.337;hypothetical protein	0.987317		Non coding	0.159142
peg.870;Ferric iron ABC transporter2C iron-binding protein	0.987279		Non coding	0.158903
peg.1368;Methylene tetrahydromethanopterin dehydrogenase (EC 1.5.99.9);Ontology_term=KEGG_ENZYME:1.5.99.9	0.986192		Non coding	0.158538
peg.2434;Lead2C cadmium2C zinc and mercury transporting ATPase (EC 3.6.3.3) (EC 3.6.3.5)%3B Copper-translocating P-type ATPase (EC 3.6.3.4);Ontology_term=KEGG_ENZYME:3.6.3.3,KEGG_ENZYME:3.6.3.5,KEGG_ENZYME:3.6.3.4	0.98594		Non coding	0.157768
peg.2353;Phosphoribosylformylglycinamidine synthase2C glutamine amidotransferase subunit (EC 6.3.5.3);Ontology_term=KEGG_ENZYME:6.3.5.3	0.98416		Non coding	0.156755
peg.2170;3-methylmercaptopropionyl-CoA ligase (DmdB)	0.982102		Non coding	0.156388
peg.2604;Na(+) H(+) antiporter subunit D	0.981313		Non coding	0.156206
peg.321;hypothetical protein	0.981208		Non coding	0.155001
peg.1668;OpgC protein	0.981161		Non coding	0.154436
peg.167;Imidazoleglycerol-phosphate dehydratase (EC 4.2.1.19);Ontology_term=KEGG_ENZYME:4.2.1.19	0.98032		Non coding	0.154249
peg.2602;Na(+) H(+) antiporter subunit A%3B Na(+) H(+) antiporter subunit B	0.97909		Non coding	0.154051
peg.1107;Cytochrome c oxidase polypeptide II (EC 1.9.3.1);Ontology_term=KEGG_ENZYME:1.9.3.1	0.979088		Non coding	0.153726
peg.2798;Ribosomal large subunit pseudouridine synthase C (EC 4.2.1.70);Ontology_term=KEGG_ENZYME:4.2.1.70	0.978213		Non coding	0.153645
peg.582;1-acyl-sn-glycerol-3-phosphate acyltransferase (EC 2.3.1.51);Ontology_term=KEGG_ENZYME:2.3.1.51	0.975586		Non coding	0.153593
peg.137;Hypothetical protein PA1329	0.975539		Non coding	0.153547
peg.3000;hypothetical protein	0.973551		Non coding	0.153508
peg.3054;Superoxide dismutase [Fe] (EC 1.15.1.1);Ontology_term=KEGG_ENZYME:1.15.1.1	0.973444		Non coding	0.152779
peg.61;Septum formation protein Maf	0.972848		Non coding	0.152396
peg.176;DNA gyrase subunit B (EC 5.99.1.3);Ontology_term=KEGG_ENZYME:5.99.1.3	0.970538		Non coding	0.151708
peg.2446;Threonine dehydrogenase and related Zn-dependent dehydrogenases	0.970379		Non coding	0.151507
peg.2244;conserved hypothetical protein	0.969054		Non coding	0.151491
peg.3349;hypothetical protein	0.967052		Non coding	0.150705
peg.3164;hypothetical protein	0.96593		Non coding	0.149964
peg.2057;Pole remodelling regulatory diguanylate cyclase	0.965542		Non coding	0.149022
peg.1758;hypothetical protein	0.964797		Non coding	0.148671
peg.2219;Putative oligoketide cyclase/dehydratase or lipid transport protein YfjG	0.964655		Non coding	0.148091
peg.26;hypothetical protein	0.964374		Non coding	0.146886
peg.415;hypothetical protein	0.964336		Non coding	0.146874
peg.1498;transcriptional regulator2C Crp/Fnr family	0.963059		Non coding	0.146872
peg.2292;hypothetical protein	0.962636		Non coding	0.146379
peg.2020;hypothetical protein	0.962426		Non coding	0.146347
[truncated: 2,590 more rows]

## Sheet: Carbon flux
	TPM		Biofilm/pure cultures
[truncated: 143 more rows]

## Sheet: Nitrogen quant
	TPM		Biofilm/pure cultures	Gene tag (RAST), Function											KO number
[truncated: 63 more rows]

[truncated: 4 more sheets: transport, Iron, Respiratory, Sulfur]
